# Supplementary material
Source: publisher figshare collection journal article supplement (https://gsajournals.figshare.com/ndownloader/files/13479752)
Supplement: Supplementary file 1 [file 13479752]

Archive with 7 entries (7 files):
- Nme.basepairs.by.type.txt
- Nme.TE.groups.counts.txt
- Nme.TE.RM.annotation.report.txt
- Nme.TE.fa
- Nme.TE.gff
- Nme.TE.elements.counts.txt
- S3.Nme.Repeats.Report.pdf
