# Supplementary material
Source: publisher figshare collection journal article supplement (https://gsajournals.figshare.com/ndownloader/files/13479752)
Supplement: Supplementary file 1 [file 13479752 › Nme.basepairs.by.type.txt]

LTR	1109663
LINE	2259744
SINE	17413
DNA	90819
MITE	0
Helitron	1586
rRNA	17649
Low_Complexity	1694296
Satellite	1792
Tandem_repeats	0
Simple_repeat	4011481
others	3590869
na	31027448
Others	0
Total	121312000
