# Supplementary material
Source: publisher figshare collection journal article supplement (https://gsajournals.figshare.com/ndownloader/files/13479752)
Supplement: Supplementary file 1 [file 13479752 › Nme.TE.elements.counts.txt]

    142 ?
      2 5S_CPo
      5 5S_DM
      2 (AAAAAG)n
      1 (AAAAAT)n
      1 (AAAAC)n
      2 (AAAAT)n
      1 (AAACGAG)n
      1 (AAACG)n
      1 (AAACTTTC)n
      3 (AAAGAA)n
      1 (AAAGA)n
      1 (AAAGGTA)n
      2 (AAAG)n
      1 (AAAGT)n
      1 (AAATAT)n
      1 (AAATG)n
     13 (AAAT)n
      1 (AAATT)n
      1 (AAATTTGA)n
      1 (AACAAC)n
      2 (AACAA)n
      1 (AACAATC)n
      1 (AACAAT)n
      1 (AACACATC)n
      1 (AACAGA)n
      1 (AACAGTA)n
      1 (AACA)n
      1 (AACATAA)n
      1 (AACATA)n
      1 (AACATTT)n
      1 (AACCA)n
      1 (AACGA)n
      1 (AACGCG)n
      1 (AACGGAG)n
      6 (AACG)n
      4 (AAC)n
      1 AACOPIA1_I-int
      1 (AACTCA)n
      1 (AACTGA)n
      1 (AACTGT)n
      2 (AACTTAA)n
      1 (AACTTGCA)n
      1 (AACTT)n
      1 (AACTTT)n
      1 (AAGAATG)n
      4 (AAGA)n
      1 (AAGATAA)n
      1 (AAGATT)n
      1 (AAGATTTG)n
      1 (AAGCTAA)n
      4 (AAGG)n
      1 (AAGGTTA)n
     10 (AAG)n
      1 (AAGTAG)n
      1 (AAGTGTA)n
      1 (AAGTTC)n
      1 (AAGTTTC)n
      2 (AATAACA)n
      2 (AATAAC)n
      1 (AATAAG)n
      1 (AATAAGT)n
      1 (AATAAGTT)n
     12 (AATAA)n
      3 (AATAATA)n
      4 (AATAAT)n
      3 (AATAATT)n
      1 (AATACAC)n
      1 (AATACA)n
      1 (AATACC)n
      3 (AATAC)n
      1 (AATACTC)n
      2 (AATAGAA)n
      1 (AATAGA)n
      3 (AATAG)n
      1 (AATAGTT)n
     33 (AATA)n
      2 (AATATAA)n
      1 (AATATAG)n
      6 (AATATA)n
      1 (AATATAT)n
      2 (AATATC)n
      2 (AATATG)n
     18 (AATAT)n
      1 (AATATTAA)n
      1 (AATATTAC)n
      5 (AATATTA)n
      1 (AATATTCA)n
      3 (AATATTC)n
      1 (AATATTG)n
     13 (AATATT)n
      1 (AATATTTG)n
      5 (AATATTT)n
      1 (AATCAAT)n
      1 (AATCA)n
      1 (AATCATA)n
      1 (AATCG)n
      1 (AATCGT)n
      2 (AATC)n
      1 (AATCTAG)n
      1 (AATCT)n
      1 (AATCTTG)n
      1 (AATGAAC)n
      1 (AATGAC)n
      4 (AATGA)n
      1 (AATGAT)n
      1 (AATGATT)n
      1 (AATGCA)n
      1 (AATGGT)n
      1 (AATGGTTG)n
      1 (AATG)n
      1 (AATGTAA)n
      1 (AATGTA)n
      2 (AATGTTT)n
     66 (AAT)n
      1 (AATTAACT)n
      3 (AATTAA)n
      1 (AATTAAT)n
      1 (AATTAGC)n
      1 (AATTAGTA)n
      1 (AATTAGT)n
      9 (AATTA)n
      1 (AATTATCG)n
      1 (AATTATG)n
      7 (AATTAT)n
      3 (AATTATT)n
      1 (AATTCA)n
      1 (AATTCG)n
      3 (AATTC)n
      1 (AATTGAA)n
      1 (AATTGAC)n
      3 (AATTGA)n
      1 (AATTGAT)n
      1 (AATTGGGG)n
      1 (AATTG)n
     30 (AATT)n
      2 (AATTTAA)n
      1 (AATTTAC)n
      3 (AATTTA)n
      1 (AATTTAT)n
      3 (AATTTC)n
      1 (AATTTGA)n
      1 (AATTTG)n
     17 (AATTT)n
      1 (AATTTTAAC)n
      1 (AATTTTC)n
      2 (AATTTT)n
      1 (AATTTTT)n
      1 (ACAAC)n
      1 (ACAAGAT)n
      1 (ACAA)n
      1 (ACAATAA)n
      1 (ACAATAT)n
      1 (ACAATG)n
      1 (ACAAT)n
      4 (ACAATT)n
      1 (ACACCT)n
      1 (ACACGC)n
      1 (ACAC)n
      1 (ACACTC)n
      6 Academ
      1 (ACAG)n
      1 (ACAGTA)n
      1 (ACAGTT)n
      7 (ACA)n
      1 (ACATAA)n
      1 (ACATA)n
      1 (ACATATT)n
      1 (ACATC)n
      1 (ACATTTT)n
      1 (ACCG)n
      5 (ACC)n
      1 (ACGAAT)n
      1 (ACGACA)n
      1 (ACGACG)n
      1 (ACGAGA)n
      1 (ACGAGAT)n
      1 (ACGAGT)n
      6 (ACGA)n
      4 (ACGCG)n
      1 (ACGG)n
      7 (ACG)n
      1 (ACGTC)n
     14 (AC)n
      1 (ACTAGTG)n
      2 (ACTATA)n
      1 (ACTGTA)n
      1 (ACTTAA)n
      1 (ACTTCAA)n
      3 (ACTTCCT)n
      1 (ACTTG)n
      1 (ACTT)n
      1 (ACTTTGAG)n
      2 AFROSINE3
      1 (AGAAA)n
      1 (AGAAC)n
      1 (AGAAGAG)n
      7 (AGAA)n
      1 (AGAATA)n
      2 (AGAAT)n
      1 (AGAATT)n
      1 (AGACAGAAAG)n
      1 (AGACAG)n
      1 (AGACA)n
      2 (AGACGA)n
      1 (AGAGAA)n
      1 (AGAGAGAC)n
      1 (AGAGAGT)n
      1 (AGAGA)n
      1 (AGAGAT)n
      2 (AGAGCG)n
      4 (AGAG)n
      1 (AGAGTCAT)n
      1 (AGAGT)n
      8 (AGA)n
      1 (AGATAG)n
      1 (AGATAT)n
      3 (AGAT)n
      1 (AGATTGGT)n
      1 (AGATTTA)n
      1 (AGATTTT)n
      1 (AGCAGA)n
      1 (AGCCG)n
      2 (AGCC)n
      5 (AGCG)n
      1 (AGCGTGACA)n
      1 (AGCGTGT)n
      7 (AGC)n
      1 (AGCTATT)n
      1 (AGCTCT)n
      1 (AGGAACT)n
      1 (AGGAA)n
      2 (AGGA)n
      1 (AGGCGAAGCT)n
      1 (AGGCTTG)n
      1 (AGGGAAACGA)n
      5 (AGG)n
      1 (AGGTAG)n
      1 (AGGT)n
      1 Ag-Jen-1
      1 Ag-Jock-1
      1 AGM1
    104 (AG)n
      1 (AGTAAC)n
      1 (AGTAAT)n
      2 (AGTA)n
      1 (AGTATAGA)n
      3 (AGTAT)n
      1 (AGTATTT)n
      1 (AGTCAT)n
      1 (AGTCC)n
      3 (AGT)n
      1 (AGTTCT)n
      1 (AGTTTAA)n
      1 (AGTTTAT)n
      1 (AGTTTGAA)n
      1 (AGTTTT)n
      5 ALFARE2_LTR
      1 Ambal-3N1_FCy
     15 (A)n
    515 A-rich
      3 (ATAAA)n
      1 (ATAAATA)n
      1 (ATAACAA)n
      1 (ATAAC)n
      1 (ATAACTG)n
      1 (ATAAGTT)n
     28 (ATAA)n
      3 (ATAATAA)n
      1 (ATAATAC)n
      1 (ATAATAG)n
      1 (ATAATA)n
      3 (ATAATAT)n
      1 (ATAATC)n
      1 (ATAATGT)n
     11 (ATAAT)n
      2 (ATAATTA)n
      1 (ATAATTG)n
      5 (ATAATT)n
      2 (ATAATTT)n
      1 (ATACAA)n
      2 (ATACA)n
      1 (ATACATA)n
      1 (ATACGTA)n
      5 (ATAC)n
      1 (ATACTAGTG)n
      1 (ATACTTA)n
      1 (ATAGAA)n
      2 (ATAGAAT)n
      1 (ATAGAGG)n
      2 (ATAGA)n
      1 (ATAGATTG)n
      1 (ATAGATT)n
      4 (ATAG)n
      1 (ATAGTAA)n
      1 (ATAGTA)n
      1 (ATAGT)n
     49 (ATA)n
      1 (ATATAAC)n
      9 (ATATAA)n
      3 (ATATAAT)n
      3 (ATATAC)n
      1 (ATATAGA)n
     17 (ATATA)n
      4 (ATATATA)n
      1 (ATATATC)n
      1 (ATATAT)n
      2 (ATATATT)n
      1 (ATATCTA)n
      1 (ATATCT)n
      1 (ATATGA)n
      1 (ATATGAT)n
      1 (ATATG)n
      5 (ATATGT)n
     14 (ATAT)n
      3 (ATATTAA)n
      1 (ATATTAC)n
      1 (ATATTAG)n
      4 (ATATTA)n
      1 (ATATTAT)n
      1 (ATATTCA)n
      1 (ATATTC)n
     16 (ATATT)n
      2 (ATATTTA)n
      1 (ATATTTC)n
      1 (ATATTTCT)n
      8 (ATATTT)n
      3 (ATATTTT)n
      1 (ATCAAACC)n
      3 (ATCAA)n
      1 (ATCAATA)n
      1 (ATCAAT)n
      2 (ATCA)n
      1 (ATCATTA)n
      1 (ATCATT)n
      1 (ATCCATG)n
      1 (ATCCG)n
      1 (ATCGA)n
      1 (ATCGG)n
      4 (ATCG)n
      4 (ATC)n
      1 (ATCTAAGT)n
      3 (ATCTA)n
      1 (ATCTAT)n
      1 (ATCTCCG)n
      2 (ATCT)n
      1 (ATCTTGT)n
      1 (ATCTTTT)n
      1 (ATGAA)n
      1 (ATGAAT)n
      1 (ATGACTCG)n
      1 (ATGAG)n
      1 (ATGAGTA)n
      2 (ATGA)n
      1 (ATGATA)n
      1 (ATGAT)n
      1 (ATGATTTA)n
      1 (ATGGTA)n
      1 (ATGGT)n
      2 (ATG)n
      1 (ATGTAAC)n
      1 (ATGTAA)n
      1 (ATGTAAT)n
      1 (ATGTAT)n
      1 (ATGTATT)n
      1 (ATGTCT)n
      7 (ATGT)n
      1 (ATGTTA)n
      1 (ATGTTAT)n
      1 ATLANTYS3I
    137 (AT)n
      1 (ATTAAC)n
     12 (ATTAA)n
      3 (ATTAATA)n
      1 (ATTAATAT)n
     10 (ATTAAT)n
      3 (ATTAATT)n
      1 (ATTACAG)n
      1 (ATTACA)n
      2 (ATTACAT)n
      1 (ATTAC)n
      2 (ATTACTA)n
      4 (ATTACT)n
      3 (ATTACTT)n
      1 (ATTAG)n
      1 (ATTAGTA)n
     20 (ATTA)n
      4 (ATTATAA)n
      1 (ATTATAG)n
      3 (ATTATA)n
      3 (ATTATAT)n
      1 (ATTATCA)n
      1 (ATTATGT)n
     14 (ATTAT)n
      1 (ATTATTA)n
      1 (ATTATTC)n
      1 (ATTATTGTT)n
      3 (ATTATTT)n
      1 (ATTCAA)n
      1 (ATTCAATA)n
      1 (ATTCA)n
      1 (ATTCATC)n
      2 (ATTCAT)n
      1 (ATTCATT)n
      1 (ATTCCG)n
      2 (ATTCG)n
      2 (ATTC)n
      1 (ATTCTAT)n
      2 (ATTCT)n
      1 (ATTCTTA)n
      1 (ATTCTTC)n
      1 (ATTGAA)n
      1 (ATTGAAT)n
      1 (ATTGATA)n
      1 (ATTGATG)n
      1 (ATTGC)n
      1 (ATTG)n
      1 (ATTGTA)n
      1 (ATTGT)n
      1 (ATTGTT)n
      1 (ATTGTTTA)n
     73 (ATT)n
      3 (ATTTAA)n
      2 (ATTTAATA)n
      1 (ATTTACAG)n
      1 (ATTTACA)n
      3 (ATTTAC)n
      1 (ATTTACT)n
      1 (ATTTAGT)n
      9 (ATTTA)n
      1 (ATTTATA)n
      1 (ATTTATC)n
      4 (ATTTAT)n
      2 (ATTTATT)n
      1 (ATTTCAA)n
      1 (ATTTCAG)n
      1 (ATTTCA)n
      5 (ATTTC)n
      1 (ATTTCTAC)n
      1 (ATTTCT)n
      1 (ATTTCTT)n
      2 (ATTTGA)n
      1 (ATTTGGAG)n
      2 (ATTTGTA)n
      3 (ATTTGT)n
     35 (ATTT)n
      1 (ATTTTAATA)n
      1 (ATTTTAC)n
      3 (ATTTTA)n
      1 (ATTTTAT)n
      1 (ATTTTC)n
      2 (ATTTTGA)n
     17 (ATTTT)n
      1 (ATTTTTA)n
      4 (ATTTTT)n
      1 (ATTTTTT)n
      1 BEL-10_CQ-I
      1 BEL-12_CGi-I
      1 BEL-12_CQ-I
      1 BEL12-I_AG
      1 BEL-12_LH-I
      3 BEL-13_LH-I
      1 BEL-14_DP-I
      1 BEL-157_AA-I
      1 BEL-15_DPu-I
      1 BEL-179_AA-I
      1 BEL-188_AA-I
      1 BEL-18_DPu-I
      1 BEL-196_AA-I
      1 BEL19-I_DR
      3 BEL-1_AEc-I
      1 BEL-1_Ano-I
      1 BEL-1_DGri-I
      1 BEL-1_DRh-I
      1 BEL1-I_DR
      1 BEL1-LTR_SM
      1 BEL-1_SI-I
      2 BEL-200_AA-I
      1 BEL-207_AA-I
      1 BEL-220_AA-I
      1 BEL-222_AA-I
      1 BEL-222_AA-LTR
      1 BEL-224_AA-I
      1 BEL-235_AA-I
      1 BEL-24_AA-I
      1 BEL-256_AA-I
      2 BEL-25_AA-I
      1 BEL-267_AA-I
      1 BEL27-I_DR
      1 BEL-284_AA-I
      1 BEL-2_AEc-I
      1 BEL-2_DPu-I
      1 BEL2-I_Dpse
      1 BEL-2_LH-I
      1 BEL2_MH-I
      1 BEL-2_PBa-I
      1 BEL-2_SI-I
      1 BEL-34_CQ-I
      1 BEL35-I_DR
      1 BEL-3_Deu-I
      1 BEL3_DM-I
      4 BEL-3-I_NVi
      1 BEL-3_SI-I
      1 BEL-3_SSa-I
      1 BEL-40_CQ-I
      1 BEL-46_CQ-I
      1 BEL-4_CGi-I
      1 BEL-4_DAn-I
      1 BEL-4_DPer-I
      1 BEL-4_DYa-I
      1 BEL-4_LH-I
      2 BEL-4_SI-I
      1 BEL-4_SSa-I
      1 BEL-53_AA-I
      1 BEL-592_AA-I
      1 BEL-593_AA-I
      1 BEL-5_DYa-I
      1 BEL-5_SI-I
      1 BEL-625_AA-I
      1 BEL-626_AA-I
      1 BEL-63_CQ-I
      1 BEL-649_AA-I
      1 BEL-6_GA-I
      1 BEL6-I_AG
      1 BEL-6_SI-I
      1 BEL-70_AA-I
      1 BEL-73_AA-I
      1 BEL-74_CQ-I
      1 BEL-75_AA-I
      1 BEL-77_CQ-I
      1 BEL-7_CGi-LTR
      1 BEL-7_CQ-I
      1 BEL-7_DTa-I
      1 BEL-87_CQ-I
      1 BEL-8_Adi-I
      1 BEL8-I_AG
      1 BEL-8_SI-I
      1 BEL-95_AA-I
      1 BEL-9_CSa-I
      1 BEL-9_LH-I
      2 BEL-9_SI-I
      1 BovB_ACo
      1 BovB_ALi
      1 BovB_PMo
      1 (CAACAC)n
      1 (CAAGACTTC)n
      8 (CAA)n
      2 (CAATAA)n
      1 (CAATAAT)n
      1 (CAATAC)n
      2 (CAATATAGTT)n
      1 (CAATATT)n
      1 (CAATGAA)n
      1 (CAATGTG)n
      1 (CAATTCT)n
      2 (CAATT)n
      1 (CAATTTA)n
      2 (CAATTT)n
      1 (CAATTTT)n
      1 (CACACG)n
      1 (CACACT)n
      1 (CACATTT)n
      1 (CACCAT)n
      1 (CACCGGA)n
      1 (CACG)n
      3 (CAC)n
     67 CACTA
      1 (CACTT)n
      2 (CAGCAA)n
      1 (CAGCAGCACA)n
      1 (CAGC)n
      1 (CAGCTC)n
      1 (CAGGA)n
      2 (CAGG)n
      3 (CAG)n
      8 (CA)n
      1 CarLTR1A1C_LTR
      1 (CATAAT)n
      2 (CATA)n
      2 (CATATA)n
      1 CATCH2LTR_DR
      1 (CATCTT)n
      2 (CAT)n
      1 (CATTATT)n
      1 (CATTCT)n
      1 (CATT)n
      1 (CATTTCT)n
      2 (CATTT)n
      1 (CCACCG)n
      1 (CCACC)n
      1 (CCAC)n
      1 (CCAGCCAA)n
      4 (CCA)n
      1 (CCCCAAG)n
      1 (CCCCG)n
      1 (CCCCGT)n
      1 (CCCCT)n
      1 (CCCGCC)n
      1 (CCCGC)n
      2 (CCCGT)n
      1 (CCCTCCG)n
      1 (CCCTCT)n
      1 (CCCT)n
      1 (CCGAG)n
      2 (CCGA)n
      1 (CCGCA)n
      1 (CCGCCA)n
      1 (CCGCCCT)n
      1 (CCGCGC)n
      5 (CCGCG)n
      1 (CCGCGT)n
      1 (CCGC)n
      1 (CCGGG)n
      1 (CCGGGT)n
      3 (CCGG)n
     13 (CCG)n
      1 (CCGTC)n
      1 (CCGTCT)n
      4 (CCGT)n
      1 (CCGTTC)n
      1 (CCGTT)n
      1 (CCTCCC)n
      1 (CCTCC)n
      1 (CCTCCTCCA)n
      1 (CCTCCT)n
      1 (CCTC)n
      1 (CCTCTGT)n
      9 (CCT)n
      1 (CCTTATG)n
      1 (CCTTCT)n
      1 (CCTTGATTTT)n
      3 (CCTT)n
      1 CER12-I_CE
      4 CER15-1-I_CE
      3 CER15-I_CE
      1 (CGAAATATG)n
      1 (CGAAGAA)n
      1 (CGAAGA)n
      5 (CGAA)n
      1 (CGAATC)n
      1 (CGAAT)n
      2 (CGACA)n
      1 (CGACCT)n
      1 (CGACGA)n
      1 (CGACGAT)n
      1 (CGACGG)n
      6 (CGACG)n
      1 (CGACT)n
      1 (CGAGAG)n
      2 (CGAGA)n
      1 (CGAGCG)n
      1 (CGAGC)n
      1 (CGAGGA)n
      2 (CGAGG)n
      8 (CGAG)n
      2 (CGAGT)n
     12 (CGA)n
      1 (CGATAT)n
      1 (CGATCG)n
      1 (CGATC)n
      1 (CGATGA)n
      1 (CGATGG)n
      3 (CGAT)n
      2 (CGATT)n
      1 (CGCAG)n
      1 (CGCA)n
      1 (CGCCA)n
      4 (CGCCG)n
      1 (CGCCGT)n
      1 (CGCCT)n
      1 (CGCGAA)n
      3 (CGCGA)n
      1 (CGCGAT)n
      1 (CGCGCA)n
      1 (CGCGCGA)n
      6 (CGCGC)n
      7 (CGCGG)n
      2 (CGCG)n
      1 (CGCGTCTT)n
      2 (CGCGT)n
      1 (CGCGTT)n
     16 (CGC)n
      1 (CGCTGC)n
      1 (CGCTG)n
      8 (CGCT)n
      1 (CGGAGA)n
      5 (CGGA)n
      1 (CGGCAAG)n
      1 (CGGCA)n
      1 (CGGCC)n
      1 (CGGCGAT)n
      5 (CGGCG)n
      1 (CGGCGT)n
      5 (CGGC)n
      1 (CGGCT)n
      1 (CGGGC)n
      1 (CGGGT)n
     16 (CGG)n
      1 (CGGTCCT)n
      1 (CGGTGT)n
      1 (CGGTTCT)n
      1 (CGGTT)n
     33 (CG)n
      1 (CGTAAAC)n
      1 (CGTACA)n
      1 (CGTATTG)n
      2 (CGTCGC)n
      5 (CGTCG)n
      1 (CGTCT)n
      1 (CGTGAAC)n
      1 (CGTGCT)n
      5 (CGTG)n
      1 (CGTGT)n
      1 (CGTGTT)n
      8 (CGT)n
      1 (CGTTCCAA)n
      1 (CGTTCCA)n
      1 (CGTTCCT)n
      1 (CGTTCG)n
      1 (CGTTCT)n
      1 (CGTTGAT)n
      1 (CGTTGC)n
      1 (CGTTGT)n
      1 (CGTTTAC)n
      1 (CGTTTCT)n
      1 (CGTTTGCG)n
      3 (CGTTT)n
      9 Chapaev
      3 Charlie12_
      6 (C)n
      1 COP8_I_MT-int
      2 Copia-10_LH-I
      1 Copia-114_AA-I
      1 Copia-11_BRa-I
      1 Copia-11_EPa-I
      1 Copia-120_AA-I
      1 Copia-128_SB-I
      1 Copia-12_SSa-I
      1 Copia-130_CCri-LTR
      1 Copia-139_CCri-I
      1 Copia13-NVi_I-int
      5 Copia-13_SI-I
      1 Copia-141_SB-LTR
      1 Copia-14_BG-I
      1 Copia-14_JC-I
      1 Copia-15_ECa-I
      1 Copia-15_MLP-I
      1 Copia-16_PAb-I
      1 Copia-17_EPa-I
      1 Copia-17_TC-I
      2 Copia17-ZM_I-int
      1 Copia-18_BD-I
      1 Copia-1_BM-I
      1 Copia-1_CMe-I
      1 Copia-1_CP-I
      1 Copia-1_DEl-I
      3 Copia-1_DGri-I
      1 Copia-1_DSe-I
      1 Copia-1-I_HS
      1 Copia-1_LENY-LTR
      1 COPIA1-LTR_LC
      1 Copia1_LTR_MT_
      3 Copia-1_ST-LTR
      1 Copia-21_CQ-I
      1 Copia-21_Mad-LTR_
      1 Copia-21_SI-I
      1 Copia-22_SI-I
      2 Copia-23_NVi-I
      1 Copia-24_JC-I
      1 Copia-24_LU-I
      1 Copia-25_BG-I
      1 Copia-25_LU-I
      1 Copia25-PTR_LTR
      1 Copia-27_BD-I
      2 Copia-27_GM-I
      1 Copia-27_SI-I
      1 Copia-28_BD-I
      1 Copia-29-I_VV_
      1 Copia-29_Pru-I
      1 Copia-2_Cfl-I
      1 Copia-2_CH
      1 Copia-2_DBp-I
      1 Copia-2_FV-LTR
      1 Copia2-I_TP
      1 COPIA2-LTR_MT
      1 Copia-2_SL-I
      1 Copia-31_Pru-LTR
      1 Copia31-PTR_I_
      1 Copia-31_PX-I
      1 Copia-32_ST-I
      1 Copia-33_GM-I
      1 Copia-34_JC-I
      1 Copia-35_ATr-I
      1 Copia-35_BD-I
      1 Copia-35_DPu-I
      1 Copia-37_RC-I
      1 Copia-39_ECa-I
      1 Copia-39-I_ZM
      1 Copia-3_BM-I
      1 Copia-3_DWil-I
      1 Copia-3_TC-I
      1 Copia-41_ALY-I
      1 Copia-42_ST-I
      1 Copia-43_ATr-I
      1 Copia-43_Pru-I
      1 Copia-45_ALY-I
      8 Copia-45_RC-I
      1 Copia-47_ALY-I
      1 Copia-47_PIT-I
      1 Copia-48_SB-I
      1 Copia-49_CCri-I
      3 Copia-4_Cfl-I
      1 Copia-4_CPu-LTR
      1 Copia-4_DWil-LTR
      1 Copia-4_SMo-I
      1 Copia-51_GM-I
      1 Copia-52_SB-I
      1 Copia-58_BG-I
      1 Copia-59_CCri-I
      1 Copia-59_PT-I
      1 Copia-5_SI-I
      1 Copia-5_Trm-I
      2 Copia-65_BG-I
      1 Copia-65_MLP-I
      1 Copia-66_PPe-I
      1 Copia-66_PX-I
      3 Copia-67_CCri-I
      1 Copia-68_BG-I
      1 Copia-6_DWil-I
      1 Copia-6_ECa-I
      1 Copia-6_LH-I
      1 Copia-70_GM-I
      1 Copia-71_CCri-I
      1 Copia-76_MLP-I
      1 Copia-79_Mad-I
      3 Copia-7_ES-I
      1 Copia-7_SI-I
      2 Copia7-ZM_I-int
      1 Copia7-ZM_LTR
      1 Copia-81_MLP-I
      1 Copia-82_BRa-I
      1 Copia-84B_CCri-I
      1 Copia-85_GM-I
      1 Copia-88_CCri-I
      1 Copia-8_BRa-I
      1 Copia-8_SI-I
      1 Copia-92_ALY-I
      1 Copia-96_CCri-I
      1 Copia-96_Mad-I
      1 Copia-96_SB-I
      1 Copia-99_Mad-I
      1 Copia-9_BRa-I
      1 Copia-9_CCri-I
      1 Copia-9_ECa-I
      1 Copia-9_EPa-I
      1 Copia-9_SB-I
      2 Copia-9_SI-I
      8 COPIA-I_MT
      1 CR1-100_AAe
      1 CR1-119_AAe
      1 CR1-127_AAe
      1 CR1-16_CQ
      1 CR1-1_HMM
      1 CR1-1_IS
      1 CR1-1_LMi
      1 CR1-25_HM
      1 CR1-3_HM
      1 CR1-49_HM
      1 CR1-4_NVi
      1 CR1-50_HM
      1 CR1-52_AAe
      1 CR1-57_AAe
      1 CR1-77_AAe
      4 CR1-78_AAe
     10 CR1-79_HM
      1 CR1-7_SP
      2 CR1-80_HM
      1 CR1-84_AAe
      1 CR1_AC_1
      1 CR1_Ele15
      1 CR1_Ele17
      1 CR1_Ele19
      1 CR1_Ele37
      4 CR1_Ele9
      1 Crack-27_AAe
      2 Crack-2_SP
      7 Crypton
      1 CSINE2
      1 (CTAATAA)n
      1 (CTACTT)n
      1 (CTA)n
      2 (CTATA)n
      1 (CTATTA)n
      1 (CTATT)n
      1 (CTCACT)n
      1 (CTCA)n
      1 (CTCCA)n
      1 (CTCCCC)n
      3 (CTCC)n
      1 (CTCCT)n
      1 (CTCGACTCG)n
      3 (CTCG)n
      3 (CTCGT)n
      5 (CTC)n
      3 (CTCTCC)n
      2 (CTCTC)n
      3 (CTCTCT)n
      1 (CTCTGCC)n
     13 (CTCT)n
      1 (CTCTTC)n
      2 (CTCTTT)n
      1 (CTCTTTT)n
      1 (CTCTTTTT)n
      2 (CTGA)n
      1 (CTGATAA)n
      3 (CTGG)n
      3 (CTG)n
      1 (CTGTCT)n
      1 (CTGT)n
     64 (CT)n
      1 (CTTAA)n
      1 (CTTAAT)n
      1 (CTTCAG)n
      1 (CTTCGC)n
      1 (CTTC)n
      1 (CTTCTTCAA)n
      1 (CTTCTTCGA)n
      1 (CTTGAAT)n
      1 (CTTGGA)n
     21 (CTT)n
      1 (CTTTAT)n
      1 (CTTTCCT)n
      1 (CTTTCGG)n
      2 (CTTTC)n
      5 (CTTTCT)n
      5 (CTTT)n
      1 (CTTTTC)n
      3 (CTTTT)n
      5 (CTTTTT)n
      1 (CTTTTTT)n
      1 CYCLO
      7 Daphne-18_HM
      1 Daphne-25_LMi
      1 Daphne-2_CTe
      1 Daphne-3_HMM
      1 Daphne-42_LMi
      1 Daphne-44_LMi
      1 Daphne-55_LMi
      1 Daphne-73_HMa
      2 Daphne-7_HMM
      1 DERV2a_I-int
      1 DIRS-10_CCri
      1 DIRS-11_CCri
      1 DIRS-17B_CPB
      1 DIRS-1_SSa
      1 DIRS-20_XT
      1 DIRS-28_ACar
      2 DIRS-2_MLP-I
      1 DIRS-4_ACar
      1 DIRS-4_DR
      1 DIRS-5_CCri
      2 DIRS-5_SP
      1 DIRS-6_DR
      1 DIRS-8B_DR
      1 DIRS-8_DR
      2 DIVER_I-int
      1 DM176
      1 DM297_I-int
      1 DMRT1A
      1 DOC5_DM
      1 Eri-2B2_EE
      1 ERV1-1_AMi-I
      1 ERV1-1_PCa-I
      3 ERV1-1_SSc-I
      1 ERV1-2_ACar-I
      1 ERV12_MD_I-int
      2 ERV1-7_DR-I
      1 ERV1-N5-I_DR
      1 ERV1-N7-I_DR
      1 ERV2-3b_CPo-I
      1 ERV2-3_Tbel_I-int
      1 ERV2-4_EE-I
      1 ERV2-4_FCa-I
      1 ERV3-2_AMi-I
      1 ERV-3_AMi-I
      1 ERV-3B_LCh-I
      1 ERV3_DR-I
      1 ERV-3_PM-I
      1 ERVB2_1-I_MM
      1 ETnERV3-int
      3 G4_DM
      1 G6_DM
      1 (GAAAACGAAA)n
      3 (GAAAA)n
      1 (GAAAGA)n
      3 (GAAA)n
      1 (GAAATAAAT)n
      1 (GAAAT)n
      1 (GAACA)n
      1 (GAACGC)n
      2 (GAACG)n
      7 (GAAC)n
      1 (GAACTTG)n
      1 (GAAGAAAAGA)n
      1 (GAAGA)n
      1 (GAAGATC)n
      1 (GAAGAT)n
      1 (GAAGCG)n
      1 (GAAGGTTTT)n
      1 (GAAG)n
      1 (GAAGTGG)n
      1 (GAAGTTA)n
      1 (GAAGTTT)n
     19 (GAA)n
      1 (GAATAA)n
      1 (GAATA)n
      1 (GAATATT)n
      2 (GAATC)n
      1 (GAATGAA)n
      1 (GAATGT)n
      3 (GAAT)n
      1 (GAATTAA)n
      1 (GAATT)n
      1 (GAATTTGG)n
      1 (GAATTT)n
      1 (GAATTTT)n
      1 (GACAATT)n
      1 (GACCC)n
      1 (GACCGTG)n
      1 (GACGAAG)n
      1 (GACGAG)n
      1 (GACGA)n
      3 (GACGC)n
      1 (GACGGC)n
      1 (GACGGCT)n
      3 (GACG)n
      9 (GAC)n
      1 (GACTC)n
      1 (GACTT)n
      1 (GAGAAAGA)n
      1 (GAGAAC)n
      1 (GAGAAT)n
      1 (GAGACA)n
      2 (GAGAC)n
      1 (GAGAGACTC)n
      1 (GAGAGC)n
      2 (GAGA)n
      1 (GAGATTT)n
      1 (GAGCCC)n
      1 (GAGCGA)n
      1 (GAGCG)n
      9 (GAGC)n
      1 (GAGGAGC)n
      1 (GAGGCA)n
      5 (GAGGC)n
      1 (GAGG)n
      6 (GAG)n
      1 (GAGTAC)n
      1 (GAGT)n
    120 (GA)n
    317 GA-rich
      1 (GATAA)n
      1 (GATAATC)n
      1 (GATAATT)n
      2 (GATA)n
      1 (GATATAA)n
      1 (GATATA)n
      1 (GATATTT)n
      1 (GATCCC)n
      1 (GATCGCG)n
      2 (GATC)n
      2 (GATCTAT)n
      1 (GATCTC)n
      1 (GATCTT)n
      1 (GATGCGG)n
      1 (GATGCG)n
      1 (GATGC)n
      2 (GATGGA)n
      1 (GATGG)n
      1 (GATG)n
      3 (GAT)n
      1 (GATTCAA)n
      1 (GATTC)n
      1 (GATTCTA)n
      1 (GATTGAA)n
      1 (GATTG)n
      1 (GATTTT)n
      1 (GCAA)n
      1 (GCACC)n
      1 (GCACGAT)n
      1 (GCACGC)n
      2 (GCAC)n
      1 (GCACT)n
      1 (GCAGAA)n
      1 (GCAGAGGCAG)n
      1 (GCAGC)n
      4 (GCA)n
      1 (GCATC)n
      1 (GCATG)n
      1 (GCCCCC)n
      1 (GCCCGCG)n
      1 (GCCCTCT)n
      1 (GCCGA)n
      1 (GCCGC)n
      1 (GCCGGC)n
      1 (GCCGG)n
      2 (GCCG)n
     15 (GCC)n
      1 (GCCTC)n
      1 (GCCTGCC)n
      2 (GCCT)n
      1 (GCGAAC)n
      1 (GCGAA)n
      3 (GCGAC)n
      1 (GCGAGAG)n
      1 (GCGAGA)n
      1 (GCGAGC)n
      2 (GCGAG)n
     13 (GCGA)n
      2 (GCGCC)n
      1 (GCGCGA)n
      1 (GCGCGC)n
      2 (GCGCG)n
      2 (GCGC)n
      3 (GCGCTC)n
      1 (GCGCT)n
      1 (GCGGACTC)n
      3 (GCGGA)n
      1 (GCGGCC)n
      1 (GCGGCG)n
      6 (GCGGC)n
      1 (GCGGG)n
      2 (GCGGTG)n
     23 (GCG)n
      2 (GCGTCG)n
      2 (GCGTC)n
      1 (GCGTGTATA)n
      6 (GCGT)n
     24 (GC)n
      2 (GCTCGC)n
      8 (GCTC)n
      1 (GCTCTC)n
      2 (GCTG)n
      4 (GCT)n
      2 (GCTTTTT)n
      2 (GGAAA)n
      2 (GGAA)n
      1 (GGAATATA)n
      2 (GGAC)n
      1 (GGAGAAT)n
      1 (GGAGGAGC)n
      1 (GGAGTG)n
      1 (GGAGTTG)n
      7 (GGA)n
      1 (GGCACGC)n
      1 (GGCCC)n
      1 (GGCC)n
      5 (GGCGA)n
      1 (GGCGCG)n
      1 (GGCGGAT)n
      1 (GGCGGCGG)n
      1 (GGCGGCG)n
      1 (GGCGT)n
     20 (GGC)n
      1 (GGCTC)n
      2 (GGCT)n
      1 (GGCTT)n
      1 (GGGAAC)n
      1 (GGGAAGA)n
      1 (GGGAA)n
      1 (GGGCG)n
      1 (GGGTCGC)n
      1 GGLTR7_I
      1 (GGTAGC)n
      2 (GGTGGC)n
      8 (GGT)n
      2 (GGTT)n
     15 Ginger1
      1 Ginger2
     24 (G)n
     42 G-rich
      1 (GTAAAA)n
      2 (GTAA)n
      1 (GTAAT)n
      1 (GTACA)n
      1 (GTAG)n
      1 (GTAGTT)n
      2 (GTA)n
      1 (GTATAT)n
      1 (GTATGA)n
      1 (GTAT)n
      1 (GTATT)n
      1 (GTATTT)n
      1 (GTCC)n
      1 (GTCGAC)n
      2 (GTCGA)n
      1 (GTCGCC)n
      2 (GTCGC)n
      1 (GTCGCT)n
      1 (GTCGGA)n
      1 (GTCGG)n
      1 (GTCG)n
      1 (GTCGT)n
     11 (GTC)n
      1 (GTCTCC)n
      3 (GTCTC)n
      1 (GTCTTT)n
      1 (GTGAGT)n
      1 (GTGATA)n
      1 (GTGGC)n
      1 (GTG)n
      1 (GTGTACGT)n
      1 (GTGT)n
     11 (GT)n
      1 (GTTAAC)n
      1 (GTTAT)n
      1 (GTTATTT)n
      3 (GTTC)n
      1 (GTTCTCC)n
      1 (GTTGC)n
      1 (GTTGGAC)n
      1 (GTTGT)n
      6 (GTT)n
      1 (GTTTACA)n
      1 (GTTTCAAA)n
      1 (GTTTCG)n
      1 (GTTTC)n
      1 (GTTTCTA)n
      1 (GTTTTTG)n
      1 (GTTTTT)n
      1 GYPSHAN_I_MT_
      1 GYPSI_I-int
      2 GYPSM1_I-int
      1 Gypsy-10_ATr-I
      3 Gypsy-10_CFl-I
      1 Gypsy-10_DTa-I
      1 Gypsy-10_HMM-I
      1 Gypsy10-I_DR
      1 Gypsy-10_LBS-I
      1 Gypsy10-LTR_SP
      2 Gypsy10-NVi_I-int
      1 Gypsy-10_SCH-I
      1 Gypsy-110_DR-I
      1 Gypsy-113_AA-I
      1 Gypsy-113_MLP-I
      1 Gypsy-118_GM-I
      1 Gypsy-119_GM-I
      1 Gypsy-11_CCO-I
      1 Gypsy-11_SI-I
      1 Gypsy120-LTR_DR
      1 Gypsy-120_SB-I
      1 Gypsy-122_MLP-I
      1 Gypsy-125_MLP-I
      1 Gypsy-126_GM-LTR
      1 Gypsy-127_AA-LTR
      1 Gypsy-128_GM-I
      1 Gypsy-12_ATr-LTR
      1 Gypsy-12_CFl-I
      2 Gypsy-12_CGi-I
      1 Gypsy-12_CSa-LTR
      1 Gypsy-12_LH-I
      1 Gypsy-12_Mad-I
      1 Gypsy-12_PAb-I
      2 Gypsy-12_PBa-I
      1 Gypsy135-I_DR
      1 Gypsy-137_SBi-I
      1 Gypsy-13_Mad-I_
      5 Gypsy-13_PBa-I
      1 Gypsy13-PTR_I-int
      1 Gypsy-13_SMo-LTR
      1 Gypsy146-I_DR
      1 Gypsy-14_CFl-I
      2 Gypsy-14_DAn-I
      1 Gypsy14-LTR_Dpse
      1 Gypsy-14_PBa-I
      1 Gypsy-14_PGr-I
      1 Gypsy157-I_DR
      1 Gypsy-15_ATr-I
      1 Gypsy15-I_Dya
      1 Gypsy15-I_SP
      1 Gypsy-164_AA-I
      1 Gypsy-16_Crp-I
      2 Gypsy-16_GA-I
      1 Gypsy-16_LH-I
      1 Gypsy-16_LVa
      1 Gypsy-171_ZM-I
      1 Gypsy172-I_Dr
      1 Gypsy-173_DR
      1 Gypsy-174_AA-I
      1 Gypsy-178_AA-I
      1 Gypsy-17_DWil-I
      1 GYPSY17-I_AG
      1 Gypsy-17_JC-I
      3 Gypsy-17_LH-I
      2 Gypsy-17_PBa-I
      1 Gypsy-17_PR-I
      1 Gypsy-17_RC-I
      1 Gypsy-17_SI-I
      1 Gypsy-17_TC-I
      1 Gypsy-180_DR-I
      1 Gypsy-185_DR-I
      1 Gypsy-189_AA-I
      1 Gypsy-189_ZM-I
      1 Gypsy18-I_Dpse
      1 Gypsy-18-I_XT
      2 Gypsy-18_LH-I
      1 Gypsy-18_OD-I
      2 Gypsy-18_PBa-I
      1 Gypsy18-PTR_I_
      4 Gypsy-18_SI-I
      1 Gypsy-190_AA-I
      1 Gypsy-193_DR-I
      1 Gypsy-19_BD-I
      1 Gypsy-19_DAn-I
      1 Gypsy-19_GA-I
      1 Gypsy-19_OD-I
      1 Gypsy-19_PBa-I
      1 Gypsy-1_AA-I
      1 Gypsy-1_BT-I
      3 Gypsy-1_Cfl-I
      1 Gypsy-1_CMe-I
      2 Gypsy-1_DFi-I
      1 Gypsy1-I_Dmoj
      1 Gypsy-1_LG-I
      1 Gypsy-1_SCH-I
      1 Gypsy1-SM_LTR
      1 Gypsy1-VV_I_
      1 Gypsy-20_Adi-I
      1 Gypsy-20_ALY-I
      1 Gypsy-20-I_NV
      1 Gypsy20_ZM_I-int
      1 Gypsy-213_AA-I
      1 Gypsy-21_LBS-I
      1 Gypsy-21_LH-I
      1 Gypsy-21_MLP-I
      1 Gypsy-228_AA-I
      1 Gypsy-22_DWil-I
      1 Gypsy-22_LMi-I
      1 Gypsy-237_AA-I
      1 Gypsy-23_AA-I
      1 Gypsy-23-I_SP
      1 Gypsy-246_AA-I
      1 Gypsy-24_ALY-I
      1 Gypsy-24_CQ-I
      1 Gypsy-24_DAn-I
      4 Gypsy-24_DEl-I
      2 Gypsy-24_LH-I
      1 Gypsy-24_PBa-I
      1 Gypsy-24_SI-I
      1 Gypsy-24_SSa-I
      1 Gypsy-256_AA-I
      1 Gypsy-25_LBS-I
      1 Gypsy-25_LH-LTR
      1 Gypsy-25_SP-I
      2 Gypsy-26-I_NVi
      1 Gypsy-26_Mad-LTR
      1 Gypsy-26_PSo-I
      1 Gypsy-26_TC-LTR
      1 Gypsy-272_AA-I
      1 Gypsy-27_LBS-I
      1 Gypsy-27_SP-I
      1 Gypsy-284_AA-I
      1 Gypsy-28_DEl-LTR
      1 Gypsy-28_PIT-I
      1 Gypsy-291_AA-I
      1 Gypsy-29-I_DR
      1 Gypsy-2_AM-I
      1 Gypsy-2_Cfl-I
      1 Gypsy-2_DAn-I
      3 Gypsy-2_DEl-I
      1 Gypsy-2_DRh-I
      2 Gypsy2-I_DM
      1 Gypsy-2_MLP-I
      1 Gypsy-2_Pru-I
      1 Gypsy-2_TC-LTR
      1 Gypsy-30_PTr-LTR
      1 Gypsy-30_SSa-I
      1 Gypsy-31-I_NVi
      2 Gypsy-31-LTR_DR
      1 Gypsy-33_CGi-I
      1 Gypsy-34_DEl-I
      2 Gypsy-36_Adi-I
      1 Gypsy-36_Mad-I
      1 Gypsy-37_ATr-LTR
      1 Gypsy-37_DEl-I
      1 Gypsy-38_Mad-I
      3 Gypsy-38_NVi-LTR
      1 Gypsy-39_DPu-I
      1 Gypsy-3_AA-I
      1 Gypsy-3_AA-LTR
      1 Gypsy-3_Adi-I
      1 Gypsy-3_AEc-I
      1 Gypsy-3_BG-I
      1 Gypsy-3_CPu-I
      1 Gypsy-3_DPu-I
      1 Gypsy3-I_Dmoj
      1 Gypsy-3_PMar-I
      1 Gypsy-40_Mad-I
      1 Gypsy-41_CQ-I
      1 Gypsy41-I_DR
      1 Gypsy-41_Mad-I
      1 Gypsy-42_CCri-I
      1 Gypsy-42_MLP-I
      1 Gypsy-42_OD-I
      1 Gypsy-43_LMi-I
      1 GYPSY44-I_AG
      1 Gypsy-45_STu-I
      1 Gypsy-46_CCri-I
      1 Gypsy-46_MLP-I
      1 Gypsy-47_BD-I
      1 Gypsy-47_DEl-I
      1 Gypsy-49_BG-I
      1 Gypsy49-I_DR
      1 Gypsy-4_ACe-I
      1 Gypsy-4_BM-I
      3 Gypsy-4_CFl-I
      1 Gypsy-4_HV-I
      1 GYPSY4-I_AG
      1 Gypsy4-LTR_DR
      2 Gypsy-4_PBa-I
      1 Gypsy-4_PR-I
      1 Gypsy-50_LMi-I
      1 Gypsy-51_CGi-I
      1 Gypsy-51_LMi-I
      1 Gypsy-53_DWil-I
      1 Gypsy-54_CQ-I
      1 Gypsy-54_SB-I
      1 Gypsy-56_BG-I
      1 Gypsy-57_DWil-I
      1 Gypsy-58_DWil-I
      1 Gypsy-59_CGi-I
      1 Gypsy-59_DWil-I
      1 Gypsy-59_PIT-I
      1 Gypsy-5_Ano-LTR
      1 Gypsy-5_CCO-I
      1 Gypsy-5_GM-I
      1 Gypsy-5_IS-I
      1 Gypsy-5_PGr-I
      1 Gypsy-5_PR-I
      1 Gypsy-5_PX-I
      1 Gypsy-5_TCa-I
      6 Gypsy-600_AA-I
      1 Gypsy-605_AA-I
      1 Gypsy60-I_DR
      1 Gypsy-60_PIT-I
      1 Gypsy-61_GA-I
      1 Gypsy-62_BG-LTR
      1 Gypsy-63_AA-I
      1 Gypsy-63_CGi-I
      1 Gypsy-63_CQ-I
      1 Gypsy-64_BG-I
      1 Gypsy-64_DWil-I
      1 Gypsy-65_CCri-I
      1 Gypsy-66_AA-I
      1 GYPSY66-I_AG
      2 GYPSY68-I_AG
      1 Gypsy-68_PAb-LTR
      1 Gypsy-69_PAb-I
      1 Gypsy-6_AEc-I
      1 Gypsy-6_BM-I
      2 Gypsy-6_CFl-I
      1 Gypsy6-I_AP
      1 GYPSY6-I_CB
      1 Gypsy6-I_Dmoj
      2 Gypsy6-I_SP
      1 Gypsy-6_MLP-I
      1 Gypsy-70_CGi-I
      1 Gypsy-70_LMi-I
      1 Gypsy-72_AA-I
      1 Gypsy-72_CCri-LTR
      1 Gypsy-72-LTR_ZM
      1 Gypsy-73_GM-I
      1 Gypsy73-I_DR
      1 Gypsy-74_PM-I
      1 Gypsy75-I_DR
      1 Gypsy-76_MLP-I
      1 Gypsy-7_CFl-I
      1 Gypsy-7_CP-I
      1 Gypsy-7_DRh-I
      1 Gypsy-7-I_XT
      6 Gypsy-7_LH-I
      2 Gypsy7-LTR_DR
      1 Gypsy7-NVi_I-int
      2 Gypsy-7_PBa-I
      1 Gypsy-7_SLL-I
      1 Gypsy-7_TCa-I
      1 Gypsy7-VV_I_
      1 Gypsy81-I_Dr
      1 Gypsy-82_CCri-I
      1 Gypsy-83_CCri-I
      1 Gypsy-84_MLP-I
      1 Gypsy-85_CQ-I
      1 Gypsy-86_CQ-LTR
      1 Gypsy-86_GM-I
      1 Gypsy-87_SB-I
      1 Gypsy-8_ALY-I
      1 Gypsy-8_DTa-I
      2 Gypsy8-I_Dpse
      1 Gypsy-94_CQ-I
      1 Gypsy-97_CQ-I
      1 Gypsy-9_CGi-I
      1 Gypsy-9_DPu-I
      1 Gypsy-9_DTa-I
      1 Gypsy9-NVi_I-int
      3 Gypsy-9_PBa-I
      1 Gypsy-9_SCH-I
      1 Gypsy-9_XT-I
      4 GYPSY-I_MT
      1 HAL1-4_Cho
    148 hAT
      2 HE2_DR
     43 Helitron
      1 HELMET2_
      1 HELMET3_
      1 HERO-9_HR
      1 HERV49I-int
      1 HeT-A3_DVi
      1 HMSBEAGLE_I-int
      4 HOPEBm2
      1 HUCK1-I_ZM
      1 I-1_AA
      1 I-1_AF
      1 I-1_CH
      1 I-1_CQ
      1 I-1_DF
      1 I-1_NVi
      1 I-1_SP
      1 I-3_DR
      1 I-4_DBp
      1 I-51_AAe
      1 I-6_AAe
      1 I-77_AAe
      1 I-7B_AAe
      1 I-80_AAe
      1 IAP5-Mm_I-int
      1 I_Ele10
      1 I_Ele18
      1 I_Ele2
      1 I_Ele28
      1 I_Ele4D_AAe
      1 I_Ele4G_AAe
      7 ISL2EU
      1 Jockey-11B_DBp
      1 Jockey-13_DBp
      1 Jockey-1_DAn
      1 Jockey-1_DSe
      1 Jockey-1_LVa
      1 Jockey-2_DEl
      2 Jockey-2_DGri
      1 Jockey-3_DGri
      2 Jockey-3_DK
      1 Jockey-3_DVi
      2 Jockey-4_Hmel
      1 Jockey-5_DK
      1 Jockey-5_DTa
      1 Jockey-6_DF
      1 Jockey-6_DPer
      1 Jockey-6_Hmel
      2 Jockey-7_DEu
      1 Jockey-8_DF
      2 Jockey_Ele8
      1 Keno-1_SSa
      1 KenoDr1
      1 Kiri-23_AAe
      1 Kiri-26_AAe
      1 Kiri-6_AAe
    133 Kolobok
      1 L1-10_CPa
      1 L1-11_DR
      1 L1-15_CPa
      1 L1-19_FV
      1 L1-1_ALy
      2 L1-1_ECa
      1 L1-1_STu
      1 L1-1_TC
      1 L1-1_ZM
      1 L1-20_SSa
      1 L1-24_CPa
      1 L1-27_SSa
      1 L1-27_XT
      1 L1-29_ATr
      1 L1-2_EPa
      1 L1-2_FR
      2 L1-2_FV
      1 L1-2_HM
      1 L1-36_ACar
      1 L1-3A_ME
      1 L1-40B_ACar
      1 L1-47_DR
      1 L1-55_XT
      2 L1-58_ACar
      1 L1-5A2_EC
      2 L1-82_DR
      1 L1-8_ECa
      1 L1-97_Cis
      1 L1_Ele3
      1 L1-N1_FV
      1 L1SU_SP
      1 L2-12_CTe
      1 L2-19_CTe
      1 L2-1_HSal
      1 L2-1_SSa
      1 L2-24_NV
      1 L2-5_CTe
      1 L2B-4B_AAe
      1 L2_Plat1b
      1 Lian-Aa1
      1 LIN14_SM
      2 LIN9_SM
      1 LINE1-14_ZM
      1 LINE1-1_ZM
      2 LINE1-23_SBi
      1 LINE1-29_SBi
      1 LINE1-54_SBi
      1 LINE1-58_SBi
      1 LINE-1_AA
      1 LINE2A_CB
      1 LINE-3
      2 Loa-1B_DT
      1 Loa-1_DRh
      1 LTR10A2_SS
      1 LTR11
      1 LTR-12B1_Crp
      1 LTR-12D_Crp
      1 LTR-12D_Gav
      1 LTR135_MD
      1 LTR13_FC
      1 LTR15D_OC
      1 LTR-1_GA-I
      1 LTR-1_Mad
      2 LTR-2_Mad-I
      1 LTR-2_MX-LTR
      1 LTR39A2_SSc
      1 LTR49_MD
      1 LTR5_Str
      1 LTR73_EC
      1 LX10
     38 Maverick
      1 MEG-T2
      8 MER30_
     36 Merlin
      1 MINIME_DN
      1 MinoAg1
      1 Mirage
      1 MLTR25C
      1 MtPH-A6-1-Ia_
      1 MtPH-D-Ia_
     36 MuDR
      2 MuDr6_MT_
      1 MUSID5
      5 Nematis_Cr
      2 Neptune3_Ren
      1 Neptune_Hyd
      7 NeSL-1_CBri
      1 Nimb-16_LMi
      1 Nimb-1_CTe
      1 Nimb-2_CQ
      1 NUSIF1_TM
      1 Ogre-SD1_I-int
      1 Outcast_Ele3
     10 P
      2 Penelope-12_HM
      2 Penelope-13_HM
      1 Penelope-15_LMi
      5 Penelope-1_DR
      1 Penelope-1_LCh
      1 Penelope-22_LMi
      1 Penelope-2_CQ
      4 Penelope-2_PBa
      4 Penelope-3_SIn
      1 Penelope-6_LMi
      1 Penelope-80_LMi
      1 Penelope-83_LMi
     27 PIF-Harbinger
    293 PiggyBac
      1 Poseidon_Ac
      1 PREM1A_ZM_LTR
      1 PREM2_ZM_I-int
      1 Proto2-1_LVa
      1 Proto2-1_SK
      1 Proto2-4_CTe
      1 pSIVgml-I
      1 PtPineywoods_I-int
      1 R1
      1 R1-11_DWi
      6 R1-1_AEc
      1 R1-1_CFl
      1 R1-1_DVi
      2 R1-1_HSal
      4 R1-1_SIn
      4 R1-2_DGr
      2 R1-2_DK
      3 R1-2_PBa
      1 R1-2_SIn
      1 R1-3B_DEl
      2 R1-3_SIn
      2 R1-5_BM
     17 R1A_NVi
     13 R1B_DAn
     35 R1B_NVi
      2 R1C_NLo
      6 R1C_NVi
      2 R1_DPs
      1 R1_DSi
      4 R1_DVi
      1 R1_DYa
      3 R1_SC
      3 R2-1_SM
      5 R2Amel
      1 R2B_NVi
      1 R2CIA_CI
      1 R2_DA
      3 R2_DAn
      1 R2_DM
      2 R5-1_SM
      1 R6Ag1
      2 RAGYPSY3_LTR_MT
      3 RAGYPSY4_LTR_MT
      1 RAM13_I_MT_
      1 RAM4_I_
      2 RAM9B_LTR_
      1 Rex1-31_DRe
      1 Rex1-40_DRe
      1 Rhin-1
      1 RILN8_OS
      1 RLG_scMaximus_3_1-I
      1 RLG_scTat_3_1-I
      1 RLG_scTat_7_1-I
      2 RLTR34_MM
      1 RLTR42_I
      1 RLTR51A_Mm
      1 RMER12
      1 RMER12C
      1 RPS2
      1 RSINE2
      5 RTAg4
      1 RTE-18_CPB
      1 RTE-1C_DAn
      1 RTE-1_SBi
      1 RTE-2_BM
      1 RTE-48_LMi
      1 RTE-4_LCh
      1 RTE_Ele4
      1 RTEX-10_BF
      1 RTEX-2_ACar
      1 RTEX-2_CGi
      1 RTEX-2_PBa
      1 RTEX-3_VC
      1 RTEX-7_SK
      1 Sake2_BM
      3 SART1
      6 SART-1_CF
      1 SART-1_MOc
      1 SART1_R1_Hmel
      1 SART-4_MOc
      1 SARTBm3
      1 SARTPx1
      1 SARTTc3
      4 SARTTc5
      1 SARTTc8
      1 SFV1-17_AMi-I
      1 SFV1-23_Gav-I
      1 SHACOP20_I_MT-int
      1 SHALINE7_MT
      1 SHALINE8_MT
      1 SHALINE9_MT_
      1 SINE2_Gav
      1 SKIPPER_I-int
      1 SLACS
     11 Sola
      1 SR2A
      1 STRID1
      1 SZ-10_I-int
      1 SZ-36LTR
      2 (TAAAA)n
      9 (TAAA)n
      1 (TAAAT)n
      1 (TAACAA)n
      1 (TAACAAT)n
      1 (TAACACG)n
      1 (TAACAGA)n
      1 (TAACA)n
      1 (TAACATA)n
      1 (TAACG)n
      1 (TAAC)n
      1 (TAACTC)n
      1 (TAACTT)n
      1 (TAAGG)n
      2 (TAAG)n
      1 (TAAGT)n
     72 (TAA)n
      1 (TAATAAG)n
      3 (TAATAA)n
      1 (TAATAG)n
     12 (TAATA)n
      3 (TAATATA)n
     10 (TAATAT)n
      3 (TAATATT)n
      1 (TAATCA)n
      3 (TAATGA)n
      1 (TAATG)n
      1 (TAATGTG)n
      2 (TAATGT)n
     12 (TAAT)n
      3 (TAATTAA)n
      1 (TAATTAATT)n
      5 (TAATTA)n
      2 (TAATTAT)n
      1 (TAATTC)n
     10 (TAATT)n
      1 (TAATTTA)n
      1 (TAATTTC)n
      1 (TAATTTG)n
      5 (TAATTT)n
      1 (TACAATA)n
      1 (TACAGA)n
      2 (TACA)n
      3 (TACATT)n
      1 (TACCCGT)n
      1 (TACC)n
      2 (TACGAT)n
      1 (TACGT)n
      2 (TAC)n
      1 (TACTAAG)n
      1 (TACTAA)n
      2 (TACTA)n
      1 (TACTAT)n
      1 (TACTATT)n
      1 (TACT)n
      2 (TACTTC)n
      1 (TACTT)n
      1 (TACTTTGGAG)n
      1 (TACTTT)n
      1 (TACTTTT)n
      1 Tad1-20_BG
      2 Tad1-4_TMe
      1 Tad1-66_BG
      1 (TAGAATT)n
      1 (TAGATAA)n
      1 (TAGATG)n
      1 (TAGAT)n
      1 (TAGATT)n
      1 (TAGC)n
      1 (TAGGAA)n
      1 (TAGGA)n
      1 (TAGGC)n
      3 (TAG)n
      2 (TAGTA)n
      1 (TAGTGAG)n
      3 (TAGT)n
      1 (TAGTTA)n
      1 (TAGTTAT)n
      1 (TAGTTCT)n
    112 (TA)n
      1 TART-A
      4 TART_DV
      1 (TATAACA)n
     14 (TATAA)n
      1 (TATAATAA)n
      1 (TATAATA)n
      1 (TATAATC)n
      5 (TATAAT)n
      2 (TATAATT)n
      1 (TATACA)n
      1 (TATACAT)n
      1 (TATAGAA)n
      1 (TATAGTA)n
     10 (TATA)n
      1 (TATATAAAAC)n
      5 (TATATAA)n
      2 (TATATACA)n
      4 (TATATA)n
      1 (TATATAT)n
      1 (TATATATT)n
      1 (TATATC)n
      1 (TATATGCG)n
      3 (TATATG)n
     20 (TATAT)n
      1 (TATATTA)n
      1 (TATATTC)n
      1 (TATATTG)n
      7 (TATATT)n
      1 (TATCTAG)n
      2 (TATGAT)n
      1 (TATGATT)n
      1 (TATGCA)n
      2 (TATG)n
      1 (TATGTA)n
      1 (TATGT)n
      1 (TATGTT)n
     56 (TAT)n
      7 (TATTAA)n
      3 (TATTAAT)n
      1 (TATTACA)n
      3 (TATTAC)n
      1 (TATTAG)n
     13 (TATTA)n
      6 (TATTATA)n
      1 (TATTATCAT)n
      1 (TATTATG)n
      4 (TATTAT)n
      2 (TATTC)n
      2 (TATTCTA)n
      1 (TATTCTATTT)n
      1 (TATTCTC)n
      2 (TATTGAA)n
      1 (TATTGAG)n
      2 (TATTGA)n
      2 (TATTG)n
      2 (TATTGT)n
     22 (TATT)n
      6 (TATTTAA)n
      8 (TATTTA)n
      5 (TATTTAT)n
      2 (TATTTGA)n
      1 (TATTTG)n
     17 (TATTT)n
      2 (TATTTTA)n
      3 (TATTTT)n
    641 Tc1-Mariner
      1 (TCAAACA)n
      1 (TCAAATAT)n
      1 (TCAAGAC)n
      1 (TCAATCA)n
      1 (TCAAT)n
      1 (TCAATTA)n
      1 (TCAATTC)n
      2 (TCAATT)n
      1 (TCACAC)n
      1 (TCACAT)n
      1 (TCAGAT)n
      1 (TCAG)n
      1 (TCAGTTT)n
      2 (TCA)n
      1 (TCATC)n
      1 (TCATGTT)n
      1 (TCAT)n
      1 (TCATTC)n
      2 (TCATT)n
      1 (TCATTTGA)n
      1 (TCATTT)n
      1 (TCCAAAGT)n
      1 (TCCAGA)n
      1 (TCCAGTA)n
      1 (TCCCC)n
      1 (TCCCCT)n
      1 (TCCC)n
      1 (TCCGA)n
      1 (TCCG)n
      1 (TCCGT)n
      7 (TCC)n
      1 (TCCTAT)n
      1 (TCCTCCC)n
      1 (TCCTCTC)n
      1 (TCCTCT)n
      3 (TCCTGGGCTA)n
      1 (TCCT)n
      1 (TCCTTC)n
      2 (TCCTT)n
      1 (TCGAAGA)n
      1 (TCGAA)n
      1 (TCGAC)n
      1 (TCGAGTT)n
      2 (TCGA)n
      2 (TCGATC)n
      1 (TCGCCC)n
      2 (TCGCC)n
      1 (TCGCGA)n
      3 (TCGCG)n
      7 (TCGC)n
      1 (TCGGA)n
      1 (TCGGCGA)n
      1 (TCGGCG)n
      2 (TCGGC)n
      1 (TCGG)n
      1 (TCGGTTA)n
      6 (TCG)n
      1 (TCGTACT)n
      1 (TCGTA)n
      1 (TCGT)n
      2 (TCGTT)n
     73 (TC)n
      1 (TCTAA)n
      1 (TCTACAA)n
      1 (TCTACA)n
      1 (TCTACAT)n
      1 (TCTATT)n
      1 (TCTCCC)n
      1 (TCTCCCT)n
      1 (TCTCC)n
      2 (TCTCCT)n
      1 (TCTCGCTC)n
     12 (TCTC)n
      1 (TCTCTA)n
      3 (TCTCTC)n
      1 (TCTCTG)n
      1 (TCTCT)n
      1 (TCTCTTG)n
      3 (TCTCTT)n
      1 (TCTGCT)n
      2 (TCTG)n
      1 (TCTGTC)n
      1 (TCTGTT)n
     15 (TCT)n
      1 (TCTTCCT)n
      1 (TCTTC)n
      2 (TCTTCT)n
     10 (TCTT)n
      1 (TCTTTCA)n
      3 (TCTTT)n
      1 (TCTTTT)n
      1 TF2_I-int
      1 (TGAACT)n
      1 (TGAAGA)n
      1 (TGAAGCG)n
      1 (TGAA)n
      1 (TGAATA)n
      1 (TGAATAT)n
      2 (TGAAT)n
      1 (TGAATT)n
      1 (TGAATTT)n
      6 (TGA)n
      1 (TGATAA)n
      1 (TGATAATT)n
      1 (TGATG)n
      1 (TGATT)n
      1 (TGCAACG)n
      1 (TGCGA)n
      1 (TGCGCAA)n
      4 (TGCG)n
      4 (TGC)n
      1 (TGCT)n
      1 (TGGAAATT)n
      1 (TGGAGG)n
      1 (TGGAGTT)n
      1 (TGGCA)n
      2 (TGGC)n
      3 (TGG)n
      1 (TGGTAT)n
      1 (TGGTGC)n
     13 (TG)n
      1 (TGTAATG)n
      1 (TGTAAT)n
      1 (TGTACA)n
      1 (TGTAGA)n
      2 (TGTA)n
      1 (TGTATAT)n
      1 (TGTATCT)n
      2 (TGTAT)n
      1 (TGTATTT)n
      1 (TGTCACG)n
      1 (TGTCCA)n
      4 (TGTC)n
      1 (TGTCTC)n
      8 (TGT)n
      1 (TGTTAT)n
      1 (TGTTGC)n
      1 (TGTTTTG)n
      1 (TGTTTTT)n
      1 TguERV3_I-int
      1 TguERV4_I-int
      1 TguLTRL2a8
      1 TIRANT_I-int
     29 (T)n
     18 Transib
      3 (TTAAA)n
      1 (TTAAC)n
      1 (TTAAGAA)n
      1 (TTAAGCA)n
     18 (TTAA)n
      1 (TTAATAAG)n
      2 (TTAATAA)n
      6 (TTAATA)n
      2 (TTAATAT)n
      1 (TTAATGA)n
      1 (TTAATG)n
      4 (TTAAT)n
      1 (TTAATTG)n
      2 (TTAATT)n
      2 (TTAATTT)n
      1 (TTACAAT)n
      1 (TTACAGT)n
      3 (TTACA)n
      1 (TTACATCT)n
      1 (TTACATT)n
      1 (TTAC)n
      1 (TTACTAA)n
      1 (TTACTT)n
      1 (TTAGA)n
      1 (TTAGATA)n
      1 (TTAGAT)n
      1 (TTAGATT)n
      1 (TTAGGTA)n
      1 (TTAGGT)n
      2 (TTAGTA)n
     62 (TTA)n
      1 (TTATAAC)n
      5 (TTATAA)n
      3 (TTATAAT)n
      1 (TTATAC)n
      1 (TTATAGA)n
      1 (TTATAG)n
     10 (TTATA)n
      1 (TTATATA)n
      4 (TTATAT)n
      2 (TTATATT)n
      1 (TTATCG)n
      3 (TTATG)n
     28 (TTAT)n
      2 (TTATTA)n
      2 (TTATTAT)n
      3 (TTATTC)n
      2 (TTATTG)n
      1 (TTATTGT)n
     11 (TTATT)n
      1 (TTATTTA)n
      1 (TTATTTAT)n
      3 (TTATTT)n
      1 (TTCAAATC)n
      1 (TTCAAGTC)n
      3 (TTCAA)n
      1 (TTCAATA)n
      1 (TTCAAT)n
      1 (TTCACTC)n
      1 (TTCAGA)n
      4 (TTCA)n
      1 (TTCATAA)n
      3 (TTCAT)n
      4 (TTCATT)n
      1 (TTCATTTA)n
      1 (TTCCGCG)n
      3 (TTCC)n
      1 (TTCCTAT)n
      2 (TTCCTC)n
      1 (TTCCTG)n
      1 (TTCGAA)n
      1 (TTCGAG)n
      1 (TTCGATA)n
      1 (TTCGAT)n
      1 (TTCGGCA)n
      1 (TTCGG)n
      5 (TTCG)n
      1 (TTCGTA)n
      3 (TTCGT)n
     21 (TTC)n
      1 (TTCTAA)n
      4 (TTCTA)n
      1 (TTCTATCG)n
      1 (TTCTCAT)n
      2 (TTCTCC)n
      4 (TTCTC)n
      1 (TTCTCT)n
      2 (TTCTG)n
      8 (TTCT)n
      4 (TTCTT)n
      1 (TTCTTTCC)n
      1 (TTCTTTC)n
      3 (TTCTTT)n
      1 (TTGAAGA)n
      1 (TTGAAG)n
      1 (TTGAAGT)n
      2 (TTGAA)n
      1 (TTGAAT)n
      1 (TTGA)n
      1 (TTGATAAT)n
      1 (TTGATAG)n
      1 (TTGATAGT)n
      1 (TTGATA)n
      3 (TTGAT)n
      1 (TTGC)n
      1 (TTGCT)n
      1 (TTGCTT)n
      1 (TTGGAA)n
      6 (TTG)n
      1 (TTGTATA)n
      1 (TTGTGAG)n
      2 (TTGT)n
      1 (TTGTTAA)n
      1 (TTGTTAT)n
      1 (TTGTT)n
      1 (TTGTTT)n
      1 (TT)n
      1 (TTTAACC)n
      1 (TTTAAC)n
      1 (TTTAACT)n
      1 (TTTAAGA)n
      8 (TTTAA)n
      3 (TTTAATA)n
      4 (TTTAAT)n
      1 (TTTACATC)n
      2 (TTTACTACA)n
      1 (TTTACT)n
      1 (TTTAGA)n
      1 (TTTAGCG)n
      1 (TTTAG)n
      1 (TTTAGTG)n
      1 (TTTAGTT)n
     28 (TTTA)n
      2 (TTTATAA)n
      5 (TTTATA)n
      1 (TTTATAT)n
      8 (TTTAT)n
      2 (TTTATTA)n
      1 (TTTATTC)n
      5 (TTTATT)n
      4 (TTTCAA)n
      2 (TTTCAAT)n
      3 (TTTCA)n
      1 (TTTCAT)n
      1 (TTTCATT)n
      1 (TTTCCATTAC)n
      1 (TTTCCC)n
      2 (TTTCC)n
      2 (TTTCCT)n
      1 (TTTCGA)n
      2 (TTTCG)n
     20 (TTTC)n
      1 (TTTCTAAC)n
      1 (TTTCTAA)n
      3 (TTTCTC)n
      3 (TTTCTG)n
      1 (TTTCTGT)n
      1 (TTTCT)n
      1 (TTTCTTA)n
      2 (TTTCTT)n
      1 (TTTGAAAC)n
      1 (TTTGAAAG)n
      1 (TTTGAAC)n
      1 (TTTGAGG)n
      1 (TTTGAG)n
      1 (TTTGA)n
      2 (TTTGAT)n
      2 (TTTGC)n
      5 (TTTG)n
      1 (TTTGTG)n
      1 (TTTGT)n
      1 (TTT)n
      1 (TTTTAAC)n
      2 (TTTTAA)n
      2 (TTTTAAT)n
      1 (TTTTACA)n
      1 (TTTTAC)n
     11 (TTTTA)n
      1 (TTTTATA)n
      3 (TTTTAT)n
      2 (TTTTCAA)n
      2 (TTTTCA)n
      2 (TTTTCCA)n
      1 (TTTTCCC)n
      1 (TTTTCC)n
      1 (TTTTCG)n
      5 (TTTTC)n
      2 (TTTTCT)n
      1 (TTTTGAA)n
      1 (TTTTGC)n
      1 (TTTTGTA)n
      1 (TTTT)n
      3 (TTTTTA)n
      1 (TTTTTAT)n
      1 (TTTTTG)n
      1 (TTTTTTA)n
      2 Tx1-11_CGi
      1 Tx1-11_DR
      1 Tx1-12_CGi
      2 Tx1-1_CGi
      1 Tx1-1_DR
      1 Tx1-24_DR
      2 Tx1-33_DR
      1 Tx1-3_CGi
      1 Tx1-3_PM
      1 Tx1-4_AAe
      1 Tx1-9_CGi
      1 Tx1-TGTA-1_SK
      3 U1
     37 U2
      1 U_LTR_MT_
      2 Utopia-1_AMi
      2 Utopia-1_Crp
      1 Utopia-1_Gav
      1 Ves2_ML
      1 Vingi-10_LMi
      1 Vingi-2_PM
      1 Vingi-2_SPur
      1 WIS21A_TA_I-int
      1 Zator
      1 ZFERV-2-I_DR
