# Supplementary material
Source: publisher figshare collection journal article supplement (https://gsajournals.figshare.com/ndownloader/files/13479752)
Supplement: Supplementary file 1 [file 13479752 › Nme.TE.fa]

>Helitron_comp7000_g1_i1
ATATATAGATATATAGATAATATAGAGATATGTAATATATATATACTTGCATTAAAAACT
TACTACACTGATATCTACGAGAACTTCATACGCCCGAAACGTGTCCGCCGCACACGGTCG
CGGCGGACGCGAACGTTCCGTGGCGAACGGGACGGTTATCCACGAAGTATCCGAATTCCG
GGCGCGGGAAGGCTTCCAATTCCCCGCGACGCGCGTTCCTCGAGCACCGAACTTTCTACG
TTTTTTTTTCCTTTTTCCTTTTCTTCTTCTTCTCTGTCTTTTGTTTCTTCTTAATCTTCT
ACGGTTTCTGTTTCACTCGCACTCCACCCTCTCGTTGTCTTTTTCTATTTTTCTTCTACG
TCTTTCTTCTTCTTCTTCTTCTTCTTTTTCTTCTTCTTCTTCTTCTTCT
>Helitron_comp26938_g1_i1
ATATACCGCTCTTTTCTCGTTCGCCGTGCGGAACTGGAAAATGTCTAATTAAATCATCGA
GTCCCCCATCGATTCTTATTTCTTCGTTCCTCGTGTTTCCTACTTTCGAATCCGACCCCT
TTATTAGCAGACCGTAGACATTTTTGTGCATTTATATCTCATACAGCTCTTCAGAATGGT
ATAGTATCGAAATCTATAGTACTCCATTCTCGACCGTGTTTTTAATTCACCGAAACCACC
GGTGTAGATAATTAAATTTTGTAACAGTTCGCCTCAATTTCGCTGGACATGGAAA
>LINE_comp155_g1_i1
GGCAATTACACTGGATCGTGTTTATTATACATTCATCCATTATTCTACACTTATTCTCAT
CCTTTCACGCCCAATCATTCTCTTATATTCGGGACATTCCAGGGACGTCACCGAATGGTC
GCTCTTGTTTCCACGCAGCTTGCAATTACGACAACATTCATCCTTCTTACAATCGCTCTT
TAAGTGTCCACTCATACCACACTTATGACAAACGCTCTCTTTCTCCTTGCACTCTTTGGC
CATATGCCCGAACGCACAGCATTTATGGCA
>LINE_comp384_g1_i1
GGGGCGCGACCTCCCTGCATTGCAGCATAATCGTGATATGGTCTTGGGAGGGGGGCCTAG
ACCCCCCTCCGGGACGACGGCGGCCTAAGGTTATCGCATCTGGCCAGCCGGGCCTGGGGC
AGTCGCGGTTGTTTTCTCTGAGAGTTCCCGTGGCTCCCCCTCCTGACCCAGGAAGGTCGC
CGTGGAGGTTTTAATAGATAAAAGCCCCACAGTACCTCCGACCGCTCCCCCGGGCGGTCG
GGGGTCTCTGCTTGCAGATTTTCTCCACGTTAAAAAAAAAAAATAGGTGACCCTCATCTA
TATATAAAATTTTAATCAGATACTAGTTTCGCTGTGAAGACTGTTTGCGCGACTCTAGGA
TTTGATTTTACTAATAGATCGGAAGAGCGTCGT
>LINE_comp475_g1_i1
AAAAATGTTATGGGTATTCTATATCCAACTTTGCTCAAAAACATAATAAATGATAACGGA
AAAAGAATATTTCATTCGAATTTACTAGAATTGAGTAATACTTGAATGGCTCACTTGCCA
AATCGATTAACTCCACCTTCTGGATTTTTTAAGATTTTATCGTTAAAACGCTGCGTTGAT
TCTTGACTTTTGATATTAAAAATAAATTTCCTTATTATTGGGTGTGATACCATGAAATAA
GAAAAATTCTATTGCCTATGCAAAACTTGTAATAATAAAAATTACTTCCGAGTTATACTA
TTTTACATATTTTACATATTCTTTAGATTA
>LINE_comp478_g1_i1
GGAGGAAGCGAGGAGCGGTCGCGCCGAGGAGGCGTCGACTTCTGCCTCGCGCAGCAGAAG
CGTGAGCGTGCGCCGGCGCCGCAATAGCCGCGATTCAAGTGCGGGGTCGAAGCGCCCCCG
AACGGATGAAAGTGTGAATGTGAGTGAGTGTAAAATGAGTGATGGTGATAGTGTGAAAGG
TGAACTGAATGTGTGTGCTGATTTGTGTGCTAGTGCGGTGACTGTGCGTGAGGGTGATGT
TGAAAGTGATGTGCTGAGTATGATGCGTGCGATTGGTGACCGAGTGAGAAAGTGTGTATT
GAGTGATGTGAATCGAGTGAGTAAGAGTGTGAGTGAAATAGTGTTGGGATGTATGGGTGA
ATATGAGCAGTGTGTTGTGAAATTGATGTGTGAGAATGAACGTCTAAAGGGTCGTTTGGA
TGAATGCGAAAAGCGAGAAAGTGTGAATGTGTGCAGACCCGTCCAGGGTACGAGTGCGAG
AACGTTTGCGAGTGTGATAGGAACGAAGAAAAGTGTGAATGCTAATGAGAGTGTCAGGAC
GAATGCAAGAGAGCCAGTGTTGCGTATGAGTGAGCCAAAGTTTGCGGTTGTTATAACACT
GAAGGATGAAAGTGTGCGAAGGACTAGTGAAGAGGTAAAAACGAAAGTGATGAATGAGGT
GAGCAAGTGTCTGAATGTGCGCGTGAAAGCTGTGCGGAAGACTAGGAGTGGTGGCATAGC
CGTCGAAACGGTGAGT
>LINE_comp592_g1_i1
AACCCCAAACCAAGAACACCAGACCCCCACCCATAACAATAACGGACACATCGTGCAAAA
ATACAATTAACATTATATCAAAAATAACACCCCACTTTTTCACAAAAAAAATTACAGCAA
ACAAGCATCTTTTGCACACGGAATCGGTCAGCGACTACAAAAAATCATGCGAAGCTTTAA
AAAATAGTAAAATCCAATTCTTCACATACACGCCAAAAAGCGCCAAACACATTTCTATAT
TAATGAAAGACCTCGAGGGCGATTTCGAACCAGAAATAGTCCTTGGGGAGCTACAATCAA
AAAATATCCCAAATTTAAATTTCATAGCAGTAAAAAAATTCGAAACAAAAAAATCAGCAG
CAGAAGGTAGAAAACTGCCCATCTACATAGTGCAGCTATCTCCAGACAGCAAAATTGACA
ATTTGAAACAAATTAAAGTTATTCTTCACTCCTTAGTACATTGGGAGAAAATAATAAAAA
AAGACCGAGTCCAGTGCAAAAGATGCCAAAGAATCGGACACGTAGCTGTAAATTGCAACA
TGGAATACAGATGTGTGAAGTGCAATGTCCCTCACAACCCAGGAGAATGCTCGCGCACCA
GCTCAGATACAGACAAGCCGTACTGCATCAATTGCAAAAGCTTCGGACATCCCGCCTCCT
ACAGAGGATGTCCTAAGCTTATGGAAATGAAGCAGAAAATACAGGCAAAAGTGCAACTCC
TCAAAGAGGAAGAAGAAAGGAAACGGCAACTAGTTAATAAAATAGTCAACCCAAACGTTT
CATACAGTTCCATGCTCTCCGGAAAACGCTCACAGTCACAAACAGAAAACGTTGCACCAA
GCAATACACATGTAACCAAACAGATCCAAAACCCTGCCAACAA
>LINE_comp656_g1_i1
GCTCGTCAGCCCACGCTGGACAAAACTCCAATGTGTGCTGCGTCGCGTCCTGGTCCCCAT
CATAGTGCCAGCATGGCGCATTACGCTCCCGCTTGATGCGACACAAGTACTCTCCAAAGC
AACCATATCCGGGCAGCACCTGTGTCACGCGGAAGATGAGAGGCACTACACACTGATTTG
TACCCGCATTCATTCCATCCTTCCACATCCACACTTTGGCTCGGTTATAGTACTGCATGT
CTCACGCGATCACTTCTATGAGGACTTACATAACCTCCGTCCAGATGGTTCTACGGTGTG
TTACTGACGTGAACTCAACAGGCCTGTGGCTCAAAAATGAAGAGAGGCAAGAGGATTCGG
CACGTTCCACCTCAACTCGCGGCTTGGCCAGTAACAAAGATGTGGCGAAACTAATTCCGC
CATTACTAT
>LINE_comp675_g1_i1
GTTTGCCAAGTGACTAAAAATGCTAAGGACTTTCCCTCAAAAATAGCGTCTTACATCGTG
CATACCGTAAAGGAACGTGAAGGCTACGTTGAAAGACTTACGTCCGGCTGATTGGGCCTA
ATCCTAACTCCTCGTCCATGATGGCCGTGTGGTGAAGCCCTCTGAATATATACTGCACGT
AAACCCGGGATCCCCTCTGTTGTGCAGTTCCACTGGACATTAAGTCATCTCCTAAACAGG
ATGGAAAGAAATTATTGTACTCTGTTGTCGTAGCGTAATTATATATCTTCGGTTTGATGG
TGATTGAGGTAAAGAAACTGACGCAAAATTCCCTTTGTCCTTGAATAAAAGAGTTAAAAT
TTGTTATTGTGCCATTATATTCCACTCATCACGGAAGCAAGTAGTTTCAAAGAAATCATG
GGTAACAAATGAATAGCTTTCCTGTAATTCGCGGTTGTATTTCGCGTGGAACAGTAAAGG
AATGCCATATCGGTTGTCATTGTTTATCGATCAGGCTGCCGCACAGTGCAGCTGTCTGTG
GGCAAGACCCCAAAATTCGACTACTCA
>LINE_comp785_g1_i1
TTTTTTTTTTTTCTTTTTTTTTTTCTTTTTCTTTTCTTTCTTTTCTTTTCTATTCTTTTC
TATTCTTTTTCTGTTCTTTTCTCCACTTTTTATTTCTTTTGCCTCCTTTTCTTCTCCTCT
CTCTCCCCTCCTCTTCATCCCTCCCCACTTACCAAAACCCTGACAGTCCATGCGGGCGGC
GCTTCGGCACCGTGACTGTAGGGTTCAACGGCGAAGGCAATAGCCGTAGCCAACCCGCTC
GGGATCAAGCGAAAGCTGGCGGCTCTACCTCCACGTGGTCCCCGCTGGACAGCGCTGGAC
GTTGCTTGCAGCGTCCAGGGCTGACGAAATGAGCCGCTTCCCCTCTTCAAGGGGTAGATC
CAACTTGTCCGATGACCTTCCCGAAAGGGGAAAGAGGGCAGGGTTGTTCCAAGCCATATC
CGTCCCAACATCTTCGGACTTCCCCTCGCAGCTGTTGAACTAGAAAGTAGGGCCGAATAA
CATCAGGCCGGCGTTACCGATATGAGGATAACCTCGAGGTGCGGTATGCTCTCCTGAGCA
ACGCCTAGACTACATGTCCCTATCTACTTTCTAGCGAAACCACTGCCAAGGGAACGGGCT
TGGAATAATTAGCGGGGAAAGAAGACCCTGTTGAGCTTGACTCTAGTCTGGCATTGTAAG
GAGACATGAGAGGTGTAGCATAAGTGGGAGATGGTAACATCGCCGGTGAAATACCACTAC
TTTCATCGTTTCTTTACTTACTCGGTTGGGCGGAGCGCGTGCACCGAGGTCTTATGACCC
GGTTGTCACGGTGTTCTAGAGCCAAGCGTGTAAGAGTGGTGTGAGGCCAGGCGGCTGATC
GCCGACAATACTCCCGCGTGATCCGATTCGAGGACACTGCCAGGCGGGGAGTTTGACTGG
GGCGGTACATCTGTCAAAGAATAACGCAGGTGTCCTAAGGCCAGCTCAGCGAGGACAGAA
ACCTCGCGTAGAGCAAAAGGGCAAAAGCTGGCTTGATCTCGATGTTCAGTACGCATAGAG
ACTGCGAAAGCACGGCCTATCGATCCTTTTGGCTTGAAGAGTTTTCAGCAAGAGGTGTCA
GAAAAGTTACCACAGGGATAACTGGCTTGTGGCGGCCAAGCGTTCATAGCGACGTCGCTT
TTTGATCCTTCGATGTCGGCTCTTCCTATCATTGCGAAGCAGAATTCGCCAAGCGTCGGA
TTGTTCACCCGCCAACAGGGAACGTGAGCTGGGTTTAGACCGTCGTGAGACAGGTTAGTT
TTACCCTACTGATGACTAGTCGTTGCGATAGTAATCCTGCTCAGTACGAGAGGAACCGCA
GGTTCGGACATTTGGTTCACGCACTCGGTCGAGCGGCCGGTGGTGCGAAGCTACCATCCG
TGGGATTATGCCTGAACGCCTCTAAGGCCGTATCCTTTCTAGTCAAAGGAGGCAACGATA
TTTCCTAAGGAGTTTCGTGTGGGTCGAAAGGCTCAAAACAATGTGACACTACTAGGTGGC
CGGTCCACGTGGCCGGCCATCGCACGGGCCCCATTTTGCCGTACGGGCGTCTTTGTACCC
GTCGTCGGGATCTCTCCGAACGACGGACACGGCGCTCTAACGGTCGATCATGGGTACTCC
AAGTTCGACGTCGAGACTCGGAATCGTCTGTAGACGACTTAGGTACCGGGCGGGGTGTTG
TACTCGGTAGAGCAGTTACCACGCTGCGATCTGTTGAGACTCAGCCCTATGCTTGGGGAT
TCGTCTTGTCGGTTAGACGAGGCCCCACAGACAGACAGACAGACAGAGAGAGAAAGGAAA
GCACACGAGTTCACAAAGACTCTCTCTTCTCTTGCTCCTCTTATGCGTTGCGTATGCACG
CCGCTGCTGCTGCTGCTGCTGCTGGCTGCTCCTCTTCCTCTCTTTCGGAGGCTGCTACCT
TGTTATACTAGTTTAGGTAGCGGTGTCTTCGGAGGAAGGAAACATAGAGGAGTTTGTTAG
CGGTAGCGGTGGTTAGCAGCGGCGTGTTATACGCGCGCATAAAATATAGAGGAGTATTAT
AGAGAAGAGAGAAGAACTCGTGTGTTGTTGGAAATAGAAGAAAAAAGAAAAAAAAATTTT
TTTTCTTTTTTTCTTCTATTTCCAATTTTTTTTTCGCGCCGCGCGAAAGCAACACGCCGC
TGGCACTTAGAAAAAAAAAAAAAAAAGAACGCGCGCGCGCGCGTGGACGGATTTGGAGTT
GGAACTTGGCGCGAAAATGCGAAAAGT
>LINE_comp802_g1_i1
TGCCGGTTTCTTTCCGTCCGCCATTGTTCTTGCAAACTATGCGTTTTATTGTGGTATGAG
ATTTTTTGCTGTAGGCTGTATTTTTGTACATTAGATCTTCCACGTCGATTACAATTATCC
CGGTTGCAATACTCGAATGATATTGGTGCTCTAACATAGAAGTAATGTTGATAAGCGAGC
TATTTTACGAGATATCTTGCAATTCTCCTACAGTGTTTACAATACGCTTCATGTCAATAG
TAAAGATACACCAGATATCTCGTCCATAGCATCGTTTCTTCGACATCGTGGAAGTGAGAT
ATCTCGTTCATTTTAGCGAAAGAGCTAACCTAGTGCCATAGAATTATCTTCATTATTACA
CTCGTTAGCTCATTAGCATATTACTGTCCACTAGTTGTTTGAGAGGAAACAAAAGAAGTT
TCTGTTTTGTTGCATGTGTAAATTTACTTCGAAGATAGCAGCATTGAGAATAGTGAAATA
GTCTTATTTTTTTTTCTTTGTAACAG
>LINE_comp945_g1_i1
AAACGTTGGTGCAAGTGTTTGTTTAGAGAGAGTATTCGTATACTTAAAGGTGTGAGTGAA
ACTGTGTTGAATTGCGTGAGTGAATATGAGCAGATACTTGTACGCCTGATGTGTGAGAAT
GATCGACTGAAAGGAAGATTGGATGAGTGCAAGATGAGAGAATCTGTGCCCGTCCAGAAT
GTATGTGCGGGTGGAAGGAGCTTTGCGAGTGTGGCGAGTGTGAATGCGAAAGGTAGTGCA
AGTGTGAAACCCGGTGTGAGTGTGCCGGTGATGAGTATGAATGCCAAAAAGTTCGCGGTC
GTTATTAAGCCGAAGGATGAAAGCCTGAAGCTTACTAGCGACCAGGTGAAAGAAAGAGTG
ATGAATTAGGTAAGTAAGAAGCTGAATGTGAGAGTGAAAGCGGTTCGTAAGACACGAAGT
GGAGGAATAGCCGTCGAGACGGGTAGTGAGAAAGAGATGAAGATAATGCGTGAATGTAAA
CAGTTTGAGAGTATCGGTATGAAAGTTGAAGAACCCAGAAAAATAGGAGCGAAAGTTATT
GTGTATGATGTGCCGTGTGAGATACCGAGTGAAGAGCTATTAAAAGAGTTGTATGAAAAG
AATCTGAGTGAGTGTGTGAATGAAAAAGAGTTTGCTGAGCGTGTGCGTGTGGTAAACAGA
ACGAATAAGAAGGATGCGAATGTAGGAAATGTAGTGTTTGAGATGAGTGTACGAATGTTT
AACAAGATGATGCATGAGGGAAGAATGTATGTGAGATGGCGTGCTTGTAAACTGCGTGAG
TTTGTGAGTGTGTTTAGGTGTCATAAGTGTGGTGCATTCGGG
>LINE_comp1249_g1_i1
ATTTGGGTGTATTGATGAGTGAGAAATGCGTGAATGTGGCCATACTGCAAGAGCCATATG
TGGCCGTGGATGGATGCGTAAAGGGCTTGCCCTATAGTATGAATGTGTATGTGTCTGAGG
TGGGCCAGAAGAAGGCCGCCGTGGTTGTAAGTGAGCGAATGGAGTCCATGTGCGTTAGCG
AGCTAACGAACGAGCATGGGGTATGTGTGTGGGTCAAAGGGGACTTCGGGGAACTGTATG
TTGTGTCGGTATACTGCAGGTACGGCCATGACCTTGGGCCGTACCTGGCTTACCTAGAAT
GCGTGCGTGAGAAAATGAGGGGAAAGAGGTTGTTGATTGGTATGGATGCGAATG
>LINE_comp1296_g1_i1
GTCCAACACTAAATGTATCACGTTCATCAAACAACCAGCTTTAGAATTTCATTAAAAAGT
CAGCATTCTCACACGAATACATGATAAAAGCGCACATAGTAAAAAACGCACAATGTAAAA
TACACACAATCCATAACCCGTACAAATAGGTATTGTGCAATTATAAAGTAAAAGCGTGGA
AGAAGAACGAATAGAAGAGTGAAAAAATTAGCCCCATTGTTACACTCGAGGTGTATTCAT
AAATAAACAGGCGGCGAAGATGCGTCCCAAAATATAATTCATAACCACGCAGCTAGCGCG
GAGAGAGTAAGGACGTTTCCTGAAATCCCCTTAATTTTTACGGCCTCCATACCTGGGTCA
TAAAACACCCGGTGACCGCATGCGACGCAACAGCTACTTGCGACTTACCATCATAAATCA
CTACAACGACGAGACAAGACGAAACTAGACTTCGACAATTTCCCACCTCAAGAAGTAAAA
TAAACACACCCATGACCAATAACAAAATACAGCTTTTCTCCACGTAAAACTGCAACTGAC
TAATACGAAAAAACCCGAGGTTACATAAACTGAAACGCGACGAGAACCATACAGAACGGT
ACGAGACGACTAAACGTTAAAGATCCAGTCATTCCATCAGTATTTGTACCATCAAAGTTC
ATCTTGTATAAAATAAAGTGATAGTTATTATCTCTCGCCTTGTCTTCTTCCTTCGATCGG
GACAAGAACCTTTCCGTAAGTTGTGGCAATGTAACATGCAGTATTTCTGACTGTCAAGAG
CAGACATAATTTTATTAATTAGCCTGTATACCTGCTCTGTTGCGGCGTGCTTTTCTCTGA
ACTCAAAGTAGTGGTCTGGTATTAGTTATTTACTGTTGATTATTTCCATAATTCTGATTT
AAGTAATGTAAATATTTTTTCAAACATATTAAATAATATTAGCAGAAGAGAGATGGGTCT
GCACGAGGAAGACTCGTTGGGAAGCACTGCACTCTGAGTATGGTGTTGTAAATTATTGTT
ATTATTCTAATGTTCTAAGTTCTTTAA
>LINE_comp1317_g1_i1
TGGGCGGCATTGTTAAACAATAGTTTTTTCACACGATTCGTACAGGAACGAAAACGTTGC
GTCGAGTGATGTGACATCGTTTTGATACACCTCTTTATGTAGAGATGGAGCAGCTAGCAC
GGACCAATCGCAGCGCGCAGCAACCCCTCTCCAGACCGCGAATGCTCCCATTGGTTGGCC
AGTTCTTACCGGCCGGCAGTATATAAGGCTCTACAAGCGGACCACATTTAAAATTTCGAG
AGGCTCTTCGTCGTTAACTCTTCTCGTATATCAAGTAAACACAATCAACATGTCTGGACG
CGGAAAAGGCGGCAAAGTTAAGGGAAAGGCGAAGTCCCGTTCGAACAGAGCTGGACTTCA
ATTTCCGGTTGGTCGTATCCATCGACTTTTGAGGAAAGGGAATTATGCCGAACGCGTCGG
CGCTGGTGCTCCAGTTTATTTGGCTGCAGTTATGGAGTATCTGGCTGCTGAAGTTTTAGA
GTTGGCCGGTAACGCGGCTCGTGACAACAAGAAGACGAGAATTATTCCCCGTCATTTACA
ACTGGCAATCCGTAATGACGAAGAATTGAATAAGTTACTTTCCGGAGTAACGATTGCTCA
AGGTGGCGTTTTGCCGAACATTCAGGCAGTTCTTTTGCCGAAAAAGACAGAAAAGAAAGC
TTAATCGCAATTTGAAGA
>LINE_comp1328_g1_i1
ATAAATAAATAAATAAGTAAATAGCCATATAAATAAATAAATAAATGTATAAATAGATGA
ATTAATAAGTATATGTTTGAATGCGTGGTTAATTTATAGATTTGTGTTGTTAATTGTTGA
CATAGCCGACACCAGGGTTATACGTTCCCCAGTCCTCCGCCATTAACAGATAAATTAATA
ATATAAATAACTTAACGGATAAATAATAACATTAAATAAAATAATAAAAGTAAATAAATA
AATCGGAAGATAAACGGTGACAGTAAGATAATAGATAAATAATAAGATAGAAAGTGAGTC
GGTGTACAATTAGCATGTTTGCTCAAATGTATAAAGTTAAAAGGGCGTGAGCGCGGGTAT
AAGGTCTGTAAGGCAGGGCATGCAGGCATTGAGGGGCAGTCAGGTATGGCGGAGAGAGAA
GTAAGATAAAAATAAAAATAAAATGTAGATAGTATCAGAAATAAAATTGTTGTTAGTCAG
TTGGTAAAATAGTAGTAAAGATTAAAATATAGATATCAATAGTTATATAGTCCATAGGTA
TAAGAAGCGGATAGCTTAGTATTTAGCACCATTGTAACCAAAGTATAGAAATTATAAGCA
GATAGAGCAGTAGAAAAATAGATGGAGTAAATAATTATAGATAAAATGATAAATAAATAA
ATAAAATAAATAAATAGACTTAATTTAACTCTGTGAACGGATACTCTGCCACAGGCAGTA
AACCGGAGAAGCGCAATCTGAACGTCTGGCACACAAATGGTTATGTCATTAATAATGACC
TTTATTAAATCAGTTATTAAGGAAATCAGCTTTGCACAGAACCTTTACATTCCATACGGA
CCTTTTAATGGATTAAAAATGAACGATTACTTCCAAGATATTATTA
>LINE_comp1388_g1_i2
GAATAGATAGGATAGTAAATAAATAAATGGTAAGGAAAAAGGATATTGAATGCCACTGTT
CCTTACTTTTCCTTTCGAACTTCTACAACAATTTGCAAGTAAACGATTCGACTCGTGATT
CCTTTTAAACTACGCCTGACCCTGATTTATGCGAAAATCCGTTCTACGTGAATTCGTTTT
ACGCGAATGAAAAAATAAACAAAGTCTGTCGGTACAAGAAGAAACAAAATATTGGAAAGA
GAAGTTGGTATAAGTTTTAGAAACATATATTTGTTTTACATAGTCAAATAAAATCAATAA
CAACAATGACATTTCAGAAAACAAA
>LINE_comp1629_g1_i2
TACGTGTCAAATGTGGAATAGAGAAATTCTAAACGCTAAAACTACCTGGCAGGTCGATAT
CACACATTTCAAGTTTCTAAGTTTTTAAGTTTCTATGCTTCTAAGCTCCCGAGTGTCAAG
TTTCCAAGCTCCTGAGTCCCTAGATATCTAAATTTCTAATTTTTAAGCTTCTAAGCTTCT
AAGCTTCTAAGTTTCAAGTTTCAAGTTTCCAAGTTTTCAAGTTTTCAAGTCCCTAAGTCT
CAAAGATTCTAACTGTTTAAGCTTCTAAGCTTTCAAGCTCCCAAATGTCAAGTTTCCAAG
TTTCCAAGT
>LINE_comp1669_g1_i1
AAGAGTGGACCTCGTGAATGAAAGGGTGTATGCGCGATGGCAGGCCAGGTGGAATGAATG
CGTGAGTGGAAGGGTTTTGTATGAGTATGTGAGGAATGTTAGGTTTGCTGAGTGTGCCTG
GTTCGATCCGAGTGTGTATGCTTGTTTTTTGCTGACTGGTCATGGTAGTATGAATGGGTT
TTTGTATAAGCGTGGTTTGAGTGAAACTGAAAGGTGTATGTGTGGGGCTGACTGCGAGGA
TTGGAAGCATGTGCTGGTTGAATGTAGTATGTATGATGATTTTAGAAACCTGAGTGAATG
TGGAGTG
>LINE_comp1794_g1_i1
AGATCGGAAGAGCGGACCAGTTGACGGCCGCTTCCGAGAGGGCCCTCACTCGATCCACCG
CTTCGATGGTGGATCGGCCCTCCCGGAAACCATACTGGCAGTCCGCCAGATCGGGACCGT
CGCGGGACAGGTACCGCACGACGCGAACGTGGATGACCTTTTCGAATATCTTGCCCGCCT
CGTCCACCAGACATGACCGATGCGCGGGAGGAAAATCCGCGGGCCTTCCCTCTTTCCAAA
GGTCGGGGAACACCCCCGGCCGAACGCACTCCGACAGCAAATCACGGAATCTTTCTCCCA
GGACGCCCAGAGCCATTGCCCAGGCTTTTCCGGGGATCCCATCCTGCCGCGGTGCTTTGT
TTTTGCCCCGGAGCCAACAGATTGCCCCGGCGATCTCCCCTTCCGTGACCCCCATATCGG
AGGACCAGGTTATTTTCTGGTCCTCCGTTTCCGCGTCAGGTCG
>LINE_comp1794_g1_i2
GACGCTCTTCCGATCTCTCGATGCAGGCTCCACCTCGCCGGATCGACGACCTTGGGAGAG
CTCTCGACCGAGGCCGTCTGATTCAACGGGCGGCCTCGGTCTTGCCCGGATCTGTCCTCT
GATCCAGGTCGTGGATCCGCGCGATGACGGCTGCCACCGCGACCTCCGCTCGGCGGACGG
TCCTCCCGAACCACTTGCGGACGGTCACCACCAAGGTGTCATCTGCGTAACACACCAAGG
TGGAGCCGTGGGGAAACAAGGCCCGAAGGACCGTGTTATAACCAAGGTTCCACAGGAGCG
GTCCTAGGACCGACCCCACGGTCCACCTCCCTCCGCATCAACCTGTACCGGTCTCGATAC
ACAATCCCCCTGTCCCGCAGGTAGGACCTGATCACTGCCTTCAGGTAGTTGTGCATAACA
AGTGCCTCCCTAATCGCGGTCCAGGGCAGGGTGTTGAAAGCATTGACTATATTCAAAGAT
ATAGCTAAGCACATCTCGCCCCAGTTGACGGCCGCTTCCGAGAGGGCCCTCACTCGATCC
ACCGCTTCGATGGTGGATCGGCCCTCCCGGAAACCATACTGGCAGTCCGCCAGATCGGGA
CCGTCGCGGGACAGGTACCGCACGACGCGAACGTGGATGACCTTTTCGAATATCTTGCCC
GCCTCGTCCACCAGACATGACCGATGCGCGGGAGGAAAATCCGCGGGCCTTCCCTCTTTC
CAAAGGTCGGGGAACACCCCCGGCCGAACGCACTCCGACAGCAAATCACGGAATCTTTCT
CCCAGGACGCCCAGAGCCATTGCCCAGGCTTTTCCGGGGATCCCATCCTGCCGCGGTGCT
TTGTTTTTGCCCCGGAGCCAACAGATTGCCCCGGCGATCTCCCCTTCCGTGACCCCCATA
TCGGAGGACCAGGTTATTTTCTGGTCCTCCGTTTCCGCGTCAGGTCG
>LINE_comp1895_g2_i1
ATTAATGCATGACTTCAAATAAATTTTTTGGAAGTTAATCTACTAAAAATGCGACTTACA
TAATGATTGCTATTCACTTCCAAGTCTAACCTCTGTAAAACTTTTTACAGTTGTTGGGAA
TAATATTTGGAGTCTTGAAATACTTTGGATATACATGCAAGCTTTTTTAAAAAGTGATGT
AATCTTCGTTATAAAAATTTAAATAATTGAAAATGTGTCTTAATTAAAATTCGATTTATT
GGGTCATTCCATAAATAACGCGGTTTTTCGTATTTCTTTTATTTTTAAAAACAAAGATAA
ATAAAACTGCTTTCAATCTGAAACATTATAACCACTTTCAAGTGTCGTGCATCTTTATTT
TTGAAAATAAAAGGAACATACAAAACCGTATTATTTATGAGGTAACTCAATAGATCTCAA
TTCTTAGAAAATTAACTTGTTCCCGAAAGTAGTACAGTAACTTCGCGTAAGTAATTATAT
CTCGAAAACAGAAAACGTTTCGCTCATGTACGGGGTGTTGATAAACATTCCGATTCAACT
TCAGCAGCATGCAGTAATCGTCAAAGGATACAAGACAGTCTTAATAAACTTGGATTCAAG
ATCCATTAATATCACAGTTACAAGATATGTTTGTTAATGAGACATTAGCTCCACGCTATA
CTTTTAATGTGTCCCCCGTTTATTTCAACACACACCTCGACGCGCTTCCTCGGAAAAGCT
CGTACATGTTGAAAGGTTCCCGACATTCCGCTTATCTTCTG
>LINE_comp1902_g1_i1
CGCGTCATTTCTACTATGGGTTGGCAGCCACTCCAGGAGTATTTACAATGGCGCGCGATC
GTGTTTTATCAGTAAAAAAAAACGCGTATATGTTTTAATGTCATGTTTTATTAATATAAT
TACAATATAACAAATGTAACGATACGACAAACCATTTATAGAAAACAAAATTGTTCGTAA
ATGCCGCCGTACTGCAAAGGCTTAAGTAAAATAATTTTCTTATTTCCATAAATAAATTTA
ATTGAAGTTATAATAATTCCATTTTATTTAAAGTAGCGTCTATAAGATTGTGGCAAAATT
AAACACCGTAAACATTGAACTTTTGATTCAAAATAAATCGTCAGGGAAGGGGTTAATATT
TTCTTATTACTATTATCATCGTAATTATTATTAGTATTATTATTTCATTTTTTAACAACA
AAGGTAGCCCATATAATATATAAGCAC
>LINE_comp1920_g1_i1
CTGAGGAAGGAAGGCAGGCCTGCAGATTCTCCCTCCGCGTACCGGTCGATATGTTTGTTG
GACGAGGTGGGCAAGATGTTCGAGAAGATCATCCACACTTGCCTCTTCCAGCACCTGTTC
CGCGACGGACTCAACCTGGCGGAATGCCAGTATGGTTTTCGAGAGGGCCGATACACCATC
GAAGCGGTGGATCGGGTGAGGCCCCTCTCGGCGGCGGCCATCAGCCGTGGCGGAGTGTGC
TTGACTACATCCCTCGATGTAGTCAATGCGTTCAACACCCTGCCCTGGACCGCCATTAGG
GAGGCGCTTGTATTACACAACGTGCCTCCCTATCTTAGGGCGGTGATCG
>LINE_comp1920_g2_i1
TAAATACAATAAATAAATAAATAGATAAATAGATAAGCAGATAGACAGACAAGCAGTTAA
AAAAAGCAGAAACGGTAGCAACAAGTAGCAGCTTGCGGAGACGAAGGCCGAAATGGGGGG
AGCACGAGTTTGGACCTGGCTTTCTCGATGCCGTGGCAGTTCATTCAGGTCCCCACGCCT
CTCTGACAAACCCACGGGTCGAGTCACAACCCACGATGGAGCTGATATTCGCTTATACCA
ACAAATGCCTCGCGTTAAACTGGGTGGGGAATTTCGGCGAAGTCGGTGGGTTGCGTCTGG
TCAAGACCACTCGCCTCACCGTGACTCCGTGACGGACCCGCCCTGGCGAACTGCCAGTAT
GGTTTCCGAGAGTGCCGATTCACCATTGAAGCGGTGGATCGGGTGAGGGCCCCCTCGCAT
GCGGCCGTCAGCCAGGGTGGGGTTTGCTTGGCTGTATCCTTGGATATAGTCAATGCATTC
AACACCCTGCCCTGGACCGCCATTAGGGAGGCGCTTGTATTACACAACGTGCCTCCCTAT
CTTAGGGCGGTGATCG
>LINE_comp1963_g1_i1
AAAGATATCGTGTCTCAAAACGCGGAAAAACCCCTCGCGGATCACGGGGCGCAGCCACGA
ACAACAACGCCTGTGCCCTTCCCACCCCGGGGCCGGTATACGAGCCGCCTCCAGTCCCAA
TTGGAGACGCCTCAGGCCCATGGCGGGGATCCCCATTTAAGGGGGGCCCAGCCACGACGA
CCGAACATTTTTACGTCGGAGGAGCCGCCGGCGGGCCCGGGCTTCACGCCCTGCGACGAC
GTCGACCCCTCCGCCCTCCCACACGAGAAGGATAGGAGTCGCGCTCCCTCTTCCTCTCCG
CCGCCACCTTCCGGCGTCTCGCGTGCTCGCAGAAGGAGGCGAGGGCCTTCCATTTCTGAC
CCCCCACCAATTGTGCCCTGATGAGCCCGCACGGAGAAAGATCCCCCCTATAATATGGAC
CAGGACCCGACGTTCCACAGCCCACGCCGGACAAAACTCCAACGTGTGCTGCGCCGTGTC
CCGGTCTGCGACGCAGTGGTGACACCGCGCATCGGCGGCCGCTTTTTACGCCGCCGTAGT
GCGGATCGGGACTTCCCGGTGCCGTGGGCAGCCGTGCATGAGGGGCAACCCATTCGGGGA
CCGGCCTCCGCGCCCCTCTCTTTGCAGAGGACACACACGGGTGTGTCCCTGCAGGATGTC
GCGTGATGATCCGCGGCGCTGCACCTGAAGCACAGGTTTCTCCGTTCGACCGTGGCAGTG
CACCGCAGCCTCACGTGTCCAAACGCAAGGCAGCGGTAACACTGCAACGGCCGAGTCTCC
AGCGGCCTTACGGAGGCCGCGGACCACCCCACCTGG
>LINE_comp2035_g1_i1
AAAATAACTCATCCATAACCCAATCTCTTTATGTCTAATCACATTCAATCTCTCAAACAC
TCTCATCTACTCCAAATTATCAAACGCACATTGAAAGTCAACAACCACTCCTAACACATA
TTTACACGCATCCCCTGGGGGGGACCGGGAACAGTGTCGGATTTCTACCGACTAAACCCC
CACGATCTTCCTTCCGCGGACCGAAATAGGGGAGGCCGGCGCCCAAACATACGCTCCTCA
ATTTCCACCAACACAATGTTAGATCTGGCCTCCTTGATCGTGTCGGTCGTCGTGGTGCTT
GACCCAGGCACCAGGGTGACCGACACCGCCGCCGTTTTTGGGACCCGCCCAACCTTGGGT
TTCCCCTTCTTAGTGGCCTTCTTCTTAGTTTGCCGCTTAGGGCCCTCTACACCGGAGGTG
GTGGTATCCGCATCCGAGGACACGGGTCTTGTCGGACGGGAACGTCTGGAGACCTTCCTC
CACTCTCCATCCTCCTCAGTGTCCGTCCCGTATGGCGTTGAGGTCGCCATTCCCTTCTTG
GGCCTTGTGTCAAGCCCTCGCCTGACACATTCCGCGAAGGTCAGGGACTTTGGCGGTGGC
CCCTTCCCGCTGGCGGTCAGAGCACTCCCTCCTGACCGGGTACTTCGGATGGGGATAGTC
CGTACCGAGGTCGT
>LINE_comp2035_g1_i2
ATCCTCCACATTACACTCGCCCTTGTCTGCGATTGCCAATGCAATTTCCTGCGGGGTCAC
AGAATCATCTATTCTGGTGACCCGCACCTCCGACATCTTTTGCGGCACCGCAATTTTGAT
GTCCGCCCTGCCCTCAAACAGTGTCCGCATCGACGTAGCCAGAGCGGTAGCCTTCCTGGC
GTTTTTTTCCCCCACGACTTCCAGGATCATAGCCCCGGTAATAGCCCTTTTGGGCCTGAG
CTCCCCAGGACCGATGCCAATCTCCTCTAACACAATGTTAGCTCTGGCTTCCTTGATCGT
GTCGGTCATCGTGGCGCTGGACCCAGGCACCAGGCTGACCGACACCGCCGCCGTTTTTGG
GACCCGCCCAACCTTGGGTTTCCCCTTCTTAGTGGCCTTCTTCTTAGTTTGCCGCTTAGG
GCCCTCTACACCGGAGGTGGTGGTATCCGCATCCGAGGACACGGGTCTTGTCGGACGGGA
ACGTCTGGAGACCTTCCTCCACTCTCCATCCTCCTCAGTGTCCGTCCCGTATGGCGTTGA
GGTCGCCATTCCCTTCTTGGGCCTTGTGTCAAGCCCTCGCCTGACACATTCCGCGAAGGT
CAGGGACTTTGGCGGTGGCCCCTTCCCGCTGGCGGTCAGAGCACTCCCTCCTGACCGGGT
ACTTCGGATGGGGATAGTCCGTACCGAGGTCGT
>LINE_comp2046_g1_i1
GTCCGCCTCCTCTTCGGGAGGGAATCGGGGTGACACCCGCAGCCAGAGCTCGGCCAAAAC
CGGCAGCCCGGCTAGCGAGGCCCCCCCGCACGGCAGCAATCACTATCACGATCGCGCCGG
GGGCGGAGATGACATACGAGAAGGTCATCAGCAATGCTCGCAAGGAGATTAACCTCGGGG
AGCTCGGGATAGAAGATGGTAGGCTCCGCCCAAAGCGCGCTGCAACGGGGGGCCTCATTT
TTGAGGTCTCTGGGAAAGACGGCCGCGAGAGGGCCAAAGCCCTGGCGGGAAAGCTCTCCG
GATATCGTGGCGGCCGTATCGCGCATCGGAGGATGCCGTGCGGACGAGGTTCGCGTGGGG
GAGATCCGCTCCTCCCCGCGTGGCCTCGGCTCCGCCTGGGTCAGGTGCCCCCTCCCGTCG
GCCCGCAAGGTCGTTGAGGGGGTCGCCTCCAGGTGGGGTGGTCGGCGGCTACGGTTAAGC
CGTTAGAAACCCGGCCGCTGCAGTGCTATCGCTGCCTTGCGTTTGGTCACGTG
>LINE_comp2073_g2_i1
ACACATTTTTTGTTAAACATGTCATTTCATAAATATCTTCAAACAAACATACTTGACAGA
TGAAAGTATTAACAGAAAGGACTGATATTTAATCCTTTCGTCTCTGAATATGTAGTTTCT
CCTCTAAATCGAAGCGAGGGCCAAGAATAGTTACTTTCAAGCGAAGTTGAAGCTTTTCAA
TGAAAGAAATAAAATAAGCAGTCATAGTAATAATAACAATATTAATAATAATAATAATGA
TAATAATAATAATAATAATAATCGTGATGGAATAATAAAAATATAAATAATATAATAATA
ATAATGTTGAAATAATGAAAATAAAAACAATATAATAATAATAATGAAATAATACAGATA
TAAATAATAATAAAATAATAATAAA
>LINE_comp2195_g1_i1
ATCAGCGACAGATCATTTCAGACCAGCTTAGGGAAAGAAATTTCACAAATTAACTTCCAA
ATCAATAACGGATTACAGCAAGGAACAATAAACTCCCCAATCCTATTTAATATTTACACA
AGCGACATACTAAAACTTTTCGGTCCCGATAACACATCCTGCTCATTGCTAGCATACGCT
GACGACCTTATTATTTATAGAGCAGATAATTCCCCCAAAGAAGTCCAAGCTACTCTTCAG
ATTGCAATCA
>LINE_comp2195_g1_i2
TCGCAGTATTCGTAGAACGATGGCAGCCGGCCCCAATATTAGACATTCAATACATATTAT
AAACAGCAGGATCAAAGCATTAAGGAGAAAAATAAAAACGGAGATCGACAAAGAGGTCAA
TAATTACTGGTTCAATAGAATCAACAAAATAAATCCCAAACAATCCCATAAAATGTTCCC
CGACATCAACTCAATTTTTAGGAAAAAAGAACCATTAACTATCCCGGCACTTAAAATAAG
CGCAGAGGATACAGATCTACTATACAGGGCCAACATAGATCCAAAAACCCTACACATAGA
CGGAAACAATAATTTTTGGGTAAAAAACAATATCGAAAAATTAAACTTACTAGGAGCCTA
CTATTCCAAAGTCAACGATCAAAACACGGAAATTAATAACCCCAAATTTAGAAATATAAT
CGAAAGAGAATACTGTAAAATTAACACTGAACTAGTGTCAAAATCACCAGCAACATTATG
CACATTTAATCATAATAATTCAGCAGTTATCCCGCTACCAACCGACGAAGCCTCAATGCA
CCTCACAAACCTCTACAAAGTCGAAAAGAAATTCAAATGCTTAAATAGTAAAAAATCGGC
TGGAAACGACAACATTCCTAATATTGCCTTGAAAAACCTACCGAGAAACACAATTCTCCT
GTATACAATATTATTTAATAACATGTTAAACCACTCATATTTTCCGGTAGAGTGGAAAAA
CGCAAAAACCATAGCTATCCTGAAAAAAGGAAAAGATAAATCTAATCCTTCTAGTTATAG
ACCTATCAGCTTATTATCAAACATCGGTAAGGTATATGAAAGAATAATAAACGACGCTAT
AATAGAAGAATGCCATAAAAAAGAAATAATTCCGGAGAATCAATATGGTTTTCGTAGACA
CCACTCCACAATACATGCAATTAACAAACTCGCATCAGATGTCTGCTGGGCACTGAATGG
CCACAAATGCGTTGGTGCTTGCCTGGTAGATTTGGAAAAAGCGTTTGACACCGTGTGGCT
ACACGGCCTCATTTATAAACTAAAAAAAAAAGGGTTCTCATTAATGCTAATTAAAATAAT
AAAGAACATGATTAGCGACGATTGATTCGGCCAAAATTGATTGATCGATGATTCAGACCA
GCTTAGGGAAAGAAATTTCACAAATTAACTTCCAAATCAATAACGGATTACAGCAAGGAA
CAATAAACTCCCCAATCCTATTTAATATTTACACAAGCGACATACTAAAACTTTTCGGTC
CCGATAACACATCCTGCTCATTGCTAGCATACGCTGACGACCTTATTATTTATAGAGCAG
ATAATTCCCCCAAAGAAGTCCAAGCTACTCTTCAGATTGCAATCA
>LINE_comp2278_g1_i1
GATATTGTTTATCGTAGCGAAGTCTGATAGGTAAAGAGTGTATAGAAGTGGTCCTAGAAC
GCTCCTTGTCGGACTCCTGATAATATCGGATTAAGGGCAGATAAGGCTTGTGTTTTGACT
TGGAATAATCTATCTGTGAGGTAGGATTTTAATATGGAGTACAACGTCGATGGTAGTAGT
TCTTTGATCTTGATTAGTAGTCCGGTATAACAGACTTTGTCAAATTCCTACGATCCGTCC
AGAAGTGCAGCGGAGCAGTATTTCCTGTCATTTAGATCTCCCCTGATTTTATTAACCGGT
CTATGTACTTGCTGTATGGTGGTGTATTGTTGTTAAAATCCAAATTGATGTTGTGGAATT
AGTTCGTTTATTGCAGGTTTTAGTCTACGAATTAACAGTTTCTCAAATAGTTTGGAAGCA
ATTGGTAGTAAACTTATAGATCTATAAAAAGTAACTTCATCTGGAGGTTTTCAAGGCTTG
TGGATTAGTTTCATTTGTGCT
>LINE_comp2278_g1_i2
GATATTGTTTATCGTAGCGAAGTCTGATAGGTAAAGAGTGTATAGAAGTGGTCCTAGAAC
GCTCCTTGTCGGACTCCTGATAATATCGGATTAAGGGCAGATAAGGCTTGTGTTTTGACT
TGGAATAATCTATCTGTGAGGTAGGATTTTAATATGGGTTAAAACGCCGATGGTAGTAGT
TCCTTGATCTTGATTATTAGTCCAGTATGCCAGACTTTGTCAAATGCCTGCGATACGTCC
AGACATTTATTATATTTCTGCTAATCTTATTAGCCAGTCTATGTACTTGCTCTATGGTGG
GCTGTTGTGGAATTAGTTCGTTTATTGCAGGTTTTAGTCTACGAATTAACAGTTTCTCAA
ATAGTTTGGAAGCAATTGGTAGTAAACTTATAGATCTATAAAAAGTAACTTCATCTGGAG
GTTTTCAAGGCTTGTGGATTAGTTTCATTTGTGCT
>LINE_comp2416_g1_i1
TCTGAAATTTCTTTCTTACTTTTCTTACACGCTTCTTCATTCGCTCAAGTCCACTCGTCC
ACCATACAGACTTCCTCACATTAACACTCTTAATCTCTTTCAACCTCCTTTCATTCGCAA
CTTGAACCCATGACATGACACACTCGACCAATTCATCAGCATTCGCATCTTCCTTCACAT
TCACACCATTCACACTTGCATACTCTTTCAATTCGCTCACATAACCATCCCAGTCGACTC
CTTTGCTGGACCACCTACGCCCGGCCACTGAAACATTTTCACATTCACTCACATAACTCA
CTCTTACATTTATGACATTGTGGTCACTCACACCCCATTCGCTCTTTACTTCCCATTCAA
ACTCGCACCTGGCCCACGCATCATTCACCAGAGTGACATCGA
>LINE_comp2451_g1_i1
GAGCAGGCTTGAGGCGAATCGGATCAGATTTAAAAAAACTAGAAGTTATAACTGAGAATG
AATATTTTTGCATAAATTCGTTATTAATATACGTTCCATTTCAATATCGGTAGAAACAAT
GTTTAATTATGACTTCTGAATATGACATCTATTATACAATGGAACATTAATGGCTTTTAC
ACCCACTACGAAGAGCTCCTAATTATATTAATGACTGAAACAAGGAAAACATTTAACATA
GGAACATCACTGGAAGAAACTATTGGGAACCGAGAGAAGATAGAACAAAGTCTAAGATTT
TTGAAAGTGATCGGAATATACAATGATATAATATAAGTAAATAGGAACCTAGGATTACGT
TAAACTGTTGGGATAGCATTTAACCAGTTAACTGTAG
>LINE_comp2484_g1_i1
ACACGACGCTCTTCCGATCTTTAACATTTTATCTACCGCAAGCCTATTAAGCAGTTAGCT
GCGTTCAACGAGTATATGCATCACCTTCAAATCAAAATGATACTAATTCTTTTAACGACG
AATTCTGTATTTTTTGAGATAAACATGTGATTTTTCTTCTTCATTTTGCTTTGATTTTTT
ATTAAAATATATCTTAGGTGTATTCGTCCTGCGTTTGGCTAGTGCATGC
>LINE_comp2576_g1_i1
AAACACTTTTCTAGGTTCCACAACTAGAAAAAAAATTGAAGAATGTGAATGAGTAAACTT
CGTAGCAAATGTTAGGTTCAAGTTTTCAGCATTTTCATATTAGATTCCCAAAATTTATCA
AATCATAAGGCATAGCATATAAAGGAAAAATAGTAATTGATTAACCCTTTGTACTCGGGA
GGTGACTCTCGGTCACCACTTGGTTTGACACAGTGAAACTATAAAATCTGATAT
>LINE_comp2587_g1_i1
ACACCGAAACCAACCTATTTCATTCAGAAATGAACACGCCGCACAATGGTCGACTAATCT
AAAAAGTGAGACAAAAATCAACATTATTTGAAAACTTACTTACGCAGATAAGGCATGCTG
TGTTTTGATTTGGAATTATTTATCTTTGAGGTAGGATGTTAAAATGGGGTAGAACTCCGA
TGACAGTAGTTCCTTGATCTTGATTAGTCGCCCGGTATGGCAGACTTTGCTAAATGGCTG
CGATACGTCCAGAAATGCAG
>LINE_comp2587_g1_i2
GACATACGAGTGCAAAGGGTTAATCTAAAAAGTGAGACAAAAATCAACATTATTTGAAAA
CTTACTTACGCAGATAAGGCATGCTGTGTTTTGATTTGGAATTATTTATCTTTGAGGTAG
GATGTTAAAATGGGGTAGAACTCCGATGACAGTAGTTCCTTGATCTTGATTAGTCGCCCG
GTATGGCAGACTTTGCTAAATGGCTGCGATACGTCCAGAAATGCAG
>LINE_comp2671_g1_i1
ATATGGCCAAACGCCTGACAGCGGTAGCATCTGCCCGCTACGACGTAATGACGAACGTGG
CAGGCTTGCCGCACGACTGGTTCCCTCCGAAACGGGAAGCTCCAGGCCCTAACCTCATCG
GAGTAGAGATGTTCAAAGCCGCCTACCCGGTCCTTATGAGCCACTTCGCCGCCCTATATA
ATGGATGCCTGGCCCACGGATACTTCCCAGCACCGTGGAAGTCGGGCTCCATTCGCACCC
TCCTCAAAGGTCCCGATCGCGACGAGTGTCTTGCCAGTTCCTACAGACCTATTTGCCTGC
TGTCTGTGCTAGACAGTGATCTGGTAAAACTACTCCACAAGAGAATTGAACCGATTTTCC
TCCACCCCGAGTTCGCGTCCCCGTGGCAGTTCTGTTTCCGAAGGGGGAGGTCGACCGCTG
ACGCTATCCTGTGCGTGCGAGATTGCCTCGAGAGGTCAACGACAAAATACGCACTCGCGA
TTTTGTTCGACATCTCGGGGGCTTTCGACCACGTATGGTGGCCCAGTATTCTCCTCCGCC
TGAAAGAGCGGGGCTGCCCCAGTAATTTGTATTCACTGGTCCTCGATTATCTGAACGATC
GTACGGTCTCGCTAATAGGGAAACAATCTCGCGTCGGAAAGTCGGTCTCCAGGGGCTGTC
CTCAGGGCTCTATCCTGGGCCCCAGCCTCTGGAATCTCGTATTCGACGATCTGCTGAATA
CCCTGAGCAGCGAGGGTGTCGAGGCGTTCGCTTATGCGGACGACCTTCTTATTCTCGTCT
CGGGTGACAGCAGACTCGAACTCGAAGAAAAGGGACAGGGCGCGACGACCACCATCGAAA
GATGGTGCAAGTCGGAGAAACTGTCCCTCTCGCAGAACAAGTCGGAGATGATCCTCTTCC
GTGGTCAT
>LINE_comp2763_g1_i1
AGTATACAGAAGATCAACAAGAGCAGCTACGTGAAACTAGTTCCTTATATCCTAAGATTA
TTAATTACTAAAAACTTAGAAATAGCTTTGATGGCCCTCATGTCAGGTCCAATCAGAAAC
GTTTCCGTTTTAAAAGGGGCATTCCATCCTAACATCCGAAGTTCAGTGGTCAAGACAGTT
CTACTTCCATTAAATCTAGGACAATCCCACAGTATATGGCACAGATCCTGAAGCTCAAAT
CCACATTCACAGGAACTGCTACGAATTATGCCCACTCGAGCTAGAGACGCAGCCAGGTTG
TAGTGATTGACTCTGTATCTACTGACCCAAACTGCAGTATGCCTTAACAGATTTCGGTTA
TAAAACCACGGCTTCCTGTTGTGCTCGAAATATGTGTTGAAATAGGCTGAACCCTTGGAT
GCTGCTTCACCAAGCCACGTATTTACGGAATCTTTCCACATAATCTCCCTTAACCCTTTT
AGTGCCGGAGGCCGATATATCGGCTCTT
>LINE_comp2808_g2_i1
AACCTCAAAGTGAGAAACCAAGAGTACTTCGGACCGCAAAGGGTTAAAGAGGCAATTTGA
AACAGCTTGAGCATATAGAATTAATTCTATTATAAACATTAGTTCACTCTACTATAAAGA
TTAGTTCAAGCGAAGAAGACATTCACCAACGCGAGAGTATTGGCTCGTAGAAGGTCACTG
GCACCGTGAATTGTGAAACGCGGTCTCAAGCGGGCCGATCAACGTCAGGAATTTTACGTT
TCGCTTCCAACGGTGCTCCACA
>LINE_comp2889_g1_i1
ACACTGCATTCGCATCCATACCAACTATTAACCTCTTTCCCCTCAATCGCTCACGCACAC
ACTCCAAGTATTGCAGGTACGGACCAATTTCTTGGCCGTACCTGCAATACACAGAAATCA
CATACACCTCTCCAAAATCCCCCTTCATCCACACACACACACCATATTCACTCGTACACT
CTCTCACACACATAGACTCCACACGATCATCATTCACTACAATAGCGGCCTTCTTCTGGC
TCGCTTCACATACATACACATTCATACCAGCGGGCAAGCCTTTCACACACCCATCCACAG
CGACATACGGCTCCTGTAGTATGCCTACACTCACTCGATTCTCATTCATTACTACACCCA
AATCACACATCACCGCATATGCCCGCTGACAATTACACTGGATCGCA
>LINE_comp2929_g1_i1
GCAACTTACACGCACGCCAACGCACATACACTCTTCCTTCATTTATTAACTTATTATACA
TACACACACTCAACTCAAATACCACATTACCTACATTCGCATCCTTTTTGTTACTTCTAC
TCACCACACGCACTTGCTCTCTGAATTCTCTTTCACTCACACATTCTCTCAAGTTCTTCT
CATACATCTCACTCATTAACTCGTCACTCGTCATCTCCACAGGCACATCAAACACAATCA
CCTTCGGACCAATCTTCCGAGGCTCATCCACACGCATTCCAATCGCATCAAATTTCTTAC
ATTCATGCATCCGTTTTACCTCACTCTCACTAACCGTCTTGACGGCAATACCTCCACTAC
GCGTCTTTCGTACGGCTTTTACTCTGACATTCAAACTCTTACTCATCTCATTCAACACTC
GTTCCTTTACTTGTTCACTCGTTAATTTCGCATTCTCATCCTTAGGCTTTATCACAACTG
CATACTTCTTTTCACTCACTCTCATCGGCACATTCACACTAGGTTTCGCAGGCACACTCT
TTTTTGAACCAACCATACTGGCATACGATTTCTCAGGCACACACACATTCTGGACGGGTA
CACTCATTACATTCCTGCATTCATCCAACCGGCCTTTCAATCTCTCGTTTTCACACATCA
GTCGAACCAAGCACTCCTCGTATTCACTCGCACAACTCAAAATATTCTCAATCACACTCT
TGTTAACCTTACTCGTCTCCGCAAACATACATTTTCGCAATCTCTCACCAATCGCACGCA
TTCTCACACATTCATCTTTTTCTACATGCACATCCTCACGCACAATTGTACAGACACTCG
CACTCAAATCTCGATTACCCGTTAAATTTCCACTCACACCCTTATCACTACAACATTCAC
TCATTGATTCACACTCACTCGCATCATCTTCATCATTCATTCGGCGCTTCTTCGAACTCG
CGCTCGAGTCGCGACTCTCACTACGCCTCCTTAAGCTTACGCTTCTGCTTCTGGAGGTGG
AAGCCTCCACTCCAGTCGAGGTGCTAGCACGGCTAGCCCTCTCAGTTTCTCCTATTACTT
CCTTCTCCTTCTCGGCCTTCTTCCTCCCTCCTTTCCCTCTCCCCTTCCCCTCCTCAACCC
CAA
>LINE_comp2932_g1_i1
CCGCCGCTGCGCGGACCGGGACTTCCCGGTGCCGTGAGCAGCCGCACACGCCGTTCCACC
CATACGGTGGACGGCGTCCAACCCCTTCTCCGCGCAGAGAAGGCATTTCGGTGCCTCTCT
GCAGGACGCCGCGCGGTGGTCGGCGGAGCCGCACCTAAAACAGCGGTCTCCCCGCTCGAC
CGCGGCAGTGCACCGCAGCCTCACGTGACCAAACGCAAGGCAGCGGTAGCACTGCAGCGG
C
>LINE_comp3095_g1_i1
CTCGTCAGTGAGCTCACTGACGAGCATGGAGTGTGTGTGTGGATGAAGGGGGACTTTGGC
GAGATGTATGTTGTGTCCGTGTATTGTAGGTACGGCCAGGACCTGGAACCGTACCTGGCC
TATCTGGAGCGTGTGCGTGTGAGACTGAGGGGAAAGAGTTTGCTTATAGGTATGGATGCG
AATGCAGTGTCACCCTTGTGGTTTAGCAAGGGTGACCTGCATTCAAGAGAGAGTGTGATG
CGTGGTGAGATGATGGAAGAATGGATAATTGGGAATGGAATGAATGTGCTGAATGAACCG
AGTGAATGTTATACGTTTTCGAGTGTGCATGGCCAGAGTGACATTGATGTCACTCTG
>LINE_comp3099_g2_i1
ATCATTTGCTTTAGAGAGGAACACTGAGAGATTCCTGGGTGCTCAAAGATGATCGTTAAC
ACTACAACTGCCAGGTATGTCAAAACGAGCAATTCTTAATTTCTGTTACAACTGCTGCAA
AGGTATAGCTTTGAGGAACGATCGAAGAAGCTGATTCGGTAATAGCTAAATTGAAGTATA
CATACCGGATAGTACAACATACAAGGGTTAACGCTTTACTC
>LINE_comp3129_g1_i1
ACTATGCAAGCGTGAGAATACCAACATTTATAAATAAAAACAATTTTTCTTTACTATGTT
ACATTTTCATTTCAAGAGGCGATCAATTATATTTATCTTTTTCAAGGATGTACTCATTGT
TTACGTACAGTATTGCTCTTGTTACACTCAGAAGAGTGTAAAAATCGAACAAAGTGTTTG
ATGTTATATAGTTTTTGTCAAGACTGAACCTGTTTCTAACACAAATTGTGAGAAATTATA
CACGTCGAACAATTCCGAACGGATACATGGGGGAGAGTAGTGTAAAACGGAACACCAAAG
TTTTTCGTAGATAGCGTGCTCGTGTCAAGCTAGAGACGCTTGACATAGACGTAATAAGTC
TAATAAAGTTATTCAGTGAAAAAATTGGATGTTATACATTTAAACTTTAGATTAAAAAAT
TGCAAACGGTAACTGTAGTACTGAATATAATTCCTTAATCCGCCCCTTTCACATGTAAGA
CGTTTCTTTATTTCAGGCTGACGTTTAGATTTAAAATTTTGTCTACATTACGGCCCGCGG
GTCGAAAGGAACATTTTAGTGTGGTGTAAAACGCTACTGTTTATGTACAAAGAAGAATAG
GAAATGCCATTAATTGTTGTATGCTGCATCGTAGTGTGGGAGTGAGTAAATAAATAAACG
CGTATGTCTGTTCTTTTGCTCTTGGGATCGCTAAAAACGGGATCGGACACGAGTCAGTCA
CAAAGTTATTTATTTTATTTATGTTACCGTCACCTGCTTATGTAAAAAAATTTAAAATGA
ACAATGAGAATGGTAGTCTCAAAACAGCAAAATGTAAAAAATAAAGAAAAGAAAAGAAGA
AAGCCATTTTCGGAAAGAAAATAAAAAAGAGACAACATGAATTCTAAAAAATCTTTTAGT
TATATAAAAGAAGAATGAATTTAGTGCCTACAGTGTCAACGCTGGGCCTATGAATATTTC
ACCAGTGCAGGAAAGCAAAATGACACATTCATTTGTGATTTTTGTTTACAAAATAAACTA
TACTTACAGCCTATTTATGTCAGTTAATAATTTTCAATGGAGAAAAATAAATGTTTCGTA
TTTGCACGTGGCTTTAAATGGATGTTCCGTTTTACCCTACCATTTTCGCGAAGAGGATAT
TTCAAGTCTTTGACAAATGCTTCTTCCCTTCGTAACTTGATATATTCCTTCGAAAAGTCT
TGTATTTCCTTATCGCCAAAGGTCCACTTAAGAGTTCCAAAAAAAATTTCAAAAGATTTC
GTCTATTACACGAGGTATTTTGTTATTGCATTTTAAAAAGAACCGTTCCATTTTACCCTA
CCTTCCCCTACTTCTCTCGATAGATAAGCTGTTTTACTATGCTTTACAAAAGCATCATGA
CTAGAAAATAAAATAGTGATCGGAGGCCCGATACCCAGAGAAGTGTATTCCGAATAATAC
GAACACTGCTTGAAGTTTATTAGTCGATTTCGTGAAAAACACGGATGAAGTTTCAATATA
CTTACAGTTTTCTACTTTCTTTTCTACTTTCGCCTTCCACAATGAAATTCGATTTAGGTT
TATATAAGGTTAACTTTCTTACTGACGTTTCTGAGTCGATAATACATTTAATTTTTAACA
CATCTAACATATTCATCTTTTTAAGTCTGGCGGTTTCATTGTGTTTCCAGTGTGGCTGGC
CTCTAATTTATTACATTAAACAATTTTCTGATTTCGTTACTTTCTCGAATACGACTTGCA
AATGCTTTTAAGTGTTTTCAATTTTAATTTGAAAAGTTGAAAGTATTTTACTATCGATGT
CTGCAGAAATATTCGACTTTTTATACTTGTTACACGAGAATCCTTCCTTAACAATT
>LINE_comp3176_g1_i1
CCCCTGTGGGCACCCACGCTCAACATTCTTCCAGACAACCTCATTCACTCCCTCCATACA
TACAACACGATCCTTGAAATAGTCCATCCATAGCCCAATCTCTTCACAACCATACTCATT
CAACTTCTCAATCACTCTCATCCATTCTAGATTATCAAACGCTCCTTTGAAATCTACAAA
CACACCCAAAACATACTTGCACTCACTCTGTTCCACATACTCTTTCACTCTTCTCCAAGC
ACTCTCGGTGGACCGACCCCTC
>LINE_comp3194_g1_i1
GCGGCTGTACGCGGGGGTGGTGCGGAGTATCGTACTCTACGGCGCGCCCATCTTCGCCGA
CGACCTGGTGGCGGACAAGTCTACCCGGCTCCTTTTGGGCCGGCTGCACAGATTGTCCGC
CATCAGGATCGTGAGGGGATACCGCACCCTCTCGGGTACAGTGGCGGCGGTCCTGGCGGG
GTTCCCTCCCTTTGACCTTCAGGCCATCGCCCTGCGAAATATTTATCTCCGGACGAAGTC
TGAGGCCGG
>LINE_comp3254_g1_i1
GAATAGCTTTCTCACCTCGTCGAGCAAACAAATCGGCCTATACGCCGAGGGCATCCCGGC
AGGCCTCCCAGGCTTACCCATGAGGGTCAGCCGAGCCGCCTTCCAATCCCGCGGATATTG
CCCGCGGGCCAGGCAGCTGTTAAACAACCGCCTGACCCGTGGGGTGAGGGCCTCCATCGT
CGCGCCCTGGGCGCGCCCAGGCAATCCGTCCGGCCCAGGCAAGACTTTCTTGGCACACAT
GCGTTTAACCGTTTTCTCGAGCTCTTCGTTGCCAATTTCGAGCTCTCTCGTCCACCCACC
TGTAGCCGGGACGTTATTAAACAGTCCACGGGGGAGAGGTGGGGCGTACCGTCCCCCTCT
GGGAACAATGTCCGGACCACGCTGATGAGTGTCCGGACGTCCATACTCTCCGTCCTTGGG
GGGGCCCGGGGCCTGAGCCTCCCCAAGATGAGCCTGTACGCCCGACCCCACGGATC
>LINE_comp3328_g1_i1
CCACACACACACTCCAAATTCATTTGTACATTCATTCACACACACACAGCATCTATACAT
TCATACCTTACGACCACCGCAGCCCTCCGGGTTCCTCCGAACTGGAGAACATCCGCCAGG
CCGACGGCAGTCCTCTCACGCATCCCTCATTCACATACAACTCTTGCAACAATGCCAAAC
TCACGCCCCTTTCACACATGACATTTCCTAAATCACACAGAACCACATACGCATGCTGCC
AATTTAACTACAATACATTCACATAACACTCAGTCATCGCATACACGCATCCTCTCTCTC
TCCACTATCCTCACATATTCGGGGCACTCCGTGGACATAACCGGGTGGTCACCCTTTCTC
CCCTTCAGCTTGCAATTCCTGCAAACACTGTCACTCCAGCACTTATCCCTTAAGTGCCCA
CTCTCTCCGTATTTCTCACACAAACGCTCTTTTACACTGCACGCTCTCATCATGTGCCGG
AATGCAAAACACCTGAAGCACCTCATTACACTCACGAAATCTTTAACTTTACATGCACGC
CAGTTGATGTACACGCGTTCTTCATTCATCAATACATCCCTCATCCTTTTACTTATTTCC
ACAATCACATTCCCTACATTCATTCCATTCGTACTCGTTCGATTCACCACTCGCACTCTC
TCACTGAATTCTTTCTCATTTACCCCCTCATTCTTAAAATTCTTCACATACAATTCGTTC
AGCAGGCCCTCATTAGTCATATCATTCTCTACGTCAAAGATGATGACTTTCGGTCCCATC
TTTCTTGGGGCCTCTACCTTGAATCCCAAGTTAGCAAACTTTTTACACTCAATCAACATG
TTCACTTCATTCTCACTGGCCCCCTCAATGGCAAGCCCTCCACTTCTCGTTTTCCGCACA
GCACGCACACGTATATTTAACTCACCACTCACATTTTCAACACTTTCTGCTTTACTTCCT
CATTCGTCAATTTCACACTTTCGTCCTTCGCTTTCACAACGACCGCGTACGATTTAGCAC
GCGGCCTTACACTCATACTCTGGCTTGATCCACTTGTCATCGCACTCACACTACTAGTTA
CTCTCTCTGCCACTCCTGCATAGGAGACCGGTCGCGCCTCACTCACACGCTGCACACACT
CACTCACTCTCTGATCCAAATACTTCTCGCATTCACTCAGTCTACCACTCAGTCTCTCAT
TCTTTCTTATCATGCTTACCATTGCTTTCTCGTACTCAGCAGCGCATCCCAAGAAGAACT
CGATACACTGCTTTGTGACTCGGTTGCTCTCCTCAAAAGAAAACTTCCTCATTTTACTCG
TTGTCTCACGCATTCTCTCTAGTTCACTCACACACTCCTTAGCACACGCACTCGCACTCA
CACCACCACTCGTGCCAGGAACAACCCCAACCTCTCCCAAGCCGGAAGCCGTCCTTTTTA
CCCGTTTGACCGGGCTTGCACTCCTGGGCACTAATGTCCTTCCCTTTGCGGAAGGTGGAC
GCATCATCACCACCTCCTGCACCTCCCCCTCCTTCTGCTACCACCCCAAAATATCCCCAA
GTTTTATTTTCGATTTATCCATATAAATCCCACGAGATGGGTCAATAATATGTCCCTCCG
TGCTCCCACCAGCCACGTATCCACAGTGTTAGTGC
>LINE_comp3344_g1_i2
CTGGGGCAAGTAGATAGGGACAGAATGTGTCCGTTGTATTTTACGTGCCCGTACCCACCA
TTACGGTCTAACAGACACGGCCCCCATGGGCGCGGGGTTGGGATACGCCCAACCAGCGGG
CCCCCGAAGAGAGGTCTCCCCAGGGACTACCAGATTCGTCATCGGGGTGCAAGCCCCGAC
GACACCCTTGGTCTGGGCCGGGACCTTTCTAACATCCCTACCGGCTAAGCAGGCCGGCAC
CCGAGCTGTTGGCGACGCAGCTCACCCGCCGGGATGACACGCCCTTGCGGACGCGCACCC
CTAGCCTGCGACGTAGGCTGTACCACTGCCCCCGCGAGTCCAACCCAAGTGGTCAACACC
GGAGGGAAATTCCCTCCGGGGGCTCACGTCAACCCCCGCGGTACCAGTGAAGAAGGCCGT
ACTGGTATGCCTGTCGTGGAACCAATCCACTTCCCATTGGGGCCCTTGCAGACCCCGACT
TGGGTGAAGCTGACTCGGATACGTAGGGTCGTCACTCCCCAAAGGCCGTTGGGTGCTGGC
CCGCCAGCCTTCCTGCGACCTCGGCATACCATACTTATCCATTCACTCTCACAATCATTC
GTCTCCTTTCAAACACACTTCTCGCAAACATATTAAAACATTCATACGTTGCCTTACACT
AAAGCACACGACTCACATTCATACTTCCATCAGCATTCACAGTCACACCACATTCACTTG
AGTTTCCCAAATCATCATACATTCCACATACATCTCGCACCCTCACTAAGTCCACGTTTA
TTCAAAAATCCATTCATACTTCCATCCCCTGTCATTAAAAAGCATACATACACACTTGGG
TCGAACCAGGTACGCGCCTCAGCCATTCTTACATCTCTCATATATTCATACAACACTCGC
CCTTTCACACATTCATCCCACCTGGCCTGCCATCGATCATTCATTCTCCCATTCACGAGG
TCTATTTTCTCATTCATCGTCATTCCATTCATTTCGTCCATACATACCAGCTCATTTTCA
CACAAATCCCAACCATTCTTAATCATACACACTAGA
>LINE_comp3344_g1_i3
TATGGTAGAAACGCGGAATGAGGAAACAGCGAAGGAACTTGAGACGCTGTTGAGGCTTGA
GTGGTGCTTCTTGGAAACGCAGCTCACCCGCCGGGATGTCACGTCATAATGGTGACGCGC
ATCCCTAGCCTGCGATATAGGCTTACCACTGCCCCCGCGAGTCCAACCCAAGTGGTCAAC
ACCGGAGGGAAATTCCCTCCGGGGGCTCACGTCAACCCCCGCGGTACCAGTGAAGAAGGC
CGTACTGGTATGCCTGTCGTGGAACCAATCCACTTCCCATTGGGGCCCTTGCAGACCCCG
ACTTGGGTGAAGCTGACTCGGATACGTAGGGTCGTCACTCCCCAAAGGCCGTTGGGTGCT
GGCCCGCCAGCCTTCCTGCGACCTCGGCATACCATACTTATCCATTCACTCTCACAATCA
TTCGTCTCCTTTCAAACACACTTCTCGCAAACATATTAAAACATTCATACGTTGCCTTAC
ACTAAAGCACACGACTCACATTCATACTTCCATCAGCATTCACAGTCACACCACATTCAC
TTGAGTTTCCCAAATCATCATACATTCCACATACATCTCGCACCCTCACTAAGTCCACGT
TTATTCAAAAATCCATTCATACTTCCATCCCCTGTCATTAAAAAGCATACATACACACTT
GGGTCGAACCAGGTACGCGCCTCAGCCATTCTTACATCTCTCATATATTCATACAACACT
CGCCCTTTCACACATTCATCCCACCTGGCCTGCCATCGATCATTCATTCTCCCATTCACG
AGGTCTATTTTCTCATTCATCGTCATTCCATTCATTTCGTCCATACATACCAGCTCATTT
TCACACAAATCCCAACCATTCTTAATCATACACACTAGA
>LINE_comp3359_g1_i1
CTTCCGAGGTTCATCCACTCTCATACCAATCGCATCGAACTTTTTACATTCACGCATTCT
TTTTACCTCATTTTCACTGACCGTCTCGACGGCTATACCTCCACTCCTCGTCTTTCGTAC
CGCTTTCACTCTCACATTCAAACTTTTACTGACTTCACTCATCACACGCTCTTTCACTTG
CTCACTCGTAAGTTTAACACTGTCGTCCTTAGGTTTTATGACTACAGCGTACTTTTTCTC
ACTCACACGCATCGGCACATTCACACTTTTCGCACTCGCACTCACACTTGGTCTCATACT
CGCAACACTCGCAAAACTTTTCCCATTCACACCAACACTCTGGACGGGTACACTCTTATT
CCTCTTACATTCTTCCAACCGACCTTTCAATCGCTCATTCTCACACACAAGACGCATCAA
ACACTGTTCATACTCGCTAACACAATTTAATACATACTCACTCACACCTTTCATAACTCT
ATTACCATCCAAAAACAAACATTTACGCAAACGTTCACCTATGTCGCGCATACAAGACAA
TTCATTCTTTTCATTCATACCTTCGCCACGAACAATCGTGGCTACACTCGCACTCAACTC
ATGTGACACACCCATACCCACACGCACACTATCTTCACACTCACTCATACTACCATCATC
TTCACTCACACATTCATTCCCATCTTTCCGCCTCCTCTTCGAGCTGGTGCTCGAGTCGCG
GCTACCACTCTTCCGCCTCAAACTCACACTCCTACTGCGAGATGAGGTGGAAGCCTCTTC
CAAGGTGCTAGCCGCACGGCTAGCCCTTTCTGTCTCCGCCTTCCCCTCCTTCTCACCCTT
CGTCTTCCCACCTTTTCCTCTCCCCTTCCCCTCCTCATCCCTATGATCGTCTTTAAATTT
ATTTTGTTTTTTCGAG
>LINE_comp3359_g2_i1
GGGACACTCCAAGGACGTCACCGAGTGGTCACACTTATTCCCCTTGCTTTTACAATTACG
ACAACATACGCTCTTAGAACACGCACTCTTCAAATGACCACTCTCACCACATTTCTGACA
ACACGCATCCTTCTCCTTGCACTCCTTGGCCATATGACCAAACGCGCAACATTTATGACA
TCTAAGGACGTTCACAAATTCTCGTAATTTACATGCACGCCATCCAATATACATACGACC
CTCATTCATCAAAACATTGTACATTCTCACACTAAGCTCAATCACTACATTACCAATACT
TGCATCCTTTTTGTTTGTTCGACTCACTACACGCACACGCTCACGAAACTCTTTCTCATT
CACACACTCTTTAAGGTTTTTCACATATAACTCACTCAACAACTCTTCACTCGGTATCTC
AACAGGCACATCATATACAATCACCTTTGGTCCAATCTTTCTCGGCTCATCCACTCTCAT
TCCAATAGCTTCGAACTTCTTACATTCACGCATCTTTTTAATCTCATTCTCGCTTACCGT
CTCGACGGCAATACCACCATTCCTAGTTTTACGCACGGCTTTCACTCTTACATTCAACGA
CTTGCTCACTTCTTTCATAACCCGCTCTTTCACTTCTTCGCTACTCATC
>LINE_comp3359_g3_i1
TACTCAGCCATTATTCAACACTTATCCTCATTCTTTCACGCTCAAGCATTCTCTTGTACT
CCGGACACTCAAGGGACGTAACAGAATGGTCACACTTGCTCCCTTTCAACTTGCAGTTCC
GACAACATTCATCTTTCTTGCAGTCACTCTTCAAATGTCCACTCATACCACACTTCTGAC
ACACGCTCTCTTTTTCCTTACACTCTTTGGCCATGTGCCCGAACGCACAGCACTTATGGC
ACCTTAAAACACTCACAAACTCACGCAATTTGCACGCTCGCCATCTTACATACACTCTTC
CTTCATTCATCAATCTGTTGTACATACACACACTCAATTCAAACACAACGTTATCAACGT
TCGCATCCTTCTTATTTCTTCTATTCACAACACGCACACGCTCTCTAAATTCTCTTTCAC
TCACGCATTCACTCAGGTTCTTTTCGCACAGCTCACTCATCAATTCATCACTAGTCATCT
CAACAGGCACATCAAACACTATAACCTTCGGACCAATCTTCCGAGGTTCATCCACACGCA
TACCAATCGCTTCAAACTTCTTACATTCACGCATCTTTCGCACTTCATTCTCACTTACCG
TCTCGACGGCAATGCCTCCACTGCGGGTTTTCCTCACCGCTTTCACTCGCACATTTAAAC
TCTTACTCACTTCATTCAGTACACGCTCTTTCACTTGCTCGCTAGTTAGTTTCATACTCT
CATCCTTCGGCTTTATTACCACCGCATACTTCTTTTCAGACACTCTCATCGGCACATTCA
CACTCTTGGCATTCACACTCACACTAGGTTTCATACTCGCTACACTTGCAAACGATTTCC
CATTCATACCTACAGACTGGACGGGCACAGATTCATTCTT
>LINE_comp3359_g4_i1
ATCCCCCTTGATCCACACACACACACCGAATTCGTTGGTACACTCACGCACACACATAGA
CTCAATACACTCACCATTCACAACTACGGCGGCCTTCTTTGGGCCCACCTCTGAAACATA
TACATTCATACTCGCAGGCAAACCTTTTACGCATCCATCCACTGCCACATACGGCTCCTG
TATTATGGCAACATTCACTCTCTTCTCACTCATCAACGCACCCAAATCACACATTACCGC
ATACGCTCGTTGACAGTTGCACTGGATCGTATGTAACATACATTCAGCCATTTATTCAGC
ATTTATCCTCATTCGTTCCCGCTCTACCATTCTCACATATTCCGGGCACTCCGAAGACGT
AACCGAGTGGTTGCTCTTATGCCCTTTCATTCTACAATTTCTGCAGCACTCATCCTTCTT
ACATACATTCCTCAGGTGGCCACTCTCGCCACACTTCTGGCACACGCTCTCCTTTTCTTT
ACACTCCTTCGCCATATGCCCAAACGCGCAGCATTTGTGGCAACGGAGCACACTCACAAA
CTCTCTAAGCTTACATGCCTTCCATCCTACATACATACGTCCTTCAGCAATCATCCTATT
CCACATTCGCACACCCATTTCGAAAATCACATTTCCCACACACGCATCTTTTTTGTTAGA
CCGGCTAACAACACGCACACTTTTCTTGAATTCATTCTCACTCACGCATTCCTTTAAGTT
CTTCTCATACAATTCCTTCAGAAGTTCTTCGGTTGGCATCTCACAAGGGACGTCGAAGAC
GATCACCTTCGCCCCGATCTTCCTGGGTTCGTCAACCTTCATGCCTATTTCCTCGAACTT
CTTGCATTCTCTCATGCGCTGCATCTCACTTGCACTCACCGTTTCGACGGCTATGCCCCC
ACTTCTCGTCTTTCGCACCGCTTTCACTCTCACATTTAAGCACTTACTCACTTCACTCAT
TACTTTCGCTTTCACTTCATCACTCGTCATACGCACATTCTCGTCCTTAGGTTTGATAAC
AACAGCAAACCTAGGCTCATTCACTCGCAACACTGGTTCACGTACACTCACCTTAGCACT
CTCATTCACACCCTTCTTAGATCCTAACACACTCGCAAAGGATCTCACACTCGTTCCCTG
GACGGGTCTACATACATTCAAACTTTCACGCTTCTCACATTCATCCAATCGACCCTTCAG
TCGCTCATTCTCACACATAAGTTTTACCACACACTGCTCATACTCACTCATGCATCCCAA
CACAATCTCACTAACACTCTTACTGACTCGACTACTATCACTCAAGACACACTTTCTCAC
ACGCTCACCTATCACACGCATCACACTCATCACATCTTTCTCTACATCACACTCACGCAC
AGTCATTACACTCGCACTCAGATCCGCGGCCACATTCAGTTCACCACGCACACTCTCATT
GTCACTCATTTCGCATTCACTCACATCCACACATTCATCAGTCCTTGCGCGCTTCGACCC
CGTACTGCTGTCGCGGCTGTTGCGACGCCGACGCACGCTTACGCTACGGCTGCGCGAGGC
AGAAGTCGTCGCCTCATCGGCGCGACTACTCCTCGCCTCTTCCACCGTTTCGTCTTTCCT
CTCCTTTTTCTCCTCCTTTTTCCCCTCCTTCCGTTCCGTCTTTTTCCCCTTCTCCCCAAT
AATTGTTTTTAATGAATATTTCTTTTCCATAATATTCCCACGAGCGGGGTCGAACTATAC
GTCGCCACGTGGGGTGACGCCCATTCCCACGTGGAAGGCTACTACTCACGGGATTCGCCA
GGTGTCCCGCGGGGGGCCGCTAAGGACCGGTGCACCCACCGGCCACG
>LINE_comp3359_g2_i2
CGACACTGCATTCGCATCCATTCCAACCAACAACCTCTTTCCCCTCGTTCTCTCACGCAC
ACACTCCAGGTACGCAAGGTACGGCTCTAAATCTTGTCCGTACCTGCAATATACAGACAC
AACAAACGCTTCGCCGAAATCCCCCTTTATCCATACACACACACCACATTCATTCGTACA
TTCTCTCACGCACATCGATTCCATTCGCTCACCATTCACGACCACGGCGGCCTTTTTGTG
GCCCACCTCAGTCACATAAACATTCATACAAGCAGGCAAACCTTTGACACATCCATCCAC
TGCCACATACGGCTCCTGTATGATGGCCACATTCACACGTTTCTCACACATCAACACACC
CAAGTCACACATTACAGCATACGCTCTCTGACAGTTACACTGGATCGTGTTCAATTCACA
TTCAGCCATTATTCCATGCATATCCTCATTCTCTCACGCTCAACCATTCGTGCATACTCG
GGACACTCCAGGGACGTCACCGAGTGGTCGCTCTTGTTGCCCTTCACTTTACAGTTTCTG
CAACACACACTCTTACTACATGCACTCTTCAAATGTCCACTCTCTCCACATTTTTGGCAA
CATGCATCCTTCTCCTTGCACTCCTTGGCCATATGACCAAACGCGCAACATTTATGACAC
CGCAGGACATTCACAAATTCACGCAACTTACATGCACGCCATCCAATATACATTCTACCC
TCATTCATCAACACATTATACATTCTCACACTCAACTCAATCACAACATTCCCAATACTC
GCATCCTTTTTGTTCGTTCGACTCACTACACGCACACGCTCACGAAACTCTTTCTCATTC
ACACACTCTTTAAGGTTTTTCACATATAACTCACTCAACAACTCTTCACTCGGTATCTCA
ACAGGCACATCATATACAATCACCTTTGGTCCAATCTTTCTCGGCTCATCCACTCTCATA
CCTATAGCTTCAAATTTTTTACATTCACGCATCTTTTTGATTTCACTCTCACTCACCGTC
TCGACGGCAATACCACCATTCCTAGTTTTTCTTACAGCTTTCACTCTAACATTCAACGAC
TTACTTACTTCTTTCATGACACGCTCTTTCACTTCCTCACTGCTCATTTTCACACTTTCA
TCCCTCGGCTTGATCACCACAGCATACTTCTTTTCAGGCACTCTTACCACAGGCACATTC
ACACCGGTTTTTACAGGCACACTCTTCTTTGTTCCAACCATACTTGCATACGATCTTTCA
TTCACACAGACATTCTGGACGGGTACATTCACAAGATCGGAAGAGCACACGT
>LINE_comp3359_g5_i1
CTCTTGTATGATGCCTACACTCACTCGTCTCACACTCATCAATACACCCAAATCACTCAT
AACCGCATACGCTCGTTGGCAATTACACTGGATCGTGTTTAACATACATACAGCCATTAT
TCAACACTTATTCTCATTCGTTCACGCTCAAGCATTCTCTTATACTCTGGACATTCAAGG
GACGTCACCGAATGGTTGCTCTTACTCCCTTTCAACTTACAATTACGACAGCATTCATCC
TTTTTGCATTCACTCTTAAGATGACCACTCATTCCACATCTTTGGCATACACTCTCTTTC
TCTTTACATTCCTTGGCCATATGCCCGAATGCACAACATTTATGACACCGTAATACACTA
ACAAACTCACGCAACTTACAGGCTCTCCATCCTACATACATTCTTCCCTCTTGCATCATT
CTGTTATACATACACACACTCATTTCGAACACCACATTCCCAACACTCGCATCCTTTTTG
TTAGTTCTACTAACCACTCTCACACGCTCTCTAAATTCTTTCTCATTCACGCACTCATTC
AGATTCTTCTCATACAACTCTTTCATCAACTCATCACTCGTCATTTCCACAGGCACATCA
AACACTATAACCTTCGGACCAATCTTCCGAGGTTCATCCACACGCATACCAATCGCTTCA
AACTTTTTACATTCACGCATCTTTCGCACTTCATTCTCACTTACCGTCTCGACGGCAATA
CCTCCGCTACGCGTTTTCCTAACCGCTTTTACTCGCACATTCAAACTCTTGCTCACTTCA
CTCATCACACGCTCTTTCACTTGCTCACTACTCATTTTCACACTCTCATCTTTTGGTTTG
ATAACCACCGCATACTTTTTCTCAGGCACTCTCATCGGCACATTCACACTTTTTACATAG
ATCGGAAGAGCACACGTCT
>LINE_comp3368_g5_i1
CACGACGCTCTTCCGATCTTCATAATTCTCATTATAAATATGGAAATATTTTTCTGACTA
CTTAATTCTGCAACAGATACTGTACGTGCATCGGAAACGTGTATGAACTAGATATCAACT
TGGTCTGATTATAGCGGACGCATACTACTTACTGATCTGTATTTAACAAAAACGAAGGAA
TTCCTTTGCGTCCCCTTAACCAGTTAACTGTGGACTTTAGTTTGAAAAATCTCTCGTTTC
GCGCGTAGTAAAATCAAAA
>LINE_comp3376_g2_i1
TGCGAGGAAATTGGGTTATGGATGGATTATTTTTCGGATCGTATTGTTTGTATGGAGGGA
GTGAATGAGTGTGTGTGGAAGAATGTAGAACGCGGGTGCCCACAGGGGTCCATAAGTGGT
CCATTCATATGGAACCTACTTATGGATGACCTCCTGTGGGCACTGAGTGAGTGTGGGTGT
GAATGTGTAGCGTATGCAGATGATTTGGTTATGATTGTGAAAGGACGGAACCGAATGGAT
TTAGAGCGAAAGGGAACAGAGTGGATGAAAATTGTGAGTGATTGGGGTATGAAAGTTGGC
GTGAGTGTCTCTGAGCGAAAGAGTGTGTGTATG
>LINE_comp3382_g2_i6
TGTCAGTCACCGATGACCGACGCTTCTAAATTACTTGAAAAAAATTACAATATGCAAGAT
GACTGCTGTCGACTAAAAATATTTAATAACATAAATAAGTTAACAATAGCGTAACGTAAG
ATTTCTGATGCCAAATAATTAATAATTGTTCCTATTTACCTTTGCTACGAAGGAACAAAT
CATGTATAAATCGTTCAAGATTCTCATGGCGCGTAACGTGTTAAATAGCTGTTGTTCTTG
GGGAAAATGTAACAGTCTCCCTTTCATCGTGGGCAGCGTGGATTTTCCAACGCGTGGCTC
ATGTGGTCACCAGGCGTTAGGCTCGCGCGACCGGAACAATGAAACGCGGCGAATACGATG
CGAGTCACGCCGATCATG
>LINE_comp3394_g1_i1
GTATGGTGCGAGTGTGTGGTGTGAGAGCATGAAGTATGGGTATGCGAGGGAAATGATGAA
TAGATGTCAGCGAATGGTGATGTATGCATGTTTGAATGTATGTAGAACGGTAGCGACTGA
GAGTATGAATGTATTAATGGGGGTCCCACCTTGGGACTTGGAGTGTGTGAGACGAGGCCT
GGTATGCATGATTAAGAACGGATGGGACATATGTGAGAATGAGTTGATAAGCGTGGATGA
AATGAATGGAATGACGATGGATGAGTGTATTGGCCTCGTCAATGAGAGAATGTATACTCG
ATGGCAAGCCAGATGGGATGAATGTGAGAAAGGAAGAGTGTTGTATGAGTTTGTGAAGAA
TGTAAGGTTTGCTGAATGTAACTGGTTTGACCCGAGTGTGTATGCGTGCATGATTATGAC
TGGACATGGGAGTTTGAATGAGTTTTTGTACAAGCGTGGTTTGAGTGAGAGTGAAAGATG
TATGTGTGGGGCTGCGCGTGAGGACTGGATGCATGTGTTGATTGAGTGTCGAATGTATGA
GGATTTGAGAAACCTGAGTGAATGTGGAGG
>LINE_comp3394_g2_i1
GTATGGTGCGAGTGTGTGGTGTGAGAGCATGAAGTATGGGTATGCGAGGGAAATGATGAA
TAGATGTCAGCGAATGGTGATGTATGCCTGTTTGAATGTATGTCGTACCGTGGCGACTGA
AAGCATGCAGGTCCTCATGGGGGCCCTACCCTGGGACCTTGAGTGTATGAGACGAGGTCT
GGTATGTATGATTAAGAATGGATGGGATATATGCGAGAACGATTTTGTATGCATGGAAGA
TTTGAATGAGAAGACCGTGGATGAAAGGATAGACCTCGTGAATGAAAGAGTATATTCTCG
ATGGCAAGCCAGATGGAATGAAT
>LINE_comp3405_g1_i1
AAATAATAAATAAATAAATAAATAGATAAATAAATAAACTGGGATAAAAAAATCAGAAAT
ATAAAAAAATTAAAGAAAAATAAAAGAAAGAGTACCAAATTGATGAATAATTAGAACCAG
TGTCACATCACTAATTAAGAAATCGTTACCAAATCTCGTAGTTAGTTCAGAAAGAAAAAA
TAAACAGATATGTAAATAAATATGTAAATAAATAAATATGTAGATGAATAAATATGTACA
TAGATAAATATGTAAATAAATAAATGTTTACATAAATAAATAAATACGTAAGTAGAATGA
AAGAAAAAAGAAAAAAATATGTAACTAAACAGATAAATATATCGTTAGTCAGTATGTTTG
AAATGGTTAAGTAAATAGATAAATAAAAACCAGGAAAAGAATATAATTAAATGAGTTAAT
AACTAAATAAATAAGTAGTTAAATAAACAGAGTAAGATAGATAGAACATTAATAGTTATA
TAGACGAAATGATAAATAAATGGCCATAAGGCCGAGAAGCGAACTCGATGTGTGTTATGA
GAGTACACTTTGATCTCAGCCATA
>LINE_comp3407_g1_i1
TTAAACAGAAGTAGAAATATAATAAGTAAATTAGTTAAAAATCCAGATCTTTATGGCAGA
AGAAAGAGTTCTGAACAACAACTGTTCTATCATTACGACAAAAGCGTGCAGAGGGAAGTC
CGATTATTCTCCAAGTTCCTGCCGCGAAGGCTTACCAAGGAGAGCCCCCATGGGCGAGGG
ATTGAGATTAAGCTCAATCAGCTGAGGCCGTAGCCTTACTAGCGTTGCTTCCCGAGGATG
ACGAGTCCCATGGAAGTAGGCTGTGGGTACCGAGATCACATTTCACACATCT
>LINE_comp3407_g2_i2
GACGTCGTCGTCGTCGTCGTCGTCGCCGTCGCCGTCGTCGTCGTCGTCGCCGGGGCCGTC
GGGGTCGGCGGCGGCGCCGCGGGCGGCGGCGGGGTCGCCGGCGTGGGCCACGCCCGCGGC
CGCGGCGGCGGGGGCGGGGGGGGCGGGGGGGCACCCCGCCGGCGCCCCCCCCCCCGCCGC
AACGGAACTGTATGTCCGCCCGTCCCGTGTACGGGCGGACCCCGCGACGAATTTTCGGGG
TTCCGCGGCTGTGCGCCGCACCCCCGCGCGTGGTGCCACGCCTTCGCTGTCCGAGGCACC
AGACGTGCACGTCTGGGGCCGCGAACGCGCAGCCCTCCCCTTGGCCCTCGGAGGAGGTGC
AGAGGGAACCCATATTATCCTCCTAGTACCTGCCATGAAGGCCTACCTAGGAGGGCCCCC
ATGGGCGTGGGATTGAGATTAAGCTCAATCAGCTGAGGCCGTAGCCTTACCAGCGTTGCT
TCCCGGAGATGACGAGTCCCATGGAAATAGACTGTTGGTAGCGTCGATCTCACTTTCCAA
AACTCTACTAGTTGTCCTGTGTCGTCCAGGAGCAGATAGCACGCTGCTCATGGTTTGAAG
CCCTTAAAAGGTGTCTAGTCCAGCATGTGGACTGTCAACCACTGCTACTACGAAGCCAAT
GCCAAATGTTCGGGCCGGCACAGGCCGGTGGACACCCGGAACCCCATAATACTAATTATC
GCAGGTCTATTGGCGGGATCTGCTCGATTTCTTACATACACGAATAAGCAATATTTCCTA
TATCTAGATATCTCGTCCATACTAGGGCTTGGTTAGCCCAGCTCAAGCACTCTTGGATCA
CCACTTCCCATGAGACTGAAATGAATCCCGCAAAAATCACCACAGTAAAACACTTAGAGG
CTT
>LINE_comp3407_g2_i4
AGATTTCCTGTCTGGTCCAGGAGTAGGTGGGACGCTGCTCACGCGGCAAGACATTCGAAA
GGTCTTCAGCCAGGTATCCGGACTTTCAACCACTGCTACTACGAAGCCAATGCCAAATGT
TCGGGCCGGCACAGGCCGGTGGACACCCGGAACCCCATAATACTAATTATCGCAGGTCTA
TTGGCGGGATCTGCTCGATTTCTTACATACACGAATAAGCAATATTTCCTATATCTAGAT
ATCTCGTCCATACTAGGGCTTGGTTAGCCCAGCTCAAGCACTCTTGGATCACCACTTCCC
ATGAGACTGAAATGAATCCCGCAAAAATCACCACAGTAAAACACTTAGAGGCTT
>LINE_comp3407_g2_i5
TCAAGGAAAATGTTTCAAAAACTGTACCGACCTCTATATACCAAAGTTCCACGAATCTAC
AAAAATCTGCATCCATAAACGAAACATTTCAGCAGTACAACAATAACGAATTTTACCGAA
AGTTCTCTCGAAGATTCTCAACGATTCTCGATGCACGATAGAAACGTCTAAACGACCAGT
TCACAGACAATCGAAAGCGACCGTTGACCATCGTCACAGCGACGCAGGAAAAGGGACAGA
GGGAACCCTGATTATTCTCCAAGTACCTGCCGCGAAGGCTTACCAAGGAGAGCCCCCATG
GGCGAGGGATTGAGATTAAGCTCAATCAGCTGAGGCCGTAGCCTTACCAGCGTTGCTTCC
CGGAGATGACGAGTCCCATGGAAATAGACTGTTGGTAGCGTCGATCTCACTTTCCAAAAC
TCTACTAGTTGTCCTGTGTCGTCCAGGAGCAGATAGCACGCTGCTCATGGTTTGAAGCCC
TTAAAAGGTGTCTAGTCCAGCATGTGGACTGTCAACCACTGCTACTACGAAGCCAATGCC
AAATGTTCGGGCCGGCACAGGCCGGTGGACACCCGGAACCCCATAATACTAATTATCGCA
GGTCTATTGGCGGGATCTGCTCGATTTCTTACATACACGAATAAGCAATATTTCCTATAT
CTAGATATCTCGTCCATACTAGGGCTTGGTTAGCCCAGCTCAAGCACTCTTGGATCACCA
CTTCCCATGAGACTGAAATGAATCCCGCAAAAATCACCACAGTAAAACACTTAGAGGCTT
>LINE_comp3446_g1_i1
CTATCACTCTCTCTCACATACCTCTTCACATTCATCCACGCACTTTCCGTCGATCGGCCC
CCGCGAAATCCGTGCTGGGCCTCATTCATACTTTCATTCACTCTAGCTTCCATTCTCGCA
ACCATCATTCGTTCCAGCGTCTTTCCCAACACGGACAGCAGACTGATTGGTCTATAAGAC
GCGGGGTCCGTCCGCGGTTTATCAGGGGACTTCGGGAGCACTATCACACACGCCTTCTTC
CATTCATCCGGAAAACATCCACAACTCAAGCATTCATTGTACATTCGCAACAACCATCCC
GGGATCGCATTCCAAATCATTCTCATCATTTCCGCATTTATTCCATCCAGACCGGGTGCC
TTGTTCAATTTAGCCTTTCGTACCGCTGCATTCACTTCATTCCATTCGAACATTCTCACC
GGTCCAATCTCATTCACACCATCTACCACAGTCTCGCTTTCCATTCTCGCTACTGGGAAG
AACCACTCCATCAAGATGCTCGCACATTCACTCCACGTGGAATACGATATTCCATTTACA
TTCAACGCACTCATACTTTGCCTCTCATTCCTTCCACGACACACTCTATACACA
>LINE_comp3446_g2_i1
CATCCACTCTTCACGCATTCATTATACACATGCACCATTCATCCAGGAATCGCTCTCCAT
ATCGCTCTCAGCATTTCTCCGTTTATTCCATCCTGACCGAGTGCTTTACGCAATCTCGCT
TTCCTAACAGCCTCATTCACTTCGTCCTATTCAAAACACCTCGCTGACTCGTTCAGTCTC
TCTTCTTGTACATTCGTTCTATTATCAGGTATACTCGTCGCTGGGAAGAACCATTCCATC
TCGCATATTCATTCCACGTAGAGTACGTCACATCGTTCACTCTCAGCGCACTCATACCTT
GCCTCACATACTTCCCACGGCACACTTTATATATTGGGCCCCATGGATCCAGATTAGACG
ACACACTGGAAAACTGTCGCCAGTTTTCCTCTTTCACTCTTCTCATTCGGAATTTATATT
CACTCAGCATTCTTTTATACTCTCTTTTTCTCATCTCCACATTCTCTCCTTCTCTCTTTC
TCTCTCCTTCCCAAGCACGTTTACTCTTTCGCACTTTACCCTTGAGGGCACTCAATTCGT
TCGTCCACCACACAGTCCTTCTATCGCTCTTACGTACACTCTCTCTCATGTATTTCTCAT
TCACTCCTTGGATCCAGCCCATCAGTATATCATCCATTCTCTCAACATTCGTCTCATTCA
TCAATTGCACTCCATTCTGTTCCGCCACGCATGCCAACTCATCTACATAATCTTCCCAGC
GAACATCCTTGCATACCCACTTTCTATATAAGTTAACATTTTCTCTCTCAATCGCACCAT
ACAACATCCGTATAAGGACCACATTGTGGTCACTTATACCCCAATCATACTTTACATCCC
ATTCAAATCGGCACCCGGCCGGCATTCCATTCATCAAAGTCACATCAATATCGCTCACAC
CATTCACGCCCGAGAAA
>LINE_comp3446_g3_i1
GAACGGACCACAGATGGACCCCTGCGGACAGCCCCTTTCAACATCCTTCCATACTACATC
ATTTTCACTCACCATGCATACTTTGCGGTTTCGGAAGTAGCTCCTCCATAGAGCTACTTC
CTCGCACCCAAGTTCATTCAATCTATCAAGCACACACATCCATTCCAAACAGTCAAAAGC
GCTCTTAAAATCGACAAACACACCAAGTATATACTTACTATCACTCTCTCTCACATACCT
CTTCACATTCATCCACGCACTTTCCGTCGATCGGCCCCCGCGAAATCCGTGCTGGGCTTC
ATTCATTCTTGCATTCACTCTTCCTCCCACACGTGCTATCATCATTCTCTCTAAAGTTTT
CCCCAACACGGACAGCAAGTTAATCGGCCTATATGACGCGGGGTCCGATCGCGGTTTTTC
AGGAGATTTCGGAATAACAACCACTCGCGCTTCCTTACATACCTTCGGAAAA
>LINE_comp3446_g3_i2
CTTAAAATCCACAAACACACCAAGTACATACTTGCTATCACTCTCTCTCACATACCTCTT
CACATTCATCCACGCACTTTCCGTCGATCGGCCCCCGCGAAATCCGTGCTGGGCTTCATT
CATTCTCACATTCACTCTTCCTTCCACACGCGCTATCATCAGTCTCTCTAAGGTTTTCCC
CAACACGGACAGCAAGCTGATCGGCCTATACGACGCGGGGTCCGACCGCGGTTTTTCGGG
AGACTTCGGAATGACAACCACTCGCGCTTCCTTC
>LINE_comp3462_g1_i1
GCGAATGAATTTTAGAGTGCATCTGGAGAATGTAAGGGCTAAGATTATGAATGTTGTTGG
GCAAATGAGGCGTGTGTTACGGTGTGAATGGGGTATGCGTCGGAATGCAGTGCGTGTTTT
GTATAAAGGTATGTTTGAAGCGTGCGTGTTGTATGGTGCGAGTGTATGGTACGGTGTGTT
GCGGTATGATTATGGGCGAAAGTTGTTGGAGCGATGTCAGCGTGTGGTTTTGTATGCATG
TGTGCGTGTGTGTAGGACCGTTTCGACGGAGGCAATGCAGGTCCTGATGGGAGCAATCCC
ATGGGACCTGCAGTGCCGGCGGCGAGTGATTGTATGGAAATGGAAGCGTGGATTGAGTGT
GGGTATGAATGAGTGCGTGAATGACGAAGAGTTGAATGGGAAGACATCGGCTGAATGTGT
GAAAATTTTGGATGAAAGGTTATATGATGAATGGCAGAGAAGATGGGATGCGAGCATGAA
TGGACGGGTGACGTATGAA
>LINE_comp3462_g1_i2
GCGAATGAATTTTAGAGTGCATCTGGAGAATGTAAGGGCTAAGATTATGAATGTTGTTGG
GCAAATGAGGCGTGTGTTACGGTGTGAATGGGGTATGCGTCGGAATGCAGTGCGTGTTTT
GTATAAAGGTATGTTTGAAGCGTGCGTGTTGTATGGTGCGAGTGTATGGTACGGTGTGTT
GCGGTATGATTATGGGCGAAAGTTGTTGGAGCGATGTCAGCGTGTGGTTTTGTATGCATG
TGTGCGTGTGTGTAGGACCGTTTCGACGGAGGCAATGCAGGTCCTGATGGGAGCAATCCC
ATGGGACCTGCAGAGCCGGAAACGGGCGATTCTGTGGCGTCTAAAAAATGGGTTGAGTGT
TGGTATGAATGAGTGTGTGACTGATGACGAAATGAATGGTAAGACATCGGCAGAATGTGT
GAGAATCGTGGATGAAAGGTTATATGATGAATGGCAGAGAAGATGGGATGAGAGCATGAA
TGGACGGGTTACATATGAGTTTATCAGGAGTGTGAGATTTGCGTGTGAGAATAGAATGTT
TGACCCAAGTATGAATGTGTGTTTTGTTCTTACCGGACACGGTAGTATGAATGCGTATTT
ATTTGAGCGTGGTTTGTGTGATAGTCCTTTGTGTGCGTGTGGAAGAGCGAATGAAGATTG
GAAGCATGT
>LINE_comp3462_g2_i1
ACCGAGAGTGCGTGGCTGAAAGTCAAAGAGTACGTGGAAATGAGTGAGTGTAAGTATGTG
CTGGGTGTGTTTGTTGACTTTCAGGGAGCGTTTGACAATTTAGAGTGGAAGCGTGTGATT
GAGAGGTTGAATGTGGTTGGATGTAATGATATTGGGTTATGGATGGATTATTTTAAGGAT
CGCATGGTGTGTATGGAAGGTGTGAATGGGATTGTATGGAAAAAAGTTGAACGTGGGTGT
CCACAGGGGTCCATCTGTGGACCATTTATATGGAATATAATGATGGACGAACTCCTGTGG
ACACTGAGTGAATGTGGATGTAAGTGTGTTGCATATGCGGATGATTTGTTGTTGATTGTG
GAAGGGCGTAATCGAATGGAGCTTGAGCGAATGGGAACCGAGTGGATGAGACATGTGAGT
GAATGGGGAGCGAGAGTTGGTGTGAGTGTGTCTGAAAGTAAAACGGTGTGTATGCTGATG
AAAGGGATCCTGGCCAGATCTAGATGCCCGAACGTACGTGTGAATGAGAGATGCGTGAAG
TATGTTGAATGCGTGAAGTACCTTGGTGTGTGGATGAGTGAGAGAATGAATTTTAGGATG
CATCTGGTGAATGTGAGGTCTAAAATTATGAATGTTGTGGGGCAAATGAGAAGAGTGTTA
CGGAGTGAATGGGGTGTGAGAAAGAGAGCTATGCGTGTGTTGTACAAGGGACTGTTTGAA
GCATGTGTGTTGTATGGATCGAGTGTATGGTGTGATGTTTTGCGTTTCGAGTATGGGAGG
AAGTTATTAGAGCGGTGTCAGCGTGTCGTGTTGTATGTGTGCGTGCGTGTGTGTAGGACC
GTCTCGACGGAGGCCATGCAGGTCCTCATGGGAGCGATCCCGTGGGACCTGCAGTGCAGA
CGGCGAGCGATTGTGTGGAAATTGAAGAATGGTGTGAGCGTGGGTACGAATGAGTGTGTG
AGTGATAATGAAT
>LINE_comp3462_g2_i4
TGAATGGGGAATGAAAGTGGGTGTAAGTGTTTCGGAGAGCAAGAGTGTGTGCATGTTGAT
GAAAGGATGTTTGGCCAAAAGCAGATGCCCGAACGTACGTGTGAATGGAAAGTGTATGAA
GTATGTTGCGTGTGTTAAATATCTTGGTGTGTGGATGAGCGAGCGAATGAATTTTAGGGT
GCATCTGCAGAATGTAAGGGGCAAGATCATGAATGTGGTAGGA
>LINE_comp3462_g2_i5
ACCGAGAGTGCGTGGCTGAAAGTCAAAGAGTACGTGGAAATGAGTGAGTGTAAGTATGTG
CTGGGTGTGTTTGTTGACTTTCAGGGAGCGTTTGACAATTTAGAGTGGAAGCGTGTGATT
GAGAGGTTGAATGTGGTTGGATGTAATGATATTGGGTTATGGATGGATTATTTTAAGGAT
CGCATGGTGTGTATGGAAGGAGCGAATGGTATTGTATGGAAAAAGGTTGAGCGTGGGTGT
CCACAGGGGTCCATCTGTGGACACTGAGTGAATGTGGGAGCAAATGTGTAGCGTATGCGG
ATGACCTGTTGCTGATTGTGGAAGGGCGTAATCGGATGGATCTGGAGCGAAAGGGAACCG
AATGGATGAGGATCGTGAGTGAATGGGGAGCGAAAGTAGGTGTGAGTGTGTCTGATAGTA
AAACGGTGTGTATGTTGATGAAAGGTTCTTTGGCTAAAAGTAGGTGCCCAAATGTACGTG
TGAATGAGAAGTGTGTGAGATATGTTGAATGTGTGAGGTACCTCGGCGTGTGGATGAGAG
AGCGAATGAATTATCGAGTGCATCTGGAGAATGTGAGGATTAAGATTATGAATGTGGTTG
GACAAATGAAGCGTGTGTTACGGCGTGAATGGGGTATGCGTGGAAGTGCGGTGCGAATGT
TGT
>LINE_comp3462_g3_i1
CTCTTCCGATCTATGAGAATTGTGAGTGAATGGGAAGCAAAAGTGGGAGTGAGTGTTTCT
GAGAGTAAAAGTGTGTGTATGCTGTTGAAAGGGAACTTGGCCAAGACCAGATGTCCAAAC
GTGCGTGTGAATGATAAATGTTTAAAGTATGCTGAGTGTGTGAAATATCTGGATGTGTGG
ATGAGTGAACGAATGAATTATAGAGTGCATCTGAAGAATGTTAGAGTGAAAGTGACGAAT
GTGGTAGGACAGTTGATTCGTGTCCTACGGAGTGAAT
>LINE_comp3462_g2_i6
GCTGAAAGTCCGAGAATATGTGGAATCGAGTGAATGTAAGTATGTATTAGGAATGTTTGT
GGACTTTCAGGGAGCGTTTGATAATTTAGAATGGAAGAGAGTGATCGAGAGGTTGAATGT
TTTAGGATGCGTGGAAATTGGGTTATGGATGAGCTACTTTAAGGATCGTATGGTGTGTAT
GAGCGGTGTGAATGAGACTGTGTGGAAAAGGGTTGAGCGTGGGTGCCCACAGGGGTCCAT
ATGTGGTCCATTTATATGGAACCTCATGATGGATGAGCTCCTGTGGGCACTGGATGAATG
TGGGTGTAAGTGTGTTGCGTACGCGGATGATTTGTTGATTGTTGTGGAAGGCCGTAACCG
AGTGGAGCTGGAACGAAAGGGAACTGAATGGATGAGAATTGTGAGTGAATGGGGAGCGAA
AGTGGGAGTGAGTGTGTCAGAGGATAAGAGTGTATGTATGTTATTGAAAGGATGCTTGTC
GAAAACCAGATGCCCGAACGTGCGCGTGAATGGCAACGGAATGAAATATGTTGAATGTGT
GAGATACTTGGGAGTGTGGATGAGTGAGCGAATGAATTTTAAGGTGCATTTGGTGAATGT
GAGAGTGAAAGTTGCGAATGTTGTGGGTCAGATGATGCGTGTGTTAAGGAGTGAATGGGG
TATGAAACGAAAAGCAGTGCGT
>LINE_comp3462_g2_i7
GCTGAAAGTCCGAGAATATGTGGAATCGAGTGAATGTAAGTATGTATTAGGAATGTTTGT
GGACTTTCAGGGAGCGTTTGATAATTTAGAATGGAAGAGAGTGATCGAGAGGTTGAATGT
TTTAGGATGCGTGGAAATTGGGTTATGGATGAGCTACTTTAAGGATCGTATGGTGTGTAT
GAGCGGTGTGAATGAGACTGTGTGGAAAAGGGTTGAGCGTGGGTGCCCACAGGGGTCCAT
ATGTGGTCCATTTATATGGAACCTCATGATGGATGAGCTCCTGTGGGCACTGGATGAATG
TGGGTGTAAGTGTGTTGCGTACGCGGATGATTTGTTGATTGTTGTGGAAGGCCGTAACCG
AGTGGAGCTGGAACGAAAGGGAACTGAATGGATGAGAATTGTGAGTGAATGGGGAGCGAG
AGTTGGTGTGAGTGTTTCGGAAAGTAAGAGTGTGTGCATGTTGTTAAAGGGATGCTTGGC
GAAGTCAAGGTGCCCAAACGTACGCGTGAATGGCAAATGTATGAGGTATGTTGCGAATGT
GAAGTATCTGGGAGTGTGGGTGAGTGAGCGCATGAATTTTAGAGTGCATCTAGTGAATGT
GAGAGTGAAAGTTATGAATGTTGTGGGACAAATGTTGCGTGTACTTAGGAGTGAATGGGG
TGTGAAAAGGAAAGCGATGCGTGTGTTATACAAAGGGTTGTTTGAGGCGTGTGTGTTACA
TGGTGCGAGTGTGTGGAGTGGTGTGCTGTGTTTTGAGTATGGGAGAAAGTTATCAGAGAG
ATGTCAGCGTGCTGTGTTGTATGGATGTGTGAGTGTATGCAGAACCGTCTCGACGGAGGC
AATGCAGGTCCTCATGGGAGCAATCCTATGGGACCTGCAGTGCCGCAAGCGAGCCATAGT
GTGGAAGTTTAAGCATGGAGTGAGTGTAGGTGCGAATGAGTGTGTGAGTGATGAAGAATT
GTTTGGGAAAACGTCGGATGAGTGTAAGGCATTGTTGGATGAGAGATTGTATGGTGAGTG
GCAGAGAAGATGGGATGCGAATGTAAATGGACGGGTCACGTATGAGTATATTAGGGATGT
TAGGTTTGCGTGTGAGGATAGAGAGTATGTGTTTGACCCGGGGATGTATGTATGTTTTAT
GTTGACTGGGCATGGAAGTTTGAATGCGCATCTGTATGAACGAGGATTGAGTGAAAGTGC
TTTGTGTGCATGTGGGAAAGCAAATGAGGATTGGGTGCATGTTCTGTGTGTGTGTGAATT
GTACGAGGACCTCCGCAGCCTCAATGATTGTGGTGTGATTGTGCGTGAGAATGGGAGTGT
GGATGTGAGTAGTGTGCTTGGTAGTGAGGCTACGTACAAATGTTTTTGTATGACTGTCAA
TAGTATGTTTGAGAGAAGAAGGATGAATGTTAACCGTGTGAATGTCTGATGTGTTTGTCC
TTTTAGGTGTCCCGTTAGGGGTCG
>LINE_comp3462_g2_i8
TGGATGAGTTATTTTAAGGATCGTATGGTGTGTATGAGCGGTGTGAATGAGACTGTGTGG
AAAAGGGTTGAGCGTGGGTGCCCACAGGGGTCCATATGTGGTCCATTTATATGGAACCTC
ATGATGGATGAGCTCCTGTGGGCACTGGATGAATGTGGGTGTAAGTGTGTTGCGTATGCG
GATGATTTGTTGTTGATTGTGGAAGGGCGTAATCGAATGGAGCTTGAGCGAATGGGAACC
GAGTGGATGAGACA
>LINE_comp3462_g2_i9
AATGGGTTTTTTGAAGCGTGTGTGCTGTATGGAGCGAGAGATATGTCAGCGTGCTGTGTT
GTATGGATGTGTGAGTGTATGCAGAACCGTCTCGACGGAGGCAATGCAGGTCCTCATGGG
AGCAATCCTATGGGACCTGCAGTGCCGCAAGCGAGCCATAGTGTGGAAGTTTAAGCATGG
AGTGAGTGTAGGTGCGAATGAGTGTGTGAGTGATGAAGAATTGTTTGGGAAAACGTCGGA
TGAGTGTAAGGCATTGTTGGATGAGAGATTGTATGGTGAGTGGCAGAGAAGATGGGATGC
GAATGTAAATGGACGGGTCACGTATGAGTATATTAGGGATGTTAGGTTTGCGTGTGAGGA
TAGAGAGTATGTGTTTGACCCGGGGATGTATGTATGTTTTATGTTGACTGGGCATGGAAG
TTTGAATGCGCATCTGTATGAACGAGGATTGAGTGAAAGTGCTTTGTGTGCATGTGGGAA
AGCAAATGAGGATTGGGTGCATGTTCTGTGTGTGTGTGAATTGTACGAGGACCTCCGCAG
CCTCAATGATTGTGGTGTGATTGTGCGTGAGAATGGGAGTGTAGATGTGAGTGGTGTGCT
AGCTAATAAGGCTGTGTATGAATGTTTTTGTACGACTGTGAACCGAATGTTTGAGAGGAG
AAAAATGAATGGGAATCGGGTGAATGCTTAATGTTTAGTTTATAGGTGTCCCGTTAGGGG
ACGCAGCTGGAACCCCGACAGGGAAAAAGGCTGCGGTGTCAGGCTTTTGCCGGGTACCGT
CGTCAGCCGATCCTTGTCGAATCCATTGGAGAGTAGGGTCT
>LINE_comp3463_g1_i1
GCTCGGTAGTTCTAGTGTTAAAAACAGAGTAAACTTATCTTACAACGTCGCCGCAGCGGT
AACAACGGAGTGCAAAGGATTAACCCATTAAGTCCCATGAAATTTTTCTTCGAATTTTTA
GATGAAATTTCGTATCTCGAGTAATGAGTGTCCGTACTATCTTGGAGAAATAGTGAAAAA
AATCTGACAAGTTCAATATACTATTTTATTTTGTAATTCCAAGTTA
>LINE_comp3464_g3_i1
CGCAGGCAGCTCGCAGAATCATGCCCCGTGTTGATGGGATTAGTATTTAAGACGAATGTT
CAGTCTTATACGGAACATCGTAATTAGAGATTCTCGAAGTTTGGTTTATGTCATGAACGG
GACAGACAGTTTATTTTAGTGTTTATCCTTCGTCAATATTTTAGAGTTTTATTTTCTACA
ACCGGCATTTATCCTTCGCGATAGTAAGGTTTATTTTAGTCATTTGGAATTTTATACAAT
GGCTTTAGAATTTCATTTCGTTCATCTTAATAACCGAACAGGTCATAAACTCGGGTTTTT
CGTAGGGTCGATCAAAAGATGTGCATAACGGCCTTTCTACGCTCTCTTACAACGATTATA
AGGACTTTTTAAGAGAGCGTAGTTTCGCGAGTTGGGAGGAGCAGGACAGAAGGGATTAGC
GTGGAACAGAGCAGTTTGAAGATGACATCGAAGGATCAAAAATCGATGTCGCTATAAACG
CTTAGCCGCCACAAACCAGATATCCCTGTGGTAACTTTTCTAACACCGCTTGCTGAAAAC
TCTTCAAGCCAA
>LINE_comp3476_g1_i1
TCCCGAGCACTAGAATACCGTAACACGATCAGTCTCGACCTGACCGTGGCGGTGTCAACA
TCGTGGAGTGAACGCTCCCGTGTGAATCTACCATGACAACGGACGCGAGGCAAAATAACG
TGGACCCCAACAGCCCCCGCGGGTCCATGGCAGGGAGACCTGCATCGGCAGGGGGGCTAT
CTTATAATGGACCAGGCAGGACAATGGAAAACGAGATGGATCACGAAATGGACAATGTCC
AAGTGTCCACTAATAACGAAGATACTGTCCATACTGACCGACCAAGGACGGCAAGGACCA
TAGAGAAAGACATAGAAGCAGCTGAGGATGCAGAATCTAAAAGAAAACGAAAGTGCCAAG
TGAAATCGAAAGTTGGCACGTCAGTGAAAAATGTTTCGGACCGTGGAGTGGACACTGAAC
GAGTTGGCGAGAAAAACTTGTACGTGGCAGAAAGTGGACATTGTGACGTATCAGCCACCA
ATAGCACAACATCGTACCTCGAAGGACAACGACAGGGCAACCGTTTTTCCGAAACATGCG
AGTGCCAAGTCGAAATGAAAGTTGGCCGAGCAACCGAAAACGCTTCAGGCGTTGAAAATA
ACACCCCCTGGACTACCTTAGACGTTCCTAGCGACACCGAGAGAGGGCGCGAGGGTGTAT
CAACCGAAAAACGAACCAGTTCAAATACTGGAAGACTGAGAAGAATTTTTACAAGTCTTA
AAGTTTTCGAATACCAACGAAATTCAGAAGTTTGCACCTCAACGGATAACGTTTCGGGCA
ATGGAAGGGACACACCCAGGGCTACCCAAAGAGTCCCCAGCGACACCCATAGAGGGCGTG
GGAGGCTGTCAACGATCGAAAGGACCGGCACAAATTCCGCAAGGTTGCGAGTAGAAAATA
CCATGTTAGAAGTGTACAGGCACCAACCAAATTCCGAAATTGGCGTGTCGGTGGAAAATG
AAGCTGGACATAACATAGGACTAATCCAAACCACCGAAACAATAAGAAGAGAATAAGAAA
AGAACAAGAAGAAGAAATAGAAGAGGAAACAACAGAAGAAGAAAATAAGATCGTAATCAA
GGTACCGATGGAGGAAGTGCAATACTGCAGATTCCAAAGATGCCAGCAAAGGAACGTGGA
TTTCCTCAACCTTACGGACCTGAACAGACATTATAAAGGCCAACATAGCAGTAATGACAT
TGCGTGGCAATGTAGAAAATGCGGCAAGGAGTTCCCCGGTCTACACAATTGTAGATGCCA
TATCCCAAAATGCAGACAGCAAGTGGAGACACAAGAATTACCACACATATGTGAAAAATG
TTCGCAACAATTCCACACTGCCAGAGGATTAGCAACACACGAGAGGCACAGACACCCAGA
GATGCGGAACAGAAAAAGGCAAGAAGAAAACGATCGCCAAAAAGGGAGACCGGGTAGAAG
AAATTATGTATGGACGGAAAAAGAAATAGAAGAGCTAATAGCACTCAACCAGGAATTCGC
AGGAGAAAAAAGACCTAACGTGGAGATAAGGAAGAGAATGCCAAGTAAAACAGTGAAACA
AATTAGTGACAACAGAAGAGAATTAAATAATCAGGCCAGAGGAGTACAGCAGGAGAGTGT
CATAGAAGAAGAAGGACAGATAGCTACGAATGAAAATGTAGAAGAAGAATCCCGGGAACA
AGAAGAGGAACACCAACAGCAAAACTCAACAACTCTCCTTCTAAACCTTGAAATAGAAGA
TTTAGACGATATAGTGGACCAAACGTGGCGAGAACAAATATCGAGGGCCATTAAAAGAGT
GTCCCTGCGCAGGAAGGATGAATTGCACGAAATAACAAAAGAACTGGACGAGATATTCAA
CAAGATAGAAGAAGGTGAAGATGCACCATCACTAATAGACCAGTGGATCAATAATTCGTT
CAACCCTATCATATTGGGAGAAGAAAAGAACGAAGAGATAGAAAAAAGGCAAGACCCAAA
GAAAATAGGAAAGAAAGCAGGTCGGATAAACACAAAAAAGAACAACCACAACCGAAGAGC
GAAATTTAGATTCGCCAGATGCCAAGGGCTATACGAGAAGTGCCCTAAAAAACTAATAGA
TATGGCGATAAGCGGTGATTTCTCCGTGCTAGACAAAAAGAAGGAACTCCCGGCAGAAGT
GGAAATTAAGACACTTTACGAACAAGTGTGGGGACAAAAGGGACCAAAAGTAACCAGCAA
AAAAGAGCATCCTGAAGCCACTTCCTTACTCTCAGCCTGCCCACCATATACAGAAGAGGA
AATCCTAAAAAGAATTAGGAAAATTAAAAACAACACAGCAGGCGGACCAGACAAAATACG
AAAGACTCATCTAAGGAAGAAAAGCATAGGAAAAACGCTGGCAAAACTATTTAACATGCT
AGTGCTCACAGGTCACTACCCAACACCGTGGAAAATGAATAGAACCACACTACTGCCAAA
ACCTAACAAAGACCCAAAGGATGCAAGGAATTGGAGGCCTACAACTATAGGCTCCCTTGT
GGCAAGGATCTTCTCAGGAACCTTAGATCAAAGAATGAGAAGAATCACAACCCTATCAGA
GAGGCAAAAGGGATTTATACAAGAAGATGGATGTAAGAATAACATAAGGATGGTGGAAAC
GATAGCTTCGAGGATGAAAGTAGAAAAAGGAGGAATCATAAGTGTAATAGACATATCCAA
GGCTTTTGACACCATACCGCACTCAGCGCTGGAACCCAGGCTTAGAGAAAAGGGTATACC
TGCACATATTATACAATTAATAAACAACGTGTACACTGATTGCAGAACAGTAATCAAAAC
GAAAAGCAACCAGGGAATTGAAATAGAGATCCAACGTGGAGTTAAACAAGGAGACCCTCT
ATCACCCCTACTCTTTAATATAATGATGGACGAAATAATCGAAGACAAAAGCAGAAACAC
TAAGAGGATCGAAATAAATGGCAAAGGAATAGCAGTTCTAGCGTTTGCAGATGACCTAAT
CATCATAGGAAGGGACAGAGAAGACGCACAGGAACAGCTACAGATACTGGACCAGAAACT
AACAGAACTGGGTATGGAACTGGCAACTGATAAATGCCTCACCTTTGAAATCGTAGGAAA
GAAGAAAACGTGGTACGCCAAGAACCCGGAGCTGAAAATAAAAAATAAGGAACTACCATA
CGCCAGTCCAGAACATGCGATCAGATACTTAGGAGTGGACATAACTCCATGGAACAACGT
CCACTGCGAGGGGACCACGCAGAAGATACTACAATCAATAAGAAATATCGCCAAGATGAA
ACTGAAACCGCACCAAAAGATGGACCTTATTCAAAGGTTTCTACTGCCCCACTTTCTGCA
CAAACTAATTGCATCGGCTCCACAGAGTACAATACTTAAGGGATTAGACCACAACATAAA
GCAGGAAGTAAAGAAGATCTTACACCTAACACCCTCCACAACAGACGGCCTAATTTACAC
AACGAAGTTACACGGAGGCCTCGGACTTCCCAGATTAGAACATCTGGTTAAACTGGCTGT
CATCAAACACGCGTTAAAAGCAGAAGAGTACAACGACGCAGCTCTGAAAGAAGCAATACT
GGAAGAGAATGTACAGAAGAAATTAAAAGGATATGCAAACTCCCTAAGAATAAATTGGCC
CACCTCCTTACAAGAACTACAGGTCGCGAAAAAGAGGCTAAGAAGAGAAAATACGGACAG
ATGGCAGCAACTAATATCACAAGGACAAGGAGTAGAATACTTCAGAGAAGACAAGATAGG
AAATTCATGGCTTGCAAACCCAAACTTACTAAAGCCATCAAGATACATAGATGCACTGAA
ACTAAGGACCAATACTTTCGGGAACAGAACAACGTTACATAGAGCGAAATTGAATGAAGA
TGTTGGAAACGCTAGGACATATCATTGGAGGGTGCATCAGCGTTAAACCGATGAGGATTA
GAAGACATGATGAAATAAAGGACTTGATCACGAAAATAGCAGGGCGATCATGTGCAGTAT
TCCCAGAACCGACAGTGCGAGTCGGCGGCAACCTCCTAAAGCCGGACCTGATAATCAAAG
ACCAGGAAAAGCTAATCGTAGTCGACGTTACGGTCCGCTACGAGGTGGGAGGAAGCTTAA
GACGAGCATATACGGAAAAGGTGGAAAAATACAAAGAAGCAGCACAAAGCATAAAGGAAA
GACTGGGATGCAACACTGCGGAAGTCCTACCGATTGTAGTAGGGGCAAGAGGAGCCATGC
CGACTAAAACGGTGAAGAATCTAAAAATATTAAAATTTCAGGAAAAAGACTTGATGACGG
TCTCAATGATAGCATTGAGGTCGTCAATCGAGATAGCAAATTCCTTCATTGACTACGACA
ATATCATCTAAATTTACATTAGAAGATAGCAAAGAAGCGTAGATAATACGCTATAACCGC
AAAATACCGAGAAGGTAATATACTAGAACATATCAAAGTAGATCCAAAGAAATAAAATTA
AACCCAATGAAGGCACTGCTTAGTAAGCCCATGTGTAAACACGGTGCGAGTCGTATGACG
TTTTCCGAGCAGGAAAACTGTCACGGCGGCAGAGCCGAGCGGGAGAAGACGCCGCTCGGG
GCAGATGCCTCCACGTGGCTTTCCCCGGTAACACGCTTCCGGAAGCATGGCCAAATTTCG
CCTTCCTTTAGAGAGGACTCTGTTAAGACTAATTATTCCGAATCCGTTTCTAGGTGGTTT
CGCTAGAAGGACATAGATACCCCACACTACCCTCAAAATTTTTTTTCCTTTTTGATATAA
TATTGTTATAGTTGTTATTTATTCTAAAGTTGTTAAGTTTGAAACCCAACAGGGGGGGGG
GGGCAATACCCCGGAAATCCGCCTTCTTGTAATTTACAAGAAGGCGCAGAGTTTAGCCAA
ATGCCTCGTCATCTAAT
>LINE_comp3476_g1_i2
CACGACGCTCTTCCGATCTAAAGGCAAGACCCAAAGAAAATAGGAAAGAAAGCAGGTCGG
ATAAACACAAAAAAGAACAACCACAACCGAAGAGCGAAATTTAGATTCGCCAGATGCCAA
GGGCTATACGAGAAGTGCCCTAAAAAACTAATAGATATGGCGATAAGCGGTGATTTCTCC
GTGCTAGACAAAAAGAAGGAACTCCCGGCAGAAGTGGAAATTAAGACACTTTACGAACAA
GTGTGGGGACAAAAGGGACCAAAAGTAACCAGCAAAAAAGAGCATCCTGAAGCCACTTCC
TTACTCTCAGCCTGCCCACCATATACAGAAGAGGAAATCCTAAAAAGAATTAGGAAAATT
AAAAACAACACAGCAGGCGGACCAGACAAAATACGAAAGACTCATCTAAGGAAGAAAAGC
ATAGGAAAAACGCTGGCAAAACTATTTAACATGCTAGTGCTCACAGGTCACTACCCAACA
CCGTGGAAAATGAATAGAACCACACTACTGCCAAAACCTAACAAAGACCCAAAGGATGCA
AGGAATTGGAGGCCTACAACTATAGGCTCCCTTGTGGCAAGGATCTTCTCAGGAACCTTA
GATCAAAGAATGAGAAGAATCACAACCCTATCAGAGAGGCAAAAGGGATTTATACAAGAA
GATGGATGTAAGAATAACATAAGGATGGTGGAAACGATAGCTTCGAGGATGAAAGTAGAA
AAAGGAGGAATCATAAGTGTAATAGACATATCCAAGGCTTTTGACACCATACCGCACTCA
GCGCTGGAACCCAGGCTTAGAGAAAAGGGTATACCTGCACATATTATACAATTAATAAAC
AACGTGTACACTGATTGCAGAACAGTAATCAAAACGAAAAGCAACCAGGGAATTGAAATA
GAGATCCAACGTGGAGTTAAACAAGGAGACCCTCTATCACCCCTACTCTTTAATATAATG
ATGGACGAAATAATCGAAGACAAAAGCAGAAACACTAAGAGGATCGAAATAAATGGCAAA
GGAATAGCAGTTCTAGCGTTTGCAGATGACCTAATCATCATAGGAAGGGACAGAGAAGAC
GCACAGGAACAGCTACAGATACTGGACCAGAAACTAACAGAACTGGGTATGGAACTGGCA
ACTGATAAATGCCTCACCTTTGAAATCGTAGGAAAGAAGAAAACGTGGTACGCCAAGAAC
CCGGAGCTGAAAATAAAAAATAAGGAACTACCATACGCCAGTCCAGAACATGCGATCAGA
TACTTAGGAGTGGACATAACTCCATGGAACAACGTCCACTGCGAGGGGACCACGCAGAAG
ATACTACAATCAATAAGAAATATCGCCAAGATGAAACTGAAACCGCACCAAAAGATGGAC
CTTATTCAAAGGTTTCTACTGCCCCACTTTCTGCACAAACTAATTGCATCGGCTCCACAG
AGTACAATACTTAAGGGATTAGACCACAACATAAAGCAGGAAGTAAAGAAGATCTTACAC
CTAACACCCTCCACAACAGACGGCCTAATTTACACAACGAAGTTACACGGAGGCCTCGGA
CTTCCCAGATTAGAACATCTGGTTAAACTGGCTGTCATCAAACACGCGTTAAAAGCAGAA
GAGTACAACGACGCAGCTCTGAAAGAAGCAATACTGGAAGAGAATGTACAGAAGAAATTA
AAAGGATATGCAAACTCCCTAAGAATAAATTGGCCCACCTCCTTACAAGAACTACAGGTC
GCGAAAAAGAGGCTAAGAAGAGAAAATACGGACAGATGGCAGCAACTAATATCACAAGGA
CAAGGAGTAGAATACTTCAGAGAAGACAAGATAGGAAATTCATGGCTTGCAAACCCAAAC
TTACTAAAGCCATCAAGATACATAGATGCACTGAAACTAAGGACCAATACTTTCGGGAAC
AGAACAACGTTACATAGAGCGAAATTGAATGAAGATGTTGGAAACGCTAGGACATATCAT
TGGAGGGTGCATCAGCGTTAAACCGATGAGGATTAGAAGACATGATGAAATAAAGGACTT
GATCACGAAAATAGCAGGGCGATCATGTGCAGTATTCCCAGAACCGACAGTGCGAGTCGG
CGGCAACCTCCTAAAGCCGGACCTGATAATCAAAGACCAGGAAAAGCTAATCGTAGTCGA
CGTTACGGTCCGCTACGAGGTGGGAGGAAGCTTAAGACGAGCATATACGGAAAAGGTGGA
AAAATACAAAGAAGCAGCACAAAGCATAAAGGAAAGACTGGGATGCAACACTGCGGAAGT
CCTACCGATTGTAGTAGGGGCAAGAGGAGCCATGCCGACTAAAACGGTGAAGAATCTAAA
AATATTAAAATTTCAGGAAAAAGACTTGATGACGGTCTCAATGATAGCATTGAGGTCGTC
AATCGAGATAGCAAATTCCTTCATTGACTACGACAATATCATCTAAATTTACATTAGAAG
ATAGCAAAGAAGCGTAGATAATACGCTATAACCGCAAAATACCGAGAAGGTAATATACTA
GAACATATCAAAGTAGATCCAAAGAAATAAAATTAAACCCAATGAAGGCACTGCTTAGTA
AGCCCATGTGTAAACACGGTGCGAGTCGTATGACGTTTTCCGAGCAGGAAAACTGTCACG
GCGGCAGAGCCGAGCGGGAGAAGACGCCGCTCGGGGCAGATGCCTCCACGTGGCTTTCCC
CGGTAACACGCTTCCGGAAGCATGGCCAAATTTCGCCTTCCTTTAGAGAGGACTCTGTTA
AGACTAATTATTCCGAATCCGTTTCTAGGTGGTTTCGCTAGAAGGACATAGATACCCCAC
ACTACCCTCAAAATTTTTTTTCCTTTTTGATATAATATTGTTATAGTTGTTATTTATTCT
AAAGTTGTTAAGTTTGAAACCCAACAGGGGGGGGGGGGCAATACCCCGGAAATCCGCCTT
CTTGTAATTTACAAGAAGGCGCAGAGTTTAGCCAAATGCCTCGTCATCTAAT
>LINE_comp3476_g1_i3
GGGAGTAACTATGACTCTCTTAAGTCTCGACCTGACCGTGGCGGTGTCAACATCGTGGAG
TGAACGCTCCCGTGTGAATCTACCATGACAACGGACGCGAGGCAAAATAACGTGGACCCC
AACAGCCCCCGCGGGTCCATGGCAGGGAGACCTGCATCGGCAGGGGGGCTATCTTATAAT
GGACCAGGCAGGACAATGGAAAACGAGATGGATCACGAAATGGACAATGTCCAAGTGTCC
ACTAATAACGAAGATACTGTCCATACTGACCGACCAAGGACGGCAAGGACCATAGAGAAA
GACATAGAAGCAGCTGAGGATGCAGAATCTAAAAGAAAACGAAAGTGCCAAGTGAAATCG
AAAGTTGGCACGTCAGTGAAAAATGTTTCGGACCGTGGAGTGGACACTGAACGAGTTGGC
GAGAAAAACTTGTACGTGGCAGAAAGTGGACATTGTGACGTATCAGCCACCAATAGCACA
ACATCGTACCTCGAAGGACAACGACAGGGCAACCGTTTTTCCGAAACATGCGAGTGCCAA
GTCGAAATGAAAGTTGGCCGAGCAACCGAAAACGCTTCAGGCGTTGAAAATAACACCCCC
TGGACTACCTTAGACGTTCCTAGCGACACCGAGAGAGGGCGCGAGGGTGTATCAACCGAA
AAACGAACCAGTTCAAATACTGGAAGACTGAGAAGAATTTTTACAAGTCTTAAAGTTTTC
GAATACCAACGAAATTCAGAAGTTTGCACCTCAACGGATAACGTTTCGGGCAATGGAAGG
GACACACCCAGGGCTACCCAAAGAGTCCCCAGCGACACCCATAGAGGGCGTGGGAGGCTG
TCAACGATCGAAAGGACCGGCACAAATTCCGCAAGGTTGCGAGTAGAAAATACCATGTTA
GAAGTGTACAGGCACCAACCAAATTCCGAAATTGGCGTGTCGGTGGAAAATGAAGCTGGA
CATAACATAGGACTAATCCAAACCACCGAAACAATAAGAAGAGAATAAGAAAAGAACAAG
AAGAAGAAATAGAAGAGGAAACAACAGAAGAAGAAAATAAGATCGTAATCAAGGTACCGA
TGGAGGAAGTGCAATACTGCAGATTCCAAAGATGCCAGCAAAGGAACGTGGATTTCCTCA
ACCTTACGGACCTGAACAGACATTATAAAGGCCAACATAGCAGTAATGACATTGCGTGGC
AATGTAGAAAATGCGGCAAGGAGTTCCCCGGTCTACACAATTGTAGATGCCATATCCCAA
AATGCAGACAGCAAGTGGAGACACAAGAATTACCACACATATGTGAAAAATGTTCGCAAC
AATTCCACACTGCCAGAGGATTAGCAACACACGAGAGGCACAGACACCCAGAGATGCGGA
ACAGAAAAAGGCAAGAAGAAAACGATCGCCAAAAAGGGAGACCGGGTAGAAGAAATTATG
TATGGACGGAAAAAGAAATAGAAGAGCTAATAGCACTCAACCAGGAATTCGCAGGAGAAA
AAAGACCTAACGTGGAGATAAGGAAGAGAATGCCAAGTAAAACAGTGAAACAAATTAGTG
ACAACAGAAGAGAATTAAATAATCAGGCCAGAGGAGTACAGCAGGAGAGTGTCATAGAAG
AAGAAGGACAGATAGCTACGAATGAAAATGTAGAAGAAGAATCCCGGGAACAAGAAGAGG
AACACCAACAGCAAAACTCAACAACTCTCCTTCTAAACCTTGAAATAGAAGATTTAGACG
ATATAGTGGACCAAACGTGGCGAGAACAAATATCGAGGGCCATTAAAAGAGTGTCCCTGC
GCAGGAAGGATGAATTGCACGAAATAACAAAAGAACTGGACGAGATATTCAACAAGATAG
AAGAAGGTGAAGATGCACCATCACTAATAGACCAGTGGATCAATAATTCGTTCAACCCTA
TCATATTGGGAGAAGAAAAGAACGAAGAGATAGAAAAAAGGCAAGACCCAAAGAAAATAG
GAAAGAAAGCAGGTCGGATAAACACAAAAAAGAACAACCACAACCGAAGAGCGAAATTTA
GATTCGCCAGATGCCAAGGGCTATACGAGAAGTGCCCTAAAAAACTAATAGATATGGCGA
TAAGCGGTGATTTCTCCGTGCTAGACAAAAAGAAGGAACTCCCGGCAGAAGTGGAAATTA
AGACACTTTACGAACAAGTGTGGGGACAAAAGGGACCAAAAGTAACCAGCAAAAAAGAGC
ATCCTGAAGCCACTTCCTTACTCTCAGCCTGCCCACCATATACAGAAGAGGAAATCCTAA
AAAGAATTAGGAAAATTAAAAACAACACAGCAGGCGGACCAGACAAAATACGAAAGACTC
ATCTAAGGAAGAAAAGCATAGGAAAAACGCTGGCAAAACTATTTAACATGCTAGTGCTCA
CAGGTCACTACCCAACACCGTGGAAAATGAATAGAACCACACTACTGCCAAAACCTAACA
AAGACCCAAAGGATGCAAGGAATTGGAGGCCTACAACTATAGGCTCCCTTGTGGCAAGGA
TCTTCTCAGGAACCTTAGATCAAAGAATGAGAAGAATCACAACCCTATCAGAGAGGCAAA
AGGGATTTATACAAGAAGATGGATGTAAGAATAACATAAGGATGGTGGAAACGATAGCTT
CGAGGATGAAAGTAGAAAAAGGAGGAATCATAAGTGTAATAGACATATCCAAGGCTTTTG
ACACCATACCGCACTCAGCGCTGGAACCCAGGCTTAGAGAAAAGGGTATACCTGCACATA
TTATACAATTAATAAACAACGTGTACACTGATTGCAGAACAGTAATCAAAACGAAAAGCA
ACCAGGGAATTGAAATAGAGATCCAACGTGGAGTTAAACAAGGAGACCCTCTATCACCCC
TACTCTTTAATATAATGATGGACGAAATAATCGAAGACAAAAGCAGAAACACTAAGAGGA
TCGAAATAAATGGCAAAGGAATAGCAGTTCTAGCGTTTGCAGATGACCTAATCATCATAG
GAAGGGACAGAGAAGACGCACAGGAACAGCTACAGATACTGGACCAGAAACTAACAGAAC
TGGGTATGGAACTGGCAACTGATAAATGCCTCACCTTTGAAATCGTAGGAAAGAAGAAAA
CGTGGTACGCCAAGAACCCGGAGCTGAAAATAAAAAATAAGGAACTACCATACGCCAGTC
CAGAACATGCGATCAGATACTTAGGAGTGGACATAACTCCATGGAACAACGTCCACTGCG
AGGGGACCACGCAGAAGATACTACAATCAATAAGAAATATCGCCAAGATGAAACTGAAAC
CGCACCAAAAGATGGACCTTATTCAAAGGTTTCTACTGCCCCACTTTCTGCACAAACTAA
TTGCATCGGCTCCACAGAGTACAATACTTAAGGGATTAGACCACAACATAAAGCAGGAAG
TAAAGAAGATCTTACACCTAACACCCTCCACAACAGACGGCCTAATTTACACAACGAAGT
TACACGGAGGCCTCGGACTTCCCAGATTAGAACATCTGGTTAAACTGGCTGTCATCAAAC
ACGCGTTAAAAGCAGAAGAGTACAACGACGCAGCTCTGAAAGAAGCAATACTGGAAGAGA
ATGTACAGAAGAAATTAAAAGGATATGCAAACTCCCTAAGAATAAATTGGCCCACCTCCT
TACAAGAACTACAGGTCGCGAAAAAGAGGCTAAGAAGAGAAAATACGGACAGATGGCAGC
AACTAATATCACAAGGACAAGGAGTAGAATACTTCAGAGAAGACAAGATAGGAAATTCAT
GGCTTGCAAACCCAAACTTACTAAAGCCATCAAGATACATAGATGCACTGAAACTAAGGA
CCAATACTTTCGGGAACAGAACAACGTTACATAGAGCGAAATTGAATGAAGATGTTGGAA
ACGCTAGGACATATCATTGGAGGGTGCATCAGCGTTAAACCGATGAGGATTAGAAGACAT
GATGAAATAAAGGACTTGATCACGAAAATAGCAGGGCGATCATGTGCAGTATTCCCAGAA
CCGACAGTGCGAGTCGGCGGCAACCTCCTAAAGCCGGACCTGATAATCAAAGACCAGGAA
AAGCTAATCGTAGTCGACGTTACGGTCCGCTACGAGGTGGGAGGAAGCTTAAGACGAGCA
TATACGGAAAAGGTGGAAAAATACAAAGAAGCAGCACAAAGCATAAAGGAAAGACTGGGA
TGCAACACTGCGGAAGTCCTACCGATTGTAGTAGGGGCAAGAGGAGCCATGCCGACTAAA
ACGGTGAAGAATCTAAAAATATTAAAATTTCAGGAAAAAGACTTGATGACGGTCTCAATG
ATAGCATTGAGGTCGTCAATCGAGATAGCAAATTCCTTCATTGACTACGACAATATCATC
TAAATTTACATTAGAAGATAGCAAAGAAGCGTAGATAATACGCTATAACCGCAAAATACC
GAGAAGGTAATATACTAGAACATATCAAAGTAGATCCAAAGAAATAAAATTAAACCCAAT
GAAGGCACTGCTTAGTAAGCCCATGTGTAAACACGGTGCGAGTCGTATGACGTTTTCCGA
GCAGGAAAACTGTCACGGCGGCAGAGCCGAGCGGGAGAAGACGCCGCTCGGGGCAGATGC
CTCCACGTGGCTTTCCCCGGTAACACGCTTCCGGAAGCATGGCCAAATTTCGCCTTCCTT
TAGAGAGGACTCTGTTAAGACTAATTATTCCGAATCCGTTTCTAGGTGGTTTCGCTAGAA
GGACATAGATACCCCACACTACCCTCAAAATTTTTTTTCCTTTTTGATATAATATTGTTA
TAGTTGTTATTTATTCTAAAGTTGTTAAGTTTGAAACCCAACAGGGGGGGGGGGGCAATA
CCCCGGAAATCCGCCTTCTTGTAATTTACAAGAAGGCGCAGAGTTTAGCCAAATGCCTCG
TCATCTAAT
>LINE_comp3476_g1_i4
CACGACGCTCTTCCGATCTAAAGGCAAGACCCAAAGAAAATAGGAAAGAAAGCAGGTCGG
ATAAACACAAAAAAGAACAACCACAACCGAAGAGCGAAATTTAGATTCGCCAGATGCCAA
GGGCTATACGAGAAGTGCCCTAAAAAACTAATAGATATGGCGATAAGCGGTGATTTCTCC
GTGCTAGACAAAAAGAAGGAACTCCCGGCAGAAGTGGAAATTAAGACACTTTACGAACAA
GTGTGGGGACAAAAGGGACCAAAAGTAACCAGCAAAAAAGAGCATCCTGAAGCCACTTCC
TTACTCTCAGCCTGCCCACCATATACAGAAGAGGAAATCCTAAAAAGAATTAGGAAAATT
AAAAACAACACAGCAGGCGGACCAGACAAAATACGAAAGACTCATCTAAGGAAGAAAAGC
ATAGGAAAAACGCTGGCAAAACTATTTAACATGCTAGTGCTCACAGGTCACTACCCAACA
CCGTGGAAAATGAATAGAACCACACTACTGCCAAAACCTAACAAAGACCCAAAGGATGCA
AGGAATTGGAGGCCTACAACTATAGGCTCCCTTGTGGCAAGGATCTTCTCAGGAACCTTA
GATCAAAGAATGAGAAGAATCACAACCCTATCAGAGAGGCAAAAGGGATTTATACAAGAA
GATGGATGTAAGAATAACATAAGGATGGTGGAAACGATAGCTTCGAGGATGAAAGTAGAA
AAAGGAGGAATCATAAGTGTAATAGACATATCCAAGGCTTTTGACACCATACCGCACTCA
GCGCTGGAACCCAGGCTTAGAGAAAAGGGTATACCTGCACATATTATACAATTAATAAAC
AACGTGTACACTGATTGCAGAACAGTAATCAAAACGAAAAGCAACCAGGGAATTGAAATA
GAGATCCAACGTGGAGTTAAACAAGGAGACCCTCTATCACCCCTACTCTTTAATATAATG
ATGGACGAAATAATCGAAGACAAAAGCAGAAACACTAAGAGGATCGAAATAAATGGCAAA
GGAATAGCAGTTCTAGCGTTTGCAGATGACCTAATCATCATAGGAAGGGACAGAGAAGAC
GCACAGGAACAGCTACAGATACTGGACCAGAAACTAACAGAACTGGGTATGGAACTGGCA
ACTGATAAATGCCTCACCTTTGAAATCGTAGGAAAGAAGAAAACGTGGTACGCCAAGAAC
CCGGAGCTGAAAATAAAAAATAAGGAACTACCATACGCCAGTCCAGAACATGCGATCAGA
TACTTAGGAGTGGACATAACTCCATGGAACAACGTCCACTGCGAGGGGACCACGCAGAAG
ATACTACAATCAATAAGAAATATCGCCAAGATGAAACTGAAACCGCACCAAAAGATGGAC
CTTATTCAAAGGTTTCTACTGCCCCACTTTCTGCACAAACTAATTGCATCGGCTCCACAG
AGTACAATACTTAAGGGATTAGACCACAACATAAAGCAGGAAGTAAAGAAGATCTTACAC
CTAACACCCTCCACAACAGACGGCCTAATTTACACAACGAAGTTACACGGAGGCCTCGGA
CTTCCCAGATTAGAACATCTGGTTAAACTGGCTGTCATCAAACACGCGTTAAAAGCAGAA
GAGTACAACGACGCAGCTCTGAAAGAAGCAATACTGGAAGAGAATGTACAGAAGAAATTA
AAAGGATATGCAAACTCCCTAAGAATAAATTGGCCCACCTCCTTACAAGAACTACAGGTC
GCGAAAAAGAGGCTAAGAAGAGAAAATACGGACAGATGGCAGCAACTAATATCACAAGGA
CAAGGAGTAGAATACTTCAGAGAAGACAAGATAGGAAATTCATGGCTTGCAAACCCAAAC
TTACTAAAGCCATCAAGATACATAGATGCACTGAAACTAAGGACCAATACTTTCGGGAAC
AGAACAACGTTACATAGAGCGAAATTGAATGAAGATGTTGGAAACGCTAGGACATATCAT
TGGAGGGTGCATCAGCGTTAAACCGATGAGGATTAGAAGACATGATGAAATAAAGGACTT
GATCACGAAAATAGCAGGGCGATCATGTGCAGTATTCCCAGAACCGACAGTGCGAGTCGG
CGGCAACCTCCTAAAGCCGGACCTGATAATCAAAGACCAGGAAAAGCTAATCGTAGTCGA
CGTTACGGTCCGCTACGAGGTGGGAGGAAGCTTAAGACGAGCATATACGGAAAAGGTGGA
AAAATACAAAGAAGCAGCACAAAGCATAAAGGAAAGACTGGGATGCAACACTGCGGAAGT
CCTACCGATTGTAGTAGGGGCAAGAGGAGCCATGCCGACTAAAACGGTGAAGAATCTAAA
AATATTAAAATTTCAGGAAAAAGACTTGATGACGGTCTCAATGATAGCATTGAGGTCGTC
AATCGAGATAGCAAATTCCTTCATTGACTACGACAATATCATCTAAATTTACATTAGAAG
ATAGCAAAGAAGCGTAGATAATACGCTATAACCGCAAAATACCGAGAAGGTAATATACTA
GAACATATCAAAGTAGATCCAAAGAAATAAAATTAAACCCAATGAAGGCACTGCTTAGTA
AGCCCATGTGTAAACACGGTGCGAGTCGTATGACGTTTTCCGAGCAGGAAAACTGTCACG
GCGGCAGAGCCGAGCGGGAGAAGACGCCGCTCGGGGCAGATGCCTCCACGTGGCTTTCCC
CGGTAACACGCTTCCGGAAGCATGGCCAAATTTCGCCTTCCTTTAGAGAGGACTCTGTTA
AGACTAATTATTCCGAATCCGTTTCTAGGTGGTTTCGCTAGAAGGACATAGATACCCCAC
ACTACCCTCAAAATTTTTTTTCCTTTTTGATATAATATTGTTATAGTTGTTATTTATTCT
AAAGTTGTTAAGTTTGAAACCCAACAGGGGGGGGGGGGCAATACCCCGGAAATCCGCCTT
CTTGTAATTTACAAGCCTCGTCATCTAATTAGTGACG
>LINE_comp3476_g1_i5
CACGACGCTCTTCCGATCTAAAGGCAAGACCCAAAGAAAATAGGAAAGAAAGCAGGTCGG
ATAAACACAAAAAAGAACAACCACAACCGAAGAGCGAAATTTAGATTCGCCAGATGCCAA
GGGCTATACGAGAAGTGCCCTAAAAAACTAATAGATATGGCGATAAGCGGTGATTTCTCC
GTGCTAGACAAAAAGAAGGAACTCCCGGCAGAAGTGGAAATTAAGACACTTTACGAACAA
GTGTGGGGACAAAAGGGACCAAAAGTAACCAGCAAAAAAGAGCATCCTGAAGCCACTTCC
TTACTCTCAGCCTGCCCACCATATACAGAAGAGGAAATCCTAAAAAGAATTAGGAAAATT
AAAAACAACACAGCAGGCGGACCAGACAAAATACGAAAGACTCATCTAAGGAAGAAAAGC
ATAGGAAAAACGCTGGCAAAACTATTTAACATGCTAGTGCTCACAGGTCACTACCCAACA
CCGTGGAAAATGAATAGAACCACACTACTGCCAAAACCTAACAAAGACCCAAAGGATGCA
AGGAATTGGAGGCCTACAACTATAGGCTCCCTTGTGGCAAGGATCTTCTCAGGAACCTTA
GATCAAAGAATGAGAAGAATCACAACCCTATCAGAGAGGCAAAAGGGATTTATACAAGAA
GATGGATGTAAGAATAACATAAGGATGGTGGAAACGATAGCTTCGAGGATGAAAGTAGAA
AAAGGAGGAATCATAAGTGTAATAGACATATCCAAGGCTTTTGACACCATACCGCACTCA
GCGCTGGAACCCAGGCTTAGAGAAAAGGGTATACCTGCACATATTATACAATTAATAAAC
AACGTGTACACTGATTGCAGAACAGTAATCAAAACGAAAAGCAACCAGGGAATTGAAATA
GAGATCCAACGTGGAGTTAAACAAGGAGACCCTCTATCACCCCTACTCTTTAATATAATG
ATGGACGAAATAATCGAAGACAAAAGCAGAAACACTAAGAGGATCGAAATAAATGGCAAA
GGAATAGCAGTTCTAGCGTTTGCAGATGACCTAATCATCATAGGAAGGGACAGAGAAGAC
GCACAGGAACAGCTACAGATACTGGACCAGAAACTAACAGAACTGGGTATGGAACTGGCA
ACTGATAAATGCCTCACCTTTGAAATCGTAGGAAAGAAGAAAACGTGGTACGCCAAGAAC
CCGGAGCTGAAAATAAAAAATAAGGAACTACCATACGCCAGTCCAGAACATGCGATCAGA
TACTTAGGAGTGGACATAACTCCATGGAACAACGTCCACTGCGAGGGGACCACGCAGAAG
ATACTACAATCAATAAGAAATATCGCCAAGATGAAACTGAAACCGCACCAAAAGATGGAC
CTTATTCAAAGGTTTCTACTGCCCCACTTTCTGCACAAACTAATTGCATCGGCTCCACAG
AGTACAATACTTAAGGGATTAGACCACAACATAAAGCAGGAAGTAAAGAAGATCTTACAC
CTAACACCCTCCACAACAGACGGCCTAATTTACACAACGAAGTTACACGGAGGCCTCGGA
CTTCCCAGATTAGAACATCTGGTTAAACTGGCTGTCATCAAACACGCGTTAAAAGCAGAA
GAGTACAACGACGCAGCTCTGAAAGAAGCAATACTGGAAGAGAATGTACAGAAGAAATTA
AAAGGATATGCAAACTCCCTAAGAATAAATTGGCCCACCTCCTTACAAGAACTACAGGTC
GCGAAAAAGAGGCTAAGAAGAGAAAATACGGACAGATGGCAGCAACTAATATCACAAGGA
CAAGGAGTAGAATACTTCAGAGAAGACAAGATAGGAAATTCATGGCTTGCAAACCCAAAC
TTACTAAAGCCATCAAGATACATAGATGCACTGAAACTAAGGACCAATACTTTCGGGAAC
AGAACAACGTTACATAGAGCGAAATTGAATGAAGATGTTGGAAACGCTAGGACATATCAT
TGGAGGGTGCATCAGCGTTAAACCGATGAGGATTAGAAGACATGATGAAATAAAGGACTT
GATCACGAAAATAGCAGGGCGATCATGTGCAGTATTCCCAGAACCGACAGTGCGAGTCGG
CGGCAACCTCCTAAAGCCGGACCTGATAATCAAAGACCAGGAAAAGCTAATCGTAGTCGA
CGTTACGGTCCGCTACGAGGTGGGAGGAAGCTTAAGACGAGCATATACGGAAAAGGTGGA
AAAATACAAAGAAGCAGCACAAAGCATAAAGGAAAGACTGGGATGCAGCACTACGGAAGT
CCTACCGATCGTAGTACGAGCAAGAGGAGCAATGCCGACTAAAACGGTGAAAAATCTAAG
AAACTTAAAATTTCAGGGAAAAGACTTGATGACTACGCTATAATTGCTAAATACCGAGAA
GGTAATATACTAGAACATATTAAAGAAAAATAAAAGAAATAAAATTAAACCTAATAAAGG
CACTGCTTAGTAAGCCCATGTGTAAACACGGTGCGAGTCGTATGACGTTTTCCGAGCAGG
AAAACTGTCACGGCGGCAGAGCCGAGCGGGAGAAGACG
>LINE_comp3488_g1_i1
CATAGGTTCTCGCCGGTAACATGGTTTCTTTCCTTGGAAAGGAACCATGGCTAAACGGCG
TGCGGCGAAGGCTCACCCTAAGGACCTTCGGGTCCATGCGCCTGCCCCCCGCCTTAGGGC
CGGGGTGAGTCGGCGTCCAGAGCAATCTGGACGTCCGGGGGAGGCTGGAGCTATGCTCCC
CGACGCGGCGGGTTGCCACCCCGTCGCGTTGGTATGTCTGCTGGCCCAAAAAATAAAAGA
GAAGTTAATCTCCGGCGAGGGCCTCGGCTCGCCGGTCCAGCAGACCAGGCCATGGAGTCC
CAGCCGTCAGCTGGGCCCGCACCGCCGCGACGACGTGCCCCAACTCGTCGTCCGGCTACC
GTTCCACCCACCCAAGTGTCACCACAGAACACCAGTGGTGCAGACCCAGGTGCGCACAGT
CCGCGTCTGGGCTTTTTATGCCCAGATTGTGACCGCTCCTTCCTGCCCAAAATTGGACTA
GGAGTGCACCGACGTCGCAAGCATCCGGAACAGGCGAGCGCGGAAGTCAATGTCGAGCGG
GAGAAAAAGCGCTGGAGCGCAGAAGAACTGCGCTTGATGGCGAGAGAGGTGGCACTGGCC
GTCGCTCGGGGGGTGCGGTTCGTAAACCAACATCTTATGACCGCACTCTCCTTTGAGCGT
ACCCTTGACGCCATTAAAGGTGCGAGGCGTGGAGGGGCTTACAAAAACCTTGTAAGCCAA
GCCCTCCGCGACCTCGAGGCGTCAGGGGTGACCGATGACGACAGTGACTCCTCCTTTCGC
TCCGCCACTGGTGACCCCAGTGACATTTCGCAGCGGAGCGAAGGTGTGTCCGGGTTCATG
TTACCTACGAACCCGGCACACCCGCCATCGCCCTGCTCGCCAGGGGAGGGGAGTGAGACC
CCGCACGCCGGATACCACTCGGCTATAGGGAGTTTAATCCCTGTAGTCGGGTGTATCAAG
GGGTTCGGCACGCTCGCTCTCGTGAGGACGGCTCGTAACTTTCTTCGCGGGAGCGATGTC
GTTGCCGAACTCAGTGCGTGGGTGAAGGAAGTCTTCCCCACTCCTCCCCCAAGACGACCG
CGTCAGCCGACTCCGGATGCTACCATCAGGGTGCCGAAGAAGCGACTGCGTCGCCGGGAG
TATGCCCGCGTACAACGGCTCTTTAAGACAAATATGTCTAGAGCCGCCAGGGAGATCCTC
GACGGGCGGACGGAGACGCGGACCCCAGATGTTGCAACTATGACTGCACACTGGGGTCCG
TTTGTCTCATATCCGTCTTTGCCCGTCATGGAGGATAGGCGCCTGCCATCTGCGCCCTCC
CTGGAGTACGTGTGGCACCCGGTGACATGTGACGAGGTCACAACCGTCGCAGTGTCCATC
TCTTCGGCACCCGGTATTGATGGTGTCACGGCGAGACAGTGGAGGGCGGTTCCGGCGAGC
ATTAAAGCCCTCTTCTTTAACATCGTGCTTGCGTCGGGCGGATTCCCTCCGGAAATGCTC
ATAAGCCGGACCGTGTTCGTTCCAAAGCGTGATGGGGCGTGCGAGCCGGGGCATTTTCGG
CCAATCAGCGTCGCGTCGGTCATCGTGCGTCACATCCACAAGATCTTAGCCAAACGCTTA
CGTGAGGCGGACCTTGTGGATGTGAGGCAGCGGTGCCTCGACGATGGTTGTGCCGAGAAT
GTCTCGGTGTTGGCTTCACTGCTCGAGGACTCGCGGCGGCGTCTGAGAGAGATACATATC
GTCTCCTTAGATGTCGCCGCGGCCTTCGATGCGGTGAGCCACCACGCCGTCTCATCCGTC
TTGGGACGAACCGGTCTGCCGGAGGGATTTTGTAATTATATTGCCCGACTGTACCGCAAC
AGCAGCACGGTGTTTGAGGTTGAGGGCGCCCGCTCGGAGCCGTTCCTCGTGCGCAGGGGA
GTCAGGCAGGGTGACCCTCTGTCCTCTCTCCTGTTCTGTCTCGTCGTGGACGAGGTACTA
AGAGCCGTACCTCGCGACGTCGGTTACGAGCTAGGACGGTGTCGCGTAAACGCGTTTGCC
TACGCGGATGACATCGTCCTAGTCTCGTCGACCAGGTTAGGCATGGCCGCGACCCTGCTG
GAGGTTGAGGCGCGGGCTAGGGAACAGGGGCTCTCGTTTAATGCACGCAAAAGCGTGTGT
CTGTCCATCGTACCTGCCGGTAAGCAGAAGAAATACAAGGTCCTGGTTGATCCTCAGTAT
CGTCTGGCCGACGGCGAAACAGTCAAACAGCTGGCGCCGGCGGACCAATGGCGGTACTTG
GGGGTCGACTTCAGGCCTGTAGGACCGAAGCGAGCCGGCAGTGTACTGACCACCGAGATG
GACAGACTAACGAGAGCCCCCTTGAAGCCGCAACAGCGGCTCAAGATTCTAAGATCGTTC
CTTATCCCGCGCTTCTACCACGCGCTTGTTCTGTCGGGGATAACTCTGGGTAAACTCAGA
GCCCTCGACAAGCAGGTGCGTGATGCCCTCCGCAGGTGGCTGCGGCTCCCGCACGATACC
GCCGTTGGATACTTCCACGCTTCGTGCAGGATGGGAGGCCTTGGCATCCCATCCTTCGCC
ACCACCGTTCCCGGTATAATGGCCACCCGGCTATCCCACCTAGCCACCTCCTCCTCTCCA
GCCGTCAGAGCTGTTGCCGAGTCCAGCTGGGTCAATAAAAGGCTCAGCTGGGCGGAGCAC
GCTCTGACGAGGGACGGGGAAACCATGTCCTCTAAGGAGAGGAGAGAGGAATGGTGGGCC
AAAAAGTTATACCGGTCGGTGGATGGCTTCGAACTGCGCGAGTGTGGGAGGTCCAACCTT
TCCAGCTGGTGGATCGATGCGGGATCCTACGGTATACCCGGACGGGACTATGTCCAGTAC
CATCACGTCCGGGTTAACAGTCTGCCCACGCGAATTAGAACTTCGCGTGGTATCCGTCGT
GAGACCAGAGAGCTGCAGTGCCGGGCGGGCTGTAAAGCCACCGAGACGGCCGCCCACGTC
ATCCAGGCCTGCCATCGCACTCATGGTGGTCGCATCAGGCGACACGACGCTGTGAGTGCG
GTCATAGCCTCTGGTCTTCGCGACGCGGGGTGGACTGTTGCCGTAGAGCCTCGGTTCCAC
ACTTCAGTGGGACTGAGGAAGCCTGACCTGGTCGCCAAAAGGGGCGGTCACGCATGCGTG
ATTGATGCGCAGGTGGTCAGCGGAACAACACCATTGGACGACCAACACGAGAGGAAGAGG
AAGTATTACTCGGGGAATCCCGATATCCACCGCACACTAACGGAGGATGGAGGGATCTCC
CCGAGTGATATTTCCTTTGCCACTTGTACCCTCTCATGGAGGGGAGTGTGGTCGTCCAAA
TCCGCTGACTCCCTCCTGGGTCTGGGGCTCCCCAAGAGGCTACTCTGCGGT
>LINE_comp3508_g1_i1
GCTTGAACGAATGATGGTGAATCGAGCCGAGAGTAGAATGAATGGTAGGATGAATGAGGC
CCAGCACGGGTTTAGGAGGGGTCGGTCCACTGAGAGTGCATGGTCGAAAGTCCGAGAATA
TGTGGAAATGAGTGAATGTAAATATGTGTTAGGTATGTTTGTGGACTTTCGAGGAGCGTT
TGATTATTTGGAATGGAAGAGCGTGATCGAGAGGTTGAGTGTGATTGGATGTGAAGAGAG
TGGGTTATGGATGAGTTATTTTAGGGATCGTATGGTGTGTATGAGCGG
>LINE_comp3508_g2_i1
AAGACTGTATGATGTGTGTTTGAAAACAAACTCTTTCCCGAGTGAATGGAAAAAGTCGAG
AGTGATTGTGTTACTGAAATCCCCCGATAAGGTGCGTACTGACCCCAGATCTTATAGACC
GATCTGCTTGTTGCCCGTGCTGGGCAAAGTGTTGGAACGAATGATGGTTAATCGTCTTAT
GTGTAGTATGAATGTGAGTATGAATGATGCCCAGCATGGGTTTAGACGGGGTCAGTCCAC
CGAGAGTGCGTGGCTGAA
>LINE_comp3508_g3_i1
GTCACTCTGGTGAATGATGTGTGGGCCAGGTGTCAGTTTGAATGGGAGATTAAGAATGAT
TGGGGTGTGAGTGACCATAATGTGATAAGTATTAGAGTAAGTTGTGAGAATGAGTGTGAG
AATGTGATTGTAGCCGGGCGGAGGTGGTCCAGCAAAGGAGATGATTGGGACGGATACGTG
AGTGAGTTGAAGGAATGTGCTGCTGTGAATGGTGTGAACGTTCGAATGGATGCGAGTGTG
GATGAACTGTGGGAGTGCGTGAAATCATGGATCTACGTTGCGAATGAAAGACGTTTGAAA
GAGATTAAGCGAGTGAATGCTAGAAAGCATGTATGGTGGACGCGTGGTTTGGAACGAATG
AAGAAGCGTGTGAGAAAGATAAGGAAGCAATTCCAGAGAGCAAGGAAACGAGGAGTGAAT
GTGAACGAGAGAGAGGAGGAATATAAGAGATGTATGCGTGAATATAAGAGAGAATTGTGT
CGTGTGAAAGAGAAAAACTGGCAACAGTTTGTGAGTAAGTGGAGCAACGTAGATCCATGG
GGATCGGTATATAAGGTCTGCAGAGGAAAGAAAGGGAATGAGCGATTGAGCACGTTGAAT
GTGAATGGAAGGATGACGAGTACGTGGGAAGAGAGTGCGTGTGCTTTGCTGGACACCCAT
TTCCCGGCTACGAGAATGGGTGCTGTGAGTGAGTATGATGGTATGCGTGATGGTCACACG
AGTGTTAGTAGTTTTGAATGGTGTGAGATTGCTGATGCAGTGAGTCGTGTGAAAATGCGT
AAGGCACCTGGCCTAGATGGTATATCTGGAGAGATTGTGAAGCGTGTATGGTGTGCGATT
CCGGAGTGGATGATGAGATTGTATGAGGAATGTTTGAGAACT
>LINE_comp3508_g4_i1
GCAACATGGATCCATGGGGTTCAGTGTATAGAATTTGTAGAGGAAAGAAAGGCAACGAGC
GATTGAGTACGATGAATGTGAATGGTAGGACAACGAGTACATGGAAAGAGAGTGCGTGTG
TCCTGCTGGATACACATTTCCCGGCAACACAAAGAGGTGTGATGAGTGAGAGAGAGAGTG
TGTGTGAGCGTGTAATGTGTGAAAGAGAGTTTGAATGGAGTGAAATAGAGGATGCTGTGA
GACGAGTGAAAGTAGGAAAGGCACCTGGTCTTGATGGTATAAGTGGTGAAGTTGTGAAGC
GTGTATGGTGTGCGATTCCGGAGTGGATGAAGCGAGTGTATGATGAGTGCTTGAGGAAAA
ACTCTTTCCCGAATGAATGGAAAAGAGCGAGAGTAATTATGTTACTAAAATCCCCCGAGA
AAGTGCGATCCGACCCC
>LINE_comp3508_g5_i1
GGGAGTGAGTGATCACAATGTGATAAATGTGAGAGTGAAGTTTGCAAGTGCGAGTGAGAA
TGTTATGTCGTTTGGGAAGAGATGGACCAGCAAGGGTGTTGATTGGGAAGGATATATGAG
TGAGATGAAAGAGTATGCTGCGATGAATGGAGTGAATGTGAGAGAAAATGCGAGTGCGGA
TGAATTAGTAGATATCGTGACCTCATGGATCCATGTTGTGAATGAGAGGCGAATGAAAGA
GTTGAAGAGAGTGTATGAAAGGAAGCCTGTATGGTGGACGCGTGAGCTTGAGAGAATGAA
GAAGAATGTTAGAAAAAGAAGAAAGAAATTTCAGAGTGCAAGGAAGAGAGGAGTGAATGT
GAACGAGAGAAAGGAAGAATATATGAGATGTTTGAGTGAATATAAGAAAAAGATATGTAG
GGTGAAAGAGACGAACTGGCGACAGTTCGTGAGTGAAAGGGCCAACATGGATCCATGGGG
CTCCGTATATAAGATTTGTAGAGGAAAGAAAGGGAACGAGCGACTGAGTACAATGAATGT
GAATGGTAGAATGACGAATACATGGAACGAGAGTGCGTGTGCCTTGCTGGAAAACCTCTT
TCCTGCTTCGGGAATGAATGATGTGAATGTGTTGAATGATGAATTGGATGGAAGGATGAA
TGTGAGAGAATTTGATTATGATGAAATAGAGAGAGCGGTGAAAGGTGTGAAAATGAGGAA
GGCACCTGGTCTAGATGGTGTGACTGGTGAGATGGTGAAGCGTGTGTGGTATGTTATTCC
GGAATGGATGAAAAGAATGTATGATGAGTGCCTGAAAACAGGATCTTTCCCGCGTGAATG
GAAGAAAGCGCGAGTCGTGGTATTGTTGAAGTCCCCCGAAAAGGTGCGATCCGACCCCCG
GTCGTACCGTCCGATTAGTTTGTTGCCCGTGCTGGGAAAAGTATTGGAGCGAATGATGTT
GAATCGTATTGAGTGTAGAGTGAATGAGAGAATGC
>LINE_comp3508_g5_i2
CGCTGCTGTCAAGGCTGCTTATTCCAGAATTTGTGAGTTGTTGGAGATGGAAAATAATGG
AGCAAACTTGTACAGCGTAGAATACGTTGTCGGGCAACGGCACGAGGATTCAACAGACAA
GACTGGGTACGGATCCAGAAGACTGGTTGTCCTGTCTTACGGAGCTGCTATGAGGAGAAT
CCACCAGATTGAGAACAGCGCTGATTATCTGTTGCTGGATGAGATCCATTGCAGGTCAGA
CCCGACAGTAGTAGATGTGAGAGAAAATGCGAGTGCGGATGAATTAGTAGATATCGTGAC
CTCATGGATCCATGTTGTGAATGAGAGGCGAATGAAAGAGTTGAAGAGAGTGTATGAAAG
GAAGCCTGTATGGTGGACGCGTGAGCTTGAGAGAATGAAGAAGAATGTCAGAAAGAAAAG
AAAGAAATTTCAGAGTGCAAGGAAGAGAGGAGTGAATGTGAACGAGAGAAAGGAAGAGTA
TATGGAATGTCTGAGAGAGTACAAGAGAAAGTTGTGTAGAGTGAAAGAGACGAACTGGCA
ACAGTTCGTGAGTAAATGGGGCAACATGGATCCATGGGGTTCAGTGTATAGAATTTGTAG
AGGAAAGAAAGGCAACGAGCGATTGAGTACGATGAATGTGAATGGTAGTTTGACGAATAC
GTGGAATGAGAGTGCATGTGCCTTGCTGGGAACCCTCTTCCCTGTTTCGGGAATGAATGA
TGTGAATGAGTTGAATGAAGTTTTGAATGGAAGAGTGAATGTGAGAGGTTTTGAATATAG
TGAGATTGAGTGCGCAGTGAAAAGTGTGAAAATGAGGAAGGCACCTGGTCTAGATGGTGT
GACTGGCGAAATGGTGAAGCGTGTGTGGTAT
>LINE_comp3508_g6_i1
AGAAGCGTGTAAGGAAGGTACGAAAGAAATTTCAGAGAATGAGAAAAAGAGGAGAAAATG
TGAGTGTGATTGTGGATGAATATAAGACATGTTTGCGTGAATATAAGAGAGAGATTTGTA
GAATGAAAGAGAAGAATTGGCAACAATTCGTGAACAAATGGAGCAACTTGGACCCCTGGG
GTGCTGTGTATAAAATATGCAGAGGTATGAAAGGTAATGAGCGGCTGAGTACGTTGAATG
TGAATGGAAGTATGACGAATACGTGGGAAGAGAGTGCCTGTGCTTTACTGGACACACATT
TCCCGGCCTCAAGTATGGGTGATGCAAGTGTGAATAGTGTGATTGGCGAGCGTGTGTGTG
ATAGTGGGTTTGAAAGAGGAGAGATTGAGGATGCTATGAAAAGGGTGAAAATGCGTAAAG
CACCTGGCCTCGATGGTATGAGTGGTGAGATTGCGAAGCGTGTGTGGTGTGCGATTCCAG
AGTGGTTGATGAGATTGTATGATGAGTGTCTGAG
>LINE_comp3508_g2_i2
AAGACTGTATGATGTGTGTTTGAAAACAAACTCTTTCCCGAGTGAATGGAAAAAGGCGAG
AGTGATTGTGTTGCTGAAGTCCCCTGATAAGGTGCGAACCGACCCCAGATCTTATAGAGC
GATATGTTTGTTGCCCGTGCTGGGCAAAGTGTTGGAGCGAATGATGGTTAATCGTCTTAT
GTGTAGTATGAATGTGAGTATGAATGATGCCCAGCATGGGTTTAGACGGGGTCGGTCCAC
AGAGAGTGCATGGATGAAAGTTAAGGAGTATGTGGGAGCGAGTGAGTGTAAATATGTATT
AGGTGTGTTTGTCGATTTTCAAGGAGCGTTCGACAATTTGGAGTGGATGAGAGTGATTGA
GAGATTGAATGTGATTGGATGTAAAGAGATTGGGTTATGGATGAGCTATTTTAAG
>LINE_comp3508_g5_i3
GGGAGTGAGTGATCACAATGTGATAAATGTGAGAGTGAAGTTTGCAAGTGCGAGTGAGAA
TGTTATGTCGTTTGGGAAGAGATGGACCAGCAAGGGTGTTGATTGGGAAGGATATATGAG
TGAGATGAAAGAGTATGCTGCGATGAATGGAGTGAATGTGAGAGAAAATGCGAGTGCGGA
TGAATTAGTAGATATCGTGACCTCATGGATCCATGTTGTGAATGAGAGGCGAATGAAAGA
GTTGAAGAGAGTGTATGAAAGGAAGCCTGTATGGTGGACGCGTGAGCTTGAGAGAATGAA
GAAGAATGTTAGAAAAAGAAGAAAGAAATTTCAGAGTGCAAGGAAGAGAGGAGTGAATGT
GAACGAGAGAAAGGAAGAGTATATGAAATGTCTGAGAGAGTACAAGAGAAAGTTGTGTAG
AGTGAAAGAGACGAACTGGCAACAGTTCGTGAGTAAATGGGGCAACATGGATCCATGGGG
TTCAGTGTATAGAATTTGTAGAGGAAAGAAAGGCAACGAGCGATTGAGTACGATGAATGT
GAATGGTAGTTTGACGAATACGTGGAATGAGAGTGCATGTGCCTTGCTGGGAACCCTCTT
CCCTGTTTCGGGAATGAATGATGTGAATGAGTTGAATGAAGTTTTGAATGGAAGAGTGAA
TGTGAGAGGTTTTGAATATAGTGAGATTGAGTGCGCAGTGAAAAGTGTGAAAATGAGGAA
GGCACCTGGTCTAGATGGTGTGACTGGCGAAATGGTGAAGCGTGTGTGGTAT
>LINE_comp3508_g8_i1
GTCACTCTGGTGAATGATGTGTGGGCCAGGTGTCAGTTTGAATGGGAAATAAAGAGTGAT
TGGTGTGTGAGTGATCATAACGTGATAAATGTGAGAGTAAGGTGTGTGAATGAGAGTGAG
AATGCTATGCGTGTCGGAAGGAGATGGTCCAGTAGAGGGATTGACTGGGATGGATACATG
AGTGAGTTGAAAGAGTGTGTAGCTTTAGACGGTATGAATGTTAGTGAGAATGCGAGTGCG
AGTGAATTATTAGAGTGTTTGATGTCATGGATCTACGTTGTGAATGATAGGCGAATGAAA
GTGTTAAAATCTGGAAGCATGATGAAGCCTGCATGGTGGACGCGTGAGTTAGAGAGAATG
AAGAGGAATGTAAGAAGAGTACGGAAGAAATTCCAGAGAGCAAGGAAGAGAAGAGTGAAT
GTGAGCGAGACTGAAGAGGAATACAAGAGATGTATGCGTGAGTATAAAAGAGAGATTTGT
CGTGTGAAAGAAGCGAACTGGCGACAGTTCGTGAGCAAATGGAGCAACGTAGATCCATGG
GGTGCGGTGTACAAGATTTGTAGAGGTAAGAATGGAAATGAGCGCTTGAGCACGATGAAT
GTTAATGGGAGAATGACGAGTACCTGGAAAGAGAGTGCATGTGCTCTACTGGACAGCCTC
TTTCCGGCATCGCAGATGCGTGATACGAGAGAGGCTGTGTGTATGCGAGATGAACGAGTG
AGTGAGAAACGTTTTGAATGGAATGAAGTTGTGGATGCTGTGAAGCGAATGAAAATGAGA
AAGGCACCTGGCCTAGATGGTGTGACTGCAGAAATGGCGATGCGTGTGTGGTATGCAATT
CCGGAATGGATGGTAAGAGTGTACGATGAA
>LINE_comp3508_g5_i4
GGGAGTGAGTGATCACAATGTGATTAATATACGAGTGAAGTGTATGAATGAGAGTGAGAA
TGTAACTTCGTTTGGAAAGAGGTGGACCAGCAAGGGCGTTGACTGGGGCGGATATATGAG
TGAGTTGAAAGAGTATGCCGCGGTGAATGGAATGAATGTGAGAGAAAATGCGAGTGCGGA
TGAGTTAGTAGAGACAGTGACCTCATGGATCCATGTTGTGAATGAGAGGCGAATGAAAGA
GTTGAAGAGAGTGTATGAAAGGAAGCCTGTATGGTGGACGCGTGAGCTTGAGAGAATGAA
GAAGAATGTTAGGAAGAAAAGAAAGAAATTTCAGAGTGCAAGGAAGAGAGGAGTGAATGT
GAACGAGAGAAAGGAAGAGTATATGAGATGTCTGAGTGAGTATAAGAAAAAGATATGTAG
AGTGAAAGAGACGAACTGGCAACAGTTCGTGAGTAAATGGGCCAACATGGATCCATGGGG
CTCCGTATATAAGATTTGTAGAGGAAAGAAAGGGAACGAGCGACTGAGTACTATGAATGT
AAATGGCAGAATGACGAATACATGGAACGAGAGTGCGTGTGCCTTGCTGGAAAACCTCTT
TCCTGCTTCGCGAATGAATGAAGTGACTGAATTGAATGATGAATTGTATGGAAGGATGAA
TGTGAGAGAGTTTGATTACGTTGAGATTGAGAGAGCTGTGAAAGGTGTGAAAATGAGGAA
GGCACCTGGTCTAGATGGTGTGACTGGTGAGATGGTGAAGCGTGTGTGGTGTGTTATTCC
GGAATGGATGAAGAGAATGTATGATGAGTGTTTGTATACAGACTCTTTCCCGCGTGAATG
GAAGAAAGCGCGAGTCGTGGTATTGTTGAAGTCCCCCGAAAAGGTGCGATCCGACCCCCG
GTCGTACCGTCCGATTAGTTTGTTGCCCGTGCTGGGAAAAGTATTGGAGCGAATGATGTT
GAATCGTATTGAGTGTAGAGTGAATGAGAGAATGC
>LINE_comp3517_g1_i1
TATTTATTTATTTATTTATTTAATTACTTATCTATTTATCTATTTATTCATTTAATTAAT
TACTTAGTTAGTTATTTATCTATTTATTTATCAGTTTATCTATTTCTTTTACAATTTAAC
TATTTAATTATTATTCTTTTACTTTGATATTCTATATTTCCTACTTGCTTTACTCACCAC
ACGTATTTGTCTATCTATTTTATATACTTTAACTCACTACGCTATTTTAAATCTCTTAAC
TATTTCATACACCTATTTTATTTACTGACATAATTATGCTATTGTACTGGTCTACTTAAC
TAATTTACTTCTTTTTTTCTTATCGACCTGACTATTTATGTTTTATCATCGACTAGAATT
TTAACTAACATCTATAATAACGGGACACTGGTTTTAATTCATTGACATTTTCTTTCCATC
TTTTGTTTCATTTTATTTCTTATACGCCTGTCAATATGTCTATCACTATTTTAACTACGC
TTCTTAACTGCTACGCTACTATATACTAACAATATGCTTTTAACATCTTGGCGCCGTCCG
CTCTAGCCCTACGCCTGCCGCTTCATGCACCCGCGCACATATACGCCCTAACAATATTCA
CTATTAATGCTATTAACCTATGTACAAGTATGGTATCTACTATCTTCATGTCTACCTATT
TATTTATTTAACTACACATTATTTTGTACTTATTTATTATTTTATTATTTTATACTTATT
TATTATTTTGCATCTATTTATTATTTTATACTTATGTATTATTTTGCATTTATTTATTAT
TTCGTTCTTACTTATTATTTTGTATCTGTTTACTATTTATTATGCTCTATTTATCTAGTC
GTTTAATTTATATGGCGAAGGACTGGGTACTTAATGTCCCGACACTGGCTATCCTAATTA
TTATGTACATCCACTAACGAACGCCCCTATCTGTGTATTCATAATTATTCTGGCCTTTCT
TTGATTCTATACTATTTATTATTTTATACTATTTATTTAGTTATTTATTTAGTTACGTTT
TTATGTTTATTTAATTAATTGTCTATTTATTTACTTATTTAATGGTTTGTTCTATTATTT
AGTCATTTATCTACTTGTTTATTTATGTAATTTATGTATTTTAATTTATACGTCTACGTA
TGTACCTGATTAGTCACTTAATTAAGTGAAACAATTTATATATTTATCTACCTTCGCCAA
TAAGGCGTAATACTGTACCTACCCCCGGCCGAACATTGTAAGGCCGGGGGAACATTTATT
GAAAAATAAATGCCTTTATCATATCACACATATAGATCGCTTCTCGTCCTTATGGCTAAG
ATCAAAGTGTA
>LINE_comp3519_g1_i1
TGAATGGCAAACGTTTCATAAGGTCACAACCACCAATATCTGATGTTCTGTCTGTGTTTG
TCTCTTTTATCTACATTAGATAAGTTATAGTTGTAACGCATGTCTGGGTCATTGAATCTG
ATATTCTTGTCATATGTGATATGTTTGTCAAAAGTTCTTCTGTGTACATGGTAAATTATT
GGCACATTTTCTGAATTTTGTATGTATCCTTCACTATCGAGATAGATGAAGGACTCTGGT
GGGGTATATCCTGTTACCATGGCTTTTCTGAAGTATAGAGGGTTTGGAAAAGTGGAGCAG
TGAATGAGACTATTGGTTGTAACATTATGAACGTTAGCCCAATGATTTCTGATTAGCTTT
AAAATAAATAGGTCTATTCTGATGATGTTGGCTTCTTCGTATAGTCTGTGGTTCTTGACG
AGCTTAGTAAAGTTGGACTCTGGTGTCCGGTATCTGCTGAGGCAGGCTCTCAGGCATTTC
CTCTCGAAGACTCGCAGTTGTTCCATGGTTCCAGCGCTGATGTTGTACCAGATGGGACAG
CCGTAGGTCAGGATCGGTCGTATAAGAAGCTTGTAACAAAGAATTTTGACGCGCTTATCA
AGGTCTTTTGAATAGAAAAGTCGTTTATTGGATAAGAATGCTTTCTGTGCTTTTTCTATT
TGTAAACTAACATGCAAATTATAATTAAGTTTAAAGTCTATATGTATGCCTAAGTAGCGA
ACAATGTTTTTATGTGGAATTTTAGAATTTGGATTTAACCTGTCGTGGATTTGAAATTTG
CCAGCATGTTTACGTGTATCGTAATTGGCATCTGATATGATTGATATATATGGTCTGAAC
AAGATTGTTTCACATTTATTGATGTTTAGTTTTAATTTCCATGTATGGAGGTAGTCCTGA
ACTTTATTGAAAGTTTCTTGTAGGGTTGACTGGATTTTTGATACTTTATTATCTCTAGCA
TAGATTAATAAGTCATCTGCAAAAGCTATTGCCATTCTGTTATTGTCGCTATTTAGGCTA
TACATTTGTAAAAGGTCGCTTATAAATATGTTGAACAAGACAGGAGAGTTAACTGTGCCT
TGTTGTAGGCCATTGTCGATTCTAAAAGATCTGCTGGAACTGACTTGTCCATTTACTACA
AAGAATTTTTTATCATGCAACATGTTCCAAATGATTTTAATTAAATGAATAGGAAATTCT
TTCTTTAATAGTTTAAAGAAGAGTCCATCCAACCAAACAGTATCAAAAGCTTTTTCTAAG
TCTATGAGGACTGCACCAATGCAGTCTCCTGCATTTCGTGCCCAGCAAATGTCTGAGGT
>LINE_comp3519_g2_i1
GGACTGCAAAATCAATTGCTTTCAGAATGTTTATGTTTAGGACTTGTATGAATTTGTCTA
TCTCATTTATTGTGAGATTTCTGTCATTGGGTATGTCAGTGTCATCGTTTTCAGTCAGGA
ATGTTTTGTATTTTGACCAGTCAGCTTTGTGAAAGTTGTACTTTATGTTTCGAGTTGTTT
CCTCAAACGTAAAATGTTCTGTGGATGGGATGGATATTTTCATGATAGTGGCCCTATGGT
CACTATCATATTCGAATGATTGTAGGAGATTAGGAGAAGGTGTGTTGTGGAATTGGATTC
TGTTATCCGCCAAGCAGTGGTCGATGAATGCCCCACTTTTTGGATATGAAGGGATTGTCG
TACTATATAAGGAGATCCTGTAGGTGATTTGATTTTCGAGGAGCCACTTGTTTAGTGAAA
CTCCCCGAGCATTATTGATAGTGTTACCCCATGTAGAGTGTTTAGCATTTAGGTCTCCGG
CCAACAAATAATAATTGCCTGGCTTGTGTAATTCCAGAGATTCAAAGAGGGTTTTAAATT
CCATCATAAATTCTTTTTTACAGCTACTGGTTGCATAACCCGCTATCAAATAAAGTTTAT
TGTTATTCTGAAATTTAATTTCTATTGCCGTTGATTCAAAACAAGTACTGTTTTTGATAA
TATTTAGTTGGATATTTTTGAATTTGATATCTTTGCGAATTAATATCCCGGTACCTCCCG
CTTGTTTGGAATTTAGCCTATCGCGTCTGATAAAGTTATAATCTTTAAAGCTTATTTTAT
GTACCGGATTTAGCTTTGTTTCACAAAGCAAAGCTACATCCGGTTTGTATATGTTTAAAC
AATCCAGGAGGGTGACTCTTCTTTCATTCGTTATAATCGAATTTACGTTAATTTGAATTA
TATTGATATGTTGCAATATCAATTGTTTAACTATGTTTTCTCGCGGATCGAGTGTCATTG
TTTATATGTCAATTTCGAGCGCTTCTGCTATTATATTTATTTTATTCGCGTTAGCTGTAA
TGTTCTCCGTTAGCGTGGCTAGTTGGGAACTGATGGTGGCCGTTATAATTTTTTGAATTT
CCTCTAGAAGAGATGGCTGTGATGTTTGCGTTACGTTTACTTTGGGTTGAGTGTTTTTCT
TTTTTGTTGTGGTACTGCAATATTGGTTTTTTTATTTGTTACTATTGAACTATATGAGAT
GGTTGGTTTGACTATATTCTGATATGATTTAGCCTTTTTTTCGTTCTCTAGTTTTAATTG
TAATGTACGTTCCTGTATTTTTTGTTTTATTTCTTTTAATTTTGGACATCCGCGGTACGA
AGCAGGG
>LINE_comp3530_g2_i1
ACGTCTATCCCGCTTCCACTCAATATATCGATTCTCTGCCTTTGTCAAGCTGTGCTCGAG
TCAATTTCTGGAAACAAATAGCTTCCTTTCGTTTTTTTCTGCTCGGTTAAATTCCACTGC
TGGCACTCTAAATTGTGGAATTTAAGTGAGCATTACTGTACTCAGGTTTAAGATATTTCT
AACGTTCAGGGTGTAATTTAACCACTGCCACGCTCGCTGCTCCATCTCTGCCTCTTGAAA
AATATGTTTTTTTTTAACGAAGGAAAATAAGTCACGTACACCCGTATAATTGTAGCTGCA
CGGGTGGCGTGGGATTCCACACATCGGAATGCCTTTACTCACTAAAAACTCTTCAGCCTC
TGATCTCTTCTGGTTCCAGAGCTAGAAGTCAGCCTCTGGAATCTCATGTATATGATTGTC
GCCGGGGGCAAC
>LINE_comp3533_g2_i1
TGGAAAGGGCGTCACCCGGGAGGGCGACTTCATTTCGTCCCCACTCGTGGGATCAATTAT
GGTCAGAAATAACAAATCAAACAAATCAAAGAAGATGACGGTGGTCGAGGTGCAAAAGGC
CCTCGTTGAGAATGAACACGCTTGGATGGCTGATGAGGAGAGGGCTTCACCCCCCCTTGT
CACCGTCCAAGCAAAGCCGGGTGATACCCAAGAGGTATCACGCCGGAAGAGAAGAATGGA
CAGGCCGGAAGGTTCCGACTCGGAATCCGGCACAGAGAGAAAAACTGCCTCTCAGAGGAA
GAGGCAGAATAAAGAAACTAAGCAGGTAGAGGTGACTACCGCAGAGCCTGATGACGATCA
AACGCCACTGGAAGTACTGTTTGAACAGTGCAAGAAAGTGGCGGATCAAATTCAGGCTAC
GAGAGACCCAAGGCATGCTGGTGATCTTGAAAAATTCAAGTATATCACCTTCATCGCCAG
GGAATACGCGATAGAAGTTGAGGAGAAATGTAAGGCGCTTGGAGAAGCCGAAAGGCGGAT
CCAAGCCCTCACAGAAGAGAGAGAAAGCGAGATAACAGTGATGAAGAAGAAGCTTGAGGA
TGCCGAAAGGCAGATACAAGCTTTAAAGAAAGAAAGGGCGAGTGCATGCGCCCAAGTAAG
GCCAAAAGCCTTAACAGTGAAGCCTACTTTGGCTGAAAAGCCAAAGAAGGCTGTGACCCA
GTCGTACGCGACTGCGGTCAAACAAAACAACACTTTGAAACCAAAGGGAGCGGTGCGACA
CGTCGTCACCGTTTACCTTAAAGAAGAAGGGAACAAAGATAGCAAGGCAACGAAAGTTGC
CTTGCAA
>LINE_comp3533_g2_i2
TGGAAAGGGCGTCACCCGGGAGGGCGACTTCATTTCGTCCCTACTCGTGGGATCAATTAT
GGTCAGAACAAACAAAAACAAACAATCAAAGAAGTGGTCGGCGGTTGAGGCGCAAAAGGC
CCTCATTGAGAAAGAGGAGGCTCGGATGGCTGATGAGAGGGCTTCACCCCCCCTCGTCAC
CGCCCAAGCAAATCCGGGTGATACCCAAGAGGTATCACGCCGGAAGAGAAGAATGGACAG
GCCGGAAGGTTCCGACTCGGAATCCGGTACAGAGATTAAAGCTGCCTCACAGAGGAAGAG
GCAAAACAAAGATATTAAACAGGTAGAGGTGACTACCGAAGAGCCCGATGACGATCAGAC
GCCACTGGAAGCACTGTTCGAACAGTGCAAGATAGTGGCGGATCAAATTCAGGCAAAGAG
AGACCCTAGGCATGCTGGTGAGCTTGAAAAATTCAAGTACATCACCTTCATCGCCAGGGA
ATATGCGATAGAAGTTGAGGAGAAATGTAAGGCGCTTGGAGAAGCCGAAAGGCGTATCCA
AGCCCTTACAGAGGAAAAAGACACTGAGTTGTCAGAGATGAAGAAGAAGCTTGATGACGC
CGAAAGGCGCATACAAGCACTTGAGAAAGAAAA
>LINE_comp3541_g1_i1
CGCCCCCGAAGTCGAGCCCCAGAATGATTGTGCACAACGTACCGCGGACCGAAAACGACC
GATCCCTGATCGAGGCGATCGTCGAGCAAAACTTCAAGGGTAAGGACAAGGCCGTCGTTA
GGGAGCAAACGAAGGTCTCCTTCAAATCAGGACCCAAGGACAAGGACACCTGCAATGTCA
TCTTCGAGGTGTCAAATAAAGTCCGGGAACTGATAAAGAACAAGGGCCTCCTCTACATCG
GCTGGGAACATTGCCGCGCGAGGGACTACATTGTAGCCACGCGCTGCTATAAATGCCAAT
CCTTCGGGCACACGACCAAATACTGCCAAGCCCCTAAAGAAATTTGCGGATACTGTGCCG
CCGAAGGACACTCCTTCAAGGAGTGTCCTAACAAAACGAAATCCCCTGTTTGCTCCAACT
GCCGGAAGGCCGGCAAGGAGCACAAGGACTCCGTTAAGCTGGAACAATGCCCAGCGCATA
AAGCGGCACTAGAGCGGGTCCTTCAACAAACCGACTATGAATAACGCCCATAGTCGTACC
CACAGCCAGACCCTGAAACTGGCGCAATTAAATATGCGCGGATCCCAAACCGTCTCCCTC
GAAATGTCCCGCATTATGGGGGAGAAGAATATCGACATCCTGCTCATGCAGGAGCCGTAC
AACGTGAAGGGCAAATTCATCGGCCTCACGAATTGCACGGCAGTCACGGGCGCGGAGCCT
GGCAACCGAGCCATGGCTGGTATCGCGATACGCAATCCCAACCTCGAGTCCCTTAAGCTG
TCGCATCTCAGCGACGACTATTGTACGTGCATCGAGGTAACAGGACCATTTGGGAAACTG
TACCTCGCTAGCGTATATTTCAAATTCTCGCACGATATCGAAAGATATCTGGCGAGAATC
TCGCAAATATGCCGCTCCCTCCGCGGACAGAGATTAATAATCGCTGCCGATGCCAACGCG
AAGTCCTCGATTTGGCACAGCACCACAACCGATCCGCGAGGCGAAGAATTGGAATGGGTT
GTAGCCCAGGAAAATCTAGTAGTCCTCAACGAACCCGGTAACGCCCCCACATTCCGCAAC
CATAAAGGATCCTCCAACGTAGATGTAACGCTGTCAAGCCTTCCGACCGTCGGGTTCATA
GGAAGCTGGAAGGTCCATGAAAATTGGACATCCAGCGACCACAACGCAATTACCTTCACG
TACAAGGCCCCCACCACAATGGGACCCGCCTCCGCGAGCCCCAGATTCAATACATCCAGG
GCCGATTGGGCTAAATTCCAATCGAACCTGGAAATAATCAAAAGCAGCCTCCTCCGCGAT
TCCCGGCTGGACAGCAAATCTGCAATTGAGGCCTCAGCTGCGTCTCTTCAAGACGCAATC
ATTACGGCTGCGCAAAAATCCCTTCCGAGGAAGAAAACTTTCCCGAAGTCGGTTCCCTGG
TGGACGGAAAACCTGACCCGGCTAAAGAAGAAAACTTACCGCATGCGGAAGTCCTTCCAG
GTCGAGTCGGACCCTTCCATCAGGGAAGCGAAACGCGTCGCGTACCTCCAGATTCGCAGG
AAGTATTCCTACGAAATTCAGACCGCCAAGCGATCAAGCTGGCGGGACTTCGTAACGGAA
TCCTGCGCGAAAAACCCATGGGGAGCGGCGTATAAAATTTGCGTCAAAAAGATCAGCCCC
GATAAAGCCCTGGCCACTTCCCCGGTTCTGTCCGGTTCCACAATTACGTGGGAGGAGACC
GCGTTAAGCCTCCTCCACGCCCTTGTTCCCGACGACGCCCCGGACACGCTCGAGTGTCAA
CGTCGTAAAAGGTCCGCGAGCGTAACCCCCCCGGATACCCCAGATACTCCACCCTTCTCG
GAACAGGAAATTTGCCATGCAATCGGCTCGATTCGCAATGGCAAAGCTCCAGGTTCCGAC
CTTATCGAGGTCAGAATGCTTAAGGCCGCTTATCCGGTCCTAATAAGCGAAATCTCAGCC
CTCTTCAACGGCTGCCTGTCACAAGGCAGCTTCCCGAAGCCATGGAAATATGGCTCGATA
CGCGCCCTCCTCAAAAGCCCCGATAGGGACGAGTCCGCGGCCAGCTCCTACAGGCCCATC
TGCCTTCTCTCGGTGGTTGGGAAATCCCTGGAGAAGCTGATCCGCGAAAGGCTGGAGCCC
ATTTTTCTCCACCCCGGCTATGCTTCCCCTAGGCAGTTCGGCTTCCGAAAGGGAAGGTCG
ACGACTGACGCCATCCGCGCCGTCCGCAGCGGGCTCGAGGGGTCAACGACAAAATACGCG
CTTGCGATTTTGTTCGACATCTCGGGCGCGTTCGACAACGTATGGTGGCCCAGCGTCCTC
TTTCGCCTCAAGGAGCGGAACTGCCCGCGAAACCTATATAGACTCGTCGCGGATTATCTC
AACGACCGTACGGCCTCACTGATAGGGAAATTGACCCGTGTCGAGAAACAGGTAACCAGA
GGCTGTCCTCAGGGCTCAATCTTAGGGCCCAGCCTCTGGAACCTTGTGTTCGATAGCCTG
CTGATCACCCTGGCCAACGAGGGCGTAGAGGCGTTCGCCTACGCGGACGACCTCCTTATC
CTCGTCCCAGGAAACAGCAGGCTCGAGTTGCAGGAAAAGGGACAGCACGCGACAACCATC
ATTGAGAAATGGTGCGAGTCCGAGAAGCTGACCCTTTCACAGGAAAAAGCAGAGATGATC
CTCTTCCGTGGTCATCTCGATATTCGAAGGCCCCCAACAATTAAGATTCAATCGAGGCAA
ATACGTATGGTCGAAACCGTAAAATATCTCGGCGTCTACCTCGATCAAGGCCTGAGGATC
CGGACGCACGCCCGGAAAATCAGGTCGAAGTGCGCCGAGAAATATAACTCCATGGCCGCC
ATAGCCCGCAGGAACTGGGGACTCAAATACGAGTCCCTAGATGTTCTATACAAGGGACTT
TTCCTGCCAATCGCCACGTACGCCGCCCCCGCGTGGAGCGACCTGGTAAATAAGACCTCC
GCCTCAGAACTCCTAAGGGCGCAAAGGTACGCTCTCCTGCGTACCACCAAAGCCTATAGG
ACAGTATCTACCGACGCTCTACACATAATCGCTGGTGCTCCTCCGGTTGACCTCGTTATC
AGACGAGCGGCAGCCCTGTATGATGCGCGAACTCCCGCCCCCGCAGCGGGCGGCGCTGTG
GAGGACCCCGTCGAGGAACAAGCCTCCGAGTCCCTGCTTAGCGTATGGCAGGAGCGCTGG
GATGACTCTGCCCATGGCAGATACACCCACCGCTTCCTGCCGTGCGTGAGGCAGCGGATG
AGCATGGGATGGTTCTCTTTGAACCATTACATATCCCAGATCATCTCGGGACACGGTGAC
TTCGCGGACAAACTCCACAGCAGAGGGCTAGCCGATAGCCCCCGCTGCCGCTGCGGTGCC
CCCAACGAGACACCCAGCCACCTGTTATTCGAATGCCCTCTGTATAACGCAGAACGCGAG
CCCCTCCGGAACGCCATGCGGACCAGCGGGAACCTGGATTGGCCCCCACCCCCACCGGAC
CTGATTAGGGAATCGATCTTCCCGGCACTGGCACAAACCGCGCGCGACATCCTCCGCGCG
AAGGAAAAGGTCCGGGAAGATCGCCCTCCACGCCGCGATCACTCCGCGAGACCATCCCGA
GAACGCGATCCCACCCCGCGAAACCGCGAAAACCGCGACCCCCGCAAAAACGGCGAAAAC
CGTGAAAACCGCGAAAAACCGCGAAAAACCGCGAAACCCGCGACCCACCCCCACCCACCC
GCGAAAAACCGCGAAAAACCGCGAAACCCGCGACCCACCCCCACCCAC
>LINE_comp3541_g5_i1
GTTTTTTTAATCGAATCCGTGGACGTGTGTATGCCGTAGCGTCGCTCGTCGTGTTCGTTC
ATGGTCGTTCCGAGAGAAAGAACGAAAGCGGTAACGAAGGGACCGGCCGTGAAGCTCGTT
TTAAAGCCGTGCGTCTGACACCCAACTCTTGCGCGCCAATTTCGCGGCAAGAGATAACAT
GGGACGAATGACCGGCAAAGAGCCAGCTGTGAAGTCTTTTTTCATTATTTGCTTTCAATC
GATCGATCGGTACGATTCGTGCAACGTTTCGCGCGATGCGACGCGAAAACATGCGCGCAA
CAATAGATGCGTCTGATCGGAAGAACGCGAGGGTCGACTGCACGCGATGGATTCAGTATC
GGGTAGGATACAAAATATATCCCCGTCGTTTCCACGCGTGCGAGTCTTCTGCGTCTTTCG
CGGGTTTTTGAATGCACTATACGCCCGGAACGTCGAGAAATATATACATATTACTTGAAC
GTTTTTCGTCTCGAAAGGCTTCGGTGTCGTCTCCAAGGCGACGCCTGAATCTCCTTCGCG
CGCTGGTCGGAGATTCAGGTATCAACTTTTATCTTCTCTTTGAAAGAAGAGAGATATTAG
GTCGAACAAATGAGAATAAAATTATATATGTGAAATATAAAATTTATACGATTACCCTGA
ACGGTGGATCACTTGGCTCGTGGGTCGATGAAGAACGCAGCTAATTGCGCGTCAACGTGT
GAACTGCAGGACACATGAACATCGACATTTCGAACGCACATTGCGGTCCACGGATACAAT
TCCTGGACCACGCCTGGCTGAGGGTCGTTTACGTACCATACACTGCTTGCGTAGCTCTGT
CAAATCCCCGCCGTCGTTCACCTCTTCGGATCGAACGTTTTTTTACCGAAGGGCGCAAAG
AACGTTTCTGAGTCGGGTTAAGAGAAGGATGCTACGTACGAGCGAACGATGGGTGTCTCG
TCGGCGTTTGTCGCGGACACGCGAAAATTCTGTGAATTTCACGGACAGTGTACGTTCTAG
TTGTTGCAAAACGATCGGAATCGTTTGTATGGACTCGCGTGAGTGTTCGCGGCGTCGTGC
GTCGTTCAATTACGACCGCCCGCGGATACCGCTCCACTGCGATATGGATCTGAGCGACAA
CTTTTTCGGCTGTTCGTGAGATGAACGGTTTCGTGTGTTTAGAAAAATTTTTTTTCCCGC
GCTCCCGACGTCACCTGAAATGATGCGTCAGAGGTGAAAGAAAATATTAAGAAGTCGAGA
GAGAGAGAGACTACACACGTTTTATTCATATTTTGTATACCGTGCGTGAGACGGATGTGC
ACGACACGTCGTATGTCGGTATATTACCGACTGGCCCCAGGGAGATTGTTTTCTTCCTCT
CTTACGAATGAGATGTACGTTTCGGAGGATCGTCGTTACCGAAACACACGGCAAAACGAG
ACTTCTCGCAGCAGAACCTTTATACACAATACACATCGACTCTTTTTACCCCGAGAGAGA
GAGAAAAGGTGTATTTCTTTTTTTTATTTTTCGAATTCGACGCACGAACGCTTTGACGAC
TGGAGAAAAACACGGTGTGTGTTAAAATCGTGCGGGACGAGCATGCGTATTCGTAACGGG
TCGAATAGTTCTTATTCCCCGTCGTCGCGTGTCCTCGCTGGACCACCACCGTGCGCTTCC
GCCACGTTCAGTTGAATTTCGAAATATATATATATAAAAAGAATCACCATATACTCTCTT
TCGGGAGGTGTATTTTTATCGGTTTCTGCTATAGAGAAGAGACGGACGATCGTGTGTGAC
ACCACGTGGTAACGTTTCCGTATCCCCGTAAAATACGTTTATCTTTTCTCGTAGAAAAGA
GAGAGGAAGAGGCAGGAGCTCCTCTTTGGCGAGGCTTTCGAACGTCGCGTCCCGTCCGCC
GGAATATAATGATATAAATATATAACCGCCGCCGACTTTGTGCGAAAGCGTTGAAACGAA
CGCGTCGGTCGCCCCATGGTGTGTGTTTGTCGTGTCTTCTTTTCCTCTTCTGCACTTCTC
TTCACTGTCGATCGCGAGACCGCGCGAGATCCGCTTCGGTCGTCCAGTCCCCGAAAATTC
TTCTCGGACGGGCGTTAAAGTTAACCGGAGCGCGAGATCGTCTAGCGAGAGTCTTTTTCG
CGATCGAGTAAAATGTGATAGAAGAAGGAGAAGAGTGTAAAAAGAGAATATAGACACGCG
ACGCAGCAGAGACCACTGGTGAGGCGCATAAGACGCGTTCGCGAACGATTTTTCGCGACG
ATACGGAGTCGCGCGTGTCGCGGTATATTTATCATTTATATACGTTATAATATGAATATT
GTTGTGTTCGAACGCACTCTCCTCTAGACTTTGTTTTTTTTGCCTTTGAGCGATTTTTAT
GAAATTCGATTGAATTTTCATACAATTCACGTTCACGACGACCTCAGAGTAGGCGAGATT
ACCCGCTGAATTTAAGCATATTACTAAGCGGAGGAAAAGAAACTAACAAGGATTTCCTTA
GTAGCTGCGAGCGAACAGGAATTAGCCCAGCACTGAATCCCGCGGTTCCGCCGTAGGGAA
ATGTAGTGTTCAGGAGGGTCCATTTATCCCGTGACGTCGAACCGCGTCCAAGTCCATCTT
GAATGGGGCCATTTACCCGTAGAGGGTGCCAGGCCCGTAGCGACCGGTACGCGTTTCGGG
AGGACCTTTCCTTAGAGTCGGGTTGCTTGAGAGTGCAGCCCTAAGTGGGTGGTAAACTCC
ATCTAAGGCTAAATATGACCACGAGACCGATAGCGAACAAGTACCGTGAGGGAAAGTTGA
AAAGAACTTTGAAGAGAGAGTTCAAGAGTACGTGAAACCGTTCAGGGGTAAACCTGAGAA
ACCCAAAAGATCGAATGGGGAGATTCATCGTCGACGAGGCTGGCTTCCGTTGGCGCGCAG
ATACCCCGCGTATGGACCTTCGTGGTTCCAATGCGCGAGGGTACACCGCCTTCGGCCTAA
ATGTTCCGGCAACGTAGTCGTGCACTTCTCCCTTAGTAGAACGTCGCGACCCGTTGCGTG
TCGGTCTACGGCCCGAGTGGTTGCCTGCCGCGTCGCCTTTGGCGCACGCGACAGACCCTC
GGCGGCCCGGCCGGCTGCGCGACGGTACTCTGACGGTATCGGGCCGCAACCAATCCATTT
TCGAATGTATGTGCGTCAGGCCCGCCGCAAGCTCGATCAGTATACCCTCGGAGGTACGGA
CCTGGTGCCGGCTCCGAGCCTGGTCAGCTGTTGGCAGGCGGTGTCCTCGGACTGGCCAAG
CTTCGAATTACCGGTCGGCGACGCTACTGCTTTGGGTACTCTCAGGACCCGTCTTGAAAC
ACGGACCAAGGAGTCTAACATGTGCGCGAGTCATTGGGATTTTGTAAACCTAAAGGCGGA
ATGAAAGTGAAGGTCGTTCCTTAGCGTCGACCGAGGGAGGATGGGCCGCGTTGCGATGCG
GCCTCGCACTCCCGGGGCGTCTCGTTCTCATTGCGAGAAGAGGCGCACCCAGAGCGTACA
CGTTGGGACCCGAAAGATGGTGAACTATGCCTGGTCAGGACGAAGTCAGGGGAAACCCTG
ATGGAGGTCCGTAGCGATTCTGACGTGCAAATCGATCGTCGGAACTGGGTATAGGGGCGA
AAGACTAATCGAACCATCTAGTAGCTGGTTCCCTCCGAAGTTTCCCTCAGGATAGCTGGC
ACTCGCTTGTTCCTCCGTGAACTTGTGCGAGTTTCATCTGGTAAAGCGAATGATTAGAGG
CCTTGGGGCCGAAACGACCTCAACCTATTCTCAAACTTTAAATGGGTGAGATCTCTGGCT
TGCTTGGATCAATGAAGCCACGAGATTTATGAATCAGAGTGCCAAGTGGGCCAATTTTGG
TAAGCAGAACTGGCGCTGTGGGATGAACCAAACGCAGAGTTAAGGCGCCTAAGTCGACGC
TTATGGGATACCATGAAAGGCGTTGGTTGCTTAAGACAGCAGGACGGTGGCCATGGAAGT
CGGAATCCGCTAAGGAGTGTGTAACAACTCACCTGCCGAAGCAACTAGCCCTGAAAATGG
ATGGCGCTGAAGCGTCGCGCCTATACTCCGCCGTCAGCGGCAAATGGGGCGGGATTCTTC
CTTTACGGGTCGAATCCTCCATGAAGCTCTGACGAGTAGGAGGGTCGCGGCGGTGTGCGC
AGAAGGGTCTGGGCGTGAGCCTGCCTGGAGCCGCCGTCGGTGCAGATCTTGGTGGTAGTA
GCAAATACTCCAGCGAGGCCCTGGAGGACTGACGTGGAGAAGGGTTTCGTGTGAACAGCC
GTTGCACACGAGTCAGTCGATCCTAAGCCCTAAGAGAAATCCTATGTAGATGAGGTGTTT
TTTTATTTTATACACGATCAATACGAGAGAGAGAGACAAAAAGTACACACCCATCGGGCG
AAAGGGAATCCGGTTTCTATTCCGGAACCCGGCAGCGGAACCGCATACCATTCGGGCCCT
CGTAAGAGTGTTCGTCGGGGTAACCCAAAATGACCTGGAGACGCCGTCGGGAGATCCGGG
GAGAGTTTTCTTTTCTGTATAAGCGTTCGAGTTCCCTGGAAACCTCTAGCAGGGAGATAG
GGTTTGGAACGCGAAGAGCACCGCAGTTGCGGCGGTGTCCGGATCTTCCCCTCGGACCTT
GAAAATCCAGGAGAGGGCCACGTGGAGGTGTCGCGCCGGTTCGTACCCATATCCGCAGCA
GGTCTCCAAGGTAAAGAGCCTCTAGTCGATAGATTAATGTAGGTAAGGGAAGTCGGCAAA
TTGGATCCGTAACTTCGGAATAAGGATTGGCTCTGAGGAGCGGGGCGTGTCGGGCTTGGT
CGGGAAGCGGGTCTGGCTGACGTGCCGGGCCTGGGCGAGGTGAACATGTACGGCAACGTG
CAGGGATCCGAGCTCGGTCCCGAGCCTTGGCCTCCCGCGGATCTTCCTTGCTGCGAGGCT
TTCGCGTAGCGTTCGTCCTCTTCGGCCGCCATTCAACGCTCAGCTCAGAACTGGCACGGA
CTAGGGGAATCCGACTGTCTAATTAAAACAAAGCATTGCGATGGCCCCCGCGGGTGTTGA
CGCAATGTGATTTCTGCCCAGTGCTCTGAATGTCAACGTGAAGAAATTCAAAAAAGCGCG
GGTAAACGGCGGGAGTAACTATGACTCTCTTAAGGTAGCCAAATGCCTCGTCATCTAATT
AGTGACGCGCATGAATGGATTAACGAGATTCCCTCTGTCCCTATCTACTTGCCCCAGGGG
CCGTGTGGCGATCACGGTTCGGGGAGTGGCGCCCCCGGGCTCCTTAGCTAGGGTCTAACC
AACCCTTGGTGTGGACGAGACACCTTGATATGGCAGGCACAGCTTATTCATGTATGTAAG
AAGCCGAACAGGTCCTACCAATAGACCTGCGATTGGATTGGTACTACGGGCGCTCCGGTT
GCCCATGAGGGCGTACGAAGGGTGCCTAGTCCCCTTGTCCCCTCACAGAGAGTGACCATG
GGTGCTTGTCCCCGGGTCCTCTCGGCCGGTGCAATTGGTGTTGGATTCGTAGTGGCAGTG
GTTGCAGCCTACATGCTGGGCAGAGACCTTTCGAGGGTCTCGGCGCGTGAGCAGCGTCCC
ACCTGCTCCTGGACCAGACAGGAAATCTGGTAGAGTTTTTGGAAAGGTAACTCGGCGCTA
CCAACAGTCTACTTCCATGGGACTCGTCATCCCCGGGAAGCAACGCTGGTAAGGCTTCGG
CCTCAGCTGACTGAGCTTAATCTCAGTCCCACGCCCATGGGGGCCCTCCTTGGTAGGCCT
TAACGGCAGGTACTTGGAGGATAATCTGGGTTCCCTCTGTCCCTATCTACTGGAGTTCAC
CGCTAGGAGGCGCAGAATACAGACGCGTGTTCACGTCGCTCCGTGTTTCGAGGCCCAAAA
AAGTGGTAAACGTCGAGGAGAAATCCATTTTCGAAGTATAAACGCGAAGTGCAAGTGATT
CCGGGCATTCTGTGCTAAGAATCGTGAAATTCGGTCAGCGAGGGCCGAATTTATCGAGGA
AATAAAGTTAGCGTCGGTTGGTGACGTCATCTGGCGTCACCTGAAATTTCGAAGTCTCGT
TCCCGTCTTAATAACCGCGGGATCGTAGAATCGCCGCGGCCAGTGGCGTAAATAAAACAT
TCGGACACAGTGTTGTGATAATCTCTAGTGAATTGTCGCAAATTAAGGATATTCATCGAT
ATATATCCCGGTATCAACGACAACAGATTTGTCGACGCCATCTTGGACGCCATATTGGCG
GCCATATTGGCGGCCATATTCTGACGTCACACGCCGCCAGCAGCTCCCCTCAGCGTCGAC
GACGGAGCCGCCAGCAAACAGTCCTCGCCGCAGCAGCGCCGCCATCGGCCAAATAGCGAA
GCAGCCAGTCGAGCCCCATCCGCCACGCCGTCAACTTCGACCGCGAGGCGAGATGCTGGG
AGCGTCGAGAAAGCGACCGGCTGATGAAAGGTCGGAGTCGGATTACTCCGACGCCGGCGG
CGAATCGAGCCCCTACTTCAGCTCCGAGGAAACGGAAGAGCTCGACAGCCCCATCAGGGA
TGTGTACAAGGCAGGCAAGGCAGGAACGGAGTGGACAACCGTCCGCACCAAAAAGAAGCG
CAAGACGAAGCCGAAGGCTGCAAAGCAGCTGAAAATGGAGAAACCCACCGAGGTCCCACC
AGCAACGGAGCCCGCCCCAAAACCAGAGGAGACTGCAGCGAGGGGGAAGGCTTCACCCAC
GAGAAAGGAGGTGCCCCCGCAGAGTGACAGACCCAGATCCACCGAGGCAGCAGTGGGTAA
GTCCAAGCATCTGAACCAAATTATTATGGAGAGCATCGCCACGAAAATCGAGGCCGACAA
TCGCGTAAAGGCAGCGATAATCAACGCGGTAACGGAGCTGACCCAGCTACTAAACCAGGC
GCTCGTTGATAAGAGCAATCTCGAAGGCCAAATAAAGGCCCTCAAATCCGCGGTTCTCTC
CCGCGCTACCGCCCCCACAACCCACCATACCGCGACACGCGCCCCCCCCACCGCGGCCCC
ACGGTCCCCCAGATTGGCCCCCACCCCCCCCACGGCGACAAACAACAAACCCGTGGCACA
ACGGGAAATGACCTGGGCGGAAAAGGCCCGAATCCCTAAACGGATAATATCGATCGCGAA
CCCAAAACGCGATCAACCGAATATAATAAAAATCGCCCCGAGCGACTCCAAAACGTACGC
CGACTCAGCGGCAACGCGGAAAGCCGTCCTGGAGATGGTCTCCCCGGAGGCCAGCAAGCT
TCAGGTCCGAAGCGTCCGTCTCCTTCAGGGGAACGGTATAATTATCGAGGCCGCAAAGGG
ATGCGACCTCTCGACCCTCTCCACCCACCCAAAGCTTAAATCGGACGGTTTCACGG
>LINE_comp3544_g1_i1
CGTGTGCTCTTCCGATCTCCTCGCCCGGTGCCAGGAAGCCCGCTAAGCTCCTTAGCGGAC
TTTGGTCTCCAGTCTCGCCGCTGGAGATCCGCAAAGCCATGCCGCCAGTCGGCACGGCTC
CTGGTCCGGACGGCCTGTCTGCCAGGGACTTGAGGGCTGTCCCGCAGGAGATACTCACTC
GCGTGGTCAATCTTCTTTTACTTGCCGGGCGATTGCCCGCGCATCTTATGGAATCACGCA
CGACCTTGATTCCGAAGAAAGACAACGCGACTCAGCCATCTGAGTTTCGACCCATCACGG
TGTCATCGGTCCTTGTCAGAACCTTTCACAAGGTTCTGGCAAATAGAATGCTCCAACTGA
TTCCCTTGGACAAAAGGCAGAAAGCCTTCCGACCGATTGATGGGTGCAGTGAGAATATCT
TCCTGCTTGATTTTTTACTATCGTATGGCAGACAGAAGCATAAGGATATCTTTATGGCCT
CCTTAGATGTCGAGAAAGCCTTTGACTCCGTGTCTCACAATGCCATCAACGACACTCTGC
TAAGCGCAGGAGTACCGCCGCGGATGGTCGAGTATATTATGAGTACATACAGAGGTGCTG
TTACGCGTCTCGCGTGTCAAGACTGGCTCTCCCGCCCTATACGTCCGGGGCGCGGAGTTA
AACAAGGTGACCCTCTGTCACCAATGATCTTCAACCTGATCATTAACGATCTGTTCGCCA
AGCTGCCCAAAGAGGTAGGCATACAACTAGGCGACATGTCAGTCAACGCAATGGGATTCG
CGGACGATCTCATACTCATAGCAACCACTACAGCCGGGTTGCAAGAATTGCTCGATACAT
CCGCCGAACACCTATCAAAATGCGGACTCAGTGTCAATGCGGCAAAGTGTTTCACGGTCA
GTCTGAGGGGAAACGCTAAGGCTAAAAAGACGAGTATCGATGCCGACCAGGTCTTCACCT
GCTCTGGTCGACAAGTACCGCCTTTGAAGCGATCTGACGAGTGGAAGTACCTCGGCGTCC
CATTTACCCCAGAGGGCAGGGTAATAGGCGAGCCCTTGGCGAAGCTAAGGGCCGACCTAG
AGGGGTTGACCAAGGCACCCCTCAAGCCACAGCAGAGGCTGTTTGCTTTAAGGACTGTCG
TACTTCCAGGACTATTCCACCAACTTGTCCTAGGCCGAACGACTTTAAGCCTACTCCGAA
AGATCGATGCAGTCACGAGACTGTTTGTGCGAAGGTGGCTTGCCCTCCCGCACGATACGC
CGAACGCGTACTTCCATGCCGACTCTAAGGACGGCGGACTGTCGCTCCCGACGTTCAGAT
GGAGCATACCGCTCCAGAGGCTACACCGTCTGCAGAGCCTCAAGGTACACGAAGGGGCCG
TGATACCGAGCAGCATCCAAGCGTTCTTGGATGGAGAAATTCGCCGAACTGAGCTTCGCC
TCAATGATCAGGGGCAAGCTATGACCACCAAGTCGGCTTATAGGAAGCGCCTCGCAGAGC
GTCTTCACGTATCAAACGATGGTCGCCCCTTGACAAGATCTGGCGACGTCACAAACCAAC
ATAGTTGGGTGACCGACGGGACCACCTTCGTCTCAGGGAAGGATTACGTGAAGATGCACA
TGCTTCGCATCAACGCTGTTCCGCTAAGAGTGCGGACAGCAAGAGGCAGGATAGGAGACC
GCCATTGCCGAGCAGGTTGCCACGACGCAGAAACACTTCATCATGTTCTGCAACTCTGCC
ATCGGACGCACGGCCCTCGCATCAAGCGGCACGATGCCTGCATCGACTACATGTGCAAGC
ACATCGATGCAGGTTATACAGTTCACAGAGAACCCATATTTCAAACGTCCACCGGAAGAC
TTAAGCCTGATGTAGTGCTGTTAAAAGACCAAACAGCCATAGTTGTAGACGCTCAAGTCG
TCGGCGAAAACGCCGACTTGGAAAAGGCACATCAGGCTAAGATCTCCAAGTATGAGGGGT
TAAGGGAGCCCATACTCACGAGGTACTCTGTGAACGAAGTGTCATTTACATCTTTGACAC
TGTCCGCGCGAGGGATATGGGGACGTCGATCCTTTGAGCAGTTGGTCGGATTGAACCTCC
TAAAGCGTGCGGCCGCCAAGATAATCTCTACCAGAGTTTTGATTGGCGGTTTGCACGCTC
TTAACATCTTCAATAAGTCCACTGGCGTGAAGAGGGGAAGCTCACGGTAGGCTGGCACTC
CCGTCTGTTGCGAGGTTTACTGTGCTGCCTGCAGTCTCAGGCACAAAGTAGGAGTTTAGG
TTTAGTGGGTATTCTGCAAGTGTTCGCAGCGAGTCCCACACTCCCGGTCGACAACCATCT
AGACCGGGGCTCAGTGCGTAAATGCATTATCCCTTTTTCTCCTATCAAAAAAAAAAAAAA
AAAAAAAAA
>LINE_comp3544_g1_i2
GGGAGTAACTATGACTCTCTTAAGAGGCGGTCGTTATGAGGTGTCGGACCAGCCTTCGGG
CTGGCACTAGTATCCCAGACCAGCCTCTCATGGGCTGCGGCGAGTGCCGGCAGTGTGTCG
CAAATGGAACAAAGCAGAACATCCAGGCTTCAGCGACGACACGGCGTCGCTTCAGCGACG
ACACGGCGTCGCTCCTTCTACTACGGTAGAAGGAACGCATAACATCAAAGCAATTAGCGG
CGCTTCGGCGTCGCTTATTTTTTTTATGCCATTTTTAAAAGCAACACGCGGCGGGGACTT
GGCCGGTGGTGCTGTTGCTTTAATACGCCGTCGGGGACGACAAGGCAAGAAACGGCGCTA
CGGCGTCGTTTCTTTTTTTTATGCCTTTTTTTCAAAACAAACACGCCGCTGGTACTTGTA
TCGGTGGGGTTCCCTGCCCTACCAGTGCCTGTGCCGGCGGGAGTGTCAAAAATGTGTCAG
CCGCACACCTGGCTTATCCCCTGGCCGGACGGCCCCGCTAGCTTTACTCGGTGTCAGAAA
GCACCATGCCGCCAATACTTGTATCGGTTGGTATGTTGTGATTACACCGTCCCATATCGC
CGGGGGACGAGTAAAGATAGATAGGGACATAATGTCATGTAAACCTTGACAAAAGCAACA
CGCCGCTAATACTTGTCCTCTGCCGTGATGTTGCTCAAAATCGTCCACCTATGCATATAG
CTACGCTACGGCGCTGCTCAGATTTCACGAAGCCCATTCCATGCGGGGCACTGTCGGCGC
TTCGTTGCATCGAGGCTTAGTTTAGCAAGCGACCGCCTGCACGAGGCTCCCGCTGCAGTT
CTCTTCGGAGTTCGCTGAGAGTCGCCTCTGCGCCCAACGCGCCTGGGGGCTGCCTCCCCC
CTTGCGCGGCTCTAACTGGCCCAAAGCATAAAACACAGCCTCGGATGAAAAATGTCGGCG
AGCCCACTGGCTCCGCCGACCCAGTTAGCGACTCGCAACAGGGCGGTGAGAGGTTGGCCT
CCGGAGTGAGGACCTTTCACTGCCAATATGCGGACTGTGGCCGATTCTTTAAGACCAAGA
TCGGCCTGGGGGTTCACCAACAGAAGGCTCACAAGGACTGGTACGACAAAAACCAGCTTG
TGGAGCAGTCCTCCAAAGAACTGACAAGGACTAGGTGGAACCCTGAGGAGTCCGCTCTGT
TGGCGAGGCAAGAGGCAAAGCTTCTTTTGGAGGGAGTCAAGTTCCTCAACCAAGAGTTGG
CCAAGGTCTTCACGGACCGGACCTTGGAATCTATTAAAGGACAACGACGCAAAGCTGAGC
ACAAGTCTCTTGTGTCTCAGCTTCTGAAGGAGGTCGTCACAGCTCGGGACGAACATCAGC
CTGAGCCTGTGTTTCAGACCCCTTGCCCGTATGTGTCAAGTCCCGCCACGGCTCCGACTC
GCACTCTAAGTGAGCACTCGAACGACGAGTCGGATGCCCAGGTGTTAGATTACTTGACTT
CCCTGCCACCGATTAAGACCGACAAGTTCGACGCCAAGCGACTCGAAAACCTTTGTCGCT
CAGCTGGGGCGGTATCCCCAAATCACATCCTGGAAGAGCTCACGTTGTACCTCTTGAAGG
CCTTTCCGAATAAGCCACGGAAGGAACGTGCAGCCAAAGGGTCTAAACAGCCGGACCCTA
AGATTTCCAAAAGACGTGCTCGAAGAGCAGAGTACGCCAAAATCCAGAAGATGTGGGGGA
AAAACCGCTCCGGCTGTCTAAGAACGCTGCTGCGGGATAAACAAACATCCAATATCCCGT
CCCTCATGGCGTCGA
>LINE_comp3544_g1_i3
GGGAGTAACTATGACTCTCTTAAGAGGCGGTCGTTATGAGGTGTCGGACCAGCCTTCGGG
CTGGCACTAGTATCCCAGACCAGCCTCTCATGGGCTGCGGCGAGTGCCGGCAGTGTGTCG
CAAATGGAACAAAGCAGAACATCCAGGCTTCAGCGACGACACGGCGTCGCTTCAGCGACG
ACACGGCGTCGCTCCTTCTACTACGGTAGAAGGAACGCATAACATCAAAGCAATTAGCGG
CGCTTCGGCGTCGCTTATTTTTTTTATGCCATTTTTAAAAGCAACACGCGGCGGGGACTT
GGCCGGTGGTGCTGTTGCTTTAATACGCCGTCGGGGACGACAAGGCAAGAAACGGCGCTA
CGGCGTCGTTTCTTTTTTTTATGCCTTTTTTTCAAAACAAACACGCCGCTGGTACTTGTA
TCGGTGGGGTTCCCTGCCCTACCAGTGCCTGTGCCGGCGGGAGTGTCAAAAATGTGTCAG
CCGCACACCTGGCTTATCCCCTGGCCGGACGGCCCCGCTAGCTTTACTCGGTGTCAGAAA
GCACCATGCCGCCAATACTTGTATCGGTTGGTATGTTGTGATTACACCGTCCCATATCGC
CGGGGGACGAGTAAAGATAGATAGGGACATAATGTCATGTAAACCTTGACAAAAGCAACA
CGCCGCTAATACTTGTCCTCTGCCGTGATGTTGCTCAAAATCGTCCACCTATGCATATAG
CTACGCTACGGCGCTGCTCAGATTTCACGAAGCCCATTCCATGCGGGGCACTGTCGGCGC
TTCGTTGCATCGAGGCTTAGTTTAGCAAGCGACCGCCTGCACGAGGCTCCCGCTGCAGTT
CTCTTCGGAGTTCGCTGAGAGTCGCCTCTGCGCCCAACGCGCCTGGGGGCTGCCTCCCCC
CTTGCGCGGCTCTAACTGGCCCAAAGCATAAAACACAGCCTCGGATGAAAAATGTCGGCG
AGCCCACTGGCTCCGCCGACCCAGTTAGCGACTCGCAACAGGGCGGTGAGAGGTTGGCCT
CCGGAGTGAGGACCTTTCACTGCCAATATGCGGACTGTGGCCGATTCTTTAAGACCAAGA
TCGGCCTGGGGGTTCACCAACAGAAGGCTCACAAGGACTGGTACGACAAAAACCAGCTTG
TGGAGCAGTCCTCCAAAGAACTGACAAGGACTAGGTGGAACCCTGAGGAGTCCGCTCTGT
TGGCGAGGCAAGAGGCAAAGCTTCTTTTGGAGGGAGTCAAGTTCCTCAACCAAGAGTTGG
CCAAGGTCTTCACGGACCGGACCTTGGAATCTATTAAAGGACAACGACGCAAAGCTGAGC
ACAAGTCTCTTGTGTCTCAGCTTCTGAAGGAGGTCGTCACAGCTCGGGACGAACACCCGC
CTGAGCGTGCGTTTCAGACCCCTAAGTGAGCACTTGAACGACAAGTCGGATGCCCTGGTG
TTAGATT
>LINE_comp3544_g1_i4
CGTGTGCTCTTCCGATCTCCTCGCCCGGTGCCAGGAAGCCCGCTAAGCTCCTTAGCGGAC
TTTGGTCTCCAGTCTCGCCGCTGGAGATCCGCAAAGCCATGCCGCCAGTCGGCACGGCTC
CTGGTCCGGACGGCCTGTCTGCCAGGGACTTGAGGGCTGTCCCGCAGGAGATACTCACTC
GCGTGGTCAATCTTCTTTTACTTGCCGGGCGATTGCCCGCGCATCTTATGGAATCACGCA
CGACCTTGATTCCGAAGAAAGACAACGCGACTCAGCCATCTGAGTTTCGACCCATCACGG
TGTCATCGGTCCTTGTCAGAACCTTTCACAAGGTTCTGGCAAATAGAATGCTCCAACTGA
TTCCCTTGGACAAAAGGCAGAAAGCCTTCCGACCGATTGATGGGTGCAGTGAGAATATCT
TCCTGCTTGATTTTTTACTATCGTATGGCAGACAGAAGCATAAGGATATCTTTATGGCCT
CCTTAGATGTCGAGAAAGCCTTTGACTCCGTGTCTCACAATGCCATCAACGACACTCTGC
TAAGCGCAGGAGTACCGCCGCGGATGGTCGAGTATATTATGAGTACATACAGAGGTGCTG
TTACGCGTCTCGCGTGTCAAGACTGGCTCTCCCGCCCTATACGTCCGGGGCGCGGAGTTA
AACAAGGTGACCCTCTGTCACCAATGATCTTCAACCTGATCATTAACGATCTGTTCGCCA
AGCTGCCCAAAGAGGTAGGCATACAACTAGGCGACATGTCAGTCAACGCAATGGGATTCG
CGGACGATCTCATACTCATAGCAACCACTACAGCCGGGTTGCAAGAATTGCTCGATACAT
CCGCCGAACACCTATCAAAATGCGGACTCAGTGTCAATGCGGCAAAGTGTTTCACGGTCA
GTCTGAGGGGAAACGCTAAGGCTAAAAAGACGAGTATCGATGCCGACCAGGTCTTCACCT
GCTCTGGTCGACAAGTACCGCCTTTGAAGCGATCTGACGAGTGGAAGTACCTCGGCGTCC
CATTTACCCCAGAGGGCAGGGTAATAGGCGAGCCCTTGGCGAAGCTAAGGGCCGACCTAG
AGGGGTTGACCAAGGCACCCCTCAAGCCACAGCAGAGGCTGTTTGCTTTAAGGACTGTCG
TACTTCCAGGACTATTCCACCAACTTGTCCTAGGCCGAACGACTTTAAGCCTACTCCGAA
AGATCGATGCAGTCACGAGACTGTTTGTGCGAAGGTGGCTTGCCCTCCCGCACGATACGC
CGAACGCGTACTTCCATGCCGACTCTAAGGACGGCGGACTGTCGCTCCCGACGTTCAGAT
GGAGCATACCGCTCCAGAGGCTACACCGTCTGCAGAGCCTCAAGGTACACGAAGGGGCCG
TGATACCGAGCAGCATCCAAGCGTTCTTGGATGGAGAAATTCGCCGAACTGAGCTTCGCC
TCGCAGGGCGTCTTCACA
>LINE_comp3544_g1_i5
GGGAGTAACTATGACTCTCTTAAGAGGCGGTCGTTATGAGGTGTCGGACCAGCCTTCGGG
CTGGCACTAGTATCCCAGACCAGCCTCTCATGGGCTGCGGCGAGTGCCGGCAGTGTGTCG
CAAATGGAACAAAGCAGAACATCCAGGCTTCAGCGACGACACGGCGTCGCTTCAGCGACG
ACACGGCGTCGCTCCTTCTACTACGGTAGAAGGAACGCATAACATCAAAGCAATTAGCGG
CGCTTCGGCGTCGCTTATTTTTTTTATGCCATTTTTAAAAGCAACACGCGGCGGGGACTT
GGCCGGTGGTGCTGTTGCTTTAATACGCCGTCGGGGACGACAAGGCAAGAAACGGCGCTA
CGGCGTCGTTTCTTTTTTTTATGCCTTTTTTTCAAAACAAACACGCCGCTGGTACTTGTA
TCGGTGGGGTTCCCTGCCCTACCAGTGCCTGTGCCGGCGGGAGTGTCAAAAATGTGTCAG
CCGCACACCTGGCTTATCCCCTGGCCGGACGGCCCCGCTAGCTTTACTCGGTGTCAGAAA
GCACCATGCCGCCAATACTTGTATCGGTTGGTATGTTGTGATTACACCGTCCCATATCGC
CGGGGGACGAGTAAAGATAGATAGGGACATAATGTCATGTAAACCTTGACAAAAGCAACA
CGCCGCTAATACTTGTCCTCTGCCGTGATGTTGCTCAAAATCGTCCACCTATGCATATAG
CTACGCTACGGCGCTGCTCAGATTTCACGAAGCCCATTCCATGCGGGGCACTGTCGGCGC
TTCGTTGCATCGAGGCTTAGTTTAGCAAGCGACCGCCTGCACGAGGCTCCCGCTGCAGTT
CTCTTCGGAGTTCGCTGAGAGTCGCCTCTGCGCCCAACGCGCCTGGGGGCTGCCTCCCCC
CTTGCGCGGCTCTAACTGGCCCAAAGCATAAAACACAGCCTCGGATGAAAAATGTCGGCG
AGCCCACTGGCTCCGCCGACCCAGTTAGCGACTCGCAACAGGGCGGTGAGAGGTTGGCCT
CCGGAGTGAGGACCTTTCACTGCCAATATGCGGACTGTGGCCGATTCTTTAAGACCAAGA
TCGGCCTGGGGGTTCACCAACAGAAGGCTCACAAGGACTGGTACGACAAAAACCAGCTTG
TGGAGCAGTCCTCCAAAGAACTGACAAGGACTAGGTGGAACCCTGAGGAGTCCGCTCTGT
TGGCGAGGCAAGAGGCAAAGCTTCTTTTGGAGGGAGTCAAGTTCCTCAACCAAGAGTTGG
CCAAGGTCTTCACGGACCGGACCTTGGAATCTATTAAAGGACAACGACGCAAAGCTGAGC
ACAAGTCTCTTGTGTCTCAGCTTCTGAAGGAGGTCGTCACAGCTCGGGACGAACATCAGC
CTGAGCCTGTGTTTCAGACCCCTTGCCCGTATGTGTCAAGTCCCGCCACGGCTCCGACTC
GCACTCTAAGTGAGCACTCGAACGACGAGTCGGATGCCCAGGTGTTAGATTACTTGACTT
CCCTGCCACCGATTAAGACCGACAAGTTCGACGCCAAGCGACTCGAAAACCTTTGTCGCT
CAGCTGGGGCGGTATCCCCAAATCACATCCTGGAAGAGCTCACGTTGTACCTCTTGAAGG
CCTTTCCGAATAAGCCACGGAAGGAACGTGCAGCCAAAGGGTCTAAACAGCCGGACCCTA
AGATTTCCAAAAGACGTGCTCGAAGAGCAGAGTACGCCAAAATCCAGAAGATGTGGGGGA
AAAACCGCTCCGGCTGTCTAAGAACGCTGCTGCGGGACAAACATACAGCTAATGTCCCGC
CTGCAGACGTGATGACTCCCTTTTGGGAGTCCCTCATGGCGTCGGAGAGCACGTCCACGC
CCGGTGCCAGGAAGCCCGCTAAGCTCCTTAGCGGACTTTGGTCTCCAGTCTCGCCGCTGG
AGATCCGCAAAGCCATGCCGCCAGTCGGCACGGCTCCTGGTCCGGACGGCCTGTCTGCCA
GGGACTTGAGGGCTGTCCCGCAGGAGATACTCACTCGCGTGGTCAATCTTCTTTTACTTG
CCGGGCGATTGCCCGCGCATCTTATGGAATCACGCACGACCTTGATTCCGAAGAAAGACA
ACGCGACTCAGCCATCTGAGTTTCGACCCATCACGGTGTCATCGGTCCTTGTCAGAACCT
TTCACAAGGTTCTGGCAAATAGAATGCTCCAACTGATTCCCTTGGACAAAAGGCAGAAAG
CCTTCCGACCGATTGATGGGTGCAGTGAGAATATCTTCCTGCTTGATTTTTTACTATCGT
ATGGCAGACAGAAGCATAAGGATATCTTTATGGCCTCCTTAGATGTCGAGAAAGCCTTTG
ACTCCGTGTCTCACAATGCCATCAACGACACTCTGCTAAGCGCAGGAGTACCGCCGCGGA
TGGTCGAGTATATTATGAGTACATACAGAGGTGCTGTTACGCGTCTCGCGTGTCAAGACT
GGCTCTCCCGCCCTATACGTCCGGGGCGCGGAGTTAAACAAGGTGACCCTCTGTCACCAA
TGATCTTCAACCTGATCATTAACGATCTGTTCGCCAAGCTGCCCAAAGAGGTAGGCATAC
AACTAGGCGACATGTCAGTCAACGCAATGGGATTCGCGGACGATCTCATACTCATAGCAA
CCACTACAGCCGGGTTGCAAGAATTGCTCGATACATCCGCCGAACACCTATCAAAATGCG
GACTCAGTGTCAATGCGGCAAAGTGTTTCACGGTCAGTCTGAGGGGAAACGCTAAGGCTA
AAAAGACGAGTATCGATGCCGACCAGGTCTTCACCTGCTCTGGTCGACAAGTACCGCCTT
TGAAGCGATCTGACGAGTGGAAGTACCTCGGCGTCCCATTTACCCCAGAGGGCAGGGTAA
TAGGCGAGCCCTTGGCGAAGCTAAGGGCCGACCTAGAGGGGTTGACCAAGGCACCCCTCA
AGCCACAGCAGAGGCTGTTTGCTTTAAGGACTGTCGTACTTCCAGGACTATTCCACCAAC
TTGTCCTAGGCCGAACGACTTTAAGCCTACTCCGAAAGATCGATGCAGTCACGAGACTGT
TTGTGCGAAGGTGGCTTGCCCTCCCGCACGATACGCCGAACGCGTACTTCCATGCCGACT
CTAAGGACGGCGGACTGTCGCTCCCGACGTTCAGATGGAGCATACCGCTCCAGAGGCTAC
ACCGTCTGCAGAGCCTCAAGGTACACGAAGGGGCCGTGATACCGAGCAGCATCCAAGCGT
TCTTGGATGGAGAAATTCGCCGAACTGAGCTTCGCCTCAATGATCAGGGGCAAGCTATGA
CCACCAAGTCGGCTTATAGGAAGCGCCTCGCAGAGCGTCTTCACGTATCAAACGATGGTC
GCCCCTTGACAAGATCTGGCGACGTCACAAACCAACATAGTTGGGTGACCGACGGGACCA
CCTTCGTCTCAGGGAAGGATTACGTGAAGATGCACATGCTTCGCATCAACGCTGTTCCGC
TAAGAGTGCGGACAGCAAGAGGCAGGATAGGAGACCGCCATTGCCGAGCAGGTTGCCACG
ACGCAGAAACACTTCATCATGTTCTGCAACTCTGCCATCGGACGCACGGCCCTCGCATCA
AGCGGCACGATGCCTGCATCGACTACATGTGCAAGCACATCGATGCAGGTTATACAGTTC
ACAGAGAACCCATATTTCAAACGTCCACCGGAAGACTTAAGCCTGATGTAGTGCTGTTAA
AAGACCAAACAGCCATAGTTGTAGACGCTCAAGTCGTCGGCGAAAACGCCGACTTGGAAA
AGGCACATCAGGCTAAGATCTCCAAGTATGAGGGGTTAAGGGAGCCCATACTCACGAGGT
ACTCTGTGAACGAAGTGTCATTTACATCTTTGACACTGTCCGCGCGAGGGATATGGGGAC
GTCGATCCTTTGAGCAGTTGGTCGGATTGAACCTCCTAAAGCGTGCGGCCGCCAAGATAA
TCTCTACCAGAGTTTTGATTGGCGGTTTGCACGCTCTTAACATCTTCAATAAGTCCACTG
GCGTGAAGAGGGGAAGCTCACGGTAGGCTGGCACTCCCGTCTGTTGCGAGGTTTACTGTG
CTGCCTGCAGTCTCAGGCACAAAGTAGGAGTTTAGGTTTAGTGGGTATTCTGCAAGTGTT
CGCAGCGAGTCCCACACTCCCGGTCGACAACCATCTAGACCGGGGCTCAGTGCGTAAATG
CATTATCCCTTTTTCTCCTATCAAAAAAAAAAAAAAAAAAAAAAA
>LINE_comp3549_g13_i1
ATATTTCGATATCGTTTCTTGATGCTTTCTGTGCTTTTTAACGTATACAGCTATTCTTGA
CCATGTGTCCCTTAAAAATATTTTCTTACAGAAATTGGCATATATGGTACACGTGGCACT
GAACGTGTTAATGCAATGTTTGTTAAATATTTGACAATGAACAATTAATTACAATATTCA
GATTTAATATATAAAGACAACATTTAACTCTCTTTCGAATTCTGAAAAGAAAACACAAAA
TCCTAGAGCCAAATTCCTGTTGTTGCTGCTGTTCCTGCTTCGTGTCTCCTTGTGAAACCC
ATCGTGTTCCCTCGTGAAGGAGGAGTTTCTCTAGGAGTT
>LINE_comp3549_g13_i2
GTTTGGTAATTAGAAAACATTGCCGTATAGTTGAGAATTAATTTACTTACTGATCATTTC
AATACTTTTATCAATTTTGAGAATTCAGTTGCGAAATGGGAAAGAGTGGAAATTGCAGTG
TGAACCTGTTAATACGTTCAGTGCCACGTGTACCACATGTGGTACACGTGGCACTGAACG
TGTTAATGCAATGTTTGTTAAATATTTGACAATGAACAATTAATTACAATATTCAGATTT
AATATATAAAGACAACATTTAACTCTCTTTCGAATTCTGAAAAGAAAACACAAAATCCTA
GAGCCAAATTCCTGTTGTTGCTGCTGTTCCTGCTTCGTGTCTCCTTGTGAAACCCATCGT
GTTCCCTCGTGAAGGAGGAGTTTCTCTAGGAGTT
>LINE_comp3553_g13_i1
CATTCTCATGGGTCAAATCAAATGACTGAAAAGCCTCTCGAGTGCAAAGGGTTGAATATC
AAAGTTTCCAGTTTTGTGTCAAACCATTGACTCAGAGGCGTCTCTAGTGCAAAGGGTTAA
AAGATCCTCGTCCGCGACGGGTTAATGACAGTTACAAGTTTCAATTCCTACACCTTCGAT
TCTCGGTTCGAGAGATCGTGGTTTTTCCACAGGCGTATCGTATAATCGATCGAACGGTCC
GCCAAAGACACGGAGAAACAAATAAACGGATGAAACATTAGCGAGCGATCCTAACGAATC
CTCGCCTCCG
>LINE_comp3555_g6_i1
GTGTGTGTGTGTGTGTGTGTGTTGGTATTTTTAACCTCTTGCCATACCATTTGACCGAGA
AAAATCTAAAATTGATCATAATTATGGCGACCGATATCTCGTTCGTGTTGTCATCTCGAG
TCAGACTCGTGATATTTATGTTCGGTGTGAAATTTGTATCACGAGTCAAACTCGTTACGG
CAAGGGTTAAGTAAGTTATACAGTTTACTGAAATATCGTTTATCATTGAAGCATCGTTAA
CCCC
>LINE_comp3564_g8_i2
AGGATTTTTAGCTGATAATGATTTTGATGTTGTCCTGAGTAATGCTCACATTGACACATG
TTATGTTCTGGTGTGAATGTTCGAAGGCACGAACTAAAGTACAAATAAAACGATCACACC
TTTTCTCCATTTCCCTGCAAGTTTGACCTTGAATGACCTTGAATGACCTTGACGGTGGAT
AAAAAACGTGTCGTTCCATTTGAAAAAAGAAAGTTGACCTT
>LINE_comp3578_g1_i1
GCCTTTTGGGTTGCCTGTTTCTCAGTAGATAGGGACATTAAGTCGAGTTGTTTTACGTCC
GATATATACCCGGAGGGTTTCCCCGGACGGCCCCCATGGGCGCGGGATTGGGATAACGCC
CAATCAGCGAGACTCCGCAAACCGCGAAGACTACCAGTGGCGTCCCAGGGCTGTAGGACC
CTGAGACAGACAACTGGTGGTGCCGGGTGACTTTCCACACCCTACCGGCTTAGCAGGCCG
GTGCGCGAGCTGTTGGGACGCAGCTCCCCCGCCGGGACCCTGGAAAAAGGGGTCCCTAGC
CAGCATTTGGCTTTCAACCACTGCCCCCGCGAGTCCAAACCCAAGACCGGACCGAGCCGT
AGCCCGGCGGGCGAAACCGGTCCCCGCGGTACCAGTTTTAAGGTCTACTGGTGGGACCTT
TTCGACGGAGTAA
>LINE_comp3578_g2_i1
CAATACACCCAAATCACACATAACAGCATACGCTCTCTGACAATTACACTGGATCGTATG
TAAAACATTCACAGCCATTATTCCGCATTTATTCTCGCACGCTCTCGCTCAACCATACGT
AAATATTCCGGGCACACCAGAGACGTGACCGAGTGGTCACTATTTTTCCCTTTCATTCTA
CAATTCCTACAGCATTCACTCTTTTTACACGCACTCTTTAAATGTCCACTTTCACCGCAT
TTCTGACATACACTCTCTTTTCCTTGCATTCTCTCGCCATGTGCCCAAACGCACAGCATT
TATGGCACCTCAACACACTCACATACTCTTTCAGTTTACATGCTCTCCATCCAACATACA
TTCGTCCTTCATTCATCAATCTATTCCACATTCTCACTCCCAATTCAAAAATGACATTAC
CCATACTAGCATCCTTCTTATTCGTTCTAGAAACAACACGCACACTCTCTCTGAACACTT
TCTCACTCACACAGTCCTTTAAATTCTTCTCATACAATTCCGAGATTAACTCCTCGCTCG
GAATATCGCACGGGACGTCAAAAACGATCACTTTGGCCCCGATCTTTCGGGGCTCATCCA
CTCGCATTCCAATTTCTCTGAACTTCTCGCATTCACGCATTCTCTTCATCTCGCATTCAC
TCACCGTCTCGACAGCGATACCA
>LINE_comp3578_g1_i2
GCCACACGGCCCCTGGGGCAAGTATATAGGGACATTATGTCACGTGGTTTTACGTCCGAT
ATATACCCAGAAGGTTTCCCCGGACGGCCCCCATGGGCGCGGGATTGGGATACGCCCAAT
CAGCGAGACTCCGCAAATCGCGAAGACTGCCAGTGGCGCCCCAAGGCTGTAGGACCTTGA
GACAGACAACTGGTGGTGCCGGGTGACTTTCCACACCCTACCGGCTTAGCAGGCCGGTGC
GCGAGCTGTTGGGACGCAGCTCCCCCGCCGGGACCCTGGAAAAAGGGGTCCCTAGCCAGC
ATTTGGCTTTCAACCACTGCCCCCGCGAGTCCAAACCCAAGACCGGACCGAGCCGTAGCC
CGGCGGGCGAACCGGTCCCCGCGGTACCAGTCTTAAGGTCTACTGGTTTGACCTTTTCGA
CGGAGTAAACCCCGTCTCCCGTATTTAGGATTCCTACAATCCAGGCCTCGGTGTGGCCAG
CGCTTCGGGTTCGTGGAGTCGCTACGCTCCAACGGATCCGACAGGA
>LINE_comp3578_g1_i3
CCTATCCCGGAGATACGCCGAGATCACCTTCCTCAGATACATACTGTCATGTTTGTTTTA
CGTGCAGCATCTACCGTGAAGGTTTATCCACACGGCCCCCATGGGCGCGGGATTGGGATA
CGCCCAATCAGCGGGTCTCCGCACACTGCAGAGACTTCCAGTGGCGCCCCAAGGCTCTAG
GACCTTGAGACAGACAACTGGTGGTGCCGGGTGACTTTCCACACCCTACCGGCTAAGCAG
GCCGGTGCCCGAGCTGTTGGGACGCAGCTCCCCCGCCGGGACCCTGGAAAAAGGGGTCCC
TAGCCAGCATTTGGCTTTCAACCACTGCCCCCGCGAGTCCAAACCCATGACCGGACCGAG
CCGAAGCCCGGCGGGCG
>LINE_comp3578_g3_i1
TTAAACAGAAACATTCGCTCGATTCGCATTCATTCGTCTCCTCTCAAATATACGATTCAC
AGTCATACAAAAACACTTATACATAGCCTTATTTCCTGACACACCACTCACATCCACACA
CCCATCCTCTCTCACAATCACACCACAATCACTGAGGCTGCGGATATCCTCGTACACTCG
ACAATTACACAACACATGCTCCCAGTCCTCTCGCTCACCACACACACATAAATCACTCTC
ACTCAAACCACGCTCATACAAATATGCATTCATACTACCGTGACCGGTCAAAATAAAACA
AACAAACATACCCGGATCAAAATCACTCTCCTTCCAC
>LINE_comp3578_g4_i1
GCCCTGCGACCCCTAGGGCACCTATATCTAAATCGCATTCGCTCTAGCATTCATCCTTCT
CCTTTCAAACATCTTATTTACAGTCACACAAAAACATTCATACCATGCCTTATTACCTAA
TATATTACTAACATTCACACTACCATCCTCACGCACAGTCACACCACAATTATCGAGACT
GCGGAGGTCCGCATACATACGACAATCACACAACACATGCTTCCAATCCTCATTCGCTTC
TCCACACGCACACAACGGACTCTCACACAAACCACGCTCATACAAAAACGCATTCATACT
TCCATGACCAGTCAACATAAACAACACATACATACCAGGCTCAAAATACGCACACTTCCA
CGCAAACCGTACATCCTTTATAAACTCATACGTAACCCGTCCATTCTGACATTCATCCCA
ACGCCTCTGCCACTCTTCATACAGCCTTTCGTCCAAGAGTCCCATACACTCCGCCGGGGT
>LINE_comp3578_g1_i4
TCTTGGCCGTACCTGCAGTAAACAGACACCACGTACACCTCACCGAAATCCCCCTTGATC
CACACACACACCCCATGCTCGTCAGTTAACTCTCTGACGCACAAGGATTCCAATCGCACA
TCATTCACAACTATGGCGGCCTTTTTCAGGCCCGCATCAGACACATACACATTCATTCCT
GAAGGTAAACCCTTCACACAACCATCCACGGCAACATACGGCTCTTGCAGTATGGCCACA
CTCACTCGTTTCTCATTCATCAAAACACCCATGTCACACATAACCGCATACGCACGCTGA
CAATTACACTGGATCGCATTTAATACACACACAGACATTAATCAGCACTTATTCTCGCAC
GCTCTCGCTCGGCCATCCTTACATACTCCGGGCACTCTAGTGACGTAACCGAATGGTCAC
TCTTATTACCCTTAATCTTACAGTTACGACAACACTCACTCCTTTTGCACGCACTCCGCA
TATGCCCATACTCACCACACTTCTGACATACACTCTCTTTCTCACGACATTCCTTAGCCA
TGTGCCCGAATGCACAGCATTTGTGGCACCTCAGGACACTCACAAACTCTTTTATTTTGC
AGGCACGCCAACCAACATACACACGACCAGCACACATCAACTTATTCCACATGCATACAC
TTAACTCAGTAGATAGGGACATAAAGTCAAGTGGTTTTACGTCCGATATATACCCAGAAG
GTTTCCCCGGACGGCCCCCATGGGCGCGGGATTGGGATACGCCCAATCAGCGAGACTCCG
CAAATCGCGAAGACTGCCAGTGGCGCCCCAAGGCTGTAGGACCTTGAGACAGACAACTGG
TGGTGCCGGGTGACTTTCCACACCCTACCGGCTTAGCAGGCCGGTGCGCGAGCTGTTGGG
ACGCAGCTCCCCCGCCGGGACCCTGGAAAAAGGGGTCCCTAGCCAGCATTTGGCTTTCAA
CCACTGCCCCCGCGAGTCCAAACCCAAGACCGGACCGAGCCGTAGCCCGGCGGGCGAACC
GGTCCCCGCGGTACCAGTTTTAAGGTCTACTGGTGGGACCTTTTCGACGGAGTAAACCCC
GTCTCCCGTATTTAGGATTCCTACAATCCAGGCCTCGGTGTGGCCAGCGCTTCGGGTTCG
TGGAGTCGCTACGCTCCAACGGATCCGACAGGAATCCGCCGCGGTGACCAGGCCAAGGCC
TGATCCCGCGAACCTTCGCCTGTCGGGGTTCCGCCCTGCGACCCCTAACGGGACACCTAA
AAATAAACTAAACTAAACATTCACACGATTCACATTCATCCTTCGCCTCTCAAATATACT
ATTCACAGTCATACAGAAACATTCATACGTAGCCTTACATTCAAGCACACGACTCACATC
CACACTCCCATTCTCTCTCACAATCACACCACAATTATCGAGGTCACGCAAATCCTCATA
CAGACGACACTTACACAGCACATGCACCCAATCTTCATCAGCCTCACCACACATACACAA
CGCACTTTCACTCAATCCACGTTCATACAAATACCCATTCATACTGCCATGGCCGGTAAT
CATGAACAACACATACATACTCGGATCCAAATACTCACACTTCCATGCAAACCTTACATC
CCTTATAAATTCATACGTTACCCGTCCATTCTCACATTCATCCCATCTTCTCTGCCACTC
ATCAAACAACCTCTCATCCAAAATCCTCATGCACTCTGCCGATGATTTCCCATTCAACTC
ATTGTCATTCACACACTCATTCATACCCACGCTCACACCATTTTTCCACCTAAACATTAT
CGCCCGCTTGCGACACTGCAGGTCCCATGGGAGGGTTCCCATGAGGACCTGCAGTGCCTC
CGTCGAGACGGTTCTACACGCTCTCACACATCCATACAACGCAACTCTCTGACACCTCGC
AAGCATTCTCCTTCCATACTCATATTTTAGGACATCACACCATGCACTCGATCCATACAA
CACACACG
>LINE_comp3578_g1_i5
TCGCTAGAAAGTAGATAGGGACATTAAGTCATGTGGTTTTACGTCCTGTACATGCCTCGA
AGGCTTCACAAGACGGCCCCCATGGGCGCGGGATTGGGATACGCCCAATCAGCGGGTCTA
CCGCACACTGCGGAGACTACCAGTGGCGCCCCAAGGCTGTAGGACCTTGAGACAGACAAC
TGGTGGTGCCGGGTGACTTTCCACACCCTACCGGCTAAGCAGGCCGGTGCCCGAGCTGTT
GGGACGCAGCTCCCCCGCCGGGACCCTGGAAAAAGGGGTCCCTAGCCAGCATTTGGCTTT
CAACCACTGCCCCCGCGAGTCCAAACCCATGACCGGACCGAGCCGAAGCCCGGCGGGCG
>LINE_comp3578_g5_i1
CACAACACATGCTTCCAATCCTCGCACGCTGCACCACACACACACATACTACTCTCACTC
AATCCGCGCTCATACAAGTACCCATTCAAACTTCCATGCCCGGTAATCACAAACAACACA
TACATACTCGGCTCGAAATACTCACACATGCACGCAAACCTTACATTCTTAATAAATCCA
TACGTTACCCGTCCATTCTCACATTCATCCCATCTCCTCTGCCATTCGTCAAACAGTCGC
TCATCCAACAAATCCATACACTCTGCCGATGTTTTTCCACTCAACT
>LINE_comp3597_g2_i1
ACGTGTGCTCTTCCGATCTGTTGACTGAATGTAGTGTGTATGAGGATATGAGAGACCTGA
GTGAATGTGGAGTGATTGTAAAATGTTGACGGTAGTGTGAGTGTGAGTGGAGTGTCAGCG
TGTAAGGCAACGTATGAATATTTCAGTATGTTTGCGAAAATGATGTTTGAAAGAAGAAGA
GCGCTTGTTAGAGTAAACGTGTGAATGATGTGCCGAGGGCGCAGGAGGGCTGCCGGGCTG
TAACCCGGAGGCCTTTGGGGAGTAACGACTCCACGTATCCGAGTTGGCTTCACCCAAGTC
GGGGCTTGCAAGAGTCCCAATGGGAAGTGGATAAGTTCCACGACAGGCAGACCAGTACGG
GGGGGGGCGTGTCGGTGAGGGTTTTCCTTTCCTAGGGGATGATGGCCAGGCTTGCCCACC
GGTGTGTGTTCTCTTCGGAGACGCACCCCGGGACGCGGCCCGGTACATTGTCTCCTCGGA
GGGGTCAAAAACCCGGATGAATCTGATGATTCTCTGAACCTTATGGTACTTACCTTCGGG
TACTTACCTGGAGGAACGAGTTTCTTCGGAGAAGTTCGGGACCCTCATCGACGGAAAAAG
GTCCACTCACTCCACCTCCTCGTGGGGCTCCCTGGGACTCTGTTCCGGTGGCTTCGGCTA
TCTGAAACAGAGTGCGAACGGGGTGAGATGGTCGACCAACTTCCTCGAAAGAGGGGGCGT
ATAACGTAAACCGGTGGTCATGTTTTACCGGAACGGGGGTCTTGCCTTAATCGGCTGGGC
AGTGAGAATGACAACCTCTATAAAAAATCTCTGCCTCAAGTTCCGATTCGTGGCAATGGA
GCTGTTCCAGATATTACACTACTCGCCAGGGGGTGGCCAGCGGGAGCGCCGGTGATGAAT
GACCAACCTCCGGGGCGTGGCGCCCCCGGTTGATGTGGAGCCGTCCGCATTGAGGAGGGG
TAAAGTGCAGGGTCCTGTTCTCCCCCCACTAATATTGATAGGCCACCGGACCCTTCGGAG
AATGGAGGCCGTATATGAAATAATGAATAAAGCACCTTTAACGAGGAAAAATACGGATAC
CGAAAAAAAGGAATGAAACATGGCAACGAAAAAGGACACGAAAATGGGAGACGAAGAGGA
CAAGAAGACGGACTGTGTAGGGCGGCCTATAAAGGAGGTGACCATTACTATGGTGGAAGG
CTCTGGTATGAAGACCAGGAACAAAGCTCACGCTCCGACTGGATCGGACAAGAAAGAGGA
AAGGGTGGAGATTTTTACTCCGCGCGTCTCAACAGGACGCCACCCCGCGGAGTTAGACCC
GTCATGCGTAAAGGTGCTAGAGAGGAGAGAACGGAGTAACTCCGTAATCCCAAAACGGAG
GGTGAAGAAGAAGAAGGTTGGCGACGAAGAGAATAGAAGAATTCCACAGGACCGAGATGG
CGAGGGAAAAGCAAGAAAGGACGGAACACGCGAAGAGGATGAAAGCCCCGACGCTAACCT
TAGAGCTCGACCATACATTGATAGACGGGAAGCAACCCGATGTAGTTACCGCTGGTCAGG
AGGACGCTGAAGATAGGGGAAGCGACACTTATATCACCCCGCAGCTTCAGGAGGCGATAT
TCTGAAAACCCGTAAGAGCAGCTGTAGTTCTCAAGGGTACGGAAGATCTCACGTTTAACA
GCGAAGACAAACCAGGGGACAACGGGCTTACGCGCATACGTAGAAAGTCACCCAATATAC
GTGGTGGTACAGACGGTCGAGTGAAGCGTGCACCGAAGCCGATGGTTTCAGGTGAGGCCG
ACAAAAATGTGAATGGTACCATCGCGCATCTGGTGGAAGAGATGCACAAAACGATTCGCT
TGCTGGCCAACAAAATGGACAAGCAGGAGCAGGAAGCCATTGGGAGGCATTTTGAGACCA
TTAAGGGAATTGTTTCCGGAATCACCAGAAACAAGAGGAAGTTTGAATTGTCACCGTCCG
CGGTGAATAATGAAGAGAAGGGAGCAAGAACTGAGGCAACGAGGGATGAAGAGGATACGT
GAACAAAGGTGACTAGCAAGAGAAGAAAGACACGGCGGCAGCACCAGCGGTGGACGGGAC
GGAATTCCCTCCCTTACCTACAAAAAACGCGGCTAGGGGCACACACAATAACACCGAAAA
TCGGATGAAGAAGATAATTAATGTGGAAAAAAGCCCATATGAGTAGGTAAAAAGACCGGC
AGGCGAATCAAACACAAGTGTGAAGCGATTGTCATACCTTCTAAAGGTGATGAAAAAAGC
TACGTTGAGATCCTTAGGAAATTAAGAGAGGGTAACACGACCTCTTCCCCCTTATACGGG
ATCAAGAAGATCCGAAAAAACAGAAACGACTCTGCATTACTGGAACTAGAGAAAGAGACC
AATGCCGAAAAGGTACTTGAGACGATTAAGGAGAAAGTTGATGGGGTAAATACGAAGAGG
CTGCAGCCCATGACCCTCGTGGAATACCGAGACGTGGACCCCACGGTGATTCTAGAGGAG
GTCAAAGATGTCGTCAATGGAGTTATTGATCCCAACTCGAGCACAGACATCAGGATTAGG
TACCTACCCAGAGGAACCAAGGTTATTAGGGTGATTACGACGACTGTAAATGAAAAAAGA
ACGCTTGGCTTTTGGATTGACTTCTTCCACACCAAGGAACTTACCAAGAGTGAACAGATG
TGTCGGAGTGAACGGTGAAAGATTATGCCGGAGATGCGGTCTGGTCGAACACTACGCCAA
TGAGTATAGTGCAACGTAGAGTTGCTACATTTGTATGAAAGCTGGACTTGGAGAAAACAG
GCTGGTACACCTTGCGGGTGGACCAAGATGTCCAGCCTATAAAGAAGAAATGAGAAGGGC
ACAAAATTCAAGATAGTCCAGATCAACTTAAATAGTGTAGAGTTGCACATGAGCTGTTGC
AACAAGCGATGGTGGATATAGATAGTGACGTGGTGGCCATAAGCGAACCCCTATTCAACA
GGAAACCCTAGTGGCACGATAATGGCAAGCACGAGTCGATACGGGCTCCAAACGAGCAAT
TCAGAAAGAGATGCTTTAAGGAATTTGCCATTGAAGGGGCGGTGGCTATGTTGACTGGAA
CATACACTACTGTATCGTGCTATCTGCGACCTAGCTTGTCCTTAGAGGTTTACGAGAGCA
AGCTGGAGTGCATCGCCACGTGCGGTCCTGAGAGCCATATAATGAGTGACTTCAATACAA
AGTCCACCGCCTCGGGATCCTCGCTTACAGACCCCAGGAGTAGGATAATGATGGAATGGG
CGGAGCAAGTTGGTGTGATTCTCCTGATTGCTAAGGGTGGACCCACCTTCTCACGAAACG
GGCGCTCCACTACAATCGATATCACTTTCACCACTGTTGCATTGTTGCGCAAATGAAAAT
CTAGCCAAGTCCTAGAGACTTACTCGAGATCAGACCATAAATATGTGGCCCACACGATCG
ATACCGACAAGATCGCAAACGAACTTGACAAGTGGACGGTGACTCCTCCTACCAACGTGG
GACGTGACATGAGTGCATCGAAAATCTTCATTCGGGTTTCGATGCGGCGTTTATACCTGT
CCTCAAAGGATTGTGTAATAAGGCGGGCGATCCTTGGTGGAATACAGAGATTGCACTATG
AGAGCGAGGAATCTGTACTCTAACGCGAGAAAGAGGGGGACAGAACTGAACTATGACGGG
CCGCTATACAGTGACTGTAGGAGAGAAGTTATGATCGTGATCCTTAGGGCCAAGGAGAGG
TGGTGGAGGGCAATGTGTGACGATGTCGAGAAAGATAAATGGGGAAAACCACATAGGACG
GTCATGAAAAGCATAAAGTCACCTATGCAAGCCAAAGACCTCACCTGAGAGGAAGCGGAG
GTCGAGATGAGTAAGCTCTTCCGCATTACTCCACCAGATGACGAACATCCTGAGGCAACG
GTAGGCACCACTGAACTGAAACTTGAAGAGGACGCGCTGACAGTGATGAGACCGGAAAGT
ATAGAATTATATTAAAAATGCTTTCAAGTCGATAAGAAGAAAGCACATCTGCGACATTAT
CGACAGGAAACGTTTCCCTATCTGGCTGAGATGTTTACTCAGAAATTACCTTACAGATAG
GGAGATCCTGATTAACACTTTAGACCGAGGGCAGATGCGTCTGGGCGTTTATGCAGGTGT
CTCACAGGGGTCGGTCATCGGACCCCTGTTATGGATCATCTGGTACGACGATATACTAAG
GCTGCCGATCCCCCGAGATATCACGCTCGATGGGTATGCCGATGATCTGATAGTCGTCAT
CACTGCCAGGGACGTTCAAGAGGCCATCGCCATAACCAAGAACACCGTGGGACGCATAAG
GAACTCGATGACAGGTGCTGGGCTGCAGCTGGCAAGTGAGAAGACTGAGTTGACGCTTTT
CACTGGCAGGAAAAGAAGAACTCCTGTATGCATCAGGGTCGGATGCCAAGAGATCGGAGA
GGCAAAGGAAGGAAGTAAGCAGGAGCCTCGCCAACCCTAAGGCCAGTTCTACCGGCCTCT
TTGCCTCTTTCCCTCTTCCTGACCGAGTGGCTGAGTAATCCGTTCGGCGAGGGGCGAC
>LINE_comp3597_g3_i1
TCCTTATACGGATGTTGTATGGTGTGAGTGGTGATGAGAGTGTGAAGGTTGGCAGGAGAT
GGGTATGTAAGGACGTCTGCTGGGAAGAGTATGTGAATGATTTGCGTGTGACTGCTGAAT
CGAATGCGAATGAGTTGTTGTGTGAGTCGAATGTGGACAGAATGGTTGAAACACTGATGG
GCTGGATCCAGGGGGTGAATGGTAAACATATGAGAGAGAGTAAACGTAAGAGTGATAAGA
AAGTTGTGTGGTGGACGAATGAGTTAACTGCCCTTAAGGGCAGAGTGCGAAAGAGCCGGC
GTGAATGGCAAAGAGCGAGAAAAAGAAGTGTGAATGCTGATGTGAAATTGAGAGAGTACA
AGAGAGCGCTGAATGAGTATAAGTACCGAATGAGGAGAGTGAAAGAGGAGAACTGGAAAC
AGTTCTCCAGAGTGTCTGTAAACCTGGATCCGTGGGGCCCAGTGTATAGAGTATGTCGTG
GTAAGAATGCAAGAGAGAGTATAAGTGCATTGAGAGTGAATGATGTAGTGTATTCGACGT
GGAAGGAGTGTGCGAATGTGTTACTAGAATGGTTCTTCCCAGCGACAAGTATGCAAGATG
TTAGTATGAATGATGCGATGAGGGATGATACGAGTGATTTTGTGAGAGATTTTGAATGGG
ATGAAGTAAATGCGGCTGTAAGGAAGGCGAGATTGGGTAAGGCACCCGGTTTGGACGGTA
TAAATGGTGAGATGTTGCGAATGATATGGAATGCGATTCCGGGATGGATGGTGAGTGTAT
TTAATGCATGCCTGAGGAGTGGTTGTTTTCCGTCTGTGTGGAAGGAAGCGCGTCTGGTCA
TTATACCAAAGTCCCCTGAGAAACCGCGAACGGACCCTGCGTCGTACAGACCTATTAGTT
TATTGCCCGTGTTGGGGAAAACGCTGGAGCGAATGATGATTGCGCGATTGGAGAACAGAG
TGAATGCGAGTATGAATGAGGCCCAACACGGGTTTCGCGGGGGCCGTTCGACGGAGAGTG
CATGGATGAATGTTAAGAAGTATGTGAGAGAGTGTGATAGTAAATATGTTCTTGGTGTGT
TTGTGGATTTTAAGAGTGCGTTTGATTGTTTGGAATGGATGCGTGTGATTGAGAAATTGT
GTGAGATTGGTTGCGAGGAAGTAGCTCTTTGGAGGAGCTACTTCCAAAACCGCAAGGTAT
GTATGATTAGTGTAAATGACGTCGTGTGGAAGAATGTTGAAAGGGGCTGCCCACAGGGGT
CCATCTGTGGTCCGTTCATCTGGAACTTAATGATGGATGGGCTCCTGTGGCGGTTGAGTG
AATGCGGGTGTAAATGCGTTGCGTACGCTGACGATTTGCTGTTGCTTGTAGACGGACAGA
GCCGAGTGGAAATTGAGCGAAAGGGGAGTGAATGGATGAGTGTTGTATGCGAATGGGGTA
TGAATGTTGGTGTGAGGGTGTCCGAAAATAAAACCTCGGCCACCCTCCTCAAAGGTCGTG
TGAGTCTGACGAGGTGCCCGAGCGTGAGAATGAATGGAAGAATGGTTCGTTACGCGGCGA
AAGTGAAGTATTTGGGTATATGGATGAATGAGAGAATGAGTTTTAAAGAGCACTTGGAAC
ACCTCAGAGTGAGAGTGATGAATGTTGTGGGT
>LINE_comp3597_g4_i1
GAACTTGGGTGCGAGGAAGTAGCTTTATGGAAGAGCTACTTCCGAGACCGCAAACTATGT
ATGATAAGTGAGAATGATATAGTATGGAAGAATGTTGAAAGGGGCTGTCCACACGGGTCC
ATCTGTGGTCCGTTCATCTGGAACATAATGATAGATGGACTCCTGTGGAAGCTGAGCGAA
TGTAATTGTAAGTATGTGGCGTACGCTGATGATTTACTGTTGATTGTGGAGGGGCAAAGC
CGGGTGGACATTGAGCGAAAGGGGTGTGAATGTATGAATATTGTATGTGAGTGGGGTATG
AATGTAGGCGTGAGGGTGTCTGAGGGTAAAACCTCAGTCACTCTCTTAAAAGGCCGCGTG
AGTTTGACGAGGTGTCCGAGTGTGAAGATGAATTGGAAGGATGATAAAGTATGCAGAACG
TATAAAGTATTTGGGTGTGTGGATGGGAGAGAGAATGAGTTTTAACCCTCACCTGGAGCA
CCTTAGGATGAAAGTGATGAATGTAGTTGGGCAAATGAGACGTGTGCTAAAGTGTGAATG
GGGAATGAAAAAGCGAGCGGTGAGAATGGTTTACAAAGGAATGTTTGTCGCGTGTGCATT
GTATGGATCGAGCGTGTGGTGAGAATGTATGAAATTTACGTATGCGCGTGATACGTTGAA
CAAATGTCAGCGAATGATGATGTATGCCTGTTTGAATGTCTGTCGTACCGTGGCGACAGA
AAGTATGCAGGTCCTCATAGGGGCCCTACCTTGGGACCTTGAGTGTATGAAACAAGGTCT
GGTATGTATGATTAAAAATGGATGGGATGTATGTGAGAATGACTTGGTGTGCATGGAAGA
TTTGAATGGGAAAACCGTGGATGAAAGAGTGGACCTCGTGAATGAAAGAGTATATGCTGG
ATGGCAAGCCAGATGGAATGAATGCGTGAATGGCAGAGTGTTTTATGAGTTTATTAAGGA
TGTGAGATTTGGTGAATGTATCTGGTTTGATCCGAGTGTGTATGTATGTTTCTTGATGAC
TGGACATGGAGGCATGAATGGATTTCTGCATAGGAGAGGGTTAAGCGAGAGTGCAAGATG
TGTGTGTGGTTGTGA
>LINE_comp3597_g5_i1
TGTCCACAGGGGTCCATCTGTGGTCCATTCGTCTGGAATTTGATGATGGATGGGCTCCTG
TGGAGGTTGAGTGAAAGTGCGTGTAAGTGTGTCGCGTACGCTGACGATTTGCTGTTGATT
GTGGAGGGGCAGAGCAGAGTGGAGATCGAGAGGAAAGGGAGTGAATGGATGAATGTTGTG
TATGAATGGGGCGAGAGTGTAGGAGTGAGGGTGTCCGAGCGTAAAACCTCGGCCACCCTC
ATGAAGGGGCGATTGAGTGCAACGAGGTGTCCATGTGTGAGAATGAATGGGAAATTGATA
AAGTATGTAGAGCGAGTGAAGTACCTGGGTGTGTGGATGAGCGAGAGAATGGGTTTTAAA
GAGCATTTAGAACACCTCAGAGTGAAAGTGATGAATGTTGTAGGGCAAATGAGAAGAGTG
TTGAAGTGTGAATGGGGAATGAGAAAGCGTGCTGTGAGAATGGTGTATAAAGGATTGTTT
ACGTCTTGTGTAATGTATGGTGCGAGTGTGTGGTGT
>LINE_comp3597_g2_i2
ATAAGGAAGCCGCGGGGTCCGATCACCTCACGGTGCGCGCCTGTAAGGAAGCTATAAGCT
GTTTCCCGAGAAGTTCTCTGATATCTTCCGGGCTTGTGCGGCAAATGGAATTTTTCTTGA
GAGGTGGAAGGGGGACCGTTTGGTGTTGATTCCCAAGGTTGGCTCAAACGCAGAGATTAA
GGGGTAGGGGGGCGGGTCGGTGAGGGTTTTCCTGTCTGGGGAGATGATGGCTGGGCTTGT
CGGACCGGTGTGTGATCTCTTCCAGGACGCACCCCGGGACGCGGCCCGGTACATTGTCTC
TTCAGAGAGGTCAAACACCCGGATGAATCTGATGATTCTCTAAACTCTATGGTACTTACC
TTCGGGTACTTACCTGGAGGAACGAGTTTCTTCGGAGAAGTTCGGGACTCTCACCGGCGG
AAAAGGGTCCACTCACTCCACCTCCTCGTGGGGCTCCCTGGGACTCTGTTTCGGTGACTT
CGGCTATCTAAAACAGAGTGCGAACGGGGTGAGATGGTCGACCAACTTCCTCGAAAGAGG
GGGCGTATAACGTAAACCGGTGGTCATGTTTTACCGGAACGGGGGTCTTGCCTTAATCGG
CTGGGCAGTGAGAATGACAACCTCTATAAAAAATCTCTGCCTCAAGTTCCGATTCGTGGC
AATGGAGCTGTTCCAGATATTACACTACTCGCCAGGGGGTGGCCAGCGGGAGCGCCGGTG
ATGAATGACCAACCTCCGGGGCGTGGCGCCCCCGGTTGATGTGGAGCCGTCCGCATTGAG
GAGGGGTAAAGTGCAGGGTCCTGTTCTCCCCCCACTAATATTGATAGGCCACCGGACCCT
TCGGAGAATGGAGGCCGTATATGAAATAATGAATAAAGCACCTTTAACGAGGAAAAATAC
AGATACCGAAAAAAAGGAAC
>LINE_comp3597_g2_i3
AATGGACAAGCAGGAGCAGGAAGCCATTGGGAGGCATTTTGAGACCATTAAGGGAATTGT
TTCCGGAATCACCAGAAACAAGAGGAAGTTTGAATTGTCACCGACCGCGGTGAATAATGA
AGAGAAAGGAGGAAGAACTAAGGCAACGAGGGATGAAGAAGATACGTGGACAACGATGAC
TAACAAAAGCAGGAGGAAGAAAGACACGGAGGTAGTACCAGCGGTGGACGGGACGGAATA
CCCTCCCTCACCAACAAAAACAAGGCTAGGGGCACACTCAATAACACCGGAAATCGGATG
AAGAAGGCGATTAATGTGGAAAAACAGACCATGTGAGTAGGTAAGAAGACCGGCAGGCGG
ATCAAACGCAAGTGTGAAGCGATTGTCATACCTTCTAAAGGTGATGAAAAAAGCTACGTT
GAGATCCTTAGGAAATTAAGAGAGGGTAACACGACCTCTTCCCCCTTATACGGGATCAAG
AAGATCCGAAAAAACAGAAACGACTCTGCATTACTGGAACTAGAGAAAGAGACCAATGCC
GAAAAGGTACTTGAGACGATTAAGGAGAAAGTTGATGGGGTAAATACGAAGAGGCTGCAG
CCCATGACCCTCGTGGAATACCGAGACGTGGACCCCACGGTGATTCTAGAGGAGGTCAAA
GATGTCGTCAATGGAGTTATTGATCCCAACTCGAGCACAGACATCAGGATTAGGTACCTA
CCCAGAGGAACCAAGGTTATTAGGGTGATTACGACGACTGTAAATGAAAAAAGAACGCTT
GGCTTTTGGATTGACTTCTTCCACACCAAGGAACTTACCAAGAGTGAACAGATGTGTCGG
AGTGAACGGTGAAAGATTATGCCGGAGATGCGGTCTGGTCGAACACTACGCCAATGAGTA
TAGTGCAACGTAGAGTTGCTACATTTGTATGAAAGCTGGACTTGGAGAAAACAGGCTGGT
ACACCTTGCGGGTGGACCAAGATGTCCAGCCTATAAAGAAGAAATGAGAAGGGCACAAAA
TTCAAGATAGTCCAGATCAACTTAAATAGTGTAGAGTTGCACATGAGCTGTTGCAACAAG
CGATGGTGGATATAGATAGTGACGTGGTGGCCATAAGCGAACCCCTATTCAACAGGAAAC
CCTAGTGGCACGATAATGGCAAGCACGAGTCGATACGGGCTCCAAACGAGCAATTCAGAA
AGAGATGCTTTAAGGAATTTGCCATTGAAGGGGCGGTGGCTATGTTGACTGGAACATACA
CTACTGTATCGTGCTATCTGCGACCTAGCTTGTCCTTAGAGGTTTACGAGAGCAAGCTGG
AGTGCATCGCCACGTGCGGTCCTGAGAGCCATATAATGAGTGACTTCAATACAAAGTCCA
CCGCCTCGGGATCCTCGCTTACAGACCCCAGGAGTAGGATAATGATGGAATGGGCGGAGC
AAGTTGGTGTGATTCTCCTGATTGCTAAGGGTGGACCCACCTTCTCACGAAACGGGCGCT
CCACTACAATCGATATCACTTTCACCACTGTTGCATTGTTGCGCAAATGAAAATCTAGCC
AAGTCCTAGAGACTTACTCGAGATCAGACCATAAATATGTGGCCCACACGATCGATACCG
ACAAGATCGCAAACGAACTTGACAAGTGGACGGTGACTCCTCCTACCAACGTGGGACGTG
ACATGAGTGCATCGAAAATCTTCATTCGGGTTTCGATGCGGCGTTTATACCTGTCCTCAA
AGGATTGTGTAATAAGGCGGGCGATCCTTGGTGGAATACAGAGATTGCAGACGCCCGGAA
AAAGACTATGAGAGCGAGGAATCTGTACTCTAACGCGAGAAAGAGGGGGACAGAACTGAA
CTATGACGGGCCGCTATACAGTGACTGTAGGAGAGAAGTTATGATCGTGATCCTTAGGGC
CAAGGAGAGGTGGTGGAGGGCAATGTGTGACGATGTCGAGAAAGATAAATGGGGAAAACC
ACATAGGACGGTCATGAAAAGCATAAAGTCACCTATGCAAGCCAAAGACCTCACCTGAGA
GGAAGCGGAGGTCGAGATGAGTAAGCTCTTCCGCATTACTCCACCAGATGACGAACATCC
TGAGGCAACGGTAGGCACCACTGAACTGAAACTTGAAGAGGACGCGCTGACAGTGATGAG
ACCGGAAAGTATAGAATTATATTAAAAATGCTTTCAAGTCGATAAGAAGAAAGCACATCT
GCGACATTATCGACAGGAAACGTTTCCCTATCTGGCTGAGATGTTTACTCAGAAATTACC
TTACAGATAGGGAGATCCTGATTAACACTTTAGACCGAGGGCAGATGCGTCTGGGCGTTT
ATGCAGGTGTCTCACAGGGGTCGGTCATCGGACCCCTGTTATGGATCATCTGGTACGACG
ATATACTAAGGCTGCCGATCCCCCGAGATATCACGCTCGATGGGTATGCCGATGATCTGA
TAGTCGTCATCACTGCCAGGGACGTTCAAGAGGCCATCGCCATAACCAAGAACACCGTGG
GACGCATAAGGAACTCGATGACAGGTGCTGGGCTGCAGCTGGCAAGTGAGAAGACTGAGT
TGACGCTTTTCACTGGCAGGAAAAGAAGAACTCCTGTATGCATCAGGGTCGGATGCCAAG
AGATCGGAGAGGCAAAGGAAGGAAGTAAGCAGGAGCCTCGCCAACCCTAAGGCCAGTTCT
ACCGGCCTCTTTGCCTCTTTCCCTCTTCCTGACCGAGTGGCTGAGTAATCCGTTCGGCGA
GGGGCGAC
>LINE_comp3597_g3_i2
AGAGAGAGTGCGTGTTGTCAATCGTATGAACAGAAAGGGAGTGAATGTAGGAAATGCGGT
GATTGAGTTGACAAAGCGTATGCGTGATGTGGTAGTGAACGAGGGCAGAGTGTATGTTAA
ATGGCGTGCGTGCAAGGTGAAAGATTTTGTGAACGTTTTGCGGTGTTTCAAGTGCTTCGC
GTTCGGGCACATGATGCGTGAGTGTAGCATGAAAGAGAGATTGTGCGAGAAATGTTGCGA
GAGTGGGCACTTGAAAGAAAAGTGCAAGGGTGAATGCGTGTGTAGGAATTGTAAATTAAG
GGGACGAAAGGGAGACCACTCGGTCATGTCCGTCGAGTGCCCGGAGTATGTGAGAATGAT
AGAGCGTGAAAGGATGCGTGTATGCGACGATTAGTCAATGTATGAATGTTTTGCAGATGA
ATTGTCAGCGTGCGTATATGGTCATGTGTGATGTGAGCAAGGTAATGTGTGAGAAACGGG
TGAGTGTTGCTTTATTGCAAGAGGTATATGTGTATGATAGTTGCGTGAAAGGGCTACCGT
CGTCCTGGCGGGTCTTCTTCGACTCGGAGGAGCCCGGGAGGGCGGCGGTGGTTGTTGCGA
ATGAGAACTTGGATGCGATGTGTGTGAATGATCTAACGTGTGAGCTTGGTGTATGCGTGT
GGATTCGTGGG
>LINE_comp3597_g6_i1
GTGGAAATGAGGCCACCTTCCGCAAAAGGTCGGACACTAGTGTCCAGGAGCGCGAGCCCG
GTAAAACGGGTGAAACGAACGGCTTCCGACTTGGGAGAGGCGGCGGTTGCTCCTGGAACG
AGCGCGAGTGTATGTGTGGGTGCGAGTGTGTGTGAGAAAGAGAGCGTGTGTGAAGTCGAG
AGAATGCGGGAAACAACGAGCAAGATGCGGAAGTTTCTGTTTGCCGAGAGCAACCGGCTT
TCGAAACAATGCATCGAGTTTTTCCTGGGATGTGCTGCTGAATATGAGGAAGTGATGGTG
GATATGTTGAGGAAGAATGAGAGACTGAGTGGAAGGCTGAGCGAATGTGAGAAGTATGTG
GAACAAAGAGTGAATGAATGCGTGCAGCGAGTGAGTGAAGCGAGACCGTTATCCTATGCA
GGAGCGGCAGGAAGAGTGACTGGCAGTGTGAATGTGAAAACGAGTAGCGGATCAAGCCAG
TGTGTGAGTGAGAGTGTGAGTGTCAGGCCGCGTACTAAAACGTACGCGGTTGTTGTGAAA
GCGAAGGATGAGAGTGCAAAATTAACGAGTGAGGATGTTAAACAGAAAGTTTTAAAGAAT
GTGAGTGGTGAACTGAATATACGTGTGCGTGCGGTGAGAAAAACAAGAAGTGGAGGGCTT
GCCATCGAGGCAGCTAGTGAGAAAGAGGTGAGAATGCTGAGTGAGTGCAAAAAGTTTGCG
GATCTGGGGCTTAAGGTAGAGGCCCCCAGAAAGATTGGTCCGAAGGTTATCATTTTTGAT
GTCGAGAATGAAATGACTAACGAGGGCCTGCTGAGTGAACTGTATGCGAAGAATTTCAAG
AATGAGGGTATAAATGAAAAAGAGTTTAGTGAGAGAGTGAGAGTGGTAAACCGGACGAAT
AGAAAGGGAATGAGTGTTGGAAACGTGATTGTGGAAATGAGCAAGAGAATGAGGGATGTG
TTGATGAACGAGGAACGGGTATATATTAACTGGCGTGCGTGTAAAGTGAAAGATTTCATG
AACGTTATGAGGTGCTTCAGGTGCTTTGCATTCGGGCACATGATGCGAGAGTGTAGTTTG
AAAGAGCGTTTATGTGAGAGATGCGGAGAGAGTGGGCACTTGCGTGACAAGTGCAAGAGC
GAGAGTGCTTGCAGGAACTGCAAGTTAAAGGGGCGAAAGGGTGACCACCCGGTGATGTCA
ACGGACTGCCCCGAATATGTGCGAATGGTAGAGAGAGAGAGGATGCATGTATGCGATGAC
TGAACGTTGTATGAATGTATTGCAGTTAAATTGTCAGCGTGCGTATATGGTTCTGTGTGA
TTTGGGTAATGTTATGTGTGAAAGGGGTGTGAGTGTGGCATTGTTGCAGGAGCTGTATGT
GAATGAGGGATGTGTGAGGGGACTGCCGTCGGCCTGGCGGGTTTTCTCCTGTTCGGAGGA
ACCCGGCAGGGCGGCGGTGGTCATAAGGGATGAATGTATAGATGCTGTGTGCGTGAATGA
ATGTACGAATGAATTTGGAGTGTGTGTGTGGTTGAAGGGAGATTTCGGAGAGATGATTGT
GGTATCCATGTACTGCCGGTACGGACGAGACATCGAACCGTACCTGGCGTACATGGATAG
TGTGAATGGGTTTGCGCGTGGTAAGTATGTTTTGTTTGGTATGGATGCTAATGCGACCTC
CCCCTTGTGGTACAGCAAGGGAGGGGGTCGCAGCAGAGAGAATGAGATGCGTGGAAGAAT
CTTGGAAGAGTGGATCTTAGTGAATGGCATGATTGTTTTGAATGAGCCGAGTGAGTACTA
TACTTTCTCGGGCGTGAATGGTGTGAGTGATATAGACGTGACGTTGGTGAATGTGATGCC
T
>LINE_comp3597_g2_i5
ACGTGTGCTCTTCCGATCTGTTGACTGAATGTAGTGTGTATGAGGATATGAGAGACCTGA
GTGAATGTGGAGTGATTGTAAAATGTTGACGGTAGTGTGAGTGTGAGTGGAGTGTCAGCG
TGTAAGGCAACGTATGAATATTTCAGTATGTTTGCGAAAATGATGTTTGAAAGAAGAAGA
GCGCTTGTTAGAGTAAACGTGTGAATGATGTGCCGAGGGCGCAGGAGGGCTGCCGGGCTG
TAACCCGGAGGCCTTTGGGGAGTAACGACTCCACGTATCCGAGTTGGCTTCACCCAAGTC
GGGGCTTGCAAGAGTCCCAATGGGAAGTGGATAAGTTCCACGACAGGCAGACCAGTACGG
GGGGGGGCGTGTCGGTGAGGGTTTTCCTTTCCTAGGGGATGATGGCCAGGCTTGCCCACC
GGTGTGTGTTCTCTTCGGAGACGCACCCCGGGACGCGGCCCGGTACATTGTCTCCTCGGA
GGGGTCAAAAACCCGGATGAATCTGATGATTCTCTGAACCTTATGGTACTTACCTTCGGG
TACTTACCTGGAGGAACGAGTTTCTTCGGAGAAGTTCGGGACCCTCATCGACGGAAAAAG
GTCCACTCACTCCACCTCCTCGTGGGGCTCCCTGGGACTCTGTTCCGGTGGCTTCGGCTA
TCTGAAACAGAGTGCGAACGGGGTGAGATGGTCGACCAACTTCCTCGAAAGAGGGGGCGT
ATAACGTAAACCGGTGGTCATGTTTTACCGGAACGGGGGTCTTGCCTTAATCGGCTGGGC
AGTGAGAATGACAACCTCTATAAAAAATCTCTGCCTCAAGTTCCGATTCGTGGCAATGGA
GCTGTTCCAGATATTACACTACTCGCCAGGGGGTGGCCAGCGGGAGCGCCGGTGATGAAT
GACCAACCTCCGGGGCGTGGCGCCCCCGGTTGATGTGGAGCCGTCCGCATTGAGGAGGGG
TAAAGTGCAGGGTCCTGTTCTCCCCCCACTAATATTGATAGGCCACCGGACCCTTCGGAG
AATGGAGGCCGTATATGAAATAATGAATAAAGCACCTTTAACGAGGAAAAATACGGATAC
CGAAAAAAAGGAATGAAACATGGCAACGAAAAAGGACACGAAAATGGGAGACGAAGAGGA
CAAGAAGACGGACTGTGTAGGGCGGCCTATAAAGGAGGTGACCATTACTATGGTGGAAGG
CTCTGGTATGAAGACCAGGAACAAAGCTCACGCTCCGACTGGATCGGACAAGAAAGAGGA
AAGGGTGGAGATTTTTACTCCGCGCGTCTCAACAGGACGCCACCCCGCGGAGTTAGACCC
GTCATGCGTAAAGGTGCTAGAGAGGAGAGAACGGAGTAACTCCGTTCTCCGGAGATGGCG
AGGGAAAAGCAAGAAAGGACGGAACACGCGAAGAGGATGAAAGCCCCGACGCTAACCTTA
GAGCTCGACCATACATTGATAGACGGGAAGCAACCCGATGTAGTTACCGCTGGTCAGGAG
GACGCTGAAGATAGGGGAAGCGACACTTATATCACCCCGCAGCTTCAGGAGGCGATATTC
TGAAAACCCGTAAGAGCAGCTGTAGTTCTCAAGGGTACGGAAGATCTCACGTTTAACAGC
GAAGACAAACCAGGGGACAACGGGCTTACGCGCATACGTAGAAAGTCACCCAATATACGT
GGTGGTACAGACGGTCGAGTGAAGCGTGCACCGAAGCCGATGGTTTCAGGTGAGGCCGAC
AAAAATGTGAATGGTACCATCGCGCATCTGGTGGAAGAGATGCACAAAACGATTCGCTTG
CTGGCCAATGGACAAGCAGGAGCAGGAAGCCATTGGGAGGCATTTTGAGACCATTAAGGG
AATTGTTTCCGGAATCACCAGAAACAAGAGGAAGTTTGAATTGTCACCGTCCGCGGTGAA
TAATGAAGAGAAGGGAGCAAGAACTGAGGCAACGAGGGATGAAGAGGATACGTGAACAAA
GGTGACTAGCAAGAGAAGAAAGACACGGCGGCAGCACCAGCGGTGGACGGGACGGAATTC
CCTCCCTTACCTACAAAAAACGCGGCTAGGGGCACACACAATAACACCGAAAATCGGATG
AAGAAGATAATTAATGTGGAAAAAAGCCCATATGAGTAGGTAAAAAGACCGGCAGGCGAA
TCAAACACAAGTGTGAAGCGATTGTCATACCTTCTAAAGGTGATGAAAAAAGCTACGTTG
AGATCCTTAGGAAATTAAGAGAGGGTAACACGACCTCTTCCCCCTTATACGGGATCAAGA
AGATCCGAAAAAACAGAAACGACTCTGCATTACTGGAACTAGAGAAAGAGACCAATGCCG
AAAAGGTACTTGAGACGATTAAGGAGAAAGTTGATGGGGTAAATACGAAGAGGCTGCAGC
CCATGACCCTCGTGGAATACCGAGACGTGGACCCCACGGTGATTCTAGAGGAGGTCAAAG
ATGTCGTCAATGGAGTTATTGATCCCAACTCGAGCACAGACATCAGGATTAGGTACCTAC
CCAGAGGAACCAAGGTTATTAGGGTGATTACGACGACTGTAAATGAAAAAAGAACGCTTG
GCTTTTGGATTGACTTCTTCCACACCAAGGAACTTACCAAGAGTGAACAGATGTGTCGGA
GTGAACGGTGAAAGATTATGCCGGAGATGCGGTCTGGTCGAACACTACGCCAATGAGTAT
AGTGCAACGTAGAGTTGCTACATTTGTATGAAAGCTGGACTTGGAGAAAACAGGCTGGTA
CACCTTGCGGGTGGACCAAGATGTCCAGCCTATAAAGAAGAAATGAGAAGGGCACAAAAT
TCAAGATAGTCCAGATCAACTTAAATAGTGTAGAGTTGCACATGAGCTGTTGCAACAAGC
GATGGTGGATATAGATAGTGACGTGGTGGCCATAAGCGAACCCCTATTCAACAGGAAACC
CTAGTGGCACGATAATGGCAAGCACGAGTCGATACGGGCTCCAAACGAGCAATTCAGAAA
GAGATGCTTTAAGGAATTTGCCATTGAAGGGGCGGTGGCTATGTTGACTGGAACATACAC
TACTGTATCGTGCTATCTGCGACCTAGCTTGTCCTTAGAGGTTTACGAGAGCAAGCTGGA
GTGCATCGCCACGTGCGGTCCTGAGAGCCATATAATGAGTGACTTCAATACAAAGTCCAC
CGCCTCGGGATCCTCGCTTACAGACCCCAGGAGTAGGATAATGATGGAATGGGCGGAGCA
AGTTGGTGTGATTCTCCTGATTGCTAAGGGTGGACCCACCTTCTCACGAAACGGGCGCTC
CACTACAATCGATATCACTTTCACCACTGTTGCATTGTTGCGCAAATGAAAATCTAGCCA
AGTCCTAGAGACTTACTCGAGATCAGACCATAAATATGTGGCCCACACGATCGATACCGA
CAAGATCGCAAACGAACTTGACAAGTGGACGGTGACTCCTCCTACCAACGTGGGACGTGA
CATGAGTGCATCGAAAATCTTCATTCGGGTTTCGATGCGGCGTTTATACCTGTCCTCAAA
GGATTGTGTAATAAGGCGGGCGATCCTTGGTGGAATACAGAGATTGCACTATGAGAGCGA
GGAATCTGTACTCTAACGCGAGAAAGAGGGGGACAGAACTGAACTATGACGGGCCGCTAT
ACAGTGACTGTAGGAGAGAAGTTATGATCGTGATCCTTAGGGCCAAGGAGAGGTGGTGGA
GGGCAATGTGTGACGATGTCGAGAAAGATAAATGGGGAAAACCACATAGGACGGTCATGA
AAAGCATAAAGTCACCTATGCAAGCCAAAGACCTCACCTGAGAGGAAGCGGAGGTCGAGA
TGAGTAAGCTCTTCCGCATTACTCCACCAGATGACGAACATCCTGAGGCAACGGTAGGCA
CCACTGAACTGAAACTTGAAGAGGACGCGCTGACAGTGATGAGACCGGAAAGTATAGAAT
TATATTAAAAATGCTTTCAAGTCGATAAGAAGAAAGCACATCTGCGACATTATCGACAGG
AAACGTTTCCCTATCTGGCTGAGATGTTTACTCAGAAATTACCTTACAGATAGGGAGATC
CTGATTAACACTTTAGACCGAGGGCAGATGCGTCTGGGCGTTTATGCAGGTGTCTCACAG
GGGTCGGTCATCGGACCCCTGTTATGGATCATCTGGTACGACGATATACTAAGGCTGCCG
ATCCCCCGAGATATCACGCTCGATGGGTATGCCGATGATCTGATAGTCGTCATCACTGCC
AGGGACGTTCAAGAGGCCATCGCCATAACCAAGAACACCGTGGGACGCATAAGGAACTCG
ATGACAGGTGCTGGGCTGCAGCTGGCAAGTGAGAAGACTGAGTTGACGCTTTTCACTGGC
AGGAAAAGAAGAACTCCTGTATGCATCAGGGTCGGATGCCAAGAGATCGGAGAGGCAAAG
GAAGGAAGTAAGCAGGAGCCTCGCCAACCCTAAGGCCAGTTCTACCGGCCTCTTTGCCTC
TTTCCCTCTTCCTGACCGAGTGGCTGAGTAATCCGTTCGGCGAGGGGCGAC
>LINE_comp3597_g3_i3
CGGCCCCCCGCGGGACACCAGGCGAATCCCGTGTGTAGTAGCCCTCCCCGTGGGAATGGG
CGTCACCCCACGGGGTGACCTTTGTTCGACCCTACTCGTGGGATTTCTTATGGACCGCAA
ACTTAAACTTGGGGATATATTGGGGGGAGATGTTGAGGAGGGTGGGGACGTCGAGATGAC
GCCCCAAAGTTCGAGGGGGAGAGGTGTCGCGGGTTCATCCCGTAGCTTAAGCCCTGTGAG
GCGGGGGAAGAGAGTGGCCACGGAGCCTGCAGCAGGCGGAAGTGGCAAGAGTGTGTGTGT
CGGTGTGTCTGAAGAGTGTGAGAGTGTGAGTGAGGTTGCGAAAATGCGTGTGATTGGAGC
GAGACTGCGAAAATTTGTGTTTGCTGAAAGTAATCGCGTAAACAAGAGTGTGAGTGAGTA
TGTTCTTAATTGTGTGTCTGAGTATGAGGAGATCCTGATTGATATGATGCGTCAGAATGA
ACGGTTGCGTGGTCGGTTGGACGAGTGCGATAAAAGAGAGAAAGAGAGAATGACCAGTCC
GGTTGTGAGTGCGAGTGTGTCGTACGCGGCCAAGGCTGCGAAGAGTGCGACAGGTATGAG
TGAGAGAGTGTCTGGTGGATCGAGCCAGAGAGCGAGTGAGAAACAAAAATCGTATGCTGT
GGTTGTGCGTGCGAGAGATGAGAGTGTGAAAATGTCGAGTGATGAAGTGAAAGAGAGACT
GATCAAGAATGTTAGCAAAGATTTGAATATAAGGGTGCGTGCGGTGAGGAAGACGAAGAG
CGGTGGCCTGGCCATCGAAGCTGCGAGTGAGTGCGAGTTGAAAGTGTTGAAAGAGTGCAA
GAAGTTTGCTGATTTGGGGTTGAAGGTAGAGGCCCCGAAGAAGATCGGACCTAAGGTCAT
CTTGTTCGATGTAGAGAACGAGATGACAAATGAGGACCTGTTGAATGAAGTGTATAGTAA
GAATTTTAAGAACGAGAGTGTGAGTGAGAATGAATTCCGTGAGAGAGTGCGTGTTGTGAA
CCGAATGAATCGAAAGGGTGTGAATGTAGGGAATGCAGTGTTAGAGATGACGAAGCGTAT
GCGTGATATTGTAATGAATGAGGGAAGAGTGTACGTTAAATGGCGTGCGTGCAAGGTGGA
AGATTTCGTGAATGTGTTGAGGTGTTTCAAGTGCTTCGCGTTCGGGCACATGATGCGTGA
GTGTAGCATGAAAGAGAGATTGTGCGAGAAATGTTGCGAGAGTGGGCACTTGAAAGAAAA
GTGCAAGGGTGAATGCGTGTGTAGGAATTGTAAATTAAGGGGACGAAAGGGAGACCACTC
GGTCATGTCCGTCGAGTGCCCGGAGTATGTGAGAATGATAGAGCGTGAAAGGATGCGTGT
ATGCGACGATTAGTCAATGTATGAATGTTTTGCAGATGAATTGTCAGCGTGCGTATATGG
TCATGTGTGATGTGAGCAAGGTTATGTGTGAGAAACGGGTGAATGTTGCATTATTGCAAG
AGGTGTACGTGTATAATGGTTGTGTGAAAGGGCTACCGTCGTCCTGGCGGGTCTTCTTCG
ACTCGGAGGAGCCCGGGAGGGCGGCGGTGGTCGTTGCGAATGAGAACTTGGATGCTATGT
GTGTGAATGAGCTAACGTGTGAGCTTGGTGTGTGTGTGTGGATTCGAGGGGACTTTGGTG
AAGTGATTGTGGTCTCCATGTACTGCCGATACGGCCGAGATCTCGACCCGTATCTGGCGT
ACATGGAGCGTGTGAATGAGTTTGCTCGTGGTAAAAGTGTGTTGTACGGTATGGATGCGA
ATGCGACCTCCCCCTTATGGTATAGTAAGGGTGGGGGTCGCAGTAGAGAGAATGAGATGC
GCGGACGTGTTATGGAAGAGTGGATTTTAGCGAATGATATGATCGTTGTGAATGAGCCGA
GTGAGTTCTATACTTTCTCGGGCGTGAATGGTGTGAGTGATATAGACGTGACGTTGGTGA
ATGTGATGCCTACCGGGTGCCGTTTGGAATGGGAGGTGAAGAGTGAATGGGGTATAAGCG
ACCATAATGCGGTCCTTATACGGATTTTGTATGGTGCGAGTGATGAGGAACGTGTGAAGG
TTGGTAGAAGATGGATATGTAAGGATGTCTGCTGGGAAGAGTATGCGAATGATCTGCGTG
TGATTGCTGAGCTGAATGGGAGTGAGTTGATTTGTGAGCCGAATGTGGACAGAATGACTG
ATACACTTATGGGCTGGATCCAGGAGGTGAATGGCAGGTACATGAGGGAGAGTAAATGCA
GGAGCGATAGAAAGGTTGTGTGGTGGACGAGTGAGTTGACTGCCCTTAAGGGCAGAGTGC
GTAAGAGCCGGCGTGAATGGCAAAGAGCGAGAAAGAGAGGCATGAATGATGATGTGAAAT
TGCGAGAGTATAAGAGAGCGTTAAATGTATATAAGTATCGAATGAGGAGAGTGAAAGAGG
AGAACTGGAAACAGTTCTCCAGAGTGTCTGTAAACCTGGATCCGTGGGGCCCGGTGTATA
GAGTATGCCGTGGAAAGAATGCGAGAGAGGGAGTGAGTGCGTTGAGAGTGAATGATGTTG
TGTATTCTACGTGGAAAGAGTGTGCGAATGTCTTGTTGGAATGGTTCTTCCCAGCGACAA
GTATGCAAGATGCAAGTATGAATGATGGAATGCGGAATGATATGAATGAGTCTGTGAGAG
ATTTTGAATGGGATGAGGTGAATGCGGCCGTGAGGAAGGCGAGATTGGGCAAGGCACCCG
GTTTGGATGGTATAAATGGTGAAATGTTGCGAATGATATGGAGTGCGATTCCGGGATGGA
TGTTGAGTGTTTATAATGCATGCCTGAGGAGTGGTTGTTTTCCGTCTGTGTGGAAGGAAG
CGCGTCTGGTCGTTATACCAAAGTCCCCTGAGAAGCCGCGAACGGACCCTGCGTCGTATA
GACCTATTAGTTTATTGCCCGTGTTGGGGAAAACGCTGGAGCGAATGATGATTGCGCGAT
TGGAGAACAGAGTGAATGCGAGTATGAATGAGGCCCAACACGGGTTTCGCGGGGGCCGTT
CGACGGAGAGTGCATGGATGAATGTTAAGAAGTATGTGAGAGAGTGTGATAGTAAATATG
TTCTTGGTGTGTTTGTGGATTTTAAGAGTGCGTTTGATTGTTTGGAATGGATGCGTGTGA
TTGAGAAATTGTGTGAGATTGGTTGCGAGGAAGTAGCTCTTTGGAGGAGCTACTTCCAAA
ACCGCAAGGTATGTATGATTAGTGTAAATGACGTCGTGTGGAAGAATGTTGAAAGGGGCT
GCCCACAGGGGTCCATCTGTGGTCCGTTCATCTGGAACTTAATGATGGATGGGCTCCTGT
GGCGGTTGAGTGAATGCGGGTGTAAATGCGTTGCGTACGCTGACGATTTGCTGTTGCTTG
TAGACGGACAGAGCCGAGTGGAAATTGAGCGAAAGGGGAGTGAATGGATGAGTGTTGTAT
GCGAATGGGGTATGAATGTTGGTGTGAGGGTGTCCGAAAATAAAACCTCGGCCACCCTCC
TCAAAGGTCGTGTGAGTCTGACGAGGTGCCCGAGCGTGAGAATGAATGGAAGAATGGTTC
GTTACGCGGCGAAAGTGAAGTATTTGGGTATATGGATGAATGAGAGAATGAGTTTTAAAG
AGCACTTGGAACACCTCAGAGTGAGAGTGATGAATGTTGTGGGT
>LINE_comp3597_g4_i2
TCGGTACGCGGCGAAAGTGACGTATTTGGGTGTATGGATGAATGAGAGAATGGGTTTTAA
AGAGCACTTGGGACACCTCAGAGTGAGAGTGATAAATGTTGTTGGACAAATGCGGCGAGT
GTTGAAGTGTGAATGGGGTATGAATAAGCGTGCGGTGAAAATTGTGTACAAGGGTTTGTT
TGTTGCGACTGCGTTGTATGGATCGAGTGTATGGTGCGAGTGTATGAAATTTGGGTATGC
GCGTGATCTGTTGAATAGGTGTCAGCGTATTGTCTTGTATGCGTGCCTAAATGTTTGTCG
TACTGTGTCGAGTGAATGTATGCAGGTCCTCATGGGGTCTCTACCTTGGGACCTGGAGTG
CATGAGACGAGGTCTAGTGTGTATGATTAAGAATGGATGGGAGTTGTGTGAGAATGAGTT
TGTACGGATGGAAGAATTGAGTGAAAGGTCTTTGGATGAAAGAGTGGACCTCGTGAATGA
AAGAGTATATGCTGGATGGCAAGCCAGATGGAATGAATGCGTGAATGGCAGAGTGTTTTA
TGAGTTTATTAAGGATGTGAGATTTGGTGAATGTGTCTGGTTTGATCCGAGCGTGTATGT
ATGTTTCTTGTTGACTGGGCATGGAAGCATGAATGGATTCCTGCATAGGAGAGGGTTGAG
CGAGAGTGCAAGATGTGTGTGTGGTTGTGAATGTGAAGATTGGAAGCATGTGTTGACTGA
ATGTAGCGCGTATGAGGATGTGAGAAACCTGAGTGAATGTGGAGTGAGTGTTAATGATGA
TGGTAGTGTGAGTGTGAGTGGTGTGTTGGAATGCAAGGCTAAGTATGAACGGTTTTGTGT
GTTTGCAGCGAATGTGTTTAGAAGGAGAAGAATGTGTCTGAGAGTGAATGTATGAATGGG
TTTCTCAAGGGCGCAGGAGGGCTGCCGGGCCAGTT
>LINE_comp3597_g4_i3
GAACTTGGGTGCGAGGAAGTAGCTTTATGGAAGAGCTACTTCCGAGACCGCAAACTATGT
ATGATAAGTGAGAATGATATAGTATGGAAGAATGTTGAAAGGGGCTGTCCACACGGGTCC
ATCTGTGGTCCGTTCATCTGGAACATAATGATAGATGGACTCCTGTGGAAGCTGAGCGAA
TGTAATTGTAAGTATGTGGCGTACGCTGATGATTTACTGTTGATTGTGGAGGGGCAAAGC
CGGGTGGACATTGAGCGAAAGGGGTGTGAATGTATGAATATTGTATGTGAGTGGGGTATG
AATGTAGGCGTGAGGGTGTCTGAGGGTAAAACCTCAGTCACTCTCTTAAAAGGCCGCGTG
AGTTTGACGAGGTGTCCGAGTGTGAAGATGAATTGGAAGGATGATAAAGTATGCAGAACG
TATAAAGTATTTGGGTGTGTGGATGGGAGAGAGAATGAGTTTTAACCCTCACCTGGAGCA
CCTTAGGATGAAAGTGATGAATGTAGTTGGGCAAATGAGACGTGTGCTAAAGTGTGAATG
GGGAATGAAAAAGCGAGCGGTGAGAATGGTTTACAAAGGAATGTTTGTCGCGTGTGCATT
GTATGGATCGAGCGTGTGGTGAGAATGTATGAAATTTACGTATGCGCGTGATACGTTGAA
CAAATGTCAGCGAATGATGATGTATGCCTGTTTGAATGTCTGTCGTACCGTGGCGACAGA
AAGTATGCAGGTCCTCATAGGGGCCCTACCTTGGGACCTTGAGTGTATGAAACAAGGTCT
GGTATGTATGATTAAAAATGGATGGGATGTATGTGAGAATGACTTGGTGTGCATGGAAGA
TTTGAATGGGAAAACCGTGGATGAAAGAGTATATGCTGGATGGCAAGCCAGATGGAATGA
ATGCGTGAATGGCAGAGTGTTTTATGAGTTTATTAAGGATGTGAGATTTGGTGAATGTAT
CTGGTTTGATCCGAGTGTGTATGTATGTTTCTTGATGACTGGACATGGAGGCATGAATGG
ATTTCTGCATAGGAGAGGGTTAAGCGAGAGTGCAAGATGTGTGTGTGGTTGTGAGTATGA
GGATTGGAAGCATGTGTTGACTGAATGTAGCGCGTATGAGGATGTGAGAAACCTGAGTGA
ATGTGGAGTGAGTGTTAATGATGATGGTAGTGTGAGTGTGAGTGGTGTGTTGGAATGCAA
GGCTAAGTATGAACGGTTTTGTGTGTTTGCAGCGAATGTGTTTAGAAGGAGAAGAATGTG
TCTGAGAGTGAATGTATGAATGGGTTTCTCAAGGGCGCAGGAGGGCTGCCGGGCCAGTT
>LINE_comp3604_g11_i11
GATCATCCTTTGTATAAAAAATATGGGAAAACTTGAATCTATTTTATGCAACTTACAAAA
ATTGCAGGTTAACCACAGTTTTGACACCGGTCGGACTGTAATCAACGTAAGTCATGTGTT
CGTGCACGCTGTCCAGGCAATATTAGTGGACGTGGCGTAACACTTTCACACGCCGAATTA
ACCTTGTGTGAAATAGTTGTGATGATGAAAAAAGGCTTCTCCTTTTCTCGTTCGAAAGTG
GACTGTATTTGTTGAATAATGAGTGAAAGGAGTGTGTATATGTGTACAAATATATATATA
TATATATTCTCAGATCCGATCAATTTTTCAAATACCTACTTGGTGCTGCAAATGTCTTTC
AAATTTCTTTTT
>LINE_comp3605_g1_i1
GGGGCTCTTCGCAGAGCTCCTCGTCCGAACACCGTGGATCGGCTCTTTAAACGTGTCCCG
TCTCGTGTCCTTTGTCCTCGCCTTGTCGTCATCGCTATTCCCGTCCGTTTTCTTCGGTTT
AGTTTTAGGCATCTTTTTCTTACCGATGCTTTTCGGGTGGCGGCATACCGACCCTACTCG
GCATCGAATTCTTATAAATGGGGGAAGGGTAACCGCGCGCTTTACCCACCATACACGCGC
AGGGCTAATACCGCCCGGGGAGGCCATCCCCCGGGGGTTGTCGCACTAACGACCGGCGCA
CCCGCCGGCCACCCCTCGGCTAGTAGTGCAAGGCCGAGGAGCGCCCCCTCGCCGTGCGTA
CACAGCTTAAGGCTCGGGATTTTTTATAGAGGTTGTCA
>LINE_comp3605_g2_i2
CACACACGTAACATACTTCATACATTTATCATTCACACGTACATTCGGGCATCTACTCCT
GGCCAAGCTTCCTTTCAACAACATGCACACACTCTTGCTCTCAGAAACACTCACACCCAC
TTTCATTCCCCATTCACTCACAGTTCTCATCCATTCCGTTCCCTTTCGCTCTAGATCCAT
TCTGTTACGTCCTTCCACAATCATAAGCAAGTCGTCAGCATAAGCCACGCACTTGCATCC
ACATTCACTCAAAGCCCACAGGAGTTCATCCATCATAAGGTTTCATATGAATGGACCTAT
GATGGACCCCTGTGGGCAACCACGCTCAACATTTTTCCAAACACGCTCATTCGCACCTTC
CATACATACAACACGATCCTTAAAATAACTCATCCATAACCCAATTTCCTCGCATTCTAT
CTCATTCAGTTTCTCGATCACACGCTTCCACTCTAAATTATCAAACGCACCCTGAAAGTC
CACAAACATACCCAACACATATTTACATTCACTCAGCTCCACACACTCTCGGACTTTCGG
ACCCCTCCTAAACCCGTGCTGGG
>LINE_comp3605_g3_i1
CTCACTCATATATCCATCCCAATCTACCCCCTTGCTGGACCACCTCCTTCCGGCACGCAT
AATGTCATCACATTCATTCTCAAAACTCACTTTCACACTGATGACATTATGATCGCTCAC
ACCCCAGTCACACTTAATCGTCCACTCAAATTGACACCTGGCCCAAGCCTCATTCGCCAG
AGTGATATCAATATCACTCTGC
>LINE_comp3605_g4_i1
CACACAGATCCTCACGCACACCCAATTCACCTTTCGCATCATCATTCACACTTCCACATT
CACTCATCATATCGCATTCACTCACATCATCCCCATCAGCCTTCCTCCTCTTGGATCCGG
CACTACTGTCTCGGCTATTCCGACGCCTGCGGACGCTCACGCTACGGCTCCGCGATGTAC
TAGGAGCATCAGCCTCCGCCCTGCTGCTCCGCGACACTTCCTCCACCACCTTCTTCTCCT
TTTCCTCACCCTTCACTCCTTTTCCTTTCTCCCCCCCAGCCCCAATTATATTTTTTAAAG
TTATTTTTTTACTGCTCATAATAAGTCCCACGAGTTGGGACGATCTAACATCACCCCCCC
GGGTGACGCCCATTCCGAGGGGGAAGGCTACGTACACACGGGATGCGCCTGGTGTCCCGC
GGGGGGCCGCTAGAGACCGGTGCACCCACCGGCCACGTATCCACAGTGTTAGTGCAAGGC
GGATACGCGCCCTTCGCCGCGCGCCATAGCTTGAGCAAGGGATTTATTATAGAGGTTTAT
CTCCTCGCGGCCCAGCCGGTTAAGGCAAGACCCCCGGCCGGTCTGTCGCGCGTACCACCG
GGACAGAGGGTTATTAGGCCCCCTGGCCCGGTGGGTCGTTGCTAACGACAGCCGGTTACG
GTATGCGAGTGCTCGGGAACCCCGGGAGCGCAAAATCCCGAACCGCCATCTACCGGCGGC
CCCTGGGGG
>LINE_comp3605_g5_i1
CACGGCGGCCTTTTTGTGGCCCACGTCTGACACATACACATTCATACTTAAGGGCAAGCC
CTTTACACATCCATCCACGGCTACATACGGCTCTTGTATAATAGCCACACTCACTCTCTT
CTCAATCATCAACACACCCAAATCACACATAACCGCATACGCTCGTTGACAATTACACTG
GATCGTATTTATCACACACTCAGCCATTATTCCATGCTAATCCTCGCACGCTCACGCTCA
ACCATACGCTTGTACTCGGGACACTCTAAGGACGTCACCGAATGGTCACATTTATTCCCT
CGCAACTTGCAGTTTCTGCAACATTCGCTCTTCTTACATGCACTCTTCATGTGGCCTGCG
TCGCCACATCTTTGACACAAACTCTCCTTTTCCTTGCATTCCTTGGCCATATGCCCGAAT
>LINE_comp3605_g6_i1
ATTCACACACCTATTACCCCTCTGTGTAGCCGGGAAGAGGGTGTCCAGCAGGACATTCGC
ACTCTCATTCCATGTATCCGTCATTCTTCCATTCACATTCATTGTACACAATCTCTCATT
CCCTTTCTTACCACGACAAATCTTATACACTGATCCCCATGGGTCCACATTGCTCCATTT
ACTCACGAACTGTTTCCAGTTCGTCTCTTTCGTTCTACAAATCATTCTCTTATATTCATT
CAATCTTCTCTTATACTCATCCTGCATCACGCTAACATTCTCTCTTCTCTTTCTCGCTCT
TTGGAATTTCTTCCGCAGTTTCCTTACATTCCTCTTCATTCTTTCCAACTCTTTCGTCCA
CCATGCAGGCTTCCTTTCATTCCCTTTCTTCAATTCTTTCATTCTCCTTTCATTCGCAAT
GTGGATCCATGAGGTCACAGCATTCACCAATTCATCCGCGCTCGCACTCTCACTCACATT
TATTCCATTCATTACCGCACATTCTTTCACTTCACTCATATACGCATCCCAATCAACACC
CCTGCTGGACCACCTCCTCCCGGCCATCGCAACATTCTCACACTCATTCACACAGCTCAC
TTTTATG
>LINE_comp3605_g7_i1
TACCATTCACATTCATCGTACTCATTCTCTCACTTCCTTTCTTTCCTCTACACACTCTAT
ATACAGTACCCCATGGATCCACGTTGCTACATTTATCCACGAACTGTCGCCAGTTCGACT
CTTTCACTCTGCATATTTCTCTCTTATACTCTTTCATACATCTCTTGTACTCGTCCTGCC
ATTCGTTCACATTCTCTCTTCTCTTTCTCGCTCTCTGAAATCTCTTTCTCACACGTCTCA
CATTCCTCTTCATTCGCTCTAGCTCTCTCGTCCACCACACAGGCTTACTTTCACACCGCT
CCTTTATCACTTTCATACGCCTATCATTCGCAACGTGAATCCATGAGGTCACACAATCCA
CCAATTCATCCACTGAAGCACTCTCATCAACATTCATACCATTCAAAAACGCATACTCTC
TCAGCTCACTGACATACCCATCCCAATCAACACCCCTGCTGGACCACCTCCTCCCGGCCA
TCGCATCATTCTCACACTCATTCACACAACTCACTTTTATACTGATCACATTGTGATCAC
TCACTCCCCAGTCGCTCTTCACATCCCATTCAAACTGGCACCTGGTCCACACATCATTCA
CCAGAGTGACATCAATGTCACTCTGCCCATGCACACCCGCAAACGTAAACCACTCACTCG
GCTCATTCAACACACGCATTCCATTTCCAATTATCCAATCCTCAATCATTTCTCCACGCA
TCACATTCTCTCTAGAATGCAGGTCGCCCTTGCTA
>LINE_comp3605_g4_i2
GGGGGAGGTCGCATTCGCATCCATTCCAAACAGCACTCGTTTCCCATTCGCAAACGCATT
CACTCTGTCCATGTACGTCAGGTAGGGCTCGATTTCTCGGCCATACCGACAGTACATGGA
CACCATTATGAGCTCCCCGAAATCCCCTCTTATCCACACACATACACCGAATTCATTCGT
ACACTCATTCACGCATACTACATCCAAACACTCATCACACACGGCCACCGCCGCCCTGCC
GGGCTCTTCCCCACAGGAGAAGACCCGCCACGACGACGGTAGACCTCTCACACACCCATT
AGACACATACACTTCTTGCAACAAAGCTACATTCATACCTTTTTCACACATCACTCTGCC
CACATCACACATTACCACGTACGCACGCTGACAATTCAGCTGCAAAACATTCACACTGCG
ACTAGTCATCGCTGATTCTCATTCTCTCTCTCTCAATCATTCTGACATATTCCGGGCATT
CCGGAGACAGAACAGAGTGGCTCGATTTGTTTCCTTTCATTCTGCAGTTTCGGCATACAC
TCTCACTTTTACACTTTTCTTTGAGGTGCCCACTCTCACAACACCTCTCACACAGTCTTT
CTTTCATACTACATTCTCTCATCATATGACCATACGCATAACATTTAAAACACCTCATCA
CATTCATAAAGTCTTTCGCTTTACACGCTCTCCACTTCACATACTCACTTCCTTCATTCA
TCACAATATCTCTCATACGCTTCGTGACCTCAATGATCACATTTCCCACATTCATTCCCT
TCTTGCTATTTCTGTTCACTACTCTCACTCTTTCTTTAAATTCTGTTTCACTCACTCCCT
CATTCTTAAAGTTTTTAACATACAGCTCATTCATAAAATCCTCACTCGTCATCTCATTCT
CAACATCGTAGACCATAATTTTTGGGCCCACTTTCTTGGGGGTCTCCACCTTGAGACCCA
ACTCACTAAACTTCTTGCACTCATGCAGCATTCGCACTTCTTTCTCACTTGCAGCCTCGA
TGGCAAGCCCACCACTCCTCGTCTTTCTCACTGCACGCACTCTAATATTAAGGTCCTTAC
TCACATTTTTCAGGACCTTTTCTTTCAGTTCCTCACTACTTATTTTTACGCTTTCATCCT
TCCCTTTCACTACCACAGCAAACGTTTTCACAGGCATACTAGCTTTCGCACTCACACTCA
CTCCTGGTTTTGACCCAGCAGTCACTCTCTCACTACTCTTTCCCACAGCACTCGCATAAC
TCACTTGTCGTACACTCTCACTCATCCTCTGGACATTCATATTCATTCGCTCAGCATTCT
TTTCACATTCATCCAACCTTCCACACAGCCTCTCATTCTCTCTCAACAATCGCACAAGCA
CTTCCTCATACTCACTCACGCAATTCATTAGGAACTCACCCTGTGTTTTCGACACACGGT
TAGCCTCCGTAAACACATACTTCCTCATTCTCGCCGAAATCTCACGCATTCTTTCCTCAT
CGTCTCTCTCACGCACACTCACACTCTTTTTCGCAGCCATTCCAGAACTCTCCCCCACAT
CGGAAGCCGTCCTTTTAACTCTCTTCGCCGGGCTGGCGCTTCTGGATACTCCCGACAAAG
CGCGTCCCTTCTGCGAGGGTGGACGCATCTCCACCTCTCGCATATCTCCCCCTTCGTCTT
TACCCCCCAATATATCCCCGAGTTTTAAATTTTTATCCATAGGAATTCCCACGAGCTGGG
TCGATCTAAAGGTCACCCCTCCGGGTGACGCCCATTCCGGAGGGGAAGGCTTCTACAATG
GGGTGAGCCAGGTTCCCCAAGGGTGGCCGCTAGGGACCGGTGCACCCACCGGCCACGTAT
CCACAGTGTTAGTGCAAGGCGGATACGCGCCCTTCGCCGCGCGCCATAGCTTGAGCAAGG
GATTTATTATAGAGGTTTATCTCCTCGCGGCCCAGCCGGTTAAGGCAAGACCCCCGGCCG
GTCTGTCGCGCGTACCACCGGGACAGAGGGTTATTAGGCCCCCTGGCCCGGTGGGTCGTT
GCTAACGACAGCCGGTTACGGTATGCGAGTGCTCGGGAACCCCGGGAGCGCAAAATCCCG
AACCGCCATCTACCGGCGGCCCCTGGGGGGAGTAGATAGGGACAGAAGGAATCTCGTTAA
TCCATTCATCCGCGTCACTAATTAGATGACGAGGTATTTGGCTATTATTATTATTATTTT
TTTTTTATAGAAGAAAAAGGGTTTTGGCTTTTAGGAACTAAGCCCCGTCCTAAATGTTTG
TCGACCGGTAG
>LINE_comp3605_g4_i3
GCACTCAGCCATTAATCCATACTAATCCTCGCACGTTCACGCTCAATCATTCGTTTGTAT
TCGGGACACTCCAAGGACGTCACCGAATGGTCACACTTATTCCCACGCAACTTACAATTT
CGGCAGCATTCAGTCTTTTTACACGTATTCTTCATGTGGCCTGCCTCACCACATTTTTGG
CACAAGCTCTCCTTTTCCTTGCATTCTTTGGCCATATGCCCGAATGCACCACACTTATGA
CATCTAAGCACACTCACGAACTCACGCAGTTTACACGCACGCCATCTCACATACATACGT
CCTTCATTCATCATCTTGTTATACATTCGCACACTCATTTCAATCACGACATTACCCACA
CTCGCATCTTTTTTATTTGTACGGCTTACAACACGCACACGCTCAGCAAATTCTCTCTCA
CTCACACATTCACTCAAATTCTTCTCATACAGTTCCTTTAACAACTCATCACTCGGTATT
TCACACGGCACATCATATACTATCACTTTCGCACCAATTTTCCTCGGTTCTTCAACTTTC
ATTCCGATAGACTCAAATTGCTTACATTCACGCATAATCTTGACCTCTTTCTCACTAACC
GTCTCGACGGCTATCCCACCACTCCTTGTCTTTCTCACCGCTTTCACACGCACATTCAAC
TTCTTGCTCACTTCATTCAAAACTCTTTCTTTCACTTGGTCGCTACTAAGCTTTAGGCTC
TCGTCCTTTGGCTTAATAACGACCGCATATTTCTTCTCACTCACTCTCATCACCGGCACA
TTCACACCAGATTTCACATTAACACTACTCTTTGCATTCACTCCAGCAACACTCGCGAAA
CTCCTTCCACTCACACACACACTCTGGACGGGCACAGATTCATTCTTCTTACATTCATCC
AATCTTCCTTTTAGACGCTCATTCTCACACATTAATCTGACTAAACACTGCTCATACTCA
CTAACACAATTCAGTACAGTCTCGCTCACACCTTTCAACACACGACTTCCCTCAGCAAAC
AAACATTTACGTAGACGTTCACCTATCTCTTTCATACACACAATCTCACTTTTCTCATTC
ACACAATCATTTTCACGAACAATCGTCATTGCACTCGCACTCATTTCTTTTGAAACATTC
AGTCTTCCACGCTCACATTCATTCTCACAGTCACTCAACTCACGTTCACTCATGCTCACC
TCACCTTCGTCGCCATCGCGACGCGTACGTTTCGAGCTCGTGCTCGAGTCACGGCTCCCA
GCACGTCTCTTCACACTCACACTTCTGCTCCTGGAGGTGCTGGGAGCCAGTGCTTCCGCA
GAGGAGCTAGTTGCGCGACTAGCCCTCTGCGTCGCAACCTTTTCCTTCTCCTTCCGCTTT
CCTCCATCTCCCTTCTCTCCCTTCTCCACCTTATCCCCTTTATCCCCCTTAGCCCCAATG
TTTTTAATATTTTTGCGATCCATAACTGGTCCCACGAGAAGGGTCGGTTTATCGTCACCC
CCCGGCTTACGCCCTAACCGGGGGGAAGGCTGCTACGCTTGGGGGGCGCCAGGTGCCCCA
AGGGTGGCCGCTAGGGACCGGTGCACCCACCGGCCACGTATCCACAGTGTTAGTGCAAGG
CGGATACGCGCCCTTCGCCGCGCGCCATAGCTTGAGCAAGGGATTTATTATAGAGGTTTA
TCTCCTCGCGGCCCAGCCGGTTAAGGCAAGACCCCCGGCCGGTCTGTCGCGCGTACCACC
GGGACAGAGGGTTATTAGGCCCCCTGGCCCGGTGGGTCGTTGCTAACGACAGCCGGTTAC
GGTATGCGAGTGCTCGGGAACCCCGGGAGCGCAAAATCCCGAACCGCCATCTACCGGCGG
CCCCTGGGGGGAGTAGATAGGGACAGAAGGAATCTCGTTAATCCATTCATCCGCGTCACT
AATTAGATGACGAGGTATTTGGCTATTATTATTATTATTTTTTTTTTATAGAAGAAAAAG
GGTTTTGGCTTTTAGGAACTAAGCCCCGTCCTAAATGTTTGTCGACCGGTAG
>LINE_comp3605_g2_i3
TTCTCCTTCCATACTCAAATTTCAACACGTCACACCACACACTCGCACCATACAACACAC
ACGCTTCAAACAAACCCTTATACAATACACGCAACGCACGCTTTCTCATACCCCATTCAC
TCCGTAGGACACGAATCATTTGTCCTACCACATTCATGATCTTGCCTCTCACATTCTCCA
GATGCACCTTAAAATTCATACGTTCACTCATCCACACACCAAGATATCTCACACACGTAA
CATACTTCATACATTTATCATTCACACGTACATTCGGGCATCTACTCCTGGCCAAGCTTC
CTTTCAACAACATGCACACACTCTTGCTCTCAGAAACACTCACACCCACTTTCATTCCCC
ATTCACTCACAGTTCTCATCCATTCCGTTCCCTTTCGCTCAAGCTCCATTCGGTTCCGTC
CCTCTACAAACATAAGCAAGTCGTCCGCGTAGGCGACACACTTGCATCCACATTCACTCA
AAGCCCACAGGAGTTCATCCATCATTAGGTTCCAAATGAATGGACCGCAGATGGACCCCT
GTGGGCAACCACGCTCAACATTTTTCCATACACACTCATTTGCTCCTTCCATGCATACAA
CACGATCCTTAAAATAGCTCATCCATAACCCGATTTCCTCGCATTCGATCTCATTCAGTT
TCTCAATCACTCTCTTCCACTCTAAATTGTCAAACGCACCCTGAAAGTCCACAAACATAC
CCAACATATATTTACATTCACTCTGCTCCACACACTCTCGGACTTTCAGCCACGCACTCT
CGGTGGACCGACCCCTTCTAAACCCGTGCTGGGCCTCATGC
>LINE_comp3605_g4_i4
AGAGGTTGGTTGTGCCAGAATGAAACTGTACACCTGTTTGCCTCAGTAGGTAGGGACAGA
AGGAATCTCGTTAATCCATTCATCCGCGTCACTAATTAGATGACGAGGTATTTGGCTATT
ATTATTATTATTTTTTTTTTATAGAAGAAAAAGGGTTTTGGCTTTTAGGAACTAAGCCCC
GTCCTAAATGTTTGTCGACCGGTAG
>LINE_comp3605_g8_i1
CCATAACCCAATTTCCTCGCATCCAATCACATTCAACTTCTCAATCACACTCTTCCATTC
CAAATTATCGAACGCACCCTGAAAGTCCACAAACACTCCAAGAACATATTTCCATTCACT
CAGCTCCACATATTCTCGGACTTTCAGCCACGCACTCTCGGTGGACCGACCCCTCCTGAA
CCCGTGCTGGGCATCACTCATTCGTCCATTCACTCTACATTCCATACGATTCACCATCAT
TCTCTCTAAAATCTTGCCCAACACGGGCAACAAACAAATCGGTCTATACGATTTGGGGTC
GGTTCTCACCTTTTCGGGGGATTTCAGCAACGTTATCACTCTCGCTCTCTTCCATTC
>LINE_comp3607_g1_i2
AGATTCCCTCTGTCCCTATCTACTGGGGTATACAGGTGCACAGCTTCATTCTGGCACAGC
CAACCTCTCCTCCACGTGGTGTACCCTGGGAAACTTTCGAGTTTGCCAACGAGGCTCTGG
CGCGACTCTCCTGCGAGCGTCCGGGCGGTATTTTATACCGTACGGACCGCGGAGTCGTCA
AATACCGTAGCCGGTATGTCTAGCAACGACCCACTGGGGACATCCACCCAGTGGTACGCG
AAGCATAACCGGTCGGGGGGCTTGCCTTAACCGGCCGGACCGCGAGGAGATAAACCTCTC
TAATAAATCCGAAACCTTAAGTTATGGTGCGCGGCGAAGGGGTGCGGGCCGTCCTTGCGA
TGGTCCGTGGTTGGTGGGTGCACCAACCCTTAGCGGCCAACCTCGAGGCACCTGGCGAAC
CTCGTTGTATTCAGCCTTCCCTCCTGGAAAGGGCGTCACCCGGGAGGGTGACTTCAATTC
GTCCCAACTCGTGGGAAAAATATGGGAAAATCTAAAACTAAAACCAAACATACAAACATA
TGGCCGAATGAGGAGGTCTTTAAGGGCCTTATTGAGAGCGAAGAGACCCTGATATCTGAA
GGGGAGGATTCACCCCTCCCTGACACTATCAGGATTGATCTGGATGGCTTCCTTGCGGGG
CCAAGCCGAAAAAGAAGGATACAGAAGCCGGAAGGTTCCGAATCGGAATCCGGCGAAGAA
GAGAGAAACAGGCAACCCAAAAGGCGGCCAAAGGGAAGAACGCCGTTTGAGCGGCTTACA
AAGTGGGCTACGTTGGTACTGAATTCATTGCCACGCTATGGAATCAGCCAACAGATTATT
GAAAGTGGAAATTTTGCCACCCTCCGTGGTGCATTGGACGATGCCTGGAAACAGATAGAG
TCCGATGACACCTACGAGGATGTACAAGGAAGAGAAAAGGAACTATCTGAGAAGCTTGAA
AAAGCTGAGAAGGAAATAAAAGATCTCAAGGATCAGAGATCTGTAGCTTGTAAGAGGCTA
CATAAGAGGATTGAGGATGCCGAAGGGCGGGCTCAATCTCTCTTAGAAGAAAAAGAAACA
GAGAGCGAGAAATTATATAAGAAGCTTGAAGAAGCCGAAAGGCGGATTCAAGCTCTCTTA
ACAGAAAGAAAGACAGAGAGCGAGAAATTGAACAAGAAGCTTGAGGAAGCCGAAAGGCGG
ATTCAAGCCTTGGAAAAAGAGAAGGCATGTGCATGTGCCAAACCAAAGCCAAAGGCTTTG
GAAAAGAAACCGTCCACGGCGGCAAGTACGCCAAAGAGGAAGGACATGGTCAAGTCCTAC
GCGACTGTGACCATGTCCAAGAAAGAGATAATAGAGAAGAGACCGACACGCCATGTCGTG
ACGGTCTACCTAAAAGACAACAACTCCGATTGGGAGCAGACAAGAAAGGCTATGGCGCGA
GGCTTTAGACCTACACAGGAGAAACTGCAGGTAAAAGCAGTAAAGAAGATAAGCAAAGGA
GGACTCCTCGTCGAAACGACGACGAAGGAAGGCCTCCAAAGTCTTATAAAGAATAAGCCC
TTGCAAAGCTTGGGACTTAAGATCGGCACTCCGCCGAAGAAGAAACCAAAGATGGTCATT
TATAATGTACCAGATTTGGACGAGAAACAGTTGCTTTTCGCTCTAGAAAAGCAAAATGGC
GAATCGATATCGCCTGAGGCGATCAAAGAAATAAAGCCCCTGTTTAAGACAGGGAAAGGG
AATAGCAAGAATTGGGTGATAGAAGTATCACCCAAAGCAAGAAAAGCGCTCAAGGACAGA
GGAAGGCTGTTCCTTGAGTGGCAAGTATGCCACGTACGTGATTACGTAGTGGCAGGGAGA
TGCTTCCGCTGTCAGGCGTTTGGCCACATAGCCAAACACTGCCGGGCGGTTGCAGATACA
TGCGGCCACTGCGCCCAAGAGGGACACTCCTTCAAGGAGTGTCCAAATACGAAAGAGAAG
CCCTCTTGCATTAACTGCAAGAGGGCCCATAAGCCACATAGGCACTCGTCCAGATCGGAC
GAGTGCTCAGCGTACAAGTACGCAGTTGCGAACCTAATCCAAAAGACGGATTACGGAGAT
TAATTGAATCGAAAGATGGTGAGACTCCACCCGAACGACGGCGCGGGCATAACGACCTCA
CGGAAGTTATGTGTCGGGAGGGTGTGATCGCAACTTGTTGCGATCAAAACTCTTACAGAA
GCTTGTCCTGTAAGCCCGCTAGAGACCGAATGCGACTCAGCCTCCTCGTGGTCCCCGCTG
GTAACGTCCTGGACGGTAATATTCCGTCTCGACGGTTATTATCGGACAGGGCGGCTAAAT
GAGTCGCGCCCCGCGAGGGGCGGTCTTCTCTTCTGATGATCCTGCGGGTGAAGGAGAGGT
TATTCCAAACACAGGCATCGTACAGGCGCCGGCTGTACGGTGCTCTCTTGGCGTGGGTCC
GCCAGAGAAGTGGAGGCCCATCAGGCTTCTCGTTGTGACTTGTCACATGCCGATATGAGT
TTAATCTCGAGGTGCGGCATGCCCTACTTCAGGGTAGCGAAATACCTTCTGTCCCTATCT
ACT
>LINE_comp3609_g1_i1
GGTACTTCCCCCTTCTGGGGATGCTAACGGGGTGAGGGGTCACCAGAGGAAGTAACTCCC
GTGATGTGTCAGGCTGTACCGGTAGGTTCAACCATGCCGGGGAGGCTGACACGGAGGAGC
GAAACCACCTCTGGTGGGGACTGGAAACATGGTCGCGACTTTTGGCAAACCTTTTTTAAT
AAACAACTTATGGCTGACAAAAAGAATAAAATTAAAGGCTACGGTGCAGGGGGCGTCGGA
ACCCCCAGTACCGGTGCGGGTAAGAGTGTACGAGCAGGCTCCCCCGCATCGTTAACCTAC
GACTGCGGGCCTGCCGGGGTTGGCCACAATGCCCCGGAGGCGGAAATGACGAGTTGTGAG
CAACCACCGACAAGGCATGTCCCCGGACGACGATCTTCGGATACGAGACCCAGGAGGGAA
AGCTCCTTCGACGAACCGGTGGCGGGGCCATCCGGTTACACCTGGAGGGGGTCACCAGGT
CGCAGGAGCTTCGAATGTAGTCTTCAGGAGGAGTTGGAGGATGTCAGCTTCGCCTCCACT
GCCTCGGGCATGAATATACCCGGACGAACGATTAGACACGTGAACGTTCAAGGAGTAGAG
GGACCGGACCAACTGGTGGGGTACATCGACGAGCACCGTTGGAAAGTGCGCACCCCGCAA
GGCGAAGTGCGCACCGTCGACAACCGGAAGATGCCCTGGAAGAAGGACGCGGCTCATTTG
GCTGCAGAGAGGTTTACACGCCTATCGCTCGAGGGGGCTCACGGCGAACCTCACGCTTTG
GCTCCATTGGAAGACTACGACGACTATCTTCGTCAAATGAAGGAGGAGTGGAAACTCCAG
CACAAGGACGACCGACAGCGGAGGGACGAATCCGTTTGTACCATCTCGTCGACGGATACC
GGCGGAGGACGCAAAAGGAGGATACCACTGGATTACCCGAGTAGCGGTGAAAAGTGGTCG
GAAGAAGAGCGACTTCGAGCGGACATCGAATACATAAGGACTGGGAAAGTGACGGAGAAG
AGCAAAAAGAAGAAGAAGAAGAAGGACACTTTGCCTACCGACGAAGAAATTCGAGAAGAC
ATAGTTTGTATGAGTACCGCAGACTTGGCAGCGAGGGTCATAGAGCTGCAGGACCAAATA
CACTATGTGTCGGAACACTCGAGTAACCTAAAGGGAACGTTTGTGCGGTCGTTGCGACTG
TGCGCGAAGATTACGAAGCACATGGCCATGGAAATGCACTCCCGGTTTCAAGGGCCTGCG
GACGTGATGCAGCTTCGGACGGAAAATGCCAGGCTGCTGACGCAGATGACTGAACAAGAC
AAGACTGTTTACGATCTGAAAGCAACGATAGAGTCGCTTCGAGCCGAGCTGGCAAGATCA
AGAGAAGGTACGGCGAAAAGTCAGGCTCTAGAGTCTCGCGCTAGAGCCGCGATGACGGAA
GTCGAGGAAGCTAAGCAGAGCGCCGTGTTCGACTTGAAGGTGGAACTGCAGTCGATGGAA
CACCGGATAATGGATCAAATGAGGGGATCAATGGAGACGTTCTTCAAGGAAAATCTCCAG
AGGCTGGGACTCTCGGAGAGGAAAGGGGAAACCTCGACCTCGAGTGGGAGGATTCTCGAG
TCGAAGAAGAGCAAAAAGGACGACAGTAACATGGCCTCATTAAGACGTAGACTCTTGGAG
GCCCAGGCGCGGTTAAGGGAGTCATCCCCGATCAAGGCGGGAGGCAAGGCCCTTACCTTT
GCCGATTGCGTGAGAGGCAAGAGTAAAAGGAAGGAATCTACCGACGCGGGAAGCAGCCGG
ATGATTACATCTACTCCACTGGGGTCGGATTTGGAGGACACAGTGGATAGATTATCGGAT
TGGACGGCTGTTTCAAAGAAGAAGACACGGGAGAAGAAGAAGAAGAAGTCGAAGGTCGTC
TCGGCAACCTCCTCGGATGGAGAGGCCCTGACGTCTGGATCGGAAAGGAAGAGGAGTCGT
AAACAGAAGAAGAAGACAAAGAAGGTAAAACTGGGGAGAGTACCGGTTACATCCGCGGTT
ACCTTGAATATACTGGAAGCAGGGAAGATCTCGATGTCGGAGGCGATAGCCCTAGCCCGG
CAGAAGGTCGACCTCGGGACTATTGGAATTAAACCTGGGGAGATTAGGTTAAAAAGAGCC
GTGACAGGAGGAGCCGTCCTTGAAATTCTGGGCGAGAATTGTAAGGAAAAGGCGGTAGAA
TTGGCGGGAAAGCTGAAAACAGCTTTCGAGGAAAGGCCGGAACTGAAGGTGGGACTGCCG
CAGAAGTGCTGCGAGCTGCGTCTCCGCCGAATCGACGAATCGATTACCAGAGCTGAAATC
GCGGCCGCGATCGCCACTACCGGCGATTGCGATGTCGACGATGTTAGGGTAGGAGAGATT
CGTTTCCCGACGAATGGACTAGGTGCCGCATGGGTGAGGTGTCCCATCGGTGCCGGAAAG
AAGGTCTTGAAGGAAGAAAGGCTAGCGATCGGATGGTCGTCGGTGTTGGTGACGGCGCTG
GAAGCCCGACCACTGCAATGCTTCAAATGCTTGGAGTTTGGGCATGTTCGGTCCAAGTGT
CCCTCGACCGAGGAGAAAGCTCCGGTGTGCTTCAAGTGCGGAGGAGAGGATCATCTGATC
GGGGCATGCCCCGAAGAGAAACATAAGTGCCCGGTGTGCAACCGGAAGGGTTTCGACTCG
GAGCATCGAATGGGTAGTCAGATGTGCAAGGCCCTCGAGATGAGTAAGAAAAGGGGAGGG
GATAAGGCGGAGATACCTCCGCGTCCATCCAAGGATCCCCCCGAGAAGACTACAAAACCG
GTGGAACAGCCTGCACCGGCATTTCAGAAGAAAGTTGCCTCGCCGTCGGCAGCGTTCAAG
AGGCCGCAAGTCGTGCCCGAGAGGTTAGTAAAGAAGAAGAAGAAGGGCCATTCGGACGCC
GGGAAGAAAACGGCGACTTCCTCGAGGCCGACGATACCCCGCACAGAGATGGACTTGTCA
ACTAGTGGAGAAACTACTTTTGAAATGGAGCAAGAGTTGTAGAGAGATCTACAATTTCTT
GTGGGGAGGGGGAGGGGGGGATCAATAAGCCTCGGCTTGCTATCCCCACCTCCCAACCAG
TTTCAACAGAGAGGAGGGGTATAAAGGGATACATGTCGCTGTTTTCCCGACATGTATCTC
GGACTACAATAAACGAGTTACGATTAACGGGACGAAATTTGAGTCTGGCGGGGTTTAGTG
GGAGTACCGGAAGCATCGAAGGCGCCGGGCCCCGTCGCTAAAGGACTCCGCGATGGAAAA
CAGTGGGGTTTAGCCGGTACAAATCCGGCACTGTTCCCGGCTGGATGGCCGGGTTCGTCT
TTTTGAAGATTCCCCACTTT
>LINE_comp3613_g1_i1
ATAAATAAATAAATAAATAAATACATAAATAAAGAAATATATAAATAGCTAAAACAATGG
ACAAATAGGTGGATAAATAAATATGTAAATAGTTAAAACAATAAATAAGTAAATAATAAT
AAATAGATAAATAAATTGGCAAACACCTGGCTGTTACAGCTGTGGAAAGATAACTGTGCC
ATAATATGAAATGAATAGAAAGAGTACGAAAGTTGATAGATTAAAAAGAACCAGTGTCCC
ATCACTAGTAAAATAAGAAAACTAAAGATTGATAAAAAGCGGTTAAGTAATGTCAAAAGT
CGATAAATAAAACAGAAGAAAAGTAGTAGTTTAATTAAAACAAATAATAATAGATAGCAT
AAAAAAGAGAGAAGCAAGAATTAAAATAGATAGTTAAAAGATTAAGAGGGATAGTTGAAA
ATATTAAAAGCAAAGTGCATAAGTATAGGTTGTTAGTTAAAATTCCATAGTTATTAAAAT
AATAAAATATAGCGCACAGACACTTGGTTAATGGTTAGGTATCAACTTTTGTACTTACCC
TATCGCTGCCTCCGTCTGCTGCTCCTCTACCTAAGTCGGGGGAGTTGACCCCCGCAGTTC
TTAAATGGGTCGGCCTGGATCAGGGGCCGGGACATCCTCGGCGAGTGCCTCGCGATACTG
GCGAACTCCCGATACGTGCTCCACGTAGATATCCCGGCTCCACCGGACAGTCTCCGACAC
AATGAGCCGGCGCATCAGAGATGCGTACCGATTACCGATACGCAAAATCTTCAACACCGA
CTCATTGGCCGGATCCCACGAGCCGAGAGCACCGACGACGATCGCGGAGACCGCCACCCG
ATAACCGCGCCCTCCGAGAACGTCGGCCAGGGGCTTATACTTATGTATCTTTCGCGCCCT
GGCCTCCTCGAACGAAATATACTCGTTCTCGAAGGGCACGGTAACATCGACGATGACGAT
GCTCCTTGAGGGCTCGTGCCTAACAACAATGTCAGGCCTAAGAGCCCCCAGATCCCCGTC
GATGCCCTCGACCGTCCGGTTAACCCTTAATTCCCCTGGGAGCCGGCAGGCCTTAGCGAT
GCGGGAAACCACCGCATCGTGGCGAAGTTGCCAGGCCGCCGAGTGCGGACGGCAGTGGCA
AAGGACGTGGGGAAGGGATTCGAGCTCCGCCCCGCATCGCCGGCAACGCTTATCACCCTC
ACCCCAGCGTCTTGCCCCGTTAAGAGGCAAGACGTCGAGGCGAGCTCGGTGAATGAAGCG
CCAATCGGCGAAGCGGGTGAAGTTGCCGCCGCGGAGGAAGTGGTTTGAAGCACCACTCCG
CGACGACACCCCGAATACCTTCCCCTGGTCCTTCTTGCGCTGAAGGCGCTGGTGATAGTA
TTCTACCACTGCCATCCGCAATCGGCGGATTATCTGGCCCCTCGCCACGGGCGGGACAAT
GGTCTCCCGATCGCGAGAACCCCTGAGCGTAACCGAGAGCTCAGATCTCGCCTCGCTCCA
CTGCCAACGCAATCCGAGCAGGTCCCGACTCCTGCGTGCCGCGTTCCGTGCCCTCGACCA
CAGCGAAGAAACGTCCCCCCCGTCCCTGGCGAAGTACCCCTCCAGCGAACCAGAGAGGTA
CTCGGCCAGGTCATTGTTCGACGGGTTGGTATGGCCGATTTTCCTGGCTACAGCCTCGCG
CAGCGAGTTCCAGGCCAACTCCCTGACCACCGCATCATCCGCCGTCAAAAGACGGAACGC
ATGAGCGATGGTCAGGACGTCGGCCATGTCAGCAAGCGGAAGCAGTCCACATCCCCCCCT
ACTGGGTGGGAGGTAGACTACCTCCGCGCTGGCCCGCTGCGGGAGGTTGAGCCAGGATTT
GGCCATACGTCGCACTTGCTTGTCGACTTCGACTAAGGGACGTTTCTCCACGTGGGCTCC
CCGCAGGTAGAAGTCGAGGCGTGGCAGTATAAAAGCTGCCACGGTCTCGGCCTTCTGCCA
CGGGGCCAAGAGGGAACGGTCGACGGCCTGCAGGTCCTGGACCAGCTCGTCGATCGTCAG
CAGTGGGGTTTGACGGACCTGAAACCCGGTGGGAACGCCCAGGTGTTCATAGGGCTCACC
GGCTGCCAGGGCGCGCATTTGCTGACCCTGGATGGTGAAGCGAGTGGCACGGATCCCGCG
CGGCCCCCTGCCACGATGGTGGAGGGTCGCGCATTTTGCGGGATTAAACCGCAATCCGAT
GCCACTCGCCGCAGCATCCACTGCCTTTAGCAGCGTTTCCATGCCCTCCGGGGTGTCGGC
GATCAACGCGAGATCGTCCGCGTACGCCAGGACACTGTGCCGATGGCCGTGCAACGTGTA
ACCCGCCGAGGTTCCGGTAGCTGCGCGCAGCACCGGTTCCAGGGCGAGGTTAAACGCCAC
AGGGCTCATCGGACAGCCCTGGCGCACCCCGGAGAGGATCGGAACGGGGTCGGTAAACCC
GTCGGCTTTCAGCACCCGTGTGGTGCAACCGTGGTACATACTCTTCAGAATATTCTGAAT
AGTATGAGGGGCGGGGCACATACGTGGTGGTTGGCGGGATCCTGACGGGCGGGGTTCTTG
CGG
>LINE_comp3613_g1_i2
AAAAAAATAAATAAAAAAATAAATAGAAAAATAAATAAACAAATAAAGAAAGAAAGAAAT
AAATAAATAAATAGATGACTACACAAGTCATACATAAATGATATAGCTAAAAGATATTCT
AGTTGATTTAGCGATTAGAAATAGATGTGAGTTAATAAAATATGCGGCTACATACTATCA
GGCCTATCCACTTACCTGTTGTCTTCTTTGCTGCTGTCCTCTCGCTGCAGTACCTGCCTA
AGCCGGGGGAGTTGATCCCGCAGTTTCTAAGTGGGTCGGCCTGGATCAGGGGCCGGGACA
TCCTCGGCGAGTGCCTCGCGATACTGGCGAACTCCCGATACGTGCTCCACGTAGATATCC
CGGCTCCACCGGACAGTCTCCGACACAATGAGCCGGCGCATCAGAGATGCGTACCGATTA
CCGATACGCAAAATCTTCAACACCGACTCATTGGCCGGATCCCACGAGCCGAGAGCACCG
ACGACGATCGCGGAGACCGCCACCCGATAACCGCGCCCTCCGAGAACGTCGGCCAGGGGC
TTATACTTATGTATCTTTCGCGCCCTGGCCTCCTCGAACGAAATATACTCGTTCTCGAAG
GGCACGGTAACATCGACGATGACGATGCTCCTTGAGGGCTCGTGCCTAACAACAATGTCA
GGCCTAAGAGCCCCCAGATCCCCGTCGATGCCCTCGACCGTCCGGTTAACCCTTAATTCC
CCTGGGAGCCGGCAGGCCTTAGCGATGCGGGAAACCACCGCATCGTGGCGAAGTTGCCAG
GCCGCCGAGTGCGGACGGCAGTGGCAAAGGACGTGGGGAAGGGATTCGAGCTCCGCCCCG
CATCGCCGGCAACGCTTATCACCCTCACCCCAGCGTCTTGCCCCGTTAAGAGGCAAGACG
TCGAGGCGAGCTCGGTGAATGAAGCGCCAATCGGCGAAGCGGGTGAAGTTGCCGCCGCGG
AGGAAGTGGTTTGAAGCACCACTCCGCGACGACACCCCGAATACCTTCCCCTGGTCCTTC
TTGCGCTGAAGGCGCTGGTGATAGTATTCTACCACTGCCATCCGCAATCGGCGAATCATC
TGGACCCTCGCCACGGGCGGGACAATGGTCTCCCGATCGCGAGAACCCCTGAGCGTAACC
GAGAGCTCAGATCTCGCCTCGCTCCACTGCCAACGCAATCCGAGCAGGTCCCGACTCCTG
CGTGCCGCGTTCCGTGCCCTCGACCACAGCGAAGAAACGTCCCCCCCGTCCCTGGCGAAG
TACCCCTCCAGCGAACCAGAGAGGTACTCGGCCAGGTCATTGTTCGACGGGTTGGTATGG
CCGATTTTCCTGGCTACAGCCTCGCGCAGCGAGTTCCAGGCCAACTCCCTGACCACCGCA
TCATCCGCCGTCAAAAGACGGAACGCATGAGCGATGGTCAGGACGTCGGCCATGTCAGCA
AGCGGAAGCAGTCCACATCCCCCCCTACTGGGTGGGAGGTAGACTACCTCCGCGCTGGCC
CGCTGCGGGAGGTTGAGCCAGGATTTGGCCATACGTCGCACTTGTTTGTCGACTTCGACT
AAGGGACGTTTCTCCACGTGGGCTCCCCGCAGGTAGAAGTCGAGGCGTGGCAGTATAAAA
GCTGCCACGGTCTCGGCCTTCTGCCACGGGGCCAAGAGGGAACGGTCGACGGCCTGCAGG
TCCTGGACCAGCTCGTCGATCGTCAGCAGTGGGGTTTGACGGACCTGAAACCCGGTGGGA
ACGCCCAGGTGTTCATAGGGCTCACCGGCTGCCAGGGCGCGCATTTGCTGACCCTGGATG
GTGAAGCGAGTGGCACGGATCCCGCGCGGCCCCCTGCCACGATGGTGGAGGGTCGCGCAT
TTTGCGGGATTAAACCGCAATCCGATGCCACTCGCCGCAGCATCCACTGCCTTTAGCAGC
GTTTCCATGCCCTCCGGGGTGTCGGCGATCAACGCGAGATCGTCCGCGTACGCCAGGACA
CTGTGCCGATGGCCGTGCAACGTGTAACCCGCCGAGGTTCCGGTAGCTGCGCGCAGCACC
GGTTCCAGGGCGAGGTTAAACGCCACAGGGCTCATCGGACAGCCCTGGCGCACCCCGGAG
AGGATGGGAACGGGGTCGGTAAACCCATCGGCGGTCC
>LINE_comp3613_g1_i3
AATAAAATAAAATAAAATAAAATACGCTATGGCTCGTAACTAACTAAGAGAGGGAGCGAA
AGAGAAAAGGTATATAAATAGACTAGATTAATTGACTAGGGTCACTTAGTTTTTAATAAA
GGATTATATTCGTACTTACACAGCCGCTGACCCCTGGTGTTTCTGCCGCTTAAGTCGGGG
GAGTTAGCCCCCGCAGATTTTCAATACGTCGGCCCGGATCAGGGGCCGGGACATCCTCGG
CGAGTGCCTCGCGATACTGGCGAACTCCCGATACGTGCTCCACGTAGATATCCCGGCTCC
ACCGGACAGTCTCCGACACAATGAGCCGGCGCATCAGAGATGCGTACCGATTACCGATAC
GCAAAATCTTCAACACCGACTCATTGGCCGGATCCCACGAGCCGAGGGCACCGACGACAA
TCGCGGAGACCGCCACCCGGTATCCGCGCCCTCCGAGAACGTCGGCCAGGGGCTTATACT
TATGTATCTTTCGCGCCCTGGCCTCCTCGAACGAAATATACTCGTTCTCGAAGGGCACGG
TAACATCGACGATGACGATGCTCCTTGAGGGCTCGTGCCTAACAACAATGTCAGGCCTAA
GAGCCCCCAGATCCCCGTCGATGCCCTCGACCGTCCGGTTAACCCTTAATTCCCCTGGGA
GCCGGCAGGCCTTAGCGATGCGGGAAACCACCGCATCGTGGCGAAGTTGCCAGGCCGCCG
AGTGCGGACGGCAGTGGCAAAGGACGTGGGGAAGGGATTCGAGCTCCGCCCCGCATCGCC
GGCAACGCTTATCACCCTCACCCCAGCGTCTTGCCCCGTTAAGAGGCAAGACGTCGAGGC
GAGCTCGGTGAATGAAGCGCCAATCGGCGAAGCGGGTGAAGCTGCCGCCACGGAGGAAGT
GGTTTG
>LINE_comp3613_g1_i4
ATAAATAAATAAATAAATAGATAGATAAATAAATAAATGACTATATAAATACATAAATAA
ATCAATAATAATAGAATCACAGACAAATATCACATAATTAGCTATTCTGGATTGCTTAGA
GGACTAGAATAAAGTAAAATAGGGTCACTTGGTTAAAATATGTGTACTTACTTGGCCGTC
GCACTTCCCCATCCGTTCCGCCGCTTAAGTCGGGGGAGCTAACCCCCGCAGGTTTTCAAT
AGGTCGGCCTGGATCAGGGACCGGGACATACTCGGTGAGTGCCTCGCGATATTGGCGAAC
TCCCGATACGTGCTCCACGTAGATATCCCGGCTCCACCGGACAGTCTCCGACACAATGAG
CCGGCGCATCAGAGATGCGTACCGATTACCGATACGCAAAATCTTCAACACCGACTCATT
GGCCGGATCCCACGAGCCGAGAGCACCGACGACGATCGCGGAGACCGCCACCCGATAACC
GCGCCCTCCGAGAACGTCGGCCAGGGGCTTATACTTATGTATCTTTCGCGCCCTGGCCTC
CTCGAACGAAATATACTCGTTCTCGAAGGGCACGGTAACATCGACGATGACGATGCTCCT
TGAGGGCTCGTGCCTAACAACAATGTCAGGCCTAAGAGCCCCCAGATCCCCGTCGATGCC
CTCGACCGTCCGGTTAACCCTTAATTCCCCTGGGAGCCGGCAGGCCTTAGCGATGCGGGA
AACCACCGCATCGTGGCGAAGTTGCCAGGCCGCCGAGTGCGGACGGCAGTGGCAAAGGAC
GTGGGGAAGGGATTCGAGCTCCGCCCCGCATCGCCGGCAACGCTTATCACCCTCACCCCA
GCGTCTTGCCCCGTTAAGAGGCAAGACGTCGAGGCGAGCTCGGTGAATGAAGCGCCAATC
GGCGAAGCGGGTGAAGTTGCCGCCGCGGAGGAAGTGGTTTGAAGCACCACTCCGCGACGA
CACCCCGAATACCTTCCCCTGGTCCTTCTTGCGCTGAAGGCGCTGGTGATAGTATTCTAC
CACTGCCATCCGCAATCGGCGGATTATCTGGCCCCTCGCCACGGGCGGGACAATGGTCTC
CCGATCGCGAGAACCCCTGAGCGTAACCGAGAGCTCAGATCTCGCCTCGCTCCACTGCCA
ACGCAATCCGAGCAGGTCCCGACTCCTGCGTGCCGCGTTCCGTGCCCTCGACCACAGCGA
AGAAACGTCCCCCCCGTCCCTGGCGAAGTACCCCTCCAGCGAACCAGAGAGGTACTCGGC
CAGGTCATTGTTCGACGGGTTGGTATGGCCGATTTTCCTGGCTACAGCCTCGCGCAGCGA
GTTCCAGGCCAACTCCCTGACCACCGCATCATCCGCCGTCAAAAGACGGAACGCATGAGC
GATGGTCAGGACGTCAGCCATGTCAGCAAGCGGAAGCAGTCCACATCCCCCCCTACTGGG
TGGGAGGTAGACTACCTCCGCGCTGGCCCGCTGCGGGAGGTTGAGCCAGGATTTGGCCAT
ACGTCGCACTTGTTTGTCGACTTCGACTAAGGGACGTTTCTCCACGTGGGCTCCCCGCAG
GTAGAAGTCGAGGCGTGGCAGTATAAAAGCTGCCACGGTCTCGGCCTTCTGCCACGGGGC
CAAGAGGGAACGGTCGACGGCCTGCAGGTCCTGGACCAGCTCGTCGATCGTCAGCAGTGG
GGTTTGACGGACCTGAAACCCGGTGGGAACGCCCAGGTGTTCATAGGGCTCACCGGCTGC
CAGGGCGCGCATTTGCTGACCCTGGATGGTGAAGCGAGTGGCACGGATCCCGCGCGGCCC
CCTGCCACGATGGTGGAGGGTCGCGCATTTTGCGGGATTAAACCGCAATCCGATGCCACT
CGCCGCAGCATCCACTGCCTTTAGCAGCGTTTCCATGCCCTCCGGGGTGTCGGCGATCAA
CGCGAGATCGTCCGCGTACGCCAGGACACTGTGCCGATGGCCGTGCAACGTGTAACCCGC
CGAGGTTCCGGTAGCTGCGCGCAGCACCGGTTCCAGGGCGAGGTTAAACGCCACAGGGCT
CATCGGACAGCCCTGGCGCACCCCGGAGAGGATCGGAACGGGGTCGGTAAACCCGTCGGC
TTTCAGCACCCGTGTGGTGCAACCGTGGTACATACTCTTCAGAATATTCTGAATAGTATG
AGGGGCGGGGCACATACGTGGTGGTTGGCGGGATCCTGACGGGCGGGGTTCTTGCGG
>LINE_comp3614_g1_i1
CAGTGGGGGCCCGTCTGGCCCCACTGTCGTTGATAGTCCGGCGCCGCCGACTGCGCTGAC
CGATACATCCTAGTCCGCGGGCGGCGCAGAGTCGTCGGGGACGGGAACGGGAGCGGGCCC
CACAGGGCCCCAACCCCAGGGGGAAAGTGTGGCAGTGGAGGCAATGCAGTTGGTGGATAT
AGATCCAACAATTGCCGCCTCCACCGCTACGCTCGTAGCAGAGGGGGAAGGTCCGGAGGG
GGCCATGGAGGTCGATAATTCGTAGTCCTCCAGACCAATCTGGGCCGCTCCAAAAGGGCA
CAGGACCTCTTGGTCCAGCACCTGATGGAGCACCGGGTGGGGCTGTCGATCGTAGCGGAG
CCATACGTGGTGCAAAACCACCCTCTC
>LINE_comp3614_g1_i3
CACGACGCTCTTCCGATCTCCCAGCCGTAGCCGACAGGAATTCGATGAATTCCTGGGAGG
ACTCGGGGACTTTGTCCTGCGACAGGGTCCCCGGGCGGTTCTCGTCCTGGGGGACTTTAA
CGCCCATGCGACAGCATGGGGTTCCCCCAGGACGGATCCGAGGGGGTCGGCGCTGCTGGA
GTGGGCGGCTGGGTTGAACCTGGTGTGCCTAAACACCGGTTCGGAGAGCACGTTCGTGTC
GTCGAGGGGGGAGTCTGTGGTGGACCTCACCTGGGCTTCCCCCTCGGCGGCGCGGCGGGT
CTCCGACTGGCGGGTCCTCGGGGAGGTGGAGACCCTGTCTGACCACGTTTACGTGTTCAT
GCAGGTGGACTCTGCCTCTCGCGGGGGGGCATGCCTGGTTGGACCCAGACGCTCACGCGG
GGGTGGACCCCTACCACCGCGATGGAAATGGGGGGATATCGATGAGGACCTTTTCAACGC
CGCGGCTCAGGTCGTGGCTTGGGCCTCACCGAACAGCGGCCTCTCGCTGGCTGACCCGGT
GAACCGCATTGCTTGGGAGCTCCGGCGGGGCATGGTAGCGATTTGCGACGCGTCCATGCC
CCGTGCGGGGCCTCCCAGACCCTATGCAAGGGCCTATTGGTGGTCGGCGGAGATCGGGCG
GTTGCGTGTTTGCTGCAACCGACTCCGCCGGCGGTTCACCAGGGCCAGAAAGCGGGGGCT
AGAGCATGGGCGTGTCGCGGAGGCATACCGGGCGTACGCAGACGCCCGGTTTGCGCTGCA
GCACGCTATCGGGAGAGCCAAGTCCCGTGCCTGGGAAGAGCTCCTCGGTGCCGTGCACGG
GGATCCGTGGGGTCGGGCGTACAGAATCGTCTTGGGGAGGCTCAGGCCCTGGGCCCCCCC
AACGACGGAAACGTTGGACGTCCGGACGTTAAACACCATAGTCCGGACCTTATTCCCACG
GGGGGATGGTGCGCCCGATCTCGGCCCCGTGGACCGCTTTATAACGTCGGCATTGGCCGG
CGCGCGTTCGCGGGCATCCGGCTTCGATCCGGGTGCCGGGGGGTGGTCGCGCGGGCTCGA
AATCGACAACGAGGAGCTCGGGAGGGCGGTTAAACGCATGAGTGCCAAGAAGGTCGCGCC
TGGGCCGGACGGATTGCCCGGGCGCGCCTGGGGCGCGGCGATGGGGGTCCTCGCCCCGCG
GGTCAGGCGGTTGTTCAACAGCTGCCTGGCCCGCGGGGACTACCCGCGGGAATGGAAGGA
GGCCCGGCTGATCCTCATAGCTAAGCCTGGGAGGCCTGCCGGAATGCCCTCGGCCTATAG
GCCGATTTGCTTGCTCGACGAGGTGGGAAAGCTGTTTGAAAGAATAGTAAATTCCCGCCT
CGTCGACCACCTGTCCCTTCGTGCGCCGGGACTGGATGGGGCCCAGTTCGGGTTCCGGAG
GGGGCGTGGCACGATCGATGCTATCGGTCGTGTGCGCTCCTTCTCCGAGAGCTGGACCGG
CCGGGGGGGCGTGGTGATGGCGGTGTCGATCGATATCGACAACGCCTTTAACACGCTGCC
CTGGTGTAAGATACAGGAGGGACTGGAGTATCTC
>LINE_comp3617_g2_i1
TATTTATTTATTTATTTATTTATGTATATTTATATATTTCTGTGCCTCTTCTTTTCTTGT
TTATATTTATGTATGCTATGTATATTTGTTTATTTAATCTACGCTACTATTATTTATTTA
TTTATATAATTTATTCTAGTTTGGCTATTTATTCGATTAACTATCTACTTCCACTAGTAT
ATACATATTCAGACTCTTGCTAGATTCATATAAATGCTAAGGTGTTTATGAGATAAGAGC
CACCGCCGATTGAGATCTGAAAATAGCGACAGACGCTATAGAGTTATATCAACTATTTTG
CCTTCGCCATAAAGGCGCTACTATGTATCCACCCCCAGCCAAACAATGTAAGGCTGGGGG
AACATTCTTTGTGAATAAAGCGCTTTTTATCTGTTCTTATCAGCTTAATATCTGATACAC
TCCGCATCGCGGAGTCAGAATATTAACCTGATTTTTGGAGTCAGGCGGATCGCTGGGGCT
CGCTCCACTTCCGCCGCGAGTCGGTCCGGCACTGCAGTGCCGTCGGAAACGGCTCAATCT
GCGCTGCAATTGAGCAACCTTTTATCTTTTTTTCACCTGCTGGACCGAGTCGGGACTCCA
AAAAGTAAGCCCCAATATTCTGGCTCCGCGAGGTACCCGAAATCGCGGTAAATTCACCCG
CCGCGGTACTACGCAACAGTGCGGGCCGAGTTGCGATCGGGCGTGTGCGCGGCAAGGTCT
GTACACGATCAGTGCTCGAGGTGTTGTGCGGTGAAGTGTGTAATAAGTGCCTTCGCCGCG
GGACCGGATCGAGCCTGCGCGGGAGTACACCTGCGCCGCCCACCTGCGCGGGAGGACCAC
CGGCGCACCACCACCTGCGCCAT
>LINE_comp3617_g3_i1
TCCCTTCCCGGCGGAGTTCCGATGCCCTGCCTGCTTCGGTGTCCCCGGGATCAGGATGAG
TGGCGTGTACAAGTCCCACACGGATTTGACAAAGCACGCCCGGAAACATCATCCGGGCGT
TGTATTGACGTACAAGTGTCGTGAGTGCAGCTTCACCGGCGATGGGAAGTACCCTCTCAA
GGTGGTGAAGCTGCACCACGGCCATATTCATAGTTCCGCCCACCAGAACAGTCCGAGTGG
GACTTGTGCACCTCCCGTGACAGGTGCGACCGGTCCAAGCAACACCTCGCGTCGGGGGAG
TTCCGCGACATCCGCCCCCGCAGAACCGCGCGCTGCTGCGTTAGCTGCTGCCAATTTGGC
GGCCCAGTCCCCGCCCCCGCAAACGACGTGCGCCGCGACGTCGCCGCCCACACACACCCT
TTCATCGGCGCGGGATGCAACGGGAACGGCCACCACCACCCGCACGACGCGGCGCGCAAT
GGCGGCAGCGGCAACAACAACAGCAACAACAACAGCAACAATGACGACGGGAAGAACAAG
GAGGACAACGAGGACGACGACGAAGACGACGACCACGAGACCGGTGGCGACGGGGGGCAA
GGCGCGGGCCCCTAAACAAACTACGTTGCGTGGGGTGCTGGTAACGGCGGCTGCGACGGC
TATGACGACGTCGTATCGCACGCCGCCGTCCGGCACTCCCACGCTAACGATCACGATCGG
GCCCACCACCAGTGCCCGGCCCGCGCCCCCGCCCCCCACCCAACCAACCTACCCCAGACC
TAAGGGGACGCCACCGGTCCAGAAGAGCGGCAGCCCGCCGCGGCGATCGGGGTCGGCTGC
CCCAAGGACATCGCCGCCGGCTGCAAGGGCGCCTGCTACGAGGAGAGGCTCCGGTCCCTT
AGCCGCTACCGCAACGAGGCCCACCCCACCGGGCAGAAGAGCGGCCCCCGCTACCAGGGG
GTCGACTGGCACCCCTCCCGCAAGAACCCCGCCCGTCAGGAGCCCGCCTGCCACCACCCA
AAGGCGGGTGACACGGGGTATGAGGGGTGCCAAAGTCCCGGTGGAGGTGGGCAGAAGAAC
TGCCACCACCACCACCCGGAGGACGGTAGCGGCTCCGACCGGAGCCAGAAGAACGCCCCC
GAGATTAGGAGGGACACCCACCGCCCAAACTCCATCTCCAAGGGCGGTGGCTCAAGGGAA
GGGTCCCTCCAGCGGCCCATCACCACCTCGGGCCGCCCAAAGGAAACCCTCGGGGGTAAG
GACAGCGGCTTCGCCATCATACGCCGCCGTCACAGCGGGCGCCCCTTCCCACACGTCACC
TCCCTCGCCGATAGACGTCGCGCCGGAAAGGGGGCTGCGTACAGCAACCCGGGCCATCCC
TACAACGCCCGGGCCCACACCACCAAAACGCAGCCCCCCACCGAGGAAGCACCGGAGCCC
CAGGACGCCGCCGACCATCCGCGGCGAGCAGGGGGCTCCGTCTCCGGTAACATCGGCGAG
TATGGTGACGTTATGCACCTCCACCGTTACCACCACCTGCAGCGGGGGGCCGATAATGAC
CCCCCTGCCTATTGTGGGAGGAGCGATGGTGGCCAGGCCGCTACCACCATCTCCAGCGGC
CCCGCTCCTCCCACCCATCGAAGAGGTGGAGGTGCCACAGCCGGCCGGGGCAGCCGCAAC
CCCGGAATCATCACCGGAGCCGTGGCGAATCGCCGCTGGATCCCGCCGACGCCACCACCG
CGGGATCCCGTCGTCCAGCTCGTCGTCCGACGAGGAGGCGCAGCCGCTGCCGCCAGCGAA
GAGGACGACGCCTCCGCCCGCCCAACCACCGCGGGAAAAGTCCCCCGCCCGGCCGCCACC
GGGCAGCAGCAGCAGCAGCAACAATAACAACAGCGTTGCGCACAACAGTGCGCATCGGCC
TGGAGCAGGGTGCTCCGGGGCGCCCTCGGTGAGTAGCGTAACATCGTTTAGCCTTTCGCT
ACTCCCGAGTGTCCCACGTAGTGCCCCCGGCTCCCTTTTTACTTTGCGGGAAGGGGTAGT
TTTAAATCGCGCGGGGAGGGATAATCGGAGGCCCGTCCCCGTTGATGCAACCGTGAGGGG
TGCTCCTGCCTCCGCGACGGAGGCGACCGCACCTGCGAGAAGTCGCAGACCGACCGCACC
CTCGCGTGCCTCGGGACCTCGTGAGCCCAGGCGTCCTGCGGCATCCGGGCAGCCCTCTCG
AAGAAGGGGCGCCATCCGGCCTTTGGTCGGGGAAGCGTTTCCTTCGGAGAGAGAGTTGTT
GATCGGAATGGCGCAGAACGCTGGCTCCCTGGAGCAGCTGGAGGATGTTGCGAGGGAAAT
CGCAGCATACCTTCAGGGCTTCAGAGTCGAGGGACCGACCACGAGAGGGGGCGGGACGGA
TAGGCCCCAACGGCTTGCGAGAGCTAGGGGCGTGTCGGGCGACCAAGCGGCTCGCGGTTC
GAACGGTCACCGCGATCGTCCTGTGTTGGCAGGTGGACCAACGCGGGGGGACCAGGTAAG
GGAGGCTACGCGTATACAACGGCTCTTCAGGCAGAACCGTCGGCGTGCTGTTCAGGAGGT
GCTCATGGGCCCGTCCTTGCACTGCAAAGTGCCAAAGGACAGGGTACATGAGTACTTCCT
CAACATGTACTCACCGGCGGGGAACCTGGGAGCTAGGCCTCCCCCGCCTTCCATCGAGGC
TCCAGACGAGGCCAGCAATGTGGCCTTGGTGAAGCTCTTCGAAGTGAGTGAGGTAGATCG
TCGGATCAGGCGTATGACAAACTCTGCGCCCGGTCCCGACGGTCTAACTTACAATGATCT
GAAAAGGGCAGATCCGGGGTCACATTTGCTGACCTCTTTGTTCAATTTGTGTCTTCGTCT
GGAGTCGGTCCCCTCGTGTTGGAAAACTTCCAACACTGTGCTCGTGCACAAAAAGGGCGA
TCGCGACGACCTGTCGAACTGGCGACCGCTGGCCATGTCCGATACGACCCCGAAGCTCTT
CGCCGCTGTTCTGGCTGACCGTCTCGTCGCGTGGTCGGTCAAAAATAAGCGCCTAAGTCC
CGCGCAAAAGGGCTTCCTGCCGTACGAGGGGTGTTACGAACATAACTTCGTGCTGCAGGG
AGCCCTTACAGACGCTCGCAGGTGGGGGCGTCAGGTGGTGGTGGCGTGGCTGGACCTGTC
GAACGCGTTCGGCTCGGTCCCCCACGCTTCCATCTACCAATCCTTCGTGGAGGCCGGGGT
TCCCTCT
>LINE_comp3826_g1_i1
TCTATTGGGAATGAAGGGTTCGGGAATTCACAGCGTTGAAGCTGCGACATCGTCGAGTGA
AATCTACAAATAAATGTAGATAATTTCAATGTTTTAATTAAAAAGGGGGCTTGCGAGTAC
TCTCGATGCCAATTGTATGTATTATTAATTGAATTGCGTGACACTGTTCGTAATACAAAT
TTTGATTAAATGCAAATATTGTGTTTATGTTTGTAGTACTGAATGAGTTCCATTCAATTT
TTATCTGATATTGAGTGGTCGTATAACAAGTTCCAAAAATACGATGTTGTGAACGTTTAA
AAATAAATTCGTATGAACATCGCGCATCTAAAAATTAAGATAATAAATCTTTCACGAGTT
ATTTATTTAAGAATACTTTCTTTGTGTAATAAAAAATGCAATTAGTGAATTCTGGTGCCC
CCCCCATGACATTCCTGGTATAACTGAATTTTCTTGTTGTTAATTGAGTAATCCACGCAA
AGCAATTGCATTCTGAATATACTTAGGAGTGAGATTGTATAACTACCATAGTATTATG
>LINE_comp3877_g1_i1
GCTTATACTTATGGGTTTCTTCTGTAAAAATTCTTCACTTTTAGATGGTCATGGAATTTT
TATATCATGGCGGATGCGCCACATTAGAAGTAAATCAGAGTGATGTGTTAGAATTGATGG
CCGCAGCGAACTTCTTCCAACTAGATGGTCTGCTTAGGTATTGCGAAGCCCAATGTTCTT
CAATGGTTGATATTGACAACATTGTCTCCATGTACATTCACGCTAAGGTGTACTATTTTT
CGTGTACATTTAAATAATCATCTATGACATTGATGCATAACATCTGCAGCCTATTTGCGT
TACACCTGACTCATTTTCAATTGAATGTTCCAGGTTTACAATGCAACGCAGCTACTAGAA
TACTGTCAAGGATTCCTGTTGCAAAACATGGTTGCATTGTTGACTTACGACGACTCGGTG
AAGCGTCTCCTCTTCGCTAAAAAGTTGCCGAATCACGACGTTCTTGCAGGGCTACTTCTC
ACTTTACAAGCGCGAATAAAGGCCAGGCGATCTCAGCAACAGAATAAGATAAAGACATAG
AT
>LINE_comp4195_g1_i1
AAAATTAGTAAAGCCATATTTGATTTTAAATATTTAAGTGAAACCTACTAATCGTAGCTG
GGACAAATATAGTATTTCAAAACTAGCATGATTTCGAAGTTAGTGTTGGACACTGAAGTA
CTTCGAATCGCTTCGAATCTGAGCAAGTGACGGAAAAATCGAATTATTTTGAATATAATT
AGGTTTCATAAAAGGTCTTAAAAGATTTGGTAATTTCTTGAATTTATTTTTTTATATTTC
CACTGTACATTACAATTTGTCCAGGATGGACATTTGGAAAATTGTTTTAGTAGTACTTGG
GGATGTACCACGTAGATACTTTCTCAGCAGAATGCAACTATATAGTAATCGCCCGTTTTG
TTATGGGGAGAAGATCGTTCGGGCGTTTTCTGTGTAATCCTCTGGGAAGATCTTCTGAAT
ATAACTTATTTGCTACGTCACTTGGCTGATTTTCTAGTCTCGTTTTATGTCTGTCACATA
AATCTTTTATTTCCTTTTCGACTGATCTGATCATAAGATCGTTACGTAATTGTTCGTTCC
TCACATACCAGGGCGCGTTTACAATGGTTCTTAGTATGATGGATTGCACTGCTTCTATTT
TTGCTATATGACTTTTGGCTGCCATGCCCCATAATGCTACCCCATATGTCCAAATGGAT
>LINE_comp4217_g1_i1
TTAAGTTATGGTGCGCGGCGAAGAGGCGCGGGCCATCCTTGCGGTGGTCTGTGGCTCGAG
GCACCTGGCGCACCTTGTTGTATTTAGCCCTCCCTTCTGGAGAGGTCGTCACCCGGGAGG
ATGACTTCTATTCGTCCCAACTAGTGGGATCAATTATGGGAAAGAACAATAAAAGCAAAA
CTCAAAACAAGACAATGTGGAGATATAAGGAGCTTAAGGCCCTCGCGGAGAAAGAGACTG
GTCTGATGGCTAAAGAGGAGGATACACCCCACCCGAACATCATCAGAAATGAACCGGG
>LINE_comp4322_g1_i1
TCCCCAACAACGAATAAAGATACGCGAAAAATAAAAATATGCGAACATCCACGGAAACGG
TGCGCAATAAAAAATCGACATAGAAAAATATATATAATGTACACATTGGCAAATTTATTC
GTCGTTGGCGAAACCAGATGTATATGGAATGTAGTGTGTCTATTTTCTGCGAGTGTTGTG
ATGAACAATATCAAAGTAGATATCGCGTTTCTGTATCTTTAAATATTTCCTTTCTTCCTT
TCTTTTGTACTTCAGACCACGGGAAACGAACAGCTTTATGCTTTCGAGAGACGTTAATGG
TTTGTTCAAAAAATGAATTTGCAAAGGACATAAAACCAGTAGGTGGTTATTGCATTCTGG
TTGAGGCTATGGG
>LINE_comp4466_g1_i1
TATTTTCGAGCAGCGCCGTGACACGTATGCAGCTCGCAGATAACTTGAGACAGTAGTTAC
CCCAGTTGTTTAAGTTCGAAATGTATGTGCCCCATAATTTACACTCTCAGTCAAAAAAGC
CAGCCCCCTTAGAATAAAAGTCGACTCGCAGGGTGCAGAACTCCTCACTTATTACCCTTT
GAATTCATTTGGAAGGAAGAAACTTCGAAATGCTTCAAGGGAGCGAAAGTTTTACCGGCC
ATTGGTATCAAAAAGCCGATTACCGCTCTGAGAGCGAGTAAAGTGTTACGGTTAAAGAAT
GACGATTATTAAGCAGCGAATGTTCACGCAGTTTCCAGCCTCTAAAAACAAA
>LINE_comp4494_g1_i1
AGAGGCTTCCAGGAATCAATGAAAACGGTGAACGGCTGCTTTATCGAAGGCGATTTCTTT
TAAATATTAGCACGAGCTCTCCGCGTTTCGTGCGTCAGATACGGATACGTAAATCCTCGC
TGATGCGTCCTCAAACAGGACCGCTCCGACTGTCTTTTGTAATTACTGCTATCGCTGCTC
CAACAAACCTATCTCCCTCAAATAGTGTTCGAGCGTAGCAAACAAAGCAACGTCTCTTAT
CTAGCCTCCTGCAAGTCCCTAAATCTTCCGAAAATTATCAGTTCGGTCGCGATAAACAAC
GCAACCGAGTCCAGGGGAGAAGAAGGAGAAGGAGAATACGAAGAACAACTCCGACTCCGC
GTCCCCGTCGTGCATTTCCATTGGCAAACGAAAAAAAGAGCAAGGATAAACGATCGTTTG
TATTCGCGACGACGATTCCCGTTCTACGTGTGA
>LINE_comp5371_g1_i1
AGTGATGCCGTAGGTCCAAATAAGTTTTATAATGATGTTGTAGATAATATCTGTTACGTT
TTCTTTTTTATATGATGTATCCATGTTAACTTGGAGTCGAGGCGTAGGTGGTTGATCCAT
GCCAGTACTATATGCAGTAATACTATAATTGTTTTATTTGGTTGAAATATTCCTTGGAGA
TATTCTGCAAATGCTGTAGTTTTCTCATAGCGACTCTTAGCTCACGCACGGTCTACTTTC
CTTATAGGTGGAAGAGAAATCACTGGTTTCTTAAATCTTTTAGTGGCTTTGCAGAGTGAG
TAGTTGATGTCTTCATTAGGCGATAGTGTTGAGATGTACGAGTAAAACTCGTCGTTACAG
AAGTTTTGTATGGGTTGTTAGACTTCCATGTTAATTGCGTTAAGTCGTCTTTTATTGGTG
GTGGTTTTATATTTTTGTTAGGTTTGTTTTAATTTATGTTTGAATTTGATTGTTTTTAGT
ACATGTTTAGGATAAGAATTTACCTGTTTGTTCTTGTAATATTGGTTAGTAGCAATCCAC
CCAGCTTCTTGGATTAGGCTAGTCAATTTGATTACTGCTTGTTCAATATGGTCAGGATTT
TTTAATGGTATATTAAAGCTA
>LINE_comp5440_g1_i1
TGTATGTGTGGTATTTGGTATTGTTGGGAGATCTGCTGTGTATACAGTGTAAAGCACTGG
ACTCAATACACTTTCTTGTGGTACTCCAGTCTTTATTGCTTGAACATTTAAGTTCTAATC
TTTTATTTTTACGTAAAATGTTCTATTATTAAGGTAGGATTTTAATAATTGGTAAAATGC
GTCTGGAAATTGCTATTCTATTATTTTTAATAACTGTCGTGCCAAACATTACCGAACGCT
TTCTCTACGCCAGAAAAAAAACATGTGCTGTGTTACACTCGGGGCGTATTCGTAAATAAA
CAGGCGACGAAGATGCGTCCTAAAGTATAATTTACAATCACGCAGCTAGCACAGAGAGAG
AGAGAGAGAGAGA
>LINE_comp5846_g1_i1
GTTCGAAAAGATCATAGCTGCCCGCCTCGTCCGGCACCTGCCCCGCGACGGACCCAACCT
GGCGGCCTGCCAGTATAGTTTCCAAGAGGGAATTGGCATGCCATTAGAGAGGCACTTGTA
TTACACAATGTGCCTCCCTATCTCAGGGCGGTGATCGGGTCCTACCTGCGGGACAGGGAG
ATCGTGTATCAAGGCCGGTACAGGCTAATGCGGAGGGAGGTGGACTGTCGGGTCTCGCAG
GGATCGGTCCTAGGACCGGTCCTGTGGGACCTTGGATATAACATGGTCCTGCAGGACTCG
TTTCCCGACGACGCCACCCTGGTGTGTTGCGCTGACAATACCTTGGTTTGTGACCGTTGG
GAAGTGGCTTGGGAGGACCATCCGCGGAGCGGACGTCACGGTGGCAGCCATCGTCGCGCG
GATACGATACGACTTGGGACTGAGGATAGCTGCGGACAGGACTGAGGTCGTCTGTTTTAA
CGGGCGGCCTCGGTCGAGACCGCTCCTAAGGTCATGGATCCGGGTAGGTGGAGCTTGCGT
CGAGCTGGGCTCCAGTATGAAATATCTGGGTCTTCTATTTCTTCTCCACGCCGAGATACG
CACCGTCGGGGCTCTTCTACCGCCCCTGGATAAGTGGCGGAAGAGAGGCTACGGCCGGCT
CGCCTACCA
>LINE_comp5922_g1_i1
AGTTTTCCTCTTTCACTCTTCTCACTTCATACTTGTAACTATTCAAATTTCTCTTATACT
CTTCTTGTCTTTCACTCACTCTTTCACTCCCTCTCTTTCTCGCCCTTTGCCATGCTCTCC
TACTCTTTCGCACTTTACCCTTAAGGGTACTCAACTCTCTCGTCCACCATGCAATCCTTC
TATCATTCCTTCTTCTACTTTCACTCAAATGCCTTCCATTCACCTCCTGGATCCAGCCCG
TCACTCTCTCAACCATTCTATTAACATTCGCTTCTTCAATCATATTCACACCATCTACTT
CTGCAGTCATTCTCAAGTCATTCACATATTCTTCCCAGTTAACATTCTTACATCGCCATT
TTCTCCTTATACTTTCATTCCTTGCTTCACTCACACCATACTTAATTTCTATTTGGACCA
CGTTGTGGTCACTCACGCTCCAGTCATTCCTCACCTGCCATTCCACTTGGCACCCGGCCG
GCATACCATTCATCAATGACACATCTATATCGCTCTGTCCATTCACTCCCGAGAAGGTGT
ACCATTCGCTCGGCTCATTCAACACTATCATACCATTCATCAAAATAGATCGGAAGAGCG
TCG
>LINE_comp6216_g1_i1
GTTCACTGGAAAGAACGAACGGAGGTATACCTTTCTCTTCTTCTCCATCGGTTCACTTGT
TACCGATGATTTCGATACCTTTCATCATGCTCTGCGTTAATTCGTCCTCTAAGAAGAACT
CCGGAACCTCGGGAGGTGTGAATACAGGGGGCGCGGAACTCGGCGGCGTTATATTATCCT
GACAATCGCACAGGAAACATTAGAGAAACATAAAAACTGTCTATATCTCTGCATTCGATT
ATCAATTGAAATTCAACCTGCGGGGTTAAAGGTGAACCATCGGCGGCGCACGGCTCCATG
ATCAAAGAGGGGAACAGTCCTCGATGTCCGCGTATTTCTCCCTCCCACCATCCGTCGTCG
ACGTCGTGCGGCTCTTTGTTTATAATCTTCACGATGTCGCCTTAGTAGAAGCTGACCTCT
TCGTCGCACGTGGCGTCGTAATCGTAAAGAGCAATACAGAATTGTTCCACTTCTGCAAGA
AGATCCAGTTTCACTAAATGAAACAGCGGAACCGAGTAAACAGAA
>LINE_comp6449_g1_i1
GATCTGTGTGCGAGTGTGATGACCGTGAGAGGATGTGATGAGCGTGATGAGTTGGTGAAA
ATGAGAATGATTGGTGAGAAGCTGCGGAAGTGTGTTTTCAGTGATGTGAACCGTGTTAAT
AAAAGCGTGAGTGAATGTATCTTGAATTGTGTCGGAGAATATGAGGAATGTTTGATGCGA
ATGATGTGTGAGAATGAAAGGTTAAAGGGTCGTCTGGATGAGTGTGTGAAGCGTGATTGG
GTGCGTGAGTCTGTTAATGTGTCACCTGTTCAGGGAATGACTGGGAAATCTTTTGCGAGT
GTGGTCGGATCAAAGCCGAGTACTGGTATGAGTGTGAGAAAAGAGAGAGTGATTGAGCCG
ATGCGTGTGACTGAGAGAAAGTTTGCCGTCGTCATCAAGCCGAAGGATGACAGCTCTAAG
ATGACGAGTGAGCAAGTCAAGGAGAAGGTTATGAATGAGGTTAGTAAGAGTCTGAATGTT
CGAGTTAAGGCCGTGCGTAAGACGAGGAGCGGTGGAATTGCCGTCGAGACGGTCAGCGAG
AATGAGTTGAAACGTATGCGTGAATGTGAGAAGTTTGCGAAAATCGGTTTGCGTGTGGAT
GAGCCGCGTAAGATTGGAGCAAAAGTGATTGTGTATGATGTCCCTTGTGCGGTAACGAAT
GATGAATTAATGAGTGAATTGTATGAGAAAAATTTGAAAGAGTGCGTGAGTGAGAGAGAG
TTTAAAGAGCGTGTGCGTGTGGTCAGTAGGACCAACAAGAAAGATTCGAGTGTGGGTAAC
TGTGTGTTTGAAATGAGTGTGCGAATGTGGAGCAAGTTGATGAATGAGGGTCGTGTGTAT
ATCCATTGGCGTGCGTG
>LINE_comp6477_g1_i1
AACACTCGAAACGATCTTTAGACCTCCCCGAAGTGTTACCTCAGAAAATTCAAATTATAT
TTATATTACGAAGTTGCCTTTATTAAACAAAATTTTCGTACAATCAAAAATATATTACCT
ACTTATGTGCCTATGTATATGAGGACATGTTGAAACGTACACGTAAATATATATATACAT
ATATTCAAAGAGAGAATCTCAATTCAATTGTCGCGTAAAATATTTTATACGAATCTTTTT
ATTTTATTACTATATATAAGTTAAAACGTAAACGAACATTGTTATTTGCGTCACAATAT
>LINE_comp6478_g1_i1
AAAAATGATTCGTACAACATTATAAGTAATTCTCCTTTGTAAAAGCAAATTCACAGTACA
GACAGAGAAAGAAAGAAAGAATGAGAGAAAGAGAGGGAGAGTGCTCGGAATAGCGTTGCT
AATCGGCTCGCTGTTCTTGGAGCACGTTACGTTCATATTGCTATATCCTTGCCGGCAATG
AACTTGCGGCAATTCACTGTACAGGGTATACGGTCGTTGGCTGCCCACTAATTATTATGC
AATATGCCGGCCGTGCTCTCTCGCGAGCATGCTTATCCTTTTAGAGTCCCAGCTACGAGG
CCTTAGGAACGCGACGAGCCGATCGTCCCGAACAAATGAACGCTGGACGAGTCGCCGTTC
GGCTCGGCTCAGCTTCGGCGAATTACAGTCGTCCTCGGCGGACTTTCCTCGAGATTGACG
GCGGAGTGACGCAAACACTCGCCGCGGATAATAGGAAATCGTGAATAATCGATTCGGCCG
CGAATAACGTGGTTCTCGCGGTGAATTGCCCCGGTTCTCCCTAACGACGGAAACCTCGGC
CGATCGT
>LINE_comp6571_g1_i1
GTAGTAATAAATGTAAATATCAATATTAATATCGATCAATGTTTATGTCTGCATTAATGC
TCAATTATATTGTATCACTAATTGTTTTGTTTAATCCTTGCTTCAGATAAATTCAGCATT
TCATTTATCATGTTGCATAGCTAATGGCTCCTAGAAAAATTTAAGTTCCATTGGGTAAGT
GCAAGTTGCAGTTAGTATAGTGACTCGGTCAAAACCATTTAATTGCAATTACTGTATATG
TTATCCTATTAAAGCAAATGTTATTGAATCTACTGGCACGATCCTAACGGAGCAAATCGG
AGTATCACATCGCCTGCATTTCCGGCATGAATTCTGTAATTCAGTAACCGCATACCAGGT
AATTCACACGTAATTAAATATTCATCTAGGGGACGTATAAATTCGTCATCGTTAAAGCTT
TTTGACAGGGATCCTTTTGAATTTATGCTTCAAGCGGTGTTTTTGCAACTGTTTCGTTCG
CCGAGGTAAAAACAACGCTTACAGGTTAATTCGTGTACCAAATTTTCTGTATATTTTGAC
AACTGACGTCGACACAGA
>LINE_comp6793_g1_i1
GACGTGTGCTCTTCCGATCTCTAGGACGGATCCCTGAGGTACCTCTACAATGGTGGGTTT
TTGGTGGATTTGTATTTAGCCACTTGAACATACAATGATCTGTTGCTGAGGTAACTTCTG
ATTAGTTTAATCAGCGCATGGTTGAATTTATTGAGTATTAGTTTGAACAGAAGACCCTCT
ATGCAGACGGAGTCGAAGGCTTTATTCAGATTTAGAAGTACCATGACCGTACATCTGTTA
GTATTTATGTGATGAGCATGAAAT
>LINE_comp6816_g1_i1
AAGGAAATCGGTGAAATTAGAAACAATACAATTGTATTTACTTTTGGTTCGAAGAATCTA
TTATTTTATGTCATAGATTGGATCATGATTTTAATGGTAATGTATTTTAATATCTCAAAT
AATTTCGGTTTTTGTAACTTCTTTTTTCCCAAAATACTACTTTTGATTAACTTTCAATTG
TCGACGCTGCTTCCAACATACTCAAATCGTTTCCTTCGGAAGATAATATTTCAATATTTA
TAAGAAACTATGATGGTGAACCGATAAGTATTCCTAATGTCTATATTCACGTATTCTATT
TTCCTAATATTCTAATGTCTATATCCAACTATCCTAGTATCTCAATATTCTAGTATTAAC
ATCAAGTTATTCTAGTATCTTAAGATTGTAATAATATTCTAATATATATATATATATATA
TAT
>LINE_comp6880_g1_i1
ATAGACTGAATATTAGAATCGTATCATACAAGATTCATAAAAATGTAAATTACCATCGCG
GAAATAGACTGTGTTTTATAACTTCCAATCTATGAAAATTTCATATAATCTTCTTACCTC
CAGTGAAAGTAAATCAAAAACAATCAAACATTGCAAATGATTTTTTCCTTCGACCGAATA
ATACACCCAATACTTTTAAAATTGCTACAAAAAGATTTAACGTTAGAGATCTTTTTTATT
TAATCATATTATATCTCGACTCCATTTCTACTTTTTCGAAACTATAAAAATCATTCGCAA
CCGCTATAAATATGTCTACCTATCTTCCAATCCACATAAATTCACAATCCCATTATTCTT
AGTTACAACGAATTAGAAGGAATGAAAATAATTATACCTCCCTGCTTGACTAACCGTCTT
CTCTCCAACCAAACAATCCAATCAACATCTTCGAAAGCAATCGCAAAAACATAACAAAAA
TATCCTAACCGGCAGAAATATCCCCTAAACTGAACAAGTCGCATATCGGAAACATGCTAT
CGGAGGCTGCCACAAAACGCGCGCCTG
>LINE_comp7188_g1_i1
TAGAACATTCAAATTTGACACCTCTAAAGACAAAGTATACCAATTTTTATGAAGATCATA
TCAAGTTATGAATTTTGGCCAGCTTTTCGTCAAAAGGCACCACTGTGCGGCGAACGAAAT
CTACCAAATAGGTAAAACCGTTGATGTTACTTCGTTTCCACGCAAATTGAATTAAAATGG
CAGGGTTCTCTTCTTGCGAAACGTTGAATGGCGAATGCAAGAAAAACAGGTGAGAATGAA
ATGTTTCAATTACCCACGGTTGTTGAGTTCGCGTG
>LINE_comp7356_g1_i1
ACTTTTTAATGGAATTATTAGATATGCGTCGTTGAACAATTTGTTATTTCATTTAAATGC
ATGTTAAACGACATATAAAATGAATCTATAAAACGAATGGAAAGTATTAATAATGGTCTG
AGTCGAGTTGTTATTTAACATCCGTAGTAGAAAAACATCGACCACTTTTGTTGGAAACTA
TTGGTCTGGAGGTTTAACGTTGTTCTTTCGTTGTATTGTTTTTCTAGCAGTGAACTTTAT
ACGTGGCGCTTGGGAACTCGACCCACATTGCCATCGACCTTACTGTTTGGACAGGTTTTA
TTTCAGTTTCTGGATAAGAATCGAATGCATATTTCATAGGTTGTTGAATTTTTATGTAAT
CGTACTACCGACTCATTTA
>LINE_comp7693_g1_i1
AGTGGAGTAGACGTTATCCTTGATTAGAGTAAGTAGTGGGATCTATTAGTGATCAGACTA
ATTGTACGTCCACGTACACGCGAGCCACTAGATACCTGTCTGTGTTTGTCAATCAGGGGA
ATCAGTGCACATAGCTCGATAGTTCAGTGGATTGGCGTAATTCCCTGACCGGACGGACAT
ATTGTGTAAGATCTTCATTATCTGAGTAGAACAACGCAAGTATATGGTCAGACAGGACAG
GAGTCCAATAACACATATTCACATATTCCAAATAATACAAGCGTAACATTTTTAAAAACT
CATTTACTGAAAGTCATGTCCACTAGAAATTTACTCCTCTTTGTGTTCTGTTTATTGCAC
TGTTTATTCTTTATAATAATTGTTGTGTTCAGTTTTAAAGCTATATAGGATTAGTTGAAT
AAACTTGTTGTCTATTGGTTAGACCAGAATGTTGGTTCAAATTTCAGGTTGCATTCACGA
CCAGAATATACAGT
>LINE_comp7694_g1_i1
GCTGCAGACGCGGCAGTTGTAGTATGAACATGTGTGTACAATGGCGTTGCTGCTATACGT
GTGCATGAAATTCCACTGGAACATGTATAATCAAGTAAAGTGCGCTGTGCTAGCTACTGC
CAGCTACATAACTATTTAAGACATTTTCACACTTATTGTTAGATGACAGAAGAATACTAA
AAGCAATCACATTTCTCCCAAGTATCTTTTAATCGAATTATTATTTCCCACGCATCTTGG
AAAGAAGTATTTTCCTTTGAAAATATCTGGACAATTGATTTTCACTTATTTATAAT
>LINE_comp7697_g1_i1
GAAAGTGAGTACGGTAACTTTGATTTGGTAATCGGTGATCGATGTTCCGGCATAGCACAT
CGTTTTGTCATCCCAGGAAATTCTGTTGAAGGCGTTGCGATGTTGAGGATTATTTGAATC
TTCCATTTGGAGAATGTTAATGAATGCATTGTTGGTGAAGATATTTGTTTCTCGTTTGTG
GAACGTTTGAAATAATGAATGTAGGTGACGAATATCTTCGATTTATTTATTACCCGTGGA
CGATGGATATGGTGATT
>LINE_comp8309_g1_i1
AGAAAAGAAATGATTTTCTCTGTAAGAATATAAAATATATTTGCGACAAAAAATTGTATT
CTGTTCCGTACACTCGAATGCACAAATGCATACAGATTTACTATTTCTCACACATTTACT
CGCGACAGAAATAGAAATACAAATCAGTTTCTGGAATGGCCAACAATATTCAGGATAATT
GGTACACATTGTTCGCAGCTGTACAGGCAACGCAGACCAAGAACCGGCTACGCAGCGGAA
GCATTGTGAAACTTTGTTTCAATTATACACCGCGAAACGCCGGTTGTTACGCGTATGCAG
ACGCACCGTGAGCGTTTAGCGTAAAATTTCACAATTTTCCACGCACTTTGAACGTTTT
>LINE_comp8310_g1_i1
GTTTGTTTGCTTTACTCTAAATTTTGTTGTACAGTTTGGTTTCTTTCAGGTAGTTTATTG
GGTTTCTAATATGATTCTGTAATGTTAGAGTGGTGTCTGCGTCTAGTTTATATTTGAGTT
TTTGTATTTGGTATCGTCGACATTCGTATAGCAGATGTGTTGTTATTCTCAGGTTGCAAG
TGTTGCGGAAAGCTGGTTCCCTCTTTTTTAGGTGTTCAGGAGTGATTTTTGTGTGTCCTA
TTCTGAGTCTTGGTAAGATTGACTTATTTTTTATGTTCAAGTTGAGGGTGGGCATTTGGT
GGTAGAAGTCTTGTACGATGTTGTATATATATATGTTCTATTGCTCGCGGTCCATATTCT
GTTCCATTCTTCTTTTTCGGTGATATAGATTGATTTTAGGAGGTCTTTGAAAGGAATTTG
TTTTTTAATTTCTGTTTCTGGGTCAGTTATTGCTTCTTTGGCCATATTGTCTGCTTTTTT
ATTTCCTGATATGCCTTGGTGGGAAGGGACCCATGTAAGTATTATATGATTGTTGTTGTG
TGAGATGCCAGTAAAGATTTCTTGGGTGGTTTGTATGATTTCGTATTTCTTTTTAGCGTT
TATATTTGTTATTCCATTGATTGTGCTTATGGAGTCTGTGTAAATAACAGCATGTTGAGA
GACTATTTACTTGTATGTATCGGAGATCTTCGAGGATTGCATAAGTTTCGGCTGTGAAAA
TAGGTATGGATTTCTGGAGGCGCAGTTTTTTTGTCATA
>LINE_comp8370_g1_i1
GCTTCTTACTCGCAGCATTGATCGGCGTTTTCACGGTTTAAAATTCGTTCCAACGTTATC
GTTGCTTCACGATTGACTCGGCGACCTCGATGTGTCAAGTGGTCGCCAATGTTGTCTGTG
ATTCGATACGGTATCGCTTCGATCGTGGGAAACTCGGATATCAAACAAAAAAGGGCAATG
TTCGTGAACAACTGAATCCTCGCGGTTGAATTGAACACACTGTTGAATCTTCGTGCGAAA
GGGAGACGGCGCGGTAGCTTGACGGAAAGTTAATCAACGTATTACACGATGGAATGAATG
TTCCTGCTGTTTCATTATACTCATTGCACCCGAACGAAAAGTCAGCTAAAAGACTTAATT
ATTATTCTGAGTAACATCCACAATCTGCTTTCAATACTCGTATAAATTCAGTACTACACC
CTGCATCTTAGAACGATGCGTCTGCTGTTTCCTGTAACAGGAAACCGCCTCGCTGGCTCT
ATCTCTCGCGGAAAGATAAATATTCCCGGAGCAGGGCAACTGAATAATCAGTGCCGGCGC
ACAAGCGTGCAAAATTGAGTGGCTCGCCTCGAGGGTGCATCTTTCGTTCCGTTCCACGTT
TCGGCAAGGGTCCGCCTTATCTTCGGCCCATTGTTTGCTGATGGACCATAGGTTGCCGGG
ATCCACGTGCGCATCG
>LINE_comp8426_g1_i1
TCTAGATTTCGATCCTTGAACCTAGCAGCTTGAATTTTAATATCTAAGTTTTGGGTTTAG
GCTCAGAGCTTCGAATTTAGAGTCCCGAAATGAAACTAGGCTTAAGGTTTAGGCTTTCGG
AGCATTGAACACAGAATCTTGAATTTTTAATTGAGGTGTGGGTTTAGGATTTAAGGTTTA
GGATTTAAGGTTTTCCATGTGGCGTGTTAGGCGTTCGAGCTTCGCCAGGTTTCAAGCCTC
GAGTTCAGAACTCCCGATTCTGCTCTTCAAAACG
>LINE_comp8485_g1_i1
CAACAGCAACAACAGCAGCAGCAGCAGCAACAACAAAGTTCGTTTAATGATTTTCCACAG
GTATGCAGTTTGCTGTATTTAGAATAAAATCCATTTCGATTATAATATCAATTTGTTTTG
GTTACAGTTTTTGACTAAAACAAGATTACAAGATCTTGTGAAAGAGGTAGATCCAACAGA
ACAATTGGATGAAGAAGTTGAGGAAATG
>LINE_comp8984_g1_i1
AGATCTTATTAATTATTTTGCTGTGTAGAATGTAACAACAATCTAATCTTTTTGTTTTTA
GACAGACAAATAGGTCTGTTCGTACAAAAAAACTTGTACGATATTTTCTTCAGGGAATAC
AAAAAGGTCATGAAAGAGTGTCATATTTCGCCAAAAGTTGCCACTGTACCAATACATGTA
CGTACACATATTTCCATAATGAATATTGAAGAAAACACGTAACAATTATCAATACAGTGC
TAAATTATTTCATTTTCCAGTTTGAAGATCCAGTTTTTGGT
>LINE_comp9255_g1_i1
AAAGAATGTAATTTTGTAGTAGAAATTGCTGATTTGATTCCGAAGTGGGTCGCAAACTCT
GATGGCGCCACGTTATCTTCATCCCTCCTCTTGACGAACTGTCAAGGTGAGGAACGTTGT
TTGTATACGAAATTTTTATCAGTTTTCAACCATATCCGCGATCCGAAGACTTCAAACAAG
TAAAAAAGATCAGGTGCGTATTTGTTTGCTTTCTCACAGCAAAATATATCGTTGTTAATC
CACGAGATTCATTTGTTCCCGTTAATGAATAGAATTGTACAGTACTGGAGATGACCGGCG
CTGCTACCACCTTTCCTGTCAATTTCTCCTTGTCCTTTTTCCATTTCTCTGTTATACACC
CTCTTTACTTATTTTCACCTTTCAACCCGCCAAGAAAAATAATTTCTTTTCATTTGCAAA
AAAATGAATAACCCGCCGTGAATTCCTTGCTAAACTTAACTCCGTCTGAAACATTCTGGA
TTCCGTTTTACCTTATTTCTCTTAACCTAACTGGAAAGTAAACCACTAAATCACGATTTC
AACTTTTAAAATTTCGATTTTCTGAATCAAAATTTTCATATTGATATTGTGCGTCGTTGA
ATTGTAATTGCAAGTAGTTTACTGCGTAGTAAATTGAATGGTTTTGGCATGTTCGCAGCG
GAAAATTTCCTTTTATTTAGTCCGTATTCAGCAGATTTACGAAATAATTATTTATATCGT
AAATAGAAGCTTCGAAAATTCATATA
>LINE_comp9400_g1_i1
AGAGAGAGAGAGAGAGAGAGAAAGTAAGAGAGAGAAGCAGAGAGAAAAAGAGAGATATGA
TTGATCCGGGCAGGTTCGATCGAACGAACGTGTAAATGAGGTATGCGGGGAGGAACTTGT
CAAAGATCGTCGCGCGATGAATCGGTTGCTCGATAAAACGCAAAAGCAATGTTCCCTTTC
CTCTTAGATATTCGTGCATTGGAAACGGACGGTCGTAACGTGAGAGAGGACACGGACAAA
GCATCAACGTAAAGAGAAATCGACGAGGATCTCGCCTCGATAA
>LINE_comp9545_g1_i1
TAATATAAAATATATTGAATAACAATAAAATATTGTATTTTTCTACATTTAGTGATGTAA
GTTAATCTCATTGAAAATCTCCAGCCACACAGCCCACTTTTCTTAAAATTACCCAGTACG
TAATGTGTTAATATCAGTGAAGTTGATGATATGAACGAAAAATTCTCTGTTTCTTCTTAT
TTGTAAGAACAAACAGTGTATTCAAATGTTAAGGAATTAGTATTTGAGTTTAACTATCAT
AAATATTCAGGAATGACACGACAATCAATGAGCCTGCTAAACGTGTCTTCTTCTTGAACT
TATTGTAACATAGTAACCTTAATACGTTGGCTGCCTCGATGGTTACTAATGACCGAAGCT
TCTAAATTGCTTGAAAATAATTATAATGAGAAGAAATTTATG
>LINE_comp9779_g1_i1
GCAACAATAATTGGATCGCTCCGTGTACGGGAGACGCATTTGGAAACTGACTCCCCGAAT
CGCTGAGTGGATCGACTGGGGACCAAAATTTATAACTTATCAGACAACTCAAATTCTGAC
GAGACATGGCTGCTTCCGCAGATACTTATTTAGGATTACCAGATCTCCTAAGTGCTGGTT
CTGTCCATAGAACATCAATGATGCTAATCATACTTTGGTTCACTGTCCCAGATGGGCTTG
CTACAGGGACCCGTTTGAGATAAAGTGAGG
>LINE_comp10014_g1_i1
ATCCACATCGTGTCAAAGGCCTTCTCGATATCGATCAAGCCTGCTGCTACTGTATTGTTT
TTGTGTAGTGCGTGTTGTATGTCCGATGTTAATTTGTTGAGTGCGTGTATTGTGCTGTGT
TTGTATCTAAAACCGAATTGCGTGTCTGGTATTATGTGTTGTTCTTCCATGTGCTTTTCT
AGTGATGTTTTGATTATTGTTTCGAATACTTTGGATATGTTGGGTAATAGGCTTATTGGT
CTGTAACTGTTCGGGTCGTCTGGTTTTTTGCCTTTTTTTTATGGGGATTGTTTTTGCGGT
TTTCCATGCGTCGGGAAAGTGGCTATTATTCAGGCAG
>LINE_comp10143_g1_i1
GTACCTAATATTTAATAACCACAATGATTGTGCTAAATCGGAATGCATTCATTCATTGTC
AGAAAAGCAGACTACGCTGAAGAAAGAATAGTGTCAGAAAGAGGATGGCTATACCTATCA
GTATACAAAGTTTCAGCAAATTGATGACTCGCAGACCTTGCCCTCTCCTTGTTAGTCTTA
ACACATTGTTGACCGAGAACTTTACGTAGAAGCTATTCGATGTCACCGATTATTATTCCG
TAATTAAATATGA
>LINE_comp10160_g1_i1
AGTGACATTCAACTGTTGAATAAATATAAAGTATAGTCCACGAAATTGAGAAAAGTTTCG
GAGAATACAAAATATATTCCACTGCTTTTATAGATATAAGTCAACCTCTTTTGACAGAGT
GTGGTACACCGGTTTATTGTATAAAATCAGATAGAAGATCCCACAGAAATATTAAAAGTT
ACTTAAATCATACTTAAGCGAAAGATATTTTCATATAGAATAAAATAGTAACTATTCTGA
AAAGTACCTCATTTTAGCTCGTGTTCCCCAAGGAAATATATTGGGTCGAACATTATACTT
AATTTTTTCAGCG
>LINE_comp10247_g1_i1
GGGAAGATTTCCTATCGGTATAATACCCGGGATAATGTCGGGGAAAGGATTAAAACGCGC
GATAGTGTGCAGACAGCACGATCACCATGGCTCCCGAGTTGGGATTGTATTGTAGTTTGA
AGTTTTCCGATATTCCCACGCGTTTCTGTATGCGTAATTAGTTCGTACGTATGCTATTTC
ATTAGCTGCTTGACGAAACTGCTGGTTTAGATTGCAATTAGGTGTCTGACGTCTACGCAA
GTCCTGTTTGATTAGCAAATTAATTGTTGTTACTGTTATTGATATTATTTTTATTATGTC
TTAGTGTTATTATTGTTGTTATTGTTATTATTGTTGTC
>LINE_comp10716_g1_i1
AAATTTAAAGACACCCCGGCGCCGCCGCGTTAAATATTTCAAGGAAATTAATATGACATC
CGTCTGGAATACTTGTACAAAGTATTTCCAACGGCGGAACCATCGGAGGAACGGAGCAGC
CGAATATGATACTCTAACCCGACACTTGTAACTTCGCGAATGGTTTTATTAATTTTCCAA
AATTCGAGCGGAAAACCCCGGCAAAATTCAATCATTAAATACACCTTGAATTACGTCCGA
TCGCAATCAACATACTTCTCGACGTTCACGACGACCGGGGTCAGTGAAATTTTTTTAATA
CACGGACCACGGGGAGCAGATTGAAAAGAAGATTACCGAAGCGGACCGCGAACGTTGGCT
TAAGCCAGGAGTTATCAAGTAAATTGTATACGAGTTAATGAAGCACACTCCGCTTAATAG
GCACTCGCTTAAATATTAACCACGATACTCCCG
>LINE_comp10860_g1_i1
CGCTGTTTTTTCGATTCTATGTGCAATAATGCTAACTAAATTGATAAGATGCTTTCGTAA
GATATAATGCACTTTAGGTTCCTTTTTAAGCTTTATAAAATTCATCGATTCTTTCAACAA
GGAAACTTATTATTTCGATTGTCATTGCTGCACTTTCAATTCGTGATGCTTTGTTGTGTA
TTCTTCTTCAGTTTATTAAAAATTGTGCAGAAGATTAGAAACTGAGTATTTAATCAATGA
ATAACGTAAAACACAAAAATTATCTTGATCTTAGGAATACAACTGAAGAACAGCGCCAAG
ATGTTTGTATTTCTCTGTTCTACCTTCGCGATGTTGTTGTGCGCGGGTTATCATTGGTCT
ACCAGTGATCCGAGCAAACGAAAAGGAAATAACGTATTCTTCTGGTTTTACTTCCTGCGA
AGTTCTTTTGCGGCATAATTCAAAAGGGAAACCAACACCATGACGATGTTTTTAAAACAG
CAAACATGATCGATTTACAAAACTGTAGCGAAAAAATATACACGTACGTAGGTCTTGTTT
CTCCTATACATTATATCCAATAGTATATATACATTTCTTATTATAATACATTTAAGACAT
GTGTACCAGCGCGAGAAGAAGCGCGCGCTATGCGAAATATTGTGTGAATCAATAGGATAC
TTTCTCGTTTAAAATTGACTGAAATAGTGGAAAGTTTGATCGAAGCAAG
>LINE_comp11018_g1_i1
ATTATTGATATCAAGTGTTTCAAATTTGAGATAAATAATCGATTTATAAGACATGTCATC
GTTGTTGGAGAGTACTTAAAGATACTAAACATAAAATACTCCATATCTTTACACGAGTAT
CCGGTTTCCTTCCCTCGGAAACCATTGTTTTTGCAAACTACACATTGTCTAGTTGGATGA
ATTCTTTTTTCGCATAAAACACTTCATATCAACAATAAAGGGACACGAGATATTTCGTCC
ATAGCATCGTTTCTGCGACGTCATGGTGATCGTGTATAGCATCGTTTCTTCGACATCGT
>LINE_comp11102_g1_i1
GAGTGGCATCGTAAAATAGAACGATTAGAGGCAACGCAAAAGAGGAAATCGAAGGAAGCA
AAAAATCGCGAGTTCTTCGAAAAAGTCTTTCCTGAGTTACGAAAACAAAGGGAAGACAAG
GAGCGTTTTAATAGAGTTGGTTCTCGTATCAAAAGCGAAGCTGATCTAGAGGAAATTATG
GACGGCCTTCAAGAACAGGAGGTATTTCATGCAGTTTGACCCTGTGTAAACTATTTGTAC
AAGGGATTATTCTGATAATGCTTTCCCTGTGATTGTATTTTTAGATGGAAGATAAGAAAA
TGCGGTCGTACGCAGTGATACCTCCGTTATTATTGGATGCAAAACAAAGACGAATCGCGT
TTCAGAATCGAAACGGTCTGCTTCAGCCAGAAGAATTAGAGGCTCTTCACAGCGAACGGA
AGTGGATCA
>LINE_comp11294_g1_i1
ATCACCGCGACGGAGAACTTTCATTCTGTGGGATTTGTCCGTTGGCCAGCCGAGCTAACC
CAGAAAGCCGACTGAAAGCGAAATAAACGAATCCGGCCGGAAGCTTCGCCGTATTTCACC
TCTTCTTCGCTGCCAGTAATTATTTCGCGTTAGCCGTGAAAATTCTGATCAGCGTTTGCT
TTGATTCGCGCCTCTCCCAGCCCTCGCACGAAATCAAATTGATTGAATTGATCAGCCGAG
ATCGGTGCTTCGGAATTTATTCGAAGCGTCATTTTGCATGATTCCATTCTGATATGTCAA
CGTTGAATTATTGCGGTTGCTGGGTGAAATAATATGCTCCCGTTGGGATCAATTTGCCGG
ATAACTTTTTCTTTGTTGTTGCGGAGTAAATAGTAGTAAAAAGTCTTCAACTCGTTGGTT
TACAATTTCTATGGAAATTATGTTTGTGAAAGCTTTCTTGTTGTTAACGATTTCCTCTTA
AAAGTGAAGCTCATCGAAAGGTACTTAATACTAAGTGCTATCGATTATTAGTTACAAAAC
CGTACAGTTGTCTCTTCAAATAATATTCCAATTAATACTAGACAGATCAATAATTAAGCA
AAAATACATTTTTATAACCTACAACACTTTTATAAACGTGTGGTCTCATAACATCCCAAT
ATCTTCCACCTGTATCGTATCTTCACACCTCATACGAAATTACTAAAATTTTCCTGCATT
ATTAAATAAATCCTTCAATTGGAGAAGTCCTACAAAATAAACTAATATACCTTCATAATT
CTAAAAACTTCTAACGCATCTCGAAGTCCCCTAAAATTTGCAAAGCTACCAAATTGTTTA
ACCAAATGATTATAAATCCGCACCCTATAAAACTCTCGAGATTCCGTCGCAGTAAAATTC
TGCCATTAACCAGCGCGGCTTCTGTACAGTCGACGTTGTCTACGATCGTAAGAAATTAAA
A
>LINE_comp11420_g1_i1
ATGCTCAAGGGTTTGGACGCGGTATCGAATGCGAGAGGATAGCCGAGAAATCGGAGAATA
AAACGAACAGTAGGTTTTACCGTTTAAGTTAGCGCCGGTGCAATGCTCGTGAAACGAGTG
CACGTAGCTTAAGGAAAAGAAAAGGAAACAAATACTTCGGAATTCTATACATACATGCAT
ACGTATATACATGTATACATATACAATTGTACAGAAACGTTCTTCGACCATCGTAACACG
AATGCATCTCGTTTCTCTTTAGCCATATCGAACAAAAAGCGTACGTAGTGGTATTCTTTC
CGAACGAATCACTTCAAACGCGATCTATTCCTATAACTAGCAAGAACGTTTCTCCCTCTG
CCTCTGTACCTCCTTTCTTCCTCCCTTCCTCCCTTCCTCTCTTCCCCTCCTCCTACCGTT
CCTCTCTTCCTCACCGATTAATCGGGCAAAACTCCTTCTTTCGACTAAAGTAGCTAGGGA
GGAGCAGCGAGTATAAAAGAAAGAAAAAAATATGAAATCTGCACTGTGCACTCTCGTGAA
TTGAAGATTTTATCGTAATCGTAGGTGTAGCGATTAGGCGAATCGAAAGTCGGATACGAT
GATTCTCATTGCTGCAGATGTTTCCAAGTAAATACCTACATAGTCGCGCGACTGATCGAG
GAGTCGTTTCATGCAGGCCGTGGTCGACCAGTTGTTTAGCCC
>LINE_comp11514_g1_i1
TTTTTTAGTGTGATGGTAGCTTATTAGCAACTGGAAGTTATGATGGTTACGCAAGAATTT
GGAAAACAGATGGTAGATTAGCTTCAACTTTAGGTCAACATAAAGGTCCAATTTTTGCAT
TAAAATGGAACAAACGTGGAAATTATATTTTAAGTGCTGGAGTGGATAAAACAACGATCA
TATGGGATGCGGAAAGTGGACAATGTACCCAACAGTTCAGTTTTCATTGTGCACCTGCTT
TAGATGTCGACTGGCAAACAAATACATCATTTGCTAGTTGTTCTACGGATCAGTGTATTC
ATGTGTGCAAACTTAATGTTGATAAGCCAATCAAGAGCTTCCAAGGTCATACGGTAAGTA
AATAGAACTAGTTAATAGAAACTATATTTTTGGTATAATATTATTATATATATTACCTGT
TCTATAAATTACAGAATGAAGTTAATGCTATTAAATGGGACCCTCAAGGCAATTTGTTAG
CTAGTTGTTCAGATGATATGAGTCTTAAAATCTGGTCTATGAAACAAGACACGTGGGTAC
ATG
>LINE_comp11537_g1_i1
AAGCTAACTTACGCGGAGGTGATGTCCACTGCTAAAGCCAAGATAAGCTTGGCCGAGGTG
GGCATCGTCTCTTTGCGTCTGAGGAGGGCCGTAACGGGGCTCTAATATTAGAAGTCCCTG
GCAAGGACGAGGTGGCGAAAGCCGACCAGCTCGCCACGAAGATTGCGGAGGCTTTGGAGG
GGACGGGGGTGAAGATGGTCCGTCCATCCAAGAAGGCGGAATTGCGAGTCCGCGGCTTGG
TGGACGGGACCACCCCCTCAGAAGTGGCGACCGCCGTCGCGACTGTTGGAGGGTGCCGGC
CCGAGAAGGTTCAGACTGGAGAGATCCG
>LINE_comp11547_g1_i1
AAAGTCGCGCGATCTCCAGCCCCGAGGTGAGGGTTGGAGTAGTTCTGGCTGGTTTCGAGG
GCTCGAGTCCTTTTCTCTTTACCTTTCCACCCCTCGAGGAGGATGAATGGGCCAACGAGG
GACTCCTGACCTTTCCTTCTGCTGTTTAACCCTTGTACAGACCTCGAGGAACCGCTGGCA
AGTGGGTGACACGCTCGAATCTCCGGATAGGGGATGATTTCCTTCGGAGCCGATGGTTAA
TCTTTTATACGCGACGACGAACAGCTTCTTTCGGGGATTCCTTCGATTGCTTCGTGAGTC
ATCTAAGTGTCGAACTGTTTGCTTCAGGGGTGGGATGTTGGGGACGTTGAGATAGGGGAT
GGTTTAATATGAAATAGACCGGGTTTAAACTTCAATCTTTGGAAACCGAAGCTCTGCTTT
GGAAATTAGATAATTTGACTAAGCTACTTGTTTCGGTTGAAATCGAATTGAAAAGAGAGA
GGAAGGTCATTTCAATCAGGTACTCTATAGAAACTAGAGGATTTATAAATCATTT
>LINE_comp11906_g1_i1
ATGGAAGTTGAAGATTGTCTCCTTACAGGTGTGGTACATGACAGCTGTATTTTTGAAATT
AAGTGCCCAAATTTTGATATGTATTAAATTGGAAGTATCTCATTGGATCCTACCAGCAAA
AGTTGTTCTAGCACCGTTTTGGATTCTTCTTTCAGCATTGGCAGTTGATGTTTTTATACA
TTTGATACAACAACATCGGTTTTAATGAAGGCCTAATCTTAATTGATTCAACCAATGAGC
AACTGCAGCATTTGTCACACTTTATATAAACATAGTTTTATATTGTCATTAATTGTATAA
ATGTGTAAGTTGTGTTTATGGTACATATAAGATTTATATTAATACATTTATTATTATTAA
TTTATGTTGCCCATATCTCTGAGGAATACCCTAGATCAATTATTTTGATAATAAAAGTTA
AAAGCTATTTGATTGGTAACTTAAAATATATTGCTATACCTTATAACTTAAATATGCATA
TCATATGTA
>LINE_comp12323_g1_i1
AGGAATTTTAATTAACAAAAAAATAGATCACACTATAATCGAATCCACGCAACAATACAA
TACACTTGAAACAACTAAGGTTAAAACAAGTTTGGCCGGTAACCACGAATTAATTATAGT
AGCTTTTTACGCAAGGAAAAGCAACAGTACCCAATTTAAAAACGAAATGGATAAGTTATT
CACGGAATTAAACTTGAGTTCAACGTCGAAATACTATATTATAGCAGGCGACTTTAATGC
GAGACACACATCTTGGTCTAATTCCTCAAACAGTAATAGAGGAAATACTCTAAAAAACTG
GATCGACGAAAATGATGTAACATACAGAATTAACCTGCTCCACTCAGAATTTCCATCATA
TCCCCGAAATGGATCATT
>LINE_comp12504_g1_i1
ATGCTAAATAGGATGGGGGAATTGACCGTTCCTTGTTGCAGTCCATTTCTTATTGCAAAG
GTTTTCTTGGACATACTTTGGTTGTTCGCGACAATGAATTTCTTATCGTGTACCATATTC
CAGATTATTTTGATTAGGTGTGGTGGGAAACCCTTCTTTGTTAATTTAAAGAAGAGGCCT
TCCAGCCACACCGTGTCAAACGCTTTCTCTAGATCTATGAAGAGCGCACCTACGCATTCG
TCTGCGTTTCTCGCCCAGCAGATATCTGAGGTGAATTTCGTTAGCGCGTGTACTGTAGAG
TGTTGGTATCTGAATCCGAATTGTGTGTCTGGGATTATGTTATTCACTTCGCAGAATTTG
CAGATGGCATTATTGATTACCGTTTCGAAGACCTTACTTATGTTCGTGAGAAG
>LINE_comp13068_g1_i1
TATTATTATCAATAGTCATTGTTATTCTAATTATTACTATCAATAGTCATTATTATTCTC
ATTATTATTGTCAATAGTCATCATTATTCTAATTATTATTATCACTATTACCATTTTCAA
TTATTAAGTTACACAACAACACACATATTTACGAATTTATTACACAACTTTAACCCTTAG
AATACCAACGTTATGAGCTTCGCCGAAAATTTCTCCAGAAAACATCGCTCCCAACTCTTC
ATTTTTGATAG
>LINE_comp13251_g1_i1
ACCGAAGTCTATTCCCAAAATCACTAGGTGATGTTTCTGCTATCATGATTTTGGGCATAC
AGCCCAGGCATGTCTGGAGAACCATAAGGCGCTGCAGATAGGTAGGAGATATGGCCGAGA
AAAGAATTGATGAATGAGCTGTATGTGAAGACCCCAAAAGTATGTGAATGAGAAAAAATT
GCGACAGCGTGTGCGTGTTGTTAGTAGAACTAACAAGAAAGATGCGAGTGTTGGAAATGT
AGTGATTCAAATGAGTGCGAGAATGTATGTGTTAATGAATGAGGGACGAATGTATAGTAG
ATGGCGTTCGTGTAAGTTGTGTCAGTTCGTGAACGTATTGCGTTGCCATAAATGTAGCGC
GTTTGGTTATATGGCCAAGGAATGTAAGGAGAAAGATGCCTTGTACCAAAGATGCGGAGA
GAGTGGTCATTTGAAGAGTGCATGTGGAAAGAATGTATATTGCCGTAACTGTAAAAGCAA
GGGAAATAAATGTGACCACTCAATGACGTCCTTAGAATGTCCTGAGTATGTAAGAATGTA
TGG
>LINE_comp13286_g1_i1
TGGTGGCGGACAAGCCTACCCGGCTCCTTCTGAGCCGGCTGTAGAAGCTGTGCACCATCA
GGATTGTTGGAGGATACCGCACCCTCTCGTTTGGAGCGGCCGCGGTCCTGGCGGGACTCC
CGCACTTCGACGTCCAGGCCCTCGCTTTGCGAGATATATATCTCCGGGCGAGGGCTGGGG
CCAGGAGCGTGGATACCGGCAGGGAATGGCACCCTGACACCCTCGAGTCTGTATGGAACT
CCAGGGACCAGGTCTGGCGGTGCGTGTGGGAGCACTGGCGTCTTCGTCTTTTAGACGCAC
CTTCAGCATGACGCAGGTGCTCACCGGGCATGGTAGCTTCGTGGAGTTCCTGTGTCGCAT
TAAGCGGGAGCAAGACGCCCGATGTTGGCACTGTGATGGGGGCCAGGACCCGGCGCAGCA
CACCTTGGGGTTTTGTCGAGCGTGGGCTGACGAAGGTCGGGTTGTAG
>LINE_comp13777_g1_i1
TGTGTGATTTGGGTGTGTTGATGAATGAGAAACGAGTGAATGTGGCCATACTGCAGGAGC
CGTATGTTGCCGTTGATGGATGTGTGAAGGGTTTACCCTTAGGTATGAATGTGTATGTTT
CGGAAGCGGGCCAGAAGAAGGCCGCTATTGTTGTGAATGATGTACGATTGGAGTCCCTGT
GTGTCAGTGAGTTGACTGACGAGCATGGGGTGTGTGTG
>LINE_comp13956_g1_i1
ATCACCACAGTCATAACCATCATCAGCAACAGCCGTCGCAGCAGCAACAACCCCAACAGC
ACCAGGCGCAAAATCAGCAGCAGCAGCAGCAACAGCAAAAACCAACTGATGGTGAGTTAT
TTTTAAATTCTATTTTGTGTTTTAATACATTGACTGCCGATAAATATTGTGGAGTATATG
TTTGTTTAATAACAAGCAAAATTTTGTAGAAATGATGATCAGTACAGAAGGAAGTGTATT
TCTTTAAAGTAATACAGTGATCATCGTATCTGGGTTAGGTCTAAGCACCACA
>LINE_comp14289_g1_i1
GCCGTCTGTTGAAACAGACGATCTAGGTTTTCTCCGGGGTTATCCGCAGCCCCAGGTCGT
GGATCCGCGTGACGACGGCTTCCACCGCGACCTCCGCACGACGGATGGCCCTCCCGAGCG
TCTTCCCGACGGCCACCACCAAGGTATCGTCTGCATAACAGACCAAGGTGGCTCCGTCGG
GAAGCGGGGCCCGCAGGACCATGTTATATCCCAGGTCCCACAGGTGCAGTCCTAAGATCG
ACCCCTGCGGGAGTCCACGGTCCACCTCCCTCCGTATCAGCCTGCACCGGCCTGGGTATA
CTATATCCAAAGATATAGCCAAGCACACCCCTCTCGGGTTGACGGCAGCCTCCGAGAGGT
CCCTCACTTGATCCACCGCTTCTATAGTGGATCGGCCCTCTCGGAAACCATATTGGCAGT
CCGCCAGATCGGGTCCGTCGCGGGAACGGTTCCATATTGCCCGCCTCGTCTAGCAAACGT
ATCGGCCGGTACGCAGAGGGAGAATCCGCGGGCCTTCCCTCCTCCTTCAGGAGGACCATC
CGCCCCTTTTTCCAAAAGTTGGGGATCATCT
>LINE_comp14500_g1_i1
GTTCGAAAATTCGCTTGTAAGATGCGCCAATTCATATATTTTTGCCTCCCCAATGAAACA
AAATTAAGTTACACAATAACACAAAACATCAAACATAAAGTATCAAGAAGTAACATCAAT
AACCCCCAAATTCCTCGAAAATCTTCTAATTAATAGGCTCTAAATATAAACAACAGAACA
ACACCTGACTCAGGAGCATCAACTTGGCTTCCAAGAATATCACACAACCACAGAGCACAA
ATTTATAGAGTAGCCAATAAAATCAGGAAAGACCTGAAAGCTAAAAAATATTGTTCAGCA
GCGTTTTTGGACATCTCCCAGGCGTTTGATAAGGATTGACACGATTGGCACGTTGGTCTG
CTATTTAAAATTAGAAATCTATTGTCATCGCCCTTTCATGCTTTCCTAAAATCGTATCTT
ACGGATAGATTATTTCAAGTTGAAAAGCATCGGCTGTGTTGAACGTGTACTCTATCCAAG
CTGGTGTTCTACAAGTATTGATAGATCGATAAAAGATAAGAGATTAGGAAACGAAGTAGA
GCGAGGATTCGTTGAAGTGTTTTCTTCCTTCACTTACTTCATGTTAATATTTCATTTCTA
GCTCGGAAGAACAATTTGTAGTGATTTTCAATCGTTGACTTTCACTTTTATAATTATTTG
CCTCCGCTATCAGTAGAATACGATAAAGCAATGTAAAATTTGAATCCTTTCATCAACAGA
ATTCTGCGGTACACACCTCAATCTCTATAAAACGGAAGGTGTAGCATTCACATGTATGTG
CGACAATCATGACAACACATTTATTTCCAT
>LINE_comp14566_g1_i1
CTGGTCCAGTATTATGCAGAGATGAAATGGAAGAATGGAGTGCATCTGAAGCTAATCTTT
TTGAGGAGGCTCTTGATAAATATGGCAAAGATTTCGCTGATATTCGTCAAGATTTTGTAA
GTATGCGCTATAAGATAACTATCAATAAAATTTTAATTTTAGATCGGTTTTTTTGCAATA
AATATGTTAATATTTCAGTTGCCGTGGAAAACTTTAAAGAACGTTATCGAATACTATTAC
ATGTGGAAAACAACTGATAGATATGTACAACAAAAGAGGGTAAAGGCTGTAGAAGCTGAA
AGTAAACTAAAACAGGTTTACATACCAAATTATAATAAGACAGCTCCACCTACAACTGCA
CCTTCCGCGGCAACAATTGTACCTCTCGGCAACAATAATAGCAACAGTAACGGAAAACCA
ACCAGTGTTCTCAATGGCAATAGCAATGGTAGTATGGCGACTGATAATTCTGGTATACTG
ATGG
>LINE_comp14579_g1_i1
AAATATTCGGAGCATCTATATTTTCATGTCGTTGAGCAGGCCACTGGACCGGTTTACCTG
TTCACAGGGGCCTGGAACTTGCAGGTAGTTAACCGCGTGTAGGGTTCGCGCGGTTTCTCG
TCCCGTTCCTTTTTCATCGTAACTCTTCGCCGCCGCCGACGTAAGACTCCGTAGGAGGAT
TATACATACGCGGTATACACGATATTTCTTCCGATCGCGCGCAGTCATGTTGATTGTCAC
GGTAATTTAACAAATTTTTCGATCGG
>LINE_comp14840_g1_i1
AAATCACGTCGAAAATCTGCATCACGAGTCTAACATGTTATAAGGCAAAGGGTTAATTGT
TCCGTCGTCGGCGTCAGGGTATCGACAGAACCGTGTTCAGGGAGTTGCTGCACAACACGT
TCAAAGTCATCACAGAGGACGCGCTGGTGGAGCGTATATACTGCTGCTGGGATCGGGAGA
ACGAAGGGATCATCCGGCTGGAACCGTGGGTGATGGGCCTGGACCTGTATCTCCGAGGCA
GCCTGCGTGAGAAGATCGAGTTTTGCTTCAAAGTTTACGACCTGAACAACGACGGCTTCA
TCGCCAGAGACGAAATCTTCCAGTTGTTCAAGTAAACCGTCGTTCCGACGCTAAGTCCTC
TTACCTGGTACACACTTTCCGACGGAGTTGTTTCGCGTCCGTAGGAACTGCATGATGAAA
CAACCGGGCGAGGAAGATCCGGAGGAGGCGGTCAGGGATCTGTCGGAATTAGTGTTGAAG
AAACTGGACGTGGATCGTGACGGGAAGATTTCCTTTCAGGACTACAAGGTGGCTATTACC
GGGGAACCGTTGCTCCTCGAGGCTTTCGGACAATGCTTGGCCACGGAGGAGACGTGCGCT
TGTATTCTCGCCACGTTACAGTAACGGGCCCGGTAAACGTTTCTTTAACGATCTTCCGGC
GCCGCAATTAGGGAACCTAGGATAGACGAAAATGCAAAGGTCGTTAGGATTTCTGGAAAC
GAATGGGTACACTTTCGTAAAACGGTCGATCCGTTCGACAAACTTTGTAATCATGGCACC
TGCCGTTTATTAAAAACAAATTCGATAGTAACCGTAATTACAAACAATAATAATATTAAT
AATAATAATAACAACAATTAAACTTCCTTTTATCCCCTTATTTTTTACTTGTTCTATTGT
TTGAAATAGAACATCTTCTCAACCCTATATCTGGTATTTTTGCTTCTATTACTTCATTAT
TTTCAATTATGTACTGCTGCAGTAAACTACGGTAGTAGAATTATGCTATTTTCTCTTATC
TTTCTTGAACTTCTGAACTCCTCGTCGATTCCTAGAATTACGTGAATTCTATGTACTCCG
AGTTACCCATGATGCGTCATCGATTGGAATGCGAAATAATTTTATCTGATTTTAAGTATT
TCTCTTCATTGTAACAATCTTCGTTTCACTCGGTTCGTCGTTTTTCCGTTACGGTACAAA
TGTTTTCCGAAGGAACTCACTGCAGTCGTACTCGTACGACAGTAATACTTAAGACGTCG
>LINE_comp14842_g1_i1
CAGCCGTGTGCTCTTCCGATCTAACTACGCGGCTCCAATGCGCAGAATGAGAATCCGATG
TTGTCAACTCAACATATGGTGTGAAACAGGGTGACCCAATGTCTCCAATTATATTCAACA
TGATGATTGATCGACTTCTCTCTAAACTTCCTAAAGAGGTTGAAGTACGTGTCGACAACA
CTGTGATAAACGCCATCAGTTATGCCGCTGATATCGTTCTATTCGCATCGACATCTCATG
ATACTCAGTTGTTGCTCGACGCTTCTGCACAATATCTGCATGAGTGTGGTCTCCAAGAGA
ACGCGACGAAATGTTTTATGGTGTCCGTTAAATCTGTTCCTAAGCAGAAGAAACTGGTAG
TTGATGCGAGCCAATCATTCCACTGTCATGCTCGTCTTATTCCAGCACTAAGACGAACAG
ATGAGTGGAAGTACTTAGGAGTTCCGTTCAATCCTGAAGGTGGGCTAAGGATAGATACGC
GAAAGCAACTCCAGCG
>LINE_comp15038_g1_i1
ATGTAGAGTGTGACGTTATGAGTGTGATGCGTGCTATTGGTGATCGTGTGCGTAAATGTG
TGTTGAGTGATACCAACCGTGTCAGTAAGAATGTGAGTGAGATTGTTTTAGGATGTATGA
GTGAGTACGAACAGTGTTTAGTGAAGCTTATGTGTGAGAATGAGAGATTAAAAGGTAGAT
TGGATGAATGTGTGAAGCGTGAGTCTGTTAATGTATGTAGGCCCGTCCAGAGTGTGAATG
ATAAATCGTATGCAAGTGTCGCGAGTGTGAATGTGAATACGAATACAAGGACTGTGAGGA
TGAGTGAGCCGATGTTGAGAGCGAATGAGAAGCGGTTTGCTGTTGTAATCAAACCCAAGG
ATGAGAGTGCAAAAATGACCAGTGAGCAAGTGAAGGAGCGCGTGTTAAAAGAAGTGAGTG
GATGTCTAAATGTTCGTGTGAAAGCCGTTAGGAAGACGCGAAACGGAGGAATCGCCGTCG
AAACGGTTAGTGCGAATGAGATGAAGAGAATGAGAGAGTGCAAGAAGTTTGAAGAAATTG
GTATGAGTGTGAATGAACCGAAAAAGATAGGAGCGAAAGTAATGGTGTTTGATGTGCCGT
GTGAGATGACGAATGATGTGCTAATGAATGAGTTGTATAGTAAGAATCTGAGTGAATGCG
TTAGTGAGAGTGAGTTCAAAGAGCGTGTGCGTGTGGTCAATAGGACTAACAAGAAGGATG
CGAGCGTGGGAAATGTTGTGTTAGAGTTAAGTGTGAGAATGTGGAGT
>LINE_comp15088_g1_i1
TAATAATTTAATTGATACAGTCAGCGCGGAATGGTTTATTCGAATTAATTAACAGGGTAA
TTAAGTATTAGACGTTAATGCTTCAACGAGATACCTTAACGCCACCTAATTATAAAGTTC
AAGAATGTTAATTCGTGTTCAATCAACGTCGACTCCTCAATCGGCGTACGGTACAATTCC
GAACTCAAAAAATGTATAAATGTCTCCCCTGACTAATAAGGCACAAAGTGCGATTTTTTC
ATCTCCCATCCAACGACCGTGCAGAAGTTCAGGTGAAAGTCCGTTAATTGTAAAATTACG
AGAACGCACTTGTTCGTTTTATGCAACGAACGCACGAGAGTTATCGGAGATATTGAATTT
TTCAATCGCGCGTGGAATCGTACGTTTTCAGAAAGAATATTCAGGATGGATTGAAATTAC
TGGAAATTTCGCGCGTTCGCGGAAGACACGACGATTCGTTAACAACGAAATAGAAGCTCG
AATAAAGTTTAGTCGCGCGTTCCGCCGATCTTCTCGTTGCAACGAAATTCCTGGCGGAGA
AAATAAAGCCATATTTGATTGCTGTGCCCGTAAATTAGTCCACGGACGCTGGAATTTGCA
TAAACATCCGCATTCTCGCTTTCTACGCCGAGGAATCGAAAGAACTCTCCGCGAATCTCC
ACGAAGACGTTGCATTTCGATCGACGGACTTTTTAAAAAAACGAGCACAGTGTTATCTGT
TTGACTGATTAAAAACCAGGAGGAAGAAATAAAAACTGAAATCTAATCGCCGGAAAGAGA
GGAGCTTCCGATGGCTTCGCGTAAATGAAATTCGCGTGACGCTTAATCGGAGGCAGAACC
TAGAAATGGTTTCTGCAATTAACGTGCACCGAATATACAACGGGCCGAATGACGTAATGC
GATAATAAAACTGAACGTCGATGCGAATTGTTTCGACAATGGATTGTTCAATCGTTTTAA
TAAAACCGAGAGACACAAGGTGCGCGCAGTCTGCCGGAAGACAGCCCTCCTGTCGATTTA
CGCAGGAATAACACTTCTCGCTACGCCGGACTGGATTCGCGCGAATTTCGGGAACAGGTT
CGTGAAACGCGCTCAATTACAAAGCGTCCGGTCGTCTGTGGCTTTCGTTTCCTTTAGAAG
ACAATGGAATTTCGAAAATTCCGGCAAAAAGTTGACCGAGCACCGTTA
>LINE_comp15246_g1_i1
GCGAGTACATTTACTAATCTAGCGTCTACCGTATAATGTCTAGCTTAAAACGCCTTCTTC
AAAGGGATCATCTTTCATGATCATTTCTGTCGAGGATCGAACTATCGAGGGGCAAGCACA
CCAATACTAAAGCTACGTATCGAAGTGAGGTACTATCTAAAGCTACAATATTTGTGTACG
AGAGAATCAATACTGCTGCGCTTCAATCTTTCATGTGAAATCTTCATTAAAAGTTCCGCT
AAATTAGGATGTAACAAGATTGATTCTCTCTTCGAACGTTCTAGGGACCTTTCAATGTTT
CCTTCGAAAAAGAATATCTTAATAATAATTCATACAGCTAAGCATCTACGAACAAATATT
CGAGAAGCTAAAAGGAAATTAAGATTCTAACTGTAGTATATTTATTGTCTGACGTCTCAC
CTTGTCTTCATCAGTGGTATCGGTTGCCA
>LINE_comp15257_g1_i1
AGACTGACGGCGGTTCAAAGGAGCCTACAGACCTGTTTGCCAGAGGGCGTAAGCTGGTTT
ATGAGTCGAAAAGGCGGAGCGAAGAGACCCGGGGGCGCTGGACAGCTAGGCTGATCCCAA
CCCTCGCCCCCTGGGTCAGTCGGAAGCACGGCGTGATGGACTATTACCTCACCCAAATCC
AGAGCGGATACGCGTACTTCCGGTCCTATCTGCACAGAATGGGTGAGGCCAACCTCTTCG
AGTGCAGCCGCTGTACA
>LINE_comp15428_g1_i1
ATGGGATCGGCAAATGTACGAAGCTTGTGGGGGCAACGGAATATTTAGCATGCTGATCCA
CATTCGGTGGAGATAGTATCGGTTGTTTACTGATTTTTGTGGAATTAAGTGTACGTTTCG
ATAAACGTTCGACCGGCGAGAGGGGGTAATAATTATTGGGCGAGGAATGTGGAGTAGAAC
GTTGAGGGGTGATTTTTTGGATTCGGGAGAAGTTGGGATGGGAGATACATTGAAGTTAAT
TAATCGATGCAATTTTCTATCGGTGTACGTGAGTGTAATAGAGATATATTACATACAATA
TAAATGATTTAGATATTACGAAGAAAAAGATGAAGGATTGTTTTACAATACTTTTGAGAT
TTCATTTAAAATATTCATGAAATCACTAATACAGAAAGTGTATTCCTCAACGAAGGTGTA
CAATAAAATAGACTTTCAAGGAGTTCAGAATGAATGATATGATTTCATTCTATTTGTCAT
CACTCAGGAATGAATTCCAATATATTCAGTACAGAAGGATACAAGAGGGACGAAGAGAAT
GGAAATGATCCAGTACTAAGGAAACACTATTTCACTTTACAAAACATAGCAAGTATAGTA
ACACTTAGCACATGCAACATAGTACCAATATGAAACAATAGATATGTCTAGCTAAGCTTG
GCTAGAGCCTGTCTTATCCAATTAATGTCAATCACATCGACACCCGATAGAAATCCAGGA
CATTCACTGAATTTTATATTTCTTGGCATAAAAGTGGT
>LINE_comp15527_g1_i1
GAAGGGACAGGTGGTCGACGAGGCAGGAATTGACTTTTCTTTCGAATAGCTTTCCCACTA
CGTCGAATAAGCAAGTTGGCCTATAGGCCGATGGCGTCCCGGCAAGCCTTTCAGGCTTAG
CTACAAGGATCAGCCGAGCCACCCTACTACGATGTTGAGCGTTCGGGCCGCCATAATCTC
CGTCGTAGGAGGGGTGGGCAAGGCCTGAGCCTCTTTATAACCAGCTTGTATGTCTGACTC
CACCGAGGAGCTCTTCCCAGGCTCGAGAGCTAGCTTACCCAATGGTGTGCTACGGGACCC
CTACGCCGTAGCATGAGCGTTGAAGTCCGCCAGGACGATAACTGGTC
>LINE_comp15610_g1_i1
CGAGCTACGTCACCCTACGACAAATAGACAATGTTAACCGCGGATCACGGCCGGTCGTGA
TTAAACAAATCAAGTGTTCGTACAGCGGGGAATATATACGCTGCGAGCGGTCGCGTTACA
ATCAAGAGAGCCGCGTGTTTGTTCGGCAAAGTTTAATCCGTTGAACGGGACCCCGTAAGC
TTCCCTGCTTACCGTGAACGGGGCGGAAAGGTTCTGGTGCGTTTCGGCTCACGACAGTTA
AATTGAAAGGCTATGATCTGCTTGACACTTTTACTGTTGTTGATAGATGATTGAGGCTTC
TAGATTCTTAGATTTTCAGATGATTTAAGGCTTCTGGAGTTTTAGGTCCGTAGGTGACCA
AGACTTCTAGATTTCTGGCTTTTATTATAGATAGTTAGGCTTCTGGATTTCTAGATTTCC
AAATTTTTAGATTTCTAAATTTGTAGACTTCCAAATTTCTAGACTTCTATACTTCTAGAG
TTTTAGACCCCTAGACTCCTAGATTTCTACATTTCCAAATTTCTAGATTTCC
>LINE_comp15712_g1_i1
ACGCTCTTCCGATCTATCTGCGAAACTAGTTCTGGGGGAAAAGATTCACTGGAAAATCAG
CGAGGTCGCAAAATTTTATTATTTTCCGAGTGACGAGAAGACGAGTCGCTAGAATTTTAT
GAATGATGCTGTCCGTTTCGCGTCCGAGAAACTAGAAATCATGTTGTGAGAGGATATAAT
TAATTAGCCGGAATGTTTCGTGTTATAAAAGGGCATAATTAATTGCTCAGAAGATTTTAT
ACCGCGAAAGGATATCGTTAATTAGCAAGAAGACTTCAGATCATTTCTTTTGACGAATGA
ACGTTTTAGTTTGAAAATCGATGTACGCTCTCAAGGCTTG
>LINE_comp16374_g1_i1
AAGCTCTCAAGCTCTCTGAAATCTGCATTTCCTAAACAGAAAGTTAAAAGATTCTACTAG
CTGATCGATAGAAAATCTAACTAACTCAAAACCGACTGGACATACGAAATCTAGTTATGA
GGTACTGCTGATAATTTTAATATTAAGATTGTTCAACGTTTCTAATCCAAGATTTTACGA
TTTATCTGCGATACTCCTTGGTATGTTAAAAATGAGAGAATTCATCCGAATGTAAAGATA
GAGTCCGTGAAAGTATGAATTTAAAATTTTAGTATGTAATCGTTAT
>LINE_comp16481_g1_i1
GAGAATTTAAATATGTATATTTTCAAGCGAGAAAAAAGCTACAAGATTTCCAAACTAACG
GAAAATCGTTTCTCGGCGAAAGTTAGAAAGGTGACGAAGAGACGCGGCGACGAAAAGGTG
GAATCGTTTCGAAATGGCGGAAATGTCGATTTCGCGCGGTTAAGGGTACGCGAAGGACTC
TGCTCGACCGGAACCGATCTTACCTCGATAGTTGAGGGGAGGCTTGGCGCTTTCGGGGTA
AGGCTTCCACATATCGTAAGAGAACGGATCGGGATAAAAGGCGTATCCGGTGGTCTTAGC
GGCTCTACTCTGCCGTTTGATGTACCTCCACATTGCCCTCAATTCCTCGCACGTCGGTTC
GGACAGGTCAACGCGCTTCTCGCCAATCTCGCCGGTATTTCCCGACTGTGTCGAGATCGG
ATCGATGTATCTTGTAC
>LINE_comp16488_g1_i1
GTTAAAGACGAGTCCCGCCGCAAGAATAATTCTTCGGAACGGAATGATGCTCTTTTCGAC
ACGATCCGTGATCAGGATGAAGGACGTTACGCTCGAAGAATTCCCTGGAGATGCTCTCCG
TTTGATTGGCTAATTTATTCCGGAGCCGGCCGAACGGCCGTGTGTAACGTGAGGGCAACG
TGGGTGAGATATGCGGGCAAGTGTGACACGATACCGATTCCACGCTTAAACTGATGTAAT
CGGTGACGTCAGCGGCCGTTTAACGCCACGAGAGCGCCGTGATCATTGTTTCATGCGAAA
GAAAGGTAGTTATTTTCTCTGGGATTCTATATTACAAATCATTTATACGTCATCGCGATG
TCTGTGTTCCAAGGAATGTGTCTTTGACAGGAATTTTGTATAGTTCGCAAGATTCTGAAT
ATTACGGAG
>LINE_comp16666_g1_i1
GAAGGCTATATTACAATTTATATTGGTTTCTATATATATTTTAAACTGAGTCCAGTTGGT
ACTGCTATTGTATAAGTGTACTGTTTCATTTGTGCGTATTGGTTTGAACAAATAATTAAT
GAGGATTGGAGGATGGTCAGAGATAAGATCTAAACAAGACTGGATTTCGAACTGATATTT
AAGCAGTCCTTTGATTATTGCAAAGTGCAGTAGGTCTGGAGTGTTTCTTGTGCCGTCAAC
CAGTATGTTGGTTCACCAGTTGTAATTGTATTTAATGAAAGTTTTCGTATTGTATATTCT
AAAATTTTTCCTCGTGGTAAATTTATTTTGGAGCCCCATAGGTTATGCTTAGCATTATAA
TCGCCGTCAGCGATAAATTTGTTCCCCAATGAATTAAAAAAACTTTCATATTGATACACA
GATATTTTTTTATTTGAAGGACTGTAGATAGCTGATATTGTAATATTTCCTTTAGCAGTG
TTTATATTTACGG
>LINE_comp16826_g1_i1
GACTCAGTAATCTTTTTTTATTACTGATAGGTTAAGTGCTAATTATTATTGTTTGTGCAT
ATCTTATTTCTTTTACTGAAAAGCTTCAATTTCACTCAAAAGCATCTGTTTTTGGCCTTT
TCTTTGATTTAGGGGAAAGATACATGTTCAGAGACGAAAGGGTTAAGGTAAACGTAAACA
TCGAATGAGCGCGAAACATTTTTCCTTTTCTGATGAATTATGAACAATGAAATAATTGTA
TCCGGTGCAATTGTAAAAGAAATCATAGTGTAAAGAGTTAATCGTCATAGTTTCCAAGGA
AAATGTCAGATCACTCTAGTCCGAAACCTCATGCGTATACACGCCGTCCGAAGCAAAAAG
GAAGGGTGGAAAAAAATTATTGAATATCAATTCCGAAGTAATTACGCCAAATGAGGGAAG
TGCAGGTTTCGTGCTATTGGTTTTTCATTACTGGACTTGTTTTACGC
>LINE_comp16922_g1_i1
TCATCCGTCCAATTAACGCGAGCCTAGGACCGCTAACGCATCGCTGTGGGTCTCGACTCG
CTCCGACCTGCCAGGAATACGTAAAGATAATCCGAAGTGATGAGGACTTAATTCTTGGCT
TCCTCTGCGAGCTTTTCTATAGCTTTCCTCGACCTCGCGATAGAGGACATTCGATTAATC
GAGTTACGACCTGTAGAATACATAAATGAAATCATAGTAACTGTGTTTCTGAGAATCGTC
TTTTAATAGTCTCTAGGTTTGCGGAACGCCTCGATTTGACGCATATTGACTCGTATAAAC
ATTGTTATAACATTATTTTAATATGTATTCCTATCGTCTATTTTCAAACTTCCAATTCCC
AAGATCTAAATGAATGCAACGTCAGTCTCTCAAGAAACCATAGATTAAACAATAACAAAA
CCTTGAGTTCCATAAACCTTCATTGACAATTCAACGAGGAACATTATAAATGAGCAATTC
GGCTGGATTACTCGGAAAAACCAAAGACTTTGCAATATAGGAATCCACGCCCAGCGTTTC
TCCTATTCCACACTCGTCTCTTGTATCTCTAAACCGCCTCGAATATTCCGTATG
>LINE_comp17024_g1_i1
GGCCGTGGCCAGAAAACTGTTTATAGCTGGCAGTATGACCGTCGGGTGGATCAAGGCGAC
AGTGGCGCCACTGCAGGCTCGACCCTTGCAGTGCTACAAGTGCAGCGACCCGTCCCATAA
GGCTAGTGCCTGCGAGTCTTCCTCGCGGTGTCCAGGTTGTTGAGGGACAGTGTGAGATTC
TTATTCGCTAAAGCTAAAGGGATGTTCCAACCTTGGCCTTAACAGAGGGATCTCGGGTAC
CAAATACCCAGTATGAACCATACGCGACACTATAGTTTACGAGTAAATTACCGGCATGGA
AAGACATCATGCCTCAAAACGCGAAAAGACCCCACGCGGAACACGGGACGCAGCCGCGAA
ATCGCCCCCAGCCCGCGCACGGAGATAAATATCTCTGAGACTTGGGCCTGGAGGACGAAA
GGAGGTAACCCCGCTAGGACCGCGACCGCTCCAACCGAGAGCATGTGGTACCCTCTAATA
ATCCTGATGATGGACAGCTTGTGCAGCCGGCTCAGAAGGAGCTGGGTAGTTCTGTCTGCC
ACCAGATCTGGCGCGAAATTGGGCGCTCCATACAACACAATGGACCGCACCACTCCTGCG
TAAAGCCGCCGCACCCGTCGGGCCGGTCTACCGAGGTTGGGAAGTAACCGCGATAGGGCA
CATGTCAACCCCCAAGCCCGGGGAAACAGCCGAGCGAAGTGGAGCCCGAACTGTCAGTGG
CTGTTCAGGACGAGTCCCAGATATCGCATCTGGTCCCCGACCCGAACCGGGGCCCCTCCC
ACCTCGATCCGCGAGTCGGGCGGCGGTCCGCCCAGACGGGACCGATGGTAGAACCATATC
GCCTCCCTCTTAGCCGGCGAGACCCGCAGTCCCAACTCGCGCATAGAACGCAACAGCATC
CATGCCGCCAATC
>LINE_comp17335_g1_i1
AATGATATGTAAAGTTGAGTAATTAAAATTTGTTTAGGTATGGTGAGTCCTCAACAATTT
GGAGTTGGTGTAGGAGTCGGCGTAGGCGGTGTCGGTGGTGTAGGTACAAATGCGATGGGT
ATGCCTAGTGCTCAACAGGTATTAGCGCAACAACAGCAACAACAACAATCTGTTGCAATG
CAACAACAAATGCAGCAGATGCAACAACAACAATTACAATTACAACAGCAACAACAAGCT
GCTATGGTACAGCAAAATA
>LINE_comp18648_g1_i1
TTTTTTGGATTGAAGTAGGTTCGCATTGTGGCGTTCAGGTTTGTAGATTTGTGGGTTTGT
GGATCTGTAGATTTGTAAATCGCAGATTTATAGATTGTGGATTGCAAATTTGGAGATTTG
AAGATCTGTAGATTTGTGGGTTTGTAGATTTATAGATTGGGAGATCTGTAGATTTGTAGA
TTTGTAGGTTTGTAGATTTGTAGATTTGTAGA
>LINE_comp18776_g1_i1
GAGTACACACAAGAGATCGGCCATTCATTTGTCAAGAGTGTGGAAGATCATTTCCTCTAA
AGCGTCACCTAGTGACTCATAGTAAATTCCATTCAGGGGAGAGACCATTTGTTTGCGAAG
AGTGTGGAGAATCGTTTTCACAAAAGGATCATCTCACAATGCATTCGCGCTTCCACGGCA
GTTTACATCCCTTTGTTTGTCATGATTGTGGTGCAACCTTCCAGAGAAAGTTTGAATTAG
TGAATCACGGCCGTCTTCATGGGAGAGTTCCACACTCATGTACTGTTTGTGGAAAAGAAT
TTCTCCAAAAAAGAACACTGTTGGCGCATATGCGTTTACATACAGGAGAAACTCCATTTG
CGTGCACTGTTTGTGGGGAAGCATTTCCTAGGAAGTCAGACCTTGTTACCCATTCTAAGA
TTCATAACAATAACACGAACACAGATGAGAAGTCGCTTATGTGCAGGTAATCTTCTAAG
>LINE_comp18818_g1_i1
TAGAATTTTGTATGTTGTACAATTGTTGTTGACAATAATAGTGAGGAAAACTAAAGCGCA
AGATCATAAACTCATCCTCTTGAACGTGTAACTTTTCTGATGTATCGGAACTATTCACGT
CGCTCCAACTTTTCCAAAGTACATTTAAGCCGTCGTTCCATTCCCACATCCAATATTGTT
TAACAAAATTTAATGCTGCTCCATTAGCACTGTGAAGGACTATAAAATATAACAATGATT
ATTTTATTTATATATTGAACCAAATGAAGGTTAATTTGAAATACTCGACAACATCAATTT
ACCAGATAGGTCCGATCGCCTGTGCATACTTATTTTCCAATGTGATTTACAAAGAAACGG
TAACTTCATCTTGCTCGTAATAAGATGCGGAAGCGAAATGTTCAATTGAATTGAATTTTC
CGTGGATTTTTCACTCAATCTCATTATGTATTCGTTATAAAGCAACAAACACAAAAGTTG
GGAACCATCGGTCCTAACGGATTCGTTACTTGGAAACAGAAAAACACCTGAAACGAATAT
TTCAAATAAATCTTAAATA
>LINE_comp18890_g1_i1
GGCGAGGTTCCACGTCGTTTTCGACAATTCGAGGGATCAACCACCACAGCGAACGATCGT
GATCTGTGCTGTCGAACGACAACATTTCTATCCGGCTAGTGGGGCGAACGGGTCGTCACT
CGGAACGTGTCCATTCACAAATTAAGACACCGCTCGGAACTACCTGGATCTTCCCTTCGA
TCTTAGAAAACCCTGAATGGCGCCTCGGCTCGGTAGGAAATTATCTGGACCGCGAGTGGA
TCGTTAACATATGCCTTATTAACCCTTTGCACTAGAATAATGAGTCTCGCCGCTTGATTC
GATGTAGTAGATTTATAAAATTTTATATATATATAT
>LINE_comp19006_g1_i1
GACTGGAATGGTAACGAAAGGAGTACAAGTCGAAAGACACTGTACGGTATAGTTCTCTTC
TGCGATCGTTTCGTTTTCGAATAACGCTGGGTTATCTACGAGAAATAGCACCGATAGGAG
GCACGATTATTTAAATATGAAACGTGCGAACTCTAACATTGCTGTGAAATCTGAGCAGGG
TGAACTAAAAATAAATTGGATCGATGGAGATTCTTCTTTTAAGGAATACAAAGACTATCG
AGCCGCAAGATAAGGAAATATACACGTAATACGTTCACGTATGTACACACACGTACACAC
ACGCATATATACAGCGCTCGCGAGCGACTCACGAACACAGAACAC
>LINE_comp19081_g1_i1
AATCGTCTTTTCAATTCTCATGTTTATCCAATGAGGAACGAGGATAGTACTTGCTTCTCA
TTTTTTATTCCTTTTTTGCAACTCTTCTCGTAAAGCGAAAAGAAGTATCTTTTAATTGAC
ATCGACGCTAATATTCTTAATGTGGTAACCAAATTCAAAATTACACTTTCTTCACGAATT
ATTAGAGATCTTAATTTTTGAACACTCGATAGCAGAATAATTTTAAAACAAAAGTTACTC
ATTCAAAAGCATCAAAGTAAAAAATATTTAA
>LINE_comp19266_g1_i1
GATTTATACTGCTTTCATAATGAACGGTTCGTATCCCGGTTGCCCAATATGTCTTAACTC
TCCGCGGTAAATTCACAAAACGGTTCTGCTCGTACCTTATGCCGGGTTAGAAAATCCATG
GAGCCATTGAAAAGGCGTCTGATTCTATCGGGTCAGTCCATATACAATTGGAATATAAAA
ATTACCCATAAAACGGTAAGAAGTTTAACGTACCGCGTTGCACCTAATGAGTCATTGTTT
TGGGACATCCGCGAAAGATCATGTTTCAAACACTAAGTCTCAAAAGATCAGGGTTCATCT
CTAAGCATTAGTCATAC
>LINE_comp19520_g1_i1
TAACAAACTTCGGTATTGGTAATTACTGCGTAGTTGAAATGTAATATCGCGGTGAAAGCA
GAGTGTCTTTCTCCTCTAACGAGTCCTTGATGATAGAATAATTACGGTGAATACGTTTGC
AAAAAGGAATCGTATTACAAGGGGTTAATATTCTGTTCCATCGATTTGTTTATTTTCTTG
TTTCCGAGATAGTACCGCGGCGCAGTGATAAAACCGGTTGGTGTACGGTAACGAAGTGAA
TTGAAATGGATAATGGGA
>LINE_comp19669_g1_i1
GGGAGGCCCGGCCAGAAGGGGGCGGCGGGGGGCAGGAGGAGGAGGAGGAAGATAGCGATG
CGTGGAGCGATTAAGCAGCGTCAGCATCAGCGGCTGCAGCAGCCAACGGCAGCAACGACC
ACACCGGAAAGCGGCAGGAACAACAGCACCGACCACGGTTGCGGCGGGTAACGTGGCTCG
CATTGCCAGCACGCGAGATATCGATCGAACCTTCGCCTTTCACCGGCCATTGTCCACAGC
CCGCTGGTGCCCGCCGTTCGAAATCTAACTGCCGATAATTGCCTTCGAACCCGTCAAGTC
ATACGCCGTAATAGCATAATAACCGGGGCCTAAGCGATCAGATTAAGGGAACGACTCTAC
CCTACGGGCTGCGGGGCTTGGCCGTACGCTAACCCTTCTGCGTTAGCGTATCCCCTTCTC
TAAT
>LINE_comp19892_g1_i1
TGAAATTTAGAGATAACTTGTGATTTTCATAGACAAATCATTACAAATATCCAAAGGAAA
TTTATATCTTTTGTTAAACTATTTTGATGGATACTAGATATTACGAAAATTATAAGAAAT
ATTTTTTTAATACTTGTTTTATTATATTCTGCACAGTAAAAAATGTTTCTATGAGAAATT
ACCCCTGGTGGGACTCGAACCCACAATCCCCGGTTTAGGAGACCGATGCCTTATCCATTA
GGCCACAGGGGCTGCTGCGAAGTAAGCTAGAA
>LINE_comp20024_g1_i1
TTTCAGGTAGGTGGACTTTCTTGAAATATATTTCGATTAATGTATAGTTTTGTCACTGAA
AATCTGGCTGCTACGTTCGAGGTACCAGGTTTGACAATTTTTAAATAGAGTGGTTTGGGG
ATTGAGGGATTGAGAAGTTTATGAATTTGGAGATTTAGGAAGTGGGTAATTAGGGAACTT
AGGGATTTCGAAATTTGGGAATTGAGAAATTGAGGAACGTATGAATCTCAAGATTTAGAT
ATTGGGAAATTGGGAAATTTAGGGATTTCGAAATTTGGGAATTGAGAAATTGAGGAACGT
ATGAATCTCAAGATTTAGATATTGGGAAATTGGGAAAT
>LINE_comp20128_g1_i1
TTCTGCTTCTTCTCTGCCTCTTGCTAATTTACCGTGAAACCACTTTTCTCCAAAATGTAA
TTCGTCGTTCGGCACACCCTTTGTTATAATAAAAATTAGAATTCGATCGGATAATTATTT
GTAATATATTTACAATAAGTACATACATCTGTTGGTTGTCGAATAACACCTTCATCATCA
TCGTCGTGCTCAGTTTCTTGAGTTCTAGAAAATGTGTCTGTGTAAAATAACTTTTGTTGA
GTCAGTACAAAAAAGTGTGGATTCCATTCTTTGTTAACAGGATCTTCAAGGTAGAGAATA
CCATTTTTCACAGTATTTCTAAGATCCATTTCATGCCTACTTTCATCATTTCGAATGAGA
AACGATGACTCATCAACACCATCAGGTAACTTTTTATGTTTTAATATAATTTTTCTTTTC
AACTGATGCGGTGATGGTAAACAAGTTTCATTTTTATCTACAGGTTGAACTAACAGCATA
TCACCGAATACTTCTTGCATAGTAATTGCCATTTTACGTTGCTGAGGCAGCGTGCAATTA
TCCTCAATAGATAAGATTACAGGATACCTGTAG
>LINE_comp21110_g1_i1
ATTCTTCTTCCGTGCAGTTGGAAATTATATGCCCCTCCCTGCCGCACCTAAAGCATTTAG
GTGGCTTTTCCTCTTTTTGGGGACATCTCACCTGCACATGCCCGAACTCCAGGCATTTGT
AGCACTGGAGCGGCCTGGCCTGCAGTGGCGTCACCACAGTGGCGGATCACCCCACCATGA
ACCGCTCCAGTGCTACTATCCTCTTAGCCGCGGCTATGGGGCACCTCGCCCAAATTGCGC
CCATCCCGTAGGGAGCGAATTTGATGTTCCCCACCTTTACTTCGGTCACATCGCAACCGT
CATTGGCAGCGATTGCTGCGGCGATTTCTTGCGACGTGACCGACTCGTCTACCCGCGTTA
TGCGGATCTCCGCCATTTTCTGGGGCACCGTTATTTTAATTGAGTCCCGTCCTTGAAAGA
CCGACCTCATCGAGGTCGCCAGTTCAGAGGCCTTCCTATTGCTATCCTCCCCGAGGA
>LINE_comp21177_g1_i1
GCACAATTGTTTTGTTCAAGATCACATTTCTGGGTCCCATAACTTGCGTGGCACAAGATG
TATGCAGATGCGGAACGAACTCACGCGAACGGCGGAAATAATCCCGGATAAGCGCGGTGA
ATGCGCACAATAGCAATAAATAAATATGTAAAGAATTAACGAACGCTGTAGCGTGAGAAC
CTGGTACGGGCTCTCGAAACGGCTGAATTATTGTGTAACGCTAATTTAAGCGTGCGTACG
GACGCCCGGGCTTACGATCCGATAAACCCAATGAATGCAAGCTGTAGACAACAGGGTTTC
GACCGCCGACTAATCGTCCACGATGAAACAAAACGACACTGTTCTCTTCTATGCTGCGTT
TCTATTCGAGCCGAACATGCTAAAGGTCTCTATACACGATGAGACTTGTCCACGGATAAA
CAATGGGTGATATATCCTACTACCTTCGATTGTAGGCCGTCAGTATAATTATCCGTATTT
TATTACCATCATCATCAGTATTATTATTATTGTTGTAAATATCATTATTGGTATCACTAG
TATTATTAGTATTAATAGTGTTACTAGTATTGCTAGTGTTACTAGTGTTATTAGTGTTAC
TAGTAGTACTATTATTATTACCATTATTATAAATATAACTGTTGTTAATATTGTGAATAT
GGAATGCAACACTACGAACACTTCTACT
>LINE_comp21203_g1_i1
CAAACGTATACAATAAATTATATCTTTTTCTCGAACAACGTACTAGGCCATAGAGCTAGG
TGAAACAGCGTTCCGAATATTATAGAGTTCGACATTCCGAGAAACTTATTTTAATTAGGT
GATCGCGTTAAAATATGCTTGAATTAGTTCGTTGAAATATGCTGGATCAATGCACCTCTT
GAGAATCACATGTTATTTGATATTTTGTATGTCTTCAATTAGTAGAATAAATTTCTCAAA
ATGTACATTTAAACACGAAATACTGTATCACCGAGCAGCTAGGCTGACTCAGACTCTAGC
ACGCATCTGTATTATGAACGAAGAATCACTAAACGAGTCAGTATTTGAAGCTTAATTAGA
CTGACTTTATTTTTTATCGAAAGTAG
>LINE_comp21251_g1_i1
ATCTTTGAGAAGTCTTTTGATCTAGGACGGGAAGTATCTTCCATCCACCGCCTTCATCGT
GTGCTCCCTTGTCATTATGTTGAATGCGTTCTTAACGCCCAGGGAGACTAATAAGCAGTG
CGCTCCTCTTCTCTTGGCTTCATTCCATAAAAAAATAATCTGGTCTAGTGCTTGTAAAGT
GGATCTGTCAGATCAGAAGCCATATTGCCTCTTTGAGAAGGGGTCCTGGACCAACGCTTT
ATTAACATGTTCGTCGCCCAGCGCGATTCGGCCGAGTTTCTTGCGAGGCCCAAATCTGAC
TGTCGGTGCGCCAGAAAATAAACAGAGAGATAAGCGGGAATAGCAACGACGCAACTCGAG
TAGGCCCGTGCCTTTTCATTATAAAAGATACAGTGTTTAGTTCGGCAATGGGGAAAGCGA
TAATCTTTTCGGCTAGAGGT
>LINE_comp21411_g1_i1
GAGCATGCATGCGTGAGAATGTTCAGAGGATTTCGAATCAATCGTGCTCCGAGATTTTAC
TCGACACCCCCATCCCCTTTGACCCAGAAATCGCTGATCATCGCTGTTTCCTGCATCACA
CTGGATTCGAACTCGGGTGGAGTCTTTTTTCCCTTTTTTTTCTTTTTTTTCTTCTTTATC
CCGAGCTGATTCGCGATTCGGTACTATGTAGCTTCGTTATTTTATATGTAATGTGTATAT
ATATATACCTGCGCATTATATACTCTGGATGTGTATATATACCTGCGCATACATACGCTG
GTATATGTATCTGTATATGTATATATATACACGGCTTCGCGTGGATCTATTTATGTTTGA
ACTGCGTACGGGTTTTAGTTCGCTGACTGCCGACTCGGTGGCTCGGGAGAGCGAGAGAAA
GA
>LINE_comp21699_g1_i1
TATTTTCTATTCATTCCGAAGCTCCGGTCCCACAGGACCACTGTGCCAGCGAAATTGCTA
AAACCAATTGACTACTGCGTTATGTCGAAACGACGTAAATCGGGAGGACGTAACTCGGGG
TCCTACTGCATAAGGGGTTAAAGTGGCTGGGGGTCGAGGAAACCGCCGATCGCGATCGGT
TCCGCGGCCAGAGTCCATCCAGCTGCGGTCCGACACCAGAAACCGGTATTTTCGCTGGAA
ACTAGCGGCGGATGAAATCGTCAGGCCGCGTGTCAATCCGGGACCGGATCGG
>LINE_comp22238_g1_i1
GGACGGAGGAAGAATGGACTGAAACTTTCTTATTAACACGATCAATCAAATCGCCACGAA
TTTAAAGCATTTTTCACGATTTTCCGGATTTCTGGGCACACCGCGCCGCCGCGTCGGGTT
AAAAATCCGCTCCGACGAACCGCCACGGATAAGTTTCGACGATCGATGCGGGATTAAGAA
GTGGCGGCCGCTTTTCTCCCGGCTAATTACCAAAGTGCGATCACTCATTGGGAATAATCA
GCCTCCGGGCCACCGCGTCGAATTCACTTTAGAAAAAGAAAAGAGAAAGAAAAGAAATAT
AA
>LINE_comp22469_g1_i1
ATCATTATCTTCGTAAATACACACTTTTTTGTGCACTTCGTGCTACCAAAAGCGTATAAA
GATCCATAATTAAAGAATAATGTTCCATACAAGATTCTCAGAGTATATTAATCTATTCAT
GACCAATCAGCAACAGTAAAAAGGAATATACAAAGCGCAACTTAAGTCAGAAGAACGAAT
AAATACTAGTAACAAAAATGAAACAAATAACAAGCGGAAGAGAACTGGCTGCGCAACAAC
AGTTAAAGTACGGCTGAAAACATTTCGAAACGGTTTCAA
>LINE_comp22522_g1_i1
AAAGAAATGAAAGTAGAGAAATATTTAAGATGGTAAAAATAAAAAAAGCATATGATCAGA
AATCAAATTCTGGTTTTCTGAATACAAGGCAAGACTCAAAGAAGCAAGGGGCCGATATAT
GAGTGACATTTCACAAAGCGAGAAAAATTGAAAAAGTTTCTGAAATACCTGACTCAGGAT
ATCCTTCTAGCTTCGCGATGAGAATCGGGATAATAAAAAAAAATCATCGAACATATTTCT
AAAGTTCATTACCTTTAAATTTTATTTTCTGTGGCCATT
>LINE_comp22724_g1_i1
ATACTAAAAATTATTGTTTCCGAACACCAGCATTCGTCAAATATTCCAGAAAGCATTTTA
CTTCAATATGCCCTCTTCAAGGTAAAATAGAAAATGTAAAATGTTTCAATTACCAGGGCA
ATCATCCTGCTAATTACAAAGCGTGCATAGTTCGGAAACAACTATAGCAAAAACTTTATC
CTACACTTAGCCGAAAAACATTTAGCAATGGCCGTAACATTCAAACACATAATCGCACAA
CAGAATATGACAATATTGCAAATCCGCACCCAACTAACATCGCTAAAAGTTATGCACAGG
CAACTTCAACACAAGTACACCAGT
>LINE_comp23235_g1_i1
GGAACGAAAAATTGGATCGGTGACGGTGATCAACGAAGATCGTTAACTCACTCGCGTCGT
CCGATGGCCGTTACACGCGTAAACTTTCTTGTGATCCGTAAATCACTCGATGATGTTAAT
CGTTACCTCGCGATGCTCGCGATTTTTCGATGGAAATGCAGATTTTGAGTTTTCTGCAAC
TTGTAATGACTGACAGATTAATTATGTTTCTTTACTAATCGTTACAAATTTCAATCGATT
CGGATTAATTATGTTTCTCCTATCGATCGTTGGAAACTCAGAAAAATTTATAATAGAAAT
AAATATTATTCTATTATTATTATTATTACTACTATTATTATTATCACTACAATCATTATC
ATCA
>LINE_comp23622_g1_i1
ATTTTCGTCCCGCAAGTTTTTTGCTCGGGGGATGGTGAGCGCATTGATTCATGACGCCAC
GATCCATTTATTCGTCGACCGGTACGGTCGAGCAGGTGCTGGGAAACCTGAAATGTAATT
TTAGCTTCGTACCACGTCGCGTTGCGGAGTGCTCCGTGTGTACCTTTTCCTCGGTCGTTC
GATAGAAAACTTCCGTCGCGAGTCATTCGTACGCTCGACCTATATCGGTAAAAAGCGACA
GGTAGCAGGCCACTGTCCGTAGGACATCTTTTTATTTCACCGGGACATGTAAATGTCGCC
TAAGAGACCCTAACGATCCTGTTTACGCTCGGCATTAGAACCCCGGAATATATATCGATG
TGTATAGAG
>LINE_comp23855_g1_i1
AGAGAGAGAGAGAGAGTGAGAGAGTGAGAGAGTGAGAGAGTGAGAGAGTAAGAGTGAGAG
TGAGAGAGACAGAAAGAGAGAGTCGCCGAGTCGTCGAGGCGAGCGTCGGTAGGAAAGCGG
AAATAAAGCGATGGACGAATAGAGACGCAAAATCGGAGGACGCACCATTCGCGAATCAAC
GTTGAATGGTAAATGAGTAACGTTCACGCTTCAAACCACTGTGTTTTAGATAATTCTCTG
TATCACACAGTCTGTAGTTTTTAAAGACTTATCGAATATGTTTATAGGTG
>LINE_comp23880_g1_i1
AGTCTTTGATACTGAGTCTTGAATACTGAGTCTTTGATACTAAATTCTTGATATTGAGTC
TTTAATACTGAGTCTTCGATACTAAGTATTGGATACTGAGTAATTTATATTGAGCCTTGG
ATACAGAGTCCTTGATACTGAGTCTTAGATACTAAGCCTTGGAGACAGAGTCTTGAATAC
TAAGTCTTCAACAGAAAGTTTTGAATATCCAGTCTTGGCTACTAAGTCTTCGACACTAAG
ATTCAATTCAAGTATAATCCTCAAGAAATAAATATCTATTAATACCAACTAATTCGAACT
AAACAATTTGGATTAACACCATCACAACAGAAATTCCTTGGCTTCGATACTTCGAATTCA
TCTAGCCAGCTGAACCTCGCAAACATCTGTTTACTGCATCTAATATTTACGTTCACTATG
TATCTGTCCTTCTTCCGGTGTTTCGTTCGTTTCGCCTGACTCATATTTT
>LINE_comp24199_g1_i1
GGAGAGCTGAAACGGATTCGCCGTCAAAATGGCGGCGCGCACGGCGTACGTCCCTAGGGG
CTCGCGAAACCCGTTCGACCGTCTGAAAAAATAAGACGCGATCGATATCGACCAGTGAAA
CGGCGATTTATCGGAACATCTGGCTGTGCACGAGGGTTTCGCGTCTCGTGCATCGACGGA
TGCGTGCGAAAGTGGACGCACGACGATTACGTGCGCGCAACAAGCGCGGCGTGAGCGGCC
GAGACAACGGCTGCCACCGCTCCGGAGCCTCGATAAGAAAACTGCAAGGAGTTATCGCCA
TACTGACCCGTGCCAAATGAAATAACTGACTCTCTCTCTCTCTCTCTCTCT
>LINE_comp24511_g1_i1
AAACGACTAATCAAACCTAATTGAATCCTGACAGGGTTGAACCCTAACATTATCTTCTTT
CCGCGAACGTCGTGTCAGCGACATCCGGAATAAGGAAACAACCAACTGAGCGACTCGTGA
GTGTAACAGACGTTTATTACCTCAAAACATCGTCGTGTCGTTTATTCTGGTCCGTTTATT
TACTTATTTAGATTCATTTTCCACGGTCAGCGAAGATGAAAATAGAAGAAAAGGGGGCGG
GCATCGTGGAGAACATAGATCGGAAGAGCG
>LINE_comp24763_g1_i1
GGATCGACGCCGCCACCCCGAGGGCCGGGAGTCGGCACTCCTTAAGAGAATCATAGTTAC
TCCCGTCACTTACCCGCTTCTTCTTTTTGTCGTTAAGCCACCAGTATTTCTTTAACACTT
TTCCGCACGGGTCTTAGTGATACCGTTATTCCGACGGAGGAATAGATTGAAAATCCGACA
TCGTTTGCTTTGGTGACTGTGAATAACTTTGAGCTGATCGCATGGTTTTATAGCACCGGC
GACGCATCTTT
>LINE_comp24828_g1_i1
GCAAAAGAATCGACAAATTTACAGTTTTTTGACTTTTACATTAACATGTATTAACACGTT
CACGACCACGGTCATAATGGAAATACCCTCGCTTTCATAGTCCTGTTGATACTAGCAGGC
TGAGTTGGTTAGCGATTCTTAGCTGGTATCATTCACTGAAGCGAATGATTTCTTTTTTAA
TGGTGTTTGTTTTAAGATCTCTGTGGACGATTGCATTGAGACGTACCACGGAGCATACAA
CAATAACTAAAT
>LINE_comp25499_g1_i1
TAAATGTGAATTTTCTGTAATTGGCCTCGAAACACAGGGGAAATCAATTCCGGGAAAGCC
AAATAAATTTCTTCCTTTGTTGACAGAATTTTGACTTAATATTAATGCAGGATTAAAGTA
CATGTACGATCTGATTCTGTTCATTTAAGTCTCGTTTACAAGCAATGAGAGTCTACTGTT
AAAACAATATAAGCTTATTATTTTGTTATACAACGTTTATTGAAACACGACGACTATTAA
ATTTTCGGTTGATTTAAAGTTAACTTTCACTCGTAAGATCTTAATGTAAATCATAAAA
>LINE_comp25507_g1_i1
GGACCAACTGTGTTCGCGCGCGGCGCCAGTACACCCGCGCCTGTCGACGACGACGGTTCG
ACGAAGAATGGGCTGCCCAGCGGTACAGGGCCTACCGTGAGAAAACGGTGGCCCTGCAGC
TGGCCAACAAGACGGCGAAGGCCCGAGCATGGAGAGATCTCTTAGGCTCTCTAAACAAAG
AACCGTGGCGGCGCCCTTACAAAATGGTAATGGGACGACTTCGTCCATGGGCACCCACGA
CCACAGAGAGCCTGGACCGCCAAGTACTCGGGGGATCGTGGACAAGTTATTTCCCCCACA
GAAAGA
>LINE_comp25640_g1_i1
GTCTTCGTCTATTGTAGGTAGAAATTTGAAGCTTTATACGTTGCCTCCGTAGATGTCACA
AAGGCATTTGACTCCGTGTCGCACGATACCATCAGAAACACCCTGCATAACGTAAAAGTC
TCGACTCAAATGCTCGAGTATATTATGAGTAGTTATAAAGAGTGAATCACGAGGCTCCAT
TGCAACGAATGGCTCTGTCGCTCAAAACGTTGAGGACGGGAAATAAGGCAAGGCAAATCA
CGCCAATGATCTTTAA
>LINE_comp26324_g1_i1
AGTGTTAAATATTTATATTGATCTATTGACCGAACGAATATCATCCCCTGATCAAGTATC
ATGCAATCTTCCACGTGATGCAACAGCACTTCTGCAATTTGTACTTATCCGTGCACACTG
AGAATCATAGTTTATTCGAATCTCGAATATAAAATACTACAATAAGGTGAATATAAACTA
TACATGCGCTATCATATTAAAGTGTGGAATATTTTATGATTTTAAAGCGAATTAAATGAT
TGTTAAATAAATAAATGTCTCGTTGAATCTATTCTGTAATAATAATG
>LINE_comp27172_g1_i1
TACAAAGAAGGAGCTGAACTGTGTTAGACTCTTATTCAAAAGAAATGATTATAGTGCGTC
AAATTACTTTTAGAAGTCCATTATAACATTGCCTAAACTTTGCGAATACTATTATTGTTT
AATAACACACTTTCTTCTTCACATTTACTTAATTAGCTAAGTACTTAAACTACGAAACAA
TTTTTACTCAATGACATTCATCTCATTATATTCTCCTCTAACCAATTCAGCTGACAGGTA
AATTATTAGCTGTGATTTCCGCTGCCTAACGAGCAGCACGTAACAAACAACGCTACAATA
AACAACAACCTTGTTCGAATCATACGGTAACTTCCTCTCCGCAGCGTGCCGCATAGCAGA
CGTTAAAAATACAGCTTCAACCTTAGCTGTAATTCAGTTGACCTAGATCGAGCGGGACTT
AGTCATTCATTCAATAAACCCAGTCATCATTCTAATATCTTGTCCAGTCCATTATTGGTG
GAGACGGAGGCAGTCATGTGACAGATTACAGTCACGTTACAGATTATGCCGGCACTAATT
GCGCCCAGCGGTACGCGTCCCATAACAAACG
>LINE_comp27234_g1_i1
GTACGGTACGTCTGTAACGCATCGATACTGACGACTTCGTTACATAAATCATTAAGTGAC
TGACGTATATTCTATTCTTCGCTAGGCTTTCAACAATAAACATATATTTAACGAGTAACT
TAACGGAACCGTACGAATCATCGAGCCCAAGTGAAACTTGCAGTTTGTATTTTATTTTCA
GGTGATCATCGAAAATATAACACCCATTGAACACTTGTAATTTACAATATTGAACGTGAC
AAGCTAATTACAGATCTTACTCGATTGTTTCCTAATGCACGCAAACACGCACGCATACAC
ACGCAACACACGCGTACACACACGTTAAACCGGTATCGAATGTAGTTTCTCTTTTGTTTT
TAAAACGCTACTCTCGGTATTTAAATTATACGAAGATAAAAAAGGAAAACGAAATATTAC
AATCACCGTGAGATATCCAATTGGCATTTTAAACGATATTAATACTGTCTTCAATTACAT
ATTACATATAGATGTGTATGTACAGATATA
>LINE_comp27730_g1_i1
GTCGCCAGTGGGAACGGCTCCTTAAGGGTAGCCTACTTAAAACCCGACGTGCTCCTATTT
TAAAGCGCGCCGATAGAAAATGCCCGAGAAGATCTCACTGAGAGATCGAAATTCGTAAAC
ATCGGAAAGAGTATACGAGGCTCGATTCACATCCCGCATAAAATGCACGAGTACCGTGAA
TACAAATCACCTTTCGTTCGAAAGAAAGTCTCTCTCTCTCTCTCTTTCTCT
>LINE_comp28064_g1_i1
AAAAAATATATATATATACACGGCTGTACGTGTACGTGTATTTACACACGTAGCTGCCGG
GCTTCTGTCGCTCGCGAGAACTGCCGAATTTCCGGTGGAATCTGTTAACCGCGGGAAACA
ACATTCCCGCGCGCTCGCTCGTAATTGTTTCATTCGATCGGCCCCGAAACCTGTTGTATA
CGCCGCGCGTATAGTATCGCTGAAAAGTACCGTGATATCCCGTGATTTTTCGCTAACGTT
TTTACACAATAAGATCTCCATCCGCGATTAACGCGTTGCGCACCGGAAACGAGATGTCTC
GTTTTTATTTAACCCTTAACGCTCCAGACGGTTTTGTAATTTAGCAACTGTAACTAATTT
TTATGG
>LINE_comp28275_g1_i1
GGTTCGGCGGGTGGCGGAGCCATTTCCATAGTCACTCCGCCATCCGCTATCCTCCGAATC
CAGAGGACTCTGTAACACGACCTCTGCGCCGCCGCCCCTGAGCTCACCGAGCGGGGTCGT
TCACTACATGACCCCTCATCACGTTCTGCGTCATCATTCGGCGCTGCGCTACATAGGTGC
GGCATACCTTCAGCGTGTGCTGCGCCGAGTCTTCCACATCACCGCATTGGTGGCAGAGTG
CTATCGCTTCCTTTCCGATGTGACACAGGTAGACACCGCGGCCACTGT
>LINE_comp28582_g1_i1
ACTTATTTAATATACACATGCATGCGCGCGAATTTGTCATACGTATCGTACATTTATAGT
TGTTATATATATGTATATATATGTGGTGAGTGGATACATGTGTGTAATGTGTGTGCTCGA
TGTACACATACGTATACATATTATATGGTATAAATTTTAATTGAACAGTCCACACAACGC
AACACTGCACAAAGCAACTCTTTACACTCCGATAAACAAACTACGGAAGCAGCTGTGTAC
AAATCGTTTTTATAGAATTTGGGCAACAGTTG
>LINE_comp28617_g1_i1
GTAAACACTCCACGATTGAACAAATACATCGCACAGTGAATGGAATTGAAAGTAATTTTG
AAGAACATAGAGATAACTTCATAGATATAAGCTCAGCCTTCGGCAAGGTCCAACATACAG
GATTACTCTATAAAATCAAAGAAAATCTCCCGCATAACTATTATACCTTATTCAAATCAT
ATTTAAGTGAAAGGTACTTTCACGTGAATCAAAATGTTAGTTTTTCCAAAATATACCCCA
TCCTAGCCGGTGTCCTACAAGGAAGTGTACTTGGGCCCATTCTATATCAGATTTTTACAG
CAGATCTCCCATGCAACGAAAATGTAACAACAGCTACATATCTCTAAAACCCCTACAGGA
ATCTCTGAACAAAAAAATTGAATGGGGCAAGAAATAGAAGATTAAAATCACTGTAAAAAC
GTCTAGTCATATTACTTTCACAACAAAACGAAATTGTTTCGAAATCTTTGTATGATAATT
AATTAAAGTCTTGAGAACAATAACAGCCGTCTCATGGTATGTCAAC
>LINE_comp28652_g1_i1
ACCTGTTATCTCACGCGGCCAGTTCTATTTAAAGCGCCGGTTCGCCAAAAATACACGTGA
ACGTGAAGAGGGTACAAAGAAGCAGCGGGACAAGGTTTCCCCGACACTTTCTCATCGCGC
CGGCTACCGAGAAATTGCACGGCTCTTTGCGATCCATTTGCAAAAACCATTAATTCCCAA
GGATCACACGTGCACGTAACAAGCGGCACGACCGGCCATTGCCGCGATACGAGGAGGGGG
ACGAGCAAACGAGAAGGGCAAAAAGGAAAAAGAGGAGAAAAAAGACGCGCGCGAAAAGAG
AGGAAAAAGGGGAAAACGTTAACGGCGAGGTTAACGTTAATTTTGAAGAGGGGGATTAGC
AATTTGCCAGGGTTTATCGTTATTTATTGCGATCCCTCGTTATGGAAGAATGAAGGGAAT
GGAATTTGCATTCGAAATTGACGGCAACGATGCGTTTGGGGTGGATGTTTGAAAATGGG
>LINE_comp28846_g1_i1
TGCCGAAGGCAAATGGTTAATCGTCATGTCCTAAAGATAACGAAAATTCTACGGAAGCCT
AACCGTTCGAACCATAGATGCACAGTCGAAGAAATTCGAAATGGCGGCGAGAAGTCACAC
AGGAAACCGCGTTAAGCGTCTCAGCGGCGGCGGATGAAGAATTTCGATGATGGTTCATCG
TTTGCATGCTGATTATATCCCAACCGCATTAGAAAAATTGGCCCGTAATAAGGCTGGCGA
AAGCGATAAACGCAAAGGACCGGAAACGTCGTCGTTTTGGATTCCGCGGGAGGGGATGCG
CTCGGTGAGCGGG
>LINE_comp28867_g1_i1
TGCACAGCGTCTCGCCTGACGTTACTTGTCGCGTCATAACAATTGTAAATTCTATTAGAA
TCAATTAGCAACGATTTCGTATCGTCTTCAGTTAGATTATTATTTAGCTACCTATGTAAC
TAAATATTTTGATTCGACATCAATCTTCTTCTTGTAATTGTCTTCGAACAATTTGGACGT
TCGGGTCATTTGTGACCACCGTAGCGGTCAACGTGTTAAATGTTCTGACAACTTCGGAAA
TTGTTGTTTCGAGGGCGGCACAGCGATTTATGCTCTTTAAAATTCAAAACGAAGTCATCT
GTAAACAATAGCAAGCGTAACGAATATATGTATTTGCAATTCCGCTCAGAGATGACTGGT
CTATTATACAGTACTATGCCTAGGAGTATGTATATACACATACATACATATACACATGTA
TAGGAAATACGTAAAAATGATAAGCGATTAAAGAAAATTATAAAAATAACAAAAACACAA
TTACATACACACACAAACACAACAAA
>LINE_comp29002_g1_i1
GACGTGAAATATAGCGTCGAATAATACACCGGGCGCACCGTACAGCCAGTCTTTCTGTTA
GTATCCGCAGTTAGCGGGAATCGTTACAATGCCGTACGCGCCGCGTACAATTCAGATAAT
ACAATGCCATCGGCGCAAATTTCACGGCTATTTCGCTGATAACGAGAATACGAGGAAAGT
TCCGCGGCGGGAGTTTATGGTCACGGCATGACCGCCAACCTGGGTACTCGCCATCTTGTC
TGTCCCCCATTTTATGGACACCGTGGGTTCCCCGGTTAAAAATTTTATTCCCGTCTAAAT
CTCATTTCGCTTGTATTAATACACAGGAGCGGTTCTCTTCTACTCGACATAATTTTATCT
GAACCTCTTTCCTTCGTATCTCAATTTTGAACCGTGACATATAGATACGA
>LINE_comp29141_g1_i1
TGTCGAACGAATAATTATATTTGACGATTGATCGATCGAAAAGTTTATGGAAAAGAGTTC
GATAAACTCGTAACGCGAGCTGTCCTCGCAACTTACTTCGCTAACACCTGTTCGATTCTG
CGTGCACGGAACGTGTTCTTCAACGGGGGAGGGTACAACTGTCGCCCAGGAATCCATTTC
CGATTTGTCCGGCAGGTAAACCGACGTTAAACCATCCTCCGGGAATACTATGATGTCGGC
TTCCTACGAAATCCACGAAACCCGAACAACGAATAGATCGGAAGAGCACACG
>LINE_comp29237_g1_i1
GTATAGGTTAGATCCTCGTTGGTCTTGTGTATTTCGAGATGACTCGTTTTATTGCGAATC
CGGTTTGTTCCCCGCGACCAAGGGAGCAAGAAGAATCGCGGGGAGACAGAAAGAGAAAAA
GAGAGCACGGTTAGAAGAGGGCTGCGACTGACGATGAAGGAAGTGGAGGAGGAGGAGTCG
TAGGAAAAGGAAAGGGAGTGATCTTTCTTTGGTCGTTCCACCGACTTGGGATCCTCCCTT
TCTCCTCTTATTCTGCTCTAGTTGTTGCTGCTGCTGAGGCTGCTGCTGAGGCTGTTGACG
CTGTTGGTGCTGTTAGTGCTGCTGCACTCTGTTGCTAAGTTGCTGCTACTGCTGATGCTG
CAGCTGCTGCTATTTGTGACGAGACGGCAAACGTGCCCGTGCTCGTTGTTCTTGTTGCTA
CCGTTAGT
>LINE_comp29554_g1_i1
ACGGCTGGAATAAGGTAGCACCGATTTCGAGCACGATAATTACGGCGCGGTCGCGCCGCT
GGCGGGCTGCCGCAACCCCTTCGATAAATAACGAATAATGCGCGCCGCAACAGTGTCGCG
TAACCACCCCTCCGTGCCCGATAAACGGCAACCGGCGGGGGATCGGGAACACGCTTGCGA
CGGTGCCCGATATCTGCGCCGGCGAATAATAAGTTCGCGAATTGATTCGAGCGCGACGGC
CGAACAAAAGCCTTCAAAGCGGAATTTTCGCTTGGTTCTTTCGCCCTCGTTCGTCGCGTT
TCCATCAGGGATGGGTTATTCAAAATGTCGGAGTATTGAAATCTCTGGGAACCGAAGAAT
AACTGGGCTTCAGAGAATTCGGAATTTGGAATTTTCGTCGGGAAACTGTTGGGACTTGAG
TAGGAAAACGCATAGAATTCGATTAGTAAAAGACCATTCGATTAAACATCTTTCGGTACC
GTTGCTCTTTGTATTCCGTTCCGATCAGAATTTACTTTGATCCCTTCTTTTGGCAATTGT
TAGGTGCTTCTCAGAGACATCACCGGA
>LINE_comp29720_g1_i1
GGCCACGGTACCAACCTTCCGTTCCGCGCGTTTCTCGCGAGGGCGAAGCTTTGCCGCCAA
AAACCACACCCAGGCACGATCGTACGAGCGCGTTCTGATAACGTGCAATATTTGCCAGCT
GAAAAATTTCGTTGCGGACCTGATGTACACCCCGCACGTGCATACCTACATAGAGGCATG
CATATTTTGCTTGCGTTTCTGAATTCGTAGAACATATGCGTATAGATACCTGCATGAATA
CATACGAAGGTACATACAAACACAGCAACATATACCTACACAGATACACATTCATGAACA
CATGTGCGCGTATCTGTATACAAACAGTTGTACGTTCTCATATTTACTCAGGTATATTTC
ATACAAACAAAGTCATACGTGTACCTGCCTACACGGATACACATATACGTACGTACATCT
ATATACACACATGCACACACATTCCCATACACACGC
>LINE_comp29934_g1_i1
AATCCTTTATCACGCAAACCACTACATCTCTGGCATTCCAATATATTTATCAAGGAAATG
ACTTCTGCATTGAAAGTCTGAACTGTCTAAACTCTAAGCCGTCAAATTCATAGATCCTGC
TAATGAACCCCGCAATAAAAGAAACGAAATTCCATTCCAGCTCAGTAGTCTAAACCAATA
ACAACAAATATACCACAATTTCAGGTGGACATAGAGAGTACAAGGGAGCTGGTCACGCTG
AAATGGGAGAACGGTTTCGTGGAGGTATCCGCGAAGGAAAACGTGAACATCTCGCAAGTA
TTCAAGGAGTTGCTGATCCAGGCGAAGCTAAAGTACAACCTGAGCCCGGCGTTACGGCGA
CGACGCCGTCAATCGTTGCCGCCGCCGCAGCATTTAAATTCCCGCAGCAGCAGTGCTCAC
GTGCCGTCGCCGGCGCAGCTGCAACATCTGCAGCAGATCCGCGAGCGGTCCGAGTCCAAG
AGGAATTCCTGCATTCTCTCGTAAGGGGATTTCGGCCGTGAGCGTTCCGTTTGCTCCCCG
CCGCGGGACGAACGCGAGACGTCGGAGTTAGGACTAGGAGTGG
>LINE_comp30144_g1_i1
GACGTGTGCTCTTCCGATCTGGGATAGTAGCTAAAGATATATATATGTATGTATACATAT
GTATGTAACAAGAACTGGTTGTCTTTTCGCACTCAAATTGAAATCGCTTGTGCCATTAAT
TCCAAAGCTCGAACCAGTAACAAATATTGGTTCGAACATACTCATTGACTTAGAAAACAG
TTACTATGACTTTCAGTTTTTCAATAAAAATTATAAATGTTTCTATTAAACCA
>LINE_comp30480_g1_i1
TATTTCGAATATAACAGTATAATGCAAAGTAGAATGGTACGAAGTCGATTGGACAATAAA
ATGAGGAATAAGACACTTCAATAAAGTTATCCCAGCAAGTGCAAATACATTTCTTTCCTC
GGTAAATTTCCATTTATTCTGTTTATTTCTTCAACATGCAAATATTGCAGATATTTTGAA
TATAACAGTATAATACAAAGTAGAATGGTACGAAGACGTTCGGACAATAAAATGAGGAAT
AAGATATTTCAGTAAAGTTCTCCCAACAAGTGCCAGTGCATTTCTTTCCCCGGTAAATTG
CCATTACTTCCGTTCATTTCTACAACCTACACATAGCGCAAATATTTCGAATCCGACCGT
ATACAAAGTAGAATGGTAAGAAAACGACTGGACAATAAAAGGTGGAATAAAACACTTCAA
TAAAGTGATCCCAACAAGTGCAAAGCGCGTATACATTTCTTTCCTCGGTAAATT
>LINE_comp30740_g1_i1
TGGATGAAACAATTTTAGTGCTTGTAAGGAAAGGGATTGTTAGTAAAAACGAAACTGTAC
GACTTCATTCAATAGGTTTTTTGGGAAACATGTCTATGGAATGTCCAGAAGTTCACCCTG
TTTTGCGTGATTTATCACTTTTGACTAATAAGATCGATCCAGAAGTGGATTTCTTTGAGA
ACATGCAACATCTACAGATGCACAGAAGAGCTCGTGCTCTTCTCAAATTTTGTAGCTTAG
CAAAGACACTGAAGAAAGCGCCAAATCCAAGAACATTAACACAATTTATTTTGCCACTAG
CTTCTTCATATTTATGCAATGATGCTTTTATACATAAGAACAGCATTATTGATGCTGCAA
TAGAAACAGTTGGAACAGTGTGCAAACTTTTGCCTTGGCA
>LINE_comp30827_g1_i1
TCAAACAGAAGTCTTCTAAGATGCATTCACGAACATAAAATGAGCATAGCAAGATGTTCA
CGATCTCAGGATATTATAGAATAGATGTTGAAGGAACAGTGGTTTGTAAAATGCAAAGCC
ATGGCACAAAAAGCAATAGATGCTGTTGCATATGGTCATTTACGTATAATTCCAGATATA
CATAAACAATCATGGTATGACTGGCTTGAAAATATTAGGTAAAATGAAATCTGTATGAAA
GGTATAAAAAAATTAATAACAATATTACAATTAATTTTCAATCTCAAAACTCTTTTTAGA
GATTGGTGTATTTCGAGACAGATATGGTGGGGTCATCAGATTCCAGCCTATTATGTTACA
AATGGAGATAAAACTGAATGGATTATTGCTCAAAACAAAAATAATGCACAGCTCATTGCT
CAAAATATTTATG
>LINE_comp30911_g1_i1
AATACTCAGTTGGCAACAATACCACACATTCGTATTTCTTATCTCCCTACTTATTACCTT
CAACCATACCAAAACCCTCGAAACCCTCAAGAAACACCTAGCCAATACACCAAAGAAAGG
AACACGCGGTAGGAAAAGAATCCCGGTCGCCCGAAAAAATTGCCGGACCTCCTAAACCCG
ATCGAAGCTGCAGAAAAACCAGCGTAAGCGCGTGCATCGGGATCAGCGCGCAGTGTCGAC
GTCGCCGCGCTCGTCTGCACGCGAGAATTTCAATAACCCGCGGGACACAAAGCGGTACGT
GTGTAGTCACATCTGGCCCGGTCTCATGCACGGCGGCGGCGGTGGCGGCGGCGGGAGCAG
CAGCAGCAGCAGCAGCACCGGCAGCACCAGCAACAGCCCCAACTATCCTGTTATCGTTAT
CGACGGTGTTGGCAGCAGAGGCAGGAGTACGAGTATCAATGGTAGTAGCGGCAGTAACGG
TAACAGCAGCAGATTCGTCCTTCTTCTCGTCTTCG
>LINE_comp30958_g1_i1
TACGAACGTCGAAGCAAAACCCCCCCGATTCCTAAACGGACATGCAACTTTCAGTTTTAT
TCAGGGAATCAAGGTTTCGTCGCACGCTTCGCCGGGCGAACGAACGTCGCACCGCACGAT
TCCGCTTATCGCGAGGAATCGGGTTTGTACGCTTTTTGGTTTCGCTGGCGCTGCTGGCTT
CTATCGGACGTCCCGCGAAGTTGATGTTCTTCGATGTCGCGGCGCGTGGAGATTAAGCGA
GAAATGTTCAAGTATACGGATATTCGGATGTTTCCATTTTCGAACTTACGGGTTTGAACA
TATTCAAATTTTCGATTGTACAAGCATTCAGATTTTGAGGTTTCTGAACTATCGAGTTTT
CAAGTTTACAGGAGTGCGAATTTTCGAATTTCCAGATTTACAAATATTTAAATTTATAAA
CTATTAAATCTTCAAATTTCCAAATTTCCAAATATTCAGGTTTATGAACTATCAAATCTT
CAAATTGACAAATTTACAAATATTCAAATTTATAGATTATCGAACCTTCAAATTTAGAAA
CTTCCAA
>LINE_comp31024_g1_i1
AGATTCATTTCCGCTTAAGTATGTTAGCGGCGTCTCCGCTCAGTCCAATTCCATTCTTGT
TTATGATCCTGTTCGCTCGAGCCTGGCCAAAGAAAACAGCTACGCGTTAAGGATGAGGAA
GGCCGGTTTCTGGGCCAAGTGGATGATTGCGGTGGTAATTCGCGGAGTTTCCAACGTGAG
GAAACGCTGAGCCAACGGGAAAAGATAGTCATGCGCGAAGTAATTTCGGATTAATATGCG
ACGCATGTCTGTCCTTATAAATACTGTTCAGATTAAGCTCACGGTTTGCCCGCGCTGGGG
CGCACGCTTTGCAGTCTCGAGGATACGTCACATACACCGCTCGGAATACGCTTGAGAATC
TCGTTCGTAATTGGAATATACTTCGACGAAATTGTAATTACTGAAATTTTTGGAAAATAC
CAATAATAAACTTACTTGCACTTTATATATACATATTCCTACCGTAACCGGTGAAGTTGG
TTGTAAAATAAAGTTAGACAAATTAAACGGTATA
>LINE_comp31050_g1_i1
ATTTTTTTTCTAATTGTTACGTCGTATATATACGTGTGTGTAGGTACACCTACGTACGTA
TGTATACATATATGTACTTACATGTACGACATACTGTATTTTATATGCAAGATTATGCAA
CATGCACATCGAATTGAATGTCTTCTGGCTTTTGATAAGTTCATTAAAGGTACAGTATTG
CTAACGACTCAACAACCTCTCGTCATTGTGTACTTCTCATCACTTAGAATTTTATTCCTT
TTGTGTAAATAAGA
>LINE_comp31099_g1_i1
AGCATACTATGCTCTATATACTCCTCGATTAGAAACGAATTCGTAAGAAACATTCTTTCG
GTATCGAATCGAAGCTGACGCCGAGCAATTCTCGCATCTACCCGTAGCTCGATTGTATGA
AAACTATACTTCGCTGGCCAAGGGTACGCACGCCCATGTTTAATTCAATAGAACACGATT
AGAAAGGCTGTCCAAACACATCGTAGCTCGTCGACCGGATGGAAGTGTTGCGTCACCGGT
CGAAGCCGGACGCTGTACACACCGTGAATACGATTGCGTGTCAGTTGACGACGGTGGCAT
>LINE_comp31640_g1_i1
ATGGTTTTAGACAGAATCACAGTACTATTCAACAAATAGCCAGAATCATCAATGACATCA
TCATCGAATTCAACAAAAACAAAGTTACCACTGTGCTCCTCTTTGACATTGAAAATGCAT
TCGACAAGGTTTGGATTGACGGACTGGCCTATAAGCTCATCAAACTCAGATATCCTACCA
CTTTAATTAAAATCATATAATCCTTCCTGCGTCACGGGGAATTTAGGGTAACAATAAAGA
ACTCGAAATTAAATAGTCATTCAATAATGGCAGAAGTACCACAGGGATCAATCCTGACTC
CACTGCTTTTCACTTTCTATATTAATTATACAGCAGAATGCCATGCAACGCAGTTGGCAT
TATTCGCAGATGACACAGCAATTTATGCTCAGTCAGTTGATGCGACGCTGGCTGCCAAAC
AAATTTAAATGCACGTAGCATTACAT
>LINE_comp32348_g1_i1
GGAATCTAATCGCACGAACCAACCTACGGAAAATTGAATGAAATCCCATTACCAGCTGTT
GGTTTCACCGTGGAAATTATAGGCTAGTAATTAATAACTGACAATTTCCGGAAATACACA
GATATCGAATTGAATTCAATTTGAAGATTCAATTCGAGAGGGAATCCGATATCCAATCGT
GCGATATTTCGTCATAGTACGAGGTAATTAAGTTAACCATGATTATGCACATGAATCGAT
CGTTTTTCTTCTGTTTCGATGACACTGCTCGACGAATATACTTCGAATTCCTCTTACGG
>LINE_comp32653_g1_i1
GTGTGCTCTTCCGATCTGTTGAGATATACGGCTTTGTCGAGGAGAAACGATTCGCTTACC
CAAACGTTGAATTTCTTAGGAGCACTCCTCATCTCTCCGTTGGGTAGGATCGACTTGGGT
ACGTGTTCGACTGTGAATCCAGTAACGTAAATCGAACTACGCAGTTTAATCAACAGGTAT
CCCGGGAATCCTTGAAACGCCCAGCAAACGCCTGGTTGTATCGGGTTTCCTTGTATAACC
GTCCGAGGATTGTTATTCTCTTGATAAACCATGAATGCCAGAAATTTCACAGCTCTCGTT
TTCCTATCGTA
>LINE_comp32705_g1_i1
TTTCTTGACCTAGTCGAGTGTAGTTTCAGCTTTGAGGATACCTCTGGAGGAAGAAGATTC
TTTAGCTGTGCAGTTCGATGGTTGAGCAAGTTTGGAACGCGTTGGAGATGATGGTTAGCT
GATGAAGCTTGTAACCTTTGGGGATCAGGGATTTGAAGGTTTAGTTTCCCTTGGACGTCT
CGTTCAAGGTTTTTTCGTATCGTGATGTGCGGTGGCGATCGAAGCAATGGCTCCTCGGGA
CCCTGGGGATGCACGCTTGG
>LINE_comp32863_g1_i1
GTGGAGTAAGGGAAACTTAATCGATTTTTATTTGAATTCTAGATTCTTGACATTTTTAAC
GTGAGAAGAAAGATTTTTAGCACTCATCGTGTTTGTGAAATAATATGAAAAAATCAGTAT
TTGTTATAATTTCATTACAACTATTATAATACGAATACTAAACGTAAATTGAAAGTAATG
GTAAGATCATGTTATCAAATTTATTCCATTAACCTGAAATTATATTTTCTGACGTACATT
TAGAAATAAAAAATATTTTACAGT
>LINE_comp32869_g1_i1
GAGTAGAGAGTGTTGAGTGGATAGAAGACTAAAGGTGGATAGATATGTCACTTTGCATTG
GAGAACAGAACTTGGCTAGAAAATCGATAAAGCCTATTAGAAAATACAAGAATATTATTC
TTAGTGGAGAATTCTAATAGAACAACAAAACAAAATTGTTTTACTATAATAAACGGTAAA
TACAGGGATGTACCAAGATATTACAAAACTGTATTGCAGAAGGTTCATTCGATAGAATAC
TAAATCTTTATTGTCTTGTCACCTAGAGTCGGACAACAGGTCTTGGTTAGGAAATCGAAG
GAAAATGTCTGTCAGAAATTGCCGAACTATTGTTCTTAGTGGAAAATTTTAATAGATCGA
CAAAAGAAAATTATTTTACTGTAAAAATCGGTAACTACAGAATCCAAAATGTCGATTGTC
CTGTCACCTAGAATCGGACAACAGGTCTTCACTAGGAAATCGAAGGAAAATGTCTCTTAG
AAATAACTGGACTATTGTTCTTAGTGTAAAATTCTAATAGATCGACAACAGGAAATTATT
TTACTATAAAAATCGGCAACTACAAGGATGTACCACCATATCACGAAACTTCATTGCAAA
GGATTCATTCGATGGAACCAAAATCTTGAAAGTTTCCCGCATTTCCTCGTACCACGCGCA
TCCTCTTCTCTTAACGTCATCTTTCAAAATTTCCTGCTCGACGTGTAAACACTCGCGAAG
CAATTACGAGCGTTACCGATTACCACTCGCCGCTCTATGGTTTACTACTCCGGACATGCC
CGCGGCCTTAGTCCTAC
>LINE_comp32871_g1_i1
GAAGTAAAAAAGTTTTAACTAAGTCACCGGGATTAGATGGGATTATAGGATTCACTCTAT
CGGGAAGTATATAAAGAAACTATAAAGCAGATAATAAGTAACGTAAGTAAACCGTAGCTC
ACGATACGAAGATCGTTTAAGTGAAATTGGAGCATTGAGCTCGGTCCACGATGCGTTCGA
TAAAAAAGAAAAAGACTGTTAGAAAAGTCCGTTCAGAGGTGCTTGGTCTTCTTAATTATA
GATTTCAGAGGCTCGCAGACCAAGAAGATTAAAATTCTAAGTAGAACATTAGTACATGAA
TTTCGGTGCGCATCCGATTTAGCTTGACTCTTTGCCAAGTTACTAAGTTCAGGAAGGGTG
AGTGACGCGTTAACAGGTACTCGATGAGCCTTTCGA
>LINE_comp32997_g1_i1
TCTCTCGCTCTCTCTCTCTCTCTAGCAACGCTCTCCTGAGATAATATCCTTTCTAATAGC
AATGATTAATCGTTACCTTTTGTTTCCCCCCTTTTTTTTCTCTTTCTTCGTATATATTGT
CAAAGATGTGAATATGTGTACTTATATATATGTATGTTTGTAAGTGTCTGTATGTATGTG
TAGGTATGTGCTTGTATACGTTAACAATAAGAAAAAATGTCCCATGCGCGCCACGATAAT
CTAAATAAATATAAAAACGAACTACATACACTCATGAGACGCACGGTGATCAAGCTCAAG
TACAG
>LINE_comp33004_g1_i1
GTGATATGACCTATCTCATATCCGTGAGGTGAAAAGGTGCGTAATGCACGAAATCAAGGT
GTGCAGCATTGGGATAGGAAAAAGGATGGGTGGGGAAAGGGATACTTAACGATGCGTAGA
ATAGTATAGATATACTTCTACTGTGATAATTTACCGTGAATGTGTCAATTTGATTATTTC
TTTGCATACATATCATTATTTGCACACTAATGATTTATCATATAAGAGATAGTCATTCTA
TAAAAATAATTGTTTTAATTAATTTAAAAAATTGGTTGTCTTTTATTATGTTGTTTACTA
GGAATCACATACTTTTTTAGTGCAGTTCCGTATACGTGTGCACTTATTCACGCAGAATAC
ACAATTACACGGTTAATAATTAAATATACATATTCAAGTTACTGACCATACGTATAGATA
TAGTAGATATATATACAGACATACACGACCACGTATGCTCGTACACATTTCAAACTAGAG
ACTTATACAAACATCCATTTAGGTTGCCTGAAATACATATTATATATACACATACACATA
CACATGTGCAATGGCTGTATACACATGAAATAAGTAATTGTCATTACAATATTATTAAGC
ATACCATACGTGCGTATAGTCATATACGTATTATTAGAGAAATTATATAACGAAGC
>LINE_comp33056_g1_i1
AAGACTCGGCTTGCGGTCTAGCACTGGTTGGCGCGTTAAAAAGTAATCGTGTTATGGTTT
CGACTGATTTGAGGATATGTGTAGCCTTGAAGTGACCTTGGTGATCGATGCTTGTAACAA
GAGGATATTGATTACTTGTCAGGGCGCGGATACTTCAAGGCCCCAGTAGCATGAAGAGTC
GATTGATATTACGAGTGATCTTGGAGGGATTGTTTTCAAACGTCTTTGACTATCGAGGCA
GATAACTTGTTCGAGCTGCTGACGATAAGCTTCTCCGAACTCTTTGTACGAGACGCTTCG
GACAGATACTAATTTATCGCTTTGATGTGCACACTAATTTCGGACTGTTATCTAGTCGTT
ATCGAGAAAGGATATTTGTACCGGAACTGTCA
>LINE_comp33538_g1_i1
GATGCGACACAGGTTTGTTGAAACCGAAGCAATCGTGTCCGGTGAATACCTGCGTCGTAC
GGTAGGTGAGCCTACCGAAGCCTCTCCTTTACCACCTATCGGCAGGGTGGCTGGAGAGCC
CCAAGGATTTATTCGCCGGTATGGGAACGTATCTTCCCACGCCATCTGTCTTGAACGAAT
CATCAGGCCCAAAGCCCGAAGCTCTCGACAACCTCTGTCCCCGGCGGGCGCTGTCGAACC
TGGCCGTCGATGCTGGTGCGCCTATAAATACACTAT
>LINE_comp33556_g1_i1
TGAATCATTGCATTTCAATCTAGGGGTAATTGTTTTTTCGATTAACTGATTTCCTACGTT
AATGGAACAAGGCAGCGCGCGTTTGCGCTCTGTTGACTTTTATATTACTCGATTCACGTT
TCCGCAGAAAGCAAAATTCGAGGCTAAACTTTATTGTGAAGACCGTCGGTACAACCCGCG
CAGCTCGCGCGACCGCTCTCGATGACTTATCAACCGGAACTATCTTCAACCTCCATTCGT
TCGCTCATTTATCCCTACGAAAATCATTCCCTCTTCATTATCACGGTTCGCTTTCACTCT
AAACTAACCACGCTCGACCCAATCAGCTAAACATCCTCTCGAAACTATCGCGCAGCGCGC
AACCCGAAGCAATCGTTCCGAACACACTTGTGACTGAAAACTAAACACATGGCGAAGATG
TGACACTGGCTTGTCGCCGCCACAGTAGCATCATTGCTTTTCTGGGGAATTCTTTTAACA
TTTTACGAGTTATTAAGTCAACACCGGGTGCTTTCTTTGCACACAAGAGTTTACTTATTT
GGA
>LINE_comp33626_g1_i1
TGGGCCCTACCTCGAGAGCCACTGGAATTTCGAGGCGCACTGTGACCGTCTGGTCCCCCT
AGTCGAGTGGGCGGCGGCCACTTTGGGCCGTCACATGCCGAATCTCGGGGGAACCGGGGA
CATGGTGCGCCGCCTTTACATGGGCGTGATGCAGTCGATGGCCCTATATGGGTTTCCCAT
TTGGGCCGCTACAGGGATGAGGAGCCGGCGCAACTTTTGGACCTTGCGCCGGCTACAGCC
GCCCTTGACAATTAGGGCCA
>LINE_comp33695_g1_i1
GGACCAATCTTCCGAGGTTCATCCGCACGCATACCTATCGCTTCAAACTTTTTGCATTCA
TGCATCTTTCGTACTTCATTCTCGCTCACCGTCTCGACGGCAATACCTCCACTACGCGTT
TTCCTCATCGCTTTCACTCGCACATTCAGACTCTTGCTCACTTCATTCATTACACGTTCT
TTTACTTGCTCACTTGTTAATTTCACACTCTCATCTTTTGGCTTTATCACCACGGCATAC
TTTTTCTCAGACACTCTCATCGGCACATTC
>LINE_comp33912_g1_i1
TAACGGCATCAATTAGCTGAGCATTTTTAAATGTAATATGGGTTTTAATAAAGTTACCAT
AGCCTTCACAAAAATTCCAGAAACAACGGCTCACGTATTCGTTGGACATTCACGAGGAAT
ACACGACCACAACGCTACATTGAATTGAATGGCTGCAGTTTCAAAACAATTTAATATCGT
GAAACGTTACAAGGATTGGATACAATGATTCCTAAACACTCCGTAATAATAATTACAAAG
AATTTTTGTATAAACTCAACGTGTCCTGGGAGCATAAGTACTGATAAACAAATTAACTTT
ACTGAAAGTATCTAAGGG
>LINE_comp34082_g1_i1
ATTTAACTGGTTCCGGGAGCTTACGAACTTTGCCCCGTGAATTTTGATTCATTCGCACGT
AACCGATCTGATTTTCCTTGGGGCGTTCAACTTGTTTCGTCTCGGAAATTTTACTTTGGG
AGGAAATAACGTCTCCTATTCTTTCGCCAAACTTTGATGTATTGTTAGTGCGCTTAACCG
AAGATATTTCTTGAAAACTATCATTCGAATTCATACATTCTCGGAATTAAATGTAGATAC
ATGTACCTTAGGAATTACATTTCATGGGACTGTGAGATCTCGATTTTAATCTTCTCTTTA
GTGAACTTTAGTTTCCCTCGGTTCCTCTAGTTACAGTTGGCTTCTTTCAACTGCATTTTC
CAATAACCTACACCATCCGGAAAGGATCTATCGCTTGAAATTTGAGTCGACTAAGATCGG
AAGAGCACACGT
>LINE_comp34088_g1_i1
GCAGGACTGGATCGCTTAATATATTACCCGGAGCTTTGAATTTGCTTCAGTTGTCCATTA
ATCGTGGCTACCCCAAAACCTCGGGTCAACCCCTTGGCTACAGCTGAATTTTGCGTTAGC
AGTTCTAAGAAAGTAATATTACGGAAACCCTAATTCGACTAAATTACATCAATAGAAAAG
TGACTGTTGAATTAGAATTCACTTCCGATCTGTGCCAGCTTCGCTGAAATCATTACCAAT
AATATTTTACGGGAGCCTATAGCCAACAGTAGCCAAGGTGTTAACGAGCTTCGATAACGT
ATGTTACGTCACCTAGGCAATTATCGTATAAAATCAACGAATTATCACACAGTAGCTAAA
CGATCAACA
>LINE_comp34429_g1_i1
AAGACAAAATCAATTTTTAGCTAGATTCTTATCATGGCTTAATTTCTATAAAAATTGACA
ATTGCATAAACAGCCTCATGAAAACATAAATAAAGTTAGAAGGGATAAGATTTGTGAAGA
TCAATTGTTTTTCTGCAATGCTTTCCTCAGAAGAAGAATTACATAGCCTGATCTTGAAGC
CTTCGTGTTACTCGTGTAAGACACCTCGACAAATGAGCTGCAGTCTCAGCTCGGGAATCG
GCCTGATCAGCCGATGGAGATTTCGAAAGGTCTTGCCTGCATCTAGAAGGACGTGCGGAG
TCTGCTCTCTGAAACCGACTTGGTACTTCACGCGATGGCGCGTCACATGGCCGCGCTAAT
TGCGGGATCTCAATTCCGCGTTTGTGTGAGATCGGAAGAGCGTCGT
>LINE_comp34613_g1_i1
AATAATGTAAATACAAAATTACAAAACGATGTAATTGGAATACAATATTTAATATATCAA
AAAAATATTTTGTAAGATCTCGATAAAAACAAAAGTACCTGGACCCGGTCCAGTATTATT
CAAGTTTCTCCGTGCGCGCTGTCCAAAATCCCTAGACACGGAACTCGCGGCTCGCTGTAT
TATATGTGCATACATATATACACACACACATACAAATGCACGCGTATTCGTACAGCTTGG
CCCGTGGAATACTTTATACTGCATGAATAATGTATACAGTGGCGCTGATAGCGCGCGGTC
CAACATTTAGGCAGCCTCGGCCAATATTGATACACGTTCCCGACGTGTTTCCCCTCGATC
TGCGCCCCAGCGCGCTTTTCTCTTTCGGCCACGTGTGTGTATGTATTTACACGCGCAGCT
TCCGTCCATCCTCCCGCCAT
>LINE_comp34707_g1_i1
ATCTTCCCTTCGTTCTTTTGAAATATTCACGAGCATTCTCTGAACGAGGGAGAACGGAGA
AGTTGGCGACTTGTTAAACGTATCTGAAGCCTTCCGAAAATAATGGAAAGCTTTCCGAGG
AGAATGAAGTTACTCGAGAAATGAGATAATGGAAAAGAATGGCCAGTACACTGCGCAACG
TTTTAGTGTTCCGCGCGGAGTTTCCGTTCGAATTTCCTTGAAAAAGCGAGGAAACTCTTT
CGCTGATTCAATATTTCCTGTAATAAAGTTCAGCTGAATTCGACGGAGGCTTTCAATTAA
CAACCGGTTATTTTTAATCGTATCGACTATTTACTCGAGATTGAAAACTGCGATCGATGT
GTCGACGCGTATATAG
>LINE_comp34785_g1_i1
ACTGTTCCCGGTCCCCCCCAGGGGTCCGGGTTCGCCTATGAAGGTTCCTCCACGTAAAAA
AAAAAAGATATTAGGGTGATGTGGGTATTGTTGGGAATGAATTTTGGGTTATGGAAATAA
TTGGTGGTCAGTTTTTAGAAAAGGCTGGAGATTCAGTGGTTTCTATGGTGAATCTGATGT
TGTCAATTCATCAGATTGTTGATATTAGGATGATGTGAGTATCATTGAGGGGTGAATGTT
GTTAGGGGG
>LINE_comp34824_g1_i1
TTTATTTATTTATTTATTTACCTACTTATTCATTTATTTGTTTGTTTTATTATTTACCTA
TTTGTCTGCTTGTTTATCTATGCAATCTAGCTATTTTAACTTAAATGCCTATTTAGGTAC
ATAATTAGCAATGCTTATATAACCAGCAATTTTAAAAGCTACTTATTAAGTAAGATAATT
TAATAATAATATGTCTACCTTCGCCAACAAGGCGTAATGCTGTACCCACCCCTGGCCGAA
CTTTGTAAGGCCAGGGGAACATGTCTTGAAATAAACGCCTTTTATATATATCTGGTGATA
TCTCG
>LINE_comp34828_g1_i1
GAGAGAGAGGGAGAGAGAGATAGAGGGAGAGAGGGAGAGACAGAGGGACGGGGAAAGAGA
CAGGGTGGAGGACAGAGAGCCACAGGGGGCGAGAGAGCCCGAGAGAGCCCGAGAGAGACC
GAGCAAAGGCTGGGCGGACAGTAGTGCACGAGAGCATTCCGTCGCCGCGATAATGCGACG
TGCAGCTTCTTTGCTCGTTCCTTTTGAATAAGTGCTTGCTGGGACGGTCCCTTATCTGCA
GGGATATGACGTAATGGCAAGAGAGGTACGCTAAATTCTTTGCTTTACTCGCGAACTAGA
ACAAAAAAAAAAATAACCCGCGACCCTGCGAGCCCTGACCCGTATAACTGTCTCTCCTCC
GTGATCTCTTAAGCATCATCTCTTCTCGCACGTCTCTGAGATCATCATCACCATCATCAT
CACCATCATCATTGCCTCCTTCTCTCTGTCTCTCTCTCTCTCT
>LINE_comp34919_g1_i1
ATATATTTATATATATATATATACATTACAATGTATAATAATAAATATATACGCGTATAG
GTATATTTATTATTATAAACAATAACCATATATGTTACGTAACACACGCGCGTATATTAC
ATTTACACGCGCGCGGTCCCTACGTACGTATGTATGTATGTCGTGTTACGAATGGTATGC
ATACATGTGTACGTGTCTCCGCTTACACTTAGAATATGTATATAGGTACGTAAATATTAT
GTAAATAATTTACAGTTTCCTCTTCCATTTCTTTTTTTCCCTTTTTTTCTTCGTGTAGAT
ATCGATGTATGTTCATCATGTACGAGATCGGAAGAGCGTCGTG
>LINE_comp35108_g1_i1
AGTATTAATTATATTAACGTTTAACGTTTGGTATTAACAATGTAGGGATATTCAAAATGT
AATTTGAATCTAACAAAGGGGTAGCAAATTGATATTGTTTAATATGTTTCTTTATGTAAT
AAAGATTTAACGAAATTGTAAGTGAACAATGAGTTTATCGTACTTGTAATTGCTGAATAA
TTAACCTGAACGAAGTCAGTAGCAAAAAGGACAATGCTTCGAAAGCTCCTTACATTTGGA
AATAGGAACATATAGGTACTTTATGATTATTGGAGATTAGACTCAGCGATGGGGTCCTGT
AGTTACGCAAATAAAATCTGTAATTGGATTTGCTGTGATATTCCAAGAAAATTCTACGAA
TCCTCAATCGAT
>LINE_comp35333_g1_i1
GGGCGACGGAAAGCGGTCTGCACGGGGGAGTTTTCTTATACAATATAATACAAACGGGTC
GCGGAGGTGTCACGGAGGTGTCACGGAGGTGTCGCGCGCGATCCAGTCGTGTGCCGCTCG
ATTTAGGTAACGTCAACGAAATTATCATTAAACCTAAGCGCGCGGGTTCCGGCCTAAAAT
CTACGGACGAACGAGTTTCTCTCTCTCTTTTATACACGATTTTCCTAACTAACTATTCAC
AATTCATAAATACTTTTGTATATCTGTATATGCATATATGCTGTACGTATATATATATGT
ATGTA
>LINE_comp35713_g1_i1
AATAAAGAATAATTACACTTAACTCAGGTACCGAAGATACGATACAAGAAATCTATAAAT
AAGTGTAAATGAACTTCTACAATTGATTAAGCTTAATTTATTTCTGCGCTTAGAAAGCAT
AACACATTGTCTGCGTAGGATCTTTTTGATGCTTCCAACGAAATGGTTTTGGATTTGACT
TCTGTCCTCGCCAGTCGGAATCACGCTTAATCCCATCACTGATATTCTCAAGCTCGTTCT
CGCTGTCATAGATTCATGCTAGGCTCAGACTTTTTGCGTTTACCGCTGGAGGGCTTTTAG
ATTCTATTCCCGCGG
>LINE_comp35731_g1_i1
GAGAGAGAGAGAGAGAAAGAGGAGCGATGAAAAGGAAACACATCTATGAATTTTTGTCGT
AGCATTTTGTATAATTGTGTTAGCGAGATATATTCCAGGATATGTATATGTCTCTACACA
TATATATATATATGCTTGGCGTATACATGTGGTATGCATTTATGTATGTATCGCGACACT
GTCGGAGAACGGCGAACCAAGAGAACAAAAAGCAGAAATGAAAAAATCAGACATCGGATG
CGTGTATGTAGGAATCTTTTACTTATACCGTGTATAGATTCGCTGTATATGTACTTGTAT
CGATATACATTTA
>LINE_comp35856_g1_i1
ATAACAATATCTGTAGAATTAATTCTATTTTCTTTGTAGAAAAAATAGAGATGCGACTGC
TACAAATATGTGACGATGGTGGCGAACGTGTAATACTGCATTGTTCATAAGTCCCTTCAT
CAAAAATCATGCCGTTACTTTTGAAAATGATCTAAGTCGTTTCAAACATTAAAAATCATA
TTTCCTTATAAGTTACACACAACATTACACAATCATAATAAATTCTTATTTTCCAAGACT
AAACATCTTATAAAATATTTCGTTACATAGTGTAAACACATTTTTTAATTTATTCGGAAA
CCTTTAAATATCGCGAAACTAAAAACATATGGACCGTTTATTTTGAA
>LINE_comp36025_g1_i1
GAACCCAGGAAGATCGGGGCGAAGATCATAGTCTTCGACGTCCCATGCGAAATGCCGAAC
GAGGAACTTATGAGTGAGTTGTATGCAAAGAATTTGAAAGAATGTGTGAGTGAATGTGAG
TTTAAAAAGAGTGTGCGTGTTGTTAGCAGGACTAACAAAAAGGATGCGTGTGTAGGCAAT
GTCATATTCAAAATGGGTGTGCGAATGTGGAACCGTA
>LINE_comp36251_g1_i1
TGCTGCTGCTGCTGCTGTTGCTGCGACTGCGGCTGCTGCTGCGGCTGATGGTGGTGGTGG
TGGTGCTGCGGTTGCTGCTGCTGTTGCTGCTGCGGCGGCGGCGGCTGTTGCTGCTGATGC
TGGTGTTGCTGTTGCTGTTGCATGGACGGCGGTCCGGCGTGGTGAGCGGGATGGGTCAGC
GGCGGCAACGGTCCGTGGGCGTCGTGACCGCCGTGAGCACCGTGACCGGCATGCGCCATC
GTATGGGTGGCCG
>LINE_comp36518_g1_i1
ACCTCCGCCGTTTCTATCTTGTTATCTTAGATTCCGAAACGCAACCACCACTTACTACCC
TCTCCTAACGTCGTGAGGTCCTCTTTATTGGCATGCAAACGTTATTAGAAAATCGTGTTC
GCTCTGCACGTACCTTGACACACACATACATACATACACAGACAAACACATATACAAACA
CTCATACGCACACGTGTACGCGCGTATCTGTGTGTCACAGCGTGCACCGCAATAACGTTT
CACGTCGTCGTCGAGTATTTATGGAATTTACCGTGGCGAGGCAATTATGGCTTGTTTCGT
GCCCGCAGACGCATCGCCGCGCGGCTTTACTTCCGAGCACTTCCGGCACG
>LINE_comp36592_g1_i1
TTCAGAAGGACAACATCAACCGACAATCAACTGGATCAGAGGCACGTAGAGACCATCCCC
AACCCCTTCCGAACGTCCAAGGCACTCCTATCCGCAGCAAGAACTCACCATCTGCTTCGC
TAACTCCCCCCAGCCTCTCCAAACATCGGCCCCCTTCCGCGTCCGAGGGACTCCAGGTTC
CGTCGTTGTCGCGACGCGCCGCTTGTCCACGGGAGACGCAGGTTGCGGGTACCGTGGAGC
GTATCCTGGGATCGCTCGCGCGACCACGCACGCTCTGCGCACGGGAAGGGAAAGACGAAG
ACGCTTACGGAGATGAATGCCGCTTGCGGGGAGAGATCGACAAGCTCGGATGAACAGGGT
CGGGATAGGAAGAGAAGAAGAAGACGAAGAAGAAAAGGCAGCAGCAGCAGCAGCAGCAGA
GGTAGCAGAAGCAGTAACAGCAGCACCGGCATAAACAGCGGCGAGAGGACCCAGGCCGGA
TGGCCATCGGCATCGGGGGCTGTGATTTATTCAGGGTTATTGTCCTGCGCGGGGTTTTTG
TCCTGCGAAGGGCCCGGCGGAACAACGCGCGCGTATATGCACCGGGAAGGACCGAGGCAG
GCGGGCGGCGTTGTGTCCGA
>LINE_comp36787_g1_i1
GTGTGCTCTTCCGATCTCCTACATTATCTGCCCCGCCAACAATGGTTTCTCACTATTCCG
GAAAATCTACTTATTCTCCTGGCTCGAATACCGCTATATCACCAGCAACGGGCACAGTAG
TCGCTTATTGTCCGGAAAATTCTGTCGTCACCAGTTGCTCGAATGCAGTTCGAGTTACAC
CATCTCCACCTATTGTACCGCAGAATCAACAGTTGCAGCAGCAGCAGCAGCAACAGC
>LINE_comp37049_g1_i1
AAGAGAAAATGAAATGCGTGGAAGAATTTTGGAAGAGTGGATTTTAGTGAATATGATGAT
TGTTCTGAATGAGCCTAGTGAGTATTATACTTTCTCGAGCGTGAATGGTGTGAGCGACAT
TGATCTGACATTGATAAATGGAATGCTGGCCAGGTGCCGATTTGAATGGGAAGTGAAGTA
TGACTGGGGTAGAAGTGACCACAATGTGGTCCTTAT
>LINE_comp37165_g1_i1
TTATCATTATCTGAATCACTTAAATTATCTGGACACTTCACAATTTGAATATTATCATCT
AGACTTGAGCCATCGCACATTTCTATACCTGAAGCATTTTGATCTGCACTATCATTAAGT
AGCGTTTCACCTAATGATTCTTCGCTTGTAATTACTAACTTTTGCATACTGTTAGGACTA
TCTGCCTCATTATCATTGTCTTTTAGTGATTTATTAGTGGACAAACTGCTCATAGTAATT
TGCTTTGGACTTCTTAAGATTGCATTAGGAACTGTATCATCTTTAGTTTGAG
>LINE_comp37213_g1_i1
GGCCCGAGTAATTTTCCAAGAGAGTCAGAAGCATCGCGTGGCGACCTCCGAACGGAGAAT
CTTCCGGCGCCGACTCCAAAGCGATCAAGCTTCTCTTACAGGCGTCTATCACGGAATACG
TTTCGTCCTGAGTACTGTGGGTAGAAAGAGGGCGAGAGAAACGTTAGCGAGCTCCAACAA
AGAATCCGCGCGGTTAATCCCTTGTCCTACGAGTGAGACTCG
>LINE_comp37477_g1_i1
AATTGAATGAATGTTTCTTGCCAGACCAAGTTGCAAGACATATAATAAATATCTGTAATA
TTCGAGAAAGCTGAAGCAACAGTTTCTAATGAAAAACATTCCGATAACGATGAAAAATGT
GATCTGGTAACAATGCAAAAATTTTAAAAAATCGATGTCAAGGATTCTCGCGAAATATTT
TATATTTTTCTTCGATTCAAGAAAAAGGGAACTATAAATATTTGCGATTGGCGAGAACCT
ATTCGAATTTCTACATTTTAATTCGCGTTCTTTGTAATTCGATAATAATTTTTGTAATAA
TTTTTGTAA
>LINE_comp37587_g1_i1
AGAATAAATCTGCCTAAAATATGCCTTCTAAATTAGAAGAAAATTCTTCAAAATTTATAA
CATATACGTCTATAAAATGTTAGATTTATAATATATCTCATATTTAATACTATTCTTAAT
TACACAAGAACAAAAAAATGTGACTTTATAATTATCGCTACAGCGTAGGCAGTACTTAGA
ATTATGTAGACGAGTACTTCGCAACTCCAGCTACGACGAACACAAATATCGCTCCGAGGA
CCTACTAAAATGTTTTACAAGGTTTGTATTTAATAAAAATGTATTTGATTTTCTAATACC
AATGGATACCATTTTACAGGATACTGTGCGAGGAAACTGAAGAGAGCCAAGAAGACCAAC
AATTGGTACGCGAGATCAGCAATGAATTTCCACATTTGTTCAAAATGTGACATTCACTCG
AGTCCTCTGACAAGAAAGACTTGGAAGAGGATGATTTACAAACTTTAGTATAAATGACAC
TCTGGTATGTATGTAATACATAGGAGTGTAAAACTGAGGATGAATCAACAAGTTACCAAT
CAGAAATGTTCTTTATTTTTCTAACTTCTATTTTGCATATATTTTGCTCAGCCAGTTGTA
ATAATTATCGAGTACGCACACGATTCGCAGAACCTTCGAA
>LINE_comp38404_g1_i1
GTCGCCTTCCAGAGTATATATAAATATAATATATAAATAAATGAATACACATGTACCTGT
GTGTACACGCACGTATACGTTATACGTGTGTGTACATACACGTACAATGTGTATCGAACG
AACGAACGGACGAATTATTGTTATATACGGGGCTCGAGGGGACGACCGGTGGAGCGAACC
GAGATTCTCGAATTTCGAACGCTGGAATAATTCCATTTAAACGTTCGATCGAAGGTTTCT
CGTTGAAACGTCGATCGACGCTCTCCCGAGGACTCAAACGTCCGACG
>LINE_comp38709_g1_i1
AACGAACGAAATCTTCAAAGAACACTACTTCAAGCTCTACGATACCCAATCCCCTAAACT
AAAGCCCACAAAAACCTCTGAAACCGCAGATCGCTAGAGGATCGGCCGCGTACCCAGTTT
ACAGACATAAGGATTGACACGATCAAAGACAGCAAAATAACCACGCAGGGTAGATAGTGT
CTATCCTCGACAAAGATTAAAAACCGGACCGATCACAGAATAGCAACCGATCTGCTGTCG
GTCCGCGCGGTCTTACCCTACTAATCAAGAAGAGAAAGGTAGTAGAGACTGAAAGTCCTT
GAAAAAATCGTGGTCCGATCCTTAGCCAAGTCTTTATCCGGACTCGCGCTACCCTGGCGT
CCGTACGCACGTTTCTCCGATGTAAATTTCGTGTTCCGTGTGTGTATGAGCGATCGGTAC
TGGTAATTCTTGTAACTGTAGTAGCAATAGTAGCTGTTGCTGTTGTTGTTGTTCTTGTTC
ATGTCGATGAGTAATGCGTGTGGCAGAATGTGTAATGA
>LINE_comp38917_g1_i1
CGTAGGAGAGAGGGAATAAGTGAGGGGATAAGAGTGAGAATCTGTTGGTAACGGACCTGG
AGAAAAGAATAGAAAAAAGGGAAAAGGTGGCGTAGAGATTGGGGGAAAGAAGCTGTTTAG
CCTAGCTTATGCGGACGATATAATGCTGTTGATGCAAGAAGAGGGGGTGTTCAGGCTAAT
GATGGGGGAGCTCAGGCGCATCTGCGGGAAAAGGGGTGAACAAGTCAAAGGTGATGCGTT
TTGTGAAGAGGGGAGGGTGGAGGAAAGAAGGGAGATGGAAATGGGGAGACATAGCGATGG
AGGAGGTAAAGGAGTTCGTATACTTAGGATATAAACTACAAAGAAACGGCAAGCAAG
>LINE_comp38926_g1_i1
GTGTGTGTGTGTATATATATATATGTAAATTATAGTAACGTAACTTCCAAGCTTGAATCG
ATCTCTACGCGTCCACGCGTTACAACGAATCGTATAGTTACACGCGACGATACAACCATT
TATATTACAAAAAGAAACGATCGTTTGGTCTCTTCCAGAACGAATCGTGAACGTTCACCT
GAAAGTGTGAAACGTTGCGATTCGACTGACCAAAGTGTAC
>LINE_comp39003_g1_i1
GTTGACTACAGTGTAAGCCGCGTTCTTACGTTGATCGTGTCGAGAATCAAAAGGAAGGAA
GCAGGAAGGGAGGAAAAGAATAAAAAAAAGGGGAGAGACGCTTGCCGCGAAGTAATCGTT
CTGTAATCGGGAAGTTTTAAAGATTGACAGCGAGAGAGGGAGAGAGTGAAAGGGAGGGAG
TGAGAGAGGAAGAATGAGAGAGCTTAAACAAACGATACGAATATAGACTTTATAATTATA
TTATCCAGCACAGTCGTGAATCGTTCAAACGAGAGCAACATATTTATATATAATAATAGT
TACTATATACATTTATATA
>LINE_comp39730_g1_i1
GTGTCGCCGAGGGTAAATGTTTGGGTCCGGGACACCCTCTGTTTTGGCCGGGGATGGAAC
ACCCCTGAAGCGAGTAAACATTTGTTTTTTTTTAGTGAGTAAAAATCTCACGCTACCCCT
TGTCCCTCCCCCCCTCCAATGAGCGAGGGGTGCCTGACACAGGTTATCCAGGGTGAAGAA
AAAGGTCTCTTTCGACACTTTCAGTAGAAATAGTGTTAACCCTCAACACTCGAGAGGTGA
CTCTTAGTCATTACCTGATTCGATGCAATAAAACTATAAAGTTGAATAA
>LINE_comp40514_g1_i1
GATATCTTCTCTTTATTAATTCGGCGTATATATGCGTTTTATGGCTGCGCTTTCAAAGGC
CTGACGAATTAAATTGGGCTGCAATATTATCGATGACATTCAGGGATGCGTCATGGTTCG
CAGACGAAGGATGTGGTTCTTTTCAGTTTATCGCTCGAAGAAAGCCTACGGCTATTCTAA
ACCTGTTCTAAAAGTTTTTCCATTTTCGTTTTTTTCTCGTATAAAGATCAACTGCAGTTG
ATGATAAGATATCGTTTTTATCTCACTGTCACACTTCAAACGGTTCAAAGATGTATATAG
ATTTTAGTATATATATAAGCTACCTCTACGAACTGTCACATTTAGTTGTACGAGAGGACC
CGAGACATACGATTCTATTTTGCGAAGCCAAATTGTGCTAACTAAAGTGTGCGCGCACTT
CATTATAATCAACGGTAAGTACCATAGAAATGAATAA
>LINE_comp40583_g1_i1
GAACAAAGGTCGAGCTCTGGTGAGTCTTTGCACGCGATCATTTTTCGTTAACAATAAAAA
AGAAAAAGAGAGGAAAAGAGATAGAGACAGAGACACATTGGCGGTGCGTGGACCGTGTAT
CACTTTTCTTTTTTCTTTCTTAGGCATTGTGAGAATTTTAGGTACTAACGTTGTTGTTAG
GTAATCGTGTGCCGTGTGCCGTGTGCCGAGAAGTATCTTTTCTATTCGTGGAGTTACCTA
CATACACGTTTGTCGTTGGTTTGCTGTTGTTTTGCCGACACATTCAGAATTTCTTTTTCT
TGGATTTGTTGCG
>LINE_comp40625_g1_i1
TTTATCATTTTATCGTTATTAGAATTGTAATATATTAAATAAATTTGTTTAAATAGAAAA
CAACTTAAAATTAAATGGACTATTAACCTAGATTTAAAAATAGCGGTCTTAAGCGAATTG
TATCTTATAAACCAAAGATGGCATGTCAAAAAACTAATTCATAGCAAAACATTGCAACAA
AGGTTCTGTCTTATTCAGGTTTTGTCTTTTCATACATTACAAGTATAATAGATAGTAGAA
CTCTAACATCAAAAGCTATTTTTCCCATATTAGGAGCAATGAGTGGGATGTACTTCATAT
TAAAGAAA
>LINE_comp40654_g1_i1
ACCTCGTTCGAAAATCGTAGAATTTTCAAGTTTATAACGCAAGTTCCAATCCTTTCCCTT
ATATAATATCAGCACATCAAACTCGTGTCGAAGACTTCAAACAGAAATTTTAAACCTGTC
AATTTTTGAACCTCCCAATTTCTAAACTCTTGAAATTTTAATATTATCAATTGTCGAACC
TTCGAATTTTCAAGCTTTCCAATTTTTGAGCTCTTCAAATTTTGAGCTTGTCAATTTTTG
AACCTTTCAATCTTTGAATTCTTCAAATTTTA
>LINE_comp40657_g1_i1
AGTGATTTTTCGATCGGCCTCGCGCGGTAGTAAAGTTCCCAATATCCTCGAATATCTCTC
TTTTAACATTGTAAGCGGATGCCTAGAAAACGGAGTATCATCGAAATGTATTTCTACCAA
TTCCTTGGCCTGTAATATAGTATCAGAACCGTGGTGAATATTTTCAACCGAATACGCCGA
GTCTAAATATTATTTACTTAAATTTGATTCCACATTTCAGTAGCTTCATCTATCCCAGTC
GCGAATGAGTCATAAGACGAGGGGTTCGATACGGTTAGTCTTGAGAATAT
>LINE_comp40816_g1_i1
AACAGCAGCAACAGGCCGAGCAATTGCAACAACAGGCAGACCAGTTGCAACAGCAGTCAT
CGGTATCTGAGCTACAACAAATACAGATACAAGTAGGGCAAGGTTCTCAGGCTCAGATCC
ATCAAATAGCTGTTAGCGAACAGTCTACCGTCGTTCTTCCGACTGCGGCTGAAACTGGTG
CAATGGTTATACTTCATCACCAACAACAGCAGCAACAACAACAA
>LINE_comp40873_g1_i1
TTTACGTGGCGTTATTTATATTCGATCTGAGTTTAGTGACACCTAATAAAATTAAAGCAG
GTGTACCCAAGCAAGCGTTCTAGGGTTTATACTGTATATACTTTACACAGCCGATATTCC
AACTACTGACAAATGCAAAATATTAAAGTTTGCTGATGATACTGCTGTACTAGTTACACA
TTCAGATCCAAAAGTAGCGACTATATTACTGCAAAAATACGTCATAAAAATAGGAAAATG
GCTCAAAAAGCAAAAAATAAAAGTAAATCCCAACAAATGTAACCACATCACATTCACACT
CTACAAGAAAAACTCACCGG
>LINE_comp41099_g1_i1
AAGCCCTTAGGAACGAAAGTAGCACGGAATTACGGGGTTCCAGTGGAGCGTGTCCTCTCG
AAAATGCCCCGTTTTCACGGCGTTTCATTAGGGGCATCGAGGGACACACTGGTACCGATC
GCCGCGTTCAGGATTTACAATTAGCGATCACGACATCGGGATTATCACGAAAAACGAGCG
CTCCGCGCGCGATAACGGATTTCCTTAGTCCTCCGCTTAGATAATCGAGGAGCGGGCAGA
TATTTGGACG
>LINE_comp41292_g1_i1
CAGAGTCCCAGGGAGCCCCACGAGAAGGTGGGATGAGTGGACCATTTTATGCCAGAGTAG
AGTCTCGAACTTCGCCAAAGGAACCCATCACCGCAGGTAAGTACCCGAAGGAAAGTAATT
TTGGTTCGCGAGATCATCAGTTCCATCAGAGTGTTTGACTCCACCGAGTGGCAATATACC
GGTCCGTGTGCCGGGGTGCGTCTCTTGGAGGAAACAAACCGACTTCGCGTTCCAGCATAC
CATCCCATGAGGAGAAAACTCCACTCCAGCCATGCTTCCCAACCGCCGCCATAACTGTTG
GGTGTTCAAACGCATCCCTTGCAGCTACGCAAGAGGACCATTGATGTTAGTCTGGCGCGA
ATCATTCCCGGAATCGAAGTTCGAAACGTGGGAATGCCAAGTCCTCCTTTGCAGTTTGCG
TGGAAATACCCTATCGGTGTATCTTCGGGTAGACACAACCATCTTCGAACGGCTATCCGC
ACTTG
>LINE_comp41531_g1_i1
TCCCTGGGGCACCCCGCGGTCAATAGATCTCCCATGAGACCTGACGTCCCTATCAGTGAA
TAAAATCCACCTAAACATAACCCGAGCTGAGCCATGCCCAACCCAACCAAGGCAGAGATG
ATCTATCTAGACATGAAAGATAAGGAAGTTTACTCCTTATCCTAGCGGTCCGACCAATTT
GACCGTAAGGGACTGGTACCTCGGCGGCCGGTGCCCAGGGTCCGTGAGAATGCTCCGGCC
GTTTAGTGTGGACTCGAGGGGCCAGTGGTTGAAAGCCCGCATACTGGGCTGGGGACCTCC
TTTTCCCGGGTCCCGGCGAGTGAGCAGCGTCCCATCTACTCCAGTACAATTCCGCGCTTA
TGGGGACTTTTTGTATTGTGCCTTCACGGCGGGTACACTGGACGTAAAACTACGGGCCTT
CTGACCAGCAGAAGTCTGTCGTCTGCATAGCAGACGACTTCTGTGTTTGGCGGGAAGGGA
TGCCACAACGCTACGTCGTACACGACATTCCATAGTGTGAGTCCCAGGACGGATCTCTAG
GGCACCCCGCTATCAATGG
>LINE_comp41606_g1_i1
ATATACTCGGGAAAGATGTAATAAAAGCGATCGATGTTCAATCGAAAAGATTTTCTTTGA
CATGATGATTTCATTCGAAGAAATATTAGGCTACATTTCGTATTGACACAGTTCAGTTTT
AATGTAAATATTTAAAAATTCATATTTGTATTGTACAACGAACAATGTATACATAATTTG
AAATGTATATGATGCTCGATAAATTTATTTGAATAATGTAAAGATGTTCAATAAATTTAT
TTGAATAAATATACATATACGTATAAAAGGGTAAGGATTATAAAATATTCAGTAATGTTA
TGTTAGTTTACTTTATAAATCATTTTTATAAAAAATATATAAAACAATAATTTACAGAAT
GATGGGTTTTTATTATTGTTAATATGGGTAGCTCGTATTATTTCATAAT
>LINE_comp41625_g1_i1
AAACAGAGTGCCGGACAACCGAGCGAACCACCGGCACGATCGCCGAGCGATACGGATCCG
TGGCGCGACCGATTTTCCCGGATATTCGGGGAAAAGCGGCGTGGCCGACAGGTGATTCAA
GGTCAACGAGGCGATAACTGTCGTCAGCTGGCCGGCGTTATCTTTCTTAGATTGACATTA
ACGCCGACAGCGGATGGTAGCTGGTTTATTATGCCGGCGTTATGCGCGTACACGCCGGCC
AGAGGTGGAGTTTCAAATCAATAACCGGTGTTAGAAGGCATTTGGCCACGCCGTGATATC
GATTATGTAGCGCGGCGGTGTGTATACGATGTGTGTGTGTGTGTGTGTACACGAGTAGAC
AGGTTTGTGTTATGTACACCTCCGCCCAGGCGTATGTGCACACTCGTACTATCGAGTCGG
TGTGTGCACACGGCGGTAATATATACTTCACGTGTGTTCGCGCGTAGACACGGCGGCGCG
GCTTGGTGGAGAGAGTGCAAGCAATTTTACGGACAACACACCCTCTCCGCGGTCGCCGGA
ACCCCGA
>LINE_comp41673_g1_i1
GACGAAAAAGCTACGTGTTGTATGGAAAATTTGCTCGCACGGTTGCAAGCCGTTTCTCAA
CTAGCCGAATGTAAATCTCGTTGCGTCTGCGTCGAACGGACGGGCGAAACGGCGCGCGAA
TTAATTCGCGTCGCGTTCCCAGAGATCGTTTATCGGCGCTGGTCAAGATTAGCGCTGATG
TAATACTTTTTTTAGAACGCGCCGCCGGCCGAACGACACCTGTACATTTCAACGGAACAT
TGTAAAGCATCGTTCGCCGCGAGGCCGCGCGCGGAATTAACGAAATTCGAAG
>LINE_comp41878_g1_i1
GAACAAGCACCTGTCGAGGAAGCCACAACTGCAGGCCAATTGCCAAAGGAAGCGTCTACC
GAGGCTGCGATCCAAGAACAGGAGAGGACAGAGGTTCCATCAGCCACAGAAGCTGGTCTA
GGTGAGAAGATTGGAATAACCGAGGGAGCTCCTCAAGTTACTGAAGTGAGCCCAGGTTTG
GAAGCTTCTACGCAAGAAGTTCCGCAGGAACAAACTCAAGAGCCCGAGAAACCGGATACA
CCGGAAGAACATACTACTGAAGCTTCATCGTCCGAAGTACCACCGTCAAAGGAAACTTCG
ATCGAGGAAGAAATGCCAACAAAGACACTGACCATTGATGAATCTGGAGAAACATCGTCT
GAGGAAATTGGTGACTCTAGCGAAGAAGTAGAGCATCCTAAAGGCG
>LINE_comp41932_g1_i1
GATTGGGTCAAAGCCGAGTGTTGGTATGAGTGCGAGAAAAGAGAGAGTGAGTGAGCCGAT
GCGGATGAGTGAAAGGAAATTTGCTGTCGTCATCAAACCGAAGGACGACAACTCTAAGAT
GACGAGCGAGCAAGTAAAAGAGAAAGTCATGAATGAAGTCAGTAAGTGTTTGAATGTCCG
TGTGAAGGCCGTACGTAAGACGAGAAGTGGAGGTATCGCCGTCGAGACGGTCAGCGAGAA
T
>LINE_comp42639_g1_i1
GAGAGAGAGAGAGAGAGAGACAGACAGACGGAAAGAGAAAGAGAGAAGAAAAACTGTTGG
TTTCGCATCGATGCAGATTTCCAACGTGATTCTCAGCGAAAAAGATCGCCACGAATTTAT
GCGCGAACGAATCGAACGAGTCTCGTATGCATACGAGCGCGCGAACATGGAATGTACGTA
TATTGCGATGTAGCTCGGGAACAACAAATTCGCGGCCGCGTATCGGATCGAACGGATCGA
ACGGAGAAAAGAAGAACAACTGCGTTACCATGAACCGTTACGTGTTTATAAGAAGACCAA
AACTATGCTCTTGCCGTGATTCCTAGTACTAGTAGTAATGGTAATAGTAGTAGCAACAAT
GATTCTAACAATATCAACGGTAGCATTAATACCAATACTACTATTACTACTATTACGACT
ACTATTATTACTACTACTA
>LINE_comp42647_g1_i1
CGATTGTAGCGGAGCGCCCGTTTGGTGAGGTGGGTCCATCCTTAGCAATCAGGGAAATCA
CACCGACTTGCTCCGCCTATTCCATCAATATCCTACCCCGGGGGTCTGTAAACGAGAATC
CCCTGGCGGTAGACTTTGCATTGAAGTCACTCATTATAATGGGGATGCCACGTGCTGTCC
TGAGAGCCATAGCGATGCAGTCCGGCTTGCTCTCGTAAACCTCTAAGG
>LINE_comp42813_g1_i1
TACTTTCCCGCAATCGTCGCTGGAAATCTAATTAAAATCCTAGGCCAGCTGGTTCACCCT
TCTAAACTGCTACCGTATCGTTTTTAATTCGCCTAATTCTGCCGCGAACGTGACCGGTGG
TCAGCTACTTTTCTCGCTTCTAATAGTTTCGAGTTGGTTGGAAGACAGTCGATTCGGGAA
TAGATGTTTTTCGGAAGAAATCGTCAATCTTCCATTGTAAATGGGTTAACGATAGAATGA
AGGATTGCTCGACGACGTTCGGTTAATTCGATTGATTTATGATATATAATTTCTTATGGG
AATTAGAAGAGTACACTGAGGTTTAAGGCTACTG
>LINE_comp43023_g1_i1
GCTGGGCCCTAAGATTGAGCCCTGGGGGCAGCCTCTGGTTACCTGTTTCTCTACGCGAGA
CAGTTTCCCTATCAGAGAGGCCGTACGGTCGTTAAGATAATCCGCGACTAGCTTATACAG
GTTTCGCGGGCAGTTCCGTTCTTTGAGGCGAGAGAGGACGCTGGGCCACCACACGTTGTC
GAACGCGCCCGAAATGTCGAACAAAATCGCAAGCGCG
>LINE_comp43083_g1_i1
CGACACTTCTTTCTGACAGCGACTCTCGTGACGCGTGCAAACGCAACTGCTATTACTGGC
GACAAATTCAATTCATTTGGGATGGTAATAGAATAAAATAGAACGGAATAAAGTAGAATA
AATTAAAACAGAATTAAATAGAATAAAATAGAAGTGCAAACATCGTTGCAAGTCGCTACC
AGAAAATTTATTGATCCTGGATCACTAATCTACTGCTGAGCAAAGAATTTGTAATTAAAC
AATTTGCAGCTGGTAATTGAATAATCGAATTATCTAGAATACTTCATTGCTTAAGAATTC
TTTTGGGTCTCGCGAAATTTAAATGGAGGTTCAGACAGGACCGATCGGATGAGAGTTCGA
GGAATAAAGACAGCATGGAACTGGGTTGAAATTAG
>LINE_comp43129_g1_i1
TCGGCAAGACTTCCCTGATTTTATCGTTAGTCAGCGAAGAGTACGCTGAAGATGTACCCT
GCAAAGCGGAAGAAATCACGATACCGGCAGACGTTACACCCGAACAAGTGCCAACGCACA
TTGTTGATTACTCAGGCATATATCAGTAATGTTTGTTTTGCAGTGTTGAATGATACTGCT
GATGTATCCGAACGTGGAGTGATAATGAAACGGATACAGTGATTTTTATGTAAATGTTTT
GCGTATCCTAACGATATGTTTATTTTGACAAGATTCTTCG
>LINE_comp43156_g1_i1
AACAATTCGATGTCCAGTGTTTTCCTGTATATTTAACGCATGCAGGGGTCCTATTGCAAT
AATTTTTAGTGTGACCTTTACAGTAATTTAGTATGTTTGGCAACGAATACATTGCGGAAT
GTCTCTTTTAGCTCAGGGAGGTTCGAAAGATACTGTAGTGTTAAGCAGTCTATCTATTTT
AGAAATTTCTTTGTTATTTTCCAAGCTTGAGCTCAGTGAAGGATAGCGGCAACGGTTGCT
TCGTGTCGTG
>LINE_comp43401_g1_i1
TTAATTGGTTTTTCAATTGTTGTCGTTCCTCCTTTTCTGTTTCCACTGAGAAAAACGTAT
TGTCCAACTTGTTTACCATTATTTTGTAACCAGTTACTTGATTGGTTACGGCAGTGGCAA
TCCTTTGCACTCGAAAAGCGACCATCAGTTGCCATTTATTTTATCGCACGAAAATTCTTG
AGTTCGACATTTAACGTTCAAGTCTGTATAGTATCATTAATACACGGAATATCGTAACGA
AATCGCTCTGTTCTTTAATTTACGTGTGGGTTCAGTGAGGA
>LINE_comp43598_g1_i1
AACACTGGCTTACTCGCAGTTCCTCTAATCTCCGGTGAACGAACCAATTCCACCATTCTT
ACGCGAAGTGACCACCAAAAGTGTCCATCGACTTGTTTAATCTTCCTGAACAAGCTGTCC
TCTTGATGCCAATGAATCTTCTCTTGCAATCAACCTTCACGATCATCTTGATACCCCACT
TCGCCGACGATTAACTTCTACCCTTCGTCCGTCCCGTGAACCAAGCCCGCTGAATCGAAG
GAACGGAAATCGTCACTGCGAGAAGCACGCGGCCAAGCGCAACTCGTTCTCCGCCGTCGA
TCACCGAACCCTGG
>LINE_comp43612_g1_i1
GAAAATCGGAGTCGGAAATAAATCGTTGACAAGGTTGGCCGACACATTTTTTTGTAGATG
GTTTAGTGGTCGAAACCATTGTCGCAACATTCATAAAAAAGCCGTTCAGTTGAACAGTTA
AAATCATTTGTCAAACGAACATTCTTATAAGGGCATTCGTTCGAATCGATTTATAGGTAT
TTACATGGTCAATCAGCCGACACCATTGCGCAGTATCAGTTGAAGCTCATTCATAAAAGT
TCAGTCGTTCGGAACTATCATCAATCGTTAAATTCGTACGATTATACAGTATCATTTTTC
GTGATCAAGAACTAAACGCATCATTAACTTCATTGCGTTGAATCCAAGTGCCCTTTAACT
AGGCCGGCACTACACCACGAGACAGCGCACATTTCCTCCAACACATATCATTCTATGGTT
CTCAATCATACTCCTGAATGCAAATGAACG
>LINE_comp43761_g1_i1
ATAAAGCCATCGTCGCGGAAACGAGTTCTCGGCCCGTGTATTCCGGATACAATGAATCGC
GTTCTTCAACCGAAATTTAATAACCATACCCGCGGAGCTAGATTCCTAGGTCCTGGCACA
GTGGTTCTTAACCTCTTCTCCGGCACGGACCCCTTTCAAGACATTTTTCTTTGTCCATGA
TTTCCAAGATTTGTGTTAGATGATGAGTATTATATGGATGTATGTCTAGTGTTGTAAGAT
GATTGAGTACTAAAGCTTCAAAGGTCAAACTTAAAGGCTGAGACATCTGAGATTAAAGAC
TCAGCTTTAAAGACAAAGTCTTCGAAGCTTTAAGACTCAGACTTACAGACAATGTCTTTG
AAGCTTTAAGACTCAATCTTGAAGGCAAAGTCTTTGAAGCTTTAAGACTAAGTCTTACAA
GCAAGGTCTTTGAAACTTCAAGACTTAGTAT
>LINE_comp44362_g1_i1
TAAATCATTGATTCCTATTAGAAACAGTGTGACGCTCAGTGCCGATCCTTGTAGTATTCC
ATTATTGATAGGTGTTGATCTGGAACGGGTATCGTTTATTCTCAATTTGATTGACCGGTT
TTCAAGGAAGAGTTCTTTATGAAAACAATTGTATGGCCATTTATGTTTAGCGACTGAATG
GTTTCGATTATACTTGGTCTCTGAATTGTGTCGTATGCTTTTTATATGTCTAAGCATAGT
TTAACTGGATATTCATTTTTCAGGAATGCATCGCATATATTCGTTTCGATGTG
>LINE_comp44572_g1_i1
GAGACAACTGAAAAACGGATAGAATATTTAAAAAAATAGAGCAGCGGCTCGGAAAATATT
CAAACAAAGTAAAAGAACATCCTGGATCAATTATGTATCCTCTTTAAACAGTCAAGCGTC
AGATACGAAAATCTGGAATAAGATCCACAAAATCAGCGGTACTAAAGGAGCCAGAGGAGT
ACCTAAAACGTTAAATTTCAACAATGTCCTTTTATCTGAACCGAACGAAATTGCAGACGC
TATGGGTAAAACTTTCTCAAACAATTCAAGCGATGGTAACTATAACCCACTTTCTGGAAG
CCAGAGCACGGTTAAATAGTCCG
>LINE_comp44753_g1_i1
ATATTACGCTTATACGCCGGGTGATGAATCGCCGTGCGCCGCTGTTATCGCCGTTCCACG
GAAATTCGGCAAATCGATCGAATTTCAAGATCCCGATCTCCTTCGAAATACTTCGAATTT
TGTACTCATATGACTTTGCGTTCTTTGCACTGCGATTAGGGTTGTACCGAAGCGAATTGG
ATTGTCTTCGATTTGACAGTGAAAAAACAGAAATACTCGAACACTAACACGTTCACTGCC
ACTAGAATTTCGAGCGTTCTGTGTAGCAATATTTATTCATTAATAACAAAGGCAAAT
>LINE_comp45006_g1_i1
AAGAATATGAAACTAATTAGGTTGAAAGGAAAATAATCAAATTCTAAAAAAATTGATCAA
ACAACGAGAATACTTAACAACAGGAAGCAAACGGTGTAGATATCGATGCAAATATTAAAT
CTTTATACAAAACAAAATAAACATTCCTTTCCAATTCAAAATACGAAACGTCACTAATAC
TCAACTACGAGAAATCTAAAAAGTCGAAAAATCTGAAAAGAAGCTAATGAAACAACGAGA
ATCCCCAGCGATAGGAAGCCAACGACGAG
>LINE_comp45294_g1_i1
TATTTAGATATTTAGATATTTAGAAATTTAGACATTTAGACATTTAGAAATTTGGAAACT
TGGATAGGTGGAAGTTTGGGGATTTGGAAATTTGGGAATGTGGATATTTGGATATCCGGA
TAGTTGGAAACTTGAAAATTTGGATCTTTAGATATTTGGAAATATAGACATTTAGGAACT
TATAAATTTAGACATCTAGAAATTTAGACATTAAGAAACTTA
>LINE_comp45437_g1_i1
GGGAACGGCCAGACGATGGAAGAGTCGCGCCGCGCCGCTTCGCTTCGAGCCGCGTCCGAC
CCGTCGAGTCCGCGGTAATTCGGGGACGCGGCTCTAAATAAAAGCGGCCGTGCGTATCGT
GTAACCGTACGTAATTCCGAACCTCTGGGCCAGTTTAGATAACGAAAAATCGATAAAGTG
TTCGCGCCGCCGTCACCGCTGCCACCGCCGCCGCCGC
>LINE_comp45579_g1_i1
GCCATATTCGTCACCGACGGCACGTTCGACATGGACGCCATGGAGGCCATAGAGGCCATG
GAGACCATGTTGACTACACCGGGCATGGACGTCAGGCCAGCGACCGAAGTCAGTGGACTC
ATCGCCGGCTGCACGGAAGCAGCGGACAACGCCAACTGGTTCTGTATTTGCTGTTGCTGC
TGTTGCAACTGGTGTTGCTGTTGCTGGTGCTGCTGTAACTGGTGCTGTTGCTGTTGATGC
TGCTGCTGCT
>LINE_comp45692_g1_i1
GAATAAAGTTTTATTTTCTCGTTACTCTATGTTATTGCTTGGTAACGTTATTTACGTAAT
AATGCATTTCCAATTTGTCGTTTTTTCTATATTACATTTACAACTAGCTCTATTGATGTT
TCTTAAATTATTTGGATTTAGTCTACGCAGTTTTAGAGTCTAAGCCTTGCAGTTTGTGTT
AGGTTTTTAGCCAATTCATTAGTACATGCATATTCTCAATTAGTTGTATATGGTTTTTAT
ACAACTAAAAACTTTCTTCTTTGCTGTACCATGAGGCGACTGTTGTTGTTCGTAAGGCTT
TGTTCTGAAATCATTGTATACTATTTATATTACTTTTTTTCACACAGCGTCAAAGTTGGA
TGCCTTGTATCCACATTGGAGCAATCTCAATTTTGTATAGCAGTAACTTGCTTT
>LINE_comp45893_g1_i1
GTGTGCTCTTCCGATCTGTCGATAAACTCTGTTACTGTGCACACAACAATTTGCTCATAG
ACGGCATGTAGATTTCTGTCAAACAGTCTAATTAACGTGATATTAATTATCCTTTGAACG
TGTAACATGCATGCGACAAGCGAAAAATATATGTAATTGTTTATATATATTCATGTGTGT
GTCTCTGTGTGTCTGTGTGTTTTTATATATAT
>LINE_comp45988_g1_i1
GCAACAACAGCAGCAACAACAGCACCAACAGCATCAGCAACAACAACAGCAGCAACAGCA
ACCGCAACACGGCAGCAAACCGCCCCGCAGCAATGGTTTGATATGCGTGGTCTGCGGCGA
CACCAGTTCCGGGAAACATTACGGAATCCTCGCTTGTAACGGATGCAGTGGCTTCTTCAA
GAGAAGTGTTCGACGGAAGCTGATATACAGGTAAACTTAAAATATTCATCGATCAAGGAA
TATATTTTTAGTGTTGGGTTATTTT
>LINE_comp46281_g1_i1
TTGTAGGGTAAGGGGTTCAAATTGTCTCGGTCATTTAAGTCGTTCAGAAGTGAACGCGGT
TGAGCGCAGAGGAGTTAATGTTCTTTAAGCTATTTTTAGCTGAAATATCTTCGGAAGCTA
TAAAAAGGAGGGCCTCCTGACCTAGAACGAACGAAGAAACGGATCCTCGAATGGCAAAAA
GGAATATTATTTGTTCCATTGAAATTGACAAAAATCAGACAACATCAGAATCGACTTAAC
CGCGTCGACTGTCGAGCGACTCGTTTATGGAATATCTTTTTCTATGACTGCAGGAACATC
GTCCGGGGACTGTTTTCCTTGAATCCTTATTGTTTATTTTG
>LINE_comp46592_g1_i1
TGAATGGGGAATGAGAAAGCGTGCAGTGAGAATGGTGTACAAGGGGTTGTTTGTTGCGTG
TGTGATGTATAGATCGAGTGTATGGTGTGATATAATGAAGTATGGGTATGCGAGAGATAT
GATGAATAGATGGCAGCGAATAGTGATGTATGCATGTATGAATGTTTGCAGGACTGTGTC
GACCGAGGATATGCAGGTCCTAATAGGGGTCCCACCTTGATGCCTTGAGTGTGTGAGAAG
AGGTCTAGTGTGTATGATTAAGA
>LINE_comp46701_g1_i1
GATCGCCACACGGCCCCTGGGGCACCACACGGCCCCTGGGGCAAGCGAGAGGTCAATTCG
ATGACGTCCGTTAGGACTCGGCGCACCGCTGAAAAGGCGGGACACACCTCCAGCGTGTGC
TGCGCCGAGTCCTCCTCCTCGCCGCAATGGTGGCAAGCCGCCGTCGCTTCCCTACCGATT
CGACACAGGTACTCACCGAAACAACCGTGTTCGATGAGCACTTGTGTCATACGGTAGGTG
AGCAGATCGGAAGAGCACACG
>LINE_comp46768_g1_i1
GATATTTGTTCAGACTATCAGTGATGATAACGTTATCGTAACTCAGACAGCTCTTTCATA
TCCTTCGCTGTAAACGTAACAATGATGCATTAACACGTTTGTTTTCGAAGATATTTTTCA
GAAGTTATAAATTTGCGGAAAAATATTTTTACTTGGAATATTAACTGTTATAATATTCAT
TCTTCAAAATAGAACAACCTTTTTCTTAAATACCTGTGAAACAGTCATGGTCATATGTTT
ACTTTTAGACATTTGTCTTACAATCTCTTTGCT
>LINE_comp47119_g1_i1
AGTCCTTGATCAAGAAATTAGAACCACCATTGATGTCATCTTTGAGAGAATCAGCAATGC
GTTAGCAGTCTGATTCTTGTCTCGTCGTGTTTTCTGATATTTATTTTGTAAACTTGATCC
TTAATTTGCTTAACTTTTGATTTTAACCCTTTGTATTCTAGGATTTGATTTTCAACGTTA
AACTTTGTGTAATGGATTAATATGTGAAATATTGAGATAGAATCGTTTTCCACCCCAATT
>LINE_comp47612_g1_i1
GAATAGAATAGAATAGAATAGAACAGAACATAGCATAACAGAACAGAACAGGACAGTTGC
TTATTGGTTCAGAGCAAAGTGGGACGCACGCGAGATACAGGTGTGCAAGAGAGACAGCGG
GAACACGTGACACGTGAAACGCACGCTTCGCCAAAGTCACGCGATTTCTTCCCTACAGGA
ACGAGGAGCAAAGAACAAGGAACAAAAGACATGTTCGATGTAACGGAGATGAGCGAGTTT
TGCTCTTCGAATGACAGAGAAAACGGTAGATAAGAAGGTAGGAAGAATTACGAATATATT
TCGATGAAGAAATCTGTAGAAGGGAAGGCGATACTACGAAACAAGTGTCGAGTCGGTCGT
TCGGTAGGACGGCGTGCGTGCCTACCAAGCGAGCGTAGAGACAACAAAAGTGAAAAGAGC
GAGAGGGAAGTAGCGAAGTAGAG
>LINE_comp47774_g1_i1
TGTGTTAGGTATACGGAATTGGAAGGTGTGAGGGAATAGTTCCGATATTTGAAGAATGAG
ATAGTAGGTTTTTGGTTCTGGAGTGTTTGGTGGTTGGATGTTTGATTTGGATTGTGGAGT
TGCGGTGTTGTAGAGTTATGGAATTATAGAATCATGGAATCATGGAATTATAGAATCATA
GAATCATAAGATCATAGAGTTATAGAGTCGTAGAATGATAGAATTACAGAATTACAGAAT
TACGAAATTATAGAACTACAAAATTTTGGAATTACATAATTACAGAATAACAAAATTATA
GAATCACAATCTTTTAAAATTACAGAATTACAGAATTACGAAATTATAGAACTACAAAAT
TTTGGAATTACATAATTACAGAATAACAAAATTATAGAATCACAATCTTTTAA
>LINE_comp47851_g1_i1
TGGCAGCAACGAGAATAGGAAATTCCTTGCGTATCCAGCCGGGAAATCGGCTGGATATCG
TCAAAGTTAAGTCTACAGGAGAAAATCGAGGTTGCCCTGGCAAAAAACCGTAAGAACAGA
GAAGGACGCCCGCGGCCCGTAGGATCCCCGAACCCTTCGCCGGCTTGGGCTCCGTTCGGA
TCGGTTCGGTTCGGCTCGGTTTCCTGCTGTCGCCTTTGTGCTCGTCATCCTGATTCGATT
CCCCCGTGCGCTCTCGTAGGAAACGGAGCG
>LINE_comp48136_g1_i1
GCGATCTGAATTGACCGTTAACTATGAAAAATTCTTTGCCATGAAGCATGTTCCAGAGCA
TTTTTACTAGATGAATTGGGAATTCTTTCTTTAGTAATTTAAAGAAGAGCCCGTCCAGCC
AGACAGTATCGAAAGCCTTCTCGAGATCTATGAGCAGAACGGCGACGCAATCGTCGGCGT
TTCTGGCCCAGCAAATGTCCAACATGAATTTTGTTATCGCGTGTACTGTGGAGTGTTTGT
GTCGAAATCCGAATTGCTCTTCTGGAATTATGTTTCTCGAATTGCAGAAACCAACAATCG
TGTCGTTCAGTGTTGTCTCGAAGACCTTGCTAATATTTGGGAGAAGGCTGATTGGGCGGT
AGCTATCGGGGTCGAGGCCATTTTTTCCTTTCTTTTTTATAGCAATTAAT
>LINE_comp48262_g1_i1
ATTTATTATTTAATATAATATTGCAAATTGAGTTTTGTATTAGTGGGGTTAAAAGTTTGA
GGTAGCATTGATCTGACAAATTTTCTGTTGAATACTACAAATTTGGTTTGTTCTCTTCAA
AGTTGCTTATGAAAATTGAAATTTTTGTAAAAGTTCGAGTCTTCATTATAACGAAAGCAC
GGGATAATTCAAATGCAGAATAAATGTAAGAAGGGTCTCATAAAAATGATTCTGAGCAAT
GGATTTTGTTTTCCTTTTGAGAATTCTACTAAATTGGAATGAATACAATAAATTCGTGTA
ACATTCGCTACATTAAAGAA
>LINE_comp48624_g1_i1
GTTTATGAAAGATTTGACATGTTCGTTTCCGATCGTTTAAATGCAGTCGGTTACGTGCAG
GTTATGTAACGCGAAAAATATTTGAAACGATCGGAACGTACGTCACGAAAGTGACACGTC
GGAAAACGGTTCGTTAAATTATCCGTAATCGAGAATATAATAGCAGGAATTTAAAGACGC
GTTCGAAGAAATATTACGTTACGCGTACCGAGCGTTTCGAGAAACGAGAGGTCAACGGCG
TAACGACGCCACCCGCCATTTTAAGGACGAACCTTTAAGGCTATAACGCACGGT
>LINE_comp48824_g1_i1
GGGTGACCCGGGGACTGCGGGGCAAGAAGAAAGTCCCGGGGCCGGGCGGAATCGCTGACA
AGGCTTGGGCAATTGACCTAGGCCTCCTGAGGGATAGACTTCGTGAATGTTTCACGGAGT
TGTTGAGGTCCGGGACGTTACCGGGCCTGTAGAAAGAAGGGCGGATGGTCCTCCTGAGGA
AGGAAGGAAGACCCGCGGATTCTCCCTCCGCGCACCGGGCGATATGTTTGCTGGACGAGG
CGGGCAAAAT
>LINE_comp48856_g1_i1
GTGTACTTATGTGTATGTGTGTTGTACGTGGTTATGTATGGTAAGTGTATGGTACGTCTC
TATCCATATGTATATCTATATGCGTATATACATATAAACATACACATGTATATATGTGTA
TACATATATATAATTATTGCGCACACATGAACATAACGAAAAATATATCAGGATATTTTG
TGCTGACATAAATAATTTGGTTGAAGGTCCCACTCGCCCTTTCTTTTCTCGATCTTACCC
GCTATGGTTCCGTATTTTTTATTTCTTTTGTCGTTTAACGAGCGTAGAAAATGAGGACAG
GGTAAAGGGATCATCGTCGCATCATTCAGGCAGCATCCTAGTGTCTATTATCCGTAACAA
TAATAATCCTAGATTAAACACGCTAAATT
>LINE_comp48872_g1_i1
ATATATTATATATATAAATATATATATTATATATATCAAATGTGATACGTTATGAGTTGT
GTGTATGCGTGCGTGAATGATATATAACAACTTCAAGGAGCAGGATGAGAGGAACGAGCG
ATTGGTTGAAAGAAAAGCAAAGAAAGATACAAAACGAATAGAAAGGAGAGAGAAAAGAAA
AAAGAATAAGGGATGAGGTGTGTGCGTGTGTGGCGCGTGGGATT
>LINE_comp49114_g1_i1
GTACCAATGAATATTTCGTAACATACATCCTCTATGAAAGGATTAACCATTCCATTATTA
CTGTTTGCAGGAAAAGCATTCGCGCGTAGAGATAAGCTAGTTATTCACATGAATAAGCTC
AGACACAGACCAGGGGTGGCGCCGCTGTCTACGCCCACCGCCCCGAATTCGGATCAGCAG
CAGCAACAGGCTCAGCAACAGCAGCAGCAACAGCAGGCG
>LINE_comp49253_g1_i1
ACTGCTCATCGAGGGACACGGAACATCGAGGATTATACGTATAGAGAGACTCGATGTACC
CGTAAGCGATGAACCCTAATCTCTTGATAAATCGATGTAATTACCGAGCGAATGGATCGA
GCCGTTTTCATCTGCTTTTTCCTACCCGCAGACATAGACAGTTATACGCTTCCAACAATA
CGCGGAGTCTACTCTCGATATTTATATATACATGCATGCACGTATGTGTACGTGTATGTA
CGGGTACACACCGTATGACTTCACCACTGGCCAGG
>LINE_comp49495_g1_i1
GCTTCAGAGTTTCCAAGTTTCCATATTTCCAAGCTATCAGGTTTCCAAGTTGTCAAGCTT
CAAGCTTCAAGCTCCAAGTCGTCAAGCTTCAAGCTCCAAGCTTCCAAATTTCCGCATTTC
CGAGTCCCTAAATCCTTAAGCCCCCAATCTCCCAATTTCCCCAGTTTCTAAATCCAGAAG
TAATAGATTAAACATTCATTACGAAGAACTAACGACCCTGCAGGCGTTGGAATCCCGTCC
TACAACTATCCCAACACGAGCCAAGTTAGACCCTAAAACCGGACAATCCCCGGTTCCTCC
CACCACCGTCCCTCGCGTACAAAGTAACAGTCAATCCTCCCCAAAGCGTATTCAATGAAG
CCCAATCGTAAATACAGATAATTGAAGTTCCGCCGTCGTCGCAGATCAGACGGGCCCTCC
CTCACCTTCGTTTATATTCGTCCCTTTGATCCAGTTCG
>LINE_comp49578_g1_i1
GACGCTCTTCCGATCTCCTCCACACGCGACAACTCCGTGTGTCCTACGTACACACCGCGC
CGCTTTGCCTCGCACGGCCACCCCTTTCGCCGTAACACCCTTCCGCGGGCTTACACCACT
CCTGGCGAGCCGTCCTTCACGAAAACTGCGCCCCAGAGTAATTCACTTCGGACTCTTTCC
CCGATCGGGAGCAGCAGGTGTTTCCCGTTGCTCCGCGGCCGCTATATATATATATTTTTC
CTCTCGTTCCGATGAGCGGGATCAACGGGACCTTTTATTGCCGGATACGGAATTAGCATT
CCAACCCCTCGCCGGGTTAAGACACTCT
>LINE_comp49689_g1_i1
GGACCGACCCCTTCTAAACCCGTGTTGGGCCCCATTCATTCTCTCATTCACTAGACACTC
AACACGATTCACCATCATTCTCTCGAGTATTTTACCCAACACGGACAACAAACTAATAGG
TCTATAAGACCTGGGGTCGGCCCGCACTTTGTCAGGGGACTTCAGAAACACAATCACTCT
AGCTTTTTTCCATTCACGCGGGAAAGAGTTTGTTCTCAAACACTCGTCATACACTCGCTT
CATCCATTCCGGAATTACACACCA
>LINE_comp49940_g1_i1
ACGACGCTCTTCCGATCTGTATCCTTCTCGCCTTACGAAGCCAGAAAACGTTCTTCGAAC
GAGAAGCACGTGCCCTCGTTTCCCGAACGTCCTGTTTCAGGTGCGACCGTCGAAGCCGTT
GTCTCAGCTGAAGAAGAGGCTGAAGGTCCTAGCAGCAGCCAGGGAAGCTCCGGATCCGAG
AGTCCTGTGTCGACTGGACCACAGCATTTCTAAAGCAGCGTTGAAAGCTGTCCCGTCTAG
GCGTCTGCTGCTGCTAGCGTTGCCGCACGTCAAGCTCTGCGACTACGGTCGCGTTTATTA
CAAAGTTTCCGCCGCGGCCTTGAAGTATACGCCGTCGGAGAGGATACTCGCGTTGAGCCA
GCCCCGCGAGTACACCTCCGAGAAGCCCGCGGAGAAACCACCTCGCAGAGTGTCGATGTG
CGGGGAGCCCGAGCGGACAGGCATCGACATGGACAGGTGTGCACGGTTAACCTCTCAGGC
ACGGCTGAA
>LINE_comp50026_g1_i1
GCGAACATTAATTTTAGAACGATCCCGTGGGGACGCGTTCCCATGGAACGGTTTAGCGTC
GACTGTTCATCGGTAGCCGGCAGTCATTGCCCTGATTGGTCTCGATTAAAATCGACTTGC
GAAATCGTCCGAACGATCTTCGCTGATGACATCAGACGACCGCTGCGCTGCGCTAGCTCG
CAAGAAGCGAGCAGCAGCAGCAGCAACAGTAAGAGTAACAGCAGCAGCAGCGTGAGCCTG
CGCCGATGTTAACACACCGAGCGTGGTTTGCGCAAGGGCCCGAATGAATAATTCACTCGA
ATTCGCGGACGGGAAAAGGAAACGGCGATAGGGGGAGAGGAGGAGGGGTGACGCGGCCAT
TTATCGAGTCGTTGAACGAGAAACAGGATATTTAATAATAATCGTGACAGTAATACGCCT
TTATTGCGCGTCTTGCGTTACCATTACGGTAACAGAATAAGGAATGCAGTTTCGAACCGC
CGCTGCTGGGCTCGATCGTTACTTCTCCGCGTTTCCTTTGGAACGGGGTTTGCGCTTTCC
TGTGCTACGTTGGGATCGACGGAGGTTTTAACGCTAAAACTACCGAGTAAT
>LINE_comp50031_g1_i1
GCCTTGTTCGCCGCTCTTTCGTTAACCGTGAAGACTCGCACCGCCCGCGATTATCATTCA
TTTGTATTCCGGGGAATCGTGGGTTCGCAGTAAATGCTTAATTTATCGTCCACGGGACGC
GTGTTGCCTTTTGCGGCTCGCCCCTCGGAGGACCGTCTTTACGCGACCATCGAAAAAGAA
GAACGATCGAACGGAACGGTCGACGCCGCGAATAACACGGGGATTTTTCTTTAATGGCAC
GTTCGATGAAGACACGATGTTGCTTCTTGTAACATCGACCGA
>LINE_comp50195_g1_i1
AAATGATATTAAATTACTTCTGCTTATATCGGCCTGCAGGTCGATAAAGAGTTAGTTTGT
TAGGAATTCGACATTCGAATGTCCTTCGACGAGTACACGCTCCAAGACGGAAGGAAGACT
GAAACTCGAAAAAAGTTGTACAAAGGGAAGAATAACGGTGATGATTTCGTCTTATTCGAA
CCTTCGAAGAGCCCTCTTGTTGAACGCGCCAAGAGAGAAACGCGCTATCTTGGAAACGAA
CGATGAAACAGTAGAAACAACGCGTGTCCTTTTCCCAGAGATGAACCCTGCGGGGGTGGG
ATCAGAGGGCACCGGAAGGGGAAA
>LINE_comp50405_g1_i1
GGTATCCCTTCTTCGATAATCAAAGAGTTTCCCTCGGGAGGGATTGAAACGTCGACGGAA
TATGATTGTGATTAAGAAACAAACGAGAAGCGCTTCCCGGGGTCGAAGAAAGGGGCTCCG
GCGGAATTCGCGAGCGGTGACAGGTGCGGCGAAAATCTTAGAAAGTATTTCGCCGCGAAA
CAGAGCGAAAATAACCTATAACTTTAATCAGGGATGAATAAAGGCAACCCTTTTCGGAGC
GGCGCTGCGTCAAGGCGAAGAATGGAGATGAGGATGTAGCCGAGTATCGGCATTGTTTCC
AAACAAAGCACGGCCTTTCATACCACCGTGTACCCGCCCTGCAACCCCCATCCGCTCGGT
CCACCCACAACCACCGCCCGTGCACTCCCCACGGCTTTTCAGTCATTTGACACGCAAAGA
AGTCAGGCAAGCCGGCATTGTGGCGACCACCACCACTGCGACCTATTGTTACCAGACCAC
TACCATAACCGCCACCCCCGAAATCCACCCCGTCCTTGCCCGCCAGATCGGAAGAGCACA
CG
>LINE_comp50580_g1_i1
AGCTTTCAAAGCCGCCTCCCGTGTAGGGCTTGTGGGGCTTTGAGTGGCGCTCCGCGTGCG
AACACCGTGCACATTTCCCCTAGTCGTATCCCGTCTCGTGTCCTGAGTCGTGCTTTTGCC
GTCGTCAGTGTTCCCGTCCGGGGGTTGTCACACTAATGGCCGGTGCACCCACCGACCACC
CCCCGGCAGGTAGTGCAAGCCGGGGAGCGCCCCCTCGCCGTGCGGACCACAGCTTAGGGC
TAGGGATTTTTTATAGAGGTTGTCAT
>LINE_comp50670_g1_i1
AGTTCGTAGTAACTCCCAAGTTACTCGATTCACGAACCGATCGAGAAAATTCGAAGCAAC
AAGATCAGTTTGCAAATTGTGCGATCATAACGATGAGTAACAATAACAATGGCGACTGCG
ACTACGGCGACGACGACGACAGGAAGAACAATAACAACAACAACAACAATAATAACCACA
GTAATAAGAACAACAATCATAGCAGCAGTGGTAGCAGTAGCGGAAACGGTAACAACAACA
ACAACAACAACA
>LINE_comp50865_g1_i1
TCTCTCTCTCCCTCTTTCTCTTTCTCTCTGTTGCACCGTGTCCCTCCTACTCTTTTTCTC
GACCCTCTTTTTCTAGCCAGTCACGACACTTCTTCGTCCCTCCTCGTGCACACATACATA
CACACGGGCGCGCATATGCATACACACGTGGACACGAACCTGCACACACGCTCGCTTTCC
TCGTCCTCCTCGCTGCATTTTCTCTCCCTCGCCGTTTTTCTCTCCGCTATCCGCCGCCAT
TCCCCTCCCG
>LINE_comp50980_g1_i1
ATATCTATATTTATGTGTGTATATACATATATGCATACATATACACATACATATACGTAT
ACATGTACTGAAAGAGAAAGACGTTTGTTCGTACACACGTGTGTACGTACATATATATAT
ATACATATACGTATACATATATAATATAGATTTTCCTTTATTTTAATGCACTAACGAACC
TCACCTTGCCGAGGTGACCGCAAAATTACGAATCGGCGACACCGTCTCCTCTCAAGCGAC
GCGGTTAAAG
>LINE_comp51075_g1_i1
ATCGGTGCGCGCCGCGGGGGTGAAAAAAACAGGAGGGATCTGGGTCACGGGGAGCCGGCG
CAATTTTTAGCGGCGGGCCCTGCATCGAATCCCATTACACGCTGAAAGCGTATAATTTTA
GGCTAATGCGAAAGTCCCCGTCATCTCATTGGACCGAAAGGGCGGCGTATCCGCGCGACG
GGAAGGCGCAATATGGCGCTGAAATTGTATTAACAGCGGCGTAGGTATGCCGAGTCATGC
CGCGCGCCGT
>LTR_comp291_g1_i1
TGTAAAAATTGTATACCACATAGAGAATTTCAATATTTCAAAACTTTTGAAGAAAATAGA
CTTCAATATATATTTACCTCGTTCAACTGATAAAAGTCAGTACAAGAGATAAAATAAAAA
TGCGAACAGTTTTTGTAATTTTCCTAAAAAAATTCTAATTCATTTTCGATCGACTTAAGA
GTTCGCTCACAGTGATAACTGATGTGATTATTTGGAGAAGGGTCTTTAACGGTTACTGTG
CAAATGCCTTGCGTTTTTATAAGATATTCATGTAGTATACCAGTAGCATCGTTCAGATAA
GTAATATTGATGTGAGTTAATAGTGTCAATTTAGAGTTCGTAATTTGGGCAATACCTTTT
TTATTATAAAATATTCCACTTGCATTCGTAAGTGGTCGGTTATGGTAATACTGACTCATT
GTCGGGAGGGATAATAGGAGGAGGAATGGAATCATCAGATTCATCTGGAAAGAACAAATT
AAGGAGATTAGTATGATATTTCTTTTTCTTTTTGCCGATTTGGAGTTCCACTGTATTATT
TGGAAAAACTTGGATGATTCGATAAGGTCCACTAGCTTTTTGACAAAGTTTCTTTGATAG
TCCTACTTTTATTTGCATATTTTTAATTTTTACAAGATCATTTACTTTAAATTCTACAGG
TTTAGAGTTACGATCGTAGTATTTTTTACTTGCTTTCTTTGACTCAATGATATTTTCGCG
AGCGTGTTTAAACCCTGTATTTAATTTATATTGAAGAGATCGAATATAATCATCATAAGT
ATAGTGAAATTCGGGATCTCGTGTGATCGATGAAGGTAAATAAGCCTTTCTACCGTAGAG
TATTTCATATGGTGAAAATTTGGTGGATTTGTGAATCGAAGTATTGTAACTAAACATTGC
GAATGGTACAAATTCGTCCCAATTTTGTTGTTTACTATTAACGTAATGTGTAAGATAATC
TTTGAGGGTCAAATGAGATCTTTCGAGAGCACCATTAGTTTGCGGATGATAGGGAGTACT
AGACAGGTGTTTCGTTTGGAATAATTTGTTATATTCTTTGATTAAATTGGACATGAAGTC
AGAACCTTGGTCAGATAAAAGTTTTTGAGGAATTCTAAAATTAAG
>LTR_comp452_g1_i1
ACTCCGTAGGCTCCAATATTGCAGTTATATCAAATATTTCAACGAACCAAAGAAACTACC
CTAAAATTATATTTCCCACACATCCAAATTTTCTACTGACAAGAAAATTAAAAGATCGAA
GGAATGTTGCATTTTTCATTTTCACTAGAGCTACCATAAAAAGTCGCAGTTGCTAATAAA
TCACAAAACCATCTGGAGTGCTA
>LTR_comp462_g1_i1
AGATGCGCTCCATTAACAATTACACTTGCGCGTACTGTTCTGTGTGTGTGAAAAATATTT
CTGTGCACTAATAGAATGTATTTTGCTTAACAACCAAAACTTGTTTCAGAGCATTGGGCT
CCTTATAAGTTTACTCCCGAACACTTATTGAAATTTGGACGGGATGCATGTTGTCCCATT
GGCCTAATAATACATGTAATCAGAGCCACAATTTCACCTAAGGACGTGAAGATTATTCAC
CCTTGGCAGTATGAATTTTATTTACATCTTGCGGGTAAGGTTATTAATGAAAAACTTATT
GGTGAACAGAAAGAGTTTATTGTTTCTAGCGGTAGGACGATTAGCCAACGCGTCCGTCCT
AACGCAGAGAATTGGCCCGAAATACAGAGATAAATTGTATATTTCATGCTTTTCAGTATT
TTGTTTGTGAAACAAAGATCTTTCAATTTTTTTAAATATTTATTACTGATATTGAGGTTG
AATGTGTATTAATAACAAATTT
>LTR_comp570_g1_i1
ACGACTTTAAATTTCCAACAACTGCGACGTTAGTCAAATATCGAGCTTAAACGAAAGATC
ACTCTCATAAACTTCATCGATAATTCATCCCTAACAGAGTCTCCCGCAAAACGACCAACA
TTCTCGACTTTAAACCTTCCAGAAGAGTCTCGAAATCACCAGGAGAGTGGCGAAACGGTC
GCAGAAAGGGTTCCCGGTAAATTAAATCCGTGTCAACACGTTCCCGAGCGTGGCCTTAAT
CTATCTCCCAACCGGCAGCGTCAGCATTGTAGTCGGAAGTTCGCTTACACGTCGGCCCGC
GTTTCCGCGGAAGAGAGCGGAGAAAAGAGGA
>LTR_comp599_g1_i1
AGGCTGTTGTTTTGATGCTACGACTTTGGGTTGAATTTAAATGTTTTTGTGTAACATCGA
TATACCTGTACGATTCTTCCAGTTTTTGGAGCTGACAATTTCGACAGTAACGGTATTAAT
GTCCGATTGTATCTCTCTACTTGTCCGTTTCCTCTTGGTATTCCTGTTGTTATCAGAACG
TGTTCAATCTTCTCTTCCTCACAATATTGTTTGAAAAAGCAACAACTATTATCAAAATGT
ATTTATACTGCTTTCTGGTTGAGGGCATAGGACCTAAGTGATCAATATGCAGAGTATGAA
GAGGAACTTCACCTTTTTCTATATGTAGGAGTAGAGCGGT
>LTR_comp599_g2_i1
GCCGCGAATAGGCTGGAAAGATCGCGAATACAACAATAATAACACTGCGCGGCTAAACAG
CTGATCCGGCGAAGCCGTTACCGACGAGCGCGTCGACCCCGTGTGTATCTGTGCACGTGT
ATGTATGAGTGATTGTTGACAAGCGAACGAACGGACACAATCCCAACGAACATCGAAACC
TCGCGAAGGGTTCGAAATCGAAGCTTGAGAATGTTCGGGCGCCGCGTAAATATAAGGACG
CGACCACGGCGCGGAAAGAGAGTTTACGAGTTACGAGTCACG
>LTR_comp635_g1_i1
CCTGAATCGTCGGTCCGGTGATCAAGGCATCGTTGAGGGAGACTCCACTGTTCGATTTCG
CGGACCCGTCAAACACTACGCGGACCTTCGTGGTTTCGCTCGACTCTTTTAGGACCGCGT
GATGAGGCAGGTAGAAACCGTGCGTGCCGGGGGTTTCCTCCTGGCTCATGTGCCCTAAGT
CGAGGTATTCCTTCATAACGTTGGAATACTCGCGTTTGAGCGACGAGTCCCTTTTCAGTT
TCCGCTCGAGTGCTGCTAGACGGTTTAGTGCGCGCGATCGCGATTCCGCGATGTCCCGTT
TCTTTTCGTTGAAGGGTAACGCTACGACGTAACGGCCGGTGCTGTCGCGTGTAACGTTAT
CCTTGAAGTGTTCTTCACATTCCCGTTCCTCCGAAGTCAGATGTTGTATATGAGGACCGT
CCTCCAATTCCCAGAATTTCCTTAAGTCGAACTGTAGACTTGTAAGGAAAGTCTGGGCCT
TGATACGTGATTTCGCGGTCGGAACGCTCCCCCCGATGATCCATCCAAACTGTGTTTTTT
GGAGAATCATGTCCGGTCCGTTTCGGGGGGAGAGACTCCGTTGCCCGATGCTCAGGCACG
ACAACGCAGGTCCGGTGCCGATGAGCATGTCCACGGTTCCCGGACGATGGAACTGCGGAT
CCGCGAGTCTGATGTTCGGAGGAATGGGAATGTTTGCGCGGTCGATCTGTTGATCCGGTG
TTGGACCCGAGATTTTTGGAATGGTGTAGAATGTTAACACACGCTGATAGTTCGCCATTC
TAGATTTTATCGTTGCCGTGATTAATTTCGTGGCTACCGTGCTCATTTGATTGAGCGCTT
CAATCGTTGTCGCGCTCTTTTGAGCCGGTAGTTTTAATTTCGCGGCGAGATTTTCGGTCA
TGAAGTTGGCGGTGGAGCACGTGTCTATCAGCGTGCGACACTCTACTGCCCTTCCGTCGC
GGTCGAGAACGTTGACGACTGCCGTGGCGAGCAGATTATTCGCAGGGACGTCGATCGCGG
AGGCCGTACAAACGTGTTGTACCTTTCGTGTCTTGGTTCGTGTCGGAGTCGGTCGTGTCG
C
>LTR_comp695_g1_i1
ATTCAGAAAAAACTTCGCGTAAATTGCGGATATCGGTGGATCCGTGTCTATTTCCAACGT
TATTTCATTCTTCTCTACATTTAACATTATCTCATAAGGCATAACATTGTTAATATTCTC
GCTCGATTCTTCCGCGATTCGAAAAACCTTATCCCAATTATCATTTAAATCTTCGCACTC
AGATAAGAAATTTTGGTTATTCGCGTTTCGCTTTTGCCTTTTTCCCTTAAAATTTTCCGC
GCCTTTATTTCCGTTTCCCGGCCTTTTTGTTTTGCAAACCCTCGCGAGATGTCCTATTTT
ATTACATTTATTGCATTTATAATCGCGAAATCTACAATTTGAAGCAACATGATTGTCTTT
ACCGCAACGAAAACATTCTTTTTCTTGCCTTGATTATTATTACGATTATCCCATGATTGC
GATCCGCCCGCTTTCGTCTTTCTGTTGTCGGAAATGTAGTTGACGGTTGCTTGGTCCGCG
TTCCGGTCTTTTCCGT
>LTR_comp708_g1_i1
CAACTCCTCTGCTTACGCGACAATGAGACCCTTCGGGAATTCGCTCTCGCCATGTTCCGT
TGATATTATTAGATCTGCATCTTTCGCTCGATCTGCGGTTTCGCTCGAAAAGCATTACGT
GTCTCGGGACAGGTGCGAAAGCTATCGAGGTGCTGAACATCGTCGAATTTACCTGTTACA
AATAGGATGGCCCGTGGTACGGTGATGGTTTGAAAATTAGAAAGTCCAAGTGTGCGAGGC
TCGTTGGTCTAGGGGTATGATTCTCGCTTAGGGTGCGAGAGGTCCCGGGTTCAAATCCCG
GACGAGCCCAATTTTTTTTCTTTCTCAAAATTATAAAAATACTTATCTATACAACATACA
ATATCAAATAATGAATGGTTACAAACAATTTTTGTGAAATTAATATATTCCAACTAAAGA
TTGTGATTATTTTATAAATCATTGCTTTCGCTTATTATACATGTATAATTGCATGAAGTT
TTTATTTTTTAATGTCGTTATA
>LTR_comp708_g1_i2
AAAGAAGACAAGACACAAACCTTGTTATTATTTAAACTCAGCGTGGTCAATGTCGGCATA
TGAGGCAAAGTTTTTAGGTCCCGAAGTTTATTGTTATCCAGTATCAACACTTGTAGCCTT
TGGAAATGTTTGATAGCGGTGATTGAGGTTAGTTCATTGTAGGAAAGATCTAAGCTCGTA
CAATCATAGCCGACGACACCTACCAAACCTTGTGGAATCTTTTCTGCACGTTGGCCCGTA
TACCATGCCTAAATTGTTAAAAAAACACGTGTATGAATAAATCATATATAAAAGTATTGT
TTTAAAAAAAAGATATGTCACAAAATGAAAATATATGCCGATTACCCGTCCACCTCGCAC
GGTTAACGCACTTCTGTTGAAATCTTGTTGCCCTTGTTCCGCCATTTTCCATACAAGTCA
CTATATAATGAAGGAAATTATCATAAAACAATAAGAGTGATAATACTTCAGTTAGACAAT
GGAGTCATTATTATTACAATAATTATACACAAGAGAGGATCAGTACCGTGGCTCGTTGGT
CTAGGGGTATGATTCTCGCTTAGGGTGCGAGAGGTCCCGGGTTCAAATCCCGGACGAGCC
CAATTTTTTTTCTTTCTCAAAATTATAAAAATACTTATCTATACAACATACAATATCAAA
TAATGAATGGTTACAAACAATTTTTGTGAAATTAATATATTCCAACTAAAGATTGTGATT
ATTTTATAAATCATTGCTTTCGCTTATTATACATGTATAATTGCATGAAGTTTTTATTTT
TTAATGTCGTTATA
>LTR_comp800_g1_i1
TCGATGGATCGGAAGGTTCGTTTGAAACTTGGACGAGGCAACTCCGACTTCTACGAGACG
TCTACGGCTTGCGAGAGGATGCGTGTCGCATTCTCATTGTGTCGAGACTCCGAGGGAAGG
CACCAGATTGGTTTCATTTCCGCTCTGAGCACATGGCAATGACGATCGAGAACTTTTTGG
AGCAAATGGGCTCCATGTTCGACCAACGATCAAACCGATTGATGGCAAGACGACGGTTTG
AGGAGGGGACATGGCACCGAGTGGTAACGATGAAAATTATATTAAAAGACGACGAACCGG
TGTACCAACGGGCGAGACGGCTTGCTCCCTCTAAGAGAGAAGAGGTCAACTGGCAAATCG
GAGAATGGATACGCGACGGCATTGTGCAACCCTCTCTGTCGGAGTATGCAAGAAGAAAGA
CGGTACTGCGCGCTTATGCGTTGATTATCGGCGACTGAACGCGAAGATAGTACGTGACCG
ATACCCGCTTCCACTAATCGAGGACCAATTAGATCTCTTGCGAGATGCCGTAGTATACAG
TAAATTAGATTTGCGCAATGCATTTTTCCACGTAAAAGTAGAGCCCGAAAATAGAAAATA
CACGTCGTTCATAGTGCCCGACGGGCAATACGAATTTTTGAAAGTTCCGTTCGGTCTGTC
CAATTCTCCCGCCGTTTTCCAGCGTTATGTGCATGCAGCGTTTAGGGATCTCGTGGCGCA
GAAAATTGTGATCTTGTACGTTGACGACCTGATTGTTCCCGCGAAAGATTATGAAACCGG
CGCGCGGCGTGTAAGGGGGCCGCCCTTAAACGGGCGGCTGAATTCGAATTGATGATAAAT
TGGGCGAAGTGCGAATTTCTCAAGATACGCGTGGAGTACCTCGGGAATATAGTGGAAGGA
GACACGGTTCGTCCCTCGAAGAATAAGATGAAAGTGGTGGCTCGTTTTCCGACCCCAACG
ACCGTGAAACAAGTGCAAATTTTCTTTGGGCTGTCCGAATACTTTCAGAAATTAATCCAG
GATTATTCCACGATAGATCGGAAGAGCGTCG
>LTR_comp855_g1_i1
ATAAATATTATTTGGCAATGCGTTAAGTAGAGACACCCAGTGCAGTGACATGAATCATAT
GATCGGTTGTGGATAGATCGTTAACACTAAGATCGTGTACTTTTGATGCACAGCACGGAA
GAGCAGATTCTTTTGACTCACGCATAATTCTAATTGTTGAATTACTCTTAACGAATACCT
TATTGTCTGTTAAACAATAAATCCGATCAACATTAATATTGTCAGTTACATACACTAGGA
TAGAGCAAGTTTGTATATGTATATATACGTATATATATGTATACAGAGGCGCGTTCATGC
ACACAACCCACTCGTACCAAACACGTGTCCGTGACAAATTACGAAGAAGTGTAAATACAA
CGAAGGAAAAAAGGGTTCAACAATTGGGTAAATTTACAAAGAATTTTCGAAAAAGTTTAT
TTCAACTGGACGAAT
>LTR_comp883_g1_i1
TCGTGACAATCGGAGTACTTTACATTTGGTCCTTCGAGCCGGATTCATCGGTCAGCGAAG
TAGAAGCCACAGTCAACGAAATCAGTACTGTCGAAGCCGTTCGTATCATCAAGCAGTTCA
GCGGCTGGTGATTTAGAAGAAGAAGCTGGTAGTACCTTCAATCGTTATCAGACGTTCAGC
GATTTCATTATTTGAATTCATCAGTTAAGGGAGTCGCGGCCCGCGTTATTCAATCATTAG
GCATATCAGAGGCAAATTACAATCTCGCGTGGGAACTGTTAAGGTCTCGATATGAGAATT
TCACCAACCTCAAAAGACATCACGTAAATTCAATAATAGATTTGAAACCTGCCCACAAGC
AGACGGAAGTAGCGTTGCGCGAATTTATCGATGACATTACCAGCCATCGAAATGCATTAC
GG
>LTR_comp937_g1_i1
ATTCCTCGTTCGACCAGAGGATCGGGCTTATCAACGCATTTTGTGGAGAGATAATGGTTG
CATAAGAACGTACGAGATGAATGTGGTCACGTTCGGACTATCATCGGCTCCATATCTCGC
CATCAGATGCGTTCATCAATTGGCAGACGATGAGGGCGACGCATATCCGGAAGCAGCAGA
GATCATCAAACGAGATCTGTACGTCGATGATCTCCTCACGGGCGCCGACACAATGGAGGA
AGCGCGGCACATCCAACATCAAATCGGCG
>LTR_comp951_g1_i1
CCTGTCCTCGCAGGAGTATGTAACAAATTTAAGCGATAATTAGCAATCGATACATTTAAT
TACTCGTTTCTACAAGACGAGTCTTGTCGAATCATTTTCCACTATTCCCTAAACTATAAC
TCTTCAACAACGAACGACGTCATATTGCCCTCGAGCTCCCACATCTACGACACAAAACTA
AAATCGAATCACTTCGTTATTCAAACACCAAAAGATCAGTACATAAATCCATCTCTTAGA
CACACAATTCAATCTCCTCTACCGAAGGTTTCAAATACTTCGAAAAATCCCCGTCCGCAA
AGGATTAACG
>LTR_comp1093_g1_i1
GCTGGTTCGCACTGTCACCACACGAATGATCCCGTCTGCGCCAGGATGAATTGCTGTGAC
TCGTCCTAACGGCCACTGCATTGGCGGTGTGCCGTCTTCTTGAACCATGACCAATGTTTC
CACTGGCAGATGCTGGACCTTGCTGGAATGCCATCTTTTTGCGGGTGATGAGCTCCTGCA
AATATTCTGTTCGCCAGTGCTTCCGAAAGTGTTGGCGCATTTTCTGAATGTGTTGCCATG
ACGAAAGTCGTCCGTCAGGCAAGTCGGTCATATCGTGGTCAGGCACGCTCATCAAAGACC
CGCTAATTGAGAAATGACCTGGAGTAATTACGGTTAGATGGTTTGGATCGGATGAGATCG
GAGTCAGTGGACGGGACTACAATATGGCTTCGATTTGGTTAGTAAGGGTGAGACGGCCTT
CGAAAGATAATAACGTGTCCCCGATTACGCGTGTCATATGGTGTTTTGCGGATTTTACTG
CCGCTTCCCGTATACTACCAAAGTGTGGCGATTTCGGAGGAATGAAATGCCAATTGATAT
TTTGATCGGCGAGTGATTGCGTTATTAGCGTATTATTGGC
>LTR_comp1121_g1_i1
CTGAAGCAATTACTTGAATATGCATCCTAATATTCTATTTCTAAACCTTTAATTTCTAAC
TTCGAGTTTCCAAGATCCGAACGATCGAACATCAATTTTCCCAGGAAGAATAAAATAAAC
TGTAAAGCAAATGTCCGCGAACCTAGCATTAATTCTTATTCCAAGAAAGTACATGACCTT
CTTTCGTTGCCCAACATTTCCACAGCAAGATAGAGTCATATTATTCGAAGGGAATCGGAC
TGCACGGGATCTTTCTTGGAAGGAAGTCTGTCTACTCCATCGATATCCTCCACGTAAATT
TTCCATGGACCCGGGGGTGGTCCGGCTGCTTCATAAATTCTTCCCCTTCCTTCCTGCCCC
CCTCTCTTTCGCCCCTGTTCCTTCGAATCTTTCAGAATTTCACGCAAATTCATCCGTTCA
TAGAATAACGAAGGAACCGACGGATCTGATCAGTATGCAATACTCGCTGCAGTTGTTCGA
GAGGCTCACCGGCGAGATTCCGAGGGAGGAGAAGGAATTCCCGAAGATCCAGGAGCAATA
CCAGACTTTGGGTAAACCTTTAAACGCTTCCACTGTCTGGCGTAAAGCTCTCATAGGGGC
TCGATCACCCGTGAG
>LTR_comp1149_g1_i1
CAATGACTAGTTTAAACAGAACAAATTACTAGAGGCGATGAAGACTGAGTATGATGCTTT
AATGGAAAATAAAATGTGGGCTTTAGTGGACAGGTCTAAAGGTGAAAAACTTTTAAAATG
TAAATGGTTTTATAAAATTAAAATGCACCAAGATGGTTCTATTGATAAATTTAAGGCTAG
GTTATTCGCAAGAGGCGATTAACAGCGTGAAGCTAGACATTTTAATGAAGTATTTGCGCC
AGAGGGAAGTCCGATTATCCTCCAAGTTCCTGCCACGAAGGCTTACCAAGGA
>LTR_comp1149_g1_i2
TGAAACAAATGTACAGGAGCCAATTGCAGATGAAACTCCATGTACAAGTAGAGGGCCAGG
ACGTCCTAAATTTGAAAGAACTGGAAATCGAGGAAGACCAGGCAAGATTTATCAGGAGAA
GAAGTTGGTTCAGGGGGAGTCAAACGAAGAAATTTGTGTGAACTCGACTCAGGAGGAACT
GAATTAAGTTGAACCAACTACTATATGCGAAGCAATGAACAGTCCGAACAGGAAGAAATG
ACTAGAGGCGATGAAAACTGAATATAATGCTTTGATAGAAAACGACACGTGGACTTTAGT
GGAGAGGCCTAAAGGTGAAAAACTTTTAAAATGTAAATGGTTTTATAAAATTAAAATGCA
CCAAGATGGTTCTATTGATAAATTTAAGGCTAGGTTATTCGCAAGAGGCGATTAACAGCG
TGAAGCTAGACATTTTAATGAAGTATTTGCGCCAGAGGGAAGTCCGATTATCCTCCAAGT
TCCTGCCACGAAGGCTTACCAAGGA
>LTR_comp1211_g1_i1
CCAATGTTGTCGTCTGGTCGATCCGCCGCTGGTTTCGTACATCGACTAGGAGTCCAAAAT
GTAACAGGAAGTCCGCTCCGATGATGGGTCGGGAGTCTTCGGCGATTACGAGTCTCCACG
GAAATACGTACAGGTCAGCTCCTGTGTTGACCAAAAATTGCGTACCCAAGCTCCGATCAA
ACACAAAGAGACGGCGGAACATCGGGCTGGTGTCGCTAGCCGCCGTCAGCGAATGCCCTA
AATGTTTTCCGACAGCGGTTTGTAGGAAAATGGCGGAAAACACCGACGCGCATTTGATCT
GAAGGAATGATAGTCGTGTTCCAAAAATCACAGGTAATTCGTTTTTTATTGAAATCATAA
CGTTAGCGCTTGGTCGAGGTGTTGTACACGAAGAAGAGTAGCGCGCTTTCGATCGCGTTT
ATATACAAGCGCTCAGCCGAACATTCTCTAAGTTACATATTTTAAACGACGTCATTTTAC
CCGTCAGTTGTTTAACTGCTAGCTTAATGACCGCAAGTGAAGTGCCTATCCTAGCGCGTG
TTAATGTCCTTGCGGCGTCGCGAGTTTGTTCACGCGGCTTACTTGTATTTGTTTGCCTTT
TCATTGTCAGCTGTTTAGCTGACAGGTTAACGACACTACAATCCCTTTGTACTCGAGGGG
CGCCGTAAGTCGCCACCAGATTCAACGCAGCAAACTTTCAAA
>LTR_comp1232_g2_i1
AATTTTTATAGAGATTACATGTCAGTCGTATTAAATGCACGGTAGTTCCACTGTTAAGTA
AACGTCCATTGGAAAGATTGTCCGAGTGTTGGATTGACAAAACGTTGCAATTAGTATCGA
AGGACGTAGAAAGATAGTTAGGTATTTTATCGAAGATATTAATTTCATGTACTGTCTTCG
TTTATTTACGAAACTTGGAACGGTAGAGTTCAGAACGATTGGAGAAAGTGATCGCTAATT
TGATATCGTTGAGGGAAGGACTCGAGCAGTCAATGATAAATCACCTGGAATTGCTAATGC
AGGTTGAAAACGATTTCTTACTTTTCGCGCCGTGAATATTCAATATGCTTTCCCGAACGT
GATATTTTCGATTTTGAGTAAATGGAGACGTCTTTTCAACATCGCTGACGTTCGATGGTC
AGAATTCCATTATTATGCTCTTCGAATATTTCGTGTTTACTGCTTCAGGTATTTTTATTG
C
>LTR_comp1240_g1_i2
ATTTAACGTAATTATCCATGAAACATTAAATTAAAATAGTTCTACCCCTTAATTACTATA
TCATTGCCATAAATATTAATTCCCAAACATATTGATATTTCATTAGAAAATGAATGCATG
AACCGTTCATTTTAAAACTGACCCAAGTCCATTTTTTAAAGAATCAAGTTAATCATTGCA
ATAGTTACAATTCCACACAATCTGTATATTCTGTAAAGTTAATCACTATAATAGTTACAA
TTCCACACAGTCTGTATATTCTCTAATGCTTCCAGTTTCAAAATGAACGGTTCA
>LTR_comp1261_g1_i1
GGTCTTCTATGTCTGATCCGTATATAACAAGGTCGTCAAGATAAACAAAGCATTGCTTGT
TAGTTAATCCTGTCAAAACTGCGTTCATCATTCTTTGGAAACACGCTGGACCATTTTTCA
AACCAAATGGCATACGAGTAAATTCGTAATGCCCATCTGGCGTGGAGAAGGCTGTTTTAG
GCGAATCTTCAGTATTCATAGGGATCTGATGAAACCCGTTTGCAAGATCTAATGTTGTAA
AATAATGGGCGTGCCCTAATTGATCCAAAATGTCTTCAACGTTTGGCAGTGGATATGCAT
CACCAATAGTTTTGTCGTTTAATTTGCGATAGTCTATGACTATTCTCCATTTCTTTATTC
CTGAAGCATCAGGTTTTTTGGGGACTACCCATAGTGGGCTAGACCATGGGCTAGTAGATG
GTTTTATAATTCCTTGTGCTAACATTTTTTCTATATGTTTCGAAACTTCATTTTTGTGGA
TTTCAGGATAGCGATATGATTTTACATGAATAGGTATGTTATCATGAGTAGGGATTCTAT
GTGTCATAGCAGTGGTTGTAGTTAAGGTATCATTGGGGAGAAAAAATATATCTTCAAATT
CCTCACATAATTTTTGGACTGATACTTTTTCTTCTTCATTAAGGTGATTGAGACGAAGAT
TTTCATTTAGTAATTCGATGCGATTTGATTTATTATTTATGCTTTCCTCAAGTACTTTGA
AAATTTGGACCTTTTGGGGTAAAGGTTCGATCATAATAGAAGGTTTAGGGAAGGATAGTT
TTTCCACTGATCTATTCACGATTGTAATAAGAGCTTCATTGCCAGTCGTAAC
>LTR_comp1420_g1_i1
GGTAAACACATGAGCGGGTCTATCAAGACGCTGCACTTTGATTACGGGCACATCATTCCA
GTGATTCACACGAAACATGGAAGACAAAGTAGCGAGAGCATCAGCCATCTGGTTTTCATC
CCGAGGGATGTGGTGCAGCTCGACCTTTGTAAAGTATGTCAACAGACGTCTTGCATAGTC
ACGGTATGGGATCAGCTTCTCATGATGAGTCTCCCATTCACCCTTTATCTGATTAATAAC
AAGTGCAGAATCTCCATAGATGTCAAGGTGCTTAATTCTCAGATCGAGGGCTTCTTCAAT
GCCCAAGATGCATGCTTCATATTCAGCTATGTTGTTTGTGCATTCAAAAGTTATTCGAGC
AGTAAAAGGAATGAGATCGGAAGAGCACAC
>LTR_comp1486_g1_i1
CTCTCTCTCTCTCTCTCTTTCTATAGATATATATATGTGTCTCTATCTCTCTCGCTCGTT
TTCTATTTCTTTCTTTCCCCTTTCTTATTATTTCGCTTTTCTTTTTCTCTTGTCTGTCGA
GACAGGTGAGCGGAAAATGAACGAGACGCCCGAGAAAGAAACCATCTCAAATTGACCCCC
TTCGTTCGATCCGCGTTTTTGCTCATCACTCGACCCCTTAACACTCTTTGTCGATCG
>LTR_comp1738_g1_i1
GCTGATAGTAATTCGATAAATACAATTGAGAGTTTGCTGCTAGCTGCATACACCTTATAA
TAGTTCAAACTTATAACTTAGAATGGAATCGCGATAGCGTCTTTGATAAGGTGGAGGATT
GTTTCCTTTCGTCACTCTTAATCTAATGGTAGTGGTGCGAGTTTTTTAACACTTCGCTTA
TATGTCCCTAATGGTGTTTTTACTGTCACTACACGGGTCACATTGTCTTCCCCCGGATGT
AGCTCTATCACTCTGCCTAACCTCCATTGCAGAGGGGGTAGATTGTCCTCCTTTATGAGG
ACTAGCCTATCCTTGGTGAGATGTGTGGTGTCTCCAAGATGCCATTTGCGCCTGGTGTGT
AGCTCGTGGAGATATTCTCTGTGCCATCGGGCCCAGAAATGTTGGTTAACCTTCTGGGCG
TGCTGCCATAGTGACAGTCTGTTGTTTTGTGTATCGGTCCACTCGTACTCCGGTAGTGAT
TGTAGTGAACCACCAATTAAGAAATGCGCAGGG
>LTR_comp1775_g1_i1
GATGAATTTGTCTTTGCGTTACTCTTTCCCTCACCATTGATTTCAACAAGTCCCACCTGG
TTCGGAATTTCCTACTACATTGTAGCTCCGCAGGTGACACTCCGGTAGTGCAATGAGGAG
AAGAGCGATAATGAAATAAATACTTCATAAGAGAGTCGCGTCTATCATTTTTGGCCAGAA
GTAATTTAAATTTTGTTTTAAACGTTTTCACTGAATTTTCTGCCGCCCCATTGGTTGCGG
GGTGATACGGAGCAGTTTTGATATGACGAATCCCGTTCTTTCTCACAAATTCCGAAAATA
ATTCTGACGTAAATATAGGATCATTATCGGTCACTAATTTGAAAGGTATTCCCCATGTGC
AAAAATATTCTTATTTACATGGACCCATTTTGAAAATGCATCAACAATAATAAGATACAT
CCTGCCCTTAATAGGACCTAAAAAGTCTGCATGTATGCAATGGTTTGGCCCGTCAGGCCA
GTCCCAAGTATGCAAAACTGATCGTGGCGGATTATCCGCGTTTTCCAAACAAAATTCGCA
CGTCTTCGACACATTTTTAATATCTTGGTCAATTTTTGGCCA
>LTR_comp1781_g1_i2
GTTTACTCGGTTAGACTTTTCGAATGGTTCGCTGGGTTCGGCTGATGCTCTTTTTGTTTC
CGGGCCTGTCGGTTCCGCTAGGCAGTCACTTTGCTGTAGGATGGACCGGAATGTATTTAT
TTTTGTCAATTCCTAGGTGGTTCGATTCTTTCGAGCGCAAGTCGGGTAATCTCGGGTTTA
GACGTCGAGACGATAAACGCAATGCACCGCGAATAGGGTTAATGCCTGTAATAATTCATT
TTCATATCTGGAAGCATGATCTTACTTCCATTTTTACGTAGCGTTCGGAGGTCGCTAGTT
CAAATAATACTCGTATCACAGAGCAGACATCGGACGGCTGTGATGAAAGTGCAGAGTATA
GCTTTCAGTAGTATGAGCTTGTCACTGGTCAGACTGAAGAGATATGCTTTTTACTCGATG
AGTGAAACGGTAACAATTGGATATTCGTTAGAATGGAGAAATATACTTCTAGATGTACAA
ATAATAATTCAGTTGATTCTTCGCGGAAACTATGTACAGTTATTTTCTCTACTGTCACGA
ATCGAAATGCTTCTTATGCGATTAATGCATCGATTCCCTGAATGTCTTAGAAAAATAGCG
CGGCGGTCCGAATGTTCGACGTTGCCA
>LTR_comp1786_g1_i1
GACAGGAACGTTTTGTAACAGCGTGTATGCGTCCTAATTCGGGTACCATGATAAGCCGCT
GGCCAGACCCCGCCATTCCACCTCAAACACTCGGCCGTTAACGCCAGAGTCATAAATCCA
GGGCGGGTGTAACTGTTACAACTCTTTCGGAGATCGCACATCTCGCTTTCTTCACGGCGG
AACAGTTCTAATTCACTCTAGAAAATTTGAGGTAAATCGGATACTTCTCATTTTTCAGTT
TTTTGCTTACAGAACGAAAATTTTCATTTTGTTTATATTTTTATTACTGATATAGGAATG
ATCCCGGACGAGCCCCCAATATTATAGGAACTAT
>LTR_comp1786_g1_i2
CGAAGGTTTTTAAGATTTTTAATCATTTTTTTTACTTATATTGAAGCCGAATTTTTATTA
TTCAATTTTAACTATTACTTTCTCGTCGCAGAATTTGACCCAAATCCGATTTTCTCATTT
TTCAGTTTTTTGCTTACAGAACGAAAATTTTCATTTTGTTTATATTTTTATTACTGATAT
AGGAATGATCCCGGACGAGCCCCCAATATTATAGGAACTAT
>LTR_comp1792_g2_i1
TTTTTTCAATGACAATGGATACTTTGCCTTTCGATTCAAACGTCATATAAACAGAGAAAC
GGAATTAATATGCACGAAATTGTTATGTTTCAAATGAAAATCACTTTGTATAGCAGAGGC
TGCTCAGCAGCAGATTGGTAATCAATTGTTGTTACGCGAATAGTTGAATTTTGAGGTTTC
GTCCGCAGGCGACCGCACTGTGCGACGAAAGGATCGAAATGCGATCGGGGCGAGGTCGAG
CGTCTCCACTTCGACAACAGGGGTTGCCTATTTCCGGCGTCGGCGTCGAGGGTGCTTTAA
AGGACAC
>LTR_comp1827_g1_i1
GAACATTACCAAGTCGAGCGGAATGCCTACTGAGATCACGGCACCTACTATTTTATCAGC
ACTACCTGTAACCTGCAAGCTACGACGGCTTGCACCGGATCGGTTGAAAATTGCCATAAA
GGAGTTCGCGAACATGGTACGTCTTGGTATCGCGTGACCAGCCGAAAGTAGTTGGTCTTC
ACCCTTACATTTAGTTCCAAAAAAAGTGAGGGGTTAAAAGAGAAAGGCGATGGTAAATAA
AACCAATCTCGCAAATTCTTTTTCACACCTCGTTTTATTTTCGTCGGGGAAGAATTGCTC
TATTTCCATGCGTAAACGAAACCTCGGACAATATGCGGCGTAGATAGAGGTTCGGACGCA
CGTTCGAGCTAATGCTTAGTTCTGACTGCCTCGCGTTCCACCGGTCTTCCGGGTTATATC
CTCCTATCCTTAAACAAGGACAGCAAGCAAGCCATGCTGACGAAAAAACGCGGGAGGAAA
AACGCATGTAAAAAAAAGCGTCAAAATCCCGGTGAAAGTGCCCGTGTGGCTGGCCGGAAA
AATTCTGACTCATGCGAATCTGGCTGCCAGATGCGTAAATTGACCGTAGCCAGACTCGGA
CAGGCCTTGGCAGGATGCGAGAAAGCGTACTCCGAA
>LTR_comp1827_g1_i2
GAACATTACCAAGTCGAGCGGAATGCCTACTGAGATCACGGCACCTACTATTTTATCAGC
ACTACCTGTAACCTGCAAGCTACGACGGCTTGCACCGGATCGGTTGAAAATTGCCATAAA
GGAGTTCGCGAACATGGTACGTCTTGGTATCGCGTGACCAGCCGAAAGTAGTTGGTCTTC
ACCCTTACATTTAGTTCCAAAAAAAGTGAGGGGTTAAAAGAGAAAGGCGATGGTAAATAA
AACCAATCTCGCAAATTCTTTTTCACACCTCGTTTTATTTTCGTCGGGGAAGGATTGCCC
TATTTCTAGCAGCGTAGCGTCCTGCCAATGCTTAGACCTGACTGCCTTGCGTTCCACCGG
TCTTCCGGGTTACATCCTCCTGTCCTTAGACTAGGACAGAAAGCAAGCCACGCTGACGAA
AAAAACGCGGGAGGAAAAACGCGCGTAAAAAAAGGGCGACAAAATCCCGATGAAAGTGAA
CGCGTGGCTAGCCGGAAAAACCCTGACTCGTGCGAATCTGGTTGCCAGATGTGTGAAATG
ACCGTGGCAAGACTCGCGCAAGCCTTGACAGGACGCGAGAAAATGTGTAAAATTGCATCG
TTACAGAATTAACAATTATTAATTATTATGAATATACAGAATGCTTAGTGGAT
>LTR_comp1827_g2_i1
ATGTACAAAATAAATTGCCTCGCTACAGCTCAATAACTTTAACATTTTCTGAAACATATC
TGGTACCTTCATAAATCCCTCTTCATATAACGATGCATTTAAGTACGCTTTGACTGTGTC
AAATTGTCTGACCTTCATCCCTAAATGTACAGACAATGCAAGCAAAATTCGGATTGACTC
CAGTCTGGCTACACATATCACTGACTGTACCCCTTGCCGCAATTCTTGCCTTTCTTTTGT
CGATGCTTCCATCA
>LTR_comp1834_g1_i1
CTTCGACCCAGCTTGTTTACCTACGACCTTCGTAGGCTTTCCATTGAAGACCTCAGCCCT
TAACCAGAAGTCTTTGACCAAGTTCACATAAGTTGGCCCATTCAGCATCTCGAAGTACTC
AGATAGCTTCTGAGTATCTACCAAACCTTTCATGTCCACATCGTACTTCTTAAGTGAAGC
AAAATCTACTGGTGATTCTATTTGGACAATCAGAGAGTTGATTGGGATAGTCATAGTCTT
TTCTTTGTAAACTGACCCAGATTCTGATGCGCCTTTCATGCTTAAAGTAGATTCTGAAAC
TTTTGAGCTTGATGATGCCATTTGATGATTGACGAAGATTTGAAGAAGATGAAGATTTTA
GGGTTCTAAGGTTGAGAGAATGCGCTTACTTCGCAAGAGGTTTGAGAGCAAATGTGTTTG
TTGTGAGTGAGTAGTGTGTGAATTGACAAAGTGTTAAAAGTAAAAACGATTGCAATTCAA
AAGAGACAAACAAACATAACATTAATGACAAAATTGGGGGCGCGTGAAAAGTACTTTCAA
AGCTATTAAATCATCATTGCCCTTTTAGTTATACACCAACACATACAGGCCACGTAAGAA
GTTCACAGAGTAACTACCAAGTTAGTGGGCCAGAAGTTACTTTTTAAAAGGTAACTTCCA
ACGTTTCCACTAATTCAACTATTCAGAAGCAACAAATCCAGCTTCTGGACTTCAGATGCT
GACGTCATCATCAGAAGCGAGTTTTCCTCAGAACCTCAATAAAGAGCTTCTGATGGACTA
CCGCTTCTGAACTAACTTCAGAACCTAAAATCCTATTCAGGAGCAAGCAAGCATTTAATC
AGATACAAAGTGCATGTTCAAATTTTTCTTTATAAAATCAAATCTTTCAACAGTTAAAGG
CTTAGTAAATATATCAGCCCATTGATTTTCAGTATCAATGAATTGTATATCTAAAATTCC
TTTTTGAACATAATCTCTG
>LTR_comp1834_g1_i2
GTTGGCCCATTTAGCATCTTGAAGTATCCGGACAGTTTCTGAGTTTCTACATAACCTTCC
ATGTCCACTTCGTACTTCTTGAGTGAAGTGAAGTCCACTGGCGATTCTACTTGGACGATT
AAGGATTTCCATGGAATATCCATAGTCTTTTCTTTGTAGACTGACCCAGATTCTGTTGCG
CCTTGCTTGCTTGAAGTAGATTCTGAAACTTTAGAACTTGATGATGCCATTTGATGATGA
TTGAAGAAGATTTAGAGAATTTAGGGTTCTAAGGTTTTTGCGCTTACTTCGCAAGAGGTT
TGAGAGCAAATGTGTTTGTTGTGAGTGAGTAGTGTGTGAATTGACAAAGTGTTAAAAGTA
AAAACGATTGCAATTCAAAAGAGACAAACAAACATAACATTAATGACAAAATTGGGGGCG
CGTGAAAAGTACTTTCAAAGCTATTAAATCATCATTGCCCTTTTAGTTATACACCAACAC
ATACAGGCCACGTAAGAAGTTCACAGAGTAACTACCAAGTTAGTGGGCCAGAAGTTACTT
TTTAAAAGGTAACTTCCAACGTTTCCACTAATTCAACTATTCAGAAGCAACAAATCCAGC
TTCTGGACTTCAGATGCTGACGTCATCATCAGAAGCGAGTTTTCCTCAGAACCTCAATAA
AGAGCTTCTGATGGACTACCGCTTCTGAACTAACTTCAGAACCTAAAATCCTATTCAGGA
GCAAGCAAACATTTAATCAGACACGAAGTGCATGTTCAAATTTTTCTTTATAAAATCAAA
TCTTTCAACAGTTAAAGGCTTAGTAAATATATCAGCCCATTGATTTTCAGTATCAATGAA
TTGTATATCTAAAATTCCTTTTTGAACATAATCTCTG
>LTR_comp1884_g1_i1
GTAAGAAGGCAGGTGTGAACGTGGTGTGTAGATGCGCAAGTGTGAACGTAGTGTGAACGT
AATGAGAACATTTGCAAGTATGAACACAGAGTGAAAATGACTGATGGACCACGACGTGCT
GCATTGACTCTCGAAAGTGGCAAATTCGAAGGGGAAGTGTTCCAAAAAGAAATTGCGAGA
AAGGCTTGGAATGTAAAAGAATGTTCGAGAAGGTTCGGTTAAGATCAGCTTCCGGTTCAG
AAGTGTTAAAAGATCGAGCGGCACGTCCTTGACATCAGTCAATTATAGAATGCCGATGTA
GCCGCGTCCATTATACTCATAAAACCCTTACAGAATTGATTTTTTTTCGATTCTTTGGCC
GTGCTACTACATCCTACACTTGATGCTTGATTATGGAATTCATCTCTTCATTCATCGCCT
CTTTCCAATTTTCCTAATTCTTCGATTTTCTTGTTTGTCTTACATTCTTTGGTATTTATT
TATCCATTATCACCATTGTAATTTCTCTATTTCTTATCCTATCAGATCTTCTTACTCCGG
AACTTGCAACCTTTCTGTCTTCTTTTCCAAGAAAGCTATGTATTTTCATTACTTCATTTG
TAGTACCTTTTGGTTGTTCTCTATTTCTCCTTTAAATGGGTCCTTCTTGTATTCCTGATT
CACCTTTTTCATCGTCATCATCGCTTTATCTAGTACCTTCATCAGGAAGTGCCCTCATAA
TAGCATTCTCATATAGACTATTATTTTCATCGACTATTT
>LTR_comp1884_g1_i2
GATCGGAAGAGCACACGCTACATCCTACACTTGATGCTTGATTATGGAATTCATCTCTTC
ATTCATCGCCTCTTTCCAATTTTCCTAATTCTTCGATTTTCTTGTTTGTCTTACATTCTT
TGGTATTTATTTATCCATTATCACCATTGTAATTTCTCTATTTCTTATCCTATCAGATCT
TCTTACTCCGGAACTTGCAACCTTTCTGTCTTCTTTTCCAAGAAAGCTATGTATTTTCAT
TACTTCATTTGTAGTACCTTTTGGTTGTTCTCTATTTCTCCTTTAAATGGGTCCTTCTTG
TATTCCTGATTCACCTTTTTCATCGTCATCATCGCTTTATCTAGTACCTTCATCAGGAAG
TGCCCTCATAATAGCATTCTCATATAGACTATTATTTTCATCGACTATTT
>LTR_comp1888_g1_i1
GGATTTCTGAAGAGTGTTTTGACATAAGGGTATAGGAAGTGGTATATTTCTTAGCGACAT
GGTCATTTTTAAGTAATCAATTGCTGCTTTGTGAGTTTTTAGGAAGTCGTGACCTACCAA
GCCATCGAAAGGGATGTTATTGGGGGAATCAATTACTTGGAATTTTCCACAAATTTTCCT
GCCCTTAATGTTTAAAGAAAGTTCGGTTTCTCCCAGAGTTTGAATAGAAACGTTTGGCGC
GATCCCGTTTAATATAGTAGAATTATCGTTATTAACATCATATCTAGATATACTGTGTGC
TTTGATTAGAGAAATGGCAGCACCCGTGTCAACAAGAAATTTTAGGAGTTTATCGGGGCT
GTTAGAATTGTCTGATTCGAAGAGTATGGCTAATTGGTCGTTATTAGGTAGGAACGAACT
CGAAGAATTTATCGTGTACTCATGAGATTGAATTCTGTCGTCGCTTCTTCCACCAAATTC
GGGGGTTTCGGTGGATAATATGCCTGACGAAAATTTCCAGTTTGAGAGTTTCCTGACACG
GTATTATGTAACTCGGTCGTATTCGGTATATCTATATGGGAAGTGAGTGGGTTTTGTTGT
TGATACCTAACATCTCGCGAGTGATTATTAAGAGAATTTGGATTCTGTTGGTAAGTACGA
AAATTGCTAGAATTTGGTTGGTTTCGATATGTGTAGGAATTATTAGGATTTGGTCGATGA
AGATATGAGTTATTAGAATTTGGATATTGTCGGTTTGTTTGAAAATTGTTAGGATTTGAC
TGGCGAGGAGATCCATTATTTTGTCTTGAATTGTTATATTCCCGCTTTCTACATTCTTCT
ATACTGTGGCCGAAATTTTTGCAATACCTACACTGTTTCATACTACTGGACGCGTTGTTC
CGGTTCGATTGAGTGAAGTTGATCGTTTTACTAGGGTGTGGTTTTTGTCTCCCTAAATAG
CAGTCGTTAGTATTGTGATTTGATTTATTACAAATTCTACAACGTTGAAAGTTATCGTAT
CTCATGCGTAACGCTTTCTCTTCTGCCAAAGCTGCCGTAAAAGCACTATTAATATTGGGG
AAGTCGCGGTATCT
>LTR_comp1959_g1_i1
AAATAATAGAAAGACAGTAGGAACCGAAACTACTATAAAAATGGTAAAGACAATCGATAT
TTCAGATTAAACGAACAAAACAATAGAATCACAGATACACGCTAGAAGTACCAAGCATTA
AATATAATTGATATATAATTCTTACAAAAATTGTAACTATAATTGTTCATTGTAGTATTC
AAGTGAAAGCTTTTTTCAAAATCATTTCGAATAGTCAATGCTTTTAAGATATCAATAGGG
ATTGAAATAGTGAAACATTTGGAATGCATCGAATCTTTTTTAATGCTAGATCTACCGAAC
ATTTAATACGACTGATATGCAATCCCTATAAAAA
>LTR_comp1970_g1_i1
TCATCCTTTCCTCGGTCTGTGTTGAATTTCGTAATCGAAATCTTACAGATACAAAGCCTA
ACGCGAAATTCTTGGGTTCATGTTTTGCTTGTTTAGTGTCAGCCAGAAGTTATCACAATC
AGTAATAATTCGGAAACGTATCCCGCTCAGATAAACTTTGAATCGTTTCAGCGCGTTCAC
AACCGCCGAACACTCCAGCTCGAAACTATGGTACTTTGCTTCCGTCGCGGACAATATCCA
AGTCGATGAGCCGTCGATCCGTAACCGAAACAGGATCCATACTCCCGTGTTTTTGG
>LTR_comp1970_g1_i2
TATCATCTGATGGTGAAAATTCAATGCACCGCAGACAATTAGAAATATACCTCTTAACCT
TTTGTCGCAGATTTGGAAACCAATACAATTTCACGAGATTACTAAGAACTTTATCTTGCC
CTACGTGCCCGAGATCGTCATGACATGTTCGGATAACGTTATCCTCCATCGATCGCGGTA
CATAGAATAACAGTTTCTTTGTTTTATCCTTCCGGTACACGAGTCCGTCACGAAGCTCAA
ATTGCTTTAATTCCCCTTTTTCTAATTTATTCCGAATCTTCCCTATCTCGGAATCTTTAT
TTTGACACACCGACAGTGTTTATTCGAAGGTATTGCCCTCAATTACTAACACGCTGTGAC
AACGGCTGAGCGCGTCCACATGGCCCATTCTTTTCCCTGGTCTATGTTGAATTTCATAAT
CGAAATCTTGGAGATACAAAGCCCAACGCGAAATTCTTGGGTTCACATTCTGCTCGCTTA
GTGTCAGCCGGAAGCTATCACAATCGGTAATAATTCGAAAACGTATCCCGCTCAGATAAA
CTTTGAATCGTTTCAGCGCGTTCACAACCGCCGAACACTCCAGCTCGAAACTATGGTACT
TTGCTTCCGTCGCGGACAATATCCAAGTCGATGAGCCGTCGATCCGTAACCGAAACAGGA
TCCATACTCCCGTGTTTTTGG
>LTR_comp2013_g1_i1
GTATGCGATGGTTTGTTTTTCAAACAAAATTCGCACGTCTTTGACACTTTTTCAATATCT
TGGTCAATTTTTGGCCACCAAATATATGACCTAGCTAATGCCTTCATTCGGACAATTCCC
ATGTGTGCGCTATGCAATTCCGCGAGTAACTCTTTTTGCAATGACTCGGGAATTACTATT
CTATGTCCCCACATAATACATTCATTTTCTAAATATAATTCTTTACTTTTTCACATGAAC
ACTCACTCTTTTTCAATTGTATTTTTAGTCCGTTGGACGCAACGTGATAAAAAATGTGCG
CTCCCATTATCCTTCCCCTGAATAAATCTGATTTCATAGTCGTACCCCGACAAAAATACG
CTCCAGCGTTATACACGTGACGCTGCCATTTGTGGCAATCCCTTTTTCTTCCCGAAAATG
AAAGTTAATGATCTGTGATCTGTTTCCAAAACAAAATGTCTTCCATAAACAAATTGATAG
AATGTTTTGACCCCGAAAATCAATCTTAATGCTTCCCGATCTAGCTGCAAATAATTTGTT
TCAGCTTTGGTTAAAGTACGCGAAGCGAAAACAATGGGGCGTT
>LTR_comp2013_g1_i2
TACAACTCTTTACTTTTTCGCCTGAAAGGCATGAGCGAATCTGGCACTTTGTTTGGCCAG
CCTCTTTGAATAAATTTCTTGACTCGACTCAAAATTGGATCCGTGTTTGTTTCCTCTTGT
ATGACTTCTACTGAAATAACTTTAATTCCGTTTGTAACAAAATTTAAATACGTAAAATCA
TTATCAGCTTCTTTTTTAACCGTATTTTTAGTCCGTTGGACGCAACGTGATAAAAAATGT
GCGCTCCCATTATCCTTCCCCTGAATAAATCTGATTTCATAGTCGTACCCCGACAAAAAT
ACGCTCCAGCGTTATACACGTGACGCTGCCATTTGTGGCAATCCCTTTTTCTTCCCGAAA
ATGAAAGTTAATGATCTGTGATCTGTTTCCAAAACAAAATGTCTTCCATAAACAAATTGA
TAGAATGTTTTGACCCCGAAAATCAATCTTAATGCTTCCCGATCTAGCTGCAAATAATTT
GTTTCAGCTTTGGTTAAAGTACGCGAAGCGAAAACAATGGGGCGTT
>LTR_comp2076_g1_i1
ACTTAGCAGAGCGTGGTTTCGATCCACGGACCTCTGGGTTATGGGCCCAGCACGCTTCCA
CTGCGCCACTCTGCTTCGTTGGGAACCTTTCCCAAATAATTTGTCACGTGATTAGGTGGA
AAATAATGAATTATTTATTCATTTATTCTTTGTAACACTGCATGCAATACATATTCTTAA
TTTAAAAGGTAATGTATGCAAACGCATATTATTGCTTTATTTTTCTTAATATATTAATCT
TCCTCGAATAAGAATGAAATCTTGAACTGAACCACGTGTCTTATGACGTTGTTTACAAAA
ATATTTAACCATTGAAACGTAATCAAGAAATGAAGGAAAGTTTCTCCTTATTCCATTAGA
AATTTCCTTATACCCTATTAGATAAAATATATACCTTCATTAAAAC
>LTR_comp2076_g2_i1
CACCACTAGCCCCGTTACAATGTGAGATCTGACTGTACCGAAGGGAAGAAATATTTTGTC
CTTGCGGATTACCGACTTTTGTAAAGATTCAAATAATTATTAGGAATTATTGTGAAGCGT
ATTTCAAAATTGTAAGTGAACGAAAAAAATAAAAGCGAAAAAAGAAATTCCCCCACTTAG
CAGAGCGTGGTTTCGATCCACGGACCTCTGGGTTATGGGCCCAGCACGCTTCCACTGCGC
CACTCTGCTTGTTGTATGTCTACTCCAAACATATATATAAATAGCATAGTAAAT
>LTR_comp2135_g1_i1
CCAAATTTTGAATTCCCTGTATATGAAGCTGAAGATGAGAATGATGATGAAGAGATACCG
TATGAGATCACTCGACTGCTTGAACAAGAAAGGAGAGCCATTCAGCCTCACCAGGAAGAG
ATTGAGCTTATCAACTTGGGTACTGAAGAGAACAAGCGAGAGATCAAGATTGGTGCTGCA
CTTGAGCCAGAAGTGAAAAAGAAGATTACTCAGCTTCTCCATGATTATCCAGATGTCTTT
GCATGGTCCTATGAAGATATGCCGGGTCTAGATCCCAAGATTGTGGAACATCGGATACCG
ACAAGACCTGAATGTCCTCCTGTCAAACAGAAATTGAGAAGGTCTCGTCCAGACATGGCT
CTTAAGATCAAGGCTGAAGTACAAAAACAAATTGATGCGGGTTTCCTCATGACAGCTGAA
TACCCTGAGTGGATTGCCAACATTGTACCAGTACCGAAGAAAGATGGGAAAGTTCGAATG
TGTGTTGATTACAGAGATTTGAACAAAGCCAGTCCAAAAGATAACTTCCCATTGCCTCAT
ATTGATGTGCTTGTTGACAGTACTGCTCAGTCTAAAGTGTTCTCTTTTATGGATGGTTTC
TCTGGCTATAACCAGATACGGATGTCACCTGAAGATAGAGAAAAGACGTCCTTCATCACT
CCGTGGGGAACGTTCTGTTATAAAGTGATGCTGTTTGGCT
>LTR_comp2154_g1_i1
TTCCCGGGTGAGACAATCCGTGTAAAGTATTGAAAACTCGTTTACGGAGATTTTTCGGTA
CGCACAGGCGAACGGTGGGAGTTGAAGTGTCACAGAAAATTTCTAACTCGTTTTTGTTAA
TCGGGAATTTAATTTTCTTTAATTGAAGGGCAGTCTCATACAGCAAGAAACTTTTAAGCT
CTTCATCTGTCTGCTGAGACTGAGCCATTTCCGATAGATCTACGGGTTGATTAATCTCTT
CTATTCTGGACAATGCGTCCGCAACAACATTTTCCTTTCCCGATATGTGCTGTATATCCG
TGGTAAATTGGCCTATGAAATCTAAATGCCTAAACTGTCGGGGAGTGGATCGCTTTGGCC
GCTGTTTAAAAGCGTACACCAGAGGTTTATGGTCTGTGTAAATTGTGAAGATGTGGCCTT
CCAAATTATGTTTAAAACGGCGGACCGCGGTGTAAGCTGCTAATAACTCTCTATCATAAG
CGCTATATTTTACCTGTGCTGATGAGAGACTTTTGGTGAAAAATGATAA
>LTR_comp2184_g1_i1
GTATTACCGTTGATATATAGTTCGCCCCGCGTATAAAACGAACGAACGTTACCATAAAAA
GTACTATTTCTCTCTTCGATAGAAACCCCCACGCGTGGATGATTTTATAAAAGTGTAACA
ATTATGAGGGAATATTTAAAGGAGATAATTTTTAGTGATCATCACTTTACACGTGCCTGA
GTGAGGAGGAATGAATATACTCTATGTTGTTGGTAAAATACTGTAGAATAAAATTCAAAT
TTTTCAATAATATTGTAAAGTATAATGTGCAAAATAAATTTAAAAAGTTGTAGAATGAAA
ATTAAGTGGATATCAAGTGCCTGGATAGCTCAGTCGGTAGAGCATTAGACTTTTAATCTA
AGGGTCCAGGGTTCGAGTCCCTGTTCGGGCGATTTTTTTTTCCTACTACAGACTTGTTCT
TCCACTCTTTTTCCTTCATTACAAATGTCCTACAATCTTTTTTTAAC
>LTR_comp2184_g1_i2
GTATTTATTTAGCCATTGTATTTCGGGGAGTGCAACAATTCTATATTTTTCATGATCGTA
AACATAATAGTTTCTAAGTATCGTAACGATAATGATCATCCTGCTGATTTTGAAATGCAA
CGAAAGACTACGTTTTCAATGCCTGGATAGCTCAGTCGGTAGAGCATCAGACTTTTAATC
TGAGGGTCCAGGGTTCGAGTCCCTGTTCGGGCGATTTTTTTTTCCTACTACAGACTTGTT
CTTCCACTCTTTTTCCTTCATTACAAATGTCCTACAATCTTTTTTTAAC
>LTR_comp2221_g2_i1
AACACTAGATTTACGGAACGAGTCGCTTTGACTCCTACTGTATTTTATAAACATTATTTG
CTGAATGTTTGTGTCGATTTTGATTAATGTGGGTACGCTAATATGAATCCTAATCGTCTA
CGTTTAAATCTCTACTTTCCGAAATCTAAACGAAGGAATGTCGATTTTTACAAAAACAGT
AGAACAAGCTGTACGATAAATGTCTGTAAATCTAATGTTAAGCTCGTTATAAAGCGTGAA
ACTTTTACCCTCGCTTTCCACTATTGACTTTGTCGTATTATATTTTTACCGTGTGCAACG
AATGGGAAAGTAAAAATACTCTCTTAGTTCGAAAACTTTATGCCTGGTACTCAAAATGTT
AAGAGATTGTTGGCAGACAAAAACTTACAAGTTAAAAGTTCCTGTTGCGCGGGAGATCTC
ACGTGATAGGTTTACCTAGACTGCTTAGGTATTAGAGGATGCCCGCTGACGAGGAATGGA
GTCGTAAAAGGGATAGGAATGGCGGAGGGACAAGTCTTGATCTGACCACACTGGATCGCT
GGGTGATTCTGTCCTTTATATTCTGATCCTCTTCTCTGTATTGAAGAAGTGTTTGAACGG
GGAGTGGTAGACTCGGAACCACCGAACGATGCATGGCATGGTTGCATTGTCGAGTATTTG
TTGCCCAGCTCTGGAGTGTTGGCACACTGTCGACAAGCTAAACAGTTAGACAGACAAGGG
GATTCCTTCACTTCTACGACACGTGGCCGTCACCGGCCGCGCGGTAGTAACAAAAAATGG
AAACGGAATAGTATACGACGAAGATGGAACGGTAGAGAAAAAAGTTAGTGTTAATACAAA
GGGTGCCCCGAAATTATGTTTCTGCATTTCATTTTATTAAAACAAAATTCTTGCAGAACA
GCGATCACGTGTCGAAGCTGAGCTGGCTCAAGCGTCGTGAATGAGAGTTCCCTTCCTGTT
GTGACTTTTGAGCTTGAATCGCTAATTGGAAGTCATTAAAATGAGGGGTGGCAGTTTGAC
ACCCCGGAATTTGGCAATAGAGTTAGAAATGGTAAGGCTAGCCTTTCTCGTACTGGAGGT
GCACGGGAGGGGCAGATTTTTTTACTTTGTGATTCTCAAAAATTCTATACACCCATGAAA
CCCATTCTATTTAAAATTGAAAAAACTTACGGTGCGATAATTTTAAACACTTTCAGTTTG
TACAGTAAACCGTGGAATTCAGGTTAGGAAAACTTTGTATATTTACACAATAAAAACGTG
GACAGGAGAGGAGCAAACCCCTTTTTTTCTCCATCCCAGCCCAGAAAATGGAGCCCCAAT
CATACCAATCTCTATTATCGTACCGAAACACGCGTGCATCGTGCATTGTACACGAGATGG
CAAACGAAGGAAATGCGAGTCTACTGATAAGTAAGTGTGATAAGTAAGTATCTAGAATAT
TTATTGTAGGGTGAATGGTTTGTTGTGCGTGCGTA
>LTR_comp2325_g1_i1
GACGCTCTTCCGATCTAACCAAAGGGTGTGGTTACTGCTGTTTTTTCTATGTCGGTTGAT
TCTATGGGAATTTGGTGATACGCTTTAACCAGGTCAACTTTTGAAAAAATGGTTTTGCCA
TGTAACAAGTTAGAAAAATCTTCTATGTGCGGTAAAGGGTAGCGGTCAGGTATGGTACGC
GCGTTTAGTGCTCGGAAATCCCCGCACGGTCTCCAACCTTTATCCTTTTTAGGGACTAAG
TGTAGTGGTGAAGCCCACGGGCTTTTCGAAGGTCTAATAATACCTTCTGCCAAAAGGTTT
TCAAATTCTTGTTTAACTATCTTTAAT
>LTR_comp2383_g2_i1
TTCCGATAACGCCGTTACGCCGAGCGGAAACTAAATTTCATTGAATCGGTTGCCACGCGT
TTGTAGTAAGCGCGTATCCGCGGACGGTGTTTATACCGGGGCAGAAGGCAGTTTTTAAAT
CGCGGCTGTGAGCTCGAGGGAAACGCGCCCGATCGGAATGGAAAGCGAGCAACGCTCGGG
CACGCGGCCTGCAGCGGCAGTGTTAATTCGCGCCCTGGGCGGCGCACGGATTGCCGGGTA
AATCTGCCACGCGATCGTTTCGCTTTGCTCCGCTGTTAACGATTGTTTTTACTCAAACTG
TCGTAAGAGATATCCACAAGCTGAAATTTAACATTATTATTTCTCATTGATTGAAAAGTA
TCTGACGAACGAAAGATAAACTTGGAATTATTGTTTCTTATTGATTGGAGAAACGTATTT
GTTTTCTAACTTGTTTGTTTCATTGATGTTCGTTAAAAATAAATAAAAGGTGAACTTGGA
ATTTTTATTTCTTATTGGTTAAG
>LTR_comp2406_g2_i1
TCGAGAAACCGTTCCGCCGCGATGATCGACAATCGATCCTCGACAAGGACAAAAGAGGAA
ACAGCGACGATCCGGCCCGTGTGTCGCAACTGTTCCTCTGCTTTTGTGCGCGCGCGCCAC
GTCCACAATGCGACGGAGGCTCGAGTGCAGTTCCTCCGCAGGAAATCCAAGTTCCTTCTC
TTGCCGAACTGTCACCGCGGAACGAAGGACGCGTGGATAAGCATCTGTACGAGCGGCTCA
CGAGGAACCTTTTATCGACGGTTCCAGGTAGCGACCGGCACACGAATCGAAACGATACGA
AGTTGCGCGGTACACGTTTTTGACAACTATGTTAACCCCTTGCACTACTATATCGTGTCA
GACGCCTGCTGAACATATAATAACTCTATGTAGTTAACACTAACCGTACCATGATTAATA
ATTAATTCAAAATTATAATTTAACACTGAAACTATCGAGCAGTTAGGCTGAATTTCTGGA
ATTCCTCTGTAGAAACTCTGAAAGTGCATCTATTGAGACTTTCATT
>LTR_comp2432_g1_i1
AGATCGGAAGAGCGTCGTGTACGTGCCCGCGATCGACGCGTGTTTCATTTGTTGTCCTCA
GAGATATTTTTGTAGCCGTCCTGCGATGGCAGTCTTTACGCGGATATGGTCCGAATAAAG
CGTGCTGCTGTAGACATTACAGTTGGCGACGAGGATATACAGTGAAATATTAGTGAATCG
GTGAACAAAGTGGGACCGAGGATCGTGATTCGGATAGCTCAGAGAAATAACGCAAATCAA
GAAATACCAAAAATGGCCACGACAATTGGCTCGATCAACGAGTACACTAGGAATGAAAAT
TGGAGAATGTAGTTCGAGAGGTTGGAACAGTATTTTTTGGCAAACGATGTCCAAAACGAG
AGAAAAGCAGCGCTTTTCCTAACATGGTTGGGGGTCGAGGGGTATTCAGTCCTGAGAAAT
TTGCG
>LTR_comp2729_g1_i1
GTGAATCACCAGACAAACCAATTAGGACGTTTCAATTAAACACAGTAACATACGGAACAA
CATCAGCTCCATTCTTAGCAGTACGTTGTTTGCAACAGTTAGCAGACAACGAACGCGACA
AATTCCCCATAGCAGTCGGAATTTTTAAAAGAGACTTTTACATGGACGACTTGATAACCG
GGGTTGAGACTCGCGAATTAGCTTTAAAATTAAGAAATCAAGCAATCGGGTTAGCAAGGC
TAGGAGGGTTTAATTTAAGACAGTGGACCTCAAATGATGAATTTTTAGTTAAGGGTTTAG
AATTAGGAAACCACGAGTGCACTATTTCATTAGACATAAACGAAACAAGAAAGGCATTAG
GTATTAGTTGGAAAACCCATACAGACGAAATTATGTATATCATAAAGACCACGGGAGATG
TTCGGCCGACCAAGCGTTCAATCTTATCGCAGATTGCGCAATTGTTCGATCCGTTAGGGT
TATTAGGGCCAGTAATAGTTCGCGCAAAAATAATTATGCAGGAACTGTGGAAGGCACATC
TAAGCTGGGATGAGTCTGTCCCTCAATCGCTGGAAACAATGTGGATAGACTTTAAGAGGG
AATTACCACAATTAAATGAGTTTGTAATACCTAGGGCAACGGTGCTCAAACACTCAGTGG
CAATACAACTGCTCGGATTCGCCGACGCTAGTGAGGCTGCATACGGTGCATGTCTCTATT
TACGCTCCGTTAATAAAGAAGGCAGATGTAACGCTAGCTTAGTATGCGCAAAATCTAGAA
TCACCCCTGTAAAAACCATTTCGTTACCGCGATTAGAATTATGTGCTGCTAAATTATTAG
CCGACCTGACCAAGGAGACCATCGAGGCCTTAAGCCATCTTAAAATAGAAAAGGTTTTAT
TATGGTCCGATTCGACGGTTACACTACACTGGATTAAGACACCACCGCACACTCTAAAAA
CATTTATCGCAAATCGGGTTAGTGAAATTCAAAGGCAGACCGAAATTCATAATTGGTATC
ATATTGCTAGTCTTGA
>LTR_comp2785_g1_i1
GTTATATGCATGCATACGTGCGTAATCATTCCTTCACGGTGCTCCGGGGAATGTGTTTTT
CTGTTCATACGGAATTGTATCCCGCCATGTGCGTAGATCTTCGGATAGGTAAATCAATCA
AATTTTAATTTAATGGGTAAAAATGACATCCAGAACGAAATCCGCGCCCGTCCGAGGGTA
CGCCAGAATAGGTGTTTCCTCCAATATCCTCTTCAGCGCTTCGAACGCCTCTTGACACTC
TT
>LTR_comp2813_g1_i1
GCGTTGAGGGCCCCTATGGGGATGGAGCATTTCCTTTTTGGGATGTTTAGCCTTTCGACA
AGGTCTTCCGTGATGAAATTGGTCGTTGCACCTGTGTCAATGAGAGCCCTGGAGTTGACT
GGGCGTTGCATCTCATCCATTACGTCAACTTGTGCGGTGACGAGCAACTTATTGTTCACG
GTGTCAACGGTGAATGCCTTGAAGCGGCTTCGCTCCTTCCGGCTCTCGCGAGGCTGACGT
CATTCGCCCTCTTCTTCGTGAGCGGTCGGCGATGTTCCGCGCCCCTTCATTGGGATATCG
CCTTCGTGATCCGATGATGGCCTTGGTCGATGAATCAGCGTATGGTGCTGCTGTTTACAT
ATGCGGCATGAACCCTTTCTGCATATCTCGGGTTTATGGTCGCTCCTCAAGCAATTTTGG
CATAGCGAAGCTCTCTTGGCGGCCGCTATGCGTGCGTTCACCGACAATAAGTGGAACTTC
TCGCAGCGCCAAATTCCGTGGATCCCTTGGCATATCGCGCATTTTGGTGCAGTCGCGGAA
GTCGCGGAAGTCGCGGAAGTCGCGGA
>LTR_comp2827_g2_i1
CGAGTGCAAAGGGTTAATATTTACATTATAGCACACATTGTGAACAAAAACCGATTGGTC
ACAAGTAGGTTAGCCTCACAAGTGATCCTTGTACCAGTTGTTTCGTAATGTACGTACGGA
ATTTCGTGCAATGAAGAAAAATTTGATCCAAGCGATAGATAGGGACAAGAATCTCAAAGA
CCGCGTGGAATTTGGAAATTGTGTAACACCTTTGAAAGTTGTGAATCGTATCTGATCGCG
CGCGAGCGAACGCGAAACTAAACATTTCTCGGACAGTAACTTGACGGCTGCCTAGCTTTC
GTCACCGCCCGACAGGAAGGCAAAACGATGGACACTCGAGGGTGTCATAAATCAACCCTT
TGCTCTCGGAAGTTTTTCACTAGATATATCTAACATTTTTTGACGAGACAGACGATATTC
TCTGAAACCAACATGAACAGAAATCACAAGTACATCGAGAAACAAAG
>LTR_comp2961_g1_i1
TATTTATTTATTTATTTATTGTTTCTATTTATTCATCTACTGTATTTATTTATTTCTCTA
TTCATGCATTTATTTGTCTGTCCATCATTTATTGTATTCTGTTAATTCCTTAGTTCTAAT
GGCGAAGGACCGGGTATATTAAGACCCCGGTAGTGGCCGTGACAATAATAATCATGCAAT
CAAGCACCACGTCCACCCATAATGTCTATATTTATATGTACATGCATCATCACCACTCTT
CCTATCTCTTTTCTTATTATTTCTTTCCCTGCTATTTAGTTACTCATTTATCTATCTACT
CTATTTATTTATCTACGTTTAAATTATTTATATTTATTTATTCATGTGCATGTACCTATA
AAATTTATAAATATAAGCCACAATTGTACATAATTAATTAATCTAAGATGTATATATGTA
TATGTATACCAAAGTAATATTGGATATAGCCTTCGCCATAAAGGCGCTTATGTATACCCA
CCCCCAGCCAAACAATGTAAG
>LTR_comp2996_g1_i1
TTTGAATTGGGTAACAAAGTCGGAACTTACGGTTTGTTCTCTATCAGACGTAAAAAATTC
TCCTGGTAATTTCAAACTAGAACCATATACCATTTCTGCTGGAGTTGCTTGAATATCGTC
TTTATATGTGGAACGTATGCCTAGCAATACCAATGGAAGTATTTCAACCCAATTTTCCGT
TTCGTGACATCGGATGGCTGATTTTAACTGTCTGTGTAATCTTTCCACCATACCATTAGC
TGCAGGATGGAAAGCTGTAGTGTGGATATGATGTGAACCAAGGCATCGAGTTAACTCTTT
AAAAAGTTGTGACTCGAATTGCCTTCCTTGGTCACTAGTAATAAAATTTGGAACTCCAAA
ACGTGATATCCAGCCATTCAAAAGAGTATTTGCTACTGTTTCGGCTGATATATCTTCCAT
AGGTATAGCTTCTGGCCAGCGAGTAAATCGATCCACGCAAGTGAAACAATATTTAAAACC
TTGTGAACTCGGTAATGGACCAACAATATCGATACGTATGTGACTAAAACGTGCGCTGGG
TACTGAGAAATTACCTACGGGTGACTTTGTGTGTCGTGTAATTTTATTTTTCTGGCATTG
AATACATTCTTTGGACCATTTATTACAGTCTTTATTTATTGAAGGCCAGATGAAACGGTC
GGTTATTAATTTTCGAGTAGACTTAATACTAGGGTGCGATAATCCATGTAAACTATTAAA
AATTCTCTTTCGCAGATCTTTCGGTACGTACGGGCGGATAGTAGAGGTGGA
>LTR_comp3020_g1_i1
ACGACTTTTTAACAGATTACACATTACTGTTCCGTGTTATTAAAGACGATGGACAATCGA
TTGAAATTGGGTCTCCATGGGTCTCCCGGATAATCCTTTGTAATAGGATTAAACGAACAA
CCCATTTCGCAGATGCGAAATAGCCGAAAATTCCTTCGATTCCTTGAATAGGTAATAACA
ACGGGGACCGGTCGCGAGTGCGAGCGGGAATTCCCGAATATCGCCGATAAGGGA
>LTR_comp3054_g1_i1
ATTATGTTATTTTCAATGTTATTACTAAGAAAAATCATTTACATTGCTCTCTACAAACTA
ACTGTTTTTTAGAAAGCATTTTAAATAAAATATCGTAATAATACAGGGTTGTCGAGGAAA
AACTGCAAAAGAAACTCAGAGTTCAAAGGGTTAACCTTTTGCATTCGAAAGCTTTTCACT
AGAAATGTCCAACGTTTTCTCATAAGAAGTACACAACATTTTTGAGACTAACTTATCGAG
AAATGACGCATAAACTGAGAAACGAAGATATTTTATTTCAATTTCTGATGATACATAAAC
AATATTTTTGAAACTAATTTATCGAGAAATCATGAATAAACTGAGAAACGAAGATATTTT
ATTTCAATTTCTGATGATACATAAACAATATTTTTGAAACTAATTTATCGAGAAATCATG
A
>LTR_comp3092_g2_i2
GAAATCGAATACACTGAACGGAATGTGATTTAATCCTTCCGTCGTGAATGGTATACGAAC
ATTTTAAATTAAAAAGATAGAAAACGCCTAGGTAAAGAAAAATTGTACCACACGAGAATT
TTCGTCTATGGTTGATAGCTAAAATTCTAATCAGCTGTCAGTACGTGTGTTTTAGTTGAT
TAACAGCCGTAAGTTTTTTTCACCAAATTTATATTTAAAGAAATACATATTCAGGGATGA
AAGGGTTAAATCAGAAATCTGTCGGCAATTGCGATCAACTGGCATCGTAGAAGTATTTTT
ATTAGAAATATTCAATGTTTCCGACGAGATGCTGACGACATTCTTTGAAACTAGTGAGAA
AATATACATGAATTAAGAAACAAAGGTAGTTTAGTTAAATATTTCACATATTGATGTATT
AAACAATGGTTAATATTATATATAAGGACAAAAGTTTATGGATACTGGTTAA
>LTR_comp3096_g4_i1
TGTTGATTCTAAGTTTTAACTATTCGTTTTTCACTGTTAAATCTGAATTGATCCGATTCG
CCTAGGTCTACACTAAGTCTAGAATCTTCTATTTTTTGAAGATGAAATAATGTTCTTGTA
AGTACAGCTGTAAATATTCTGAAAATTGTAAAAGCCATGATATTTCGTTTGCGTAGTCTC
ATGGCACATTCAATATAAAAATATTTATTAATCTACACTTAATATTTTGAGAAAATGAAA
GATATTGAAAAATATTATAGTATACTGTTTTAT
>LTR_comp3101_g1_i1
TCATAGTACTCAAGTGAAACTATTCATTTCCAAAATTATTTCAAGTATCCAATGCTTTTA
AGGTACGGTAGTTCTAGTGTTAACCAACATAAATGTTACCCAATTCTTAGGAATTCAAAT
CAAAAATTATACGTTCATTTGTCCACGCGAATACAGATACTATTTTAATTAGTTTAATAC
AATAAATTCGAAATGGTAAACAGTGTTGTCAACGGTATCAAGGAACTTGGCTGAAGTGTC
>LTR_comp3114_g1_i1
GATCTGCTAATCTAACATGTGCTGGTACGGATATCGCTAATTTATCTAAGCTGATGTTCG
GCATGTCTTGAGTAATTTTATCTATTGCTAAACATGAAATATCGGCGTTGAAGTTGTTAA
GCCGTGAAGTTACCTTTATGTTGACTCTATCTCGTACTATTTTTATTTTTCCGCCTATCC
CTGACACCTGCATTTCTGTCGACTCATAACTAATACCTAATCTTTTGCATAATTCGTATG
TAATAAAATTCGACTGAGACCCTGAATCAAGTAGTGCCCGACATTCTAATCTTTGTCCCC
TTCCATTCTGCACGTAAATGACTGCTGTGGACAGTACACTGTGCTCCCATGATCTACCAT
CAACGTTAGCGACACACGACGTTATTTTATTGGAGTCAGAAGGACCCGCTTCCTCGGTCG
AAATGTTGGTTGCTTGAGGAGCAGCTTCCCGATGCAACAATACGTGGTGTTTCCCATTGT
AAATATGACAGTGTTTTCGTGTGCAAGCTTGTACCCGATGACCTGTTTGCAAACAATTGT
AGCAACTGCGAGATGCCTGAACTATTTTTGTTTTTTCATCGATGGATAACGATTTGAATT
TGTCGCATCGGAACAAAGGGTGCCCAGCACCGCACGCTGGACAGGTACTCGGCGTGCTTG
CGACGGTCGCCGTTGCGCGGAAAGGCTTGCGACTACCTGCTGTTCCTATTGGGATTTCAG
TCTTCATGGGTTGAATTGGGACACTAACGCTTTCTAAATACAGTGACCGTTCTTCCAAAA
ATACTGCAAATTTATTGAACGTAACTCTATCTGAAGTCGTCGCACCCTTTTCCCATTCTC
TTAATGATGCTATGTCTAACTTTCTGGATAAGATTGGAACAATCAAAGTATCCCATAGTT
CTACCGGTTCATTTAGTGATTTTAAGGCTGCTAGGTGATTCCTTGCGTCATCAACTAAAT
TCCTAAGCGCTAATGATGATTGTTTTTGGATGCTAGGCATATCTAGTAGAGCTGAGACAT
GATGTTTTCTGATAGCGGCTGAATTTTCGTACCGCGATTTCAATGCTTCCCACGCTAACC
GGTAATTTGCCTCGGAAACTCCCAAAGATTGAACTACCCGCGCGGCTGGACCCTTTAAAG
CGGAATTCAAGTAATGGAATTTTTGTACCTCTGATAGTTCACCTTCATGTATCAAACTCG
TGAAAGTGTCCCTAAATCTAATCCATTCATTATAACTCCCATCAAATGATGGCAGCTGAA
TAATCGGTAATTTCACCGTGGCCGGTGAGTTTGTAAGAGTGGGGGAACTTGTCTGTCCTG
CAACTTGGTTTGTTGCTGTACTATTTCCCTGTGCGCGTTCTATATAAATTTCTACCTCGG
CAATTAAATTGAAATATGTTTCTTCAAACGCATCCCTATCAGCTGCGTGAGATGCTTCCG
AGTCTGTTCCCTCAACTGCCCGCTCGATCCGATTCTGAACTAAATTGTATCTATTGTATA
AATCTACATTAGCCTCTAAGCGTTTTTGTAAAGCCTTAACGGAGACTGTTGCCGCGGATT
CCGAAAAATACCGACTAAAACGAGTCAGAGCAGATTTTATTTGTCCGCGCTCGGTAGTTA
ATTTCTTTAACTCTTGTTCCATTTTAACGTTACTAACTCAGATGAAAATAGGAATCTAGG
CTTACGTGACAGGAACGGACGTGTAGTGACACTGCCTGATGCAAGTAACGCTGCACCCGT
GCGTGTCTGCTAGCTTCTGGCTGGATCCTATATTCTGCTTAGCCGCTGGATGCGGTCTTC
TCCTTTCGGATGTTGAACGTTGTCCTCTACTGCTGGACGC
>LTR_comp3141_g1_i1
GCCCACTGCCGCGGTTTACATGAATGCTTCAACACTTTGCACCTCTTACAGTTCGGCCAT
CCTGACTATATGGTCGTCCTCGACCATCCTGTTATTTAGGTTCTCTCCTTGACAATTTGT
TTCTGCATCACATTCATCGTCACCTATCCATAATTTCATTCTATCTGGACTAAAAACCCC
AGAGAACGGTTTTGAGGTTAATTGAAACCCTTCAATGTCTTTAATTAAATATCTGTCCAT
TCTTAACACTTTGTCCACTATGTAAGGTCCCTTGTATTTCGGTAAATGTTTTTGATTTAT
ACCCGGCGTAGTGACAACATTTTTAATCATGATATAGTCTCCAGCTTTATACGTATGAGG
CTTCTTATGTTTTTTATCAAATACGCTTTTGTTATATTCCTGTAACTTACGATTTCGTGC
AACAGCTGCCTCCCTAAGCTTATCCCGATCCTCATCGGTTTCATTACAGATACGAAAATA
TTCTCGAAGATCATCATCAGACAATCCGGGCTGTAGGCAACCAAACAAAAGTGAACTCGG
CTCGGTTCCTATTGCTTTGTGAAACGTGTTATTTAATGTAAATTGCGCTTTTTTTAATGC
TCGTAGCCAGGATTCTCCTGAAGATGATTTAGCTAAAATGGACCTTAAAAATCTATTGAC
GCGTTCTACTTGACCATTACTTCTAGGTGTGGCCGTCGCTGCTTTAACATGCTGGATTTT
CAATTTAGACAGAAATTCGTTAAAATCGCTAGAGGTGAACGAACTGCCTCTGTCTGATAC
CACGCGCACACAAGGTCCAAAATGATGGAAGTATTCTTTTAAACAATTTATAACTTCCTT
TACTGAAGCTGATTTCACAGCGTATAATACAACATATTTAGTGAATGCATCTATGACAAT
AAAGATATGTTTGAAACCATGTTCGACTTTTTCGAACGGACCATAATGATCGATATGTAT
TGTTTGAAAGGGTTTAATTCCCTTATCGTAAATGTGAAGTTTACCTTCTATTTTCCCGGT
TGGAACTGAATAAGTCAGGCAAGTAATGCAATTAATAATGTAATCTTTGACTAAAGCGTG
CATATTTGGAAACCAGTATGTCTTAGAAATTAATTCCATCGTTTTTTCCTTGCCTACATG
ACCAACGTCGTCATGACAAATCTTAATTACGTTACTAATCATTGCTTCGGGTACAAAAAA
TAATATTCTATCGCCGTGCTTTCTATAAACAACGCCATTTCGTAACTCGAACTTTGCGTT
TTCGGGGACCTCAAGTTCTGTATGCAATTTCTTAATTGTAGGATCTTTTAATTGTTTATA
AACTAATATTTGCTCGAACGATAACGGTTCAATTACTAATACGTTCCGGCTTAGAGCGTC
TACATGACGCATACGATCAGCTGCACGATGCTCTATCTTGTAATCATAATTTTGTAAAAC
CAAGCACCATCGATTAATGCGAGGGTTAATATCTTTTTTACTTAATGCTAATTTTACCGC
GTTACAATCAGTTACTATAGTAAAATGTATTCCTTGAAGATAAATACGAAATCGTTCTAG
TGCATAAATTATAGCCAGTGTCTCCAACTCATAACTGTGATAACGGTTTTCTGTGTCTGT
TGTTCGTCTGCTAAAGTACATTACAGGATGCATACGTTTGTCCATCTGTTGTTGCAATAA
AATAGCGCCATACCCGTACGAACTGGCATCCGTATGTAATTCAGTAACTGCGATTGGGCT
ATAAAAAGCTAGTATCGGTTTGCTTATTAACAAATTTCGTAGCGATTCGAATGCAGTTAA
TTCTTCGACTCCAAATTTAAAAGATATTCCCCTTTTGATCAAATTATATAATGGTCGCGC
GATTCGAGAAAAATTAGGCACAAATTTTCTAAAATAGCTAGTGAGTCCTAAAAAACTTTG
AATCTGTTTTACCGTCTTAGGTTGTGGGAAATTTTGTATAGCTTTAACATTCGACTCATT
CGGTGTAATTCCACTAATACTGATGTTATATCCTAAATACTCAATCTCTTGCTTAAGAAA
TTTACATTTGCTGAACTTCAGTTCTAATTTATGCCGGCCTAATAGTTCCAAAACCTCTTT
AAAAATTTCTAAATTGTCATTAATATTTTTGGTGGCGATCAAAATATCGTCTAAATATAG
CAAGACCTTTCCGGATTCCAACAGCGGTCTAAATATTAAGTTGACAAACCTTTGAAAAGC
TGCCGGTGCATTTGCAAGTCCAAATGGCATTTTTAAATATTCGAACTGTCCGTCGGGCGT
GACAAAAGAGGTAAATTTTATCGAGTCTTCGGAAATAGGGATATGATGAAAGCCGTCTTT
CAAATCCAAACTTGTAAAATAGGCATTGTTAGACAATCTATCAAT
>LTR_comp3146_g1_i1
TTATAACTCAGGCTTAATTTCTTTACTCAACTTTTGCTCTTAATCCTTCTCACTCATGAG
GCACCTCTCAGTTGCCGATTGACTTGACATAGGAAAATTGTAAAGTTCCATATTTGATAT
TACACTTTGTATAAAAAAGGAATAAAATAGTTTTGTTCCTCAATTTATGTGCGATTTCTC
GATAAGTTAGTCTCAGAAAATGTCGTCTGTATCTCGGTAGAAAGTGTTGAGTATTTTCAG
TGAAACACTTCTGGAGTACAAAGAGTTGACAGTACGATGAAAAAATTATTATTAAATTAC
CTTTTGTGGACTACCAATATCGTGATTACCGCGAAAAATGTGGCGTGAAAACTATGGTGG
CCCTAATTTTT
>LTR_comp3149_g1_i1
GAATGTTCGGGCGCCGCGTAAATACATATAAGGACGCGACCGCGGCGCGGAAAAGAGTTT
ACGAGTTACGAGTCACGAAGCAAGTACAAGTACGATTACGATATACGATCACGATTACGA
AATACGATTACGGCTTACGATTTACGATTACGGCTTACGATTTTCTAACTGTTTGGTTTG
TGCGTATTTGTAACTTTCGTGTACCTATTCGCCTATTGTTCTTAATAAAGGATAGGATCT
AAAAATTCTAAACCTACACAAGAAAACTATACAATTTGATCATCCCATGTATGCGGTCGT
GGTTACAGTTGCGGTGGTATTCATGGCTTTAGTTTCGATCTCAATGCATCTATAATTTTA
TTATTATTAGAGTTTCTTCTTTCCATATCAGAAATATTGTATTATAGCTTTCCACGACAC
ACATAAAGTATCA
>LTR_comp3179_g2_i1
GGAAAGGTGCTCCAGTAGTGGCGAGAACTTGTATCTTTTCACCAAAAGTCCTTTGGGTTC
CAAGAAATTGCCCTGGATTCGATGGCTAGAAGGGTCCATGCTGCGACAGCTTGCTCAATG
TGTCCGGAGATCATTGATCGGGCAGCTGAAAGTCTCGAAGCGCTGCAGCATGGCGGAGTT
CCGAACAGCCAGGGAAAAAATTGGGTTCGGATGACGAAGGAAACACTGTTTGTCCTCCGA
AACGTTAAAAACGAAGTGATACGTTACCCGTC
>LTR_comp3186_g1_i1
ATAAATACAAATTAAAATAAACGAGTACTGTGAGAATAATACATAAATGAATATATAAAT
AAATAAATAACATACAAAATAAGACAGGAGAAGTAAAGATAAATAAATAAAATCGAAAAA
TAGGCATATACAATTAGTGGGTTAAGTATGTACATGAATCAAAATTTCTTAGCCAGTTTC
GGGACATTAAACCGCCCGAACCTTCGCCAAAGAAACTAACGCAACGCAGAATAAAATAAC
TTAAATAAATAATACAGAAATAAAATAACAGGAGTAATACATAAATTAGATAATGGCAAA
ATAAATAGTAAAATGTAAATGACTATGTACAAATTATTAGATATTAGTAGCAATGTTTTA
ATTAGGTTGGGGCGCATGCGCGTAGGTGCAGATTCAGCGGGATGGTAAGCAGAGTTTTAT
AGCAGGCGATAGGAGTGAGCCAGGGTTAAGCCAAACTAGGTAGGTATTAAATAAATAGAG
AAAAAACAAATCAATCAATCAATAAATAAATAGGTAGGTAAATATGTAGATAAATAGA
>LTR_comp3192_g2_i1
TTTAAATTATAAAAAGATCTTATTTGAAGCAGAAACTGCTTCTTTTATAATAGCAGAGCA
ATAAATTTGTTAATTGTGAAGTTTAATAATAGGAAATAGAGGTAATTATATAATCATGTA
ATTGTATCAATCAAAGTCGACGTGAACATTTAGTAAAGAATGTTAATAAAACCCAATATA
CGTAACATTGACGCGTTCTGTAAACCTATTATTAAATACTTGGTAGTTATAGTGTTAAAT
CTCTACAAAAATATATTAAATCGGTTATATGAAAAAAACGAACAGGAAAAAAGCGCACAT
GAAAAATGCGTACAGGAAAATGCACACATATAAAGAATGTCACCATGTAAAATACGAACA
GTGCATAACCCGTACATATATGAATTGTATAATTATAAAGTAAAAGACTGCACCCCCTCC
CCGTAAAAAAACTAATCCACTTATACCAATTTTTATTACATAAATAAATCTCTTCTGAAT
GCGCAGTAGCAACAGCCGTTAATGCTTATAATAAATTACCAGAAAATTGTTGTGTCGAAG
AATACTTGCAAAACAATAAATAATTTTTTTAACAATAAGTAAGTATTT
>LTR_comp3251_g1_i2
GATTGGTAGTAAAAGTACTTTATAATTTAATCTATTTGTTGGGGGGGGATCCCCATAAGA
ATCATCAGCGACTGAGGTATGGCGTTTGCATCGAAAACATTTGGGTTTGGGTTAGGTACG
GGATACGTACTGTCCGCCTGAGAAGTGTTAGTGGTTATTCTTCACGGTGGGAAGTGAGGG
TGTCAAGAGGACTCTTCCACTCACGATGTTCGGGCCGTATCGACTTTCGGCATGTGATCG
TTATTGACCGCGCGGCAGTAACAAAGGGCGTAAGCGAGACTGAATGCGACGGAGTGAGAT
GTAACAATACAGAATGAAGTTGTCGACACTACGAATTTTATTTTCTATGGTTACATCTCA
CTTCATTGCATTTGGTCTCACTTCCAGTGTCCTCATGCCTTGCTGACTTTTTAACCCTTT
GCACTCCAGAG
>LTR_comp3260_g1_i1
GAGTCCCAAGCCAACAGACAAGATCCCGGCGTTGGACTACGAGGACAAATCCCCTAAAGA
GAACGGTAGTGTAACTCTTCGCGAGAAGGTGCAGGAAAGAACGCCAGTTCCCCCTTTGTA
AGTAGTCAGGATTTTAACACTAGAACTACCGAGGATTTAAACCGTCTTTTGAACATTTCT
TCGTGAGAGCTAGAAGCGTGGATTCATTAAGATTTTAGTTAGTTTATATTTCGGTTTAGG
TATTACCGAATCGGCTTCCTTAGTCATTTCTTCAAGAAGTACCTGCAGCTTTGCAGTAAT
TGTCACAGAAGGGATTAGAAATTGGTCATTTTG
>LTR_comp3277_g1_i1
ATGTACCTGTGACACGCGGTTCTTTGTCGGTCCAGGTAAACGTGCCGCCGATTACCCACC
CAAGTTGAGTTTTCTGAAGGATAATCCCTGATGGGAATTTGTGTTGACCGACACATAGGA
GCGACCAAAATAGGCTCGCCCCGATGAGCATATCGATCGGTTTTGACACATTGAATTCTG
GATCGGCAAGTTCTATGTGCGTTGGAATTTCTATTCTATCTCGCGTTAGTGGAAAGTTGG
GCATATTAGTCGTAATGGTGTCGATTAACAGACAATCTATGCTATCTTGGTACTTATTAA
ATTTCGAGTGGATCTTGACTGTTGTTTTTCCCTTAATGGAGTTTAACGCCCTTCCTAATC
CGGTTACTATTGATTCTATCGGTTTTGTACGAATACCGATTCTTTTACAAAATTCCGACG
TGATGAAATTTGCTTGCGACCCTGAATCTAATAAGACCCTACATTTGTGAAATTGGCCCT
TGTGGTCGCTAATGTATACGACTGCAGTTGATAACATCGTACACATTGCAGATTCCCTAG
CTATGTGTGTCACAAGAGGTTGTGTTTTTACTGATTCTAGATTTGTACTCGTGTTGCAAT
TTGAGTTCACGGATTTTACGGAGTGAATGTCGTCGCGGTGCAATAACGAGTGGTGTTTTT
TACCACAAATCTTACAATGTGACCGCGTACATTCCTTAACCCGGTGACCAGATTGCAAAC
AATTGTAGCATACGCGAGCTTCCTTGACTATCTGTGTTTTATTATCTGGATCTAAAGCTT
TAAATTTATCGCAGTGATAAATAGAGTGGGTACCCTTGCAGACAGGACATGAGTTTGTGT
GGATTATGTGGGATGTGACTGCATTTACCCTTTGGCTGCCTGGCAATTTGATTCGCTGAT
CGAACCTCTGTGACGTTAATTGATTACTACTCGCGATATTTCCTAAGTATTTTGCTCGCT
CTTCAATAAATTCGGAAAATTCTGCAAAGGATGACATTTTTGTAT
>LTR_comp3297_g1_i1
ACCTTGGGGTCAAAATCCCATTGTATTTTCCTTTTTCATTTTCTTAATCAAATTTCAATG
AAAATAATCAAACTTTGACTTCTTTTGCAATTCACTAATTCAACCTCACTATTTTCCAAT
CTCATGCCCTTGAGGCCTCTTTCTATTCTTCAAAATCCCATTTTCAAACTTAAAATCAAC
CAACAAAAACAAAAACATTTTTGGAAGAGAACTACGGTGGATTTGATCCCTTAAACGGGT
ACGTAGGCAAGGAACAAAATTCCTTCAATTCAACTAAAATAAAAATCCAAAA
>LTR_comp3297_g2_i1
CAAAATTCCTTCAATTCAAATAAAATAAAAATTCAAACACATTCTTCTCCCTCCAATTCT
TCACTTAGAACATTCTTAGGTATAAATATCATTTCAAAATAGCATTTAAAAATAAAGCGC
GCGCGTAGAAATTAAAGACGGTTCCTATAGGATACTATAGTCGTTATGGGTGCCTAACAC
CTTCCCGTAGCGAAAACAACTCCCGGACCTCGATTCTCAAGGGTTTTGCTTACTTTTTCC
CTTCCCAAGAAAAAATAAGATATCACCGGTTTAAAAGGTTCAAACGTAATCAATGTTTGA
CACCCGAAAACCAAGATAAAACATAAACAAAATTATATAAGTCTATTATAGAGTAGTCAA
AGTAAATGAAATTATTGTGAAGTGTATGTGAACTACATACCAAAAAAGCCGG
>LTR_comp3297_g3_i1
ACGCGTAGAAAATAAAGACGGTTCCTATAGGATACTATAGTCGTTATGGGTGCCTAACAC
CTTCCCGTAGCGAAAACAACTCCCGGACCTCGATTCTCAAGGGTTTTGCTTATTTTTTCC
CTTCCCAAGAAAAAATGAGATATCAAAGGTTAAAAAGGTTCAAACTTAATCAATGTTTGA
TACCCAAAAAACCAAGATAAAACAGCTGGCAACTTCACTGGGGAGATTTGAGAGTTACGC
CTAGTCTTTATTTCCACGCTTGCGCTTCGTTTTTACTTGCTTCTTTTTTTGTTTTCCTAT
GTGAATAAATGTTTAAATTCTTGCAAACGTGTGGGGTGAGAATATCAAAAGTCCTACACC
CGGGCTGAGTGAACTTAGGATTTAGGAGG
>LTR_comp3325_g1_i2
ACTTATACTTCTCGAAGGACCACCGAACGATCGGGAACAAAACTTAGAAAACGAGTAGGT
GCTAAAGTAGACTTGGTTCTTGTTGTGACTTGTTACGTTGTAATGTACTATGGGTGATCT
AAATTCCTACTTCCTCCTTTTTTTTTAACGTGGAGGAAATCTGCAAGCAGAGACCCCGAC
CGCGACTCCTCCAAAAATTAATTTTCCGGTACCGGGAATCGAACCCGAGCCTCCTGGGTG
AGAGCCAGGTATCCTAGCCACTAGACCATACCGGAGATTTCTATTTCCTCCCGACTGAAC
TTGCCAGAATCGTCTTCAACGATGCCTCGGCAGAGTCGTCTCAGCGGGGGTGAAGACGTT
CCGGTCGGGTTTTTAAGTGTAGAGGGTTGTGGA
>LTR_comp3334_g1_i1
GGAATGGGTCATTTTGACCCGTTCGGTAGTTCTAGTGTTAAAGATATGTAACGTTATCGA
AGGATTATAAAAAGTCACTAAGATGTCAAGAAATCTAAGGAACCTAAAATTACATGGCAA
AATTCGAGGGACTGTAAGAATCCTCACAAAGACTTTAGCAGCGTCCAACTGACCATAAGA
AATCTTACAGAAATTTGAAATGTTCTTAAGGCTACTAAAAGAAAGCAAAGTATCCCTAAG
ATCACAAGAAGAAATCCGAAAGACTCCGTGAGTCTGCGATGGACTTTAGAGGAATCCCAA
AAGATTTCAGGAATCAACAATGCACTTTAACGGACTTCATCAAAATGAATCATTCATCGA
CTGAATCGAAAAATAATTTCCAACTACCCAATGGTAGCTAAAGAAAGTAAAAATAGCTCA
AGTAGGTCAGGAATAACAAGGGTTAGCAGACTTGACTGCAAAAAATCTTGATGGATCTTT
TGCACCCTAAATATCTCATAGATCCTCTTAGCGTAGGAATCCACTCAGAAATGAGAACCC
GCGACCATTTTGCGTCTATTTCCATACTTTCTGTTCGTCGGTGCGCACGATCAATCATTG
ATTGTAGTACCGACTCTGATACATTAAATCATCGTCCACGCTCATGCAAGTTTTCAAGAG
TAATTACATAAGAATATTGAAGCGAAGATTAAATGTGCATTTAAAGCGACAGCCGGGCAA
CGTCATTTTTCATTCGGCGTGTACGGATACGGTCGAAGCATATTTA
>LTR_comp3339_g3_i1
AAACTTTCATGTTTGTAATACTAAGTTGCAAACAAATGATTCAACTACTTGAATAGTAAG
AAATCGGAATATAGTTTCCTTGTTCTCTACTATTTAAGCATTCAATATCTAATTTAACAG
AATCCGCAAAAGGTTTTGCGTGCTCTGAACAACCTTCGCCCGCAAATGGTTAAGGCTGCT
ATACTCATTGAAACTTACCGCGATTGGTTTG
>LTR_comp3342_g3_i1
AGTCCACTTTCAAAATTAGGGGTATGTATGACATTTATATAAAATACTTTGCTTGATTTA
TTTGCTATGTTTTACACGTGTAAAAATTGTAAAAATAACATATCATGTGAAACAATTGTG
AGAAAGGCACGGTCTACAGCGAGGGTATTTCGAAAACGACTGTGGAACAATGCAGCCAGC
CACCAGTTTTCTGGACAAAACTCAATAACTTAAAAAGTATGAGTGATACAAAAAAAATGC
TTCAGACAAAAGTTGAAAGATATAGAGTTAAGCACATGGTAGTTATATTTTTTCACATTA
TGGGGATATTATGAAGCTTTTTAAATGACAATACATATTTTCCGCTTCGATTACAACGTT
ATATAAATAGAGAAACAGAATTTATTTGCACAAAATGTTTATTTTTCAAATGAAAATCAT
TTTGTATAGCAGGGACTACTTAGCAACACATTGGTAACCTTCAATTTTCGTTATGTGAAT
AGTCGAATTTGAGTGTTTTGTCCACAGACGGTCGCACTGTGCGACGCTCGGGGTCGTCGC
ATTGTTCCTAGCGATACTTTATTGTACACTTGCTGAAGGAATTACAAACTCTTAAATAAC
TAACTCGAAAATTAGATTACATTTCAACGTACGAAACCTAGATAAAACTTGTCTGTTTCA
TTGATATTTAAAACGTCGTTCACATA
>LTR_comp3342_g3_i3
GGTACGGTAGTTCTAGTGTTAAAACTACGCATTCGTCAAAATGACAGGTTTCAACTTCCT
CATATCGCAATTATCGATACCTCATTGCATCAGGTGCTGTTACCCTACACTCCAACGCCG
CACAGTGTCAAACGGCTGTTTTCTGGACAAAACTCAATAACTTAAAAAGTATGTTTAATA
CCAAAAAAATGCTTCAGACAAGTTGTAAAGTATTAAGCTAAACATAAAGTGATTATATTT
TTTTTACGTTATGGGGATATTATGAAGTTTTGTAAATGACAATGAATATTGTGCATTTCG
ATTCAAACGTTATATAAATAGAGAGACGGAATTTATTTGCACAAAATTTGTATTTTTGAA
ATGAAAATCATTTTGTATAGCAGGGACTACTTAGCAACACATTGGTTTTCAATTTTCGTT
ATACGAATAGTCGAATTTTTGGACTCTGTCTTTCAATTGCATCGTTCTCACTTGAATTCT
GGCCCTTCCATTTATAGTCCAGATTAGATGGTCACGTAGGTACAGTGCGTTACTAATGTA
AGCCAACCCGGCCTGTGTCTCAATAGTGAAGAGAGGCAAGGGGACTCGGCCGCACGCTTT
ACCTCAGCTCGTCATCATGTTCTATACAATTCTTACGTTACAATACTATCTAATTATTAA
CAC
>LTR_comp3342_g3_i6
GTCCACCTACCTATATTTAGTATAAATTCTATGGAAATGAAAAAACATGTTTTCCATCCT
CTTAAGCCCTTGCCACATTATTTTCATTACGACTAATTGTAAGCTCGACTAAATAATTGT
ACTATCAATAATTTACCAAAATATGAATAAATTCATAACGCGTCTAATTCAAGGTGAAGG
ATTTAAACAGAATTAGTTCCCTCATAAGTTCCATTAAAATCAACCTATTGTAAATGCTTG
TAACAGCAGACATGATCGTCGCCTCGGTCCTATTTATAGATTCTTCTTCAAAATGGCTTC
CGACCAACTATAATATGTCATATAAATAGAGAAACGGAATTTATTTGCACAAAATTTGTA
TTTTTGAAATGAAAATCATTTTGTATAGCAGGGACTACTTAGCAACACATTGGTAACCTT
CAATTTTCGTTATGTGAATAGTCGAATTTGAGAGTTTTGTCCACAGGCGGCCGCACTGTG
CGCCGCGGGGGTTATCTTATCGCGCACACTGCGAGGGTTAATTCAATGGAATAATCGAAA
TGCATTCGTTCGTCGAATTTTAGCCGATGCAATATTTTCCATGAAACATCTTTTCATCGT
AACAATGAGTAACGGGTTGTTTCAGACCACCGGTTTTCTCGTTGAAGCCATTTCGCCGCG
GAA
>LTR_comp3342_g3_i7
AGTCCACTTTCAAAATTAGGGGTATGTATGACATTTATATAAAATACTTTGCTTGATTTA
TTTGCTATGTTTTACACGTGTAAAAATTGTAAAAATAACATATCATGTGAAACAATTGTG
AGAAAGGCACGGTCTACAGCGAGGGTATTTCGAAAACGACTGTGGAACAATGCAGCCAGC
CACCAGTTTTCTGGACAAAACTCAATAACTTAAAAAGTATGAGTGATACAAAAAAAATGC
TTCAGACAAAAGTTGAAAGATATAGAGTTAAGCACATGGTAGTTATATTTTTTCACATTA
TGGGGATATTATGAAGCTTTTTAAATGACAATACATATTTTCCGCTTCGATTACAACGTT
ATATAAATAGAGAAACAGAATTTATTTGCACAAAATGTTTATTTTTCAAATGAAAATCAT
TTTGTATAGCAGGGACTACTTAGCAACACATTGGTAACCTTCGTTGGGATTTTAGATAAA
CTATGCGTTCGAAAGCTGAGCGTTCTGTCTCCTCACTACTGTTCACTTTTGAACCAACTG
TCAACTTGGCTGACGCGATACCCCAGTATTCGGTGAACGCGAGGAAAGCTGAGGTTTTGG
TATTTGTACTTCTAAAGGAAGAACGAAACGATAGCAATGAAAGGAAAAAAGAAACTCTTC
GACGCTGTGAAAAGGATTAATCAACCCGAAATTCGATTAATTTCAAAAGTCCCGTTCCTC
TATTTACGCAACG
>LTR_comp3342_g3_i9
GTCCACCTACCTATATTTAGTATAAATTCTATGGAAATGAAAAAACATGTTTTCCATCCT
CTTAAGCCCTTGCCACATTATTTTCATTACGACTAATTGTAAGCTCGACTAAATAATTGT
ACTATCAATAATTTACCAAAATATGAATAAATTCATAACGCGTCTAATTCAAGGTGAAGG
ATTTAAACAGAATTAGTTCCCTCATAAGTTCCATTAAAATCAACCTATTGTAAATGCTTG
TAACAGCAGACATGATCGTCGCCTCGGTCCTATTTATAGATTCTTCTTCAAAATGGCTTC
CGACCAACTATAATATGTCATATAAATAGAGAAACGGAATTTATTTGTACAAAATTGTTA
TTTTTCAAATGAAAATCATTTTGTATAGCAGGGACTACTTAGCAACACATTGGTAACCTT
CGTTGGGATTTTAGATAAACTATGCGTTCGAAAGCTGAGCGTTCTGTCTCCTCACTACTG
TTCACTTTTGAACCAACTGTCAACTTGGCTGACGCGATACCCCAGTATTCGGTGAACGCG
AGGAAAGCTGAGGTTTTGGTATTTGTACTTCTAAAGGAAGAACGAAACGATAGCAATGAA
AGGAAAAAAGAAACTCTTCGACGCTGTGAAAAGGATTAATCAACCCGAAATTCGATTAAT
TTCAAAAGTCCCGTTCCTCTATTTACGCAACG
>LTR_comp3342_g3_i10
AGTCCACTTTCAAAATTAGGGGTATGTATGACATTTATATAAAATACTTTGCTTGATTTA
TTTGCTATGTTTTACACGTGTAAAAATTGTAAAAATAACATATCATGTGAAACAATTGTG
AGAAAGGCACGGTCTACAGCGAGGGTATTTCGAAAACGACTGTGGAACAATGCAGCCAGC
CACCAGTTTTCTGGACAAAACTCAATAACTTAAAAAGTATGAGTGATACAAAAAAAATGC
TTCAGACAAAAGTTGAAAGATATAGAGTTAAGCACATGGTAGTTATATTTTTTCACATTA
TGGGGATATTATGAAGCTTTTTAAATGACAATACATATTTTCCGCTTCGATTACAACGTT
ATATAAATAGAGAAACAGAATTTATTTGCACAAAATGTTTATTTTTCAAATGAAAATCAT
TTTGTATAGCAGGGACAACTTAGCAACGCATTGGCAACCTTCAATTTTGTTATGTGAATA
GTCGAATTTGAGAGTTTTGTCCACAGGCGGCCGCACTGTGCGCCGCGGGGGTTATCTTAT
CGCGCACACTGCGAGGGTTAATTCAATGGAATAATCGAAATGCATTCGTTCGTCGAATTT
TAGCCGATGCAATATTTTCCATGAAACATCTTTTCATCGTAACAATGAGTAACGGGTTGT
TTCAGACCACCGGTTTTCTCGTTGAAGCCATTTCGCCGCGGAA
>LTR_comp3342_g3_i11
AGTCCACTTTCAAAATTAGGGGTATGTATGACATTTATATAAAATACTTTGCTTGATTTA
TTTGCTATGTTTTACACGTGTAAAAATTGTAAAAATAACATATCATGTGAAACAATTGTG
AGAAAGGCACGGTCTACAGCGAGGGTATTTCGAAAACGACTGTGGAACAATGCAGCCAGC
CACCAGTTTTCTGGACAAAACTCAATAACTTAAAAAGTATGAGTGATACAAAAAAAATGC
TTCAGACAAAAGTTGAAAGATATAGAGTTAAGCACATGGTAGTTATATTTTTTCACATTA
TGGGGATATTATGAAGCTTTTTAAATGACAATACATATTTTCCGCTTCGATTACAACGTT
ATATAAATAGAGAAACAGAATTTATTTGCACAAAATGTTTATTTTTCAAATGAAAATCAT
TTTGTATAGCAGGGACTACTTAGCAACACATTGGTAACCTTCAATTTCCGTTATATGAGT
AATCGAATTTCGGAGTTTTCTCTACAGGCGGCAGCATTATGTGGCGCCGCGGATTTATGT
CGAACCTTCTCCTCTGTTCTCACGAGGATAAAGGACAGTTATCCGTAACCTTGAAATTGA
AGAATCGAGCGCGCTTCCTTTGTTGCTGAATCATGCTCGTAAGGTGATTATCATGGATGA
CGCGCAATTACGGTCGTTAT
>LTR_comp3362_g3_i5
GTTTTGTGTATTTTGCTCTATGAAGTCGCGCGGCATATAACGTGTTAAAATTAGGCTCTC
GTGAGGTTATCAATCTATACCCGTGGTTTCTAACATGAGAGGCGCCGAAATTTTTAATAG
AAAATTAATGTTCATACCATAATATCTACAAATAAATAAACTTCATATCGTAACGTAACA
GTACAAATTCAGTGAAGTAATGTTTATTTTGTAATAAAGTTATTATTATTTAAAACGTGT
CTATATTATTATATCTATTAAAAGATAGGAAAACAAATTATTTCAGGAAGTCGTAGCAGC
ATAAAGATTGGAAACCGCTGCGAAAGCACGCGTTAATTAATAATTAATAATTTCATTTAG
TTTCGTTGCCTTACAACAAAGCTATAAAACAATTCACTGAACGTTCCACGGACAAAACGA
GCGGCATATCATCTCGGTGTTCAGAAATAAACGAAAATATCTCGCGAACGGCGAACTGGC
TTCGTATATTTAATGAAAAATTCCCGTAAATTAAGTTGCGCGCGAATCCAGCCACGATCC
AAGCTCCGGGACTTCATATTTATTTATCACCTTCGCTGTTCCGTTATGCTCCCCAGGCAT
TTATCATTTCGAGAAGGAAGCAAGAATAAAAATGCGCGACGCCGGGAAATTATGGCTCCG
CGCTGTTTCTCTGCTTTTGTGTTCA
>LTR_comp3362_g3_i8
GAAGTTACTAGGCTGAAGTGCGACAAGTTGGACCTACTTAGGCAGAATGTGGTAAGGACG
GATCGGTTGGGTGTAAGATAGTAAAGGAGGTTGAACAGTTTCTGTTAAATCCGTTTCCAA
TCTGGGAGTTGGAAATTTTTAATAAAATATTAATGTTCTTACCGTAATGTCTACGAATAA
ATAAACTTCTTATCGTAACGTAACAGTACAAATTCAGTGAAGTAATGTTTATTTTGTAAT
AAAGTTATTATTATTTAAAACGTGTCTATATTATTATATCTATTAAAAGATAGGCAGGCG
TAGTAGCATAAAGGTTGGA
>LTR_comp3363_g1_i1
CCGATTATCCCTCCCCGCGCGATTCAAAACTACCCCTTCCCGCAAGGTAGAAATGGAGCC
GGGGGCACTACGGGGGACGCTCGGGAGTCGCGTGGGGCTAGCAGGTGTTACGCTACTCAC
CGAGGATTCTCCGGAGCACCCTGCTCCAGGTCGATGCGCACTATTGTGCGCAACGCTGTT
GTTGTTATTATTGCTGCTGCTGCTGCTGCCCGGT
>LTR_comp3377_g4_i1
ATAAAACTATATAAAACTATTGTTATGTGGGATCGTAGGTAGCAAATCCGGCTCGAAGGA
CCAAAAATGTTACGCTACGATCGACGTGTGATGCCCGCCAAATTAATCTTGGGCACCTGG
ATCCGTCGGTAGAGCAGTGGTCGCGTGTTCGCGTTACGTTTTGTTCGAATCGAGAATTTT
GTACGAGTCTGTCGTGTGATAGACTCGAAGATGATGCGTGATTGAGTTTTCCGAATGTTG
TACGAGAACTCTATTTGTCGAACGCGTGTCGTGAACTATGGAAAGAACAGTTTTGTCGAA
TGCGTGTGTATGACTGTCTTGACGAATGCGGATGTCTAACTGACTTGTCGAATGCGGATG
TATGACT
>LTR_comp3378_g1_i1
CTTCAAGTATCTGATCTCTGACGCCACATTCATGTTCGAGTACCTACTGGTCACAGACGA
TATCGTTTCACGTCTTCCTTGAACTGAAGGACAAGTGTAGTGTCACGGGGGAGATATCGC
GTTTAATAAAATAAATCAGTATATGTTTAACAGGAGGTATTTCACTTGCGAATATATTAT
TTCCCTAATAAGATCAGACCGTGGAATGATCTATTGAGGAGGAGAATGACAAACCGTGAC
GTTCGTTAATTGACTGAGCGCTTTATTAAGGTTCCGATGGTCTTTTATACACCTCGGGAG
AGGGGCCTACGCGACCCTTGATGCGTCGTTCGTGTCTTGTGTGGTCTGGCAGGATGTGGC
TATCGTTTGATAAGCCTGTGTTATAGTTTCAGGTAGCCCGGCGGAATGTACTTATCGGTA
GGTGTTGTTTAGACTAGGCCTGCGTCACACATCAGTCGTTGGAATGTGGGCGGTGCGTTT
TTTTTTAGATCAAAAGACATCCTAACAAATTCTAAGTGTCCGTCGTACGTCGAAAAAGCT
GACTTATGAACGTGATGCTCCTTGATTCCAATCTGGTTTT
>LTR_comp3384_g1_i1
ACATTTTGGTCCTTCGAGCCGGATCCTCGGCCTACGGAAGCAGTGCGTGGAACACGAACG
AGCCGGAAACAAGCATCGAGACGACAGCAAGGGAACCAGGAGGAATCCAGGCTACACCTA
CAAGGCAATTCGGGAGAAAATCGTCGAGGTAAGCTCGTTTCGAATTGTCGATCTCTCAAA
TATCCTTTCACAATCCTCGCTTCTATTAAAATGGCAACGAACGTAGAAGCCAATAGCAAC
GAACGCATCCGGATGCTCAAGTATAAACAACGGGCATTCAAAGGCCAGGTGACGGTATTT
AAAGATTTTATTCACAAGCTACAACCTTCCGAAAACGCGCCGTTCAAACTTCGCGAGCGC
ATTGAGCGTATACGCAGTCTCTTCGACTCCTTCAACAGGGACCAAGATGAATTGGGGTAC
CTTGAAAATCTGGAGGGTTTAGACCCCGAACGCATAACAATTACGGACAATTACGACGAT
GCCCTCGCGGACGCCCGCCGTTTGTTAGATAGCCTTGAGAAACCGGCCCGAAACAGCACA
CCGGTCAACGCTTCCGACTCCTCCTTGATCGGGTCTCCGTCGCACCCGATCACCATCAAT
TTGCCAAAAATAGATTTGCCAAAATTCGACGGGAAGCTCGAAAACTGGACGACGTACAAA
GACGCGTTTCTTACGATGATAGACGCCCATCCAGGTCTTGCAAACAACCAAAAATTAAAT
TATCTGCGTCTATCATTATTGGGCCAAGCCGCGGACGCGATCGGTGCATTCGCGATCACA
GAGGATAACTATAAAACCGCGTGGACTCACCTCTGTGAAATCTATGACAACAAACGCGTG
TTAATTCTCCGTCATGCCGCGTTGCTTATTGATACGCCGACGATGCAAAACGACTCCCCG
GAATCCATTCGAGCCCTACGAAACCATTTACAGCTGCACATTAGGTCATTGCAGGCTCTC
GGTCGGACGCCAGAAGATATCGGCAATGACCTATTGTGTAGCCTCGCGATTTCGAAAATG
GGAAAGGGCACCCTGAAATCGTGGGAACGTACCCTGACCGATACAGAGGCGCCAAAAATC
GAGGAGGTGTTCAAACACCTCCACATTGCGGCGCATCAAACGGAAAGCTACGTTTCCACG
ACCTCGACGCGAACCACGTTACGGAACCATCACGAGGTTCCAAACAAGGAGCCGAAAGGG
TCGGGCAGGCATCAGAAGCATTCGAAACCAAGCCCGACGTACTCTCAAGTCACGCGACAT
CGGACGTACGTCACGAAGGAACGGACGCCACCGTCGTCACCGCGTTCGACATCAATCGCG
CGTTCGACCTCATCGCGGGCGTCGACACCGCGGTCGACACCACCCTCGTCGCCTTCAACG
CAACGACGACGAATCTCGCGCCCCTCTTCACCGCGACAGGAGGAAAACACGCCGCGTTGC
CACCTTTGCAAGGGAGTCCACGCGATGTATCATTGCGCGAAATTTGCCGCGATGACGATA
GCCGAGCGAACCGAAGCGGCTCGAAAGGCAGGGTTGTGCCTTAACTGTCTCCGAGACGGT
CACAAAACTGAGAACTGTCGATCCGGGACCTGTCGTGTGTGCCACGGACGACACAACACG
AAGCTTCACCGTCATAACGAGACAGCTAAGGCATGACTAAGGGTACCTACACAAACCACG
TCACGTCCGACGGCTACACAAACCACGTCACGTCCAACGGCTACACAAACCACGTCACGT
CCAACGGCTATACAAACCACGTCACAACCAACGGCAACACGAACCGCGACACGAACCGCG
ACACGAACCGCG
>LTR_comp3391_g15_i1
ACACTTACGTTGTCTTCGTTATTTATAATATATTGTATTTCCCTGAGCGACTTGAGCATT
GAAATATATTTATATATTAGTATATTTTGACTTGTCGACATTTTCGCCTGGTATACAACA
GAACAATGGCGTCGGATTTCCTTCTGGCAAAGCAGTGGCTTATGTTTACGGAATCTCGAG
ACACGGAGGGCCGGGTATAGTGAACATTGGATAATTGCAACATCGTCATCCCCACCATAT
CCCCCCCCGGTTCCTTT
>LTR_comp3392_g5_i1
TCTCTATTCCAAACCGTCTTAAAGTCTCTTCTGTATACTTCCGCTGTGATAACGTAATTT
GTCCATTTTTTTTAACAATCTCTATTCCAAGGCAATACTCAGCTTTTCCTAAATCTCTAA
CTTCAAATAAATTCATTAAATACAACTTAAACATCTTGATACAATCTCTACTATTTGACG
CAATTAGAATATCATCGACATGTATTAAAACGATTATAATAGTTTCTGAAGTTCTCTTAA
AATAGACACACGGATCGTTAGCGACTGGTTTTAATCCAAACTCTTTTAATTTACAATCTA
GTTTAATATTTCATTGTCTCCCAGCCTGTTCAAATCATTGCTCTTTTTCTTCCTTCTGGA
GCGCAATTCTCCTGAGAAATTTACTCAAATAAACTGGAATCTCCATGAATACTTCCTCCT
CTAAATCTCCATTTAACCCTTAGGGTGCTGAATACTCGCGGCCTATGTGGTCCGTACGGA
CGGCGCGCGGCCAGCGCTGACGATCGCTGTAGACGGAATACTTTTTCGCTAGACTGAACT
CTGTTGATGAACTATTCAGAGCGCAAATCGTAATGAGTTATAGTAATTCTTTCACACGAG
ATTAAATGATTCAAGAGCGTTATTTTTTAGTATTAATTCTTTATTATAAACATTGAAATT
TAAAATAAATTAAAATTTGCGTAAGAAAATAGAAAACGATAAACTAGAAAACTAAATTTA
ATAAATATAACGGAAGTCAATAATTCAATTGTGTGTGGAAAATTTCAAAACAATTATCAA
TATAGTCCGACATCGCATTTTCTACATTCGTAACGCGTTTCGCTCCTTCTCTTATTTTTT
ACACAAACAACACATTTTCTTCGGGATAGTTGTGTTGTGCCGGCCCGATTAGGTCATTTT
GACGGAAAATGCCTATCAATTAACCGAAACGGTAAATCCTCAGATTTTCTCTTTTCTCCT
TCTATCA
>LTR_comp3408_g1_i1
ATAAAACTAATAAAACTATATAATGTAAGAGGTGGAAAGTGTTGAAGCGTTCATGTAAAC
CGCGGCAGTGGGCACGCGTTCGCTCCCGCGTTTTTGATAAACAAGGGAACACCGGTTCGG
ACGCGTTCGCCCCGCGTTTTGTTTCATTATTCACTTATTATGGAGTGATGATACGCGTTC
TGGTGAGTCGTCGCATGGTCGTATGGTCGATCGTATAATGTGTAATCCCGTTTTTGTTAA
ATATACTTTATCAATATCAGTTACAATAAATTTAATATTATAACCAACGAAAGTGTTATT
GTGTCACCCAAAGAATCGCTTCTACAAAATTGAAAACTCGTTCCGCCGAATTTTCTCTTG
CCATCTTACAGTGTTAATCCTCAGAAGTGGGATTCGGGTTCAACGAAGACTTTTAAGTGA
ATTTTTATGTGAACTCTTATGTGAACTTTTAAGAAAACTTTTATGTGAAGGATTTTTGAA
AAAATAGCGTGTGTGTGTGATTTGTGAACTTTGAAACAAACTGTGAAGATGAGTCAAAAT
TTTACGATTCAGCAACTGAAAAAGTGTTTGAAGCGATTTGATCTGCCAACGTCAGGATCG
AAGAGCGAGTTATTAGCAAGGCTAAACGCGGCTGATCCAGAAGGTTCGTGGATGTCCCTT
TCGAATGAACCTGGCGCATGCCAAGAACTAGACGAGACAGAGATGGTCGAACAACAGACA
GGTCCATCGAGCCAATACGAAAGGGAGTTAGAATTTGTTCGACGAGAGAGAGACCTTTTG
CAACGCGAAATGGACTTGATGAGACGAGAGAATGAAATTTTAAGAAATTCGCCTCGGTCA
GTACAAAGTCATGGGCCGAATGTTAACGTGAGAGCAGTTGGCGATTTGTTGAGCGACTTT
GATGGATCCACCAATACCTTTTTAGTGTGGGAAAAATCTCTCTTATTATTGAAGAATACG
TATGAACTGGATGAAAATGCTATCAAGGTTCTCATCGCGGCGAAACTGAAGGGAAGAGCG
TTAGAGTGGCTTCACTCAAAGCCCGAATACATTGAAATGAATGTGGAAAGTTTATTATCC
AACATGAAAAAAATGTTTGATCATCGCCAAAATAAGTTAGCGCTAAGGAGAAAGTTTGAA
GAAAGGTCATGGAGAATTCAAGAAAACTTCAGTGAATATCATCACGACAAGATGATTTTG
GCTAATCAAGTGGGTGTCGAAGATGAAGAATTGATTGACTACATGATCGACGGGATTCCG
GACGATCTGTTACGTAATCAAGCGAGAATGCATCGCTTTACGGAACCGTCCGGATTGTTA
GAGGCGTTTGAGAAGATATCCTTGAAACCCAAAACGAATAAAAACGTCGTTGTCGACAGA
AGAATTGTAACGAATCGACAGCCCAGTGACAATGTTAGTGCTGTAAACCCACTGCAGCCT
GTGCGGCGGTGCTACAACTGTTATGGAGAAGGACATCTGGCAGGCTCCTGTCCCAAACCT
AAGAGAGAGCGTGGGTCATGCTTTTCCTGCGGTGAACAAGGACACGGCTACCTGAGGTGT
CCAAAATCTTCAAAAGTGGAGGCACCGAAGCCGACAAGTGTGTCGCTGATCGACGGGTCG
CAGAGTTCAACGACTGAAGGACAACGAAGGCGTTCACCACTCCAGGGTCCGTCTCGGGAT
TATTGTGTCCTATTGACGGAGGAAAAAGAAGAAAATTACTTCGTAGAAGCGTTAGTGGAT
TCAGGCAGCGCGATAAACCTTATGACTTGTGAGACGTTTAATAACTTTTTTAGTAGCTAC
GAACTGCTGCAAGGTAAGGACAATTTTAATTATGGTGGAGTAAACCAATCACCATTGTCA
ATTATGGGGTACGTGAATATTCCAATTAAGTTGCAGTTGCTACCGCATGATGTTTTTGAA
GTGCGATTTATGGTGGTACCCAACTCGACGATGACATATAGCGCTTTGTTAGGACGCGAA
TTTATGACGAGACCTGGAATGACGGTTGTTCTTAGCAAAGTAGTGAGCATTCGCTATGAT
CGAGAGTATCGAGATGAAATATTAAATATTGAGTCCATAGAAACGAAAGAAAAATTAGAT
ACAGTTACAGACAATTTGGATGCATCGCTTTCCGTTGAAGTTAAGCAAACTTTAATAGAA
TTATTAAAGAATTATGTAAACTTAAAAGGTACTGCTGAACCGGTTGATTATAAACTTCAA
ATTACACTCGCCGAGAATAGTAAGCCCTTTTATTTTTCGCCTAGGAGATTGTCGTGGCAT
GAAAAAACGGAAGTTCGGAAAATTATTAATGATTTGTTGTCTCGAGGGATTATTAGACCG
AGCAATTCAGATTTTTGTAGTCCGATTGTTTTAGTGAAGAAAAAAGATAGTACTTACAGA
CTTTGCGTAGATTATAGGGCATTAAATAAAATCACTGTGAAAGACAGGTACCCCCTCCTG
TTAATAGAAGACCAAATTGATAGATTGTCTAACAATGCCCATTTTACAAGTTTGGATTTA
AAAGACGGATTTGATCACATCCCTATTTCCGAAGAGTCGCTAAAATTTACCTCTTTGTCA
CGCCTG
>LTR_comp3417_g1_i1
ACAATAAATATTCTCGATACTACACTCGGCCATTCCTGACCGAACATCTGTCCTCAGATG
TTTCATTGTCACTTTCTAGGTTCTCTCGGTGTCACTACACAAGTGGTCAGTATCTGGTAT
AATTCGTCGAGGTTTTCGGAACAGAATTGACTGTTTCTTCCAGTGTTCTATCGCTAATAA
GGACCCTAAGTAATTGCTGTGAAACGTCACTAACAGCACTTCACCGTTGCACATGGAAAA
TACACATCCCTTCTCTATACAATTCAAAAAGCCTTTTTGCTTCCATTGTTTACACTTCGC
CAAAATACAATCAACGCAGTTTTGTAGCACTTTGTCCACCTTTTCCCGCAAGTTTCGGAA
CCGATAATCCCTTTTTAATCTGGTCTCGGTTTTTTCCGACGCAAAATGCCCGTTCTCGTG
GGCCCGCTTAATTACCTGAGTCGGCATCGACTTAGATACCGCAAGGCTTATGTTTCCCTC
AGACTCTGACTGTTCAAATATCTTTTTAATACCACGATCCTTTCGCTTCGCTTTCCCTAG
CCTACCGTTTCTATTATTTTCGTTTTTACCCACCAATATACACGATGACAGAGAATTACA
ATTCAAAGCGTTCACATAATCGTTGGGCTTAACGTCTTCAACTTCTTTCTCAACTAAAGG
GGTGATGGTTACCTTTAAGCTATCTACCTTTGAAATTGCTTTAACATCGCTAACAATTTT
CTCGTTTTTAATCTGTATTGACCCGCTAGTTTCTAAGCTCTCTTCAGTTTTGACAGGCGT
GCTCGGTATCAAGAAAGAAACTTCACTCGATAAATCTGTGCAATTCCCCCTAGTAACCGC
GGCATCACAAAAATCGAACGAGATAGTCCCTAATTCCTTACTACTATTGTCCTCGGCTGT
TTGACCGGCGTTGTTTGATAAATTCTTCGAAGGTTCCGTAATCGCGACATTAGAATCGTT
CACAGGCGATAAAAATTCGGCCAACGCACCCTTCGCGTTGTTAGCCTCACGAGCATCGTT
TTTAGCGCCGCTAAAGGCGCTTACCTCACGCTCGTAAACAAATACTTCCTTCATGT
>LTR_comp3419_g1_i1
AAAATGATTCTGTATGGAGCCAGAAGCATTCAGGAGTTGAAGGAGAAATGTATGCTGTAC
GAGTCGATGAAGGAGAATATGAAGACGAAGAGGAAGCCAACGGAGACACGGTCCAGCCGT
GCAGTCGTCCAGGAGGTTGTGCGTCGCTGTTTCCTGTGCGGGGATCGGAACCATCTGAGT
TCGAGTTGTCCAACCAAAATTAAAGGCGTTAAATATTTTAAGTGTAGAGAGTATGGGCAT
ATTGCGTCTGATTGTAGCAGTGTAGAACAACCTGTAAAGGATGTAAATAGTGTGTCAGTG
ACCAGGAGACCAGATTAAAAAGGGATTATTGGTTCCGAAACTTGCGGGAAAAGG
>LTR_comp3419_g1_i2
AAAATTGGGGGCTCAGCCGGGATCGTGAGATCAAAAATTGTGGAATCACAGTAATTAAGA
AAATAGGAAAAGCGTTGATTCGTGTTGATTTGTGCTGACTTGTGTTGAAAATTGCGTTGA
AAATGAGTGAAGAAGGAAACAATACCATTGTTGAAGTAGTTAACGGACAGAAGACCAGCG
AAAAGTTGGAGAAGATATACTCCATGAGGCTCACCGAATTGAAGGAAGAACTGGGAAGGC
GTAAGCTGAAAAGAACGGGCAACAAAAAAGAGTTGCAAGACAGGTTGAGGGCAGCCTTCA
TGTTAGAGTTTGAGCATGGAGAAGATGAGGCGGAAGAGGAATCAGAAAGCGAGGTGGAAG
AAGAGCGAGATGTTCGAGGTCGTATGAGACTCCACAGCAGTTCACATCTGTTAACTTTTC
GAGATGTCGAGGAATCGATGAGTACGTTCAGTGGTGATGATGGGGTAAACGTTCGTTGCT
GGGTGGAAGAGTTCGAAGATATGGCTGATGTGTGTGAATGGACGGACGTGCAGAAGGTGG
TGTACGCAAAGCGGCTTCTGCGTGGTTCAGCCAAGTTGTTTGTGAACTACGAGAAGTGCG
GCAAAAGTTGGATTGCATTAAAGAAGGCACTGAAGTCCGAATTTACAGAAAGTGTGGATG
CGTATACAGTCCACAAAGAATTGTCCCGTCGCAGCAAGAAACCGAGTGAAACATACAACG
AGTACATTTACCAGATGTTTGATATCGCGAAACGAGCGGATATGTCGGCTGTGGCAGTTA
TCAAGTATATAGTTGATGGTATCCACGACGAGGAGGTGAACAAAATGATTCTGTATGGAG
CCAGAAGCATTCAGGAGTTGAAGGAGAAATGTATGCTGTACGAGTCGATGAAGGAGAATA
TGAAGACGAAGAGGAAGCCAACGGAGACACGGTCCAGCCGTGCAGTCGTCCAGGAGGTTG
TACGTCGCTGTTTCCTGTGTGGGGATCGAAAACATCTGAGTTCGAATTGTCCAACCAAAA
GTAAAGGCGTTAAATGTTTTAAGTGTAGAGAGTATGGGCATATTGCGTCTGATTGTAGCA
GTGTAAAACAACCTGTAAAGGACGTAAATAGTGCGTCAGTGGGATCACGGAAAAAGCGTA
TCAAAGAGGTGCAGATCGAGAATTGTAAGTTGGTAGCGTTAATTGACTCAGGTAGTGACT
TAAATTTAATACGAGCAGATCATTACATTAAAATCGGAGCGCCTAAATTGAATAACAGAA
TTTTGCGGTTTCACGGTGTAGGAACAAAAACAAATTATACTATGGGGGAATTTTCTATTA
ATATTGTAATAGATAATACAACATATCCGATGAATATGCACGTTGTGTCCGATGCGTTGA
CGCCACATGATCTAATAATAGGGACAG
>LTR_comp3420_g1_i1
TTGCTCAAGAACACAATCAAGAGACTTCCTGCTCAAGCACAACTGCAAGAGACTTCCTAA
CAAAACAAAATTACACAGAAAATTTTTTAAGGTTGAACACTTGATATACAATCAGAGGTG
CTCACAATACAAATCAGATACAGACTCAATGGACTTAAGAATTTCTAAGATATGACTTTG
AGACACAGAAATTCTAAGTGAATGCAGAACAATTTCAGCAGAGGTTTGGCACTTGTAATA
ATGTTGTGAGTCTTTCGTTCAGCATTACCAAATCTCTAAGTCTTCACTCCTTTATATAGA
GGTGTGAAAGAGACGTTGTGAAATTGCCAGCACACCAAAGAGTCGTTGTTGAAGCTTGAT
CTTTCACCAATGATCTTTTGCCTGATTTGGTTGTTGTCCTATGAAGAACCAATTTGAAAT
CCATTCCTTATCCAAAGGAACATCTATGCAGGCGAAACCGTATTCTGGAGCTGTTTTCTT
GTCTTGTAGCGTGGACACAAAACAGAGTAGTGGAGAAGGTGGTTGTACAGTTCGTACAAA
GTACAATGTCAACGCTTTCGTCCAAATTGCAAGCACATGCCTTCAAACACCTTTGAAATG
ACCGTTGCAA
>LTR_comp3420_g2_i1
CTTTGGAACTTTTCCAACACTGGTTTTCTTACTATCACTATAATCATGTGAGACATTTTT
ATAGCTAGTATCACCATCAGGAGGAGGAGTAGTCATGTTTTTCTCAGATCTTTGACTGTT
GCACGGTTAAGTGTTACACAACAGACCAAGGCTCTAGATACCAATTGAAGGTGAGAAAAA
CACAAGAAGGGGGGTTGAATTGTGTTTTGAAAAATTCTTCGTTTCTCCTAAAAACTGAAC
ACACTGATCAGAAGCTAAGTGAGACAGCTTCTGAAGTGATGATCAGAATCTAAATGCAGC
GGAATAAAACAGAGAGAGAGAAGAAGAACGACACAAAGCAATTATACTGGTTCCTTCCAC
AATCCGGAAGTAGTCCAGTCCCCCTTGCACTTCCAAGGAGATTTCACTATGAGTAATATC
TGATTACAAATGCTCAAGCACACAAGCAAGAGACTTCCAATGCTCAAGCACACAAGCAAG
AGACTTCCAA
>LTR_comp3420_g3_i1
CTCCACTAATCCTTTGTTTGTGTTTTCGAATCCAATAGACAGCTTTTGCATTGATAAATC
TTCAATTCTTGATTCTTTGCAAATCCAGTTGATATTCAGCTTCTGGTGAAATGGCTTCTG
ATGAGGCAGCTTCTGATGATGCAGCTTCTGATGATATGACTTCTGCAGCTTCTGATGACG
CAGCTTCTGATGATGTGGCTTCTGGACCTCTTAACTTCAGAAGCACTATTCTTCAGGAGC
AGCTTGACTTCAGGAGCGCTTTTTCTTCAGGAGCAAGTTGCCTTCAGGAGCGTCCAAGCT
TCAAATTTTTGTTGTTTCCATAGCTCTTTATTTGCTCATTTAGAACCAATGATGATGTAA
CT
>LTR_comp3420_g3_i2
AATTCCACTAATCTTTTGCTGTCCTTTGATGAATTTCGATCCATGAAACAACTCTTGAAT
CCTTGAATTTCACAGATTCGGTTGATCTTCAGCTTCTTGGTGAAATGGCTTCTGATGAGG
CAGCTTCTGATGATGCAGCTTCTGATGATATGACTTCTGCAGCTTCTGATGACGCAGCTT
CTGATGATGTGGCTTCTGGACCTCTTAACTTCAGAAGCACTATTCTTCAGGAGCAGCTTG
ACTTCAGGAGCGCTTTTTCTTCAGGAGCAAGTTGCCTTCAGGAGCGTCCAAGCTTCAAAT
TTTTGTTGTTTCCATAGCTCTTTATTTGCTCATTTAGAACCAATGATGATGTAACT
>LTR_comp3420_g1_i2
GTCTTCACTCCTTTATATAGAGGTGTGAAAGAGACGTTGTGAAATTGCCAGCACACCAAA
GAGTCGTTGTTGAAGCTTGATCTTTCACCGATGATCTTTTGCCTGGTTTGGTTGTTGACC
TACGAAGAACCAATATCAAATCCATTCCAGTTGAGAGGGAACAATTCTGCAGGCTTGGTT
GTACAATCAGAGCTGTTATTTTGTCTTGTAGCAGAGACACAAAACAGAGTAGTGGAGAA
>LTR_comp3421_g3_i1
CAACGTTCCTCTGGCAGATCCATCGTTCCACCAACCAGGAAGGATAGACATGCTGATCGG
CACCGGCCCAGCACTGGCGTGCCTCAGCATCGGTCAAATCGACCTTTCCGATCGAGGTGG
ACGCGATTTGGTTCTCCAGAAAACGCAACTAGGTTGGATCATCGGGGGAAACGTCCCAAC
CGTCGCCGCCACACGCACGACCCGCGAGGCCTTCGTCGCGAACCTGAACTTCAACCTACA
GAAATTCTGGGAAGTGGAAGAAGGACCTCAGAGTCGACATTTATCAACGGAGGAGCACGA
GTGCGAAGAACATTTCGCAAAAAACGTTCGACGCGACCATTCCGGACGATACGTGGTTGC
GTTACCGTTTAACGAAAAACGGGAAGAACTCGGCGAATCACGCACGCGCGCCCTGCATCG
TTTCCGTTCGCTTGAACGGAAACTAGAACGGGATCCGGAATTGGGGGACGAATACACCAC
GGTCATGAGGGAATATATAGCGCTCGGGCACATGACGCAGGTAGAAACCTTCGACGCACC
GGGCTTCTGCCTGCCGCACCACGCCGTCGTAAAACCATCGAGTACGACGACTAAGGTACG
CGTAGTATTCGACGGGTCTGCAAAGACCAGTAGCGGAATATCATTAAACGACGCGCTAAT
GATAGGCCCTACAATACAGGATGACCTCTTTTCCCTACTCTTGCGCTTCCGTATACATGC
GTTCGTCATAACCGGGAACGTCGAGAAGATGTACCGCCAATTCCTCGTTCGACCAGAGGA
TCGTGCTTACCAACACATTTTGTGGAGAGATCATAATGGTTGCTCAAGAACTTACGAGAT
GAATGTAGTAACGTTTGGACTATCATCGGGATATCATTCATTCATTCACACATTCAGTTA
AGTCCATCGTTCGGGACA
>LTR_comp3429_g2_i1
TAAAAACTTCGCATCTATTACCGAACCACTAACGTGTTTAGCGTGCAAAAGCATAGCTTG
AGAGTGGAAGGATCTTCAGGAACATGCCTTCCAGCTGATCAAGGAAAAGCTAATATTGTG
ACCGATATTATGTATCTTCGATTCGACGCGACCGACGGAACTGCATATGGATGCAAGTTT
CCTCGGCGTTGGAGCGGTACTGTTGCAACAAGGCGAGTCAGTGGTCATGGTGGTTTGGTT
CCAGACTCGTAGTGCCGAAAGGCCGGGTTCGATTCCCTGTGAAGGTCAATTTTTCCGGGT
TGGTTTTTTCTCGCATTGCGATGCTGAAGCCTGACCCCCTGATCATAATATAAAATTATA
TATAATTAGAATAATTTCGGCGAGTTTCGGGGTAACTCGGAATTTTTAAGAAATTATTCT
CTCAAGTCGACCATCCCTACCATAGCTACTATGGTACTCGCCGCCATATCCCTACAGACG
GGATTAGGGTAAAAGGGGTTGACTGGACGCAACGGGAGGAAG
>LTR_comp3431_g2_i8
CGTTCCGTAAATCTAGTGTTAACCCTTTCGCGACGGCGCACCTGTACCATTCTTCGCTAC
TTTTCGGAACAGTGCGACCGACTTTGTCACTTTTTGCGACGGCGAGACTGACCATACTTT
GTCGTCGTTCGCGAAAGCGCAAGTGAACCATACTTCGCCACCAATGTATTTATAGCTTTA
TTTTGAGTTCGCTATTGAAATAAAATAATAATATAAAAAAACCAATAAGTGACTGCCGTA
TATACACGGCACCCGTCGCGAAAGGGTTATATTGAATATTTTATATAACAAACGAGTAGA
TTGGTAAGTTGATGACTTCCAAGTGAGAGGGGGAGCGGTACTTGCGAGGAACAAGTAAAA
TGAAATTATTAGAACACCTTAACCCTTTGCTTTGATGAACGAACACCAATCTTCCTGAGA
ACAATAGAATAAACTATACAAT
>LTR_comp3431_g2_i10
TACTTCGCCACCAATGTATTTATAGCTTTATTTTGAGTTCGCTATTGAAATAAAACAATA
ATATAATTATGATTCACCAACAAGTGACTGCCGTATATAGGCGGCGTCAGCCGTTGTGAT
GCACCAAGTGACTGCCGTATATACACGGCACCCGTCGCGAAAGGGTTATATTGAATATTT
TATATAACAAACGAGTAGATTGGTAAGTTGATGACTTCCAAGTGAGAGGGGGAGCGGTAC
TTGCGAGGAACAAGTAAAATGAAATTATTAGAACACCTTAACCCTTTGCTTTGATGAACG
AACACCAATCTTCCTGAGAACAATAGAATAAACTATACAAT
>LTR_comp3431_g2_i11
GCAAACAGCGCATCTCCGTACTTTATTTTTTCCTTCGGATGTATACGAAGTAGGAAAGTG
TCTTTCTATGAGTCTTGTAGGATTATCGTCAGTAGAGTTAAAACTTGTATTAAAAGAATG
TCGCTGTGTTGGTTTTTTGATTTTTCAGCCGCTGCAAACCAATGAGTGACTGCCGTATCT
AGACGACGTCAGCCGCTGTAAAGTAATAAATGACTGCCGTATATAAGCGGCATCAGCCTC
TGTGGACCAAAAAATGGCTGCCGTATATATACGGCGTCAGCCGCTGTGATGCACCAAGTG
ACTGCCGTATATACACGGCACCCGTCGCGAAAGGGTTATATTGAATATTTTATATAACAA
ACGAGTAGATTGGTAAGTTGATGACTTCCAAGTGAGAGGGGGAGCGGTACTTGCGAGGAA
CAAGTAAAATGAAATTATTAGAACACCTTAACCCTTTGCTTTGATGAACGAACACCAATC
TTCCTGAGAACAATAGAATAAACTATACAAT
>LTR_comp3434_g1_i1
ATAAGTGTACAAATTTGATAACGAAAAGTTGACATGGACTGTCGTTACTAGCAATTGATG
GTTACGAATAATTGTACGGGTTCTGTGATTACAAAGGGGTTGAACTTTTCCGCGTTCGTG
GTCCAACCTTGGGTCGTAGATTGTATGAGTTGGTTCTGGATTGAGGCTGGTCAGTGGTCC
TCTCCTCGCTGATGTTAGTAGGCGTTGTTTGTTCTTCGGAACATTGTACCCCTCCACGCC
TTTCAAACAGGACCATGTCATTGGAATGGTCCCTGTGTTCGCTATGATTGCTTGCATCGA
AGTTACAGTGAACAAAATTTTTAATTATTGGTGGCACAATTTCCCCTGTTCTGGGGCTCC
TGGTGAAGCAGCAGAGGCGCTTGAGCAAGTTCCAACAGCCAAGCCAGCGACAGCAATTTC
CAACGAGGATGAGGATTAGAATGGCAGCTACTACTCCTAGTGTTATCGTGTACCAACTAG
TGTGGGTAACGATAAATGGCTCCTTCAGACGATGAGTTAGTAGTCCGTCGAGTTCACTGA
GTTTTTTGCTGTTGAACTTTAATTCGTTTAAATCGATATTTGTAAGTTTTATAGGTTTCA
AGGGTGCTGCCGCTTTATGGTGTAAATAATCTGTTGCTAGAATACAGCAGTCGTCTTCAG
TTAAGTTGATTCGAGGAACGTAATGACTGATGTTTTTATTTACATAGCTTGTGGGTTCCA
ACGAATATATCATGGTATACCCCTTACAACCACTGTGTAACTGTATCAAACCAGTTTGTT
TTAGAACAATGTCTTCCATGTGATCAGTGTTGCTCTCACCACAGATGATTGTCAGTGTGG
TCGGCTTGTGTAGGGTATACAGCCACTGGTTGCTTCCGATGTAGTTCCATATCTCCATTT
CGGCACTTATTGTTTTCGTCGTGCAGTCCTGTGGAATTTGCCTTACGTGCGGTGACAGCA
GCAGGACCTCGCAGATGGACTCTTCTGTGGTTCTGGCTGAGTCTACGTTGCTACACACGT
ACTTCCCTTCCAGATATTCAACGCAGTCTCTCAAATCCGACAGGACGGCGAAGTTGGATT
TTTGTTGGGAGAGGAGTAGGTACGGGTTTTGAGGTGTAATGAACGAGAAGACAGAGGTGT
TATGATGTTGGATGGGTAGTGGAATCAGGTTGTACAGATCAAAATTTGTTCTTTTTACGA
GTGGTAGTTTTATAACAAATACTACGAGTTCGTTTATCGTAATGCTGTGAAGTTTCATTA
ATTTGTATATCTTGGGTAAATTCTTGTAGGTCGGTGTGATTATTAACTCAAATTCACCTT
TGTAATTAATCAGCTCTTCGCAAAGATCCTTTGGAGTTATTAAGAATGGAGAGATTATAT
TGTGATTTCCCAAGTTAATAGATTCTATGTTTTTATCAAAGTGATCTGAAACTTGAACGC
ATAGGGAAAGTAAGGTGGCCACTTGTTCCATAATAGTTGCTTCTAACGAGAGGTTTAATA
TGTAGTTATCTGTTTCTGACATATACTTATTAATTAGTTGCATATTGTTGTTCAAGGTGT
CTTCTGTAAGTTTTAAAGATTGAATCGAATTATTAAGATTTTTTATAGTGCTCGAAACTA
TCTGTATCTGAGATTTTAATAGAGTTTGGGTTTGTCTATTATCGTTTAGTAAGGCTTTTA
TGCTATCGGAATAATATTTGGCGTCGTCAGCGTCTGGGGTGCCGATTAGCCAATTTAAAA
TGTAAGAAGCTCCATTGATTAATCCACGTCGTTTACGCTGCTTTACATCACGTCCTATTA
ATCCGTTAAGTATTTTTTTCTTGTCATCGATATTTTGTAATTCATTTTGAACAGACTGTA
GGGTTTGCTCGCAAAGAGACTTTTGTTGTTTCGATACTACGACTTCTTTTAATAGTAGCT
TACAAATTTCTTGTGATTTAGAAAAATGGAAATCTAAAAGAGCTTTCGCTTGAGATAGAT
AAGTCATATTGACGTATGTTATGAGGTGTAGTTCGGTGTTCGAGATTTTCGCTTCTCCTA
ACTTTCTATAAAAAATTCCACTCGTGTCAGTGAGGGGTGTATTGATGTACGGAGCTTCGG
AGATGGTATTAGGAATTAGAGGAAGGAGTAGCAGTAGGATTGTCGAAATCATCTGGAACA
TAACGTTTAAGAAGGTTGGAGTGATAAGTAGTTCTTCTTTTTCCTATTTGAAGTTCTACT
GTGTTGTTAGGATGTATTTGTGTGACCTTGAATGGACCCTTGAAATTGGGCGATAATTTT
TTACTAAGTCCTACCTTGTTTCGTTTCTCGTATATACATACGAGATCATTGACTTTAAAT
TTTGTCGGGTTAATTTTTTTATCGTACTGTTCTTTACTCTTATTTTTGGAGTTAATTAGA
TTTTCCCTTGCTGTTTTAAAAGAAGTGTTTAATTTATTTTGTAATGAACGGATGTAGTCG
TCATAGGTATAGTGGAATTCTGGTTCCTTCAGTATGGAAGAGGGTAGATATGCTTTTCGT
CCAAAAAGAAGTTCGTATGGTGTTAGGTTAGTGGATCTGTGAATTGAAGTATTATAACTA
AAGGTTGCGAATGAAATGTATTCGTCCCAGTCTGTTTGATTGGCTTTTATGTAGTGTTTT
AAATAATCTTTTAGTGTTAAATGGTATCTTTCTAGACCTCCATTGGTTTGGGGGTGATAT
GGGCTGGTGCAGATATGTTTTGTTTTTAATAAATTTCCTAGGTCCCTTATTAATTCGGAC
ATAAAATCTGGGCCTTGGTCTGTCAAGAAAGTTTGTGGTATTCCAAATTGGGTAAATATA
TTCATCAATGATTTTGCAATAGTTAAAGACTCATGATTTGGAATGGCTTTGGCAAAACAA
AATTTTGTCAGATCGTCTTGTGCAGTAAGGATGAATCTATTCCCGTTCTCGGTGAGTGGT
AATGGCCCTACAATATCTATGGCTAATTTCTCAAAAGGCTTTTCAGCTGTTGTAGTTATT
TCCATAGGTTGCTTAATAGGCTTAAAATTTGTTTTGTTCATTTGACATGAGTGACACGAC
TGAATATACTTCCTTATGTCTGATTTTATAGATGGCCAAAAATATTGCTCCTTAATTCTT
GCATAAGTTTTATTGAAGCCGTAGTGTCCCGCTAGTTTACTATCATGATTTTCTTTTAGG
ATCTTTTGTATTTCCTCTGGTGTTCGCGGATTAATTCTTTCAGATGGGAACAATCGGATT
TCATTGTTAGGAAATATGAATTTTAGCATTTCACATAGTTGATCTAATTTGATATTACTA
TATTTCTTATGATTGGGAGGAATGAGAATGAATTTCTGAGTTTTTATTAACGATTTCAAT
TTCAAGAGGCACTCAAATATATTTTTATACTCTAGTCTATCAAAAGGTGAGTTCAGAGGA
TATAGAAAATAGAAAGTTTGCTTTTTATTTTGAACTTTAGACAATCCATTTAGTTCTGGT
TTGAGATTTTCTATGCTAAATTTCGACTGTACGTAGTTTAAGTATTGATTGTTCTCATGA
AGATCTTGGGACCAAAATACTGCTATAGGATCAGTAAGTGATGCTAGGGTTCCTCCTTCG
AATTCATAAGATATAGGATTTTGATTCGTGTAATGATATTTGATAAAGTCGTTGTAGGAT
GGAACTTGTTGTGTACTTATATTTATCGAATTTTGAGTGACGAGTCGAGATAGAGCGTCT
GCGTTTGAGTTGGAGGTGCCTGGTTTGTGTTTTATCGTATACTGGTATTCTTCTAATCTA
AGCCGCCATCTGACTAATTTTGACGATGGATTTTTACAATTGAAAAGCCACTGGAGTGGA
CGATGATCGGTATAGATGATGAATTCTCTGCCGAATAAATAAGGTCGAAAGTGTTCTACG
GAGTTGACAATTGCTAGTAGTTCCTTTTCTGTAGTCGAATAATTACGTTCCGAATTATTT
AAAGTTCG
>LTR_comp3435_g1_i2
ATTACTGCGGACCGTTCTACATAAAGGAACGAAAACACCGTAACCGCGCGAGAATAAAAG
TCTACGTCGCGGTCTTCGTCTGTCTCGCAGTGAAAGCCGTCCACTTAGAACTCGTGAGCG
ACCTCACCAGCGAAGCCTTCATTGCTGCACTGAAACGCTTCATCGCGCGACGAGGGTTCT
GCGTGAGCTTGCACTCGGACAACGGCACGAATTTCGTCGGAGCTAGTAACAAGCTAAAGG
AACTTCGCGAACTTCTTCGATCGGACGACCACCACCAAAAGGTGAAAACTTTCCTCGCGG
AAAGATCCATCGATTGGAAATTTATTCCACCCCGCGCACCGCATTTCGGGGGATTATGGG
AGGCGGCCGTGAAGTCGTTCAAACACCACTTGATACGCGTAGTAGGCACTGATCTATTTA
CCTACGAGGAATTCAACACCTTGATAATCCAAATAGAGTCCATTCTAAACTCCCGGCCTC
TCACACCTTTATCATCCGACCCAAACGACCTCACAGCATTTACTCCCGGCCACTTCCTTA
TCGGCGACTCACTTACGAGCCTGCGTGAGCGGGACTTTACAGACACCCCTTCGAACCGTC
TATCGACGTGGCAACATATCCAAAAGGTAAAAGGGCACTTTTGGAATCGTTGGCACCGAG
AATACCTCAACGAGCTGACCAGGCGCAGCAAATGGACCACGGGCAGCCACACAATCAAGG
AAGGCACGGTTGTCCTTCTCAAGGAAGACAACGTACCCCCCATGCAGTGGCCCCTTGGCA
AGGTAATGAAGGTACATCCTGGTTCCGACAACATTATTCGTACCGTAACAATTAAAACCG
CTACGAATGTGATTGATCGGAGCGTGAAGCGGATAGTACCACTGCCCTACCAACCGGACG
GAGATGACCACGTCCCAAAGGAGCCAGCATCCACAGACGTACCAGGTGGAACACCACCTC
CCACGCTTTAGAAATTAAGGTTGTATCTAACACATGTACTCAACTACACGTAAAAGCACA
GATTGTGAGCACACATTCACAAATACATACTCACGTTGCATCATATACTTACACACGTAG
GCTTAAGGACACGAGCGTCACTTATTGTTGATCGGCATCCTCTCAACGGGGGGAGGATGT
TCCGTAGCGTACCTTTAGTTTAATTTGTACAAAGCCATAAGCAACCCCAATAGAAGAATT
CTGTACAGATTTTGCCCATCAAATACGTTAAGAATATTTTAGTAGGATCGTTTATTGAAC
GCGAAAATATTCGGTTCTACAGATGGCTAGCAGCTTGTACGAGGGACAATACCCGAAGCA
CAAATTGCTAGCACGTTTATGGCACGCAAGCCTCCAGAGCCGTTTTTGAGGATTAGTTTA
TTTCTTAATCCGCATGACACATCCGCTTCCAACTTTCTTCGTCCTCAACGGCTAACTGCA
TGTGTCATAAACGTGAATTTCCAAAGGGTCTTAAACTCAGCCCCGAAGACCGTTACCCAG
GTCAGACCGGGACCCAAGCCTGGCGGAAATTTCATCGAATTTGTTTAAACCCCACCAAAA
CAGCTTCCACCTCCACTGACACTTCCTACTTCCGAAAAATCGCGTTTCGGACGCACGAGG
TAGGGCGTGGTCAGTGTCGCCTACCCCTGATTGGATTCTTAATTTCGAGAAAGCAGGGGA
AAGGCGGGCCTAAAGTTTTCCTTAAGGCTGAGGATGCGACAGGAAGACAGTTAAGAAAAC
ACAACAAGAAGAAACAACGCGTCGAAAAAGAAAAGTTATACTCTACGTCGCGAAAACTAA
TCTTACGTTACACTCGGCTTCAAGGGAAACATTATAATCACTTGAAGCGCACGGGAAACA
TTATCTTTCCGACGAGTCAATAACATAGATTCACCAAAGCCAACATTATCGAAACTTAAT
ATCCTTATCACCGTAAAAAGTCGTAAGGACATACGCGGTCAGTTGTCGGTCAAAGCATCG
GTCAGAGATTTACGACCTCTGACAACTTCGGCTCTCGACGCATCCGAATAGTTGCAGCGC
GCCGCGTATTACGTAAAAACATCGATAATACTAATAATATTGAAAGATGGCATTATTAAC
GCAATATTAAATATAATGTTAGGTGATTTTTTACTTCACAACTTTTTCTATCACATACTC
TTTAATTTCATGAACGAACGTTACTCGTCTCTGCTTTTTAGTGAGAAAATTTCCCGTGAT
TCGACGAAACGTCCGTGTTATCTCGTTCTCGATTAATTTTATCTTTCCATTCTATTATTT
GAGGATTGCTCCTTTCTGCGAAGACGGAAATCTTTTCTCTTCTCGCGAGGAATATCTTAG
AATATTTTAGGTTTGCACAGAAAAGGACGAGTGACAGCTTTTTCTTTTCATTTTCTGTAA
ACAAGTGTAACTAGAGAGGTAGTTGTATTTCGTTATTTACACCATCTGTTTCTAAAAAAT
GTTTCGTGTAAGATACGTCGGAATTTCGTTTGAAATTCGGAACCGTGTGAACT
>LTR_comp3435_g1_i3
ATTACTGCGGACCGTTCTACATAAAGGAACGAAAACACCGTAACCGCGCGAGAATAAAAG
TCTACGTCGCGGTCTTCGTCTGTCTCGCAGTGAAAGCCGTCCACTTAGAACTCGTGAGCG
ACCTCACCAGCGAAGCCTTCATTGCTGCACTGAAACGCTTCATCGCGCGACGAGGGTTCT
GCGTGAGCTTGCACTCGGACAACGGCACGAATTTCGTCGGAGCTAGTAACAAGCTAAAGG
AACTTCGCGAACTTCTTCGATCGGACGACCACCACCAAAAGGTGAAAACTTTCCTCGCGG
AAAGATCCATCGATTGGAAATTTATTCCACCCCGCGCACCGCATTTCGGGGGATTATGGG
AGGCGGCCGTGAAGTCGTTCAAACACCACTTGATACGCGTAGTAGGCACTGATCTATTTA
CCTACGAGGAATTCAACACCTTGATAATCCAAATAGAGTCCATTCTAAACTCCCGGCCTC
TCACACCTTTATCATCCGACCCAAACGACCTCACAGCATTTACTCCCGGCCACTTCCTTA
TCGGCGACTCACTTACGAGCCTGCGTGAGCGGGACTTTACAGACACCCCTTCGAACCGTC
TATCGACGTGGCAACATATCCAAAAGGTAAAAGGGCACTTTTGGAATCGTTGGCACCGAG
AATACCTCAACGAGCTGACCAGGCGCAGCAAATGGACCACGGGCAGCCACACAATCAAGG
AAGGCACGGTTGTCCTTCTCAAGGAAGACAACGTACCCCCCATGCAGTGGCCCCTTGGCA
AGGTAATGAAGGTACATCCTGGTTCCGACAACATTATTCGTACCGTAACAATTAAAACCG
CTACGAATGTGATTGATCGGAGCGTGAAGCGGATAGTACCACTGCCCTACCAACCGGACG
GAGATGACCACGTCCCAAAGGAGCCAGCATCCACAGACGTACCAGGTGGAACACCACCTC
CCACGCTTTAGAAATTAAGGTTGTATCTAACACATGTACTCAACTACACGTAAAAGCACA
GATTGTGAGCACACATTCACAAATACATACTCACGTTGCATCATATACTTACACACGTAG
GCTTAAGGACACGAGCGTCACTTATTGTTGATCGGCATCCTCTCAACGGGGGGAGGATGT
TCCGTAGCGTACCTTTAGTTTAATTTGTACAAAGCCATAAGCAACCCCAATAGAAGAATT
CTGTACAGATTTTGCCCATCAAATACGTTAAGAATATTTTAGTAGGATCGTTTATTGAAC
GCGAAAATATTCGGTTCTACAGATGGCTAGCAGCTTGTACGAGGGACAATACCCGAAGCA
CAAATTGCTAGCACGTTTATGGCACGCAAGCCTCCAGAGCCGTTTTTGAGGATTAGTTTA
TTTCTTAATCCGCATGACACATCCGCTTCCAACTTTCTTCGTCCTCAACGGCTAACTGCA
TGTGTCATAAACGTGAATTTCCAAAGGGTCTTAAACTCAGCCCCGAAGACCGTTACCCAG
GTCAGACCGGGACCCAAGCCTGGCGGAAATTTCATCGAATTTGTTTAAACCCCACCAAAA
CAGCTTCCACCTCCACTGACACTTCCTACTTCCGAAAAATCGCGTTTCGGACGCACGAGG
TAGGGCGTGGTCAGTGTCGCCTACCCCTGATTGGATTCTTAATTTCGAGAAAGCAGGGGA
AAGGCGGGCCTAAAGTTTTCCTTAAGGCTGAGGATGCGACAGGAAGACAGTTAAGAAAAC
ACAACAAGAAGAAACAACGCGTCGAAAAAGAAAAGTTATACTCTACGTCGCGAAAACTAA
TCTTACGTTACACTCGGCTTCAAGGGAAACATTATAATCACTTGAAGCGCACGGGAAACA
TTATCTTTCCGACGAGTCAACAACATTATAGAACCTTGATAACATAGATTCACCGATAGG
TCTAAGTGTTAAATCATTAAAAGGAATTTATCTGTTAACCAAAGTCAAGTGGTTTTCAAC
CTTAATATCCTTATCACCGTAAAAAGTCGTAAGGACATACGCGGTCAGTTGTCGGTCAAA
GCATCGGTCAGAGATTTACGACCTCTGACAACTTCGGCTCTCGACGCATCCGAATAGTTG
CAGCGCGCCGCGTATTACGTAAAAACATCGATAATACTAATAATATTGAAAGATGGCATT
ATTAACGCAATATTAAATATAATGTTAGGTGATTTTTTACTTCACAACTTTTTCTATCAC
ATACTCTTTAATTTCATGAACGAACGTTACTCGTCTCTGCTTTTTAGTGAGAAAATTTCC
CGTGATTCGACGAAACGTCCGTGTTATCTCGTTCTCGATTAATTTTATCTTTCCATTCTA
TTATTTGAGGATTGCTCCTTTCTGCGAAGACGGAAATCTTTTCTCTTCTCGCGAGGAATA
TCTTAGAATATTTTAGGTTTGCACAGAAAAGGACGAGTGACAGCTTTTTCTTTTCATTTT
CTGTAAACAAGTGTAACTAGAGAGGTAGTTGTATTTCGTTATTTACACCATCTGTTTCTA
AAAAATGTTTCGTGTAAGATACGTCGGAATTTCGTTTGAAATTCGGAACCGTGTGAACT
>LTR_comp3445_g12_i1
ATTTCTCGTTGCCAGTACGCAATGAGTTAACGCTAATTGTACCGGTAACCAATCAAATGA
TCGGATTTAAAATTTTGTGGTTTGTTTCGTTTATTTCACTTTTTATCAATTCTTCTATTG
TACGATTATTCAGCTTTTCAATTGTTGTCTTTTGTTTCTGTTTCCACTAAAAGAATTTAT
CATCTAATTCGTTTACTTTTATTTTGTAATCAGTTATTCGGCTCATTACTTTGGAAATAG
GTCTGTACAAAATGTCGGTACGTTTAGTGTTAACATACACAAATGTTCGAATCATGTAGG
TAATTCAAATGGTGACAGTGAAATCTGAAAGAATATTAATTGACATTGATTGACAAATTG
TTTTCCTTATAAGTATTATTTTAAAAAGGAGTTTAGAGATATTTTGCTTTATGATAGTAT
TTGAATGTTTCTGCCACATCAAATTTAAATAGATACAGATTAAATAAATTAATACTATGT
GTGCAATATCTAGA
>LTR_comp3445_g13_i2
ATATTGTCCGATTAATCAATTTTTCAATTTTCGTCTTTCCTTCTACTTATATTTCCGCTA
AGAAAAATCGATCATGTAACTTGTTTACTTTTATTTTGTAATCAGTGATTCGATTGGTTA
CTTTAGAAATCGGTGTGTGCACAGTGTCGGTATGCTTACTGTTAAATGGTTAAGAGTTAT
GATACCAAATCGTTAATAATTAATTCTAATATCATTCGCTTTTGTTATAAAAGAATAACT
AATATTGTACAAAACGCTGAAAATTCTCGTAGCAGTCAACGTGT
>LTR_comp3467_g11_i1
ATATGAAAATATGATTTTCTTCGCTGTTGAATGAAAAATGAACCCTTTGCACTCGAAGAT
TTCTCACTAGAAATATTCAACGTTTTCCGGTAAGATATAGACGACGTTATTTGAGATCCA
CCGATGAGAAAAGAAACGAAGTCATTTTATTGCAATATTTCACATATCGATGCATTATAC
AAAGCTTAATATTATATACGAGCTTATAATCTTACTAC
>LTR_comp3471_g1_i4
TGATGCTGCTGCGATGCCTTGATGTATCCGCTGTCCGACGGCTGCTTCCCCGGTTGAGGC
GTCCAAATCTGGCTGCTTCCTCAGTTGAGGTGTCCGATACGGCTGCTTACGAATAACTCA
GCTTCACCGGCGACGTATTATCCTACGGTGATGCTGTTGATCTGCCCTCTCCAAAGTGAG
GCTAAGATCCCAATATATGAACTGCTTTTCTGCTGCACTACAAGCTCTATACTTGCTAAC
AATTGTCAATGATGTCCAAGGAGGATGTACTAATTACAATTGAGTCACTCCTCGGTAGTC
ACTACACTGCTCTATGTTTCTATATTTGCCGAAAAATCCGGCTCGAAGGACCAAATGTCG
TGTACCTTGTTTTCCACCGACTATGTTCGGTAGTTAAACTAGTACTTCGCACGCCGAATT
AACTTTGTGCGAATTTTTAGGTTTGTGAAGTGGACTGTATTTACTTGTGAAAATCAGTGT
AGTGACTCGAAATATGTTCGATGTTCTCTATTTGCTTGGTTGACTATTTGTTTCCAACTA
TGATTCTCGACTCGCTAATCTCGACTCGCTAATCTCGACTC
>LTR_comp3471_g1_i5
TGATGCTGCTGCGATGCCTTGATGTATCCGCTGTCCGACGGCTGCTTCCCCGGTTGAGGC
GTCCAAATCTGGCTGCTTCCTCAGTTGAGGTGTCCGATACGGCTGCTTACGAATAACTCA
GCTTCACCGGCGACGTATTATCCTACGGTGATGCTGTTGATCTGCCCTCTCCAAAGTGAG
GCTAAGATCCCAATATATGAACTGCTTTTCTGCTGCACTACAAGCTCTATACTTGCTAAC
AATTGTCAATGATGTCCAAGGAGGATGTACTAATTACAATTGAGTCACTCCTCGGTAGTC
ACTACACTGCTCTATGTTTCTATATTTGCCGAAAAATCCGGCTCGAAGGACCAAATGTCG
TGTACCTTGTTTTCCACCGACTATGTTCGGTAGTTAAACTAGTACGTCGCACGCCGAATT
AACTTTGTGCGAATTTTTAGGTTTGTGAAGTGGACTGTATTTACTTGTGAAAATCAGTGT
AGTGACTCGAAATATGTTCGATGCTCTTTATTTGCTTGTTTGACTATTTGTTTCCAACTA
TGATTCTCGACTCACTATTCTCGACTC
>LTR_comp3473_g1_i6
AAAAGCCCACGCAAGGTACAGAGACGAGACACACAAGAAATTTTTTGAATAAGACACAAG
ACGGAACATAGACGTCGTTGTATACTCTCGCCGCTGACGATTATTATTGAACTAAGCAAA
AATAAACACTAAAGTATTCTTCACTGAAGTAATTAGATACAGTCCACTTTCCAAACAGTT
CGCACAAAGTTAAGTCGGCGTGCGACGTACGGGTTTCACTATAAGATTTTCGAATAGAAA
ACGCGTACACAACATTTGGTCCTTCGAGCCGGATCAACGTTCATGAGTGCTTAATAGGGA
GTTTGCGGTATAAATTCCAAATGGAAATCGAGGGACAGTGTTTACTTAGTTTTCATTGTT
AATATTTTATAGATTTTCTTAAGTTATCAGTTTTATTATTTTA
>LTR_comp3473_g1_i7
AATCAGTCATTAGAAGTCTTAGTCCCAACATTGGGTGGTCTTTCAAGAAAAACACAGCAT
ATATTCCAAGTGCTCGTGACAGTCACAGTGCTTTACATTTGGTTCTTCGAGCCGGATCAA
CGAACCACATGACTGCAACATTTGGTCCTTCGAGCCGGATCAACGTTCATGAGTGCTTAA
TAGGGAGTTTGCGGTATAAATTCCAAATGGAAATCGAGGGACAGTGTTTACTTAGTTTTC
ATTGTTAATATTTTATAGATTTTCTTAAGTTATCAGTTTTATTATTTTA
>LTR_comp3487_g14_i1
GTCACAGTTGAAAAATAAATCATAAAGCAACGATTCGCTTTGAGAATCGCTTCACTTTGC
TTCGAATTTCCTAGAACTGTCGAACTCATTTTACAACAGAAAACACTTCTCCCGATAAGG
GCCAATCTTTCACTTCTCCAGATGACGCGACCGGGTTGAACTGTCAAAGTACTGAATTCC
ACGTGTCACTAACCGCGAGCAAAAACAGAAACCTCGGTTCACGTTCAAGGCAGCCGAACG
TGGAAAATAACCGAACGCTACGTGAGAAACTTTTAATTGCTCCGCTTGTTAAGCGATCGA
CTTTCGCTCGTCGCCGCGCACCCACGCGGTATGCTGTCATGGAAATTAAATCGGGCTCTA
ACTTAATATGTCACGTCACGGGGGAAGATCGGTAACCGACTCGCGCGTTTTCCCTCTGAA
ATCCGACCGGAGGGAAGAGGAAATCGGTCGGAAGCGTTCCATGCAGGCAAGGTCGACGCA
ATTATCGTTGCGAATATTTTCTTGGAGACCGCGAGAACGCTGCAAATGTTCATGCCAGTG
TAGATTATTCAGATCACACCGAAATCTGCATCTTCG
>LTR_comp3490_g11_i1
TAGAAACTGAATGACGCTTTTCTACTTTTACAAAGACAAATTTCAACCCTTTGCGGACGG
AGGTTCTTTGAAATGTAGAAAACCTTCGACGGATGAAGCTAAATTATATATTGGTTGCTT
AAATAATAGTAAAAACAGAAACTACATGCTAATCTCTTGCTGTCCGAGTAATCAAATCAT
TCGCGACTCATTCTTCCAAACATGAACGTTTCATCTCGCCGAAAT
>LTR_comp3491_g1_i4
ATTAGTACTAACTGAATCAGAACTAATTCGGATTTTCTAATTGAACAAAATTCTTTTATC
ATTGACGACATAGAATCGGAAAGATCACAAAATGATGAGAACTATTTTTCTGATAAAAAC
AAGTCTAAACGCGCTATAAATCAGATAATTAACTTACTATATAACGCAGCTTCTTTGAGA
TTCAGTAAGAGTGTATAGTTCATATGTATATGCCCTATATTTAATATTTTCAGAAGGGCA
GTTTAACAGAATGAAAAGAGATCAATTTTATAACACCTATTTATATTATGTATCCACAAT
AATTCACTATGTTTATTTTGTTTTCTTTTCATTCTTGTTTTCATTTCGTTTACATTAACG
GGCATCGTTTGAACATGCACGTAGGACACATATACAGTGGGTCACAAAATTATTCGCTCA
GTCGATAGTGCGGTAAAGATAAATGAATTAACCATACAACGAAGAACTTTTTCAGATTTC
TTTTAATGGATATACATTATTTACAGTTCAGTGTAACAAAATGGTATAAAAAAGTATAAA
GTTTTGATTTATAATTGCAAAGAAAACGAATTGTAACAAATGTCTACACTTTTTCACGTC
ACAAAATTATTCGCCCATGTTGCGAACCAACTAAAACAAATGCTATCAATGTGGCTTTGG
TGGGCATTTGTTTATGCTTTTCGCTAAAAGTAGTCAGTATAACGTAGACAAGTGACTAAA
AAGCATTGATCTTGATTTGTAACTTCTTGTCTCAACAATTCAATATTATGGGTAGAAAAA
GTAAAGAAACAAATCTGGAAGTTAGAAAAATCATTATTTTTCATTGGAAAAATGGAAAAT
CCATTAGGGACATTGCGGGAATTGTTTGCAAAAGTTATTCTACAGTGCGATACGTTATAA
AACGATATAAAGAAGAAGGACGAGTAGAAAATAAAACAGGCCGTGGTAGGAAAAAATTAT
TAAATTCCGCGGAAGAGCGATTTATAGTGAGAAAAGTTAAAGAAGATCCAAAAATAAGTG
CTCCCCAAATCAATTCACTCCTTCAAGGCTTTTCTGAAAAAGAAGTTTCCCATGAAACAG
TTAGAAGAACACTGCGAAAGAATGGGTACAACGGCCGCGCAGCAAGGAAAAAGCCTTATA
TAAGTGAAATGAACAGAAAAAAAAAG
>LTR_comp3491_g1_i5
ACTTTACATCAATTCCTATATTGTGTCCGATCAATCATTTTTTCAATTTTCGTCTTTCCT
TTTGTTTGTATTTCCACTCAGAAAAATTTGTTATCGAAATTATTTTTCACTTTGTATCCA
GTGATTTAACTGGTCATGTTAGGAAGAGCTACAGTGGATCACAAAATTATTCGCTCAGTC
GATAGTGCGGTAAAGATAAATGAATTAACCATACAACGAAGAACTTTTTCAGATTTCTTT
TAATGGATATACATTATTTACAGTTCAGTGTAACAAAATGGTATAAAAAAGTATAAAGTT
TTGATTTATAATTGCAAAGAGAACGAATTGTAACAAATATCTACACTTTTTCACGTCACA
AAATTATTCGCCCATGTTGCGAACCAACTAAAACAAATGCTATCAATGTGGCTTTGGTGG
GCATTTGTTTATGCTTTTCGCTAAAAGTAGTCAGTATAACGTAGACAAGTGACTAAAAAG
CATTGATCTTGATTTGTAACTTCTTGTCTCAACAATTCAATATTATGGGTAGAAAAAGTA
AAGAAACAAATCTGGAAGTTAGAAAAATCATTATTTTTCATTGGAAAAATGGAAAATCCA
TTAGGGACATTGCGGGAATTGTTTGCAAAAGTTATTCTACAGTGCGATACGTTATAAAAC
GATATAAAGAAGAAGGACGAGTAGAAAATAAAACAGGCCGTGGTAGGAAAAAATTATTAA
ATTCCGCGGAAGAGCGATTTATAGTGAGAAAAGTTAAAGAAGATCCAAAAATAAGTGCTC
CCCAAATCAATTCACTCCTTCAAGGCTTTTCTGAAAAAGAAGTTTCCCATGAAACAGTTA
GAAGAACACTGCGAAAGAATGGGTACAACGGCCGCGCAGCAAGGAAAAAGCCTTATATAA
GTGAAATGAACAGAAAAAAAAAG
>LTR_comp3501_g6_i1
ATACGAAACCTTCAGCAGATGAAGCTGAATTACTTGTCAATTGCTTAATTAATATAAAAA
CGGAAACTACATACTGATATCTTGCTGTTCGAGTAATCGAATCATTCGTCCATGACTTAG
TTTTTTAAATACATTCATCTCGCCAGACTCGGGTTAAGTCCAGACAAACAATTCTGTTCA
ACGTTGATCGAATCAATGGATTACTCGCGTAAACTCCGAACAGAGTGATACAGGCAATTA
TGAAACAAACATTCCAAATGCGGAATGCTAAACGTTGCTAACAACCTCAGACGTTAAAGC
AGCAGCGTAAATATGCAGTAAGAAAGAAAAAGTTCCAAATCTAAAATAGAAGCAAGATCT
TCGCTCGGCGTGTAAAGCCACGGGTTCCCCGAGATGCTCTCCGCGCTTCGAATATTCTCT
TATCTCGATCAGGTTCGCCAGCACGCTAAGCAGACTAAAACACGACTCCGAGCGGATTGC
TCAAC
>LTR_comp3514_g4_i1
GAGCGATACAGCAAGTTGGGCCATCAGGTTGAGCAAAGACTCCAGGTTCTGGTCCAACGA
TGTGGGGCTAGCGCCGTATGCGGGCGGTACACTGGGAGTTGCGGCCTCGGCTACGTGGGA
CCGTCGGGTCAGCGTCTCTGCTATGGCGTCCGCCAGTTCGGCCACTTTATCCAGTTCTGT
ATCCCGTTGCGTCTCCAGGATGACTTGGATCTTGGTCGGTAAACGACCCAGCCACAGTGT
CCGCAAAACATTGTCGGCGATCGAAGTGCCCGCTATGCCTCGCAGGTGCCGCAGGAACTG
CGACGGCTTACGGTCCCCGATTTCTTCCAGTTCCAGTAAGCGTCGCGTCTTT
>LTR_comp3514_g6_i1
GGAAATCCAGTGGCGTAAGGCAGCTTTTCGGCCGCCACATTACCCCCCTGCCAGTAATTG
ACTTAATTACGAAAACAAAAAAAAAAGGAATATGGAACGCACGCAGTGTGGTACTTATTG
CTAAATGCGATTACCCATGGTTAGGGTGTTATCGCGATCGCTGGTACACTACAATTAAAC
ATAATTTGCTCTAGGTACCCGTTTCGCACTACGCCCGGTACAATATGGCGTTCGTAGAGC
GTCACTCGCTTGTGACTTATCGGAGGCCCGCCTGGAAACGTTCCGGAAAACGCACACGCC
TGCCAGAACGGGTAACGCGCTGTGTGTGCGGTATAATGAGGGGCACGCTTGCTGTAGTCG
CTGGTGGATCGGAAGGTTGTGTATCTTCTTGGCCAGAACCGTTTTCTGCCAAAACGTACG
CGGGCTTTAACCTGTCTATGGTTACTGTGATGTGTTTGTCTTTAATGTTAAGCACGAAGG
TTTTCGGGCCTCGATGTACTACCGCATACGGGCCTTCGTATGACGGCTGTAAAATTGGTT
TAGTTGCATCGGTCCGCACGAAAACATGTGAACTTGTGTTTAAATCTTTGAAAACGAAGG
TGCGTTTCGCGGTATGGTGCGTACCATCTCTCGGGCCCATTTTGGCAAAATGACTGCGGA
GGTTGTTTACAAAATCCCTGTCATTTTCTCCCCTCTCTAATGGGCACGTGGTCAAAAATT
CGCCGGGCAATCGTACCGTTTCGCCGTATACTAATTCGGCCGACGTTGCCCGCAAATCGT
CTTTCCACGCGGCTCGGATCCCGAGCAAGACCGACGGAAGAATTTCTGTCCATCGATTTG
TCTCGTGGCAACGGATAGCGGCTTTGAGTTGCCTGTGGAACCTTTCTACCATTCCGTTGG
CCGAAGGGTGGTATGCTGTTGTGCGCAAATGTTTTGTGCCGGTTAGTTGATTAAGTGCGG
CAAATATTTTAGCTTCGAATTGTCTTCCCTGATCTGTAGTAATCCGTAGCGGAACACCGA
AGCGTGCTATCCAACCGTCATAAAACGTTCGAGCTACGGTTGAGGCCTCCTGATCTGCCA
TGGGAAACGCCTCAGGCCAACGCGTGAATCTGTCTACGCACGTGAGGCAATACCTGAACC
CTTCGGAAATTGGTAGAATCACAATGTCTATATGGATGTGTTCGAACCTCGCAGTAGGTG
GAACAAAAGGGCTCAGCTCGGATGCTACGTGCCGTGTGACTTTTGTTTTCTGACATTGAA
TGCAACACCGCGTCCACCGGCGTACATCCTTTTTAATCGACGGCCAAACATAACGTTGAG
TCATGAGGTTGACCGTCGCATTGATGCCTGGATGGGCTAATCCGTGCGTAACGGTGAACG
CGGTGTGCCTAAACGGAGGAGTGAGGAAGGGCCTTGCTGCGTTTGTCGAAACGTCGCAAA
ACACTTCCGTAGTCGAGCCAGGTAATCTGATTTTGCGTAATTGTAGACCCGATTCCGCGT
ACAGAAACCGCTGGATTTCGGGATCGTGGGCCTGTGACTGCGCTAATTCTTCGTAATCCA
GCGGTGTCTGTACGGTCTCAATCCTCGACAACGCATCGGCAACGACATTATCTTTTCCGG
ATACATGCCGGATATCTGTTGTGAATTGTGCTATGAAATCGAGGTGCCTGAATTGTCTTG
GGGAACATTTATCTAGCTTTTGTTTAAACGCAAATGTGATTGGTTTATGGTCGGTAAAAA
TGGCAAAGGTTCTACCCTCGACCATGTGTCTAAAATGTTTTATGCTCAGGTATATGGCAA
GTAGCTCGCGGTCGTATGCGCCGTATTTATGCTCTGCTGAAGTTAACTTTTTTGAAAAAA
ACGCTAATGGTTGCCAGTCGTTGCCGATGCGCTGTTGCAGGACGGCCCCGACCGTGTAAT
CGGAGGCGTCGCAGGTAAGCGCTAACGGTGCGTTGGGTTTGGGATGTGATAATAATGTAG
CCGCCGCTAAATCGTTTTTGCAGGTGTCAAATGCCTGCCGCGCTTCTTCCGTCCAGGGTA
CCGGTGTTTTACCCTTTATATTACCCGCGAGCAGGTCGTTTAAAGGGGCCTGGCTCTGCG
CAGCGTTAGGGATGAATCGACGGTAAAAATTCAACATCCCCAAAAACTGCCGCAGATCCT
TGGCCGTCTTTGGAAGTGGGAACGCTCTGATTGCCTCCACCTTACCGGGTAGAGGTTGTG
TCCCGTCTTCCGAAACCCGATACCCTAGGAATTCTACCGCGTCCTTACCAAAATTGCATT
TCGCGGGGTTTATAACGATACTGTGATCTCTAAGCCGCTCAAACAACATTTGTAAATGCT
GGAGGTGTTGTTCCCGTGATTCTGATGCGACGAGAATGTCGTCGATATACGCGTAGCAAA
AGTCGTATCCGCGAAGAACCTCGTCTATAAACCGCTGAAACGATTGAGCGGCGTTACGTA
ATCCGAAGGCCATGAACGGGAATTCGAATAGGCCGAACGGCGTTGTGATTGCCGTTTTCG
CAATGTCTTCGGGGGCGACCGGGATCTGATGGTACGCACGCATTAAATCGATGGTCGAAA
ACACGCTCTTACCCTGGAGATTTTGCGCAAAATCTTCGATATGCCGCACAGGGTAACGGT
CCGGAATGGATCTCGCATTTAGTGCCCTGTAATCGCCGCAGGGCCTCCATGCGTCTTCTC
CTTTCTTCGGGACCATGTGTAGCGGGGAGGACCAGCAACTCCTGGACGGACGCGCGATGC
CCATCCTCATCATGAGCTCGAACTCCTTTTTAGCTGCTTCAAGCCTGTCCGGAGCCAGCC
TACGTGGTCGACTGGAAACAGGTGGTCCGGTAGTCGTCCTGATGTGGTGTACCGTCGTGT
GCTTGACGACGGCCGGCATTCCCCCAGGCCGAGTGATCTCCGGGAACCTGGCGAGGAGCT
CGTGGTAGACCGATCCTCCCGCCACCGTCTTGACGGAAGGTGCTTCGCTGCTGACTGGCC
GGCCTCGCGTAGACAGAGAGGTCGTGGGGTCGATCAGTCGATGGTTGCGGATGTCTACCA
TCAGATTGAAGTGGGCCAAAAAATACACTCCAATGATGGGTTTTGTGACCTCCGCTACCA
CGAACCTCCACGTGAATTCTCGACGCAAGCCGAGGTTCAGGGTGAGCGTTACCATGCCGT
ATGTAGCAATGGTCGTTCCGTTCGCCGCGGTCAGCTCGTATGTCGACTTTTCTCGCGGTC
CGCGCAAGAATCGCCGCGGAAAAACGCAAAGGTCGGCTCCCGTGTCGACCAGGAATCGCG
TCTTGGTCCTGACATCCGTGACAAACAGACGGCGTGACGCTGTTTTGGAATCGTTGGCCG
TCATCAACGATTTCCCTGGTCGTTTCCCTGGGTCGACCAGTTGCAGGGCAGCTCGCATCG
CCGCGCGTTCGTGCCGAACCGCCAGTGGTACCAGCATTTTCCCTGGTAATCTCGTCCCTC
GTCGCTCCGCTCCACGGATCGTGAGGACGAACGCCATCGCCGACGAGAGACGGATCTGGG
GCGCCGTTGCCACCCTCGGCGTGGGGGCCGCTCCTCCGCTCTGAATTCATGCCGGATAGC
CGATATTTCCTGCCGGAGCGATAGCGCAAGTTGGGCCATCTTTACGTTGAGCAACGACTC
AAGGCTCTGGTCGGTTGGTGTGGGACCGGCGCCGTATGCGGGGGGTACGCTGTGAGTTGC
GGCCTCGGCTACGTGGGACCGCGGGGCCAGCGTCTCTGCTACCGCGTCCGCCAGTTCGGC
CACCTTGTCCAGCTCGGTGTCCCGTTGCGTCGCCAGGATGCCTTGCAGGTTGATCGGTAA
CCGACCTAGCCACAGCGTCCGCAATATGTTATCCGCTATGGAATTTCCTGCTAACTCTCG
CAGGTGCCGCAGGAACTGCGACGGCTTACGGTCCCCGATTTCTTCCAGTTCCAGTAAGCG
TCGCGTCTTT
>LTR_comp3518_g5_i3
ATGATTGTATACAAACTTGTCACATAAATATAATATTAAATATATTTCAACTAAAATGTT
TTATTTTAAACTAATATAGACATCATAAAAAAATATTATGCCCGAGGATGCGACTCGCTC
GGTAGAGTAATGTTCAGCCAGGTATTTATTAAACTAATTCCTAAAAAAATAAATTTATTG
CTTTGTTGTGTTATGCATCTTAAACTATACACCCTTTCCTTGATAGTTATGATTTTTGCA
TTATTTTAATCATTGTAAGGCATACTCCAGAAACAAAACGCGGCCTGAACTAATAGTCTT
CAAAAAACGGTCTGGCAAGGAACGTGTCAATGCGCGTCGCGGACCGTCATTCTTCCCCAG
CTTCGAGTTCCCGCTGAATTTGCATAGTCCCTCGCGTGAAAGTATTCGATCGGCTGTTCG
AGGAAACTGGCTTTTAGAGAAATGAAATGTTAATGACCGCTGAGGATTTCGCGTGAGAGC
TACTCACGAAATTCTAGAAAGAGGA
>LTR_comp3531_g2_i2
TTCGAATGACCGACAGCTGATCGGCAGTTCTAACGACAGCTAGTGTTGATGTTTCTTTTA
TCATTACGCAACACTTTTATAATTTGATTTGGACCGTAATACTTCGCTGCTAGTTTAGAG
CCGAGTGCAGTTTGTGTTCTTTTTATAGCGACTAGATCCCCGCTGTGGTACAAATTTGGA
TGTTTCCTCTTTTGATTGTAATTACGTCTGTTTTCTTGTTGGATCTTTGCTATGTTTTCC
CTAGCCTGAACACGCATCTCCACTCATTCTCAATCAATTCTTTTATTTTGGGATTATGGT
GCGATGTAAGGTGTTATTGAGGAGACAGTAAAACACAAGTCACACCCACGTTTTGCGTTC
GCGGAAAGGTCAAAATCTATTTATTCGTATCTTTATACAGCGCGCTTGGACGATGTCTTT
TTGGAGGAACGCGTCGGCGATGCTCCAGTTAATGGAATCTCTAGATGAGATCGGAAGAGC
ACACG
>LTR_comp3531_g2_i3
TTCGAATGACCGACAGCTGATCGGCAGTTCTAACGACAGCTAGTGTTGATGTTTCTTTTA
TCATTACGCAACACTTTTATAATTTGATTTGGACCGTAATACTTCGCTGCTAGTTTAGAG
CCGAGTGCAGTTTGTGTTCTTTTTATAGCGACTAGATCCCCGCTGTGGTACAAATTTGGA
TGTTTCCTCTTTTGATTGTAATTACGTCTGTTTTCTTGTTGGATCTTTGCTATGTTTTCC
CTAGCCTGAACACGCATCTCCACTCATTCTCAATCAATTCTTTTATTTTGGGATTATGGT
GCGATGTAAGGTGTTATTGAGGAGACAGTAAAACACAAGTCAAAATCTGATATTTATTCG
TATCTTTATACAGCGCGCTTGGACGATGTCTTTTTGGAGGAACGCGTCGGCCGTACGACG
CTCCAGTTAATAATGGAAACTCTAGATGCCGTTTTTCTACTGTTCCAATTGAAAATCGGA
TGTCGCTCGTCTACTGTTGTATGCCGCGCGCCGAAAATGCTTAAATGCCGTCCGCCGCGT
TCCTCTGTTTTACCGGGGTTATATACCCGGTCCAAGACAGAGAACCGCGGACGGACAAAT
CAATTAAAAACGTGGTGACGAAGTCGCTACACTACGACTACTATTAAAATAGTA
>LTR_comp3531_g11_i1
ACAAAGTAGTTAGATCGATCATAGATCAGAAGGAAATCATAGGGCAAGCTGTTAACATTG
AAATGAGGCAATAGAAACTGACATTTATATTTCAGTTTCGCAATCATTTAAGGCAAAGGC
TCCAGGAAATGACCTGCTATCAGTAGTTGACCGTTTTTCAGGAAAACCTAAAAAGTATGA
ATTTTAAAAGTAATGATCTTCCGAAAAAGGCAAGATAGATATGCTGCAGTATCTATCGAC
CCAATTACGAAACACTTTTACCCGAATGAAATTGTTTATCGTAAAAACTAACAATTTATT
TCATTGACGTTGGTTGTATAC
>LTR_comp3531_g2_i7
TTCGAATGACCGACAGCTGATCGGCAGTTCTAACGACAGCTAGTGTTGATGTTTCTTTTA
TCATTACGCAACACTTTTATAATTTGATTTGGACCGTAATACTTCGCTGCTAGTTTAGAG
CCGAGTGCAGTTTGTGTTCTTTTTATAGCGACTAGATCCCCGCTGTGGTACAAATTTGGA
TGTTTCCTCTTTTGATTGTAATTACGTCTGTTTTCTTGTTGGATCTTTGCTATGTTTTCC
CTAGCCTGAACACGCATCTCCACTCATTCTCAATCAATTCTTTTATTTTGGGATTATGGT
GCGATGTAAGGTGTTATTGAGGAGACAGTAAAACACAAGTCAAAATCTGATATTTATTCG
TATCTTTATACAGCGCGCTTGGACGATGTCTTTTTGGAGGAACGCGTCGGCCGTACGACG
CTCCAGTTAATAATGGAAACTCTAGATGCCGTTTTTCTACTGTTCCAATTGAAAATCGGA
TGTCGCTCGTCTACTGTTGTACGCCGCGCGCCGAAAATGCTCCGAAAATGCTTAAATGCT
TTTTCGTGTTGGATTTATTAAAACTTGTTTTCTTCATTAACGAGTAGTGACTATTCGTCT
AATTCTGAGTCAGTTTTCTGTATCACTTTTGATTGTGGCGGAGAATCTTTATTATAAAAT
AATTTTATTCTTATATGATCGGTAAAAAGATTATTTTCCTCAGTCATTACAAGAATTTAA
CAATTGCTAAGAATTCATTT
>LTR_comp3536_g5_i1
CTATTGTCATCTCCAGCATGACATACGAGTGCAAAGGGTTAAAACGGTCGCAAAATAAAG
TCGGACTTATTCGTGCCGAGATTATCGGTATTGTGCGCGACTATTTTTAGAGCACATGCA
AATTTTCGCAACTCTTGCTCTTGCTGTCGTTCAAGCACATCTTGCTCAGTATTTCCCGGG
CGAGGTTTAAGCTGAGAGCGGTCTTGCTGCCGTGAAGCTTCGAA
>LTR_comp3539_g1_i1
AGCTGTAGCACTTAATTCAGGCTCGCTTGAATCAAATGAATGGTATTTGGACAGTGGTGC
AACAGTACACATGTGCAAAGATGGAAACATGTTCAAAAATCTTGACGAAACGAAGAAAAG
CAAAGTTTGCACCGCAACAGAAAGCAGCACAAGTTCTCGAGGAATAGGAGAGATACAAAT
GAAAGTAAATTCAAGAAACAATTCTGAAAACAATATAAAATTAAAAAAGGTTATGTGGGT
ACCAGAATTTAGGAATAACTTATTATCAGTATCGAGCGTCACTGAAAACGGGTACTCAGT
CAACTTTAACAAACACTCAGCTACAGTAAAACGCAAAGATGGGTCTGTTGTCTTAACCGC
ATACAAACAAAATGGACTATATGCAGTGAAAACTGGAAAGAATCAACAAGCCATGCTAGC
AGAAAAAGACGACGACAAGCTTATAAGATGGCATAAGAGGCTCGGTCACTTAAACTTCAA
AGATTTAAAACAATTGTTAAACAAAGAAATGGTAATGGGAGCGAATATAAATCAACAAAA
ATTATCAAACACACAGAGATGTGAGATATGTGATTTAAGTAAGGCACATCAATTACCATT
TAAAGAATCGAATACAATAGAAAAAGACACTCTAGGATTGATACACACTGATATATGTGG
ACCAATGAGCACACCATCTCTAGGGGGAGCAAGGTATTTCGCAACCTTCATTGACGACAA
AACAAGATATACAGAAATAGCGATTCTTAAGGAAAAATCCGAGATATTTAGTGCTTTTAA
AAAATTCAAAACTCGGGTAGAAAAGCAACTGGGAAAATCAATAAAGAAATTACGGAGCGA
CAATGCAAGAGAATACTTGTCCAAAGAATTTTCTGAATATCTCGAGAAAGAAGGAATAAC
GCGGCAACTATCTACCGCGTATACACCTCAACAAAATGGCATTGCGGAACGTGCAAATCG
GACGATAGTAGAGATGGCACGCACTATGTTGACTCAATCGGGACTACCAATGAGTTTATG
GGCA
>LTR_comp3539_g2_i1
TCGCACTTTGGTTGTCTCAAAATATATTTACTTTATTAACCATTAAACTAGTGAGTTTCG
TATATGATAAAAATCTTTTTAAATATATAGCCTCTTTCACAGCCTCTGACATTGCCATAT
ATTCAGCTTCCATTGTTGATAAAGCTACAGATTTTTGCTTTTTCGAGGCCCAGCTGATTG
GCCCCCCTGCTAATATTGCAATGTACCCAGACCGCGATCTTCTTCCATTTTCATCAGCTG
CCCAATCTGAGTCGACATATAATTCAACTTGCTTATTGCTGGCTAGATAAGTAATTCCAT
AGTTAATTGTACCCTTTAAGTATCGAAGGACATGTTTCGCTATTTTCCAGTGGTAGTGAG
ATGGTTTGTCATTATATTGACTGAGAGCATTCGAAGCAAATGCTATGTCAGGTCGTATAG
CGTTCGACAAATATATTAAAGTTCCTACTAAATCTCTATATGGAATATTTTTCAGATCAC
CTTCTTCCTCATTTGAGTTATTAAATTTTTCATTTGGCATTAATGGGGTTTTCATCGGTT
TGCAGTCTTCCATGGCAAATTTTTGAAGTGCCTCCATTATATACGCTCGTTGGTTCAGTT
TTATACGGCCAGTATCACCCTCTCGTTCAACGGATATTCCAAGTATATTGGTTACTTTTC
CCAAGTCGTTTATTTTGAACCTTTCTTTCAATTTTTGTTTTATTTCTACAGGCTTCTGTA
AATCTTTGGATGCTATAAGAATATCGTCTACATATATAATTAGTATAACGTCACTTCCTT
TCCTACTATCTACATAAACACAAGGATTGATTTGACATTTGTTTAAACCAATATGCGATA
GATAATTATTTAAAGTACAATACCATTCCCTGCATTGCATTTTATTTTCGACTGCTGCTG
CAAGAAGAGTGCGTATAGTTTCAAGTCGTGCCACGGGTGCAAATACTTCGTCGAAGTCTA
TGCCCTTCTTTTGTTCATTTCCTCTGGCCACAAGTCTTGCTTTAAATTTGTTTAGAGTAC
CATCAGGATTTGTTTTTATTTTAAATACCCATCTGTTCGTGAGTACTTTCACGTCTTTTG
GCTTGTCAACTAGTTCCCATGTTTTGTTATCTATTAGTGAATCGTATTCTTTCTGCATGG
CTTCTAGTCACAAAGACTTTTCTTTACTCTTCATTGCCTGTACCACTGTTTTCGGTTCAA
TGTAGTCAGTTTCGACAGTGTTTGCCATGTGATAAATTTTCTTAGGTCTTCCCCGAGCTC
CGGTTCGGTCCAGTTTGGGGCGGCCTCTTGCCCTTCTGTAGAGTAGTGACTCATTGTTTT
CTTGCCGTTCTTCGTCATCTGAAATCTCCTCAGTACCATTGTCTGATTCCTCTGCTTCAG
ATGTATGCGTGTTTTCGTCTTGGATATCAGGAATTATGTTGGATTTATTTGATAAAGAGT
GCACAATTGTATTATTGTTTTCGGTTTCTTCATTATTTATATTTGCTTTATTTTCGGTAT
ATTCATGAAATCGAACGTCTCTACGTACCATTATGGATTTTGTTCCTCGTTCCCACAATC
TATATGCTTTTGATTCTTGAGAATACCCTACGAGGACGTATTCTTTACCTCTAGGCATAA
ATTTATTTATTTTTCGCCCCTTTTCAAATGCGATCACTTTGCTGCCGAATATTCTCATGA
ATCCAATGTATGGCTTCTGACCCATCCATGCTTCATACGGTGTTGAATTATTAAGTTTTT
TCGTTGGGCATCTATTTCTTATGTATACCGATGTGTTAACTGCTTCTGCCCATAAACTCA
TTGGTAG
>LTR_comp3539_g3_i1
ATATTTTGCGACAACCAAAGTGCGATTCAACTTAGTAAAAATAACGTATTTCATAATAGA
AGTAAACATATAGATATACGCTACCATTATTCAAGGGAGATGCAAGAACGTGGTGAAATA
GAATTGAAATATCTTAAAACAGATGAAATGGTTGCTGATATGTTAACTAAGTCGATACCA
AAATGTAAAGTAGAAAAATTTATAGATTTGTTAAAAATGCGAAATTAATGTATCGATTAA
TTACTGTAAGCGAAATTAACTTGAAAGAAATGTATTTAGGGGCACTTTGAAAGGGGGAGT
GTTGGAAAATATAGCTTATGATTATTCAAAGTGACCACCATGAATGGGAACAACATAGAA
TATATATATG
>LTR_comp3539_g2_i2
TCGCACTTTGGTTGTCTCAAAATATATTTACTTTATTAACCATTAAACTAGTGAGTTTCG
TATATGATAAAAATCTTTTTAAATATATAGCCTCTTTCACAGCCTCTGACATTGCCATAT
ATTCAGCTTCCATTGTTGATAAAGCTACAGATTTTTGCTTTTTCGAGGCCCAGCTGATTG
GCCCCCCTGCTAATATTGCAATGTACCCAGACCGCGATCTTCTTCCATTTTCATCAGCTG
CCCAATCTGAGTCGACATATAATTCAACTTGCTTATTGCTGGCTAGATAAGTAATTGTTG
GAAAATATAGCTTATGATTATTCAAAGTGACCACCATGAATGGGAACAACATAGAATATA
TATATG
>LTR_comp3539_g4_i3
GTATGGTTTTTTATTTGATAGCAATGCTTCCTCGTTTGAACATTTTGCTCCATCATTGTC
AGCTTTTCTGATTTCCTCTTCTAATAGTTTAACTTTAAGCTCGTCCATTGTTGGCATTTT
TTCTCTTGACTCGATAGCAATGCAAAAGGTTTCGTAATTCATTTGGCAGTGACGTAAGTA
ACATTATTGGTATGGTAGTATCTGGTAATTTTACACCGGACTCCTCGAGCTGTTCCACCT
TTTGGACAAAATTGTCTATGTACTGCGCCATGCTTTGACTTTCATCCTTTTTCATTCTAT
ATAATTGTTTATATAGAATACACTGTCGCATGGGGCCCTTGGACTCGTACACCTTATTTA
ATGCATTCCATGCACACTGCGACGTTTCTGCACGTTTAATGTGGTTGTACTGGCTTTTAT
CTATACTTAAAATAATTAAATCGAGAGCCTTCTCGTCCTTTATATTCCACTCAATATCAT
TTGTACCTGCCCTTGTTATTGTTCCGTTCACATATCCCCATAGTTCATTAAATCGCAATA
TGCTCTTCATTTCTATTTTCCATGATTCGTAGTTTGTATTATTTAATTTTTCGCAGCGTT
GCGTGGTTATAGTATTCATGTTTCTTTATTTTCTCGAACACGTGGTATTCGCTAACCTCA
CTTTTTGGACTATGATACTATTTTAATTTACTGGGCCCATAACCTGTTAAGGTTTTATTT
GGGTACATGTGTACATTTATTGATTGGAACAGTTTATATAGATATAATTTAATATTGAGT
TATTATGCTAACAGTTATAAGTAACATTTTTACATAACGATGTTCTTGGCGCGAAAACAC
TAAGCACGTGTTACCCCATACCCAAGCACAAGCGGAAGGGAAGAAA
>LTR_comp3546_g9_i3
TTACGTAAAAGAATAAGGAATTAGATTCTGTAGTTTTACTTTGGAGTTGTGTTATACATA
TGTAAAAAGTTACATTAACGTAGGATTAAGAATTAAATAATAGACTAAAAATCCCCCACC
ATCGCGGGGCTGGCGCGCAAAGTGTTAATAAAAGAAATCAAGGTTCCCATAATATTGTCG
AGTGCAAACGGTTAAACAAGGAATTGTTTGTAATGTTGATGTCAAGGAGGTCGGGACTAA
GGTGGGGACCTTCGACCTTATAAGGACAGTCTTGACAGTGGAGGGCTCAGTTCCTCGCGA
ACTCTTCAACTGCGAGGATGGGGGAGGACCAGC
>LTR_comp3549_g16_i1
GTGTGCTCTTCCGATCTATGGTACTAATTTTACAAGTGCCGCTAACGCTCTTATAGAATT
AGACTGCGAAAGAATATTTAAATATAACGCGGCGCATAGAATCAAATGGGTCTTCAACCC
CCTTTTAGCACCTTGGCGGGGTGGATGGTGGGAGAGACTTAGGAATATTAACACGTTCCG
TGCACGGAAATTTCGGTCATATTTTGCTTATGAACTGTATTGATTTTTTAAATAAAATAT
TAAGTTATATTCAAGTTTTCTTTTAATTTTATATATTTTGATATCGTTTCTTGATGTTTT
CGGTGCTTTGTAACGTATACAGCTATTCTTGACCACGTGTCCCTTAAAAATATTCCGTTA
CAAAAATTAACGTGTACCACATG
>LTR_comp3551_g1_i1
GGCATCGCAGCAGCATCAAGGCATTGCAGCAGTCTCAAGGATTCGCAGCCGTGGCATTAT
TTAGAAGCTCAGACGCCTGTAGGGTGAGTCTAGAAATCACCACTCCTTCACACATTGTTC
CTTATTGACCAGTCGCGATCTCGATTCCATTAGTTGTTCAATTATCGCAATATGACGAAC
GTACCTGAGACAGCTCAATTAAAGGGTCTTAAGAGACAACGAGCCACAATTAAAGGGCAA
CTTACGCGGATAGAAACATATCTGGGTGAGGACGATCAGTTTGACATTCATGAATTACAA
ATTCGCAAGGAAAAGGTGATAGAGTTAAATACAAGCTTTGAAAACGTTCAGTCAAGCATA
GAGTTAGAGGACGAGGTTTCCGATCACGATTCGGAAAGAGAACAGTTCGAACGAAACTAT
TTTAAGATAAGTAGCCTCCTAAACCGCCGAATTGAGAGATTACAAACCCCTAGTAATTTA
GCAAGCACAGGTAGATTCACAGACTCGCCAAATACCGTAACGGTAAGGCAAGAAAGTACC
CTTCTACCAAAAATAGAGATAAAACCATACGACGGTAATCCCATTGAATGGCACAGTTTC
CATGATACCTTTAAAACATTGGTCCACGACAATTTAGACTTACCTGCGGTACAAAAATTC
CATCTATTGAAAAATGCACTTCGCGGAGAAATTGCGTCGGTAATTACCTCGTTAAACGCG
TCAGAACCGAACTACCGGGTCGCTTGGGACTTGTTACAAAGGCGATGCAACAGACCGCGA
CAAATCGTACAGTCGCATTTGAAAACGTTATTTGAATTACCAGAAGTAACTCGCGATGCA
CCCTCGAGCCTCAGATCATTGGCGGAACAGGCTCAAATGCATGTAAATGCACTCGCCACT
CTAGGTCAGCCCGTAGAACAATGGGACGCGATATTAGTTTATTTGATAGGAAAAAAGCTA
GACAAAAATACTCGACGCGGATGGGAACGCACTTTAGAAAATGATGAGATGCCGACATTC
GAACAATTAGTTAGTTTTGTAAACAAACAAGCGCGTGGCGAGGAGATTGAAGCGGAATTT
TCTAACACAATGAAACGGGTTCCGTATCAAGATCGTCCGCTACGAAACAAAGTTAATGCA
AGGGGGTACATTCACGTAGCGACGACAAATACTAAGTGCGTCATGTGTAACGAGAACCAC
GAAATTTACTATTGTAAACATTTTTTGCAAGCTTCAATTCGGGATAGATTAGAGGTGATA
AAACAGAATAAATTATGTCTTAATTGCTTCCGAACTGGACATTTAGTCGCCACGTGTCAA
GCAAACGGGTGCAGGAAATGCAATCAAAGGCACAATACATTATTACATTTTAATAATGAA
CACCGGGTCAATATGAACACTAGTAACACCCAAGTAGAAGCTCAAATAACAAACGCGGGA
GCCAATGCAACTGCGTTAACGGTCACATGTGATTCAGAAATACTGCTTGGTACAGCGCGG
ATTAAAATATTAGACAAATTCAACAAGGAACACGAGTGCCGCGTTTTATTAGACGGGGGA
TCTCAGACGCATTTTATAACCAGTGAACTAGCCGAAAAATTGCAATTATGTAAGCATAAC
GTAAATTTAACGCTATCAGGTTTAGGTCAGCAGGCGACCAGGGCACAATATAGTGTAAAA
ACAATAGTCAAGGCGCGGAATAGTAATTTTTCCAGTCCGATATCGATGATTGCTGTACCC
TCGATTACCGGATTATTACCATCCCGACTAGTAAACAGAACCGCGATTCAAGTACCGCAA
AACATCGCGTTAGCAGATCCGGAATTCCATAAGCCAGGGAAGATAGACGCGTTATTAGGC
AATACATTGTTCTTCAGCCTATTAAGCATTGGACAAATTAAATTAAATAACAACAGTATC
ATATTGCAGAAAACTAGGTTAGGATGGATAGTTACCGGCAAAACAGATTTGCAACCCGCA
TATAAGAACCCATCAGTAAAATCGTTCCTTGTTACGTCGAGTTTAGATAAAACGTTAAAC
AAATTCCGGGAGATAGAAGAAGTCGCGGAGAAATCGTATTTATCAGAAGAAGAAAGGGCC
GCGGAAATTTCATTTAAACAGGGTACAATACGAGATGCAGACGGACGATATTGCGTAAGA
TTACCGTTCAACATAAAAAATAAACAACGGTTAGGGAGTTCGCGAGAGATAGCGCTAAAG
GGATTTTATGCTTTAGAACGGAAATTACATTCCAATCAGGAACTGTTAACAGGATATCGG
GAATTTTTAAAGGATTACGAACGGTTAGGGCACATGACACAGGTCAGCGGAGACGAGCTC
ACCGAGGGTTTCTACCTGCCGCACCACGCGGTAATAAAGGGAGTCGATTATTGCGGACCA
TTCTTTCTAAAGGAACGGAAACACAGAAGTGAAAATAGAATCAAGGGATACGTTGTAGTG
TTTGTATGCTTTGCCACAAAGGCAACTCATTTAGAATTAGTCACAAACCTTACCACGGTG
AAGGTTTTTAAAAACCACTTAAAAGCTACGATCGGAGACGCACTGGTCACGTACGAACAA
TTGAACAGCATAGTAATCGAGATCGAGGCTATCTTAAAATCCCGACCACTAACACCCCTA
TCCTCTAATCCTAAAGACTATATCGCACTAACACCTGCACACTTCCTAATTGGTGATTCG
TTACGAACCCTACCGGAATATGAGTGGACAGATGTGCATATCAAAAGGCTGTCATTGTGG
CAACATACTCAAAGGTGCAGGTATTCAGGAAGGGACACTGGTACTCATACGAGAGGACAA
CCTTCCACCGTTGCAGTGAGAATTGGGCCGAATCTTGGAGGTACATCCAGGGGACGACAA
GATTATCCGTGTGGTGACTGTGAAGACACCGCTAGGAGGGTACAAACGGAGTGTAAAAGG
ACTTGCGCCACTACCGATAGACTGAGCGTAGCATCTATAGTTCATTGTATATACGTATAG
GCCTTTGTGTATAGATATAAGTTAGTTTTTTATGATTATGCACTCTCCAGACTTCACAGT
TTAATGTATTAGTTTAGACATGTTGAACGGAACCGTTCAAGGGGGGCGGTATGTTAAGGC
CACTTACAGCCTTAA
>LTR_comp3561_g4_i2
TTTGTAGATTTTCTACAAATAAATAACGTCCATTTAACCGTTCGGTAATTTTAGTGTGTA
GACGGTTCGGTTCATTGACTAATTTAGGACGAAGGGGACTACCAGGACCTGGGTCACGTA
CGCCTTCGTCTGAAGAGTTTTCCGTTTTAGAAAAGCAACTGAGGAAAAGCAGTTAGTCGC
CGTTCCTCGTTAGAGCCACATCGCGTAATAAATATATTTAACCTGACTACGGACTTAGTT
TTTATTTTAGTAGCCCTACAATATATTGGTAACGACGGAGCCACTATAGTGGCGCGTCGT
TCAGAAAGATGACATCCGCGAAAGCCACTATAGTGGCGCGTCGTGCCTAAGAGGTTAATA
CGTAGGAGTATTATTGGTAACGCATCGGTCCAATTCTGTCTACTGTGGCATTTTATCGCT
GCTTTGAGCTGTCTGTGGGTACGCTCGACCATTCCGTTCGCTTTGGAGTGGTACGCCGTT
GCCTTAAGATCTCGTGAGCCTAGCAAATCATTTAATCGCTTAAAGAGTCGTGACTCGAAC
TGGCGACCTTGGTTTGTTGTGATTCTAACCGATGTACAAAACCTGGTCACCCAGCCCGAA
ACAAACGTTTTAGCTACTGTTCCGGCTTCGATGTTCGCGATGAGAAATACCTGAGGTCAA
CGCGTGTACCGGTTA
>LTR_comp3565_g4_i1
GCCTCTGGAGTGCAAAGGGTTAAACATTTGGACTGCAGAAGTTTTTCGAAAATATTCAAT
ATTTTCTAATGAGATACAGATGACATTTTCTTAGATTGAATTAAGAAATCTCACATGCAT
TGAGAAATTTTCTTTCAATACTTTGTATATTGATGCATTATACAAAGGTTAATATTAAAT
ATCAAACTTTATCATTTTGATATATTAAATCAAGTATCGAGTAAGAATCGCCTTTAGAAG
GTAAAGGATTTAAAAGTAAGTTTACTCAAGAAATTTTTTACTTCAGAGTGTATGCTACAC
AGATCTTCCAAAAATTTGTCTTCGTCTATTAGAAAAACATCACACACTGACTGTAGCTGC
TACGAGACTATGAGGTTAGTAGAAAAGACCTGCTTTCAGCGATTAACCCACTTTCTGCAA
ATAAGAAAAACCTGTAGTTGAAAGTATGGAAATTCCATTGATTTATTATACATAATCGAA
GAGTTTCTCCAGGATACTCTGTATGTCCCGATCGTATACACGAAGAAAAACCTGCAGTTG
AAATTATAGGAATTTTATTGGTTTATTATAGGTAGATAATTCAAGAGCTGTCCTGAAAAA
CTCTGTAAATGC
>LTR_comp3569_g9_i2
ATTCGGTTAGAATCTGTGTTTTGTGAAAACGAGAACGGTATTTGTGCGAATAATCCCAGT
TGAAGACTTACGAAGTAAAAGAAAAGAGAAATAAAATAAGAGGTAATGCGTTGATAAGTG
AAAAGTGGCAGATTTCCATATTCGGTTGGTTTTCAAAATTCACCCTCTTGCAAATCAAGT
ACTCCTACATATACTCCATTGGAAAACATCAAACTTTAGTTACTAATAAATCAAAAATTT
CATTACAAAGATGTATATTACAGATCTATTTATTTATTATTTACTATATATGAAATGAAA
TATACATTACGTGGGATTGTAAGCTATAACACTTATTCATTCAAGAATAAAATACAGCCT
TTTTCCATGGAACAAAAGCGCAGTATATCAAAATTGATTTTTTTCTGGCCGGTTTCAAAA
AAACTGCGTTAAGGGGTTAATTTATCTGAATTATCGTTAAATCAGTTTCAAACAATG
>LTR_comp3572_g7_i2
AGAAATGTTTCCAAATAATCGTTTGATTGAATCAATTATAGTAATTCTACTTGGTCACCG
GTGACCTCATAACATTCAACGTGTCTGTTAGATTTTGGCATAAATCGACTCACGATGTGT
ATTTTGAATCGTGGTCTGTATGCACGTTCGACGAAAGCGTTCTAAGAAAGGGTCATAAAA
CGGTCAGTTTTGCGACCCGAGTCACTGCCGTTCTTTACCGTTAGTTTGCTGGTTTTTTTA
CTCCAAAACGGTCAAGAACATATTTTTGCCCTTCCGCACAGGGCTCTTTGTAATCACGCT
CTTCTAGTGTTAGTTCTGAACGAGCATTCCAAGCGAACGGTTACTAAATTTACACGAATA
CATATACTCTGTTTTCTATTTTTAATTAATAAATAAATTCTTTTGGAAGCCAGACCTGCT
AATCATTCAACAGTTTATGGGCCCAGCACGCTTCCACT
>LTR_comp3572_g7_i3
TGTACGTTCGACGAAAGCGTCATAAGAAAGGGTCATAAAAGTTTTGCTGGGTTTTTTCCC
AAAACGGTCAAGAACATATGTTTACCCTTCCGTACAGGGCGTATTGTAATCACGCTCTGT
GTGTTTAGTTCTGAACGAGCCTTCCAAGCGACCGGTTACTAAATTTACACGAATACATAT
ACTCTGTTTTCTATTTTTAATTAATAAATAAATTCTTTTGGAAGCCAGACCTGCTAATCA
TTCAACAGTTTATGGGCCCAGCACGCTTCCACT
>LTR_comp3572_g7_i4
AGAAATGTTTCCAAATAATCGTTTGATTGAATCAATTATAGTAATTCTACTTGGTCACCG
GTGACCTCATAACATTCAACGTGTCTGTTAGATTTTGGCATAAATCGACTCACGATGTGT
ATTTTGAATCGTGGTCTTTATGCACGTTCGACGAAAGCGTCCTAAGAAAGGGTCATAAAA
CGGTCAGTTTTGCGACCCGAGTCATTGCCGTTCTTTACCGTTAGTGTGCTGGTTTTTTTC
CCCCAAAACGGTCAAGAACATATTTTTGCCCTTCCGCACAGGGCTCTTTGTAACCACGCT
CTGCTACCAGGAGAGAAATACATATACTCTGTTTTCTATTTTTAATTAATAAATAAATTC
TTTTGGAAGCCAGACCTGCTAATCATTCAACAGTTTATGGGCCCAGCACGCTTCCACT
>LTR_comp3574_g4_i1
CTCGTGACAATCGGAGTACTTTACAGGACGCCCAGCGTGTAAATGAGCTCGATGCTCGGC
TTCAATGATGAGTATTGTTACCCGTGCCTTTGGTAACACGATGGGGTGCCGCTGTGGAAA
AGGGATGAACGAGTGTTTTAATCGGCCACCAACTCGTAAGATGCCGTCCTTGTGTAAGAA
GGGAGCTAACCGCTGCAATTTCCCTCCAATTTCGGAATCGTTATTCGACAGGCGCCG
>LTR_comp3576_g3_i3
CTGAAAATCCCTTTTTCCTTTTAACTATCCAGTTTTCCTTTTAGATACCAAATTTATGCA
TCCGGTGACAAAATTCACCTTTTCCAAAATTCAGGGACTGCTGCGATGAAATTCCAAGAT
TACAAAACTGCATCCCCACCATATCGCTGCAGCCCTCAGTTCTCCCAGACTCCCTTTCAC
CCACTCCTTTACAAAATCCTTTAAGTACGGAGGAAGAACGGAAGAAAGGAGGCAATTTTC
CTTAAACGAGCGACACTTCGGCATCTGTACTCCAATATTGTATTCAGTTCAACTAAATAA
AAAACCGGTGCTACAAAACCAGTGAGACTTTCTCCCTTGAGCCACACTCTCAGAATCACC
TCGACGACATCGTCATTCTACTGCTCCTGATCAAAACATTAGGGCAAGACTACCATAGTG
GAAGTAAAAGAGTAAAAGGTAAGTAGTATTAATTTATATTAACTACTTAAGAATGTACAT
ATATGTAGGGTCTATCCCGTACAAGCCCCCAATATTATAGGAACTATCCTGGACGAGCCC
CCAATGTTATAGGAATTATCCTGTGAGAGTCCTCAATGTAATGGGATATTCCCTTACAAG
TCGCAAGATCTTTAGACATCACTAAACGCTCGCTGGCTGATTACGCAAAGTTTCGCTCAC
AAAGTCTCGCTCTAACGTCTCTCTCCACTACCTCGCACAAAATGTTCCTCGCGCACGCAT
TCCCACTCGCTTTTA
>LTR_comp3581_g18_i1
ATCAGGAATGGGTGATTTTGACTCGTTTGGTAGGTTTAGTGTTAACTACGGAATACCAAC
CGGTGACATGGGATAGCTTCTACGTAAAATTGCCGGCCAACGTGTTAACACATTGTATGC
TGGAAACGTGAAACTACTATTTCCATGTACTATTGAATAATTACTTGTATAACCTCATCA
ACATTTTTGGTAAAAGTAGAAGTTAATTCCTTTCGCGTACGATTGAAAGTATTTCTATTT
GCAATGG
>LTR_comp3582_g1_i1
CCTACAGAGTTCAAAGGGTTAATAGAATTTGATGAAGAAATAGTCAGTAGTTCATTCTGA
AATTATTACGATATTTCGAATTATTCGAATGATTCGACAGCGATAGTTTTTTTACTGATT
CTCCAATACTCTTAGTTTTTATGTGTGACTTTAGGCATAGAATTTGTCTAGTATACCGTA
GCTCCTAGAATTCCCGACACTTTTTATTCAGAGGCATAATACCTTCAATTGAATTTAGCG
TGCAATTGTACAAGAGAAATTGCATTCCGCCCCCTGAATGTAAGAGTCGCAGCTAGAGAA
TCGGCTGGCAGCCGAGCCGAACGAGGTGAAAAAGTAGAGATTAAGAAGTAGAGCCGAGCG
TTCCTTATCTTGTAACAGTGCCAAGCCTGGCGTGGTATGGGGCAACGGAGAACATTAAGA
GATAAAAGATTCCTCGTCACGGAATTTACGACC
>LTR_comp3583_g9_i1
TTTTACTGTAAGAAATCAAGCGGTGAGTCAGCCCTCAACTGCAAAGGGTTTCCATATTAA
ATTTCAATTCACCGTTCAAAAAGACGATGTACACGAGAGCCACTGCAATGACGTACAGTA
GCTGAAAGGTTAATTGTTACGAGTAATCACCTTATAGAAGATAATTATCATTCTAAATTT
CCAAGGAGCATCCCACTGTTACGAGAAAATTAACTCGTCCTCGCATGTTCGAGCTTTCGA
CTGGTAGAACTGCGATCTTGCCCGCTGTACTTTGATTCGACGAGGCGCGCATGAGGAACG
GGGGCGTGGGAAGCACTCGCGAACGGGGAATTACGGAATCGCGTACAACAAGAATATAAG
AGGGAGCGGCGCGGTTCGGCCGCAGAGCCGGGAATAGCGCTGGATTGCGGACGCGAAAGT
TCGTCGGTCGTAAAACGAGCTTAGAGCCCTCCGACCATCCACGGAGCTTTCTCCGTGACG
TTAGAAACCAGTTCGGATGTAGCCGGACTGAAACCGGGGAGGGATGATGGCGGTGGAG
>LTR_comp3589_g1_i1
CGATCAATTTGCGTACGAGTGTTGACAATGTGCGAATGTAATATACAATGTTGCGATACG
GGGTCGTGTAGACGACGAAGACTTAATCCTAAATTCGTGTGAGGATCCGAGAGGATGATC
TTCTTCTCGTGGAGGCCGTGGACTGCGTGGATGCTCCAGTCCACCCTGGGATGTCAAGCG
TTGTCTTCCGTCGGAAGAAGCGCGAGTTGCTTGACATTTCGCTTGAACGTGCCGTTTGCC
GTACGAACTGTCACCGCCCTGATGACGCCATCTGAGCCGGGGTGTACGGTTTCGATGCGT
CCGAGGTCCCACTGCAGCGGCGGAAGATGGTCGTTCTTGAGGACCACGAGAGATCCCGTT
TTGATTTCGTGCGATCCTCGGGTCCATTTTTGTCGCACGTTGAGGTGGTGGATATATTCC
TTGTGCCACCTAGTCCAAAAGTCCTGTTTCACCTTCTGGGCATGTTGCCAGGATGACAGG
CGATTGCTCGGCACATCGTGAAAATTCGTCTCGGGCATGCCCGTCAACGAATTGCCGATT
AAAAAATGGGCGGGAGTGAGAGCAGAAGGATCATTAGGATCTGACGAAAGTGGTGTCAGC
GGACGGGAATTTAGGATCGCTTCTATTTCGATTACTATGGTATTGAAATGTTCGAACGTG
TATAAATTGTCACCCATTACCCGTCGGAGATGGTGTTTAAAAGATTTTACCGCAGCTTCC
CAGAGACCACCGAAATTGGGGGAAATTGAGGGAATGAAGTGCCATGACATCTCCTTATCG
GTAAGGAAATGCCGTAACACATCATCCCCTTGCAAATCTTGGTAGAGCCGGGTGAGTTCG
TTATTGGCACCCACAAAATTGGTGCCATTATCCGAGTAGATGTTACAACATATGCCCCTT
CGCGAAATGAAGCGTTTCAACGCGGCGATAAACGCTTCCGTCGTCATGTCGCTGACAACC
TCGAGATGGACGGCCTTCATAGCGAAGCAGACAAAGACGGCAACGTAAACCTTAACGCGA
GCCCGGTTTCGATATTTCTTCTCCTTAACGGAAAATGGTCCACAATAGTCGATGCCGCAA
TTCTGGAAGGGTCGAGACTGGGTGACGCGGGTAATGGGTAGACGACCCATTACATATTCG
GTGCTCGGTGGGCTGACGCGGAAGCAACGGATACATTGTCGTATGATTTTACGCACCGAG
TTTTTGCCGTCGATGGGCCAGTACCGTTGTCGTATGTTGTGTAACGTCGTGTTCAGTCCT
GCGTGGTGGTTGTCGATATGTGTTTGTCGAATGATCAGTTCGGTTATGTAGTGTCCCTTG
GGCAGTAATATCGGATGTTTTTGGTCGAACGGTAGGTCGGAGTTTTGTAGTCGGCCTCCG
ACGCGAAGTATTCCCTTTTTGTCGCGGAACGGGTGCAACGGGAGCAACTTACTTTTGGGA
CTGAGTTCGCGCTCAGTGTCGAGGCGGTGCAAGTCAGTCGCGAACGCGGAAGCCTGCACG
AGTAAAACAACGCGTTCGTTAGCGCGGCGAATCTCCTCAACCGACGGTGGTCCGTTCGCG
CGATAGTCCTTTTTGAACCGTAAACAGTAGGCCACGATACGCTGAAGTCTCTTTATGCAT
GAAAACCGTCGCAGAATTCCGTCGTCTCGAACGACGGACGTGGCGAGACACATCACCGGC
CGCGATTCCGGTACCTCCGTGGAGGGCGCGAACCTTGACTCAGGCCACCTCGAACGGTCG
TGGCTGAGCCATTGTGGGCCATGGTACCAGATCGAGGCACGAGCGAACTCCGAGGGAGTC
TGTCCTCGTGAAACTAAGTCCGCCGGATTGTCGTTCGAGCGTACGTGATTCCACGCGGCA
ATGTCGGTCCTTTTCTGTATTTCTGCCACGCGATTGGCCACAAATGTTTTTAGCGTGTTT
GGTTCCTTTTGTAACCAATTTAGTACGATTGTCGAGTCCGTCCAGAAGTATGTCTTGTCG
AGTCGGTAAGTCAGTGCGTCGCGTACGGTCGTGTAGAGGGATGCGAGGAGGACGGCACCG
CATAATTCTAGACGAGCGAGAGTGGCGGTCTTCAATGGTGCGACTCGAGACTTTGCGCAC
AACAATTGAGATTTGATGTTCTCCGCGGAATCTATCGTGCGGATGTAAATGCAAGCTCCA
TAGGCTCGCTCGCTTGCGTCGCAAAACCCATGGAGCTCGATACGTCTAGCCGCGCGTTGA
GACACGTGTCGTTCAAACCGAACGTGCTCCAACCGCGGCAATTCCTTGACGTACGTAGTC
CACTCCGTATGAAAAAGAGCTGGGAGTGACTCGTCCCAGTCTAACTGCAGTTGCCACAAT
CGCTGCATCAGGATTTTTGCGGTGACGATGACCGGCGCGAGTAATCCCAAGGGGTCGAAA
ATTTTCGCGATCGCGGAAAGAATGTTGCGTTTCGTGACCCGCTGGTTATGGTTCGAGTCG
ACTACGTAAATGATGTTGTCGCGGCGCGAGTCCCAAGACACGCCGAGGGTTTTTACCATT
GTGTCGCCAAAAACCTTCGGGTGAATTTGCGACGTGGAGAGTCCGCCGAGAAGTCGCGGA
TGGTTGGAGACCCACTGTCTGATATTGAGTCCGCCGCGTTTTAATAACCCGAGCATTTGA
TCGCGAATGTTCAATGCTTCCGCGTATGTATTTGCTCCCGTTATGAGATCGTCCACGTAC
AAGTCGCGTCGAAGAACATCTGCCGCCACGGGATAGTTGTTCTGTTCATCTTGCGCGAGT
TGATGCAAACACCGGATCGCGAGGTACGGAGCAGAGGTCAAACCGAATGTGACCGTGTTC
AACGTGTATGTCTTTATGTTGTTGTGGTCGTCTCGCCACAAGATGCGTTGATACGGCCGA
TCCTCAGGACGTATGATAAACTGGCGGTACATTTTCTCGATATCGCCTGTGATGACGTAT
GCATGCATACGAAATCGCAAAAGCAACGCCAGC
>LTR_comp3589_g3_i1
AACCCATGGAGCTCGATACGTCTAGCCGCGCGTTGAGACACGTGTCGTTCAAACCGAACG
TGCTCCAACCGCGGCAATTCCTTGACGTACGTAGTCCACTCCGTATGAAAAAGAGCTGGG
AGTGACTCGTCCCAGTCTAACTGCAGTTGCCACAATCGCTGCATCAGGATTTTTGCGGTG
ACGATGACCGGCGCGAGCAGTCCCAATGGGTCGAAAATTTTCGCGATTACGGACAGAACG
GTGCGTTTCGTGACCCTTCGGTTGGGGTTCGAGTCGACTGCATAGATAATGCTATCGCGG
CGTGAGTCCCATGATATTCCGAGGGTTTTTATTGTTGGATCGCCAAAAACCTTCGGGTGG
ATTTGCGATGCGGAGAGTCCGCTGAGGAGTCGCGGATGGTTGGACACCCACTGTCGGATG
TTGAGTCCTCCGCGTTTCAACATCTCGATTGTTTGGTCCCGAATTTTTATTGCCTCGTTG
TACGTGTTTGCTCCTGTCAGTAGATCGCCTACGTATACGTCTCTCCTGAGGACATTTGCC
GCGAGGGGACAGTTGTCCTTTTCATCGATCGCGAGTTGACGGAGGCATCTAATCGCAAGA
TACGGGGCCGAAGTTAAACCGAAGGTGATAGTGTTTAATGCGTATGTCTGTATTTTGTTC
TTGTCATCGCGCCACAAGATGTACTGGTATGGTCGATCTTCGCGCCGGACCATAAATTGC
CGGTACATTTTTTCGATGTCCCCGGTTAAAACGTACGCGTGCATCCGAAATCTGATGAGG
AGCGTAAAAAGGTCATCCTGAATGGTGGGCCCGGTCATCAAGGTGTCGTTTAGCGAAATT
CCAGTGCTTGACTTTGCTGAGCCGTCGAATACGACGCGGACCTTCGTGGTGTCGCTTGAC
TCCTTGATGACCGCGTGGTGAGGCAGGTAGAAACCCTTTGCATCGGGAGTCTCTACCGGC
TCCATATGACCCAATTCGAGGTATTCTCGAATGACCGCTGAATATTCACGTTTGAAGTTG
GGATTTTTTTCGAATTTACGCTGCAACGAGAGAAGCCGACTCAGAGCGCGCGACCGAGAT
TCTCCAATGTTGTGCCGCTTCTCATTGAATGGTAGCGCTACGATATACCGTCCCGAATCA
TCGCGTGAAACGTGCTGCGTAAAATGAG
>LTR_comp3592_g1_i3
GATTAGGACTAGTGTCCCGGGTCCGAATGTGGTAGGGGATTTTGTTCGCCATTTGTTGCG
TTGTTGCAGCTGATGGAGATATTCAGCTTGCCATCGTTGCCAGAAATGCTGTAACATACT
CTGGAGGTGCTGATAACGATTGAGTCGATTTTTCTGTATATGCTTCAGGTCAGATTCTGG
AAATGCGGTTAGTGAGTCGCCGGTAAGGAAGTGTCCAGGCGTGAGAGGAGATAGATCTGC
TGGATCATCGGAAAGGGGGGATAAGGGTCGTGAATTTAAGCATGCTTCGATTTGAGTCAA
TACGGTATACATCTCTTCATATGTTAAGCGAGTTTCGCCAATGACTCTCTTTAAATGATT
TTTAGTGGATTTAATTACTCCCTCCCACAATCCTCCAAATTGTGGAGCTCGAGGGGGAGA
CAAATGCCATTAAATTTTATTTTCGTTTAG
>LTR_comp3598_g1_i1
TCTCCGGCGTGCGGCGATTGGAAGGTTTCGGAGGTGTCTTCGGTTTTCTGAAAGGTAACT
TGGTGAAACCGCTGAAGAAGACTTGTGTGAAGGAGTTGTGTTCTGTTGGAATTATAGTTG
CAATGGAGATATTTCGAACTTCTGTAGAGATATTTTGAAGGTAATTTATCAAAGGTTCCT
TAACCTTAATACCACGTGTTTTCATAACGAATCATACCTCGATGTGACTCTC
>LTR_comp3598_g3_i3
TCTCAGTCACTTATGAGAATAAAAAGAATGCTTAAAATGTTATTGTTTTTGTTTCTTAAG
TACTCGTGATTACCGCAAGGATGTTCGAGCTTTGTAGGCGTTTGCACGTGGTGTGCCGAC
TAATAAAACTTGTACGGTTCGAAGGACCACCCGATTTGAGGGAACAAAACTTAGAAACGA
GTAGCAGGCGAAGTGGACTTTGACTCGCGATAAACATTGACGACTCGGTTTCGACCGCTT
TCGTTATCGGCTCGTTCGCGTAAACGAAGGTCGCGAATGGAACAGAATACGACGAAGTG
>LTR_comp3600_g1_i1
GGATCGGGTGACGTAGGCGCGGTGATCGGGTGACGTAAGCGCGCTCGGCCGCTGGGAATG
TTTGGGTGATATGATCCCTTTCTGCCGGACGGGATGTTTGGGCGAGATAATCTCGGCCGG
CCGGACGAAATGTTTGGGCGAAATAATCTCGCTCGTTAGCGCGACCGTGCGAACTAGGTG
ATATCACCTGGTTCTGAAACCGTACATGGCGATCGCTGTACCTTTCTTTGTCTACTTCAT
GTTGCTTGTAGAGATTTATCGCTTCGTCGAATATGTCGCTTAGATTATGGAGTCTAGAAA
TACGCAATTCTGTGCGTAATGTCGGAATTAGTCCTGAGATGAAACTATCGATTGATAAAC
TATCTATTTCGCGCATAGGTACGGTGTCGCGTGAGGCGTCTGAGATCGCCGATTTTAGAT
CCTTGACACGGCCGATGTAGTCTAAGATGTGTTCATTTGGCCGCATGTAAATGTTCGCCA
ATTCACCTCGGTAATGGTCAACGGAATGTCGCGGTCCGAATATCGTTTTGAGGCGGTTGC
AGAGTTCGGATACGGTACATGGATTTTCATCCTCTACAGCGGCGTACGCGCGTCCGCGCA
ATTTAGTTAGAATCAGTTTCGTTAATGAGCGCTCCGCTGCGGGAGAAATGATCTCGCGTG
CGCGTCTGCATGCCCGTGAAAACTGTAGGACGGGTATGTTTGATCCGTCGAAAATTGGGA
CAGTTTCCAACGCCTCCCGCAGGCCGAAGGAGTGATTTTCGGGAACGATTCCTACAGGCA
TTGTTTCGGTTTCGCCATGTGATGGGAAGGGGGAACGATTGGACGCGCGTTGTTTCGGGG
AATGGCGCATGTCTTCTATAAGTCGACGCAGGTTTTCTATTTCCGTGCGAGTGTCGTTAG
ATTCTGATAACGCGGCACGATTTTGTTCCCGTTCGTCTTGTAGAATTCGGCGAAGGTCGG
CGTTTTCGGCGCGAAATTTTTCATAATCATTCATTAAAGCGAGTGCGTTTTCGCGTTCCA
TCTCTAGAGCGGTCTGCTCCTCGCGGAGACGTTTCTCTTTATCGTTTAGATGTCGTTGGC
GGATGGCCAATTCGTCCGCGTTTGACGGTTGCTCGGCGGCAGCTGCTTTGGAGCGAGTTG
CCATTTCGGAGTTTATACACGACGTACTTCTCGATTATCCCACCGCTGCCACCAATTTGT
TACGTCCCGGGACGACTAGCGTGAAAGAAGTAACGCGGACGTTCCGTTCCCGTAACTGAA
TTTATGAGATTTTGAGCCACGCGGTACTTGCGCCCGTCGTCTGCTCGGGGATACGCGTGA
ATTCCGAAGGACACTCGCGGAATAATGAGGATCTTGTAGAATGCATGCAGAAAAATATGT
ATGGGTTCACTTACCATTCGTTGATACTGCCCAATCGCCCGTCTAGGATCCGCAGGTCAC
CTCCAACACGTTCGGGATGACGGTTGACAAAGGCTCGGCCGTTGCTGAGACGTAGCTTCT
CGAGGATGTAGGTAATGAGGTCCGAACGTGGGTTGCAGGTTATTGTAGAGAATAATTCAC
GAAGTACGAGTAACAAAATTGTAGATGTATTTTGAAGAACGAGATTTTACAGTTATATAC
TTAAACTTATTTTCCTAAAGACTACGCGATTATAAGACGTTGTACGCTTACTTTAAGATA
ACAGAAACGCGGCGGCACGCGGGCCGGAGAACCGCGTGAAGGAAACGACTTTACGATTTA
GAAGTTTGACGAGAAGTGACGACGGGCCCAGTTCGCTGGTCGGTCATAGGCTGGGCCGGT
CTCGATCAGTTTGTGGTGGGGGACGGACGCTCGGTGGGGCGCGTGTTGAGTGGGGGTAGG
CGCGCGCAGCGCACTCGCTGGACGGTTACATGTGTTATACGTTGGTCGGTAGCTTAGGTT
AGTTGGTAACTTATGATAGTCGGTAACTTGCGTTAGTCGGTAAATTATTATTAGTCGGTA
ACTTATCCTATGTGGTTAATGACTTATCCTAGGGGCTAAATTCTACGGCTCTAGGCCAAC
GTCGGCAGACGTAACACCTCCCCCCTTAGCGGGGACGATTGTTACGGCGAAAAATCGTCC
GAATTTCCCGGCGTGTCCGGGCGGCGGTAGCTTCGAGGGAAAGGTTGGCGGAATGAGTCT
CTTAAGTGTCTGACGGTGGGTTCGCGCACTTCTGTGGCCGGTGGGGCATCACGGGGCGCA
CTCGCTGTTTCTTGCATTACCGATATTTCGGCGTATACGGGGGACTTAGGTCGAATGCAT
TCGCGCATTTGGGGGTTTTCACTGTTTTGAGTCTTTTGGATACGCAGACAGAAGTGTGTC
AGGGAGCTCCAGGTGGCTGCAATCAGGCGTAGACTCCATCCGTAAGCTGCGTGAAGGCTA
ATGGCGTTGAGTACCGTGTTCACTACTAGTTTGATTATTCGAAGCGTGATGTAGATTCCA
ATGATCCCTGCGCTCACTGAACCAAAGGTGAGAAATCCATTCCACATCCTTCTTGCCGTG
GATTCTGCAATCCTATTTAGGGTCTCTTCGTCGAAGAAGTGGTGTATTTTTACGTTGTCT
ATTGAATATTGTTGCCCTGTTGCTCCTTGTGCAAGGCTGTTGATTATGGAGTTCCGTTGC
ACTGGGAACATAATATGGTTTCTAAGGGTTTCCAGTTCGTCCGACGAATATATGCCGCCG
GTGGCGATGTTTGATGGGTCTACGTATTTCCATGATGATTCTGTTAGTCTACCCATCGTA
GTTGGTGCCATACTTTCCGTGGGGCGTGGTAGCATTTTGTACCATGTCCCGTGGAGTTCG
TACATGGTGGGTAGGAGATCGTTACAATCTCTCTGGGTGCCGCTCGGCGACAGGATGCGG
TTTTTAGGCGTTAGGAAGAACGATTGGTTACGGTACGACACGGGTAGCTCCAAAAAGCAG
TTCCGGGTTTTCCTGAGGGTGACAGTGACCGGCACACACTTAACTAAATGGATAGCTTCT
CCGGCTTGGATGGCTAGATGGCCGGGTCCTTTGGCCAGGATGGTGGCGACGTCGTCTGGG
GCTGCCTGAATTAGGCTCAACATATTCTGGGTGATCTGTTGTTCTAGTCGACACTTTTGC
GTTACGGTGTCTTTGTACAGTTGGATTATTTGCGTTTTTATGTGTTTTTCCACGTAGATA
AATTTTGCGTTTACGTACGTGAAAAGGTCCAGGTTGTCGGTTGACATTCTTGTCTTAGAT
TTGAATTTTCCCGTGGCAGTATTCAATATGAAGAGTTTCGGATGTTCCGTGTGGAACAAG
GTGTAGCCGCATAGGCCGGATTGTCCCGTCTGGGTGAGAGCGAATGTTGCGTCTCCAGAG
GTTGCTGTGTGAATTACTGTATGTTCCTTAGGATGAGAAACTTTTGTTGCAGGGCCTTCG
TAGAGGATGTCGTAGTGATCGAAGTTGCAGTGTGTTGGTGGGACCACGTCCCAGAACGTG
TAACCATCCTCCGCGTCGAGGCACGTACCGGACTGGAAGCGGCATCTCTGCCCTGATGGA
AGGATGATTTTATTGGTATCCAGGTTGACTGGAACCTGGAGATGTTTTAATGTAATGCGT
ACGAGCGCCTGAACGACCACGTTCGACCAGGTGCCAAACGGGTCGCTGTATGTTGATCCC
TCGCATGTTCCGTCCATCTGTACGGTTCCACTGAGGGTGACACTTCTCGTTGACGTTGAG
TTCACTGTGATGCCTGTTATCTGGATCGTTTGCGAGATTGAGGTGGCTCCTGTAGCGTAC
AGGATCTGGCACGAATCACGTGAGATTGGAAACAGGTATTGTTGTCGTCCGTTTTGGACT
ATTGACGAATGCGAGTGCATGCCGCAGTAGTTTATTGTCCGGTCGATTTCGATTCGGCAT
TGCGTGATGGTTGCCGCATTGAATTCTGCAAGCTGCAGTAACTGAATTTCCTCGTTTTGC
GTAGTCGGTTCGATTGTTTCGATTTCGCACGATGGTTGATCCAGTATGGAAAATGTCGTA
ACGTTTAGTGTGGATCCTCCGCAATCGTATCCGATGAGGGCGGAGGCGATGTTCATGAAC
ACGGTAATTATGGCTGCTTGGGTGTGCATGGTGGCTGCTGAAGGTAGACTGGGCTCCCTT
TGTGATCGTCATTGTCTCGTATCCATTAATTGAGCAGTAGTGGGGGTTGGGGAGGGGCTT
CTTGCCAACTTAAGTTTATCGCTATGTACAATCCTAATCTTATTCTTATTTACTAAGAGT
TTAACATTATTATTTGGAAGTACTTCTAATATGGTGTACGGACCTGTATATTGCGTGTCT
AGCTTGCCCCTTTGGGGTTCTTTCAGCAGGAAGACGCGATCGTTTCGCCCGAAAACTCGT
GGGCGTACTCTACGATCGTAGTATTTTTTTGAGCGAACTTTAGCGTTAATTATGTTTTCG
CGAGCTTGGGAAATGGTCTCTGAAATTTTTGTCTGTAGTTCGCATAGATAGTACTGGTAC
[truncated: 20,704,166 more chars]
