# Supplementary material
Source: publisher figshare collection journal article supplement (https://gsajournals.figshare.com/ndownloader/files/13479752)
Supplement: Supplementary file 1 [file 13479752 › Nme.TE.gff]

##gff-version 2
##date 2017-12-14
##sequence-region Nme500.fa
scaffold100113_cov13	RepeatMasker	similarity	156	366	8.5	-	.	Target "Motif:NA_COMP3023_G1_I1" 1 212
scaffold100252_cov36	RepeatMasker	similarity	1	145	2.8	+	.	Target "Motif:LINE_COMP2932_G1_I1" 97 241
scaffold100252_cov36	RepeatMasker	similarity	106	341	2.5	-	.	Target "Motif:LINE_COMP2046_G1_I1" 299 533
scaffold100252_cov36	RepeatMasker	similarity	445	586	0.0	-	.	Target "Motif:NA_COMP3045_G1_I1" 249 390
scaffold100504_cov13	RepeatMasker	similarity	420	666	0.0	-	.	Target "Motif:SIMPLE_REPEAT_COMP13282_G1_I1" 59 305
scaffold100505_cov44	RepeatMasker	similarity	876	936	8.3	+	.	Target "Motif:NA_COMP29930_G1_I1" 1 62
scaffold100516_cov85	RepeatMasker	similarity	133	339	8.2	-	.	Target "Motif:NA_COMP3023_G1_I1" 3 210
scaffold100524_cov64	RepeatMasker	similarity	1	411	5.6	+	.	Target "Motif:LTR_COMP3615_G1_I1" 564 1020
scaffold100524_cov64	RepeatMasker	similarity	319	516	3.6	+	.	Target "Motif:LTR_COMP3615_G1_I1" 822 1016
scaffold100687_cov41	RepeatMasker	similarity	422	605	7.7	+	.	Target "Motif:OTHERS_COMP2422_G2_I1" 52 235
scaffold100688_cov26	RepeatMasker	similarity	326	612	0.0	+	.	Target "Motif:NA_COMP19312_G1_I1" 1 286
scaffold100688_cov26	RepeatMasker	similarity	1022	1130	8.3	+	.	Target "Motif:SIMPLE_REPEAT_COMP4112_G1_I1" 3 111
scaffold100688_cov26	RepeatMasker	similarity	1037	1148	6.4	+	.	Target "Motif:SIMPLE_REPEAT_COMP4112_G1_I1" 3 111
scaffold100688_cov26	RepeatMasker	similarity	1059	1169	9.0	+	.	Target "Motif:SIMPLE_REPEAT_COMP4112_G1_I1" 1 111
scaffold100688_cov26	RepeatMasker	similarity	1075	1181	8.4	+	.	Target "Motif:SIMPLE_REPEAT_COMP4112_G1_I1" 5 111
scaffold100699_cov41	RepeatMasker	similarity	200	482	4.2	+	.	Target "Motif:NA_COMP243_G1_I1" 1 282
scaffold100889_cov21	RepeatMasker	similarity	122	332	8.1	-	.	Target "Motif:NA_COMP3023_G1_I1" 1 212
scaffold100899_cov49	RepeatMasker	similarity	21	749	5.6	+	.	Target "Motif:SIMPLE_REPEAT_COMP3573_G1_I3" 1 658
scaffold100899_cov49	RepeatMasker	similarity	1225	1514	3.8	-	.	Target "Motif:NA_COMP2971_G1_I1" 142 431
scaffold100900_cov85	RepeatMasker	similarity	21	671	5.5	+	.	Target "Motif:SIMPLE_REPEAT_COMP3573_G1_I3" 1 658
scaffold100900_cov85	RepeatMasker	similarity	819	1071	4.4	-	.	Target "Motif:NA_COMP2971_G1_I1" 142 392
scaffold100908_cov62	RepeatMasker	similarity	24	97	0.0	-	.	Target "Motif:SIMPLE_REPEAT_COMP30488_G1_I1" 1 74
scaffold101140_cov49	RepeatMasker	similarity	1812	1939	6.3	-	.	Target "Motif:NA_COMP3483_G3_I3" 34 162
scaffold101140_cov49	RepeatMasker	similarity	2033	2291	0.0	+	.	Target "Motif:NA_COMP41132_G1_I1" 1 259
scaffold101140_cov49	RepeatMasker	similarity	2267	2428	0.6	-	.	Target "Motif:LTR_COMP41132_G1_I2" 98 259
scaffold101146_cov38	RepeatMasker	similarity	1	145	5.5	+	.	Target "Motif:NA_COMP3505_G1_I4" 447 591
scaffold101189_cov51	RepeatMasker	similarity	1	510	3.5	+	.	Target "Motif:LINE_COMP3613_G1_I4" 529 1038
scaffold101199_cov100	RepeatMasker	similarity	686	1251	2.1	-	.	Target "Motif:LTR_COMP2813_G1_I1" 1 566
scaffold101227_cov13	RepeatMasker	similarity	385	551	6.0	-	.	Target "Motif:NA_COMP3023_G1_I1" 46 212
scaffold101256_cov44	RepeatMasker	similarity	1	94	2.1	+	.	Target "Motif:NA_COMP3505_G1_I4" 314 407
scaffold101256_cov44	RepeatMasker	similarity	92	244	9.2	-	.	Target "Motif:NA_COMP7397_G1_I1" 338 492
scaffold101256_cov44	RepeatMasker	similarity	115	280	9.7	-	.	Target "Motif:NA_COMP7397_G1_I1" 332 488
scaffold101256_cov44	RepeatMasker	similarity	161	335	9.8	-	.	Target "Motif:NA_COMP7397_G1_I1" 336 491
scaffold1012_cov64	RepeatMasker	similarity	234	600	4.5	-	.	Target "Motif:NA_COMP3518_G5_I1" 2 360
scaffold1012_cov64	RepeatMasker	similarity	568	632	4.6	-	.	Target "Motif:NA_COMP3518_G4_I4" 246 310
scaffold101405_cov26	RepeatMasker	similarity	18	72	9.1	+	.	Target "Motif:NA_COMP3023_G1_I1" 156 210
scaffold101453_cov38	RepeatMasker	similarity	176	514	0.0	-	.	Target "Motif:NA_COMP17858_G1_I1" 1 339
scaffold101473_cov21	RepeatMasker	similarity	237	447	9.9	-	.	Target "Motif:NA_COMP3023_G1_I1" 1 212
scaffold101621_cov46	RepeatMasker	similarity	7	322	0.6	+	.	Target "Motif:OTHERS_COMP51030_G1_I1" 2 317
scaffold101621_cov46	RepeatMasker	similarity	2881	3130	0.4	+	.	Target "Motif:NA_COMP41977_G1_I1" 1 250
scaffold101637_cov76	RepeatMasker	similarity	243	1111	7.4	-	.	Target "Motif:LINE_COMP3508_G8_I1" 1 869
scaffold101637_cov76	RepeatMasker	similarity	1268	2560	6.2	+	.	Target "Motif:LINE_COMP3359_G2_I2" 1 1293
scaffold101639_cov36	RepeatMasker	similarity	242	1111	4.8	-	.	Target "Motif:LINE_COMP3508_G8_I1" 1 870
scaffold101639_cov36	RepeatMasker	similarity	1268	1557	3.8	+	.	Target "Motif:LINE_COMP3359_G2_I2" 1 290
scaffold101645_cov62	RepeatMasker	similarity	152	482	0.0	+	.	Target "Motif:NA_COMP28785_G1_I1" 1 331
scaffold101645_cov62	RepeatMasker	similarity	869	1142	0.0	+	.	Target "Motif:NA_COMP22514_G1_I1" 1 274
scaffold101803_cov26	RepeatMasker	similarity	5	52	8.3	-	.	Target "Motif:NA_COMP19462_G1_I1" 112 159
scaffold101845_cov31	RepeatMasker	similarity	1	198	3.5	-	.	Target "Motif:OTHERS_COMP482_G1_I1" 1 198
scaffold101845_cov31	RepeatMasker	similarity	864	1118	0.8	-	.	Target "Motif:NA_COMP50783_G1_I1" 1 255
scaffold101911_cov44	RepeatMasker	similarity	453	662	9.5	-	.	Target "Motif:NA_COMP3023_G1_I1" 2 212
scaffold102012_cov18	RepeatMasker	similarity	453	556	2.9	-	.	Target "Motif:NA_COMP3023_G1_I1" 108 212
scaffold102067_cov38	RepeatMasker	similarity	364	594	0.4	+	.	Target "Motif:LOW_COMPLEXITY_COMP26397_G1_I1" 1 231
scaffold102083_cov54	RepeatMasker	similarity	65	283	6.9	+	.	Target "Motif:NA_COMP3610_G2_I1" 1 219
scaffold102083_cov54	RepeatMasker	similarity	712	943	8.4	+	.	Target "Motif:SIMPLE_REPEAT_COMP38856_G1_I1" 1 250
scaffold102224_cov62	RepeatMasker	similarity	100	389	0.0	-	.	Target "Motif:NA_COMP47571_G1_I1" 1 290
scaffold102226_cov92	RepeatMasker	similarity	100	390	6.9	-	.	Target "Motif:NA_COMP47571_G1_I1" 1 290
scaffold102226_cov92	RepeatMasker	similarity	780	831	3.9	+	.	Target "Motif:SIMPLE_REPEAT_COMP2928_G1_I1" 2 53
scaffold102368_cov51	RepeatMasker	similarity	1	422	1.9	-	.	Target "Motif:LINE_COMP3617_G2_I1" 1 423
scaffold102368_cov51	RepeatMasker	similarity	473	765	2.4	+	.	Target "Motif:SIMPLE_REPEAT_COMP3405_G2_I1" 1 293
scaffold102450_cov38	RepeatMasker	similarity	1	270	1.1	+	.	Target "Motif:LINE_COMP3541_G5_I1" 4925 5194
scaffold102450_cov38	RepeatMasker	similarity	247	1239	3.7	+	.	Target "Motif:LINE_COMP3544_G1_I5" 1 1015
scaffold102504_cov59	RepeatMasker	similarity	1449	1631	6.6	-	.	Target "Motif:NA_COMP3498_G12_I1" 430 636
scaffold102504_cov59	RepeatMasker	similarity	1608	1808	0.5	+	.	Target "Motif:NA_COMP25859_G1_I1" 91 291
scaffold102659_cov64	RepeatMasker	similarity	61	497	4.6	+	.	Target "Motif:LINE_COMP3508_G4_I1" 1 437
scaffold102666_cov49	RepeatMasker	similarity	256	545	0.0	-	.	Target "Motif:NA_COMP36342_G1_I1" 1 290
scaffold102865_cov62	RepeatMasker	similarity	589	636	2.1	-	.	Target "Motif:SIMPLE_REPEAT_COMP3514_G3_I1" 1 47
scaffold102865_cov62	RepeatMasker	similarity	596	746	2.7	-	.	Target "Motif:LOW_COMPLEXITY_COMP3514_G5_I2" 9 159
scaffold102894_cov85	RepeatMasker	similarity	1	232	8.1	+	.	Target "Motif:NA_COMP3573_G1_I6" 463 686
scaffold102894_cov85	RepeatMasker	similarity	209	538	0.3	+	.	Target "Motif:NA_COMP3573_G1_I7" 1 330
scaffold102900_cov59	RepeatMasker	similarity	1696	2002	0.0	+	.	Target "Motif:NA_COMP4775_G1_I1" 1 307
scaffold102900_cov59	RepeatMasker	similarity	3041	3302	0.8	-	.	Target "Motif:NA_COMP42607_G1_I1" 1 262
scaffold103018_cov28	RepeatMasker	similarity	1	602	2.3	-	.	Target "Motif:LINE_COMP3462_G2_I7" 736 1337
scaffold103128_cov33	RepeatMasker	similarity	358	568	9.0	-	.	Target "Motif:NA_COMP3023_G1_I1" 1 212
scaffold103128_cov33	RepeatMasker	similarity	533	607	0.0	-	.	Target "Motif:NA_COMP3023_G1_I1" 138 212
scaffold103248_cov38	RepeatMasker	similarity	145	445	0.7	+	.	Target "Motif:NA_COMP12194_G1_I1" 2 302
scaffold103257_cov38	RepeatMasker	similarity	1	208	0.0	+	.	Target "Motif:NA_COMP17014_G1_I1" 49 256
scaffold103257_cov38	RepeatMasker	similarity	1670	1813	8.3	-	.	Target "Motif:NA_COMP3473_G1_I1" 146 293
scaffold103257_cov38	RepeatMasker	similarity	1697	1813	0.0	-	.	Target "Motif:NA_COMP3473_G1_I5" 146 262
scaffold103318_cov15	RepeatMasker	similarity	660	899	0.4	-	.	Target "Motif:SIMPLE_REPEAT_COMP14864_G1_I1" 14 253
scaffold10334_cov62	RepeatMasker	similarity	643	839	9.6	+	.	Target "Motif:NA_COMP3579_G8_I1" 3 229
scaffold10334_cov62	RepeatMasker	similarity	975	1231	1.9	+	.	Target "Motif:NA_COMP5488_G1_I1" 1 257
scaffold10334_cov62	RepeatMasker	similarity	1417	1666	0.0	+	.	Target "Motif:NA_COMP36385_G1_I1" 1 250
scaffold103356_cov38	RepeatMasker	similarity	514	837	0.6	-	.	Target "Motif:NA_COMP12993_G1_I1" 20 343
scaffold103358_cov38	RepeatMasker	similarity	350	533	5.4	-	.	Target "Motif:SIMPLE_REPEAT_COMP1859_G2_I1" 186 369
scaffold103424_cov38	RepeatMasker	similarity	166	776	0.7	-	.	Target "Motif:SIMPLE_REPEAT_COMP25304_G1_I1" 25 635
scaffold103429_cov38	RepeatMasker	similarity	925	1377	2.7	-	.	Target "Motif:NA_COMP2707_G2_I2" 361 831
scaffold103429_cov38	RepeatMasker	similarity	1402	1971	0.0	+	.	Target "Motif:SIMPLE_REPEAT_COMP5680_G1_I1" 1 570
scaffold103429_cov38	RepeatMasker	similarity	2222	2643	0.2	-	.	Target "Motif:NA_COMP48186_G1_I1" 1 422
scaffold103566_cov54	RepeatMasker	similarity	1123	1487	0.0	-	.	Target "Motif:NA_COMP18572_G1_I1" 1 365
scaffold103571_cov62	RepeatMasker	similarity	1	161	1.2	-	.	Target "Motif:NA_COMP933_G1_I1" 41 202
scaffold103642_cov15	RepeatMasker	similarity	110	320	8.1	-	.	Target "Motif:NA_COMP3023_G1_I1" 1 212
scaffold103673_cov108	RepeatMasker	similarity	199	586	0.3	-	.	Target "Motif:NA_COMP1577_G1_I1" 492 880
scaffold103821_cov62	RepeatMasker	similarity	599	671	8.2	+	.	Target "Motif:LINE_COMP41531_G1_I1" 1 73
scaffold103821_cov62	RepeatMasker	similarity	719	781	7.9	-	.	Target "Motif:LINE_COMP3614_G1_I3" 1532 1594
scaffold103821_cov62	RepeatMasker	similarity	780	1600	9.9	-	.	Target "Motif:LINE_COMP3614_G1_I3" 595 1416
scaffold10382_cov87	RepeatMasker	similarity	605	886	1.8	-	.	Target "Motif:NA_COMP43208_G1_I1" 1 282
scaffold10382_cov87	RepeatMasker	similarity	838	963	8.9	+	.	Target "Motif:NA_COMP3534_G8_I1" 85 208
scaffold10382_cov87	RepeatMasker	similarity	1923	1996	9.5	+	.	Target "Motif:NA_COMP3496_G7_I1" 168 244
scaffold103908_cov28	RepeatMasker	similarity	1	215	8.4	+	.	Target "Motif:NA_COMP3380_G1_I1" 116 330
scaffold103909_cov28	RepeatMasker	similarity	1	191	5.8	+	.	Target "Motif:NA_COMP3505_G1_I2" 54 244
scaffold103936_cov23	RepeatMasker	similarity	199	409	6.2	-	.	Target "Motif:NA_COMP3023_G1_I1" 1 212
scaffold104009_cov33	RepeatMasker	similarity	199	409	9.9	-	.	Target "Motif:NA_COMP3023_G1_I1" 1 212
scaffold104101_cov18	RepeatMasker	similarity	1	110	10.0	-	.	Target "Motif:NA_COMP3023_G1_I1" 1 111
scaffold104101_cov18	RepeatMasker	similarity	75	285	9.9	-	.	Target "Motif:NA_COMP3023_G1_I1" 1 212
scaffold104335_cov31	RepeatMasker	similarity	1	167	6.6	+	.	Target "Motif:SIMPLE_REPEAT_COMP3612_G1_I1" 356 522
scaffold10434_cov62	RepeatMasker	similarity	1	233	0.0	-	.	Target "Motif:NA_COMP14892_G1_I1" 1 233
scaffold104390_cov31	RepeatMasker	similarity	649	874	0.4	-	.	Target "Motif:SIMPLE_REPEAT_COMP26923_G1_I1" 1 226
scaffold104431_cov46	RepeatMasker	similarity	1	327	1.8	+	.	Target "Motif:NA_COMP3571_G4_I1" 61 387
scaffold104431_cov46	RepeatMasker	similarity	325	628	8.2	-	.	Target "Motif:LINE_COMP3541_G5_I1" 5274 5579
scaffold104431_cov46	RepeatMasker	similarity	1417	1552	9.6	-	.	Target "Motif:NA_COMP3339_G2_I1" 615 750
scaffold104432_cov90	RepeatMasker	similarity	1	380	1.1	-	.	Target "Motif:NA_COMP2545_G1_I1" 3 382
scaffold104434_cov87	RepeatMasker	similarity	1	380	1.1	-	.	Target "Motif:NA_COMP2545_G1_I1" 3 382
scaffold104491_cov18	RepeatMasker	similarity	485	695	9.5	-	.	Target "Motif:NA_COMP3023_G1_I1" 1 212
scaffold104591_cov51	RepeatMasker	similarity	1	496	8.5	+	.	Target "Motif:NA_COMP3548_G1_I1" 767 1260
scaffold104591_cov51	RepeatMasker	similarity	469	925	4.8	+	.	Target "Motif:NA_COMP3548_G1_I1" 108 565
scaffold104630_cov80	RepeatMasker	similarity	206	299	2.1	-	.	Target "Motif:NA_COMP16157_G1_I1" 1 94
scaffold104631_cov97	RepeatMasker	similarity	209	299	2.2	-	.	Target "Motif:NA_COMP16157_G1_I1" 1 91
scaffold104804_cov69	RepeatMasker	similarity	117	541	1.2	+	.	Target "Motif:LINE_COMP3613_G1_I1" 1 425
scaffold104843_cov23	RepeatMasker	similarity	154	364	9.0	-	.	Target "Motif:NA_COMP3023_G1_I1" 1 212
scaffold10511_cov31	RepeatMasker	similarity	407	592	4.9	-	.	Target "Motif:SIMPLE_REPEAT_COMP1859_G2_I1" 184 369
scaffold105398_cov51	RepeatMasker	similarity	389	541	9.1	-	.	Target "Motif:NA_COMP7397_G1_I1" 345 491
scaffold105455_cov31	RepeatMasker	similarity	1	177	9.6	-	.	Target "Motif:NA_COMP3023_G1_I1" 1 179
scaffold105558_cov41	RepeatMasker	similarity	202	673	0.0	+	.	Target "Motif:SIMPLE_REPEAT_COMP35776_G1_I1" 1 472
scaffold105558_cov41	RepeatMasker	similarity	1131	1573	1.1	+	.	Target "Motif:NA_COMP17249_G1_I1" 1 443
scaffold105570_cov85	RepeatMasker	similarity	1	247	2.0	+	.	Target "Motif:SIMPLE_REPEAT_COMP3405_G2_I1" 169 415
scaffold105570_cov85	RepeatMasker	similarity	224	781	5.7	+	.	Target "Motif:LINE_COMP3405_G1_I1" 1 564
scaffold1055_cov61	RepeatMasker	similarity	1	371	4.6	-	.	Target "Motif:NA_COMP3451_G4_I3" 1 374
scaffold1055_cov61	RepeatMasker	similarity	680	1179	9.6	-	.	Target "Motif:NA_COMP3451_G3_I1" 2 501
scaffold1055_cov61	RepeatMasker	similarity	4235	4495	0.0	+	.	Target "Motif:NA_COMP38407_G1_I1" 1 261
scaffold1055_cov61	RepeatMasker	similarity	4471	4655	0.5	-	.	Target "Motif:NA_COMP38407_G1_I2" 77 261
scaffold1055_cov61	RepeatMasker	similarity	12201	12467	0.0	+	.	Target "Motif:NA_COMP8812_G1_I1" 1 267
scaffold1055_cov61	RepeatMasker	similarity	16772	17023	0.0	+	.	Target "Motif:NA_COMP43866_G1_I1" 1 252
scaffold1055_cov61	RepeatMasker	similarity	29909	30326	1.9	+	.	Target "Motif:SIMPLE_REPEAT_COMP36189_G1_I1" 1 418
scaffold1055_cov61	RepeatMasker	similarity	33816	33870	9.1	+	.	Target "Motif:SIMPLE_REPEAT_COMP4112_G1_I1" 51 105
scaffold1055_cov61	RepeatMasker	similarity	35264	35671	0.0	-	.	Target "Motif:SIMPLE_REPEAT_COMP19153_G1_I1" 1 408
scaffold1055_cov61	RepeatMasker	similarity	43864	44374	0.2	-	.	Target "Motif:SIMPLE_REPEAT_COMP5615_G1_I1" 1 511
scaffold1055_cov61	RepeatMasker	similarity	46130	46661	0.0	+	.	Target "Motif:NA_COMP11727_G1_I1" 1 532
scaffold1055_cov61	RepeatMasker	similarity	48746	49057	0.0	+	.	Target "Motif:NA_COMP39975_G1_I1" 1 312
scaffold1055_cov61	RepeatMasker	similarity	52661	52921	0.0	+	.	Target "Motif:NA_COMP12044_G1_I1" 1 261
scaffold1055_cov61	RepeatMasker	similarity	54801	55081	0.0	+	.	Target "Motif:NA_COMP10140_G1_I1" 1 281
scaffold1055_cov61	RepeatMasker	similarity	59301	59858	0.0	+	.	Target "Motif:NA_COMP23462_G1_I1" 1 558
scaffold1055_cov61	RepeatMasker	similarity	70082	70310	0.0	-	.	Target "Motif:NA_COMP50178_G1_I1" 1 229
scaffold1055_cov61	RepeatMasker	similarity	82758	83171	0.5	+	.	Target "Motif:NA_COMP24671_G1_I1" 1 414
scaffold1055_cov61	RepeatMasker	similarity	83277	83874	0.8	+	.	Target "Motif:NA_COMP25139_G1_I1" 1 598
scaffold1055_cov61	RepeatMasker	similarity	86615	86879	0.0	-	.	Target "Motif:NA_COMP25157_G1_I1" 1 265
scaffold1055_cov61	RepeatMasker	similarity	93520	94170	0.1	+	.	Target "Motif:NA_COMP17759_G1_I1" 1 651
scaffold1055_cov61	RepeatMasker	similarity	96029	96279	0.0	-	.	Target "Motif:NA_COMP17786_G1_I1" 1 251
scaffold1055_cov61	RepeatMasker	similarity	104538	104907	1.1	-	.	Target "Motif:NA_COMP26040_G1_I1" 1 370
scaffold1055_cov61	RepeatMasker	similarity	109910	110439	0.4	+	.	Target "Motif:SIMPLE_REPEAT_COMP7085_G1_I1" 1 530
scaffold1055_cov61	RepeatMasker	similarity	110733	111434	0.0	-	.	Target "Motif:LINE_COMP11420_G1_I1" 1 702
scaffold1055_cov61	RepeatMasker	similarity	114842	115258	1.2	+	.	Target "Motif:NA_COMP46551_G1_I1" 1 417
scaffold1055_cov61	RepeatMasker	similarity	115882	116205	0.0	-	.	Target "Motif:NA_COMP39903_G1_I1" 1 324
scaffold1055_cov61	RepeatMasker	similarity	119408	119616	1.4	-	.	Target "Motif:NA_COMP51126_G1_I1" 11 219
scaffold1055_cov61	RepeatMasker	similarity	122586	123105	0.0	-	.	Target "Motif:LTR_COMP32726_G1_I1" 1 520
scaffold1055_cov61	RepeatMasker	similarity	125623	125914	0.0	+	.	Target "Motif:OTHERS_COMP50899_G1_I1" 1 292
scaffold1055_cov61	RepeatMasker	similarity	132279	132544	0.0	-	.	Target "Motif:SIMPLE_REPEAT_COMP18051_G1_I1" 1 266
scaffold1055_cov61	RepeatMasker	similarity	133921	134471	0.0	+	.	Target "Motif:SIMPLE_REPEAT_COMP39969_G1_I1" 1 551
scaffold1055_cov61	RepeatMasker	similarity	139937	140208	0.7	+	.	Target "Motif:SIMPLE_REPEAT_COMP35801_G1_I1" 1 272
scaffold1055_cov61	RepeatMasker	similarity	140371	140622	0.0	-	.	Target "Motif:NA_COMP26357_G1_I1" 1 252
scaffold1055_cov61	RepeatMasker	similarity	141772	142115	0.6	-	.	Target "Motif:NA_COMP20473_G1_I1" 1 344
scaffold1055_cov61	RepeatMasker	similarity	147157	147550	0.2	-	.	Target "Motif:NA_COMP12906_G1_I1" 1 394
scaffold1055_cov61	RepeatMasker	similarity	149062	149329	0.0	-	.	Target "Motif:NA_COMP30191_G1_I1" 1 268
scaffold1055_cov61	RepeatMasker	similarity	151117	151757	0.0	-	.	Target "Motif:NA_COMP11221_G1_I1" 1 641
scaffold1055_cov61	RepeatMasker	similarity	153393	153592	0.0	+	.	Target "Motif:NA_COMP29081_G1_I1" 25 224
scaffold1055_cov61	RepeatMasker	similarity	156678	156952	0.0	-	.	Target "Motif:NA_COMP7832_G1_I1" 1 275
scaffold1055_cov61	RepeatMasker	similarity	167084	167368	0.3	+	.	Target "Motif:NA_COMP8970_G1_I1" 1 285
scaffold1055_cov61	RepeatMasker	similarity	174069	174338	0.7	+	.	Target "Motif:NA_COMP32558_G1_I1" 1 270
scaffold1055_cov61	RepeatMasker	similarity	180631	180876	0.0	+	.	Target "Motif:SIMPLE_REPEAT_COMP44465_G1_I1" 1 246
scaffold1055_cov61	RepeatMasker	similarity	183900	184299	0.2	+	.	Target "Motif:NA_COMP14963_G1_I1" 1 400
scaffold1055_cov61	RepeatMasker	similarity	194978	195227	0.0	+	.	Target "Motif:NA_COMP49971_G1_I1" 1 250
scaffold1055_cov61	RepeatMasker	similarity	198333	198673	0.3	-	.	Target "Motif:NA_COMP16092_G1_I1" 1 341
scaffold1055_cov61	RepeatMasker	similarity	212289	212722	0.0	-	.	Target "Motif:NA_COMP26556_G1_I1" 1 434
scaffold1055_cov61	RepeatMasker	similarity	216489	216751	0.0	+	.	Target "Motif:NA_COMP36000_G1_I1" 1 263
scaffold1055_cov61	RepeatMasker	similarity	218597	219052	0.4	-	.	Target "Motif:NA_COMP36207_G1_I1" 1 456
scaffold1055_cov61	RepeatMasker	similarity	220477	220736	0.8	-	.	Target "Motif:NA_COMP36710_G1_I1" 1 260
scaffold1055_cov61	RepeatMasker	similarity	220816	221125	0.0	+	.	Target "Motif:NA_COMP13495_G1_I1" 1 310
scaffold1055_cov61	RepeatMasker	similarity	223091	223191	2.0	-	.	Target "Motif:SIMPLE_REPEAT_COMP45687_G1_I1" 241 341
scaffold1055_cov61	RepeatMasker	similarity	230383	230846	0.0	-	.	Target "Motif:NA_COMP14920_G1_I1" 1 464
scaffold1055_cov61	RepeatMasker	similarity	231060	231433	0.5	+	.	Target "Motif:NA_COMP5077_G1_I1" 1 374
scaffold1055_cov61	RepeatMasker	similarity	232679	232980	0.0	+	.	Target "Motif:NA_COMP41297_G1_I1" 1 302
scaffold1055_cov61	RepeatMasker	similarity	246214	246455	0.0	-	.	Target "Motif:LTR_COMP15033_G1_I1" 329 570
scaffold1055_cov61	RepeatMasker	similarity	253579	253945	0.8	-	.	Target "Motif:LOW_COMPLEXITY_COMP43485_G1_I1" 1 367
scaffold1055_cov61	RepeatMasker	similarity	275108	275258	2.0	+	.	Target "Motif:LTR_COMP15829_G1_I1" 1 148
scaffold1055_cov61	RepeatMasker	similarity	276917	277178	0.0	-	.	Target "Motif:NA_COMP25931_G1_I1" 1 262
scaffold1055_cov61	RepeatMasker	similarity	277345	277564	0.0	+	.	Target "Motif:SIMPLE_REPEAT_COMP47761_G1_I1" 1 220
scaffold1055_cov61	RepeatMasker	similarity	278309	278558	0.0	+	.	Target "Motif:NA_COMP26272_G1_I1" 1 250
scaffold1055_cov61	RepeatMasker	similarity	290152	290215	3.1	+	.	Target "Motif:OTHERS_COMP3599_G1_I1" 97 160
scaffold1055_cov61	RepeatMasker	similarity	291293	291613	0.3	+	.	Target "Motif:NA_COMP39674_G1_I1" 1 321
scaffold1055_cov61	RepeatMasker	similarity	293229	293492	0.4	-	.	Target "Motif:NA_COMP7679_G1_I1" 1 264
scaffold1055_cov61	RepeatMasker	similarity	308313	308785	0.2	+	.	Target "Motif:NA_COMP14214_G1_I1" 29 501
scaffold1055_cov61	RepeatMasker	similarity	309248	309647	0.0	+	.	Target "Motif:NA_COMP21170_G1_I1" 1 400
scaffold1055_cov61	RepeatMasker	similarity	312316	312581	0.4	-	.	Target "Motif:LTR_COMP45756_G1_I1" 1 266
scaffold1055_cov61	RepeatMasker	similarity	320915	321220	0.0	+	.	Target "Motif:NA_COMP32944_G1_I1" 1 306
scaffold1055_cov61	RepeatMasker	similarity	322618	322870	0.8	+	.	Target "Motif:NA_COMP47456_G1_I1" 1 253
scaffold1055_cov61	RepeatMasker	similarity	344542	344854	0.0	+	.	Target "Motif:NA_COMP28367_G2_I1" 1 313
scaffold1055_cov61	RepeatMasker	similarity	349985	350372	0.0	-	.	Target "Motif:NA_COMP34224_G1_I1" 165 552
scaffold1055_cov61	RepeatMasker	similarity	377852	378579	0.4	+	.	Target "Motif:NA_COMP27436_G1_I1" 1 728
scaffold1055_cov61	RepeatMasker	similarity	379409	380088	0.3	+	.	Target "Motif:NA_COMP9319_G1_I1" 1 680
scaffold105947_cov62	RepeatMasker	similarity	1	614	1.6	-	.	Target "Motif:OTHERS_COMP233_G1_I1" 1 554
scaffold105961_cov62	RepeatMasker	similarity	2661	2976	0.0	-	.	Target "Motif:NA_COMP39874_G1_I1" 1 316
scaffold106110_cov13	RepeatMasker	similarity	256	466	9.9	-	.	Target "Motif:NA_COMP3023_G1_I1" 1 212
scaffold106124_cov80	RepeatMasker	similarity	1	349	1.4	-	.	Target "Motif:NA_COMP4027_G1_I1" 1 349
scaffold106124_cov80	RepeatMasker	similarity	1534	1667	5.3	-	.	Target "Motif:NA_COMP3590_G9_I1" 120 252
scaffold106238_cov38	RepeatMasker	similarity	2613	2807	0.0	-	.	Target "Motif:SIMPLE_REPEAT_COMP34469_G1_I1" 50 244
scaffold106296_cov49	RepeatMasker	similarity	1	330	10.0	+	.	Target "Motif:SIMPLE_REPEAT_COMP3574_G3_I6" 409 728
scaffold106323_cov44	RepeatMasker	similarity	536	734	7.5	-	.	Target "Motif:NA_COMP3477_G7_I1" 162 385
scaffold106427_cov62	RepeatMasker	similarity	257	577	4.1	+	.	Target "Motif:SIMPLE_REPEAT_COMP3612_G1_I1" 1 321
scaffold106428_cov62	RepeatMasker	similarity	257	577	4.1	+	.	Target "Motif:SIMPLE_REPEAT_COMP3612_G1_I1" 1 321
scaffold106483_cov26	RepeatMasker	similarity	1167	1453	1.4	-	.	Target "Motif:NA_COMP46846_G1_I1" 1 287
scaffold106523_cov56	RepeatMasker	similarity	1	671	5.5	-	.	Target "Motif:SIMPLE_REPEAT_COMP2934_G1_I2" 16 687
scaffold106612_cov56	RepeatMasker	similarity	360	794	0.0	-	.	Target "Motif:SIMPLE_REPEAT_COMP21802_G2_I1" 1 435
scaffold106652_cov62	RepeatMasker	similarity	1193	1485	1.0	+	.	Target "Motif:NA_COMP12699_G1_I1" 1 293
scaffold106656_cov31	RepeatMasker	similarity	602	998	0.0	-	.	Target "Motif:SIMPLE_REPEAT_COMP36237_G1_I1" 1 397
scaffold10668_cov59	RepeatMasker	similarity	1	528	0.6	+	.	Target "Motif:LTR_COMP3600_G1_I3" 1571 2098
scaffold1066_cov65	RepeatMasker	similarity	3078	3673	0.2	-	.	Target "Motif:NA_COMP19557_G1_I1" 1 596
scaffold1066_cov65	RepeatMasker	similarity	10596	10975	0.0	-	.	Target "Motif:NA_COMP23554_G1_I1" 1 380
scaffold1066_cov65	RepeatMasker	similarity	14950	15200	0.0	-	.	Target "Motif:SIMPLE_REPEAT_COMP32354_G1_I1" 1 251
scaffold1066_cov65	RepeatMasker	similarity	21140	21346	0.0	-	.	Target "Motif:NA_COMP8165_G1_I1" 1 207
scaffold1066_cov65	RepeatMasker	similarity	31086	31226	7.8	+	.	Target "Motif:OTHERS_COMP3616_G2_I2" 551 691
scaffold1066_cov65	RepeatMasker	similarity	31544	31788	0.0	+	.	Target "Motif:SIMPLE_REPEAT_COMP27236_G1_I1" 451 695
scaffold1066_cov65	RepeatMasker	similarity	34013	34289	0.0	+	.	Target "Motif:NA_COMP26546_G1_I1" 1 277
scaffold1066_cov65	RepeatMasker	similarity	36947	37260	0.3	-	.	Target "Motif:NA_COMP29724_G1_I1" 1 314
scaffold1066_cov65	RepeatMasker	similarity	45764	46192	0.0	-	.	Target "Motif:NA_COMP3742_G1_I1" 1 429
scaffold1066_cov65	RepeatMasker	similarity	56892	57261	0.3	+	.	Target "Motif:NA_COMP49835_G1_I1" 1 370
scaffold1066_cov65	RepeatMasker	similarity	60933	61208	0.0	-	.	Target "Motif:NA_COMP15495_G1_I1" 1 276
scaffold1066_cov65	RepeatMasker	similarity	64523	64784	0.0	+	.	Target "Motif:NA_COMP24286_G1_I1" 1 262
scaffold1066_cov65	RepeatMasker	similarity	65412	65746	0.0	+	.	Target "Motif:NA_COMP42851_G1_I1" 19 353
scaffold1066_cov65	RepeatMasker	similarity	67637	67886	0.0	+	.	Target "Motif:NA_COMP49696_G1_I1" 1 250
scaffold1066_cov65	RepeatMasker	similarity	71789	72054	7.9	+	.	Target "Motif:OTHERS_COMP30665_G1_I1" 1 266
scaffold1066_cov65	RepeatMasker	similarity	74701	74987	0.0	+	.	Target "Motif:NA_COMP20571_G1_I1" 1 287
scaffold1066_cov65	RepeatMasker	similarity	76495	76789	0.0	-	.	Target "Motif:NA_COMP44135_G1_I1" 1 295
scaffold1066_cov65	RepeatMasker	similarity	78916	79139	2.2	+	.	Target "Motif:LOW_COMPLEXITY_COMP21010_G1_I1" 41 264
scaffold1066_cov65	RepeatMasker	similarity	82736	82942	1.0	+	.	Target "Motif:NA_COMP1075_G1_I2" 1 207
scaffold1066_cov65	RepeatMasker	similarity	83443	83585	2.8	+	.	Target "Motif:NA_COMP3222_G1_I3" 276 417
scaffold1066_cov65	RepeatMasker	similarity	84725	84830	3.8	-	.	Target "Motif:NA_COMP3453_G2_I2" 20 125
scaffold1066_cov65	RepeatMasker	similarity	87656	87866	2.9	-	.	Target "Motif:NA_COMP37797_G2_I1" 1 253
scaffold1066_cov65	RepeatMasker	similarity	88074	88389	0.0	-	.	Target "Motif:NA_COMP11504_G2_I1" 1 316
scaffold1066_cov65	RepeatMasker	similarity	97306	97579	0.0	-	.	Target "Motif:NA_COMP48870_G1_I1" 1 274
scaffold1066_cov65	RepeatMasker	similarity	98729	99250	0.0	+	.	Target "Motif:NA_COMP35926_G1_I1" 1 522
scaffold1066_cov65	RepeatMasker	similarity	105247	105535	7.2	+	.	Target "Motif:NA_COMP49433_G1_I1" 1 219
scaffold1066_cov65	RepeatMasker	similarity	105317	105566	8.0	-	.	Target "Motif:NA_COMP3515_G1_I4" 57 307
scaffold1066_cov65	RepeatMasker	similarity	106838	107270	2.5	-	.	Target "Motif:NA_COMP47167_G1_I1" 1 433
scaffold1066_cov65	RepeatMasker	similarity	108547	108893	9.1	-	.	Target "Motif:NA_COMP3591_G3_I4" 25 357
scaffold1066_cov65	RepeatMasker	similarity	108749	108930	6.6	-	.	Target "Motif:NA_COMP3591_G10_I1" 41 223
scaffold1066_cov65	RepeatMasker	similarity	110151	110394	0.0	-	.	Target "Motif:NA_COMP48285_G1_I1" 1 244
scaffold1066_cov65	RepeatMasker	similarity	110410	110516	8.4	+	.	Target "Motif:NA_COMP3441_G1_I10" 37 143
scaffold1066_cov65	RepeatMasker	similarity	110945	111222	0.4	+	.	Target "Motif:NA_COMP47972_G1_I1" 1 278
scaffold1066_cov65	RepeatMasker	similarity	124085	124365	0.0	-	.	Target "Motif:NA_COMP29121_G1_I1" 1 281
scaffold1066_cov65	RepeatMasker	similarity	125287	125843	0.0	-	.	Target "Motif:NA_COMP4042_G1_I1" 1 557
scaffold1066_cov65	RepeatMasker	similarity	126179	126414	8.6	+	.	Target "Motif:NA_COMP957_G1_I1" 18 250
scaffold1066_cov65	RepeatMasker	similarity	130933	131366	0.0	+	.	Target "Motif:NA_COMP4109_G1_I1" 1 434
scaffold1066_cov65	RepeatMasker	similarity	134965	135506	0.0	-	.	Target "Motif:NA_COMP37_G1_I1" 1 542
scaffold1066_cov65	RepeatMasker	similarity	141800	142099	0.0	+	.	Target "Motif:NA_COMP39333_G1_I1" 1 300
scaffold1066_cov65	RepeatMasker	similarity	144098	144319	0.0	-	.	Target "Motif:NA_COMP40340_G1_I1" 18 239
scaffold1066_cov65	RepeatMasker	similarity	148326	148616	0.0	+	.	Target "Motif:NA_COMP30368_G1_I1" 1 291
scaffold1066_cov65	RepeatMasker	similarity	157142	157372	0.0	+	.	Target "Motif:NA_COMP28488_G1_I1" 1 231
scaffold1066_cov65	RepeatMasker	similarity	158880	159198	6.2	-	.	Target "Motif:SIMPLE_REPEAT_COMP37874_G1_I1" 1 278
scaffold1066_cov65	RepeatMasker	similarity	160570	160803	9.7	-	.	Target "Motif:NA_COMP899_G1_I1" 1 220
scaffold1066_cov65	RepeatMasker	similarity	162411	162666	0.4	+	.	Target "Motif:NA_COMP23087_G1_I1" 1 256
scaffold1066_cov65	RepeatMasker	similarity	165124	165423	0.7	-	.	Target "Motif:NA_COMP5582_G1_I1" 1 300
scaffold1066_cov65	RepeatMasker	similarity	168220	168352	8.3	-	.	Target "Motif:NA_COMP3595_G5_I2" 207 339
scaffold1066_cov65	RepeatMasker	similarity	170122	170397	3.6	-	.	Target "Motif:NA_COMP3483_G2_I1" 1 276
scaffold1066_cov65	RepeatMasker	similarity	178140	178424	3.9	+	.	Target "Motif:OTHERS_COMP3540_G9_I2" 191 475
scaffold1066_cov65	RepeatMasker	similarity	179200	179417	8.3	-	.	Target "Motif:NA_COMP3606_G15_I5" 1 217
scaffold1066_cov65	RepeatMasker	similarity	187678	188096	0.0	-	.	Target "Motif:NA_COMP10787_G1_I1" 1 419
scaffold1066_cov65	RepeatMasker	similarity	190801	191580	0.4	+	.	Target "Motif:NA_COMP27248_G1_I1" 1 780
scaffold1066_cov65	RepeatMasker	similarity	191658	191919	1.5	-	.	Target "Motif:OTHERS_COMP427_G1_I2" 1 262
scaffold1066_cov65	RepeatMasker	similarity	194552	194975	0.9	-	.	Target "Motif:NA_COMP40126_G1_I1" 1 424
scaffold1066_cov65	RepeatMasker	similarity	202801	203120	0.0	-	.	Target "Motif:SIMPLE_REPEAT_COMP15902_G1_I1" 1 320
scaffold1066_cov65	RepeatMasker	similarity	203319	203617	0.0	+	.	Target "Motif:NA_COMP49639_G1_I1" 1 299
scaffold1066_cov65	RepeatMasker	similarity	203918	204299	0.0	+	.	Target "Motif:NA_COMP16822_G1_I1" 1 382
scaffold1066_cov65	RepeatMasker	similarity	217104	217357	0.0	-	.	Target "Motif:NA_COMP35843_G1_I1" 1 254
scaffold1066_cov65	RepeatMasker	similarity	217676	217912	0.0	+	.	Target "Motif:NA_COMP48052_G1_I1" 19 255
scaffold1066_cov65	RepeatMasker	similarity	218125	218497	0.8	-	.	Target "Motif:NA_COMP37383_G1_I1" 8 380
scaffold1066_cov65	RepeatMasker	similarity	221669	221921	7.5	+	.	Target "Motif:NA_COMP1821_G1_I1" 1 253
scaffold1066_cov65	RepeatMasker	similarity	225391	225584	6.2	-	.	Target "Motif:NA_COMP3595_G5_I3" 211 404
scaffold1066_cov65	RepeatMasker	similarity	228631	228849	0.0	+	.	Target "Motif:NA_COMP8431_G1_I1" 1 219
scaffold1066_cov65	RepeatMasker	similarity	233534	234408	0.1	-	.	Target "Motif:NA_COMP13391_G1_I1" 1 875
scaffold1066_cov65	RepeatMasker	similarity	238068	238357	0.0	+	.	Target "Motif:NA_COMP27673_G1_I1" 1 290
scaffold1066_cov65	RepeatMasker	similarity	238762	239064	3.6	-	.	Target "Motif:NA_COMP3499_G4_I1" 1 303
scaffold1066_cov65	RepeatMasker	similarity	249921	250220	0.0	+	.	Target "Motif:SIMPLE_REPEAT_COMP50611_G1_I1" 1 300
scaffold1066_cov65	RepeatMasker	similarity	254330	255044	0.0	+	.	Target "Motif:NA_COMP9816_G1_I1" 1 715
scaffold1066_cov65	RepeatMasker	similarity	262769	262998	0.0	+	.	Target "Motif:NA_COMP42094_G1_I1" 1 230
scaffold1066_cov65	RepeatMasker	similarity	268754	269035	0.0	-	.	Target "Motif:NA_COMP14691_G1_I1" 1 282
scaffold1066_cov65	RepeatMasker	similarity	270482	270645	2.5	-	.	Target "Motif:OTHERS_COMP3535_G4_I3" 673 834
scaffold1066_cov65	RepeatMasker	similarity	271527	271672	0.7	+	.	Target "Motif:OTHERS_COMP3535_G3_I2" 711 856
scaffold1066_cov65	RepeatMasker	similarity	271817	272129	0.0	+	.	Target "Motif:NA_COMP30068_G1_I1" 1 313
scaffold1066_cov65	RepeatMasker	similarity	274412	274709	0.3	-	.	Target "Motif:NA_COMP2230_G2_I2" 1 298
scaffold1066_cov65	RepeatMasker	similarity	277277	277606	0.0	-	.	Target "Motif:NA_COMP30497_G1_I1" 16 345
scaffold1066_cov65	RepeatMasker	similarity	280415	280932	0.4	+	.	Target "Motif:NA_COMP34171_G1_I1" 1 518
scaffold1066_cov65	RepeatMasker	similarity	289636	290014	7.9	-	.	Target "Motif:NA_COMP26211_G1_I1" 62 472
scaffold1066_cov65	RepeatMasker	similarity	292906	293178	2.2	-	.	Target "Motif:NA_COMP14987_G1_I1" 14 286
scaffold1066_cov65	RepeatMasker	similarity	297382	297594	9.9	-	.	Target "Motif:OTHERS_COMP2494_G1_I3" 99 320
scaffold1066_cov65	RepeatMasker	similarity	301205	301458	0.0	+	.	Target "Motif:NA_COMP37281_G1_I1" 1 254
scaffold1066_cov65	RepeatMasker	similarity	301743	302001	0.4	-	.	Target "Motif:NA_COMP12925_G1_I1" 1 259
scaffold1066_cov65	RepeatMasker	similarity	304856	305111	0.0	-	.	Target "Motif:NA_COMP5331_G1_I1" 1 256
scaffold1066_cov65	RepeatMasker	similarity	311211	311481	0.0	-	.	Target "Motif:NA_COMP22967_G1_I1" 1 271
scaffold1066_cov65	RepeatMasker	similarity	315040	315302	0.0	-	.	Target "Motif:NA_COMP47388_G1_I1" 14 276
scaffold1066_cov65	RepeatMasker	similarity	327795	328116	0.0	-	.	Target "Motif:NA_COMP50718_G1_I1" 1 322
scaffold1066_cov65	RepeatMasker	similarity	329282	329578	0.0	+	.	Target "Motif:NA_COMP44006_G1_I1" 1 297
scaffold1066_cov65	RepeatMasker	similarity	330901	331144	0.0	+	.	Target "Motif:NA_COMP52_G1_I1" 16 259
scaffold1066_cov65	RepeatMasker	similarity	335931	336386	5.1	-	.	Target "Motif:NA_COMP3202_G3_I1" 1 453
scaffold1066_cov65	RepeatMasker	similarity	340390	341000	0.0	-	.	Target "Motif:NA_COMP16057_G1_I1" 1 611
scaffold1066_cov65	RepeatMasker	similarity	341781	342105	4.3	-	.	Target "Motif:NA_COMP3554_G1_I6" 1 325
scaffold1066_cov65	RepeatMasker	similarity	342904	343044	5.0	-	.	Target "Motif:NA_COMP3453_G1_I1" 284 424
scaffold1066_cov65	RepeatMasker	similarity	344147	344437	0.0	+	.	Target "Motif:NA_COMP30215_G1_I1" 1 291
scaffold1066_cov65	RepeatMasker	similarity	348032	348228	1.0	+	.	Target "Motif:SIMPLE_REPEAT_COMP2868_G4_I1" 370 566
scaffold1066_cov65	RepeatMasker	similarity	348207	348588	0.0	-	.	Target "Motif:SIMPLE_REPEAT_COMP2868_G4_I1" 1 382
scaffold1066_cov65	RepeatMasker	similarity	349546	349708	0.0	-	.	Target "Motif:LOW_COMPLEXITY_COMP14027_G1_I1" 1 163
scaffold1066_cov65	RepeatMasker	similarity	358846	358952	0.0	-	.	Target "Motif:NA_COMP35067_G1_I1" 1 107
scaffold1066_cov65	RepeatMasker	similarity	360973	361379	0.0	+	.	Target "Motif:NA_COMP43520_G1_I1" 1 407
scaffold1066_cov65	RepeatMasker	similarity	362126	362179	9.3	+	.	Target "Motif:OTHERS_COMP3465_G8_I1" 510 564
scaffold1066_cov65	RepeatMasker	similarity	363160	363484	0.0	-	.	Target "Motif:NA_COMP13257_G1_I1" 1 325
scaffold1066_cov65	RepeatMasker	similarity	363898	364155	9.7	+	.	Target "Motif:OTHERS_COMP2096_G1_I3" 122 378
scaffold1066_cov65	RepeatMasker	similarity	369797	370092	6.8	+	.	Target "Motif:NA_COMP3397_G1_I1" 1 296
scaffold106837_cov46	RepeatMasker	similarity	1	499	6.9	-	.	Target "Motif:SIMPLE_REPEAT_COMP26249_G1_I1" 1 494
scaffold1068_cov64	RepeatMasker	similarity	4061	4354	0.0	+	.	Target "Motif:NA_COMP50662_G1_I1" 1 294
scaffold1068_cov64	RepeatMasker	similarity	12250	12858	0.3	+	.	Target "Motif:NA_COMP8502_G1_I1" 1 609
scaffold1068_cov64	RepeatMasker	similarity	22315	22372	5.2	+	.	Target "Motif:NA_COMP3484_G2_I1" 165 224
scaffold1068_cov64	RepeatMasker	similarity	22326	22624	5.8	+	.	Target "Motif:NA_COMP3484_G1_I1" 120 419
scaffold1068_cov64	RepeatMasker	similarity	47913	48886	0.1	+	.	Target "Motif:NA_COMP6117_G1_I1" 1 974
scaffold1068_cov64	RepeatMasker	similarity	60179	60709	0.0	-	.	Target "Motif:NA_COMP19905_G1_I1" 1 531
scaffold1068_cov64	RepeatMasker	similarity	63187	63481	0.3	+	.	Target "Motif:NA_COMP50013_G1_I1" 1 295
scaffold1068_cov64	RepeatMasker	similarity	63520	64062	0.0	-	.	Target "Motif:NA_COMP28693_G1_I1" 1 543
scaffold1068_cov64	RepeatMasker	similarity	68216	68644	0.0	+	.	Target "Motif:NA_COMP5913_G1_I1" 1 429
scaffold1068_cov64	RepeatMasker	similarity	73295	73548	0.0	+	.	Target "Motif:NA_COMP32026_G1_I1" 1 254
scaffold1068_cov64	RepeatMasker	similarity	74362	74632	4.4	-	.	Target "Motif:NA_COMP16971_G1_I1" 1 271
scaffold1068_cov64	RepeatMasker	similarity	76346	76627	0.0	-	.	Target "Motif:NA_COMP10289_G1_I1" 1 282
scaffold1068_cov64	RepeatMasker	similarity	78853	79281	0.2	+	.	Target "Motif:NA_COMP13746_G1_I1" 1 429
scaffold1068_cov64	RepeatMasker	similarity	83291	83874	0.7	-	.	Target "Motif:NA_COMP34409_G1_I1" 1 584
scaffold1068_cov64	RepeatMasker	similarity	97011	97279	0.4	+	.	Target "Motif:NA_COMP44060_G1_I1" 1 269
scaffold1068_cov64	RepeatMasker	similarity	98427	98748	0.0	+	.	Target "Motif:NA_COMP32141_G1_I1" 1 322
scaffold1068_cov64	RepeatMasker	similarity	106245	106557	0.0	+	.	Target "Motif:NA_COMP32652_G1_I1" 1 313
scaffold1068_cov64	RepeatMasker	similarity	107249	107462	0.0	-	.	Target "Motif:NA_COMP51183_G1_I1" 1 214
scaffold1068_cov64	RepeatMasker	similarity	107780	107875	9.9	+	.	Target "Motif:NA_COMP22473_G1_I1" 121 212
scaffold1068_cov64	RepeatMasker	similarity	107791	108039	4.9	-	.	Target "Motif:NA_COMP3440_G3_I1" 5 250
scaffold1068_cov64	RepeatMasker	similarity	108314	108613	0.0	-	.	Target "Motif:NA_COMP5649_G1_I1" 1 297
scaffold1068_cov64	RepeatMasker	similarity	127223	127814	0.2	-	.	Target "Motif:SIMPLE_REPEAT_COMP18088_G1_I1" 1 592
scaffold1068_cov64	RepeatMasker	similarity	132484	132928	1.6	+	.	Target "Motif:NA_COMP13798_G1_I1" 1 455
scaffold1068_cov64	RepeatMasker	similarity	133589	133894	1.0	-	.	Target "Motif:NA_COMP20105_G1_I1" 1 306
scaffold1068_cov64	RepeatMasker	similarity	134008	134388	0.0	-	.	Target "Motif:NA_COMP6637_G1_I1" 1 381
scaffold1068_cov64	RepeatMasker	similarity	143925	144174	0.0	+	.	Target "Motif:NA_COMP33874_G1_I1" 1 250
scaffold1068_cov64	RepeatMasker	similarity	146558	146865	0.3	+	.	Target "Motif:NA_COMP10223_G1_I1" 1 308
scaffold1068_cov64	RepeatMasker	similarity	147887	148106	0.5	+	.	Target "Motif:NA_COMP16676_G1_I1" 1 220
scaffold1068_cov64	RepeatMasker	similarity	148172	148474	0.0	+	.	Target "Motif:NA_COMP38438_G1_I1" 1 303
scaffold1068_cov64	RepeatMasker	similarity	158677	158937	3.8	+	.	Target "Motif:NA_COMP2344_G1_I2" 20 284
scaffold1068_cov64	RepeatMasker	similarity	158858	159396	3.7	+	.	Target "Motif:NA_COMP2344_G1_I1" 1 539
scaffold1068_cov64	RepeatMasker	similarity	164413	164598	8.6	+	.	Target "Motif:NA_COMP3606_G15_I5" 1 192
scaffold1068_cov64	RepeatMasker	similarity	169075	169458	0.5	+	.	Target "Motif:NA_COMP7555_G1_I1" 1 384
scaffold1068_cov64	RepeatMasker	similarity	174553	174774	9.6	+	.	Target "Motif:NA_COMP3410_G11_I1" 1 224
scaffold1068_cov64	RepeatMasker	similarity	179977	180109	5.5	-	.	Target "Motif:NA_COMP3443_G15_I1" 1 128
scaffold1068_cov64	RepeatMasker	similarity	180151	180267	0.0	-	.	Target "Motif:NA_COMP24278_G1_I1" 151 267
scaffold1068_cov64	RepeatMasker	similarity	183377	183585	0.0	-	.	Target "Motif:NA_COMP49882_G1_I1" 1 209
scaffold1068_cov64	RepeatMasker	similarity	187412	187573	8.7	-	.	Target "Motif:SIMPLE_REPEAT_COMP3553_G4_I2" 1 187
scaffold1068_cov64	RepeatMasker	similarity	189080	189384	0.0	+	.	Target "Motif:NA_COMP35465_G1_I1" 1 305
scaffold1068_cov64	RepeatMasker	similarity	191993	192235	4.7	+	.	Target "Motif:NA_COMP3490_G5_I2" 66 302
scaffold1068_cov64	RepeatMasker	similarity	194816	194977	5.6	+	.	Target "Motif:NA_COMP3440_G3_I1" 90 249
scaffold1068_cov64	RepeatMasker	similarity	194986	195214	7.1	-	.	Target "Motif:NA_COMP3507_G8_I3" 24 258
scaffold1068_cov64	RepeatMasker	similarity	198791	199020	1.7	-	.	Target "Motif:NA_COMP3269_G3_I3" 1 233
scaffold1068_cov64	RepeatMasker	similarity	200350	200656	2.9	-	.	Target "Motif:NA_COMP40279_G1_I1" 3 309
scaffold1068_cov64	RepeatMasker	similarity	200683	200924	8.7	-	.	Target "Motif:OTHERS_COMP3540_G9_I2" 202 444
scaffold1068_cov64	RepeatMasker	similarity	212801	213094	8.0	-	.	Target "Motif:NA_COMP2564_G1_I2" 7 307
scaffold1068_cov64	RepeatMasker	similarity	213031	213307	0.4	-	.	Target "Motif:NA_COMP49908_G1_I1" 1 277
scaffold1068_cov64	RepeatMasker	similarity	213401	213683	1.4	+	.	Target "Motif:NA_COMP36769_G1_I1" 1 283
scaffold1068_cov64	RepeatMasker	similarity	217067	217407	0.0	+	.	Target "Motif:NA_COMP33660_G1_I1" 1 341
scaffold1068_cov64	RepeatMasker	similarity	217865	218061	8.2	-	.	Target "Motif:NA_COMP3606_G15_I5" 1 202
scaffold1068_cov64	RepeatMasker	similarity	235035	235169	9.8	+	.	Target "Motif:SIMPLE_REPEAT_COMP3197_G1_I1" 12 149
scaffold1068_cov64	RepeatMasker	similarity	236716	237022	5.3	-	.	Target "Motif:NA_COMP3484_G1_I1" 120 419
scaffold1068_cov64	RepeatMasker	similarity	240841	241053	10.0	+	.	Target "Motif:NA_COMP3529_G11_I1" 114 331
scaffold1068_cov64	RepeatMasker	similarity	241054	241280	9.4	-	.	Target "Motif:SIMPLE_REPEAT_COMP3588_G5_I5" 98 311
scaffold1068_cov64	RepeatMasker	similarity	241899	241985	7.0	-	.	Target "Motif:NA_COMP3281_G5_I1" 137 223
scaffold1068_cov64	RepeatMasker	similarity	242096	242465	0.3	-	.	Target "Motif:NA_COMP3281_G5_I1" 1 370
scaffold1068_cov64	RepeatMasker	similarity	243420	243570	9.3	+	.	Target "Motif:NA_COMP3440_G3_I1" 10 193
scaffold1068_cov64	RepeatMasker	similarity	243769	243833	9.2	+	.	Target "Motif:NA_COMP3440_G3_I1" 190 254
scaffold1068_cov64	RepeatMasker	similarity	245506	245729	6.7	-	.	Target "Motif:NA_COMP3281_G5_I1" 223 422
scaffold1068_cov64	RepeatMasker	similarity	246193	246421	7.4	-	.	Target "Motif:NA_COMP3563_G9_I1" 42 247
scaffold1068_cov64	RepeatMasker	similarity	248839	249064	10.0	+	.	Target "Motif:NA_COMP3593_G5_I2" 125 347
scaffold1068_cov64	RepeatMasker	similarity	255686	255801	7.8	+	.	Target "Motif:NA_COMP3483_G3_I3" 22 153
scaffold1068_cov64	RepeatMasker	similarity	267982	268316	0.0	-	.	Target "Motif:NA_COMP29111_G1_I1" 1 335
scaffold1068_cov64	RepeatMasker	similarity	274493	274559	4.5	-	.	Target "Motif:NA_COMP3281_G8_I1" 178 247
scaffold1068_cov64	RepeatMasker	similarity	274638	274840	9.8	+	.	Target "Motif:NA_COMP3559_G1_I1" 63 265
scaffold1068_cov64	RepeatMasker	similarity	275557	275778	8.1	-	.	Target "Motif:NA_COMP3526_G5_I5" 78 325
scaffold1068_cov64	RepeatMasker	similarity	275997	276299	0.0	+	.	Target "Motif:NA_COMP24702_G1_I1" 1 303
scaffold1068_cov64	RepeatMasker	similarity	276779	276941	6.9	-	.	Target "Motif:NA_COMP3588_G5_I2" 66 228
scaffold1068_cov64	RepeatMasker	similarity	279431	279540	7.9	-	.	Target "Motif:SIMPLE_REPEAT_COMP3588_G5_I5" 83 188
scaffold1068_cov64	RepeatMasker	similarity	279431	279526	7.3	-	.	Target "Motif:NA_COMP3588_G5_I2" 68 165
scaffold1068_cov64	RepeatMasker	similarity	279596	279831	4.8	+	.	Target "Motif:NA_COMP3507_G8_I3" 24 258
scaffold1068_cov64	RepeatMasker	similarity	279840	280037	5.6	-	.	Target "Motif:NA_COMP3440_G3_I1" 12 249
scaffold1068_cov64	RepeatMasker	similarity	279989	280228	0.8	-	.	Target "Motif:NA_COMP3555_G11_I1" 1 240
scaffold1068_cov64	RepeatMasker	similarity	284187	284378	7.8	+	.	Target "Motif:NA_COMP3240_G1_I1" 59 254
scaffold1068_cov64	RepeatMasker	similarity	284299	284529	8.0	+	.	Target "Motif:NA_COMP3606_G15_I5" 1 233
scaffold1068_cov64	RepeatMasker	similarity	285125	285270	6.8	-	.	Target "Motif:NA_COMP3553_G2_I5" 267 419
scaffold1068_cov64	RepeatMasker	similarity	285960	286131	9.9	-	.	Target "Motif:NA_COMP629_G1_I1" 2 185
scaffold1068_cov64	RepeatMasker	similarity	290259	290382	9.8	-	.	Target "Motif:NA_COMP3507_G8_I2" 3 126
scaffold1068_cov64	RepeatMasker	similarity	297685	297896	9.9	-	.	Target "Motif:NA_COMP2720_G1_I1" 206 446
scaffold1068_cov64	RepeatMasker	similarity	297925	298114	5.9	+	.	Target "Motif:NA_COMP3583_G2_I3" 232 467
scaffold1068_cov64	RepeatMasker	similarity	298955	299223	0.0	+	.	Target "Motif:SIMPLE_REPEAT_COMP31482_G1_I1" 1 269
scaffold1068_cov64	RepeatMasker	similarity	300220	300448	7.0	-	.	Target "Motif:NA_COMP3440_G3_I1" 13 250
scaffold1068_cov64	RepeatMasker	similarity	301256	301671	0.0	+	.	Target "Motif:NA_COMP44990_G1_I1" 1 416
scaffold1068_cov64	RepeatMasker	similarity	304818	305254	3.4	+	.	Target "Motif:NA_COMP24428_G1_I1" 1 437
scaffold1068_cov64	RepeatMasker	similarity	305581	305970	0.0	+	.	Target "Motif:NA_COMP19355_G1_I1" 1 390
scaffold1068_cov64	RepeatMasker	similarity	307688	307879	9.9	-	.	Target "Motif:NA_COMP3525_G3_I1" 191 393
scaffold1068_cov64	RepeatMasker	similarity	307884	308228	0.0	-	.	Target "Motif:NA_COMP26682_G1_I1" 1 345
scaffold1068_cov64	RepeatMasker	similarity	308593	308822	5.7	-	.	Target "Motif:NA_COMP3507_G2_I1" 148 394
scaffold1068_cov64	RepeatMasker	similarity	310174	310375	7.9	+	.	Target "Motif:NA_COMP3498_G12_I1" 430 635
scaffold1068_cov64	RepeatMasker	similarity	316969	317174	7.3	+	.	Target "Motif:NA_COMP3498_G12_I1" 67 273
scaffold1068_cov64	RepeatMasker	similarity	318275	318475	8.0	+	.	Target "Motif:NA_COMP3325_G3_I2" 41 250
scaffold1068_cov64	RepeatMasker	similarity	318913	319134	9.9	+	.	Target "Motif:NA_COMP3601_G11_I8" 3 253
scaffold1068_cov64	RepeatMasker	similarity	324251	324317	9.0	-	.	Target "Motif:NA_COMP3441_G1_I8" 167 236
scaffold1068_cov64	RepeatMasker	similarity	324820	325007	9.6	-	.	Target "Motif:OTHERS_COMP3572_G19_I1" 32 226
scaffold1068_cov64	RepeatMasker	similarity	325245	325734	0.8	+	.	Target "Motif:SIMPLE_REPEAT_COMP21222_G1_I1" 1 490
scaffold1068_cov64	RepeatMasker	similarity	327084	327146	7.9	+	.	Target "Motif:NA_COMP34287_G1_I1" 3 65
scaffold1068_cov64	RepeatMasker	similarity	327141	327196	5.4	+	.	Target "Motif:NA_COMP34287_G1_I1" 3 59
scaffold1068_cov64	RepeatMasker	similarity	327197	327782	0.0	+	.	Target "Motif:NA_COMP34287_G1_I1" 3 588
scaffold1068_cov64	RepeatMasker	similarity	327939	328257	0.6	-	.	Target "Motif:NA_COMP40579_G1_I1" 1 319
scaffold1068_cov64	RepeatMasker	similarity	331678	331859	8.3	-	.	Target "Motif:NA_COMP3009_G1_I1" 183 365
scaffold1068_cov64	RepeatMasker	similarity	333631	333796	9.9	-	.	Target "Motif:NA_COMP3595_G5_I3" 249 429
scaffold1068_cov64	RepeatMasker	similarity	335490	335680	3.1	+	.	Target "Motif:NA_COMP3520_G4_I3" 139 337
scaffold1068_cov64	RepeatMasker	similarity	335576	335704	6.3	+	.	Target "Motif:NA_COMP3520_G4_I2" 61 190
scaffold1068_cov64	RepeatMasker	similarity	335674	335975	0.0	-	.	Target "Motif:NA_COMP31604_G1_I1" 1 302
scaffold1068_cov64	RepeatMasker	similarity	336846	336958	8.8	+	.	Target "Motif:NA_COMP3458_G4_I4" 27 142
scaffold1068_cov64	RepeatMasker	similarity	340257	340326	10.0	-	.	Target "Motif:NA_COMP3498_G12_I1" 64 133
scaffold1068_cov64	RepeatMasker	similarity	340364	340489	8.1	-	.	Target "Motif:NA_COMP3313_G2_I1" 264 386
scaffold1068_cov64	RepeatMasker	similarity	340438	340648	0.9	-	.	Target "Motif:NA_COMP3443_G22_I1" 1 211
scaffold1068_cov64	RepeatMasker	similarity	340487	340671	8.1	-	.	Target "Motif:SIMPLE_REPEAT_COMP3443_G14_I1" 1 185
scaffold1068_cov64	RepeatMasker	similarity	343303	343354	9.6	-	.	Target "Motif:NA_COMP12387_G1_I1" 187 238
scaffold1068_cov64	RepeatMasker	similarity	345990	346261	9.4	+	.	Target "Motif:SIMPLE_REPEAT_COMP3588_G5_I5" 98 361
scaffold1068_cov64	RepeatMasker	similarity	348979	349168	8.1	-	.	Target "Motif:LTR_COMP3490_G11_I1" 38 225
scaffold1068_cov64	RepeatMasker	similarity	349334	349558	6.7	+	.	Target "Motif:NA_COMP3410_G11_I1" 1 224
scaffold1068_cov64	RepeatMasker	similarity	350400	350541	6.3	-	.	Target "Motif:NA_COMP38777_G1_I1" 105 246
scaffold1068_cov64	RepeatMasker	similarity	350493	350738	0.0	-	.	Target "Motif:NA_COMP38777_G1_I1" 1 246
scaffold1068_cov64	RepeatMasker	similarity	353483	353649	9.0	-	.	Target "Motif:LTR_COMP3549_G16_I1" 206 383
scaffold1068_cov64	RepeatMasker	similarity	353877	354103	0.0	-	.	Target "Motif:NA_COMP2185_G1_I1" 1 227
scaffold1068_cov64	RepeatMasker	similarity	355966	356236	0.0	-	.	Target "Motif:NA_COMP36883_G1_I1" 1 271
scaffold1068_cov64	RepeatMasker	similarity	360381	360451	7.1	-	.	Target "Motif:NA_COMP3606_G15_I5" 129 198
scaffold1068_cov64	RepeatMasker	similarity	360594	360804	0.0	-	.	Target "Motif:NA_COMP42142_G1_I1" 1 211
scaffold1068_cov64	RepeatMasker	similarity	362115	362313	6.5	-	.	Target "Motif:NA_COMP3501_G5_I2" 388 586
scaffold1068_cov64	RepeatMasker	similarity	362412	362708	6.8	-	.	Target "Motif:NA_COMP3453_G2_I2" 19 327
scaffold1068_cov64	RepeatMasker	similarity	362710	362913	7.3	-	.	Target "Motif:NA_COMP3501_G5_I1" 10 233
scaffold1068_cov64	RepeatMasker	similarity	364039	364321	0.3	-	.	Target "Motif:NA_COMP44684_G1_I1" 1 283
scaffold1068_cov64	RepeatMasker	similarity	364502	364757	0.8	-	.	Target "Motif:NA_COMP46640_G1_I1" 1 256
scaffold1068_cov64	RepeatMasker	similarity	365322	365573	0.0	+	.	Target "Motif:NA_COMP32566_G1_I1" 1 252
scaffold1068_cov64	RepeatMasker	similarity	371302	371417	6.9	+	.	Target "Motif:NA_COMP3599_G9_I7" 89 207
scaffold1068_cov64	RepeatMasker	similarity	371319	371543	10.0	-	.	Target "Motif:NA_COMP3410_G11_I1" 1 224
scaffold1068_cov64	RepeatMasker	similarity	373982	374235	5.6	+	.	Target "Motif:NA_COMP3601_G11_I3" 3 253
scaffold1068_cov64	RepeatMasker	similarity	374401	374563	9.2	-	.	Target "Motif:NA_COMP3563_G9_I1" 39 245
scaffold1068_cov64	RepeatMasker	similarity	377231	377925	0.1	+	.	Target "Motif:NA_COMP30774_G1_I1" 1 695
scaffold1068_cov64	RepeatMasker	similarity	379427	379639	0.0	-	.	Target "Motif:NA_COMP12020_G1_I1" 1 213
scaffold1068_cov64	RepeatMasker	similarity	379610	379836	8.9	-	.	Target "Motif:NA_COMP3507_G2_I1" 178 401
scaffold1068_cov64	RepeatMasker	similarity	379833	380123	2.4	+	.	Target "Motif:NA_COMP3431_G3_I1" 34 324
scaffold1068_cov64	RepeatMasker	similarity	381109	381233	9.8	-	.	Target "Motif:SIMPLE_REPEAT_COMP3467_G3_I6" 443 565
scaffold1068_cov64	RepeatMasker	similarity	383287	383501	6.5	+	.	Target "Motif:NA_COMP2795_G1_I1" 1 221
scaffold1068_cov64	RepeatMasker	similarity	383427	383662	0.8	-	.	Target "Motif:NA_COMP21721_G1_I1" 180 415
scaffold1068_cov64	RepeatMasker	similarity	383653	384004	0.6	-	.	Target "Motif:NA_COMP21721_G1_I1" 1 352
scaffold1068_cov64	RepeatMasker	similarity	388493	388714	7.2	-	.	Target "Motif:NA_COMP3559_G1_I2" 281 502
scaffold1068_cov64	RepeatMasker	similarity	389475	389531	3.6	-	.	Target "Motif:NA_COMP3557_G7_I3" 35 89
scaffold1068_cov64	RepeatMasker	similarity	389486	389531	0.0	-	.	Target "Motif:NA_COMP3557_G7_I4" 35 80
scaffold1068_cov64	RepeatMasker	similarity	389603	389989	0.0	-	.	Target "Motif:NA_COMP3549_G27_I1" 1 387
scaffold1068_cov64	RepeatMasker	similarity	390353	390459	7.5	+	.	Target "Motif:NA_COMP3440_G3_I1" 152 261
scaffold1068_cov64	RepeatMasker	similarity	391056	391240	4.3	-	.	Target "Motif:NA_COMP3606_G15_I5" 1 192
scaffold1068_cov64	RepeatMasker	similarity	395408	395645	0.0	+	.	Target "Motif:NA_COMP3520_G5_I1" 1 238
scaffold1068_cov64	RepeatMasker	similarity	396417	396701	0.7	+	.	Target "Motif:SIMPLE_REPEAT_COMP18784_G1_I1" 1 285
scaffold1068_cov64	RepeatMasker	similarity	400469	400587	6.0	+	.	Target "Motif:NA_COMP3507_G2_I5" 66 185
scaffold1068_cov64	RepeatMasker	similarity	400599	400823	8.1	-	.	Target "Motif:NA_COMP3582_G4_I7" 21 243
scaffold1068_cov64	RepeatMasker	similarity	400823	400949	5.5	+	.	Target "Motif:NA_COMP3507_G2_I1" 273 407
scaffold1068_cov64	RepeatMasker	similarity	402586	402699	8.8	+	.	Target "Motif:NA_COMP20956_G1_I1" 1 116
scaffold1068_cov64	RepeatMasker	similarity	402719	403214	0.6	+	.	Target "Motif:NA_COMP20956_G1_I1" 1 496
scaffold1068_cov64	RepeatMasker	similarity	404871	405117	7.3	-	.	Target "Motif:NA_COMP3507_G2_I1" 149 396
scaffold1068_cov64	RepeatMasker	similarity	405079	405402	0.6	+	.	Target "Motif:NA_COMP3431_G3_I1" 1 324
scaffold1068_cov64	RepeatMasker	similarity	406025	406200	7.4	+	.	Target "Motif:NA_COMP3362_G3_I2" 258 440
scaffold1068_cov64	RepeatMasker	similarity	406351	406539	9.0	+	.	Target "Motif:NA_COMP3362_G3_I6" 92 292
scaffold1068_cov64	RepeatMasker	similarity	408373	408535	6.8	-	.	Target "Motif:SIMPLE_REPEAT_COMP3553_G4_I2" 1 163
scaffold1068_cov64	RepeatMasker	similarity	415557	415778	0.0	+	.	Target "Motif:NA_COMP42872_G1_I1" 20 241
scaffold1068_cov64	RepeatMasker	similarity	417872	418167	6.8	-	.	Target "Motif:NA_COMP47413_G1_I1" 1 298
scaffold1068_cov64	RepeatMasker	similarity	418181	418388	6.8	-	.	Target "Motif:NA_COMP3563_G9_I1" 42 247
scaffold1068_cov64	RepeatMasker	similarity	418546	418978	9.2	-	.	Target "Motif:SIMPLE_REPEAT_COMP3532_G2_I3" 1 478
scaffold1068_cov64	RepeatMasker	similarity	425193	425398	5.9	-	.	Target "Motif:OTHERS_COMP3569_G9_I3" 297 500
scaffold1068_cov64	RepeatMasker	similarity	425498	425815	4.1	-	.	Target "Motif:NA_COMP3498_G12_I1" 61 397
scaffold1068_cov64	RepeatMasker	similarity	425909	426060	8.6	+	.	Target "Motif:NA_COMP3565_G3_I6" 241 400
scaffold1068_cov64	RepeatMasker	similarity	426403	426481	3.8	-	.	Target "Motif:NA_COMP3498_G12_I1" 66 144
scaffold1068_cov64	RepeatMasker	similarity	428654	428986	4.5	+	.	Target "Motif:NA_COMP3498_G12_I1" 61 400
scaffold1068_cov64	RepeatMasker	similarity	428954	429167	0.0	-	.	Target "Motif:SIMPLE_REPEAT_COMP48675_G1_I1" 1 214
scaffold1068_cov64	RepeatMasker	similarity	430229	430488	0.0	-	.	Target "Motif:NA_COMP3564_G6_I1" 1 260
scaffold1068_cov64	RepeatMasker	similarity	431153	431361	4.8	+	.	Target "Motif:NA_COMP3477_G7_I1" 160 385
scaffold1068_cov64	RepeatMasker	similarity	433411	433610	7.0	-	.	Target "Motif:NA_COMP3498_G12_I1" 430 636
scaffold1068_cov64	RepeatMasker	similarity	433778	433964	8.0	-	.	Target "Motif:NA_COMP3563_G9_I1" 42 247
scaffold1068_cov64	RepeatMasker	similarity	435452	435715	0.4	+	.	Target "Motif:NA_COMP1410_G1_I1" 14 277
scaffold1068_cov64	RepeatMasker	similarity	437494	437697	7.3	+	.	Target "Motif:NA_COMP3526_G12_I2" 193 399
scaffold1068_cov64	RepeatMasker	similarity	439241	439428	8.8	+	.	Target "Motif:NA_COMP3599_G9_I2" 22 206
scaffold1068_cov64	RepeatMasker	similarity	439274	439499	7.2	-	.	Target "Motif:NA_COMP3410_G11_I1" 1 224
scaffold1068_cov64	RepeatMasker	similarity	439800	440082	0.0	+	.	Target "Motif:NA_COMP37494_G1_I1" 1 283
scaffold1068_cov64	RepeatMasker	similarity	440163	440244	8.8	+	.	Target "Motif:NA_COMP37494_G1_I1" 204 283
scaffold1068_cov64	RepeatMasker	similarity	440540	440742	7.5	-	.	Target "Motif:NA_COMP3563_G9_I1" 42 247
scaffold1068_cov64	RepeatMasker	similarity	450059	450500	7.8	+	.	Target "Motif:NA_COMP3566_G4_I6" 51 531
scaffold1068_cov64	RepeatMasker	similarity	450319	450545	3.1	+	.	Target "Motif:NA_COMP3556_G1_I12" 1 261
scaffold1068_cov64	RepeatMasker	similarity	453536	453808	5.0	+	.	Target "Motif:NA_COMP8273_G1_I1" 30 297
scaffold1068_cov64	RepeatMasker	similarity	453672	453978	1.7	+	.	Target "Motif:NA_COMP8273_G1_I1" 1 297
scaffold1068_cov64	RepeatMasker	similarity	453852	454161	5.1	+	.	Target "Motif:NA_COMP8273_G1_I1" 1 297
scaffold1068_cov64	RepeatMasker	similarity	454022	454233	7.1	+	.	Target "Motif:NA_COMP8273_G1_I1" 1 199
scaffold1068_cov64	RepeatMasker	similarity	454611	454907	0.3	-	.	Target "Motif:NA_COMP28306_G1_I1" 1 297
scaffold1068_cov64	RepeatMasker	similarity	455052	455274	0.9	+	.	Target "Motif:NA_COMP2237_G1_I2" 1 223
scaffold1068_cov64	RepeatMasker	similarity	455295	455364	7.5	+	.	Target "Motif:NA_COMP3522_G8_I1" 1 70
scaffold1068_cov64	RepeatMasker	similarity	455345	455556	6.7	-	.	Target "Motif:NA_COMP3559_G1_I2" 267 479
scaffold1068_cov64	RepeatMasker	similarity	455537	455695	8.8	+	.	Target "Motif:NA_COMP3522_G6_I1" 49 220
scaffold1068_cov64	RepeatMasker	similarity	458348	458557	9.1	-	.	Target "Motif:NA_COMP3402_G5_I2" 111 338
scaffold1068_cov64	RepeatMasker	similarity	460395	460854	0.2	+	.	Target "Motif:NA_COMP18474_G1_I1" 3 462
scaffold1068_cov64	RepeatMasker	similarity	462200	462382	1.1	-	.	Target "Motif:NA_COMP3493_G14_I1" 1 183
scaffold1068_cov64	RepeatMasker	similarity	462334	462547	9.3	+	.	Target "Motif:NA_COMP3440_G3_I1" 18 249
scaffold1068_cov64	RepeatMasker	similarity	463903	464369	0.0	-	.	Target "Motif:NA_COMP27708_G1_I1" 1 467
scaffold1068_cov64	RepeatMasker	similarity	464507	464849	8.3	+	.	Target "Motif:NA_COMP3591_G3_I4" 26 354
scaffold1068_cov64	RepeatMasker	similarity	464848	465002	6.2	-	.	Target "Motif:NA_COMP3507_G2_I1" 122 282
scaffold1068_cov64	RepeatMasker	similarity	464848	464981	6.8	-	.	Target "Motif:NA_COMP3507_G2_I5" 59 197
scaffold1068_cov64	RepeatMasker	similarity	464922	465126	0.5	+	.	Target "Motif:NA_COMP646_G2_I1" 1 205
scaffold1068_cov64	RepeatMasker	similarity	465248	465572	0.0	+	.	Target "Motif:NA_COMP3438_G13_I1" 51 375
scaffold1068_cov64	RepeatMasker	similarity	465813	466262	8.3	-	.	Target "Motif:NA_COMP38357_G1_I1" 76 526
scaffold1068_cov64	RepeatMasker	similarity	466375	466547	5.8	+	.	Target "Motif:NA_COMP3606_G15_I5" 1 173
scaffold1068_cov64	RepeatMasker	similarity	467261	467494	5.6	+	.	Target "Motif:NA_COMP3440_G3_I1" 13 249
scaffold1068_cov64	RepeatMasker	similarity	469534	470109	0.0	+	.	Target "Motif:LTR_COMP3487_G14_I1" 1 576
scaffold1068_cov64	RepeatMasker	similarity	470485	470565	3.9	+	.	Target "Motif:NA_COMP3498_G12_I1" 61 138
scaffold1068_cov64	RepeatMasker	similarity	470559	470615	5.3	+	.	Target "Motif:NA_COMP3498_G12_I1" 377 433
scaffold1068_cov64	RepeatMasker	similarity	473783	473938	9.9	-	.	Target "Motif:NA_COMP3556_G1_I3" 38 180
scaffold1068_cov64	RepeatMasker	similarity	473822	474037	2.8	-	.	Target "Motif:NA_COMP3556_G1_I12" 1 263
scaffold1068_cov64	RepeatMasker	similarity	473871	474297	5.2	-	.	Target "Motif:NA_COMP3566_G4_I6" 51 531
scaffold1068_cov64	RepeatMasker	similarity	476199	476380	3.9	+	.	Target "Motif:NA_COMP3402_G7_I1" 1 182
scaffold1068_cov64	RepeatMasker	similarity	476278	476461	6.5	-	.	Target "Motif:NA_COMP893_G1_I1" 1 184
scaffold1068_cov64	RepeatMasker	similarity	476307	476655	7.6	-	.	Target "Motif:NA_COMP893_G1_I1" 1 342
scaffold1068_cov64	RepeatMasker	similarity	476404	476752	9.9	-	.	Target "Motif:NA_COMP893_G1_I1" 1 342
scaffold1068_cov64	RepeatMasker	similarity	477537	477817	9.6	+	.	Target "Motif:NA_COMP268_G1_I1" 1 281
scaffold1068_cov64	RepeatMasker	similarity	477830	477948	4.2	-	.	Target "Motif:NA_COMP268_G1_I1" 1 120
scaffold1068_cov64	RepeatMasker	similarity	477858	478151	0.0	-	.	Target "Motif:NA_COMP268_G1_I1" 1 294
scaffold1068_cov64	RepeatMasker	similarity	478061	478288	9.7	-	.	Target "Motif:NA_COMP268_G1_I1" 67 294
scaffold1068_cov64	RepeatMasker	similarity	479036	479176	6.8	-	.	Target "Motif:NA_COMP13185_G1_I1" 214 334
scaffold1068_cov64	RepeatMasker	similarity	479231	479564	0.0	-	.	Target "Motif:NA_COMP13185_G1_I1" 1 334
scaffold1068_cov64	RepeatMasker	similarity	480963	481072	7.3	+	.	Target "Motif:NA_COMP893_G1_I1" 9 122
scaffold1068_cov64	RepeatMasker	similarity	481049	481244	0.0	-	.	Target "Motif:NA_COMP24178_G1_I1" 20 215
scaffold1068_cov64	RepeatMasker	similarity	481858	482260	6.2	-	.	Target "Motif:SIMPLE_REPEAT_COMP3448_G17_I2" 146 546
scaffold1068_cov64	RepeatMasker	similarity	483905	484583	4.3	+	.	Target "Motif:OTHERS_COMP3616_G2_I1" 1 693
scaffold1068_cov64	RepeatMasker	similarity	488513	488652	8.0	-	.	Target "Motif:NA_COMP3588_G5_I2" 46 228
scaffold1068_cov64	RepeatMasker	similarity	488598	488821	0.0	+	.	Target "Motif:NA_COMP37653_G1_I1" 1 224
scaffold1068_cov64	RepeatMasker	similarity	489727	489952	0.4	-	.	Target "Motif:NA_COMP3532_G1_I1" 1 226
scaffold1068_cov64	RepeatMasker	similarity	489953	490397	7.7	-	.	Target "Motif:SIMPLE_REPEAT_COMP3532_G2_I3" 1 478
scaffold1068_cov64	RepeatMasker	similarity	497664	497716	5.7	-	.	Target "Motif:NA_COMP3498_G12_I1" 377 429
scaffold1068_cov64	RepeatMasker	similarity	497710	497785	5.3	-	.	Target "Motif:NA_COMP3498_G12_I1" 63 138
scaffold1068_cov64	RepeatMasker	similarity	498805	499056	0.0	-	.	Target "Motif:NA_COMP14696_G1_I1" 1 252
scaffold1068_cov64	RepeatMasker	similarity	499551	499858	0.0	+	.	Target "Motif:NA_COMP18902_G1_I1" 1 308
scaffold1068_cov64	RepeatMasker	similarity	500271	500574	0.0	-	.	Target "Motif:NA_COMP42974_G1_I1" 1 304
scaffold1068_cov64	RepeatMasker	similarity	503640	504024	0.0	+	.	Target "Motif:NA_COMP17985_G1_I1" 1 385
scaffold1068_cov64	RepeatMasker	similarity	504046	504503	0.0	+	.	Target "Motif:NA_COMP27273_G1_I1" 1 458
scaffold1068_cov64	RepeatMasker	similarity	504812	505122	0.6	-	.	Target "Motif:NA_COMP38619_G1_I1" 1 311
scaffold1068_cov64	RepeatMasker	similarity	510082	510380	0.0	-	.	Target "Motif:NA_COMP40678_G1_I1" 1 299
scaffold1068_cov64	RepeatMasker	similarity	515278	515586	3.9	+	.	Target "Motif:NA_COMP17932_G1_I1" 1 312
scaffold1068_cov64	RepeatMasker	similarity	519874	520151	5.4	+	.	Target "Motif:NA_COMP13234_G1_I1" 2 279
scaffold1068_cov64	RepeatMasker	similarity	523040	523499	0.0	-	.	Target "Motif:NA_COMP835_G1_I1" 1 460
scaffold1068_cov64	RepeatMasker	similarity	529878	530114	9.0	-	.	Target "Motif:SIMPLE_REPEAT_COMP3588_G5_I5" 96 319
scaffold1068_cov64	RepeatMasker	similarity	530202	530548	2.9	-	.	Target "Motif:OTHERS_COMP3500_G1_I6" 15 358
scaffold1068_cov64	RepeatMasker	similarity	533358	533905	0.0	-	.	Target "Motif:NA_COMP4090_G1_I1" 204 751
scaffold1068_cov64	RepeatMasker	similarity	534039	534247	9.6	+	.	Target "Motif:NA_COMP4090_G1_I1" 1 209
scaffold1068_cov64	RepeatMasker	similarity	537639	538170	0.0	-	.	Target "Motif:NA_COMP8072_G1_I1" 1 532
scaffold1068_cov64	RepeatMasker	similarity	543182	543491	0.0	-	.	Target "Motif:NA_COMP23655_G1_I1" 1 310
scaffold1068_cov64	RepeatMasker	similarity	550650	550828	8.4	-	.	Target "Motif:NA_COMP3566_G6_I1" 1 220
scaffold1068_cov64	RepeatMasker	similarity	557286	557763	0.0	-	.	Target "Motif:SIMPLE_REPEAT_COMP6896_G1_I1" 1 478
scaffold1068_cov64	RepeatMasker	similarity	558406	558611	9.7	-	.	Target "Motif:NA_COMP3498_G12_I1" 427 636
scaffold1068_cov64	RepeatMasker	similarity	562774	563048	0.7	+	.	Target "Motif:NA_COMP3595_G9_I1" 1 275
scaffold1068_cov64	RepeatMasker	similarity	564761	564941	6.6	+	.	Target "Motif:NA_COMP3501_G11_I2" 396 576
scaffold1068_cov64	RepeatMasker	similarity	566048	566113	9.1	+	.	Target "Motif:NA_COMP3325_G3_I2" 32 97
scaffold1068_cov64	RepeatMasker	similarity	567900	568126	4.4	+	.	Target "Motif:OTHERS_COMP3616_G1_I2" 6 232
scaffold1068_cov64	RepeatMasker	similarity	568127	568261	8.3	+	.	Target "Motif:NA_COMP3501_G12_I1" 113 245
scaffold1068_cov64	RepeatMasker	similarity	569762	570231	0.6	-	.	Target "Motif:NA_COMP1008_G1_I2" 1 470
scaffold1068_cov64	RepeatMasker	similarity	570576	570633	8.6	-	.	Target "Motif:NA_COMP38326_G1_I1" 233 290
scaffold1068_cov64	RepeatMasker	similarity	570798	571087	0.0	-	.	Target "Motif:NA_COMP38326_G1_I1" 1 290
scaffold1068_cov64	RepeatMasker	similarity	573462	573902	0.5	+	.	Target "Motif:NA_COMP1400_G1_I1" 1 441
scaffold1068_cov64	RepeatMasker	similarity	574005	574130	4.0	+	.	Target "Motif:NA_COMP1400_G1_I1" 323 448
scaffold1068_cov64	RepeatMasker	similarity	574592	574817	8.8	-	.	Target "Motif:NA_COMP3477_G7_I1" 164 389
scaffold1068_cov64	RepeatMasker	similarity	574768	574942	4.0	-	.	Target "Motif:NA_COMP2306_G1_I2" 1 175
scaffold1068_cov64	RepeatMasker	similarity	575006	575282	0.0	-	.	Target "Motif:NA_COMP8469_G1_I1" 1 277
scaffold1068_cov64	RepeatMasker	similarity	576025	576291	4.1	-	.	Target "Motif:OTHERS_COMP3616_G1_I2" 1 267
scaffold1068_cov64	RepeatMasker	similarity	576267	576351	3.5	+	.	Target "Motif:OTHERS_COMP3616_G2_I2" 1 85
scaffold1068_cov64	RepeatMasker	similarity	581657	581862	9.4	-	.	Target "Motif:NA_COMP3410_G11_I1" 1 220
scaffold1068_cov64	RepeatMasker	similarity	582154	582398	9.0	-	.	Target "Motif:NA_COMP3546_G1_I3" 136 370
scaffold1068_cov64	RepeatMasker	similarity	584951	585154	0.0	-	.	Target "Motif:SIMPLE_REPEAT_COMP49731_G1_I1" 1 204
scaffold1068_cov64	RepeatMasker	similarity	585129	585279	8.0	-	.	Target "Motif:NA_COMP3528_G10_I1" 15 172
scaffold1068_cov64	RepeatMasker	similarity	585294	585473	8.9	+	.	Target "Motif:NA_COMP3604_G3_I2" 23 202
scaffold1068_cov64	RepeatMasker	similarity	586840	587074	0.9	+	.	Target "Motif:NA_COMP964_G1_I1" 1 233
scaffold1068_cov64	RepeatMasker	similarity	587062	587409	10.0	-	.	Target "Motif:NA_COMP3591_G3_I4" 25 358
scaffold1068_cov64	RepeatMasker	similarity	587265	587450	6.5	-	.	Target "Motif:NA_COMP3591_G10_I1" 35 223
scaffold1068_cov64	RepeatMasker	similarity	587419	587665	0.0	-	.	Target "Motif:NA_COMP23621_G1_I1" 1 247
scaffold1068_cov64	RepeatMasker	similarity	587688	587921	3.0	-	.	Target "Motif:OTHERS_COMP3616_G1_I2" 1 234
scaffold1068_cov64	RepeatMasker	similarity	587897	588535	4.8	+	.	Target "Motif:OTHERS_COMP3616_G2_I2" 1 691
scaffold1068_cov64	RepeatMasker	similarity	589515	590087	1.9	+	.	Target "Motif:LTR_COMP3362_G3_I5" 105 685
scaffold1068_cov64	RepeatMasker	similarity	590245	590399	5.2	+	.	Target "Motif:NA_COMP3440_G3_I1" 27 185
scaffold1068_cov64	RepeatMasker	similarity	590617	590686	7.1	+	.	Target "Motif:NA_COMP3440_G3_I1" 180 249
scaffold1068_cov64	RepeatMasker	similarity	591464	591556	2.1	+	.	Target "Motif:NA_COMP3499_G2_I1" 12 104
scaffold1068_cov64	RepeatMasker	similarity	592145	592293	6.1	+	.	Target "Motif:NA_COMP3515_G1_I5" 46 193
scaffold1068_cov64	RepeatMasker	similarity	592777	593002	2.2	+	.	Target "Motif:LOW_COMPLEXITY_COMP46971_G1_I1" 1 226
scaffold1068_cov64	RepeatMasker	similarity	594851	595111	1.1	+	.	Target "Motif:NA_COMP7965_G1_I1" 1 261
scaffold1068_cov64	RepeatMasker	similarity	597586	597774	6.4	-	.	Target "Motif:NA_COMP3395_G3_I1" 94 281
scaffold1068_cov64	RepeatMasker	similarity	597709	597954	4.9	-	.	Target "Motif:NA_COMP3498_G12_I1" 155 400
scaffold1068_cov64	RepeatMasker	similarity	598752	598992	8.0	+	.	Target "Motif:NA_COMP3440_G3_I1" 9 249
scaffold1068_cov64	RepeatMasker	similarity	601454	601579	7.9	-	.	Target "Motif:NA_COMP3507_G2_I1" 273 398
scaffold1068_cov64	RepeatMasker	similarity	601579	601742	7.9	+	.	Target "Motif:NA_COMP3582_G4_I8" 42 206
scaffold1068_cov64	RepeatMasker	similarity	602222	602282	9.8	-	.	Target "Motif:NA_COMP3507_G2_I1" 210 270
scaffold1068_cov64	RepeatMasker	similarity	604100	604236	0.7	+	.	Target "Motif:NA_COMP3510_G5_I5" 1 137
scaffold1068_cov64	RepeatMasker	similarity	609222	609505	0.0	+	.	Target "Motif:NA_COMP31869_G1_I1" 1 284
scaffold1068_cov64	RepeatMasker	similarity	614142	614223	9.0	+	.	Target "Motif:SIMPLE_REPEAT_COMP46712_G1_I1" 134 211
scaffold1068_cov64	RepeatMasker	similarity	614221	614418	0.0	+	.	Target "Motif:SIMPLE_REPEAT_COMP46712_G1_I1" 133 330
scaffold1068_cov64	RepeatMasker	similarity	617881	618058	2.8	+	.	Target "Motif:NA_COMP3598_G3_I1" 311 489
scaffold1068_cov64	RepeatMasker	similarity	628988	629238	0.0	-	.	Target "Motif:NA_COMP48787_G1_I1" 1 251
scaffold1068_cov64	RepeatMasker	similarity	629585	629817	7.0	+	.	Target "Motif:NA_COMP3440_G3_I1" 11 249
scaffold1068_cov64	RepeatMasker	similarity	630384	630455	1.4	+	.	Target "Motif:NA_COMP3440_G3_I1" 180 250
scaffold1068_cov64	RepeatMasker	similarity	632146	632291	9.6	+	.	Target "Motif:NA_COMP3498_G12_I1" 431 576
scaffold1068_cov64	RepeatMasker	similarity	632442	632573	8.3	+	.	Target "Motif:NA_COMP3498_G12_I1" 503 636
scaffold1068_cov64	RepeatMasker	similarity	632560	632859	7.0	-	.	Target "Motif:NA_COMP1974_G1_I2" 1 264
scaffold1068_cov64	RepeatMasker	similarity	633365	633425	8.2	-	.	Target "Motif:NA_COMP3507_G2_I1" 336 396
scaffold1068_cov64	RepeatMasker	similarity	634436	634621	8.6	+	.	Target "Motif:SIMPLE_REPEAT_COMP3588_G5_I5" 116 291
scaffold1068_cov64	RepeatMasker	similarity	634436	634578	6.3	+	.	Target "Motif:NA_COMP3588_G5_I2" 86 228
scaffold1068_cov64	RepeatMasker	similarity	634616	634826	9.5	+	.	Target "Motif:SIMPLE_REPEAT_COMP39634_G1_I1" 19 236
scaffold1068_cov64	RepeatMasker	similarity	637904	638112	7.7	-	.	Target "Motif:NA_COMP3576_G1_I1" 2 216
scaffold1068_cov64	RepeatMasker	similarity	637987	638189	7.4	-	.	Target "Motif:NA_COMP3442_G1_I1" 1 211
scaffold1068_cov64	RepeatMasker	similarity	638078	638622	5.4	-	.	Target "Motif:SIMPLE_REPEAT_COMP3576_G4_I4" 161 684
scaffold1068_cov64	RepeatMasker	similarity	640924	641179	0.0	+	.	Target "Motif:NA_COMP12028_G1_I1" 1 256
scaffold1068_cov64	RepeatMasker	similarity	641145	641435	9.2	+	.	Target "Motif:OTHERS_COMP3538_G12_I1" 30 317
scaffold1068_cov64	RepeatMasker	similarity	646125	646433	2.3	+	.	Target "Motif:NA_COMP46796_G1_I1" 1 309
scaffold1068_cov64	RepeatMasker	similarity	649814	649989	9.7	-	.	Target "Motif:NA_COMP3498_G12_I1" 430 605
scaffold1068_cov64	RepeatMasker	similarity	650179	650321	6.4	+	.	Target "Motif:NA_COMP3557_G11_I1" 77 216
scaffold1068_cov64	RepeatMasker	similarity	653969	654058	8.9	+	.	Target "Motif:NA_COMP18211_G1_I1" 3 92
scaffold1068_cov64	RepeatMasker	similarity	654357	654622	1.1	+	.	Target "Motif:NA_COMP18211_G1_I1" 1 266
scaffold1068_cov64	RepeatMasker	similarity	655094	655268	9.8	+	.	Target "Motif:NA_COMP491_G1_I1" 1 167
scaffold1068_cov64	RepeatMasker	similarity	655547	655797	7.6	-	.	Target "Motif:NA_COMP3507_G2_I1" 146 398
scaffold1068_cov64	RepeatMasker	similarity	657588	657814	0.0	+	.	Target "Motif:NA_COMP32146_G1_I1" 1 227
scaffold1068_cov64	RepeatMasker	similarity	658646	658897	7.1	+	.	Target "Motif:LTR_COMP3518_G5_I3" 2 254
scaffold1068_cov64	RepeatMasker	similarity	658927	659092	7.9	+	.	Target "Motif:NA_COMP3339_G2_I1" 614 780
scaffold1068_cov64	RepeatMasker	similarity	665487	665706	0.0	+	.	Target "Motif:NA_COMP44014_G1_I1" 1 220
scaffold1068_cov64	RepeatMasker	similarity	666887	667013	7.1	-	.	Target "Motif:NA_COMP16599_G1_I1" 547 675
scaffold1068_cov64	RepeatMasker	similarity	667117	667432	8.9	-	.	Target "Motif:NA_COMP16599_G1_I1" 684 988
scaffold1068_cov64	RepeatMasker	similarity	667259	667566	5.4	-	.	Target "Motif:NA_COMP16599_G1_I1" 684 988
scaffold1068_cov64	RepeatMasker	similarity	667324	668321	1.1	-	.	Target "Motif:NA_COMP16599_G1_I1" 1 988
scaffold1068_cov64	RepeatMasker	similarity	668366	668465	6.0	-	.	Target "Motif:NA_COMP3545_G3_I3" 80 179
scaffold1068_cov64	RepeatMasker	similarity	670404	670655	9.2	-	.	Target "Motif:NA_COMP3601_G11_I3" 1 251
scaffold1068_cov64	RepeatMasker	similarity	674795	675128	9.9	-	.	Target "Motif:NA_COMP16599_G1_I1" 670 989
scaffold1068_cov64	RepeatMasker	similarity	680151	680329	6.2	+	.	Target "Motif:NA_COMP3594_G2_I6" 24 226
scaffold1068_cov64	RepeatMasker	similarity	680341	680576	5.7	-	.	Target "Motif:NA_COMP3507_G8_I3" 24 258
scaffold1068_cov64	RepeatMasker	similarity	681995	682089	8.4	+	.	Target "Motif:NA_COMP3452_G6_I1" 56 154
scaffold1068_cov64	RepeatMasker	similarity	686587	686910	1.5	+	.	Target "Motif:NA_COMP49072_G1_I1" 29 352
scaffold1068_cov64	RepeatMasker	similarity	687258	687601	1.2	+	.	Target "Motif:NA_COMP40489_G1_I1" 1 347
scaffold1068_cov64	RepeatMasker	similarity	687455	687670	9.9	+	.	Target "Motif:NA_COMP40489_G1_I1" 130 348
scaffold1068_cov64	RepeatMasker	similarity	689918	690200	9.3	+	.	Target "Motif:NA_COMP48112_G1_I1" 2 281
scaffold1068_cov64	RepeatMasker	similarity	691701	691828	7.8	-	.	Target "Motif:LTR_COMP3549_G16_I1" 240 383
scaffold1068_cov64	RepeatMasker	similarity	691808	691931	8.9	+	.	Target "Motif:NA_COMP3606_G16_I2" 234 362
scaffold1068_cov64	RepeatMasker	similarity	691942	692139	7.6	+	.	Target "Motif:NA_COMP3606_G15_I5" 1 198
scaffold1068_cov64	RepeatMasker	similarity	693895	694229	0.9	-	.	Target "Motif:NA_COMP16050_G1_I1" 1 335
scaffold1068_cov64	RepeatMasker	similarity	695280	695470	9.0	-	.	Target "Motif:OTHERS_COMP3540_G9_I2" 280 446
scaffold1068_cov64	RepeatMasker	similarity	695818	696001	8.8	-	.	Target "Motif:NA_COMP3553_G2_I5" 231 419
scaffold1068_cov64	RepeatMasker	similarity	701837	702047	0.0	+	.	Target "Motif:NA_COMP44346_G1_I1" 18 228
scaffold1068_cov64	RepeatMasker	similarity	703071	703368	0.3	+	.	Target "Motif:NA_COMP42025_G1_I1" 1 298
scaffold1068_cov64	RepeatMasker	similarity	703318	703489	7.1	+	.	Target "Motif:NA_COMP3588_G5_I2" 60 228
scaffold1068_cov64	RepeatMasker	similarity	703603	703888	1.1	+	.	Target "Motif:SIMPLE_REPEAT_COMP39634_G1_I1" 1 286
scaffold1068_cov64	RepeatMasker	similarity	712136	712441	0.0	-	.	Target "Motif:LTR_COMP3518_G5_I3" 200 505
scaffold1068_cov64	RepeatMasker	similarity	713378	713828	6.4	+	.	Target "Motif:SIMPLE_REPEAT_COMP3574_G3_I6" 270 730
scaffold1068_cov64	RepeatMasker	similarity	722097	722313	3.7	-	.	Target "Motif:OTHERS_COMP3569_G9_I3" 240 456
scaffold1068_cov64	RepeatMasker	similarity	722994	723223	6.5	-	.	Target "Motif:NA_COMP3440_G3_I1" 13 249
scaffold1068_cov64	RepeatMasker	similarity	724747	724904	9.5	-	.	Target "Motif:NA_COMP3443_G7_I3" 6 169
scaffold1068_cov64	RepeatMasker	similarity	724863	725218	0.0	+	.	Target "Motif:NA_COMP48112_G1_I1" 1 356
scaffold1068_cov64	RepeatMasker	similarity	729708	729876	8.1	+	.	Target "Motif:NA_COMP3409_G1_I1" 114 274
scaffold1068_cov64	RepeatMasker	similarity	732127	732251	8.0	-	.	Target "Motif:NA_COMP37619_G1_I1" 1 128
scaffold1068_cov64	RepeatMasker	similarity	732300	732527	9.7	-	.	Target "Motif:NA_COMP2437_G1_I1" 1 227
scaffold1068_cov64	RepeatMasker	similarity	732528	732666	7.2	+	.	Target "Motif:OTHERS_COMP3564_G8_I1" 114 252
scaffold1068_cov64	RepeatMasker	similarity	732555	732821	8.2	-	.	Target "Motif:OTHERS_COMP3564_G4_I4" 338 605
scaffold1068_cov64	RepeatMasker	similarity	735249	735424	3.4	+	.	Target "Motif:NA_COMP33976_G1_I2" 84 259
scaffold1068_cov64	RepeatMasker	similarity	735400	735658	0.0	-	.	Target "Motif:NA_COMP33976_G1_I1" 1 259
scaffold1068_cov64	RepeatMasker	similarity	736837	737102	8.3	-	.	Target "Motif:OTHERS_COMP3564_G4_I4" 338 604
scaffold1068_cov64	RepeatMasker	similarity	739644	739853	0.0	+	.	Target "Motif:NA_COMP21953_G1_I1" 1 210
scaffold1068_cov64	RepeatMasker	similarity	740729	741028	0.3	-	.	Target "Motif:NA_COMP42338_G1_I1" 1 300
scaffold1068_cov64	RepeatMasker	similarity	741104	741385	0.0	-	.	Target "Motif:NA_COMP43140_G1_I1" 1 282
scaffold1068_cov64	RepeatMasker	similarity	741595	741809	6.0	-	.	Target "Motif:NA_COMP3559_G1_I2" 281 502
scaffold1068_cov64	RepeatMasker	similarity	741823	741966	9.0	-	.	Target "Motif:OTHERS_COMP8392_G1_I1" 152 298
scaffold1068_cov64	RepeatMasker	similarity	745222	745389	7.2	-	.	Target "Motif:NA_COMP3409_G2_I1" 126 291
scaffold1068_cov64	RepeatMasker	similarity	745528	745709	3.9	-	.	Target "Motif:SIMPLE_REPEAT_COMP35475_G1_I1" 182 369
scaffold1068_cov64	RepeatMasker	similarity	747429	747805	0.3	+	.	Target "Motif:NA_COMP3004_G2_I1" 1 377
scaffold1068_cov64	RepeatMasker	similarity	747721	747929	7.7	+	.	Target "Motif:NA_COMP3004_G3_I2" 174 390
scaffold1068_cov64	RepeatMasker	similarity	748646	748761	3.5	+	.	Target "Motif:NA_COMP3438_G15_I2" 253 365
scaffold1068_cov64	RepeatMasker	similarity	750067	750264	8.6	-	.	Target "Motif:NA_COMP3601_G11_I3" 2 246
scaffold1068_cov64	RepeatMasker	similarity	752541	752682	5.6	+	.	Target "Motif:NA_COMP3576_G1_I1" 74 216
scaffold1068_cov64	RepeatMasker	similarity	752947	753318	0.0	+	.	Target "Motif:NA_COMP47283_G1_I1" 1 372
scaffold1068_cov64	RepeatMasker	similarity	753553	753630	2.6	+	.	Target "Motif:NA_COMP47283_G1_I1" 289 369
scaffold1068_cov64	RepeatMasker	similarity	757833	758088	3.9	-	.	Target "Motif:NA_COMP2437_G1_I1" 103 356
scaffold1068_cov64	RepeatMasker	similarity	758090	758317	3.1	-	.	Target "Motif:NA_COMP2437_G1_I1" 1 227
scaffold1068_cov64	RepeatMasker	similarity	758311	758456	8.3	+	.	Target "Motif:OTHERS_COMP3564_G8_I1" 108 252
scaffold1068_cov64	RepeatMasker	similarity	758918	759175	0.4	-	.	Target "Motif:NA_COMP41141_G1_I1" 1 258
scaffold1068_cov64	RepeatMasker	similarity	759840	759957	3.5	+	.	Target "Motif:NA_COMP3438_G15_I2" 253 367
scaffold1068_cov64	RepeatMasker	similarity	764178	764286	6.4	+	.	Target "Motif:NA_COMP3527_G19_I1" 99 211
scaffold1068_cov64	RepeatMasker	similarity	764252	764485	0.4	+	.	Target "Motif:NA_COMP3527_G19_I1" 1 234
scaffold1068_cov64	RepeatMasker	similarity	764528	764650	3.2	+	.	Target "Motif:NA_COMP3527_G19_I1" 1 123
scaffold1068_cov64	RepeatMasker	similarity	765562	765770	5.3	-	.	Target "Motif:NA_COMP3576_G1_I1" 2 216
scaffold1068_cov64	RepeatMasker	similarity	765645	765847	6.4	-	.	Target "Motif:NA_COMP3442_G1_I1" 1 211
scaffold1068_cov64	RepeatMasker	similarity	765736	766272	5.7	-	.	Target "Motif:SIMPLE_REPEAT_COMP3576_G4_I4" 161 684
scaffold1068_cov64	RepeatMasker	similarity	766269	766449	6.2	-	.	Target "Motif:NA_COMP3538_G14_I1" 297 469
scaffold1068_cov64	RepeatMasker	similarity	767119	767342	8.5	+	.	Target "Motif:NA_COMP3601_G11_I3" 1 255
scaffold1068_cov64	RepeatMasker	similarity	767335	767416	3.8	-	.	Target "Motif:NA_COMP3440_G3_I1" 105 183
scaffold1068_cov64	RepeatMasker	similarity	767852	767965	6.1	-	.	Target "Motif:NA_COMP3440_G3_I1" 9 129
scaffold1068_cov64	RepeatMasker	similarity	771903	772111	8.1	+	.	Target "Motif:NA_COMP3498_G12_I1" 427 636
scaffold1068_cov64	RepeatMasker	similarity	773117	773298	6.6	-	.	Target "Motif:OTHERS_COMP3616_G2_I2" 509 692
scaffold1068_cov64	RepeatMasker	similarity	777092	777350	0.0	+	.	Target "Motif:NA_COMP40536_G1_I1" 1 259
scaffold1068_cov64	RepeatMasker	similarity	777415	777723	0.0	-	.	Target "Motif:NA_COMP31084_G1_I1" 1 309
scaffold1068_cov64	RepeatMasker	similarity	778581	778860	0.0	-	.	Target "Motif:NA_COMP37537_G1_I1" 1 280
scaffold1068_cov64	RepeatMasker	similarity	781471	781603	3.8	+	.	Target "Motif:NA_COMP3606_G15_I5" 1 133
scaffold1068_cov64	RepeatMasker	similarity	782371	782598	8.0	-	.	Target "Motif:NA_COMP3410_G11_I1" 1 224
scaffold1068_cov64	RepeatMasker	similarity	783281	783658	0.0	+	.	Target "Motif:NA_COMP12200_G1_I1" 1 378
scaffold1068_cov64	RepeatMasker	similarity	785049	785328	0.7	-	.	Target "Motif:NA_COMP44389_G1_I1" 1 280
scaffold1068_cov64	RepeatMasker	similarity	786379	786535	9.6	-	.	Target "Motif:NA_COMP3498_G12_I1" 428 584
scaffold1068_cov64	RepeatMasker	similarity	789732	790009	0.0	+	.	Target "Motif:NA_COMP50273_G1_I1" 1 278
scaffold1068_cov64	RepeatMasker	similarity	791319	791416	4.2	-	.	Target "Motif:NA_COMP3498_G12_I1" 63 158
scaffold1068_cov64	RepeatMasker	similarity	794178	794243	7.6	+	.	Target "Motif:NA_COMP3604_G3_I2" 1 66
scaffold1068_cov64	RepeatMasker	similarity	794229	794890	4.7	-	.	Target "Motif:OTHERS_COMP3616_G2_I2" 1 700
scaffold1068_cov64	RepeatMasker	similarity	794866	795099	2.6	+	.	Target "Motif:OTHERS_COMP3616_G1_I2" 1 234
scaffold1068_cov64	RepeatMasker	similarity	795102	795239	9.4	+	.	Target "Motif:NA_COMP3604_G3_I2" 63 200
scaffold1068_cov64	RepeatMasker	similarity	797375	797555	9.6	-	.	Target "Motif:OTHERS_COMP3588_G7_I1" 332 515
scaffold1068_cov64	RepeatMasker	similarity	807648	807730	3.8	+	.	Target "Motif:NA_COMP3545_G6_I1" 9 98
scaffold1068_cov64	RepeatMasker	similarity	807656	807721	6.1	-	.	Target "Motif:NA_COMP3543_G3_I1" 182 253
scaffold1068_cov64	RepeatMasker	similarity	807896	808068	9.2	+	.	Target "Motif:NA_COMP3522_G6_I5" 1 173
scaffold1068_cov64	RepeatMasker	similarity	808294	808499	9.2	-	.	Target "Motif:NA_COMP3472_G3_I1" 135 340
scaffold1068_cov64	RepeatMasker	similarity	809714	809902	8.5	-	.	Target "Motif:NA_COMP3485_G1_I3" 153 366
scaffold1068_cov64	RepeatMasker	similarity	811671	812369	0.0	-	.	Target "Motif:NA_COMP11388_G1_I1" 1 699
scaffold1068_cov64	RepeatMasker	similarity	812936	813412	0.0	+	.	Target "Motif:NA_COMP23193_G1_I1" 1 477
scaffold1068_cov64	RepeatMasker	similarity	817688	818250	0.0	-	.	Target "Motif:NA_COMP18410_G1_I1" 1 563
scaffold1068_cov64	RepeatMasker	similarity	818253	818538	0.0	+	.	Target "Motif:NA_COMP37751_G1_I1" 1 286
scaffold1068_cov64	RepeatMasker	similarity	819819	820094	1.1	+	.	Target "Motif:NA_COMP39125_G1_I1" 1 276
scaffold1068_cov64	RepeatMasker	similarity	820101	820346	0.4	-	.	Target "Motif:NA_COMP49370_G1_I1" 1 246
scaffold1068_cov64	RepeatMasker	similarity	832471	832880	0.0	-	.	Target "Motif:NA_COMP26362_G1_I1" 1 410
scaffold1068_cov64	RepeatMasker	similarity	838328	838614	0.0	+	.	Target "Motif:NA_COMP18165_G1_I1" 1 287
scaffold1068_cov64	RepeatMasker	similarity	840553	840796	3.7	+	.	Target "Motif:OTHERS_COMP3608_G4_I1" 113 411
scaffold1068_cov64	RepeatMasker	similarity	841261	842129	0.0	-	.	Target "Motif:SIMPLE_REPEAT_COMP4903_G1_I1" 1 869
scaffold1068_cov64	RepeatMasker	similarity	843966	844496	0.4	-	.	Target "Motif:NA_COMP29229_G1_I1" 1 531
scaffold1068_cov64	RepeatMasker	similarity	844864	845282	0.0	+	.	Target "Motif:NA_COMP18628_G1_I1" 1 419
scaffold1068_cov64	RepeatMasker	similarity	846529	846948	0.7	-	.	Target "Motif:NA_COMP42024_G1_I1" 1 420
scaffold1068_cov64	RepeatMasker	similarity	860571	860872	0.0	+	.	Target "Motif:NA_COMP10938_G1_I1" 1 302
scaffold1068_cov64	RepeatMasker	similarity	864858	864938	7.4	+	.	Target "Motif:NA_COMP3577_G3_I4" 129 228
scaffold1068_cov64	RepeatMasker	similarity	865773	865989	9.7	-	.	Target "Motif:NA_COMP3522_G9_I2" 1 219
scaffold1068_cov64	RepeatMasker	similarity	867477	867746	0.4	+	.	Target "Motif:NA_COMP35546_G1_I1" 1 270
scaffold1068_cov64	RepeatMasker	similarity	872747	872999	0.0	-	.	Target "Motif:NA_COMP30895_G1_I1" 1 253
scaffold1068_cov64	RepeatMasker	similarity	873842	874031	9.2	+	.	Target "Motif:SIMPLE_REPEAT_COMP3532_G2_I3" 175 373
scaffold1068_cov64	RepeatMasker	similarity	882092	882388	1.7	+	.	Target "Motif:SIMPLE_REPEAT_COMP3550_G4_I4" 1 297
scaffold1068_cov64	RepeatMasker	similarity	884472	884698	0.0	-	.	Target "Motif:NA_COMP36465_G1_I1" 1 227
scaffold1068_cov64	RepeatMasker	similarity	886931	887094	7.3	-	.	Target "Motif:OTHERS_COMP3540_G9_I4" 39 244
scaffold1068_cov64	RepeatMasker	similarity	887414	887616	7.4	+	.	Target "Motif:NA_COMP3486_G7_I2" 2 215
scaffold1068_cov64	RepeatMasker	similarity	887713	887877	0.6	+	.	Target "Motif:NA_COMP3529_G8_I1" 1 165
scaffold1068_cov64	RepeatMasker	similarity	888754	888974	7.8	+	.	Target "Motif:NA_COMP3594_G2_I6" 1 226
scaffold1068_cov64	RepeatMasker	similarity	890224	890359	7.3	+	.	Target "Motif:NA_COMP3458_G4_I4" 3 138
scaffold1068_cov64	RepeatMasker	similarity	891737	892009	0.0	-	.	Target "Motif:NA_COMP1138_G1_I1" 1 273
scaffold1068_cov64	RepeatMasker	similarity	893067	893243	7.9	+	.	Target "Motif:NA_COMP636_G1_I1" 30 217
scaffold1068_cov64	RepeatMasker	similarity	898242	898294	5.7	-	.	Target "Motif:NA_COMP3431_G2_I12" 199 251
scaffold1068_cov64	RepeatMasker	similarity	898293	898594	9.7	-	.	Target "Motif:NA_COMP3431_G2_I4" 15 278
scaffold1068_cov64	RepeatMasker	similarity	898358	898594	3.0	-	.	Target "Motif:LTR_COMP3431_G2_I8" 15 250
scaffold1068_cov64	RepeatMasker	similarity	900718	900894	0.0	-	.	Target "Motif:NA_COMP1860_G1_I1" 1 177
scaffold1068_cov64	RepeatMasker	similarity	902281	902506	0.0	+	.	Target "Motif:NA_COMP46254_G1_I1" 1 226
scaffold1068_cov64	RepeatMasker	similarity	902574	902792	6.7	-	.	Target "Motif:NA_COMP3498_G12_I1" 428 636
scaffold1068_cov64	RepeatMasker	similarity	905581	905858	1.1	-	.	Target "Motif:NA_COMP13203_G1_I1" 240 517
scaffold1068_cov64	RepeatMasker	similarity	906030	906126	6.2	-	.	Target "Motif:NA_COMP3486_G7_I2" 25 125
scaffold1068_cov64	RepeatMasker	similarity	907212	907617	0.0	-	.	Target "Motif:NA_COMP12034_G1_I1" 1 406
scaffold1068_cov64	RepeatMasker	similarity	908053	908612	0.0	+	.	Target "Motif:NA_COMP32603_G1_I1" 1 560
scaffold1068_cov64	RepeatMasker	similarity	915195	915720	0.8	+	.	Target "Motif:NA_COMP16269_G1_I1" 1 526
scaffold1068_cov64	RepeatMasker	similarity	927380	927645	0.8	-	.	Target "Motif:NA_COMP42880_G1_I1" 1 266
scaffold1068_cov64	RepeatMasker	similarity	928801	929012	1.4	-	.	Target "Motif:NA_COMP10848_G1_I1" 1 212
scaffold1068_cov64	RepeatMasker	similarity	930096	930303	7.7	-	.	Target "Motif:NA_COMP3583_G2_I2" 35 262
scaffold1068_cov64	RepeatMasker	similarity	930752	930933	4.4	+	.	Target "Motif:NA_COMP3477_G7_I1" 162 384
scaffold1068_cov64	RepeatMasker	similarity	931335	931490	9.6	+	.	Target "Motif:NA_COMP3553_G2_I5" 232 419
scaffold1068_cov64	RepeatMasker	similarity	932635	932842	8.7	+	.	Target "Motif:NA_COMP3563_G9_I1" 42 247
scaffold1068_cov64	RepeatMasker	similarity	933109	933285	9.6	+	.	Target "Motif:NA_COMP3498_G12_I1" 460 636
scaffold1068_cov64	RepeatMasker	similarity	933353	933615	5.5	-	.	Target "Motif:NA_COMP46254_G1_I1" 1 226
scaffold1068_cov64	RepeatMasker	similarity	933754	933860	7.5	+	.	Target "Motif:NA_COMP3593_G5_I3" 123 230
scaffold1068_cov64	RepeatMasker	similarity	933848	933936	5.6	+	.	Target "Motif:NA_COMP2902_G1_I1" 214 303
scaffold1068_cov64	RepeatMasker	similarity	935905	935957	7.5	+	.	Target "Motif:NA_COMP3583_G2_I1" 6 58
scaffold1068_cov64	RepeatMasker	similarity	937866	938272	4.9	+	.	Target "Motif:NA_COMP3549_G5_I1" 12 422
scaffold1068_cov64	RepeatMasker	similarity	949059	949507	0.0	+	.	Target "Motif:NA_COMP14467_G1_I1" 1 449
scaffold1068_cov64	RepeatMasker	similarity	949518	949808	0.0	-	.	Target "Motif:NA_COMP9870_G1_I1" 1 291
scaffold1068_cov64	RepeatMasker	similarity	953177	953393	6.5	-	.	Target "Motif:LTR_COMP3549_G16_I1" 170 383
scaffold1068_cov64	RepeatMasker	similarity	983977	984877	0.0	-	.	Target "Motif:NA_COMP11610_G1_I1" 1 901
scaffold1068_cov64	RepeatMasker	similarity	989262	989618	0.3	+	.	Target "Motif:NA_COMP43557_G1_I1" 1 357
scaffold1068_cov64	RepeatMasker	similarity	993419	993731	0.0	-	.	Target "Motif:LOW_COMPLEXITY_COMP47349_G1_I1" 1 313
scaffold1068_cov64	RepeatMasker	similarity	994244	994528	8.8	+	.	Target "Motif:NA_COMP3310_G1_I3" 102 386
scaffold1068_cov64	RepeatMasker	similarity	996755	997041	0.0	-	.	Target "Motif:NA_COMP46172_G1_I1" 1 287
scaffold1068_cov64	RepeatMasker	similarity	998546	998818	1.1	+	.	Target "Motif:SIMPLE_REPEAT_COMP49637_G1_I1" 1 273
scaffold1068_cov64	RepeatMasker	similarity	1003208	1003421	0.0	+	.	Target "Motif:NA_COMP28542_G1_I1" 1 214
scaffold1068_cov64	RepeatMasker	similarity	1004604	1004892	0.0	-	.	Target "Motif:NA_COMP43814_G1_I1" 1 289
scaffold1068_cov64	RepeatMasker	similarity	1005661	1005893	5.2	+	.	Target "Motif:NA_COMP3583_G2_I4" 186 418
scaffold1068_cov64	RepeatMasker	similarity	1005872	1006116	0.0	+	.	Target "Motif:NA_COMP35559_G1_I1" 1 245
scaffold1068_cov64	RepeatMasker	similarity	1007170	1007562	0.5	+	.	Target "Motif:NA_COMP31809_G1_I1" 1 393
scaffold1068_cov64	RepeatMasker	similarity	1010925	1011185	1.5	-	.	Target "Motif:NA_COMP1222_G1_I1" 350 609
scaffold1068_cov64	RepeatMasker	similarity	1011181	1011687	1.6	-	.	Target "Motif:NA_COMP1222_G1_I1" 1 507
scaffold1068_cov64	RepeatMasker	similarity	1012019	1012077	8.5	+	.	Target "Motif:NA_COMP3413_G5_I2" 176 240
scaffold1068_cov64	RepeatMasker	similarity	1012050	1012404	0.6	+	.	Target "Motif:NA_COMP1313_G1_I1" 1 353
scaffold1068_cov64	RepeatMasker	similarity	1014011	1014271	1.1	+	.	Target "Motif:NA_COMP35519_G1_I1" 1 261
scaffold1068_cov64	RepeatMasker	similarity	1019043	1019539	0.6	-	.	Target "Motif:NA_COMP5503_G1_I1" 1 497
scaffold1068_cov64	RepeatMasker	similarity	1022444	1022897	3.5	-	.	Target "Motif:NA_COMP31120_G1_I1" 1 454
scaffold1068_cov64	RepeatMasker	similarity	1025847	1026136	0.0	+	.	Target "Motif:NA_COMP40118_G1_I1" 1 290
scaffold1068_cov64	RepeatMasker	similarity	1035679	1035986	0.0	-	.	Target "Motif:OTHERS_COMP48507_G1_I1" 1 308
scaffold1068_cov64	RepeatMasker	similarity	1044309	1044587	0.4	+	.	Target "Motif:NA_COMP10199_G1_I1" 1 279
scaffold1068_cov64	RepeatMasker	similarity	1047925	1047998	9.6	+	.	Target "Motif:NA_COMP3573_G1_I5" 289 361
scaffold1068_cov64	RepeatMasker	similarity	1073339	1073720	0.0	+	.	Target "Motif:NA_COMP47451_G1_I1" 1 382
scaffold1068_cov64	RepeatMasker	similarity	1077199	1077362	2.4	+	.	Target "Motif:NA_COMP24278_G1_I1" 228 391
scaffold1068_cov64	RepeatMasker	similarity	1082311	1082756	0.7	+	.	Target "Motif:NA_COMP26699_G1_I1" 2 447
scaffold1068_cov64	RepeatMasker	similarity	1082854	1083139	0.0	+	.	Target "Motif:NA_COMP26460_G1_I1" 1 286
scaffold1068_cov64	RepeatMasker	similarity	1083188	1083605	0.5	-	.	Target "Motif:NA_COMP9403_G1_I1" 1 418
scaffold1068_cov64	RepeatMasker	similarity	1090973	1091376	0.2	-	.	Target "Motif:NA_COMP9339_G1_I1" 1 404
scaffold1068_cov64	RepeatMasker	similarity	1097824	1098011	0.5	+	.	Target "Motif:NA_COMP51253_G1_I1" 14 201
scaffold1068_cov64	RepeatMasker	similarity	1105752	1106011	0.0	+	.	Target "Motif:NA_COMP28605_G1_I1" 18 277
scaffold1068_cov64	RepeatMasker	similarity	1106152	1106238	8.1	+	.	Target "Motif:NA_COMP42091_G1_I1" 11 97
scaffold1068_cov64	RepeatMasker	similarity	1109944	1110512	0.5	+	.	Target "Motif:SIMPLE_REPEAT_COMP1737_G1_I1" 19 584
scaffold1068_cov64	RepeatMasker	similarity	1113661	1114071	0.0	+	.	Target "Motif:NA_COMP30167_G1_I1" 1 413
scaffold1068_cov64	RepeatMasker	similarity	1117438	1117887	0.4	+	.	Target "Motif:NA_COMP14702_G1_I1" 157 606
scaffold1068_cov64	RepeatMasker	similarity	1118376	1118593	0.9	-	.	Target "Motif:NA_COMP40871_G1_I1" 1 218
scaffold1068_cov64	RepeatMasker	similarity	1124924	1125573	0.0	+	.	Target "Motif:SIMPLE_REPEAT_COMP17500_G1_I1" 1 650
scaffold1068_cov64	RepeatMasker	similarity	1125944	1126663	0.0	+	.	Target "Motif:NA_COMP9382_G1_I1" 1 720
scaffold1068_cov64	RepeatMasker	similarity	1156392	1156659	0.0	-	.	Target "Motif:NA_COMP31270_G1_I1" 1 268
scaffold1068_cov64	RepeatMasker	similarity	1156996	1157519	0.2	+	.	Target "Motif:NA_COMP7959_G1_I1" 1 524
scaffold1068_cov64	RepeatMasker	similarity	1163785	1164229	0.7	+	.	Target "Motif:NA_COMP14668_G1_I1" 1 445
scaffold1068_cov64	RepeatMasker	similarity	1164379	1164680	0.0	-	.	Target "Motif:NA_COMP13512_G1_I1" 1 302
scaffold1068_cov64	RepeatMasker	similarity	1169134	1169468	0.0	-	.	Target "Motif:NA_COMP22414_G1_I1" 18 352
scaffold1068_cov64	RepeatMasker	similarity	1175055	1175283	7.4	-	.	Target "Motif:OTHERS_COMP50202_G1_I1" 27 266
scaffold1068_cov64	RepeatMasker	similarity	1183565	1183848	0.0	+	.	Target "Motif:NA_COMP19398_G1_I1" 1 284
scaffold1068_cov64	RepeatMasker	similarity	1184666	1184989	0.0	+	.	Target "Motif:NA_COMP18266_G1_I1" 1 324
scaffold1068_cov64	RepeatMasker	similarity	1186193	1186866	0.0	+	.	Target "Motif:NA_COMP4462_G1_I1" 1 674
scaffold1068_cov64	RepeatMasker	similarity	1192133	1192456	0.0	+	.	Target "Motif:OTHERS_COMP34050_G1_I1" 1 324
scaffold1068_cov64	RepeatMasker	similarity	1200310	1200954	0.2	-	.	Target "Motif:NA_COMP18724_G1_I1" 1 645
scaffold1068_cov64	RepeatMasker	similarity	1206987	1207276	0.0	+	.	Target "Motif:NA_COMP47112_G1_I1" 1 290
scaffold1068_cov64	RepeatMasker	similarity	1214358	1215097	0.0	-	.	Target "Motif:SIMPLE_REPEAT_COMP36705_G1_I1" 1 740
scaffold1068_cov64	RepeatMasker	similarity	1217290	1217724	0.2	-	.	Target "Motif:NA_COMP16118_G1_I1" 1 435
scaffold1068_cov64	RepeatMasker	similarity	1221883	1222178	0.3	-	.	Target "Motif:NA_COMP27123_G1_I1" 1 297
scaffold1068_cov64	RepeatMasker	similarity	1222279	1222545	0.0	+	.	Target "Motif:NA_COMP26487_G1_I1" 1 267
scaffold1068_cov64	RepeatMasker	similarity	1222593	1222735	9.9	-	.	Target "Motif:NA_COMP2947_G1_I4" 75 229
scaffold1068_cov64	RepeatMasker	similarity	1232491	1232769	0.0	-	.	Target "Motif:NA_COMP33983_G1_I1" 1 279
scaffold1068_cov64	RepeatMasker	similarity	1236235	1236466	0.4	-	.	Target "Motif:NA_COMP26198_G1_I1" 1 232
scaffold1068_cov64	RepeatMasker	similarity	1241112	1241312	0.0	+	.	Target "Motif:NA_COMP31039_G1_I1" 1 201
scaffold1068_cov64	RepeatMasker	similarity	1242140	1242273	8.8	-	.	Target "Motif:NA_COMP3145_G2_I1" 249 379
scaffold1068_cov64	RepeatMasker	similarity	1242626	1242837	4.2	+	.	Target "Motif:NA_COMP3559_G1_I3" 32 255
scaffold1068_cov64	RepeatMasker	similarity	1245060	1245300	0.0	-	.	Target "Motif:NA_COMP32980_G1_I1" 17 257
scaffold1068_cov64	RepeatMasker	similarity	1247937	1248029	7.5	-	.	Target "Motif:NA_COMP3606_G15_I5" 100 192
scaffold1068_cov64	RepeatMasker	similarity	1248233	1248340	9.5	-	.	Target "Motif:NA_COMP3606_G15_I5" 1 113
scaffold1068_cov64	RepeatMasker	similarity	1250351	1250412	8.1	+	.	Target "Motif:NA_COMP3545_G3_I3" 57 120
scaffold1068_cov64	RepeatMasker	similarity	1250404	1250619	9.7	+	.	Target "Motif:OTHERS_COMP3255_G1_I2" 179 406
scaffold1068_cov64	RepeatMasker	similarity	1250519	1250763	0.8	-	.	Target "Motif:NA_COMP3604_G11_I8" 1 245
scaffold1068_cov64	RepeatMasker	similarity	1253919	1254183	0.0	+	.	Target "Motif:NA_COMP20386_G1_I1" 1 265
scaffold1068_cov64	RepeatMasker	similarity	1258411	1258709	3.7	+	.	Target "Motif:OTHERS_COMP3101_G2_I1" 1 299
scaffold1068_cov64	RepeatMasker	similarity	1271771	1272131	2.8	-	.	Target "Motif:NA_COMP8763_G1_I1" 81 441
scaffold1068_cov64	RepeatMasker	similarity	1272189	1272405	8.1	-	.	Target "Motif:NA_COMP3510_G8_I2" 17 226
scaffold1068_cov64	RepeatMasker	similarity	1279108	1279220	8.0	+	.	Target "Motif:NA_COMP3545_G3_I3" 57 172
scaffold1068_cov64	RepeatMasker	similarity	1280802	1281135	0.0	-	.	Target "Motif:SIMPLE_REPEAT_COMP18441_G1_I1" 1 334
scaffold1068_cov64	RepeatMasker	similarity	1281476	1281972	0.2	+	.	Target "Motif:NA_COMP21578_G1_I1" 1 497
scaffold1068_cov64	RepeatMasker	similarity	1285671	1286301	0.2	+	.	Target "Motif:NA_COMP28409_G1_I1" 1 631
scaffold1068_cov64	RepeatMasker	similarity	1286419	1286486	2.9	+	.	Target "Motif:NA_COMP50221_G1_I1" 188 255
scaffold1068_cov64	RepeatMasker	similarity	1286462	1286717	0.0	-	.	Target "Motif:NA_COMP50221_G1_I2" 1 256
scaffold1068_cov64	RepeatMasker	similarity	1286881	1287285	0.0	-	.	Target "Motif:NA_COMP42088_G1_I1" 1 405
scaffold1068_cov64	RepeatMasker	similarity	1298173	1298465	0.0	+	.	Target "Motif:NA_COMP37311_G1_I1" 1 293
scaffold1068_cov64	RepeatMasker	similarity	1302733	1303029	0.0	+	.	Target "Motif:NA_COMP20065_G1_I1" 1 297
scaffold1068_cov64	RepeatMasker	similarity	1305359	1305477	3.8	-	.	Target "Motif:NA_COMP34062_G1_I1" 6 112
scaffold1068_cov64	RepeatMasker	similarity	1308280	1308370	9.9	-	.	Target "Motif:NA_COMP3553_G2_I5" 329 419
scaffold1068_cov64	RepeatMasker	similarity	1308590	1308812	8.1	+	.	Target "Motif:SIMPLE_REPEAT_COMP3588_G5_I5" 98 307
scaffold1068_cov64	RepeatMasker	similarity	1309237	1309362	9.9	+	.	Target "Motif:NA_COMP3522_G7_I2" 87 212
scaffold1068_cov64	RepeatMasker	similarity	1309623	1309809	9.1	+	.	Target "Motif:NA_COMP3522_G9_I2" 1 186
scaffold1068_cov64	RepeatMasker	similarity	1317867	1318078	0.5	+	.	Target "Motif:NA_COMP22473_G1_I1" 1 212
scaffold1068_cov64	RepeatMasker	similarity	1318387	1318604	0.0	-	.	Target "Motif:NA_COMP3552_G5_I1" 1 218
scaffold1068_cov64	RepeatMasker	similarity	1320127	1320448	3.1	-	.	Target "Motif:NA_COMP25626_G1_I1" 13 335
scaffold1068_cov64	RepeatMasker	similarity	1321072	1321276	6.4	-	.	Target "Motif:NA_COMP3563_G9_I1" 42 247
scaffold1068_cov64	RepeatMasker	similarity	1321266	1321446	6.6	+	.	Target "Motif:NA_COMP3599_G9_I8" 22 202
scaffold1068_cov64	RepeatMasker	similarity	1321289	1321516	7.2	-	.	Target "Motif:NA_COMP3410_G11_I1" 1 224
scaffold1068_cov64	RepeatMasker	similarity	1321527	1321584	6.9	+	.	Target "Motif:NA_COMP3515_G1_I3" 94 151
scaffold1068_cov64	RepeatMasker	similarity	1321930	1322005	6.6	-	.	Target "Motif:NA_COMP3410_G15_I1" 1 76
scaffold1068_cov64	RepeatMasker	similarity	1322000	1322237	6.5	+	.	Target "Motif:NA_COMP3507_G8_I3" 25 258
scaffold1068_cov64	RepeatMasker	similarity	1322964	1323029	9.1	+	.	Target "Motif:NA_COMP3537_G2_I2" 216 288
scaffold1068_cov64	RepeatMasker	similarity	1324475	1324554	3.9	-	.	Target "Motif:NA_COMP3468_G5_I2" 92 170
scaffold1068_cov64	RepeatMasker	similarity	1324477	1324564	8.0	-	.	Target "Motif:NA_COMP3583_G2_I2" 171 262
scaffold1068_cov64	RepeatMasker	similarity	1324805	1325007	9.4	-	.	Target "Motif:NA_COMP3594_G2_I6" 1 206
scaffold1068_cov64	RepeatMasker	similarity	1325897	1326143	4.5	-	.	Target "Motif:NA_COMP3440_G3_I1" 5 249
scaffold1068_cov64	RepeatMasker	similarity	1328985	1329178	9.3	+	.	Target "Motif:NA_COMP3606_G15_I5" 1 194
scaffold1068_cov64	RepeatMasker	similarity	1331189	1331389	5.0	-	.	Target "Motif:NA_COMP3498_G12_I1" 432 632
scaffold1068_cov64	RepeatMasker	similarity	1332335	1332612	0.4	+	.	Target "Motif:NA_COMP24435_G1_I1" 1 278
scaffold1068_cov64	RepeatMasker	similarity	1333901	1334316	0.0	+	.	Target "Motif:NA_COMP24295_G1_I1" 1 416
scaffold1068_cov64	RepeatMasker	similarity	1334817	1334926	9.1	+	.	Target "Motif:NA_COMP3563_G9_I1" 40 149
scaffold1068_cov64	RepeatMasker	similarity	1335040	1335231	7.3	+	.	Target "Motif:NA_COMP3606_G15_I5" 1 192
scaffold1068_cov64	RepeatMasker	similarity	1336258	1336430	6.4	+	.	Target "Motif:OTHERS_COMP3608_G4_I1" 113 285
scaffold1068_cov64	RepeatMasker	similarity	1336995	1337101	6.5	-	.	Target "Motif:NA_COMP15835_G1_I1" 100 206
scaffold1068_cov64	RepeatMasker	similarity	1339442	1339678	0.4	+	.	Target "Motif:NA_COMP3557_G10_I1" 1 235
scaffold1068_cov64	RepeatMasker	similarity	1339679	1339763	4.7	+	.	Target "Motif:NA_COMP3557_G7_I3" 38 125
scaffold1068_cov64	RepeatMasker	similarity	1339773	1339941	5.3	+	.	Target "Motif:NA_COMP3557_G7_I3" 38 207
scaffold1068_cov64	RepeatMasker	similarity	1340154	1340330	6.8	+	.	Target "Motif:NA_COMP3532_G6_I1" 17 195
scaffold1068_cov64	RepeatMasker	similarity	1340808	1340863	5.5	-	.	Target "Motif:NA_COMP3440_G3_I1" 199 253
scaffold1068_cov64	RepeatMasker	similarity	1340860	1340922	7.9	+	.	Target "Motif:NA_COMP3443_G11_I1" 75 137
scaffold1068_cov64	RepeatMasker	similarity	1340917	1341176	2.4	-	.	Target "Motif:NA_COMP49072_G1_I1" 1 255
scaffold1068_cov64	RepeatMasker	similarity	1341157	1341308	4.0	-	.	Target "Motif:NA_COMP3559_G1_I3" 104 255
scaffold1068_cov64	RepeatMasker	similarity	1342223	1342411	8.5	+	.	Target "Motif:NA_COMP3606_G15_I5" 1 192
scaffold1068_cov64	RepeatMasker	similarity	1345956	1346241	0.0	+	.	Target "Motif:NA_COMP12181_G1_I1" 1 286
scaffold1068_cov64	RepeatMasker	similarity	1347089	1347171	3.7	-	.	Target "Motif:NA_COMP24295_G1_I1" 336 416
scaffold1068_cov64	RepeatMasker	similarity	1350363	1350530	9.0	+	.	Target "Motif:NA_COMP3472_G18_I1" 101 292
scaffold1068_cov64	RepeatMasker	similarity	1350401	1350567	9.4	+	.	Target "Motif:NA_COMP3472_G3_I3" 132 313
scaffold1068_cov64	RepeatMasker	similarity	1353657	1353766	7.7	-	.	Target "Motif:NA_COMP3591_G3_I1" 25 128
scaffold1068_cov64	RepeatMasker	similarity	1353951	1354111	9.9	+	.	Target "Motif:NA_COMP3515_G1_I3" 177 339
scaffold1068_cov64	RepeatMasker	similarity	1354165	1354378	7.4	+	.	Target "Motif:SIMPLE_REPEAT_COMP3588_G5_I5" 98 312
scaffold1068_cov64	RepeatMasker	similarity	1356697	1356908	6.1	+	.	Target "Motif:NA_COMP1265_G1_I1" 9 220
scaffold1068_cov64	RepeatMasker	similarity	1360954	1361224	0.4	+	.	Target "Motif:NA_COMP36433_G1_I1" 1 271
scaffold1068_cov64	RepeatMasker	similarity	1361986	1362263	0.0	-	.	Target "Motif:NA_COMP44882_G1_I1" 1 278
scaffold1068_cov64	RepeatMasker	similarity	1364063	1364275	0.0	-	.	Target "Motif:NA_COMP26640_G1_I1" 1 213
scaffold1068_cov64	RepeatMasker	similarity	1368482	1368605	7.3	-	.	Target "Motif:NA_COMP36622_G1_I1" 290 413
scaffold1068_cov64	RepeatMasker	similarity	1368914	1369043	9.2	-	.	Target "Motif:NA_COMP36622_G1_I1" 284 413
scaffold1068_cov64	RepeatMasker	similarity	1369028	1369440	0.0	-	.	Target "Motif:NA_COMP36622_G1_I1" 1 413
scaffold1068_cov64	RepeatMasker	similarity	1374434	1374757	0.0	-	.	Target "Motif:NA_COMP25445_G1_I1" 1 324
scaffold1068_cov64	RepeatMasker	similarity	1380488	1380579	8.7	+	.	Target "Motif:NA_COMP934_G1_I1" 2 93
scaffold1068_cov64	RepeatMasker	similarity	1380838	1381038	9.7	+	.	Target "Motif:NA_COMP3507_G2_I1" 140 363
scaffold1068_cov64	RepeatMasker	similarity	1381036	1381207	3.0	-	.	Target "Motif:NA_COMP3507_G8_I3" 87 254
scaffold1068_cov64	RepeatMasker	similarity	1383626	1383870	7.8	+	.	Target "Motif:NA_COMP3507_G2_I1" 145 396
scaffold1068_cov64	RepeatMasker	similarity	1384744	1385041	2.4	+	.	Target "Motif:NA_COMP934_G1_I1" 1 298
scaffold1068_cov64	RepeatMasker	similarity	1389117	1389450	4.8	-	.	Target "Motif:NA_COMP25457_G1_I1" 36 369
scaffold1068_cov64	RepeatMasker	similarity	1389266	1389624	3.6	-	.	Target "Motif:NA_COMP25457_G1_I1" 23 381
scaffold1068_cov64	RepeatMasker	similarity	1390197	1390483	0.7	+	.	Target "Motif:NA_COMP31079_G1_I1" 1 287
scaffold1068_cov64	RepeatMasker	similarity	1391995	1392279	0.7	+	.	Target "Motif:NA_COMP35417_G1_I1" 1 285
scaffold1068_cov64	RepeatMasker	similarity	1394487	1394690	0.0	-	.	Target "Motif:SIMPLE_REPEAT_COMP44005_G1_I1" 1 204
scaffold1068_cov64	RepeatMasker	similarity	1401615	1401865	8.8	-	.	Target "Motif:NA_COMP3313_G3_I3" 1 251
scaffold1068_cov64	RepeatMasker	similarity	1401862	1402059	6.6	+	.	Target "Motif:LTR_COMP3549_G16_I1" 168 370
scaffold1068_cov64	RepeatMasker	similarity	1403247	1403517	0.0	-	.	Target "Motif:NA_COMP12988_G1_I1" 1 271
scaffold1068_cov64	RepeatMasker	similarity	1408283	1408536	4.7	+	.	Target "Motif:NA_COMP3402_G5_I2" 90 346
scaffold1068_cov64	RepeatMasker	similarity	1408484	1408757	0.7	+	.	Target "Motif:NA_COMP885_G1_I1" 1 274
scaffold1068_cov64	RepeatMasker	similarity	1412813	1413017	0.5	-	.	Target "Motif:OTHERS_COMP4138_G1_I1" 3 207
scaffold1068_cov64	RepeatMasker	similarity	1414327	1414612	0.0	+	.	Target "Motif:SIMPLE_REPEAT_COMP8782_G1_I1" 211 496
scaffold1068_cov64	RepeatMasker	similarity	1416753	1417258	0.0	-	.	Target "Motif:NA_COMP44907_G1_I1" 1 506
scaffold1068_cov64	RepeatMasker	similarity	1420619	1421047	0.0	-	.	Target "Motif:NA_COMP24780_G1_I1" 1 429
scaffold1068_cov64	RepeatMasker	similarity	1422040	1422335	0.0	-	.	Target "Motif:NA_COMP12621_G1_I1" 1 296
scaffold1068_cov64	RepeatMasker	similarity	1425636	1426088	0.4	+	.	Target "Motif:NA_COMP50149_G1_I1" 1 453
scaffold1068_cov64	RepeatMasker	similarity	1428213	1428436	8.1	+	.	Target "Motif:NA_COMP3595_G5_I3" 209 451
scaffold1068_cov64	RepeatMasker	similarity	1430216	1430503	9.4	-	.	Target "Motif:SIMPLE_REPEAT_COMP3588_G5_I5" 96 357
scaffold1068_cov64	RepeatMasker	similarity	1434873	1435166	0.0	-	.	Target "Motif:NA_COMP10814_G1_I1" 1 294
scaffold1068_cov64	RepeatMasker	similarity	1438998	1439152	6.5	+	.	Target "Motif:NA_COMP2492_G1_I1" 1 158
scaffold1068_cov64	RepeatMasker	similarity	1439240	1439579	0.0	+	.	Target "Motif:NA_COMP712_G1_I1" 1 340
scaffold1068_cov64	RepeatMasker	similarity	1440568	1440834	5.2	+	.	Target "Motif:NA_COMP2032_G1_I1" 2 268
scaffold1068_cov64	RepeatMasker	similarity	1440704	1440855	9.9	-	.	Target "Motif:NA_COMP3468_G7_I2" 57 210
scaffold1068_cov64	RepeatMasker	similarity	1446911	1447380	0.0	+	.	Target "Motif:NA_COMP3540_G17_I1" 1 470
scaffold1068_cov64	RepeatMasker	similarity	1448848	1449071	0.0	+	.	Target "Motif:LOW_COMPLEXITY_COMP41228_G1_I1" 1 224
scaffold1068_cov64	RepeatMasker	similarity	1450243	1450465	4.0	+	.	Target "Motif:NA_COMP3559_G1_I2" 280 502
scaffold1068_cov64	RepeatMasker	similarity	1450706	1450768	7.9	-	.	Target "Motif:LOW_COMPLEXITY_COMP3545_G7_I1" 126 195
scaffold1068_cov64	RepeatMasker	similarity	1459485	1459713	9.6	-	.	Target "Motif:NA_COMP3515_G1_I4" 57 295
scaffold1068_cov64	RepeatMasker	similarity	1460811	1461163	0.6	+	.	Target "Motif:NA_COMP13775_G1_I1" 1 353
scaffold1068_cov64	RepeatMasker	similarity	1470763	1471029	0.4	+	.	Target "Motif:NA_COMP47085_G1_I1" 1 267
scaffold1068_cov64	RepeatMasker	similarity	1472851	1473017	5.4	-	.	Target "Motif:OTHERS_COMP3616_G1_I2" 1 167
scaffold1068_cov64	RepeatMasker	similarity	1472993	1473683	4.0	+	.	Target "Motif:OTHERS_COMP3616_G2_I2" 1 691
scaffold1068_cov64	RepeatMasker	similarity	1473652	1473871	0.5	-	.	Target "Motif:NA_COMP1265_G1_I1" 1 220
scaffold1068_cov64	RepeatMasker	similarity	1474836	1475074	3.4	+	.	Target "Motif:NA_COMP3538_G9_I1" 1 238
scaffold1068_cov64	RepeatMasker	similarity	1474945	1475103	5.0	+	.	Target "Motif:NA_COMP3538_G11_I1" 15 176
scaffold1068_cov64	RepeatMasker	similarity	1475098	1475316	1.4	+	.	Target "Motif:NA_COMP3538_G1_I4" 84 305
scaffold1068_cov64	RepeatMasker	similarity	1475676	1475919	9.1	-	.	Target "Motif:NA_COMP3507_G2_I1" 156 397
scaffold1068_cov64	RepeatMasker	similarity	1480770	1480918	9.4	+	.	Target "Motif:NA_COMP3599_G9_I2" 41 198
scaffold1068_cov64	RepeatMasker	similarity	1485967	1486244	1.4	-	.	Target "Motif:NA_COMP1506_G2_I1" 1 278
scaffold1068_cov64	RepeatMasker	similarity	1488832	1489039	8.8	-	.	Target "Motif:NA_COMP2699_G2_I1" 37 220
scaffold1068_cov64	RepeatMasker	similarity	1492720	1493012	0.3	-	.	Target "Motif:NA_COMP46367_G1_I1" 1 293
scaffold1068_cov64	RepeatMasker	similarity	1493514	1493593	10.0	-	.	Target "Motif:NA_COMP3543_G4_I2" 135 214
scaffold1068_cov64	RepeatMasker	similarity	1502111	1502315	9.3	-	.	Target "Motif:NA_COMP3486_G7_I2" 1 218
scaffold1068_cov64	RepeatMasker	similarity	1506042	1506360	0.6	-	.	Target "Motif:NA_COMP1463_G1_I1" 1 319
scaffold1068_cov64	RepeatMasker	similarity	1507139	1507373	8.1	-	.	Target "Motif:OTHERS_COMP3564_G4_I4" 339 604
scaffold1068_cov64	RepeatMasker	similarity	1507716	1508034	0.0	-	.	Target "Motif:LOW_COMPLEXITY_COMP24824_G1_I1" 2 320
scaffold1068_cov64	RepeatMasker	similarity	1510833	1511117	0.0	-	.	Target "Motif:NA_COMP33793_G1_I1" 1 285
scaffold1068_cov64	RepeatMasker	similarity	1513366	1513514	9.5	-	.	Target "Motif:NA_COMP3452_G6_I1" 9 155
scaffold1068_cov64	RepeatMasker	similarity	1513785	1514024	6.8	-	.	Target "Motif:NA_COMP3440_G3_I1" 13 249
scaffold1068_cov64	RepeatMasker	similarity	1514085	1514325	9.1	+	.	Target "Motif:OTHERS_COMP3572_G10_I3" 7 250
scaffold1068_cov64	RepeatMasker	similarity	1517167	1517419	3.6	-	.	Target "Motif:NA_COMP3402_G5_I2" 90 341
scaffold1068_cov64	RepeatMasker	similarity	1517430	1517678	7.3	-	.	Target "Motif:NA_COMP3440_G3_I1" 13 258
scaffold1068_cov64	RepeatMasker	similarity	1523702	1524109	0.0	-	.	Target "Motif:SIMPLE_REPEAT_COMP14359_G1_I1" 1 408
scaffold1068_cov64	RepeatMasker	similarity	1527915	1528130	0.0	+	.	Target "Motif:NA_COMP2187_G1_I1" 1 216
scaffold1068_cov64	RepeatMasker	similarity	1528536	1528780	7.9	+	.	Target "Motif:NA_COMP3595_G5_I3" 188 450
scaffold1068_cov64	RepeatMasker	similarity	1528890	1529047	7.0	+	.	Target "Motif:NA_COMP2944_G1_I1" 49 206
scaffold1068_cov64	RepeatMasker	similarity	1529178	1529342	0.6	+	.	Target "Motif:NA_COMP3588_G3_I1" 42 204
scaffold1068_cov64	RepeatMasker	similarity	1529207	1529410	2.5	+	.	Target "Motif:NA_COMP3588_G3_I1" 1 202
scaffold1068_cov64	RepeatMasker	similarity	1529343	1529423	8.9	+	.	Target "Motif:NA_COMP3588_G3_I1" 1 79
scaffold1068_cov64	RepeatMasker	similarity	1531784	1532017	0.0	+	.	Target "Motif:NA_COMP46981_G1_I1" 1 234
scaffold1068_cov64	RepeatMasker	similarity	1535177	1535268	6.7	+	.	Target "Motif:NA_COMP39443_G1_I1" 117 206
scaffold1068_cov64	RepeatMasker	similarity	1535420	1535772	0.0	+	.	Target "Motif:NA_COMP39443_G1_I1" 1 353
scaffold1068_cov64	RepeatMasker	similarity	1535827	1536039	2.8	-	.	Target "Motif:NA_COMP3061_G1_I1" 1 213
scaffold1068_cov64	RepeatMasker	similarity	1538912	1539090	7.5	-	.	Target "Motif:OTHERS_COMP3350_G2_I1" 232 407
scaffold1068_cov64	RepeatMasker	similarity	1539746	1539916	5.8	-	.	Target "Motif:OTHERS_COMP3545_G1_I1" 87 257
scaffold1068_cov64	RepeatMasker	similarity	1542539	1542771	7.0	+	.	Target "Motif:NA_COMP3507_G2_I1" 176 411
scaffold1068_cov64	RepeatMasker	similarity	1543899	1544137	8.9	+	.	Target "Motif:NA_COMP3584_G1_I4" 3 255
scaffold1068_cov64	RepeatMasker	similarity	1544455	1544837	0.0	-	.	Target "Motif:NA_COMP3585_G15_I1" 1 383
scaffold1068_cov64	RepeatMasker	similarity	1549967	1550188	6.3	-	.	Target "Motif:LTR_COMP3549_G16_I1" 163 383
scaffold1068_cov64	RepeatMasker	similarity	1555238	1555538	0.0	-	.	Target "Motif:NA_COMP46874_G1_I1" 1 301
scaffold1068_cov64	RepeatMasker	similarity	1556625	1556723	7.1	+	.	Target "Motif:NA_COMP3501_G11_I2" 453 555
scaffold1068_cov64	RepeatMasker	similarity	1556717	1556770	9.3	-	.	Target "Motif:NA_COMP3553_G2_I1" 37 90
scaffold1068_cov64	RepeatMasker	similarity	1557287	1557514	9.3	-	.	Target "Motif:NA_COMP3595_G5_I6" 209 438
scaffold1068_cov64	RepeatMasker	similarity	1558631	1558836	6.5	+	.	Target "Motif:NA_COMP3507_G8_I3" 24 258
scaffold1068_cov64	RepeatMasker	similarity	1572436	1572763	2.1	+	.	Target "Motif:NA_COMP49510_G1_I1" 15 342
scaffold1068_cov64	RepeatMasker	similarity	1573762	1573976	6.0	+	.	Target "Motif:NA_COMP12615_G1_I1" 1 218
scaffold1068_cov64	RepeatMasker	similarity	1574085	1574670	0.0	-	.	Target "Motif:NA_COMP4743_G1_I1" 1 586
scaffold1068_cov64	RepeatMasker	similarity	1577042	1577326	0.0	-	.	Target "Motif:NA_COMP11905_G1_I1" 1 285
scaffold1068_cov64	RepeatMasker	similarity	1579505	1579761	0.4	+	.	Target "Motif:NA_COMP34295_G1_I1" 1 257
scaffold1068_cov64	RepeatMasker	similarity	1580519	1580779	1.9	+	.	Target "Motif:NA_COMP10628_G1_I1" 1 261
scaffold1068_cov64	RepeatMasker	similarity	1581139	1581263	3.2	+	.	Target "Motif:NA_COMP3583_G2_I2" 33 157
scaffold1068_cov64	RepeatMasker	similarity	1581498	1581728	7.9	+	.	Target "Motif:NA_COMP3507_G2_I1" 160 388
scaffold1068_cov64	RepeatMasker	similarity	1582304	1582363	6.7	-	.	Target "Motif:NA_COMP3510_G5_I4" 218 277
scaffold1068_cov64	RepeatMasker	similarity	1584824	1584979	9.9	+	.	Target "Motif:NA_COMP3458_G3_I1" 1 155
scaffold1068_cov64	RepeatMasker	similarity	1586412	1586711	3.1	-	.	Target "Motif:NA_COMP3538_G9_I1" 1 288
scaffold1068_cov64	RepeatMasker	similarity	1586756	1587032	6.4	-	.	Target "Motif:OTHERS_COMP3538_G12_I1" 53 318
scaffold1068_cov64	RepeatMasker	similarity	1587952	1588231	0.0	+	.	Target "Motif:NA_COMP24904_G1_I1" 1 280
scaffold1068_cov64	RepeatMasker	similarity	1593668	1593945	0.0	-	.	Target "Motif:NA_COMP47768_G1_I1" 2 279
scaffold1068_cov64	RepeatMasker	similarity	1599943	1600328	0.5	-	.	Target "Motif:NA_COMP36566_G1_I1" 1 386
scaffold1068_cov64	RepeatMasker	similarity	1605889	1606158	0.0	+	.	Target "Motif:NA_COMP25329_G1_I1" 1 270
scaffold1068_cov64	RepeatMasker	similarity	1611789	1612174	0.3	+	.	Target "Motif:LINE_COMP21203_G1_I1" 1 386
scaffold1068_cov64	RepeatMasker	similarity	1618599	1619130	0.0	-	.	Target "Motif:NA_COMP15028_G1_I1" 3 534
scaffold1068_cov64	RepeatMasker	similarity	1619186	1619593	0.0	+	.	Target "Motif:NA_COMP17710_G1_I1" 1 408
scaffold1068_cov64	RepeatMasker	similarity	1621732	1622352	0.0	+	.	Target "Motif:NA_COMP22312_G1_I1" 1 621
scaffold1068_cov64	RepeatMasker	similarity	1623722	1623995	0.4	+	.	Target "Motif:NA_COMP49004_G1_I1" 1 274
scaffold1068_cov64	RepeatMasker	similarity	1626895	1627092	0.0	-	.	Target "Motif:NA_COMP51047_G1_I1" 1 198
scaffold1068_cov64	RepeatMasker	similarity	1631822	1632116	0.0	-	.	Target "Motif:NA_COMP38787_G1_I1" 1 295
scaffold1068_cov64	RepeatMasker	similarity	1644412	1644734	0.3	-	.	Target "Motif:SIMPLE_REPEAT_COMP4365_G1_I1" 1 323
scaffold1068_cov64	RepeatMasker	similarity	1649257	1649481	0.0	-	.	Target "Motif:NA_COMP38866_G1_I1" 1 225
scaffold1068_cov64	RepeatMasker	similarity	1650325	1650625	0.0	+	.	Target "Motif:NA_COMP42610_G1_I1" 1 301
scaffold1068_cov64	RepeatMasker	similarity	1652716	1653239	0.0	-	.	Target "Motif:NA_COMP35212_G1_I1" 1 524
scaffold1068_cov64	RepeatMasker	similarity	1655354	1655674	0.0	-	.	Target "Motif:NA_COMP22995_G1_I1" 1 321
scaffold1068_cov64	RepeatMasker	similarity	1657872	1658300	0.0	-	.	Target "Motif:NA_COMP20075_G1_I1" 1 429
scaffold1068_cov64	RepeatMasker	similarity	1662751	1663318	0.0	+	.	Target "Motif:NA_COMP41733_G1_I1" 1 568
scaffold1068_cov64	RepeatMasker	similarity	1665181	1665490	0.0	+	.	Target "Motif:NA_COMP5902_G1_I1" 1 310
scaffold1068_cov64	RepeatMasker	similarity	1666613	1666770	4.4	+	.	Target "Motif:NA_COMP3486_G7_I2" 1 183
scaffold1068_cov64	RepeatMasker	similarity	1666747	1667067	0.0	+	.	Target "Motif:NA_COMP27915_G1_I1" 1 321
scaffold1068_cov64	RepeatMasker	similarity	1667316	1667748	0.0	+	.	Target "Motif:NA_COMP3595_G7_I1" 1 433
scaffold1068_cov64	RepeatMasker	similarity	1668911	1669153	0.0	-	.	Target "Motif:NA_COMP44511_G1_I1" 1 243
scaffold1068_cov64	RepeatMasker	similarity	1670281	1670472	4.7	+	.	Target "Motif:NA_COMP3507_G2_I1" 207 396
scaffold1068_cov64	RepeatMasker	similarity	1670432	1670642	0.0	+	.	Target "Motif:NA_COMP21693_G1_I1" 1 211
scaffold1068_cov64	RepeatMasker	similarity	1670830	1670919	7.8	-	.	Target "Motif:NA_COMP3595_G5_I3" 232 328
scaffold1068_cov64	RepeatMasker	similarity	1671566	1671783	7.3	+	.	Target "Motif:OTHERS_COMP3540_G9_I2" 204 444
scaffold1068_cov64	RepeatMasker	similarity	1671781	1671908	7.8	+	.	Target "Motif:NA_COMP1109_G1_I1" 243 375
scaffold1068_cov64	RepeatMasker	similarity	1679017	1679222	8.0	-	.	Target "Motif:NA_COMP3593_G5_I2" 125 325
scaffold1068_cov64	RepeatMasker	similarity	1682992	1683139	8.1	+	.	Target "Motif:NA_COMP3490_G8_I1" 105 252
scaffold1068_cov64	RepeatMasker	similarity	1685771	1685982	0.0	-	.	Target "Motif:NA_COMP25657_G1_I1" 1 212
scaffold1068_cov64	RepeatMasker	similarity	1687007	1687185	9.8	-	.	Target "Motif:NA_COMP3590_G6_I1" 1 170
scaffold1068_cov64	RepeatMasker	similarity	1687486	1687792	0.0	+	.	Target "Motif:NA_COMP29166_G1_I1" 1 307
scaffold1068_cov64	RepeatMasker	similarity	1687792	1687892	9.9	+	.	Target "Motif:NA_COMP3501_G11_I2" 464 564
scaffold1068_cov64	RepeatMasker	similarity	1690954	1691332	0.0	-	.	Target "Motif:NA_COMP35733_G1_I1" 1 379
scaffold1068_cov64	RepeatMasker	similarity	1692417	1692617	7.0	-	.	Target "Motif:NA_COMP3422_G2_I1" 173 373
scaffold1068_cov64	RepeatMasker	similarity	1692552	1692803	8.0	-	.	Target "Motif:NA_COMP3422_G4_I1" 44 330
scaffold1068_cov64	RepeatMasker	similarity	1695983	1696262	0.0	-	.	Target "Motif:NA_COMP241_G1_I1" 1 280
scaffold1068_cov64	RepeatMasker	similarity	1697801	1698035	4.8	+	.	Target "Motif:NA_COMP3431_G3_I1" 92 324
scaffold1068_cov64	RepeatMasker	similarity	1705132	1705567	0.0	+	.	Target "Motif:NA_COMP29583_G1_I1" 1 436
scaffold1068_cov64	RepeatMasker	similarity	1706125	1706534	0.0	+	.	Target "Motif:NA_COMP17592_G1_I1" 1 410
scaffold1068_cov64	RepeatMasker	similarity	1719113	1719461	0.3	-	.	Target "Motif:NA_COMP29668_G1_I1" 1 349
scaffold1068_cov64	RepeatMasker	similarity	1720156	1720415	0.4	-	.	Target "Motif:NA_COMP37181_G1_I1" 1 260
scaffold1068_cov64	RepeatMasker	similarity	1724040	1724453	0.2	+	.	Target "Motif:NA_COMP5081_G1_I1" 1 414
scaffold1068_cov64	RepeatMasker	similarity	1732892	1733142	0.0	-	.	Target "Motif:NA_COMP39255_G1_I1" 1 251
scaffold1068_cov64	RepeatMasker	similarity	1746436	1746838	0.0	-	.	Target "Motif:NA_COMP19819_G1_I1" 1 403
scaffold1068_cov64	RepeatMasker	similarity	1746908	1747179	0.4	+	.	Target "Motif:SIMPLE_REPEAT_COMP44129_G1_I1" 1 272
scaffold1068_cov64	RepeatMasker	similarity	1751547	1752120	0.0	-	.	Target "Motif:NA_COMP33377_G1_I1" 1 574
scaffold1068_cov64	RepeatMasker	similarity	1757685	1757973	0.0	+	.	Target "Motif:NA_COMP9530_G1_I1" 1 289
scaffold1068_cov64	RepeatMasker	similarity	1758129	1758396	0.0	+	.	Target "Motif:NA_COMP509_G1_I1" 1 268
scaffold1068_cov64	RepeatMasker	similarity	1759248	1759519	0.0	+	.	Target "Motif:NA_COMP19493_G1_I1" 1 272
scaffold1068_cov64	RepeatMasker	similarity	1760907	1761024	9.6	-	.	Target "Motif:NA_COMP2111_G1_I1" 472 586
scaffold1068_cov64	RepeatMasker	similarity	1761369	1761441	8.8	-	.	Target "Motif:NA_COMP3381_G2_I2" 58 128
scaffold1068_cov64	RepeatMasker	similarity	1761438	1761544	2.8	+	.	Target "Motif:NA_COMP3606_G15_I5" 28 134
scaffold1068_cov64	RepeatMasker	similarity	1761543	1761682	9.3	-	.	Target "Motif:NA_COMP3240_G1_I1" 54 194
scaffold1068_cov64	RepeatMasker	similarity	1767429	1767682	0.0	-	.	Target "Motif:NA_COMP48118_G1_I1" 1 254
scaffold1068_cov64	RepeatMasker	similarity	1768963	1769114	7.9	-	.	Target "Motif:NA_COMP29103_G1_I1" 216 367
scaffold1068_cov64	RepeatMasker	similarity	1777513	1777824	0.0	-	.	Target "Motif:NA_COMP26135_G1_I1" 1 312
scaffold1068_cov64	RepeatMasker	similarity	1783756	1783904	8.2	-	.	Target "Motif:NA_COMP3595_G5_I5" 250 422
scaffold1068_cov64	RepeatMasker	similarity	1783790	1783904	7.0	-	.	Target "Motif:NA_COMP3595_G5_I4" 250 365
scaffold1068_cov64	RepeatMasker	similarity	1788415	1788711	3.8	+	.	Target "Motif:NA_COMP35016_G1_I1" 1 292
scaffold1068_cov64	RepeatMasker	similarity	1789648	1789740	6.5	-	.	Target "Motif:NA_COMP3606_G15_I5" 99 194
scaffold1068_cov64	RepeatMasker	similarity	1789735	1789809	9.7	+	.	Target "Motif:NA_COMP3595_G5_I1" 449 520
scaffold1068_cov64	RepeatMasker	similarity	1789747	1789948	6.1	-	.	Target "Motif:NA_COMP3507_G8_I3" 63 258
scaffold1068_cov64	RepeatMasker	similarity	1789949	1790072	9.7	-	.	Target "Motif:NA_COMP3606_G15_I5" 1 131
scaffold1068_cov64	RepeatMasker	similarity	1794266	1794615	0.0	+	.	Target "Motif:NA_COMP32323_G1_I1" 1 350
scaffold1068_cov64	RepeatMasker	similarity	1794938	1795372	0.0	-	.	Target "Motif:NA_COMP13996_G1_I1" 1 435
scaffold1068_cov64	RepeatMasker	similarity	1796379	1796741	0.0	-	.	Target "Motif:NA_COMP6075_G1_I1" 1 363
scaffold1068_cov64	RepeatMasker	similarity	1796813	1797377	0.0	-	.	Target "Motif:NA_COMP5027_G1_I1" 1 565
scaffold1068_cov64	RepeatMasker	similarity	1802373	1802591	0.5	+	.	Target "Motif:OTHERS_COMP3229_G5_I1" 1 219
scaffold1068_cov64	RepeatMasker	similarity	1805269	1805537	0.4	+	.	Target "Motif:NA_COMP50825_G1_I1" 1 269
scaffold1068_cov64	RepeatMasker	similarity	1805537	1806004	6.0	-	.	Target "Motif:NA_COMP2433_G1_I1" 1 463
scaffold1068_cov64	RepeatMasker	similarity	1808799	1809116	0.0	-	.	Target "Motif:NA_COMP28633_G1_I1" 1 318
scaffold1068_cov64	RepeatMasker	similarity	1811054	1811646	0.0	-	.	Target "Motif:NA_COMP25786_G1_I1" 1 593
scaffold1068_cov64	RepeatMasker	similarity	1812439	1812628	5.3	-	.	Target "Motif:NA_COMP3507_G2_I5" 66 254
scaffold1068_cov64	RepeatMasker	similarity	1812706	1812897	7.5	+	.	Target "Motif:NA_COMP3593_G5_I2" 163 349
scaffold1068_cov64	RepeatMasker	similarity	1817165	1817381	0.0	+	.	Target "Motif:NA_COMP2128_G1_I1" 1 217
scaffold1068_cov64	RepeatMasker	similarity	1819112	1819357	0.4	+	.	Target "Motif:SIMPLE_REPEAT_COMP5457_G1_I1" 1 246
scaffold1068_cov64	RepeatMasker	similarity	1825973	1826222	0.0	+	.	Target "Motif:NA_COMP33499_G1_I1" 1 250
scaffold1068_cov64	RepeatMasker	similarity	1826569	1826774	9.9	-	.	Target "Motif:NA_COMP3501_G12_I1" 43 245
scaffold1068_cov64	RepeatMasker	similarity	1827253	1827491	8.4	+	.	Target "Motif:OTHERS_COMP3540_G9_I2" 202 444
scaffold1068_cov64	RepeatMasker	similarity	1828703	1828909	0.0	-	.	Target "Motif:NA_COMP48633_G1_I1" 1 207
scaffold1068_cov64	RepeatMasker	similarity	1832516	1832791	0.0	+	.	Target "Motif:NA_COMP50957_G1_I1" 1 276
scaffold1068_cov64	RepeatMasker	similarity	1835961	1836259	0.3	+	.	Target "Motif:NA_COMP6000_G1_I1" 1 299
scaffold1068_cov64	RepeatMasker	similarity	1852651	1852995	0.0	-	.	Target "Motif:NA_COMP9043_G1_I1" 1 345
scaffold1068_cov64	RepeatMasker	similarity	1858348	1858564	1.4	-	.	Target "Motif:NA_COMP930_G1_I1" 1 217
scaffold1068_cov64	RepeatMasker	similarity	1858580	1858742	8.2	+	.	Target "Motif:NA_COMP3510_G10_I1" 1 159
scaffold1068_cov64	RepeatMasker	similarity	1860276	1860537	0.0	+	.	Target "Motif:NA_COMP36129_G1_I1" 1 262
scaffold1068_cov64	RepeatMasker	similarity	1860985	1861347	0.0	-	.	Target "Motif:NA_COMP22571_G1_I1" 1 363
scaffold1068_cov64	RepeatMasker	similarity	1864343	1864570	9.6	-	.	Target "Motif:NA_COMP3486_G10_I1" 1 219
scaffold1068_cov64	RepeatMasker	similarity	1865985	1866253	1.1	+	.	Target "Motif:NA_COMP18358_G1_I1" 1 269
scaffold1068_cov64	RepeatMasker	similarity	1870714	1870982	9.0	+	.	Target "Motif:NA_COMP3507_G2_I1" 128 401
scaffold1068_cov64	RepeatMasker	similarity	1880042	1880267	0.0	-	.	Target "Motif:NA_COMP36919_G1_I1" 17 242
scaffold1068_cov64	RepeatMasker	similarity	1883219	1883731	0.0	-	.	Target "Motif:SIMPLE_REPEAT_COMP39134_G1_I1" 1 513
scaffold1068_cov64	RepeatMasker	similarity	1897519	1897835	1.3	-	.	Target "Motif:OTHERS_COMP3487_G15_I2" 117 436
scaffold1068_cov64	RepeatMasker	similarity	1897819	1898026	0.0	-	.	Target "Motif:NA_COMP5525_G1_I1" 1 208
scaffold1068_cov64	RepeatMasker	similarity	1902027	1902302	0.0	+	.	Target "Motif:NA_COMP11993_G1_I1" 1 276
scaffold1068_cov64	RepeatMasker	similarity	1904312	1904541	0.0	+	.	Target "Motif:SIMPLE_REPEAT_COMP23384_G1_I1" 1 230
scaffold1068_cov64	RepeatMasker	similarity	1908020	1908318	1.7	-	.	Target "Motif:NA_COMP26847_G1_I1" 1 299
scaffold106921_cov62	RepeatMasker	similarity	1	402	6.6	+	.	Target "Motif:LTR_COMP3615_G1_I1" 644 1055
scaffold106921_cov62	RepeatMasker	similarity	277	537	7.1	+	.	Target "Motif:LTR_COMP3615_G1_I1" 825 1069
scaffold10699_cov62	RepeatMasker	similarity	1	205	0.5	+	.	Target "Motif:NA_COMP49777_G1_I1" 30 219
scaffold10699_cov62	RepeatMasker	similarity	601	740	10.0	-	.	Target "Motif:NA_COMP3464_G6_I1" 1 140
scaffold1069_cov65	RepeatMasker	similarity	1391	1776	0.5	-	.	Target "Motif:NA_COMP11834_G1_I1" 1 386
scaffold1069_cov65	RepeatMasker	similarity	7528	7796	0.4	+	.	Target "Motif:NA_COMP22154_G1_I1" 1 269
scaffold1069_cov65	RepeatMasker	similarity	13342	13627	0.3	+	.	Target "Motif:NA_COMP27266_G1_I1" 1 286
scaffold1069_cov65	RepeatMasker	similarity	17482	17750	0.0	+	.	Target "Motif:NA_COMP3452_G12_I1" 1 269
scaffold1069_cov65	RepeatMasker	similarity	24094	24319	2.2	+	.	Target "Motif:NA_COMP34206_G1_I1" 1 226
scaffold1069_cov65	RepeatMasker	similarity	24523	25085	0.0	-	.	Target "Motif:NA_COMP29239_G1_I1" 1 563
scaffold1069_cov65	RepeatMasker	similarity	27724	28057	8.7	+	.	Target "Motif:NA_COMP3382_G1_I1" 2 340
scaffold1069_cov65	RepeatMasker	similarity	29464	29678	8.8	-	.	Target "Motif:NA_COMP3155_G3_I1" 89 303
scaffold1069_cov65	RepeatMasker	similarity	34457	34824	5.2	-	.	Target "Motif:NA_COMP5840_G1_I1" 1 368
scaffold1069_cov65	RepeatMasker	similarity	49650	49917	0.0	-	.	Target "Motif:NA_COMP14515_G1_I1" 1 268
scaffold1069_cov65	RepeatMasker	similarity	50326	50824	0.6	+	.	Target "Motif:NA_COMP4910_G1_I1" 1 499
scaffold1069_cov65	RepeatMasker	similarity	51360	51718	0.0	-	.	Target "Motif:NA_COMP18044_G1_I1" 1 359
scaffold1069_cov65	RepeatMasker	similarity	52620	52783	9.8	-	.	Target "Motif:NA_COMP2385_G1_I1" 47 215
scaffold1069_cov65	RepeatMasker	similarity	69653	69953	0.7	+	.	Target "Motif:NA_COMP24563_G1_I1" 1 301
scaffold1069_cov65	RepeatMasker	similarity	70678	71071	0.0	-	.	Target "Motif:NA_COMP11235_G1_I1" 1 394
scaffold1069_cov65	RepeatMasker	similarity	83067	83395	0.9	+	.	Target "Motif:OTHERS_COMP21378_G1_I1" 1 332
scaffold1069_cov65	RepeatMasker	similarity	83337	83534	9.1	+	.	Target "Motif:OTHERS_COMP3480_G7_I2" 18 224
scaffold1069_cov65	RepeatMasker	similarity	83758	84067	0.0	+	.	Target "Motif:OTHERS_COMP42551_G1_I1" 1 310
scaffold1069_cov65	RepeatMasker	similarity	87048	87272	0.0	-	.	Target "Motif:SIMPLE_REPEAT_COMP42634_G1_I1" 1 225
scaffold1069_cov65	RepeatMasker	similarity	89405	89712	0.7	+	.	Target "Motif:NA_COMP39411_G1_I1" 1 308
scaffold1069_cov65	RepeatMasker	similarity	98998	99054	5.3	+	.	Target "Motif:NA_COMP3594_G11_I1" 79 135
scaffold1069_cov65	RepeatMasker	similarity	99199	99412	4.3	+	.	Target "Motif:NA_COMP3440_G3_I1" 18 252
scaffold1069_cov65	RepeatMasker	similarity	99620	99872	0.0	-	.	Target "Motif:NA_COMP38514_G1_I1" 1 253
scaffold1069_cov65	RepeatMasker	similarity	104370	104744	0.0	-	.	Target "Motif:NA_COMP4268_G1_I1" 1 375
scaffold1069_cov65	RepeatMasker	similarity	109684	109849	8.4	-	.	Target "Motif:OTHERS_COMP3540_G9_I4" 71 236
scaffold1069_cov65	RepeatMasker	similarity	109848	109914	7.5	+	.	Target "Motif:OTHERS_COMP3540_G9_I2" 202 272
scaffold1069_cov65	RepeatMasker	similarity	113821	113967	9.5	+	.	Target "Motif:NA_COMP3490_G3_I5" 1 151
scaffold1069_cov65	RepeatMasker	similarity	127504	127813	0.7	+	.	Target "Motif:NA_COMP19183_G1_I1" 1 310
scaffold1069_cov65	RepeatMasker	similarity	128921	129226	0.0	+	.	Target "Motif:NA_COMP44152_G1_I1" 1 306
scaffold1069_cov65	RepeatMasker	similarity	132688	132947	0.4	-	.	Target "Motif:NA_COMP29364_G1_I1" 1 260
scaffold1069_cov65	RepeatMasker	similarity	136413	136591	8.4	-	.	Target "Motif:NA_COMP3567_G7_I3" 132 314
scaffold1069_cov65	RepeatMasker	similarity	137913	138112	6.5	+	.	Target "Motif:NA_COMP3595_G11_I2" 118 319
scaffold1069_cov65	RepeatMasker	similarity	139134	139418	0.0	+	.	Target "Motif:NA_COMP27675_G1_I1" 1 285
scaffold1069_cov65	RepeatMasker	similarity	140086	140613	0.0	-	.	Target "Motif:NA_COMP37553_G1_I1" 1 528
scaffold1069_cov65	RepeatMasker	similarity	143863	144110	6.1	+	.	Target "Motif:NA_COMP3507_G2_I1" 145 395
scaffold1069_cov65	RepeatMasker	similarity	145870	146269	0.5	-	.	Target "Motif:NA_COMP14237_G1_I1" 1 400
scaffold1069_cov65	RepeatMasker	similarity	148222	148583	0.3	+	.	Target "Motif:SIMPLE_REPEAT_COMP46580_G1_I1" 1 362
scaffold1069_cov65	RepeatMasker	similarity	149333	149432	7.1	-	.	Target "Motif:NA_COMP3593_G5_I2" 128 230
scaffold1069_cov65	RepeatMasker	similarity	170128	170576	0.2	-	.	Target "Motif:NA_COMP34197_G1_I1" 1 449
scaffold1069_cov65	RepeatMasker	similarity	172132	172621	0.0	+	.	Target "Motif:NA_COMP2406_G1_I1" 1 490
scaffold1069_cov65	RepeatMasker	similarity	176615	177217	2.0	-	.	Target "Motif:NA_COMP11986_G1_I1" 1 598
scaffold1069_cov65	RepeatMasker	similarity	177780	178050	0.4	-	.	Target "Motif:NA_COMP26894_G1_I1" 1 271
scaffold1069_cov65	RepeatMasker	similarity	178294	178545	7.2	+	.	Target "Motif:NA_COMP3507_G2_I1" 148 397
scaffold1069_cov65	RepeatMasker	similarity	178810	179148	0.0	-	.	Target "Motif:NA_COMP39809_G1_I1" 1 339
scaffold1069_cov65	RepeatMasker	similarity	181364	181434	8.4	+	.	Target "Motif:NA_COMP3461_G3_I1" 124 194
scaffold1069_cov65	RepeatMasker	similarity	181703	181912	9.1	-	.	Target "Motif:NA_COMP3439_G1_I1" 83 294
scaffold1069_cov65	RepeatMasker	similarity	182035	182247	8.5	+	.	Target "Motif:NA_COMP3595_G5_I1" 208 421
scaffold1069_cov65	RepeatMasker	similarity	186935	187279	0.0	+	.	Target "Motif:NA_COMP8614_G1_I1" 1 345
scaffold1069_cov65	RepeatMasker	similarity	187679	187947	0.4	+	.	Target "Motif:NA_COMP22945_G1_I1" 1 269
scaffold1069_cov65	RepeatMasker	similarity	189252	189503	10.0	+	.	Target "Motif:OTHERS_COMP3572_G10_I3" 4 258
scaffold1069_cov65	RepeatMasker	similarity	189510	189883	0.5	-	.	Target "Motif:NA_COMP36241_G1_I1" 1 374
scaffold1069_cov65	RepeatMasker	similarity	193496	193766	0.7	+	.	Target "Motif:NA_COMP23853_G1_I1" 1 271
scaffold1069_cov65	RepeatMasker	similarity	195069	195328	0.8	-	.	Target "Motif:NA_COMP26609_G1_I1" 1 260
scaffold1069_cov65	RepeatMasker	similarity	201113	201664	0.4	-	.	Target "Motif:NA_COMP34972_G1_I1" 1 552
scaffold1069_cov65	RepeatMasker	similarity	201886	202073	5.9	+	.	Target "Motif:NA_COMP3486_G7_I2" 3 190
scaffold1069_cov65	RepeatMasker	similarity	214083	214243	8.1	-	.	Target "Motif:NA_COMP3439_G4_I1" 40 200
scaffold1069_cov65	RepeatMasker	similarity	218661	218984	0.6	+	.	Target "Motif:NA_COMP4026_G1_I1" 3 326
scaffold1069_cov65	RepeatMasker	similarity	219488	219782	0.0	-	.	Target "Motif:NA_COMP50529_G1_I1" 1 295
scaffold1069_cov65	RepeatMasker	similarity	223603	223732	8.5	-	.	Target "Motif:NA_COMP11615_G1_I1" 365 494
scaffold1069_cov65	RepeatMasker	similarity	226111	226495	0.0	+	.	Target "Motif:NA_COMP31973_G1_I1" 1 385
scaffold1069_cov65	RepeatMasker	similarity	227049	227108	8.3	-	.	Target "Motif:NA_COMP3441_G1_I1" 182 244
scaffold1069_cov65	RepeatMasker	similarity	227109	227225	6.8	-	.	Target "Motif:NA_COMP3441_G1_I2" 3 119
scaffold1069_cov65	RepeatMasker	similarity	232968	233288	0.0	+	.	Target "Motif:NA_COMP12018_G1_I1" 1 321
scaffold1069_cov65	RepeatMasker	similarity	233469	234034	0.2	+	.	Target "Motif:NA_COMP36957_G1_I1" 1 566
scaffold1069_cov65	RepeatMasker	similarity	236386	236707	0.0	+	.	Target "Motif:NA_COMP48313_G1_I1" 1 322
scaffold1069_cov65	RepeatMasker	similarity	237441	237563	7.3	-	.	Target "Motif:OTHERS_COMP3572_G10_I6" 102 224
scaffold1069_cov65	RepeatMasker	similarity	259625	259795	8.2	-	.	Target "Motif:NA_COMP3391_G24_I2" 496 667
scaffold1069_cov65	RepeatMasker	similarity	264079	264378	0.0	-	.	Target "Motif:NA_COMP11693_G1_I1" 1 300
scaffold1069_cov65	RepeatMasker	similarity	268468	269032	0.0	+	.	Target "Motif:NA_COMP12617_G1_I1" 1 565
scaffold1069_cov65	RepeatMasker	similarity	275633	276234	0.0	-	.	Target "Motif:NA_COMP43899_G1_I1" 1 602
scaffold1069_cov65	RepeatMasker	similarity	277831	278148	0.0	-	.	Target "Motif:NA_COMP30293_G1_I1" 1 318
scaffold1069_cov65	RepeatMasker	similarity	279265	279884	0.0	+	.	Target "Motif:NA_COMP9821_G1_I1" 1 620
scaffold1069_cov65	RepeatMasker	similarity	281899	281990	6.5	-	.	Target "Motif:NA_COMP3531_G12_I1" 5 96
scaffold1069_cov65	RepeatMasker	similarity	281909	282198	0.0	-	.	Target "Motif:NA_COMP23331_G1_I1" 1 290
scaffold1069_cov65	RepeatMasker	similarity	282172	282412	5.4	-	.	Target "Motif:NA_COMP3586_G4_I2" 109 359
scaffold1069_cov65	RepeatMasker	similarity	286131	286368	2.9	-	.	Target "Motif:NA_COMP3604_G5_I1" 1 251
scaffold1069_cov65	RepeatMasker	similarity	295736	296018	0.0	-	.	Target "Motif:NA_COMP26200_G1_I1" 1 283
scaffold1069_cov65	RepeatMasker	similarity	309880	310141	0.0	+	.	Target "Motif:NA_COMP47732_G1_I1" 18 279
scaffold1069_cov65	RepeatMasker	similarity	316631	317018	0.0	+	.	Target "Motif:OTHERS_COMP13979_G1_I1" 1 388
scaffold1069_cov65	RepeatMasker	similarity	327348	327774	5.4	+	.	Target "Motif:SIMPLE_REPEAT_COMP5227_G1_I1" 151 576
scaffold1069_cov65	RepeatMasker	similarity	331089	331637	0.0	+	.	Target "Motif:NA_COMP15848_G1_I1" 1 549
scaffold1069_cov65	RepeatMasker	similarity	333578	333894	0.0	+	.	Target "Motif:NA_COMP38524_G1_I1" 1 317
scaffold1069_cov65	RepeatMasker	similarity	337580	337868	1.0	-	.	Target "Motif:NA_COMP48110_G1_I1" 1 289
scaffold1069_cov65	RepeatMasker	similarity	350202	350720	0.4	+	.	Target "Motif:NA_COMP24836_G1_I1" 1 514
scaffold1069_cov65	RepeatMasker	similarity	353454	353752	0.0	-	.	Target "Motif:NA_COMP29610_G1_I1" 1 299
scaffold1069_cov65	RepeatMasker	similarity	358192	358465	0.0	+	.	Target "Motif:NA_COMP28395_G1_I1" 1 274
scaffold1069_cov65	RepeatMasker	similarity	362396	362789	0.0	+	.	Target "Motif:SIMPLE_REPEAT_COMP41265_G1_I1" 1 394
scaffold1069_cov65	RepeatMasker	similarity	370145	370416	0.0	+	.	Target "Motif:NA_COMP31194_G1_I1" 1 272
scaffold1069_cov65	RepeatMasker	similarity	382078	382494	0.0	+	.	Target "Motif:NA_COMP21130_G1_I1" 1 417
scaffold1069_cov65	RepeatMasker	similarity	391076	391639	0.3	+	.	Target "Motif:NA_COMP41907_G1_I1" 1 564
scaffold1069_cov65	RepeatMasker	similarity	393444	393874	0.2	+	.	Target "Motif:NA_COMP44606_G1_I1" 1 431
scaffold1069_cov65	RepeatMasker	similarity	394120	394451	3.0	+	.	Target "Motif:NA_COMP44619_G1_I1" 1 332
scaffold1069_cov65	RepeatMasker	similarity	394387	394527	9.9	-	.	Target "Motif:NA_COMP38511_G1_I1" 12 156
scaffold1069_cov65	RepeatMasker	similarity	395445	395710	0.0	+	.	Target "Motif:SIMPLE_REPEAT_COMP31824_G1_I1" 1 266
scaffold1069_cov65	RepeatMasker	similarity	398615	398874	0.0	+	.	Target "Motif:NA_COMP2302_G2_I1" 1 260
scaffold1069_cov65	RepeatMasker	similarity	400524	400831	0.0	+	.	Target "Motif:NA_COMP24808_G1_I1" 1 308
scaffold1069_cov65	RepeatMasker	similarity	401856	401989	9.7	-	.	Target "Motif:NA_COMP3542_G4_I1" 20 157
scaffold1069_cov65	RepeatMasker	similarity	402818	403280	0.0	+	.	Target "Motif:NA_COMP41632_G1_I1" 1 463
scaffold1069_cov65	RepeatMasker	similarity	408981	409160	8.2	-	.	Target "Motif:NA_COMP3587_G6_I4" 1 171
scaffold1069_cov65	RepeatMasker	similarity	409486	410063	0.2	+	.	Target "Motif:NA_COMP14372_G1_I1" 1 578
scaffold1069_cov65	RepeatMasker	similarity	411473	411744	0.4	-	.	Target "Motif:NA_COMP15462_G1_I1" 1 272
scaffold1069_cov65	RepeatMasker	similarity	412863	413079	1.8	-	.	Target "Motif:NA_COMP17460_G1_I1" 1 217
scaffold1069_cov65	RepeatMasker	similarity	416820	417046	8.5	+	.	Target "Motif:NA_COMP3507_G2_I1" 174 396
scaffold1069_cov65	RepeatMasker	similarity	417241	417638	0.0	-	.	Target "Motif:NA_COMP45804_G1_I1" 16 413
scaffold1069_cov65	RepeatMasker	similarity	424613	424895	0.0	-	.	Target "Motif:NA_COMP36869_G1_I1" 1 283
scaffold1069_cov65	RepeatMasker	similarity	425800	426069	0.0	-	.	Target "Motif:NA_COMP30079_G1_I1" 1 270
scaffold1069_cov65	RepeatMasker	similarity	428083	428473	7.5	+	.	Target "Motif:NA_COMP7329_G1_I1" 1 388
scaffold1069_cov65	RepeatMasker	similarity	428896	429126	4.9	+	.	Target "Motif:NA_COMP3593_G5_I2" 124 348
scaffold1069_cov65	RepeatMasker	similarity	431135	431459	1.5	+	.	Target "Motif:NA_COMP50105_G1_I1" 1 325
scaffold1069_cov65	RepeatMasker	similarity	431753	431989	2.6	+	.	Target "Motif:NA_COMP2625_G2_I1" 7 233
scaffold1069_cov65	RepeatMasker	similarity	432379	432482	1.0	-	.	Target "Motif:OTHERS_COMP3572_G6_I2" 36 139
scaffold1069_cov65	RepeatMasker	similarity	433189	433336	8.8	-	.	Target "Motif:NA_COMP3507_G2_I1" 149 296
scaffold1069_cov65	RepeatMasker	similarity	440514	440816	8.9	+	.	Target "Motif:NA_COMP3468_G6_I1" 1 306
scaffold1069_cov65	RepeatMasker	similarity	448937	449236	0.0	-	.	Target "Motif:NA_COMP3467_G5_I1" 1 300
scaffold1069_cov65	RepeatMasker	similarity	455912	456204	0.0	-	.	Target "Motif:NA_COMP15578_G1_I1" 1 293
scaffold1069_cov65	RepeatMasker	similarity	462609	462893	0.0	-	.	Target "Motif:NA_COMP22729_G1_I1" 1 285
scaffold1069_cov65	RepeatMasker	similarity	464523	464647	9.7	-	.	Target "Motif:NA_COMP32154_G1_I1" 339 468
scaffold1069_cov65	RepeatMasker	similarity	466444	466696	7.6	-	.	Target "Motif:NA_COMP3507_G2_I1" 148 398
scaffold1069_cov65	RepeatMasker	similarity	468614	468837	7.1	+	.	Target "Motif:NA_COMP25455_G1_I1" 1 228
scaffold1069_cov65	RepeatMasker	similarity	468664	468887	6.2	-	.	Target "Motif:NA_COMP3572_G8_I1" 1 224
scaffold1069_cov65	RepeatMasker	similarity	470341	470394	5.6	+	.	Target "Motif:NA_COMP3595_G14_I1" 225 279
scaffold1069_cov65	RepeatMasker	similarity	474496	474809	1.0	-	.	Target "Motif:NA_COMP16376_G1_I1" 1 314
scaffold1069_cov65	RepeatMasker	similarity	490586	490855	0.0	+	.	Target "Motif:NA_COMP13872_G1_I1" 1 270
scaffold1069_cov65	RepeatMasker	similarity	490978	491256	0.0	-	.	Target "Motif:NA_COMP20624_G1_I1" 1 279
scaffold1069_cov65	RepeatMasker	similarity	492779	493090	0.0	+	.	Target "Motif:NA_COMP38491_G1_I1" 1 312
scaffold1069_cov65	RepeatMasker	similarity	494144	494337	5.7	-	.	Target "Motif:NA_COMP3507_G2_I1" 148 398
scaffold1069_cov65	RepeatMasker	similarity	494475	494694	9.2	+	.	Target "Motif:NA_COMP3577_G3_I4" 19 236
scaffold1069_cov65	RepeatMasker	similarity	499479	499960	0.0	-	.	Target "Motif:NA_COMP18095_G1_I1" 1 482
scaffold1069_cov65	RepeatMasker	similarity	499915	500177	9.2	-	.	Target "Motif:NA_COMP2356_G1_I1" 3 271
scaffold1069_cov65	RepeatMasker	similarity	502100	502318	8.7	-	.	Target "Motif:NA_COMP3487_G17_I1" 1 222
scaffold1069_cov65	RepeatMasker	similarity	506639	506925	0.0	-	.	Target "Motif:NA_COMP33227_G1_I1" 1 287
scaffold1069_cov65	RepeatMasker	similarity	507405	507619	0.9	-	.	Target "Motif:NA_COMP41853_G1_I1" 18 232
scaffold1069_cov65	RepeatMasker	similarity	511238	511550	2.9	+	.	Target "Motif:NA_COMP44500_G1_I1" 1 313
scaffold1069_cov65	RepeatMasker	similarity	516091	516362	0.0	+	.	Target "Motif:NA_COMP11001_G1_I1" 1 272
scaffold1069_cov65	RepeatMasker	similarity	516402	516791	0.3	+	.	Target "Motif:NA_COMP39552_G1_I1" 1 390
scaffold1069_cov65	RepeatMasker	similarity	518342	518554	0.0	-	.	Target "Motif:NA_COMP36064_G1_I1" 1 213
scaffold1069_cov65	RepeatMasker	similarity	525312	525612	0.3	+	.	Target "Motif:NA_COMP39537_G1_I1" 1 301
scaffold1069_cov65	RepeatMasker	similarity	527426	527749	0.3	-	.	Target "Motif:NA_COMP6434_G1_I1" 1 324
scaffold1069_cov65	RepeatMasker	similarity	527818	528061	9.8	-	.	Target "Motif:OTHERS_COMP3572_G10_I3" 2 250
scaffold1069_cov65	RepeatMasker	similarity	532982	533437	0.0	-	.	Target "Motif:SIMPLE_REPEAT_COMP38159_G1_I1" 20 475
scaffold1069_cov65	RepeatMasker	similarity	534916	535294	0.3	-	.	Target "Motif:NA_COMP50849_G1_I1" 1 379
scaffold1069_cov65	RepeatMasker	similarity	540782	541244	0.0	-	.	Target "Motif:NA_COMP32041_G1_I1" 1 463
scaffold1069_cov65	RepeatMasker	similarity	547465	547669	9.8	-	.	Target "Motif:NA_COMP3382_G2_I3" 17 224
scaffold1069_cov65	RepeatMasker	similarity	550883	551214	0.0	+	.	Target "Motif:SIMPLE_REPEAT_COMP14744_G1_I1" 1 332
scaffold1069_cov65	RepeatMasker	similarity	553101	553337	8.9	+	.	Target "Motif:OTHERS_COMP3572_G10_I3" 5 245
scaffold1069_cov65	RepeatMasker	similarity	555390	555657	0.8	-	.	Target "Motif:NA_COMP35669_G1_I1" 1 268
scaffold1069_cov65	RepeatMasker	similarity	557456	557742	0.3	+	.	Target "Motif:NA_COMP30629_G1_I1" 1 287
scaffold1069_cov65	RepeatMasker	similarity	561268	561528	0.0	-	.	Target "Motif:SIMPLE_REPEAT_COMP17472_G1_I1" 1 261
scaffold1069_cov65	RepeatMasker	similarity	562586	562797	1.4	+	.	Target "Motif:SIMPLE_REPEAT_COMP30707_G1_I1" 1 210
scaffold1069_cov65	RepeatMasker	similarity	568500	568788	0.0	+	.	Target "Motif:NA_COMP46534_G1_I1" 2 290
scaffold1069_cov65	RepeatMasker	similarity	586542	586991	0.0	+	.	Target "Motif:LTR_COMP35195_G1_I1" 1 450
scaffold1069_cov65	RepeatMasker	similarity	590646	590845	0.0	-	.	Target "Motif:SIMPLE_REPEAT_COMP20164_G1_I1" 1 200
scaffold1069_cov65	RepeatMasker	similarity	592526	592694	6.8	-	.	Target "Motif:NA_COMP3448_G19_I1" 145 321
scaffold1069_cov65	RepeatMasker	similarity	593413	593577	6.7	+	.	Target "Motif:NA_COMP3557_G7_I3" 116 280
scaffold1069_cov65	RepeatMasker	similarity	604447	604809	0.0	+	.	Target "Motif:NA_COMP3540_G2_I1" 1 363
scaffold1069_cov65	RepeatMasker	similarity	605103	605577	3.0	-	.	Target "Motif:NA_COMP3490_G3_I3" 1 475
scaffold1069_cov65	RepeatMasker	similarity	605855	606160	0.0	+	.	Target "Motif:NA_COMP22179_G1_I1" 1 306
scaffold1069_cov65	RepeatMasker	similarity	608442	608689	8.1	+	.	Target "Motif:OTHERS_COMP3572_G10_I3" 4 251
scaffold1069_cov65	RepeatMasker	similarity	609482	609724	5.3	+	.	Target "Motif:NA_COMP3557_G7_I3" 38 280
scaffold1069_cov65	RepeatMasker	similarity	620978	621168	7.3	+	.	Target "Motif:NA_COMP3445_G3_I1" 1 228
scaffold1069_cov65	RepeatMasker	similarity	629023	629557	0.2	+	.	Target "Motif:NA_COMP11731_G1_I1" 1 535
scaffold1069_cov65	RepeatMasker	similarity	629649	630199	0.0	-	.	Target "Motif:SIMPLE_REPEAT_COMP12626_G1_I1" 1 551
scaffold1069_cov65	RepeatMasker	similarity	637718	638126	0.0	+	.	Target "Motif:NA_COMP10095_G1_I1" 1 409
scaffold1069_cov65	RepeatMasker	similarity	646936	647430	0.6	+	.	Target "Motif:NA_COMP960_G1_I1" 1 495
scaffold1069_cov65	RepeatMasker	similarity	652131	652278	9.8	+	.	Target "Motif:NA_COMP42477_G1_I1" 1 146
scaffold1069_cov65	RepeatMasker	similarity	657479	657607	3.1	-	.	Target "Motif:LOW_COMPLEXITY_COMP46093_G1_I1" 125 253
scaffold1069_cov65	RepeatMasker	similarity	662777	663188	0.0	-	.	Target "Motif:NA_COMP20297_G1_I1" 1 412
scaffold1069_cov65	RepeatMasker	similarity	664001	664256	0.8	-	.	Target "Motif:NA_COMP49980_G1_I1" 1 256
scaffold1069_cov65	RepeatMasker	similarity	664377	664549	8.7	-	.	Target "Motif:NA_COMP3525_G3_I1" 192 368
scaffold1069_cov65	RepeatMasker	similarity	666099	666707	0.2	+	.	Target "Motif:NA_COMP14170_G1_I1" 1 609
scaffold1069_cov65	RepeatMasker	similarity	671905	672143	0.0	-	.	Target "Motif:NA_COMP42415_G1_I1" 18 256
scaffold1069_cov65	RepeatMasker	similarity	676620	677098	0.0	+	.	Target "Motif:LINE_COMP18776_G1_I1" 1 479
scaffold1069_cov65	RepeatMasker	similarity	692891	693132	5.0	+	.	Target "Motif:NA_COMP3595_G5_I3" 209 452
scaffold1069_cov65	RepeatMasker	similarity	695428	695763	0.0	+	.	Target "Motif:NA_COMP4973_G1_I1" 1 336
scaffold1069_cov65	RepeatMasker	similarity	699908	700141	8.2	+	.	Target "Motif:NA_COMP3595_G5_I3" 207 416
scaffold1069_cov65	RepeatMasker	similarity	700282	700721	0.0	-	.	Target "Motif:NA_COMP21169_G1_I1" 1 440
scaffold1069_cov65	RepeatMasker	similarity	701969	702157	3.2	-	.	Target "Motif:NA_COMP3443_G7_I1" 53 241
scaffold1069_cov65	RepeatMasker	similarity	702137	702599	0.0	-	.	Target "Motif:NA_COMP16441_G1_I1" 1 463
scaffold1069_cov65	RepeatMasker	similarity	702650	703033	0.0	-	.	Target "Motif:NA_COMP44607_G1_I1" 1 384
scaffold1069_cov65	RepeatMasker	similarity	703077	703202	7.1	-	.	Target "Motif:NA_COMP3584_G1_I9" 4 129
scaffold1069_cov65	RepeatMasker	similarity	703147	703635	0.6	-	.	Target "Motif:NA_COMP15287_G1_I1" 1 489
scaffold1069_cov65	RepeatMasker	similarity	704145	704529	9.7	-	.	Target "Motif:NA_COMP3438_G15_I3" 1 383
scaffold1069_cov65	RepeatMasker	similarity	704679	705022	0.3	-	.	Target "Motif:NA_COMP17075_G1_I1" 1 344
scaffold1069_cov65	RepeatMasker	similarity	705513	705781	7.8	+	.	Target "Motif:OTHERS_COMP2239_G1_I1" 3 290
scaffold1069_cov65	RepeatMasker	similarity	706052	706302	5.6	-	.	Target "Motif:NA_COMP3507_G2_I1" 148 396
scaffold1069_cov65	RepeatMasker	similarity	718891	719841	0.0	+	.	Target "Motif:NA_COMP22213_G1_I1" 1 951
scaffold1069_cov65	RepeatMasker	similarity	721312	721586	0.4	-	.	Target "Motif:NA_COMP32511_G1_I1" 2 276
scaffold1069_cov65	RepeatMasker	similarity	723264	723463	9.0	+	.	Target "Motif:NA_COMP829_G1_I2" 266 490
scaffold1069_cov65	RepeatMasker	similarity	726302	726353	1.9	-	.	Target "Motif:NA_COMP3440_G3_I1" 199 250
scaffold1069_cov65	RepeatMasker	similarity	726351	726527	4.0	+	.	Target "Motif:NA_COMP3458_G7_I1" 1 183
scaffold1069_cov65	RepeatMasker	similarity	726417	726541	6.4	+	.	Target "Motif:NA_COMP3458_G3_I3" 30 160
scaffold1069_cov65	RepeatMasker	similarity	726538	726731	7.3	-	.	Target "Motif:NA_COMP3440_G3_I1" 11 202
scaffold1069_cov65	RepeatMasker	similarity	726726	726909	6.0	-	.	Target "Motif:OTHERS_COMP3572_G10_I6" 34 224
scaffold1069_cov65	RepeatMasker	similarity	729485	730007	0.0	+	.	Target "Motif:NA_COMP22614_G1_I1" 1 523
scaffold1069_cov65	RepeatMasker	similarity	735076	735199	9.8	-	.	Target "Motif:NA_COMP3468_G5_I2" 48 169
scaffold1069_cov65	RepeatMasker	similarity	735238	735409	0.0	-	.	Target "Motif:NA_COMP12963_G1_I1" 1 172
scaffold1069_cov65	RepeatMasker	similarity	740853	741050	9.2	+	.	Target "Motif:NA_COMP3501_G12_I3" 47 245
scaffold1069_cov65	RepeatMasker	similarity	746302	746553	6.0	+	.	Target "Motif:SIMPLE_REPEAT_COMP3588_G5_I5" 97 343
scaffold1069_cov65	RepeatMasker	similarity	752083	752495	0.2	+	.	Target "Motif:NA_COMP29083_G1_I1" 1 413
scaffold1069_cov65	RepeatMasker	similarity	757838	758107	0.0	-	.	Target "Motif:NA_COMP49466_G1_I1" 1 270
scaffold1069_cov65	RepeatMasker	similarity	759750	759968	3.6	-	.	Target "Motif:OTHERS_COMP3540_G9_I2" 202 442
scaffold1069_cov65	RepeatMasker	similarity	761512	761821	0.0	-	.	Target "Motif:NA_COMP30412_G1_I1" 1 310
scaffold1069_cov65	RepeatMasker	similarity	770719	770800	9.8	-	.	Target "Motif:NA_COMP3595_G5_I3" 363 447
scaffold1069_cov65	RepeatMasker	similarity	771033	771385	4.4	-	.	Target "Motif:NA_COMP3219_G2_I1" 1 344
scaffold1069_cov65	RepeatMasker	similarity	772256	772314	3.4	-	.	Target "Motif:NA_COMP3440_G3_I1" 190 248
scaffold1069_cov65	RepeatMasker	similarity	772554	772739	8.2	-	.	Target "Motif:NA_COMP3440_G3_I1" 11 193
scaffold1069_cov65	RepeatMasker	similarity	772651	773220	7.7	+	.	Target "Motif:NA_COMP3196_G1_I2" 1 564
scaffold1069_cov65	RepeatMasker	similarity	773307	773566	0.0	-	.	Target "Motif:NA_COMP19500_G1_I1" 1 260
scaffold1069_cov65	RepeatMasker	similarity	783639	783892	1.2	+	.	Target "Motif:NA_COMP45122_G1_I1" 3 256
scaffold1069_cov65	RepeatMasker	similarity	783893	783946	7.4	+	.	Target "Motif:OTHERS_COMP3518_G4_I3" 13 66
scaffold1069_cov65	RepeatMasker	similarity	783919	784104	7.0	-	.	Target "Motif:NA_COMP3210_G2_I1" 1 221
scaffold1069_cov65	RepeatMasker	similarity	784010	784214	5.9	+	.	Target "Motif:OTHERS_COMP3518_G4_I2" 156 359
scaffold1069_cov65	RepeatMasker	similarity	784182	784528	4.3	+	.	Target "Motif:NA_COMP3518_G5_I1" 2 358
scaffold1069_cov65	RepeatMasker	similarity	785202	785356	9.7	+	.	Target "Motif:NA_COMP2981_G1_I1" 21 175
scaffold1069_cov65	RepeatMasker	similarity	789207	789498	1.0	-	.	Target "Motif:NA_COMP26646_G1_I1" 1 292
scaffold1069_cov65	RepeatMasker	similarity	790473	790827	0.6	+	.	Target "Motif:NA_COMP3392_G4_I2" 36 391
scaffold1069_cov65	RepeatMasker	similarity	791391	791568	7.9	+	.	Target "Motif:NA_COMP3545_G3_I1" 59 238
scaffold1069_cov65	RepeatMasker	similarity	793051	793232	8.4	+	.	Target "Motif:NA_COMP3588_G5_I2" 49 228
scaffold1069_cov65	RepeatMasker	similarity	793068	793299	8.8	+	.	Target "Motif:SIMPLE_REPEAT_COMP3588_G5_I5" 97 343
scaffold1069_cov65	RepeatMasker	similarity	793957	794272	7.3	+	.	Target "Motif:NA_COMP3554_G1_I6" 1 325
scaffold1069_cov65	RepeatMasker	similarity	795840	796098	0.0	+	.	Target "Motif:NA_COMP18307_G1_I1" 3 261
scaffold1069_cov65	RepeatMasker	similarity	797717	798007	1.4	-	.	Target "Motif:NA_COMP45937_G1_I1" 1 291
scaffold1069_cov65	RepeatMasker	similarity	798755	799051	0.0	+	.	Target "Motif:NA_COMP40006_G1_I1" 14 310
scaffold1069_cov65	RepeatMasker	similarity	800017	800221	6.0	-	.	Target "Motif:NA_COMP3507_G8_I3" 25 224
scaffold1069_cov65	RepeatMasker	similarity	800595	800881	0.7	-	.	Target "Motif:NA_COMP40089_G1_I1" 1 287
scaffold1069_cov65	RepeatMasker	similarity	801934	802239	0.0	-	.	Target "Motif:SIMPLE_REPEAT_COMP40029_G1_I1" 1 306
scaffold1069_cov65	RepeatMasker	similarity	803009	803231	4.9	-	.	Target "Motif:OTHERS_COMP3465_G26_I1" 118 342
scaffold1069_cov65	RepeatMasker	similarity	803236	803516	1.4	+	.	Target "Motif:OTHERS_COMP20449_G1_I1" 1 281
scaffold1069_cov65	RepeatMasker	similarity	807755	808037	0.7	+	.	Target "Motif:NA_COMP9322_G1_I1" 1 283
scaffold1069_cov65	RepeatMasker	similarity	823210	823396	9.7	-	.	Target "Motif:NA_COMP3526_G22_I1" 1 185
scaffold1069_cov65	RepeatMasker	similarity	826928	827184	6.0	+	.	Target "Motif:NA_COMP3441_G1_I8" 1 260
scaffold1069_cov65	RepeatMasker	similarity	827237	827413	5.7	+	.	Target "Motif:NA_COMP3498_G12_I1" 430 606
scaffold1069_cov65	RepeatMasker	similarity	828300	828563	0.0	+	.	Target "Motif:NA_COMP44570_G1_I1" 1 264
scaffold1069_cov65	RepeatMasker	similarity	828892	829324	0.0	-	.	Target "Motif:OTHERS_COMP23277_G1_I1" 1 433
scaffold1069_cov65	RepeatMasker	similarity	833616	833854	2.6	+	.	Target "Motif:NA_COMP3507_G8_I3" 26 258
scaffold1069_cov65	RepeatMasker	similarity	834137	834286	6.0	+	.	Target "Motif:NA_COMP3530_G5_I3" 121 270
scaffold1069_cov65	RepeatMasker	similarity	834342	834506	8.5	+	.	Target "Motif:NA_COMP3577_G3_I4" 72 236
scaffold1069_cov65	RepeatMasker	similarity	836730	837189	0.0	+	.	Target "Motif:NA_COMP33440_G1_I1" 1 460
scaffold1069_cov65	RepeatMasker	similarity	839081	839475	0.0	-	.	Target "Motif:NA_COMP44611_G1_I1" 1 395
scaffold1069_cov65	RepeatMasker	similarity	841598	841766	7.8	-	.	Target "Motif:NA_COMP3339_G2_I1" 614 780
scaffold1069_cov65	RepeatMasker	similarity	842738	842969	6.5	+	.	Target "Motif:NA_COMP3422_G4_I1" 100 331
scaffold1069_cov65	RepeatMasker	similarity	842903	843103	5.5	+	.	Target "Motif:NA_COMP3422_G2_I1" 173 373
scaffold1069_cov65	RepeatMasker	similarity	844294	844607	2.5	+	.	Target "Motif:NA_COMP3284_G1_I2" 600 979
scaffold1069_cov65	RepeatMasker	similarity	844833	845168	8.4	-	.	Target "Motif:SIMPLE_REPEAT_COMP3340_G1_I1" 7 339
scaffold1069_cov65	RepeatMasker	similarity	845031	845246	9.3	-	.	Target "Motif:NA_COMP3340_G2_I1" 137 351
scaffold1069_cov65	RepeatMasker	similarity	845219	845485	2.2	+	.	Target "Motif:OTHERS_COMP37439_G1_I1" 1 267
scaffold1069_cov65	RepeatMasker	similarity	845738	845916	5.6	-	.	Target "Motif:NA_COMP3438_G15_I2" 187 365
scaffold1069_cov65	RepeatMasker	similarity	846364	846784	4.5	-	.	Target "Motif:NA_COMP2763_G2_I1" 1 403
scaffold1069_cov65	RepeatMasker	similarity	847441	847699	0.0	+	.	Target "Motif:NA_COMP8005_G1_I1" 1 259
scaffold1069_cov65	RepeatMasker	similarity	849445	849706	8.0	-	.	Target "Motif:NA_COMP3590_G9_I1" 1 252
scaffold1069_cov65	RepeatMasker	similarity	849595	849785	9.9	-	.	Target "Motif:NA_COMP3554_G6_I1" 17 208
scaffold1069_cov65	RepeatMasker	similarity	852495	852850	1.1	+	.	Target "Motif:NA_COMP3559_G5_I1" 1 356
scaffold1069_cov65	RepeatMasker	similarity	853091	853206	7.9	+	.	Target "Motif:NA_COMP2763_G2_I2" 1 104
scaffold1069_cov65	RepeatMasker	similarity	855141	855369	5.3	+	.	Target "Motif:NA_COMP3440_G3_I1" 13 249
scaffold1069_cov65	RepeatMasker	similarity	856228	856548	0.0	-	.	Target "Motif:NA_COMP22551_G1_I1" 1 321
scaffold1069_cov65	RepeatMasker	similarity	860872	861086	3.7	+	.	Target "Motif:LTR_COMP3549_G16_I1" 169 383
scaffold1069_cov65	RepeatMasker	similarity	864708	864945	3.5	-	.	Target "Motif:NA_COMP3507_G8_I3" 26 258
scaffold1069_cov65	RepeatMasker	similarity	871916	871973	7.3	-	.	Target "Motif:NA_COMP3443_G7_I6" 5 59
scaffold1069_cov65	RepeatMasker	similarity	877322	877509	9.3	-	.	Target "Motif:OTHERS_COMP3083_G3_I1" 41 223
scaffold1069_cov65	RepeatMasker	similarity	878928	879188	8.1	+	.	Target "Motif:NA_COMP3510_G5_I10" 26 286
scaffold1069_cov65	RepeatMasker	similarity	880230	880486	6.4	+	.	Target "Motif:NA_COMP3507_G2_I1" 148 398
scaffold1069_cov65	RepeatMasker	similarity	881790	881984	8.2	+	.	Target "Motif:NA_COMP3604_G3_I2" 1 199
scaffold1069_cov65	RepeatMasker	similarity	883439	883826	0.0	-	.	Target "Motif:NA_COMP13803_G1_I1" 1 388
scaffold1069_cov65	RepeatMasker	similarity	884220	884696	7.1	+	.	Target "Motif:SIMPLE_REPEAT_COMP3532_G2_I3" 2 478
scaffold1069_cov65	RepeatMasker	similarity	888124	888321	8.6	-	.	Target "Motif:NA_COMP3443_G11_I1" 75 272
scaffold1069_cov65	RepeatMasker	similarity	888481	888808	5.8	-	.	Target "Motif:NA_COMP3498_G12_I1" 88 433
scaffold1069_cov65	RepeatMasker	similarity	888779	889044	6.1	-	.	Target "Motif:NA_COMP3507_G2_I1" 145 407
scaffold1069_cov65	RepeatMasker	similarity	891593	891821	3.1	-	.	Target "Motif:NA_COMP3545_G15_I1" 1 230
scaffold1069_cov65	RepeatMasker	similarity	893520	893766	8.3	+	.	Target "Motif:LOW_COMPLEXITY_COMP3545_G7_I1" 127 366
scaffold1069_cov65	RepeatMasker	similarity	893678	893785	8.3	+	.	Target "Motif:NA_COMP3545_G15_I1" 1 111
scaffold1069_cov65	RepeatMasker	similarity	895395	895541	9.6	-	.	Target "Motif:NA_COMP3289_G8_I1" 57 203
scaffold1069_cov65	RepeatMasker	similarity	895447	895852	8.9	-	.	Target "Motif:SIMPLE_REPEAT_COMP3532_G2_I1" 1 462
scaffold1069_cov65	RepeatMasker	similarity	898215	898444	0.0	+	.	Target "Motif:NA_COMP44722_G1_I1" 1 230
scaffold1069_cov65	RepeatMasker	similarity	898761	899006	6.2	-	.	Target "Motif:NA_COMP3440_G3_I1" 13 255
scaffold1069_cov65	RepeatMasker	similarity	902484	902645	5.6	-	.	Target "Motif:NA_COMP3402_G5_I2" 180 341
scaffold1069_cov65	RepeatMasker	similarity	903722	904013	0.3	+	.	Target "Motif:NA_COMP23096_G1_I1" 1 292
scaffold1069_cov65	RepeatMasker	similarity	905064	905451	0.5	+	.	Target "Motif:OTHERS_COMP3465_G26_I1" 2 389
scaffold1069_cov65	RepeatMasker	similarity	906935	907155	0.0	-	.	Target "Motif:NA_COMP3550_G11_I1" 1 221
scaffold1069_cov65	RepeatMasker	similarity	907119	907305	8.8	+	.	Target "Motif:LTR_COMP3490_G11_I1" 43 225
scaffold1069_cov65	RepeatMasker	similarity	907709	907966	6.0	-	.	Target "Motif:NA_COMP3507_G8_I3" 10 258
scaffold1069_cov65	RepeatMasker	similarity	907944	908525	0.0	-	.	Target "Motif:NA_COMP3945_G1_I1" 1 582
scaffold1069_cov65	RepeatMasker	similarity	909127	909323	8.6	-	.	Target "Motif:NA_COMP3443_G11_I1" 75 271
scaffold1069_cov65	RepeatMasker	similarity	909483	909841	4.5	-	.	Target "Motif:NA_COMP3498_G12_I1" 65 433
scaffold1069_cov65	RepeatMasker	similarity	912096	912281	8.2	+	.	Target "Motif:NA_COMP2527_G1_I2" 1 183
scaffold1069_cov65	RepeatMasker	similarity	915830	916077	7.3	+	.	Target "Motif:NA_COMP3204_G1_I3" 21 268
scaffold1069_cov65	RepeatMasker	similarity	920095	920392	0.0	+	.	Target "Motif:NA_COMP34104_G1_I1" 1 298
scaffold1069_cov65	RepeatMasker	similarity	927534	927938	0.5	-	.	Target "Motif:NA_COMP9552_G1_I1" 1 405
scaffold1069_cov65	RepeatMasker	similarity	933989	934455	0.0	+	.	Target "Motif:NA_COMP28860_G1_I1" 1 467
scaffold1069_cov65	RepeatMasker	similarity	934587	934830	0.0	+	.	Target "Motif:NA_COMP50647_G1_I1" 32 275
scaffold1069_cov65	RepeatMasker	similarity	937978	938392	0.0	-	.	Target "Motif:NA_COMP8702_G1_I1" 1 415
scaffold1069_cov65	RepeatMasker	similarity	944100	944376	0.4	-	.	Target "Motif:NA_COMP5727_G1_I1" 1 277
scaffold1069_cov65	RepeatMasker	similarity	953204	953599	0.0	+	.	Target "Motif:NA_COMP34236_G1_I1" 1 396
scaffold1069_cov65	RepeatMasker	similarity	956435	956711	0.0	-	.	Target "Motif:LTR_COMP18464_G1_I1" 1 277
scaffold1069_cov65	RepeatMasker	similarity	964803	964974	8.7	-	.	Target "Motif:NA_COMP3556_G5_I1" 90 261
scaffold1069_cov65	RepeatMasker	similarity	967156	967391	7.6	+	.	Target "Motif:NA_COMP3441_G1_I8" 1 237
scaffold1069_cov65	RepeatMasker	similarity	968472	968776	0.0	-	.	Target "Motif:NA_COMP3712_G1_I1" 1 305
scaffold1069_cov65	RepeatMasker	similarity	969115	969529	0.2	-	.	Target "Motif:NA_COMP21114_G1_I1" 1 415
scaffold1069_cov65	RepeatMasker	similarity	971314	971559	6.9	+	.	Target "Motif:NA_COMP3557_G7_I3" 35 280
scaffold1069_cov65	RepeatMasker	similarity	973901	974101	0.0	-	.	Target "Motif:NA_COMP3439_G4_I1" 1 201
scaffold1069_cov65	RepeatMasker	similarity	975915	976122	0.0	-	.	Target "Motif:NA_COMP43146_G1_I1" 1 208
scaffold1069_cov65	RepeatMasker	similarity	979492	979628	8.9	-	.	Target "Motif:NA_COMP1336_G1_I1" 1 135
scaffold1069_cov65	RepeatMasker	similarity	980551	980931	0.5	-	.	Target "Motif:NA_COMP8242_G1_I1" 1 381
scaffold1069_cov65	RepeatMasker	similarity	991957	992104	7.4	-	.	Target "Motif:NA_COMP3599_G12_I2" 112 259
scaffold1069_cov65	RepeatMasker	similarity	992813	993064	4.8	-	.	Target "Motif:NA_COMP3507_G2_I1" 147 396
scaffold1069_cov65	RepeatMasker	similarity	994616	994829	6.1	-	.	Target "Motif:NA_COMP3584_G1_I3" 3 216
scaffold1069_cov65	RepeatMasker	similarity	994870	995355	3.3	-	.	Target "Motif:NA_COMP3584_G8_I1" 41 526
scaffold1069_cov65	RepeatMasker	similarity	997698	998152	0.0	-	.	Target "Motif:NA_COMP10389_G1_I1" 1 455
scaffold1069_cov65	RepeatMasker	similarity	999405	999463	1.7	-	.	Target "Motif:NA_COMP3468_G1_I1" 183 241
scaffold1069_cov65	RepeatMasker	similarity	999461	999534	8.1	-	.	Target "Motif:NA_COMP3468_G1_I1" 1 74
scaffold1069_cov65	RepeatMasker	similarity	999515	999728	0.0	+	.	Target "Motif:NA_COMP46280_G1_I1" 1 214
scaffold1069_cov65	RepeatMasker	similarity	1002074	1002194	5.8	+	.	Target "Motif:NA_COMP3402_G5_I3" 106 226
scaffold1069_cov65	RepeatMasker	similarity	1005164	1005347	8.7	-	.	Target "Motif:LOW_COMPLEXITY_COMP3545_G7_I1" 127 310
scaffold1069_cov65	RepeatMasker	similarity	1008329	1008554	8.4	-	.	Target "Motif:NA_COMP3579_G8_I1" 2 227
scaffold1069_cov65	RepeatMasker	similarity	1011020	1011196	5.7	-	.	Target "Motif:NA_COMP3438_G15_I2" 189 365
scaffold1069_cov65	RepeatMasker	similarity	1014765	1014981	0.5	+	.	Target "Motif:LTR_COMP49479_G1_I1" 1 217
scaffold1069_cov65	RepeatMasker	similarity	1026735	1026956	6.8	+	.	Target "Motif:LTR_COMP3549_G16_I1" 161 383
scaffold1069_cov65	RepeatMasker	similarity	1027797	1028121	0.0	-	.	Target "Motif:NA_COMP36489_G1_I1" 1 325
scaffold1069_cov65	RepeatMasker	similarity	1030401	1030842	0.0	-	.	Target "Motif:NA_COMP13720_G1_I1" 1 442
scaffold1069_cov65	RepeatMasker	similarity	1033934	1034141	4.4	-	.	Target "Motif:NA_COMP3563_G9_I1" 42 247
scaffold1069_cov65	RepeatMasker	similarity	1034883	1035174	0.0	+	.	Target "Motif:NA_COMP2583_G2_I1" 1 292
scaffold1069_cov65	RepeatMasker	similarity	1035964	1036171	6.7	-	.	Target "Motif:NA_COMP3498_G12_I1" 429 636
scaffold1069_cov65	RepeatMasker	similarity	1040020	1040362	5.3	+	.	Target "Motif:NA_COMP34164_G1_I1" 163 505
scaffold1069_cov65	RepeatMasker	similarity	1045872	1046180	0.7	+	.	Target "Motif:NA_COMP6954_G1_I1" 1 309
scaffold1069_cov65	RepeatMasker	similarity	1050367	1050540	7.5	+	.	Target "Motif:NA_COMP3463_G4_I2" 1 174
scaffold1069_cov65	RepeatMasker	similarity	1054737	1055358	0.0	+	.	Target "Motif:LTR_COMP708_G1_I2" 1 621
scaffold1069_cov65	RepeatMasker	similarity	1058672	1058803	6.8	-	.	Target "Motif:NA_COMP3559_G4_I1" 88 219
scaffold1069_cov65	RepeatMasker	similarity	1078741	1079071	1.5	-	.	Target "Motif:OTHERS_COMP30332_G1_I1" 1 331
scaffold1069_cov65	RepeatMasker	similarity	1081893	1082120	5.4	-	.	Target "Motif:NA_COMP3410_G11_I1" 1 224
scaffold1069_cov65	RepeatMasker	similarity	1085801	1086195	0.2	-	.	Target "Motif:NA_COMP36599_G1_I1" 1 395
scaffold1069_cov65	RepeatMasker	similarity	1086433	1086637	0.0	-	.	Target "Motif:NA_COMP3280_G1_I1" 1 205
scaffold1069_cov65	RepeatMasker	similarity	1087877	1088055	5.1	+	.	Target "Motif:NA_COMP3350_G2_I3" 188 363
scaffold1069_cov65	RepeatMasker	similarity	1088525	1088775	0.4	-	.	Target "Motif:NA_COMP14264_G1_I1" 1 251
scaffold1069_cov65	RepeatMasker	similarity	1091952	1092082	1.6	-	.	Target "Motif:NA_COMP3443_G15_I1" 1 128
scaffold1069_cov65	RepeatMasker	similarity	1094288	1094853	0.0	+	.	Target "Motif:NA_COMP17514_G1_I1" 1 566
scaffold1069_cov65	RepeatMasker	similarity	1102428	1102659	1.3	-	.	Target "Motif:NA_COMP14288_G1_I1" 74 306
scaffold1069_cov65	RepeatMasker	similarity	1106376	1106752	0.5	+	.	Target "Motif:NA_COMP35381_G1_I1" 1 377
scaffold1069_cov65	RepeatMasker	similarity	1115399	1115705	0.0	+	.	Target "Motif:NA_COMP31805_G1_I1" 1 307
scaffold1069_cov65	RepeatMasker	similarity	1119604	1120105	2.2	+	.	Target "Motif:NA_COMP3461_G1_I1" 1 521
scaffold1069_cov65	RepeatMasker	similarity	1119981	1120244	6.6	+	.	Target "Motif:NA_COMP3461_G1_I2" 299 556
scaffold1069_cov65	RepeatMasker	similarity	1120489	1120609	3.3	+	.	Target "Motif:NA_COMP13179_G1_I1" 78 214
scaffold1069_cov65	RepeatMasker	similarity	1120545	1120865	5.4	+	.	Target "Motif:NA_COMP3501_G5_I2" 276 626
scaffold1069_cov65	RepeatMasker	similarity	1121944	1122242	7.2	-	.	Target "Motif:NA_COMP3518_G5_I1" 2 302
scaffold1069_cov65	RepeatMasker	similarity	1124756	1124953	8.1	-	.	Target "Motif:NA_COMP3550_G17_I1" 51 248
scaffold1069_cov65	RepeatMasker	similarity	1127541	1127846	0.0	+	.	Target "Motif:SIMPLE_REPEAT_COMP21305_G1_I1" 1 306
scaffold1069_cov65	RepeatMasker	similarity	1128047	1128191	9.0	-	.	Target "Motif:SIMPLE_REPEAT_COMP3177_G1_I1" 104 250
scaffold1069_cov65	RepeatMasker	similarity	1129280	1129476	8.6	-	.	Target "Motif:OTHERS_COMP3564_G4_I4" 333 533
scaffold1069_cov65	RepeatMasker	similarity	1130827	1130948	6.0	+	.	Target "Motif:OTHERS_COMP3350_G2_I1" 226 359
scaffold1069_cov65	RepeatMasker	similarity	1132844	1133019	4.8	+	.	Target "Motif:NA_COMP34428_G1_I1" 231 398
scaffold1069_cov65	RepeatMasker	similarity	1132964	1133185	6.8	-	.	Target "Motif:NA_COMP71_G1_I2" 1 221
scaffold1069_cov65	RepeatMasker	similarity	1134835	1135208	2.1	-	.	Target "Motif:NA_COMP3556_G1_I6" 245 618
scaffold1069_cov65	RepeatMasker	similarity	1135786	1135954	4.7	-	.	Target "Motif:NA_COMP3598_G4_I2" 266 436
scaffold1069_cov65	RepeatMasker	similarity	1136069	1136253	4.9	-	.	Target "Motif:NA_COMP3598_G3_I1" 309 494
scaffold1069_cov65	RepeatMasker	similarity	1138643	1139292	2.0	-	.	Target "Motif:NA_COMP18155_G1_I1" 1 650
scaffold1069_cov65	RepeatMasker	similarity	1139408	1139759	1.4	-	.	Target "Motif:OTHERS_COMP3491_G1_I3" 234 585
scaffold1069_cov65	RepeatMasker	similarity	1140430	1140508	2.5	-	.	Target "Motif:OTHERS_COMP15885_G1_I1" 179 257
scaffold1069_cov65	RepeatMasker	similarity	1140898	1140955	1.7	-	.	Target "Motif:OTHERS_COMP10805_G1_I1" 516 573
scaffold1069_cov65	RepeatMasker	similarity	1140959	1141406	1.6	-	.	Target "Motif:OTHERS_COMP10805_G1_I1" 1 448
scaffold1069_cov65	RepeatMasker	similarity	1141578	1141975	9.5	+	.	Target "Motif:NA_COMP2422_G1_I1" 662 1036
scaffold1069_cov65	RepeatMasker	similarity	1142757	1142829	1.4	-	.	Target "Motif:OTHERS_COMP3309_G1_I1" 1262 1334
scaffold1069_cov65	RepeatMasker	similarity	1144167	1144307	0.7	-	.	Target "Motif:OTHERS_COMP3309_G1_I1" 23 163
scaffold1069_cov65	RepeatMasker	similarity	1144315	1144549	2.1	-	.	Target "Motif:OTHERS_COMP3560_G2_I6" 192 431
scaffold1069_cov65	RepeatMasker	similarity	1144546	1144884	3.2	+	.	Target "Motif:OTHERS_COMP3523_G1_I1" 951 1289
scaffold1069_cov65	RepeatMasker	similarity	1144884	1145047	9.2	-	.	Target "Motif:OTHERS_COMP3564_G4_I4" 149 340
scaffold1069_cov65	RepeatMasker	similarity	1145047	1147020	4.6	-	.	Target "Motif:LTR_COMP3514_G6_I1" 1113 3087
scaffold1069_cov65	RepeatMasker	similarity	1147027	1147560	6.2	-	.	Target "Motif:LTR_COMP3514_G6_I1" 434 988
scaffold1069_cov65	RepeatMasker	similarity	1151777	1152059	0.0	-	.	Target "Motif:SIMPLE_REPEAT_COMP3672_G1_I1" 1 283
scaffold1069_cov65	RepeatMasker	similarity	1153613	1153984	0.5	-	.	Target "Motif:NA_COMP42553_G1_I1" 1 372
scaffold1069_cov65	RepeatMasker	similarity	1163805	1164048	1.2	-	.	Target "Motif:NA_COMP5794_G2_I1" 1 244
scaffold1069_cov65	RepeatMasker	similarity	1171854	1172223	0.0	-	.	Target "Motif:NA_COMP38328_G1_I1" 1 370
scaffold1069_cov65	RepeatMasker	similarity	1172827	1172931	9.5	-	.	Target "Motif:NA_COMP15921_G1_I1" 376 480
scaffold1069_cov65	RepeatMasker	similarity	1182134	1182454	0.6	+	.	Target "Motif:NA_COMP22478_G1_I1" 1 321
scaffold1069_cov65	RepeatMasker	similarity	1191800	1192251	0.2	+	.	Target "Motif:NA_COMP26239_G1_I1" 1 452
scaffold1069_cov65	RepeatMasker	similarity	1199534	1199962	0.0	-	.	Target "Motif:NA_COMP17556_G1_I1" 1 429
scaffold1069_cov65	RepeatMasker	similarity	1212222	1212527	0.7	+	.	Target "Motif:NA_COMP24747_G1_I1" 1 306
scaffold1069_cov65	RepeatMasker	similarity	1215580	1216349	0.0	-	.	Target "Motif:NA_COMP14535_G1_I1" 1 770
scaffold1069_cov65	RepeatMasker	similarity	1228435	1228808	0.3	-	.	Target "Motif:NA_COMP45376_G1_I1" 1 374
scaffold1069_cov65	RepeatMasker	similarity	1245065	1245431	0.0	+	.	Target "Motif:NA_COMP3547_G12_I1" 1 367
scaffold1069_cov65	RepeatMasker	similarity	1252830	1253060	9.3	-	.	Target "Motif:NA_COMP3593_G5_I2" 122 347
scaffold1069_cov65	RepeatMasker	similarity	1253225	1253670	0.2	+	.	Target "Motif:SIMPLE_REPEAT_COMP29591_G1_I1" 1 446
scaffold1069_cov65	RepeatMasker	similarity	1260780	1261054	0.0	+	.	Target "Motif:SIMPLE_REPEAT_COMP19364_G1_I1" 1 275
scaffold1069_cov65	RepeatMasker	similarity	1271285	1271539	0.0	+	.	Target "Motif:NA_COMP30676_G1_I1" 1 255
scaffold1069_cov65	RepeatMasker	similarity	1273417	1273673	0.4	+	.	Target "Motif:NA_COMP20834_G1_I1" 1 257
scaffold1069_cov65	RepeatMasker	similarity	1276837	1276999	7.9	+	.	Target "Motif:NA_COMP3422_G2_I4" 55 196
scaffold1069_cov65	RepeatMasker	similarity	1276837	1276964	6.2	+	.	Target "Motif:NA_COMP3422_G2_I3" 174 301
scaffold1069_cov65	RepeatMasker	similarity	1278859	1279353	0.0	+	.	Target "Motif:SIMPLE_REPEAT_COMP16770_G1_I1" 1 495
scaffold1069_cov65	RepeatMasker	similarity	1280749	1280996	2.4	-	.	Target "Motif:NA_COMP26160_G1_I1" 1 250
scaffold1069_cov65	RepeatMasker	similarity	1284121	1284428	0.0	+	.	Target "Motif:NA_COMP8785_G1_I1" 1 308
scaffold1069_cov65	RepeatMasker	similarity	1285160	1285444	1.1	+	.	Target "Motif:NA_COMP41801_G1_I1" 23 307
scaffold1069_cov65	RepeatMasker	similarity	1285758	1285975	8.7	-	.	Target "Motif:NA_COMP3472_G3_I1" 132 339
scaffold1069_cov65	RepeatMasker	similarity	1285812	1286017	6.7	-	.	Target "Motif:NA_COMP3472_G18_I1" 99 294
scaffold1069_cov65	RepeatMasker	similarity	1286124	1286391	6.8	-	.	Target "Motif:SIMPLE_REPEAT_COMP3588_G5_I5" 93 343
scaffold1069_cov65	RepeatMasker	similarity	1286630	1286878	7.8	+	.	Target "Motif:NA_COMP3595_G5_I3" 209 452
scaffold1069_cov65	RepeatMasker	similarity	1296282	1296534	6.7	+	.	Target "Motif:NA_COMP3583_G2_I4" 170 422
scaffold1069_cov65	RepeatMasker	similarity	1296932	1297381	0.0	+	.	Target "Motif:NA_COMP27822_G1_I1" 1 450
scaffold1069_cov65	RepeatMasker	similarity	1301885	1302171	5.2	-	.	Target "Motif:SIMPLE_REPEAT_COMP3532_G2_I3" 175 478
scaffold1069_cov65	RepeatMasker	similarity	1302018	1302378	10.0	-	.	Target "Motif:NA_COMP3532_G3_I1" 158 542
scaffold1069_cov65	RepeatMasker	similarity	1310370	1310679	0.0	+	.	Target "Motif:NA_COMP25316_G1_I1" 1 310
scaffold1069_cov65	RepeatMasker	similarity	1320752	1321338	0.0	-	.	Target "Motif:NA_COMP35012_G1_I1" 1 587
scaffold1069_cov65	RepeatMasker	similarity	1324213	1324781	0.2	-	.	Target "Motif:NA_COMP1069_G2_I1" 2 570
scaffold1069_cov65	RepeatMasker	similarity	1327059	1327353	0.0	+	.	Target "Motif:NA_COMP17597_G1_I1" 1 295
scaffold1069_cov65	RepeatMasker	similarity	1329317	1329569	0.0	+	.	Target "Motif:NA_COMP36862_G1_I1" 1 253
scaffold1069_cov65	RepeatMasker	similarity	1330405	1330773	0.0	-	.	Target "Motif:NA_COMP4204_G1_I1" 1 369
scaffold1069_cov65	RepeatMasker	similarity	1336690	1336898	0.0	-	.	Target "Motif:NA_COMP45657_G1_I1" 27 235
scaffold1069_cov65	RepeatMasker	similarity	1338682	1338926	8.6	+	.	Target "Motif:SIMPLE_REPEAT_COMP3588_G5_I5" 98 343
scaffold1069_cov65	RepeatMasker	similarity	1360276	1360547	0.0	+	.	Target "Motif:NA_COMP22045_G1_I1" 1 272
scaffold1069_cov65	RepeatMasker	similarity	1361692	1362128	0.0	+	.	Target "Motif:NA_COMP34907_G1_I1" 1 437
scaffold1069_cov65	RepeatMasker	similarity	1370719	1371142	0.2	+	.	Target "Motif:SIMPLE_REPEAT_COMP23705_G1_I1" 1 424
scaffold1069_cov65	RepeatMasker	similarity	1371405	1371784	0.8	+	.	Target "Motif:NA_COMP32696_G1_I1" 1 380
scaffold1069_cov65	RepeatMasker	similarity	1392977	1393267	0.0	+	.	Target "Motif:NA_COMP9663_G1_I1" 1 291
scaffold1069_cov65	RepeatMasker	similarity	1394611	1394880	0.0	+	.	Target "Motif:NA_COMP17316_G1_I1" 1 270
scaffold1069_cov65	RepeatMasker	similarity	1397541	1397753	0.0	+	.	Target "Motif:NA_COMP43741_G1_I1" 1 213
scaffold1069_cov65	RepeatMasker	similarity	1399531	1399842	0.3	-	.	Target "Motif:NA_COMP33363_G1_I1" 1 312
scaffold1069_cov65	RepeatMasker	similarity	1401904	1402401	0.8	-	.	Target "Motif:NA_COMP2643_G2_I1" 1 498
scaffold1069_cov65	RepeatMasker	similarity	1409621	1409886	4.9	+	.	Target "Motif:NA_COMP3472_G1_I1" 57 322
scaffold1069_cov65	RepeatMasker	similarity	1409868	1410160	2.4	+	.	Target "Motif:NA_COMP37148_G1_I1" 1 295
scaffold1069_cov65	RepeatMasker	similarity	1415302	1415565	0.0	-	.	Target "Motif:NA_COMP34258_G1_I1" 1 264
scaffold1069_cov65	RepeatMasker	similarity	1424242	1424359	5.9	-	.	Target "Motif:NA_COMP29201_G1_I1" 91 208
scaffold1069_cov65	RepeatMasker	similarity	1427313	1427537	0.0	+	.	Target "Motif:SIMPLE_REPEAT_COMP14897_G1_I1" 1 225
scaffold1069_cov65	RepeatMasker	similarity	1433941	1434169	8.4	+	.	Target "Motif:NA_COMP3445_G3_I1" 2 227
scaffold1069_cov65	RepeatMasker	similarity	1435656	1436177	0.8	-	.	Target "Motif:SIMPLE_REPEAT_COMP4590_G1_I1" 2 523
scaffold1069_cov65	RepeatMasker	similarity	1437438	1437639	9.1	+	.	Target "Motif:NA_COMP3240_G1_I1" 58 254
scaffold1069_cov65	RepeatMasker	similarity	1437556	1437752	7.1	+	.	Target "Motif:NA_COMP3606_G15_I5" 1 197
scaffold1069_cov65	RepeatMasker	similarity	1437771	1437852	9.8	+	.	Target "Motif:NA_COMP3601_G11_I8" 169 253
scaffold1069_cov65	RepeatMasker	similarity	1444566	1444792	3.1	-	.	Target "Motif:NA_COMP3543_G18_I2" 122 357
scaffold1069_cov65	RepeatMasker	similarity	1444788	1445059	1.8	-	.	Target "Motif:NA_COMP3391_G4_I2" 1 272
scaffold1069_cov65	RepeatMasker	similarity	1450021	1450160	7.9	+	.	Target "Motif:NA_COMP26230_G1_I1" 154 297
scaffold1069_cov65	RepeatMasker	similarity	1455933	1456200	1.5	+	.	Target "Motif:NA_COMP41310_G1_I1" 5 271
scaffold1069_cov65	RepeatMasker	similarity	1462212	1462470	1.2	-	.	Target "Motif:NA_COMP44392_G1_I1" 1 259
scaffold1069_cov65	RepeatMasker	similarity	1466978	1467328	1.1	-	.	Target "Motif:OTHERS_COMP1013_G1_I1" 1 351
scaffold1069_cov65	RepeatMasker	similarity	1471213	1471488	1.8	+	.	Target "Motif:NA_COMP22176_G1_I1" 1 273
scaffold1069_cov65	RepeatMasker	similarity	1472788	1473026	7.5	-	.	Target "Motif:NA_COMP3463_G1_I7" 372 593
scaffold1069_cov65	RepeatMasker	similarity	1477661	1477884	0.9	+	.	Target "Motif:NA_COMP42063_G1_I1" 1 224
scaffold1069_cov65	RepeatMasker	similarity	1479130	1479509	0.3	+	.	Target "Motif:NA_COMP15045_G1_I1" 1 380
scaffold1069_cov65	RepeatMasker	similarity	1482583	1482856	0.0	-	.	Target "Motif:NA_COMP31507_G1_I1" 1 274
scaffold1069_cov65	RepeatMasker	similarity	1486131	1486428	0.0	-	.	Target "Motif:NA_COMP7176_G1_I1" 1 298
scaffold1069_cov65	RepeatMasker	similarity	1486467	1486697	7.6	+	.	Target "Motif:NA_COMP3593_G5_I2" 122 347
scaffold1069_cov65	RepeatMasker	similarity	1493470	1493683	0.5	-	.	Target "Motif:NA_COMP48081_G1_I1" 1 214
scaffold1069_cov65	RepeatMasker	similarity	1493914	1494409	0.0	-	.	Target "Motif:NA_COMP8499_G1_I1" 19 514
scaffold1069_cov65	RepeatMasker	similarity	1517541	1517736	0.5	-	.	Target "Motif:NA_COMP25433_G1_I1" 1 196
scaffold1069_cov65	RepeatMasker	similarity	1518460	1518791	0.0	-	.	Target "Motif:NA_COMP24597_G1_I1" 1 332
scaffold1069_cov65	RepeatMasker	similarity	1522718	1523031	0.0	-	.	Target "Motif:NA_COMP25976_G1_I1" 3 316
scaffold1069_cov65	RepeatMasker	similarity	1528441	1528645	0.0	+	.	Target "Motif:SIMPLE_REPEAT_COMP9143_G1_I1" 1 205
scaffold1069_cov65	RepeatMasker	similarity	1531362	1531572	5.2	-	.	Target "Motif:NA_COMP722_G1_I1" 395 605
scaffold1069_cov65	RepeatMasker	similarity	1533736	1534041	0.0	-	.	Target "Motif:NA_COMP40288_G1_I1" 1 306
scaffold1069_cov65	RepeatMasker	similarity	1534889	1535270	0.3	+	.	Target "Motif:NA_COMP16906_G1_I1" 1 382
scaffold1069_cov65	RepeatMasker	similarity	1539373	1539679	0.0	+	.	Target "Motif:NA_COMP1754_G1_I1" 1 307
scaffold1069_cov65	RepeatMasker	similarity	1539964	1540480	0.0	-	.	Target "Motif:NA_COMP21362_G1_I1" 1 517
scaffold1069_cov65	RepeatMasker	similarity	1541624	1541835	0.0	+	.	Target "Motif:NA_COMP3563_G9_I3" 160 371
scaffold1069_cov65	RepeatMasker	similarity	1549743	1550077	0.0	+	.	Target "Motif:NA_COMP8912_G1_I1" 1 335
scaffold1069_cov65	RepeatMasker	similarity	1557644	1557930	4.7	-	.	Target "Motif:NA_COMP3098_G1_I2" 1 282
scaffold1069_cov65	RepeatMasker	similarity	1567755	1568031	0.0	+	.	Target "Motif:NA_COMP45274_G1_I1" 1 277
scaffold1069_cov65	RepeatMasker	similarity	1571178	1571485	0.3	+	.	Target "Motif:SIMPLE_REPEAT_COMP21716_G1_I1" 1 308
scaffold1069_cov65	RepeatMasker	similarity	1586923	1587282	0.0	+	.	Target "Motif:NA_COMP3339_G2_I1" 1 360
scaffold1069_cov65	RepeatMasker	similarity	1587298	1587392	9.5	-	.	Target "Motif:NA_COMP3475_G21_I1" 171 265
scaffold1069_cov65	RepeatMasker	similarity	1596782	1597210	0.2	+	.	Target "Motif:NA_COMP26441_G1_I1" 1 429
scaffold1069_cov65	RepeatMasker	similarity	1609963	1610242	0.0	-	.	Target "Motif:NA_COMP19582_G1_I1" 1 280
scaffold1069_cov65	RepeatMasker	similarity	1619317	1619593	0.0	+	.	Target "Motif:NA_COMP24841_G1_I1" 1 277
scaffold1069_cov65	RepeatMasker	similarity	1621774	1622074	0.0	-	.	Target "Motif:NA_COMP29953_G1_I1" 1 301
scaffold1069_cov65	RepeatMasker	similarity	1625456	1625621	4.8	+	.	Target "Motif:NA_COMP38534_G1_I1" 109 274
scaffold1069_cov65	RepeatMasker	similarity	1625799	1626235	0.0	-	.	Target "Motif:NA_COMP10826_G1_I1" 1 437
scaffold1069_cov65	RepeatMasker	similarity	1630141	1630495	4.8	+	.	Target "Motif:NA_COMP3131_G1_I3" 1 353
scaffold1069_cov65	RepeatMasker	similarity	1636566	1636968	0.2	+	.	Target "Motif:NA_COMP4182_G1_I1" 1 403
scaffold1069_cov65	RepeatMasker	similarity	1659562	1659811	0.0	+	.	Target "Motif:NA_COMP46581_G1_I1" 1 250
scaffold1069_cov65	RepeatMasker	similarity	1677972	1678113	5.6	-	.	Target "Motif:NA_COMP3191_G2_I1" 110 252
scaffold1069_cov65	RepeatMasker	similarity	1678282	1678830	0.2	+	.	Target "Motif:NA_COMP22125_G1_I1" 1 549
scaffold1069_cov65	RepeatMasker	similarity	1680026	1680463	0.7	-	.	Target "Motif:SIMPLE_REPEAT_COMP17959_G1_I1" 1 438
scaffold1069_cov65	RepeatMasker	similarity	1683589	1683748	0.0	-	.	Target "Motif:SIMPLE_REPEAT_COMP41770_G1_I1" 226 385
scaffold1069_cov65	RepeatMasker	similarity	1683724	1683937	0.5	+	.	Target "Motif:SIMPLE_REPEAT_COMP41770_G1_I1" 19 232
scaffold1069_cov65	RepeatMasker	similarity	1684167	1684588	0.5	+	.	Target "Motif:NA_COMP18652_G1_I1" 18 439
scaffold1069_cov65	RepeatMasker	similarity	1685061	1685311	7.0	+	.	Target "Motif:NA_COMP40763_G1_I1" 1 245
scaffold1069_cov65	RepeatMasker	similarity	1689900	1690221	0.0	-	.	Target "Motif:NA_COMP34459_G1_I1" 1 322
scaffold1069_cov65	RepeatMasker	similarity	1699204	1699447	8.5	+	.	Target "Motif:NA_COMP3571_G2_I1" 1 226
scaffold1069_cov65	RepeatMasker	similarity	1699471	1699833	9.0	+	.	Target "Motif:NA_COMP3571_G4_I1" 40 387
scaffold1069_cov65	RepeatMasker	similarity	1706562	1706924	0.0	-	.	Target "Motif:NA_COMP49324_G1_I1" 1 363
scaffold1069_cov65	RepeatMasker	similarity	1707957	1708261	3.6	-	.	Target "Motif:NA_COMP3083_G2_I1" 1 305
scaffold1069_cov65	RepeatMasker	similarity	1708121	1708333	7.6	-	.	Target "Motif:OTHERS_COMP3083_G3_I1" 1 211
scaffold1069_cov65	RepeatMasker	similarity	1708337	1708571	5.5	-	.	Target "Motif:OTHERS_COMP3083_G1_I1" 1 235
scaffold1069_cov65	RepeatMasker	similarity	1709460	1709660	6.0	+	.	Target "Motif:OTHERS_COMP3083_G3_I1" 1 222
scaffold1069_cov65	RepeatMasker	similarity	1714204	1714520	0.0	+	.	Target "Motif:SIMPLE_REPEAT_COMP33220_G1_I1" 1 317
scaffold1069_cov65	RepeatMasker	similarity	1716073	1716419	0.0	+	.	Target "Motif:NA_COMP17747_G1_I1" 17 363
scaffold1069_cov65	RepeatMasker	similarity	1723829	1724230	1.7	-	.	Target "Motif:NA_COMP45753_G1_I1" 1 402
scaffold1069_cov65	RepeatMasker	similarity	1726429	1726841	0.0	-	.	Target "Motif:NA_COMP15613_G1_I1" 1 413
scaffold1069_cov65	RepeatMasker	similarity	1730536	1730786	2.0	+	.	Target "Motif:NA_COMP45103_G1_I1" 22 272
scaffold1069_cov65	RepeatMasker	similarity	1735384	1735668	0.3	-	.	Target "Motif:NA_COMP38613_G1_I1" 1 285
scaffold1069_cov65	RepeatMasker	similarity	1736919	1737227	0.7	-	.	Target "Motif:NA_COMP43091_G1_I1" 1 309
scaffold1069_cov65	RepeatMasker	similarity	1741511	1741831	0.3	-	.	Target "Motif:SIMPLE_REPEAT_COMP31941_G1_I1" 1 321
scaffold1069_cov65	RepeatMasker	similarity	1742920	1743113	5.8	+	.	Target "Motif:NA_COMP3593_G5_I2" 117 311
scaffold1069_cov65	RepeatMasker	similarity	1754207	1754481	1.1	+	.	Target "Motif:NA_COMP5593_G1_I1" 1 275
scaffold1069_cov65	RepeatMasker	similarity	1758202	1758495	1.4	-	.	Target "Motif:NA_COMP36284_G1_I1" 1 294
scaffold1069_cov65	RepeatMasker	similarity	1761337	1761702	7.9	+	.	Target "Motif:OTHERS_COMP3603_G2_I1" 79 445
scaffold1069_cov65	RepeatMasker	similarity	1761703	1761860	6.3	+	.	Target "Motif:OTHERS_COMP3603_G3_I1" 1 158
scaffold1069_cov65	RepeatMasker	similarity	1767302	1767555	0.0	-	.	Target "Motif:NA_COMP13075_G1_I1" 1 254
scaffold1069_cov65	RepeatMasker	similarity	1773260	1773494	7.5	-	.	Target "Motif:NA_COMP3445_G3_I1" 2 228
scaffold1069_cov65	RepeatMasker	similarity	1774621	1774841	0.9	+	.	Target "Motif:NA_COMP31566_G1_I1" 18 238
scaffold1069_cov65	RepeatMasker	similarity	1778049	1778399	0.6	-	.	Target "Motif:NA_COMP4963_G1_I1" 1 351
scaffold1069_cov65	RepeatMasker	similarity	1783647	1783898	0.0	-	.	Target "Motif:NA_COMP40099_G1_I1" 1 252
scaffold1069_cov65	RepeatMasker	similarity	1790884	1791403	0.0	-	.	Target "Motif:NA_COMP43684_G1_I1" 1 520
scaffold1069_cov65	RepeatMasker	similarity	1794601	1794907	0.3	+	.	Target "Motif:NA_COMP48432_G1_I1" 1 307
scaffold1069_cov65	RepeatMasker	similarity	1798631	1798857	5.9	-	.	Target "Motif:NA_COMP3593_G5_I2" 125 346
scaffold1069_cov65	RepeatMasker	similarity	1801922	1802173	0.0	+	.	Target "Motif:NA_COMP18018_G1_I1" 1 252
scaffold1069_cov65	RepeatMasker	similarity	1803462	1803580	8.4	-	.	Target "Motif:NA_COMP3545_G3_I3" 57 175
scaffold1069_cov65	RepeatMasker	similarity	1805317	1805604	0.0	-	.	Target "Motif:NA_COMP36634_G1_I1" 1 288
scaffold1069_cov65	RepeatMasker	similarity	1825106	1825385	0.4	-	.	Target "Motif:NA_COMP48050_G1_I1" 1 280
scaffold1069_cov65	RepeatMasker	similarity	1827214	1827452	7.0	+	.	Target "Motif:NA_COMP3308_G2_I2" 30 258
scaffold1069_cov65	RepeatMasker	similarity	1827599	1827668	4.3	-	.	Target "Motif:NA_COMP3308_G2_I1" 148 217
scaffold1069_cov65	RepeatMasker	similarity	1836273	1836679	0.2	-	.	Target "Motif:NA_COMP21743_G1_I1" 1 407
scaffold1069_cov65	RepeatMasker	similarity	1844389	1844649	0.0	+	.	Target "Motif:NA_COMP11955_G1_I1" 1 261
scaffold1069_cov65	RepeatMasker	similarity	1847521	1847772	0.0	+	.	Target "Motif:NA_COMP6588_G1_I1" 1 252
scaffold1069_cov65	RepeatMasker	similarity	1854408	1854658	0.8	+	.	Target "Motif:NA_COMP8867_G1_I1" 1 251
scaffold1069_cov65	RepeatMasker	similarity	1864896	1865202	0.3	+	.	Target "Motif:NA_COMP36522_G1_I1" 1 307
scaffold1069_cov65	RepeatMasker	similarity	1880806	1881048	0.0	-	.	Target "Motif:NA_COMP26798_G1_I1" 34 276
scaffold1069_cov65	RepeatMasker	similarity	1884000	1884251	0.0	-	.	Target "Motif:NA_COMP30962_G1_I1" 1 252
scaffold1069_cov65	RepeatMasker	similarity	1884742	1884990	7.9	+	.	Target "Motif:NA_COMP3569_G16_I1" 257 496
scaffold1069_cov65	RepeatMasker	similarity	1889539	1889793	0.0	+	.	Target "Motif:NA_COMP23325_G1_I1" 1 255
scaffold1069_cov65	RepeatMasker	similarity	1890207	1890998	0.4	-	.	Target "Motif:SIMPLE_REPEAT_COMP6504_G1_I1" 1 792
scaffold1069_cov65	RepeatMasker	similarity	1895736	1895995	0.0	+	.	Target "Motif:NA_COMP27672_G1_I1" 1 260
scaffold1069_cov65	RepeatMasker	similarity	1902933	1903206	0.0	+	.	Target "Motif:NA_COMP17505_G1_I1" 1 274
scaffold1069_cov65	RepeatMasker	similarity	1904051	1904418	0.0	+	.	Target "Motif:NA_COMP18503_G1_I1" 1 368
scaffold1069_cov65	RepeatMasker	similarity	1906000	1906692	0.1	+	.	Target "Motif:NA_COMP7161_G1_I1" 1 693
scaffold1069_cov65	RepeatMasker	similarity	1910025	1910393	0.3	-	.	Target "Motif:NA_COMP17554_G1_I1" 1 369
scaffold1069_cov65	RepeatMasker	similarity	1910885	1911140	0.4	-	.	Target "Motif:NA_COMP15718_G1_I1" 1 256
scaffold1069_cov65	RepeatMasker	similarity	1914330	1914758	0.2	+	.	Target "Motif:NA_COMP3547_G23_I1" 1 429
scaffold1069_cov65	RepeatMasker	similarity	1924836	1925090	0.8	+	.	Target "Motif:NA_COMP11283_G1_I1" 1 255
scaffold1069_cov65	RepeatMasker	similarity	1925206	1925445	6.2	+	.	Target "Motif:LOW_COMPLEXITY_COMP3477_G2_I1" 1 245
scaffold1069_cov65	RepeatMasker	similarity	1925383	1925618	0.0	-	.	Target "Motif:NA_COMP26110_G1_I1" 1 236
scaffold1069_cov65	RepeatMasker	similarity	1927744	1928205	0.0	-	.	Target "Motif:NA_COMP4506_G1_I1" 1 462
scaffold1069_cov65	RepeatMasker	similarity	1950630	1950999	0.5	+	.	Target "Motif:NA_COMP46140_G1_I1" 1 370
scaffold1069_cov65	RepeatMasker	similarity	1956417	1956680	0.0	-	.	Target "Motif:NA_COMP16769_G1_I1" 1 264
scaffold1069_cov65	RepeatMasker	similarity	1957638	1957931	0.3	-	.	Target "Motif:NA_COMP49592_G1_I1" 15 308
scaffold1069_cov65	RepeatMasker	similarity	1961835	1962145	0.0	+	.	Target "Motif:NA_COMP32096_G1_I1" 1 311
scaffold1069_cov65	RepeatMasker	similarity	1962156	1962411	0.0	+	.	Target "Motif:NA_COMP22505_G1_I1" 1 256
scaffold1069_cov65	RepeatMasker	similarity	1963730	1963935	8.7	+	.	Target "Motif:NA_COMP3498_G12_I1" 431 636
scaffold1069_cov65	RepeatMasker	similarity	1977367	1977776	0.0	+	.	Target "Motif:NA_COMP31562_G1_I1" 1 410
scaffold1069_cov65	RepeatMasker	similarity	1991222	1991925	0.0	+	.	Target "Motif:NA_COMP27240_G1_I1" 1 704
scaffold1069_cov65	RepeatMasker	similarity	1992595	1993055	0.0	+	.	Target "Motif:NA_COMP5375_G1_I1" 1 461
scaffold1069_cov65	RepeatMasker	similarity	2008005	2008620	0.8	+	.	Target "Motif:NA_COMP34548_G1_I1" 3 618
scaffold1069_cov65	RepeatMasker	similarity	2010675	2010835	0.0	+	.	Target "Motif:LOW_COMPLEXITY_COMP20655_G1_I1" 1 161
scaffold1069_cov65	RepeatMasker	similarity	2015958	2016346	1.3	+	.	Target "Motif:NA_COMP3765_G1_I1" 1 389
scaffold1069_cov65	RepeatMasker	similarity	2018020	2018583	0.0	-	.	Target "Motif:SIMPLE_REPEAT_COMP34619_G1_I1" 1 564
scaffold1069_cov65	RepeatMasker	similarity	2018918	2019286	0.0	+	.	Target "Motif:LOW_COMPLEXITY_COMP18391_G1_I1" 1 369
scaffold1069_cov65	RepeatMasker	similarity	2024450	2024595	8.2	-	.	Target "Motif:OTHERS_COMP3603_G3_I1" 15 164
scaffold1069_cov65	RepeatMasker	similarity	2024599	2025017	8.4	-	.	Target "Motif:OTHERS_COMP3603_G2_I1" 21 445
scaffold1069_cov65	RepeatMasker	similarity	2025045	2025714	6.7	-	.	Target "Motif:OTHERS_COMP3603_G1_I6" 193 874
scaffold1069_cov65	RepeatMasker	similarity	2027270	2027505	4.7	+	.	Target "Motif:NA_COMP17327_G1_I1" 1 236
scaffold1069_cov65	RepeatMasker	similarity	2034985	2035293	0.0	-	.	Target "Motif:NA_COMP37155_G1_I1" 1 309
scaffold1069_cov65	RepeatMasker	similarity	2038923	2039166	0.0	-	.	Target "Motif:NA_COMP36967_G1_I1" 1 244
scaffold1069_cov65	RepeatMasker	similarity	2040844	2041272	0.0	+	.	Target "Motif:NA_COMP3212_G1_I1" 1 426
scaffold1069_cov65	RepeatMasker	similarity	2052060	2052484	0.0	-	.	Target "Motif:NA_COMP23652_G1_I1" 1 425
scaffold1069_cov65	RepeatMasker	similarity	2054199	2054600	0.0	+	.	Target "Motif:NA_COMP13994_G1_I1" 1 402
scaffold1069_cov65	RepeatMasker	similarity	2067099	2067367	0.7	+	.	Target "Motif:NA_COMP32196_G1_I1" 1 269
scaffold1069_cov65	RepeatMasker	similarity	2074798	2075527	1.5	+	.	Target "Motif:NA_COMP12731_G1_I1" 1 730
scaffold1069_cov65	RepeatMasker	similarity	2102259	2102582	0.3	+	.	Target "Motif:NA_COMP13100_G1_I1" 1 324
scaffold1069_cov65	RepeatMasker	similarity	2103884	2104577	0.0	+	.	Target "Motif:NA_COMP40053_G1_I1" 1 694
scaffold1069_cov65	RepeatMasker	similarity	2105123	2105414	0.3	-	.	Target "Motif:NA_COMP24193_G1_I1" 1 292
scaffold1069_cov65	RepeatMasker	similarity	2108437	2108835	0.0	+	.	Target "Motif:NA_COMP43480_G1_I1" 1 399
scaffold1069_cov65	RepeatMasker	similarity	2117022	2117328	0.3	-	.	Target "Motif:NA_COMP16626_G1_I1" 1 307
scaffold1069_cov65	RepeatMasker	similarity	2127141	2127435	0.0	+	.	Target "Motif:NA_COMP38667_G1_I1" 1 295
scaffold1069_cov65	RepeatMasker	similarity	2129234	2129495	0.0	+	.	Target "Motif:NA_COMP37263_G1_I1" 1 262
scaffold1069_cov65	RepeatMasker	similarity	2142024	2142346	0.3	-	.	Target "Motif:NA_COMP50108_G1_I1" 1 323
scaffold1069_cov65	RepeatMasker	similarity	2143676	2143951	0.4	+	.	Target "Motif:NA_COMP9686_G1_I1" 1 276
scaffold1069_cov65	RepeatMasker	similarity	2148409	2148676	0.0	+	.	Target "Motif:NA_COMP4852_G1_I1" 3 270
scaffold1069_cov65	RepeatMasker	similarity	2149386	2149635	0.0	+	.	Target "Motif:NA_COMP45406_G1_I1" 1 250
scaffold1069_cov65	RepeatMasker	similarity	2158297	2158743	0.0	-	.	Target "Motif:NA_COMP49174_G1_I1" 1 447
scaffold1069_cov65	RepeatMasker	similarity	2159070	2159480	0.0	+	.	Target "Motif:NA_COMP4287_G1_I1" 1 411
scaffold1069_cov65	RepeatMasker	similarity	2164196	2164447	0.4	+	.	Target "Motif:NA_COMP32611_G1_I1" 1 254
scaffold1069_cov65	RepeatMasker	similarity	2165084	2165426	2.6	+	.	Target "Motif:NA_COMP29884_G1_I1" 271 613
scaffold1069_cov65	RepeatMasker	similarity	2166078	2166423	0.0	-	.	Target "Motif:NA_COMP29884_G1_I1" 1 346
scaffold1069_cov65	RepeatMasker	similarity	2166764	2167270	0.2	-	.	Target "Motif:NA_COMP28135_G1_I1" 27 533
scaffold1069_cov65	RepeatMasker	similarity	2170879	2171186	0.0	-	.	Target "Motif:NA_COMP21934_G1_I1" 1 308
scaffold1069_cov65	RepeatMasker	similarity	2174120	2174399	0.0	-	.	Target "Motif:NA_COMP14049_G1_I1" 1 280
scaffold1069_cov65	RepeatMasker	similarity	2179014	2179342	0.6	-	.	Target "Motif:NA_COMP8799_G1_I1" 1 329
scaffold1069_cov65	RepeatMasker	similarity	2183483	2183781	0.0	-	.	Target "Motif:NA_COMP7588_G1_I1" 1 299
scaffold1069_cov65	RepeatMasker	similarity	2191490	2191760	0.4	+	.	Target "Motif:NA_COMP30751_G1_I1" 1 271
scaffold1069_cov65	RepeatMasker	similarity	2191903	2192412	0.0	-	.	Target "Motif:NA_COMP21932_G1_I1" 1 510
scaffold1069_cov65	RepeatMasker	similarity	2195993	2196499	1.8	-	.	Target "Motif:NA_COMP38243_G1_I1" 7 512
scaffold1069_cov65	RepeatMasker	similarity	2206202	2206414	0.0	-	.	Target "Motif:NA_COMP10617_G1_I1" 17 229
scaffold1069_cov65	RepeatMasker	similarity	2207410	2207690	0.0	+	.	Target "Motif:NA_COMP26220_G1_I1" 1 281
scaffold1069_cov65	RepeatMasker	similarity	2236043	2236298	0.0	-	.	Target "Motif:NA_COMP16747_G1_I1" 1 256
scaffold1069_cov65	RepeatMasker	similarity	2242443	2242538	0.0	-	.	Target "Motif:NA_COMP33500_G1_I1" 1 96
scaffold1069_cov65	RepeatMasker	similarity	2243331	2243570	7.9	-	.	Target "Motif:SIMPLE_REPEAT_COMP3584_G1_I7" 3 243
scaffold1069_cov65	RepeatMasker	similarity	2245976	2246695	0.0	+	.	Target "Motif:NA_COMP9846_G1_I1" 1 720
scaffold1069_cov65	RepeatMasker	similarity	2246959	2247257	0.0	-	.	Target "Motif:NA_COMP19410_G1_I1" 1 299
scaffold1069_cov65	RepeatMasker	similarity	2256272	2256559	0.3	-	.	Target "Motif:NA_COMP45150_G1_I1" 1 288
scaffold1069_cov65	RepeatMasker	similarity	2259350	2259604	0.4	-	.	Target "Motif:NA_COMP32418_G1_I1" 1 255
scaffold1069_cov65	RepeatMasker	similarity	2280305	2280591	0.0	-	.	Target "Motif:NA_COMP13455_G1_I1" 1 287
scaffold1069_cov65	RepeatMasker	similarity	2285068	2285513	0.0	+	.	Target "Motif:NA_COMP21277_G1_I1" 1 446
scaffold1069_cov65	RepeatMasker	similarity	2295487	2295782	0.7	+	.	Target "Motif:NA_COMP22231_G1_I1" 1 296
scaffold1069_cov65	RepeatMasker	similarity	2300483	2300776	0.0	-	.	Target "Motif:NA_COMP3852_G1_I1" 1 294
scaffold1069_cov65	RepeatMasker	similarity	2305171	2305452	0.7	-	.	Target "Motif:NA_COMP40183_G1_I1" 1 282
scaffold1069_cov65	RepeatMasker	similarity	2322672	2323000	1.5	-	.	Target "Motif:NA_COMP31906_G1_I1" 1 329
scaffold1069_cov65	RepeatMasker	similarity	2323995	2324303	0.7	-	.	Target "Motif:NA_COMP42319_G1_I1" 1 309
scaffold1069_cov65	RepeatMasker	similarity	2353967	2354579	0.0	-	.	Target "Motif:NA_COMP43758_G1_I1" 1 613
scaffold1069_cov65	RepeatMasker	similarity	2355833	2356148	0.0	-	.	Target "Motif:SIMPLE_REPEAT_COMP7714_G1_I1" 1 316
scaffold1069_cov65	RepeatMasker	similarity	2373383	2373657	0.0	+	.	Target "Motif:NA_COMP34773_G1_I1" 1 275
scaffold1069_cov65	RepeatMasker	similarity	2378565	2378842	0.0	-	.	Target "Motif:NA_COMP42513_G1_I1" 1 278
scaffold1069_cov65	RepeatMasker	similarity	2387074	2387340	0.8	-	.	Target "Motif:NA_COMP27142_G1_I1" 1 267
scaffold1069_cov65	RepeatMasker	similarity	2405424	2405701	0.0	+	.	Target "Motif:SIMPLE_REPEAT_COMP24265_G1_I1" 1 278
scaffold1069_cov65	RepeatMasker	similarity	2406539	2406812	0.0	-	.	Target "Motif:NA_COMP12825_G1_I1" 1 274
scaffold1069_cov65	RepeatMasker	similarity	2421488	2421977	0.0	-	.	Target "Motif:SIMPLE_REPEAT_COMP45395_G1_I1" 97 586
scaffold1069_cov65	RepeatMasker	similarity	2422525	2422812	0.3	-	.	Target "Motif:SIMPLE_REPEAT_COMP44929_G1_I1" 1 288
scaffold1069_cov65	RepeatMasker	similarity	2427681	2428035	0.0	-	.	Target "Motif:LOW_COMPLEXITY_COMP35985_G1_I1" 1 355
scaffold1069_cov65	RepeatMasker	similarity	2430663	2430912	0.0	-	.	Target "Motif:NA_COMP50406_G1_I1" 1 250
scaffold10700_cov62	RepeatMasker	similarity	1	190	0.0	+	.	Target "Motif:NA_COMP49777_G1_I1" 30 219
scaffold10700_cov62	RepeatMasker	similarity	495	634	9.3	-	.	Target "Motif:NA_COMP3464_G6_I1" 1 140
scaffold107090_cov62	RepeatMasker	similarity	106	423	0.0	-	.	Target "Motif:NA_COMP46184_G1_I1" 1 318
scaffold107124_cov74	RepeatMasker	similarity	241	393	2.6	+	.	Target "Motif:OTHERS_COMP3523_G1_I3" 93 245
scaffold107124_cov74	RepeatMasker	similarity	387	610	2.2	+	.	Target "Motif:OTHERS_COMP3523_G1_I1" 234 457
scaffold10714_cov52	RepeatMasker	similarity	3603	3833	0.4	-	.	Target "Motif:SIMPLE_REPEAT_COMP50407_G1_I1" 1 231
scaffold10714_cov52	RepeatMasker	similarity	12403	12652	0.0	+	.	Target "Motif:NA_COMP50850_G1_I1" 1 250
scaffold10714_cov52	RepeatMasker	similarity	29185	29515	4.8	-	.	Target "Motif:NA_COMP3530_G14_I2" 2 332
scaffold10714_cov52	RepeatMasker	similarity	41317	41581	0.8	-	.	Target "Motif:NA_COMP40104_G1_I1" 1 265
scaffold10714_cov52	RepeatMasker	similarity	41553	41683	3.0	-	.	Target "Motif:NA_COMP3530_G22_I3" 1 131
scaffold10714_cov52	RepeatMasker	similarity	49136	49400	2.3	+	.	Target "Motif:NA_COMP32065_G1_I1" 166 434
scaffold10714_cov52	RepeatMasker	similarity	54798	54982	1.1	-	.	Target "Motif:NA_COMP42540_G1_I1" 230 414
scaffold10714_cov52	RepeatMasker	similarity	65243	65621	0.0	-	.	Target "Motif:NA_COMP10080_G1_I1" 116 494
scaffold10714_cov52	RepeatMasker	similarity	71270	71487	0.0	+	.	Target "Motif:NA_COMP48102_G1_I1" 1 218
scaffold10714_cov52	RepeatMasker	similarity	90144	90508	0.3	-	.	Target "Motif:NA_COMP48212_G1_I1" 1 365
scaffold10714_cov52	RepeatMasker	similarity	97747	97831	8.2	+	.	Target "Motif:NA_COMP3463_G1_I8" 490 574
scaffold10714_cov52	RepeatMasker	similarity	98268	98331	9.4	-	.	Target "Motif:NA_COMP3362_G3_I2" 261 333
scaffold10714_cov52	RepeatMasker	similarity	110170	110365	0.0	-	.	Target "Motif:NA_COMP3455_G2_I4" 1 196
scaffold10714_cov52	RepeatMasker	similarity	111089	111338	2.0	+	.	Target "Motif:NA_COMP3530_G32_I1" 1 250
scaffold10714_cov52	RepeatMasker	similarity	115564	115798	0.0	-	.	Target "Motif:NA_COMP44836_G1_I1" 1 235
scaffold10714_cov52	RepeatMasker	similarity	119378	119616	0.0	-	.	Target "Motif:SIMPLE_REPEAT_COMP36013_G1_I1" 1 239
scaffold10714_cov52	RepeatMasker	similarity	123407	123842	0.0	+	.	Target "Motif:NA_COMP5552_G1_I1" 1 436
scaffold10714_cov52	RepeatMasker	similarity	125846	126392	0.0	-	.	Target "Motif:NA_COMP44480_G1_I1" 1 547
scaffold10714_cov52	RepeatMasker	similarity	126912	127215	0.0	+	.	Target "Motif:NA_COMP37512_G1_I1" 1 304
scaffold10714_cov52	RepeatMasker	similarity	143133	143535	0.0	-	.	Target "Motif:NA_COMP1176_G1_I1" 1 403
scaffold10714_cov52	RepeatMasker	similarity	146887	147044	9.5	-	.	Target "Motif:NA_COMP3552_G15_I1" 1 158
scaffold10714_cov52	RepeatMasker	similarity	172460	172733	0.0	+	.	Target "Motif:NA_COMP39103_G1_I1" 1 274
scaffold10714_cov52	RepeatMasker	similarity	173324	173694	0.0	-	.	Target "Motif:NA_COMP9478_G1_I1" 1 371
scaffold10714_cov52	RepeatMasker	similarity	178726	178980	0.0	+	.	Target "Motif:NA_COMP4731_G1_I1" 1 255
scaffold10714_cov52	RepeatMasker	similarity	192558	193052	0.4	-	.	Target "Motif:NA_COMP24978_G1_I1" 1 495
scaffold10714_cov52	RepeatMasker	similarity	194144	194518	0.3	+	.	Target "Motif:OTHERS_COMP39533_G1_I1" 1 375
scaffold10714_cov52	RepeatMasker	similarity	199059	199257	7.6	-	.	Target "Motif:NA_COMP3530_G15_I1" 3 201
scaffold10714_cov52	RepeatMasker	similarity	203030	203310	3.2	+	.	Target "Motif:NA_COMP12307_G1_I1" 1 281
scaffold10714_cov52	RepeatMasker	similarity	214509	214789	0.0	+	.	Target "Motif:SIMPLE_REPEAT_COMP32926_G1_I1" 1 281
scaffold10714_cov52	RepeatMasker	similarity	234645	234824	2.8	+	.	Target "Motif:NA_COMP3402_G5_I2" 132 317
scaffold10714_cov52	RepeatMasker	similarity	240624	240878	0.0	+	.	Target "Motif:NA_COMP35728_G1_I1" 1 255
scaffold10714_cov52	RepeatMasker	similarity	242505	242767	0.0	+	.	Target "Motif:NA_COMP9562_G1_I1" 1 263
scaffold10714_cov52	RepeatMasker	similarity	244170	244444	0.4	+	.	Target "Motif:SIMPLE_REPEAT_COMP24972_G1_I1" 1 275
scaffold10714_cov52	RepeatMasker	similarity	254291	254404	9.8	-	.	Target "Motif:NA_COMP3402_G3_I1" 165 284
scaffold10714_cov52	RepeatMasker	similarity	256069	256273	0.0	-	.	Target "Motif:NA_COMP27075_G1_I1" 1 205
scaffold10714_cov52	RepeatMasker	similarity	261465	261660	9.7	+	.	Target "Motif:NA_COMP2720_G1_I1" 195 390
scaffold10714_cov52	RepeatMasker	similarity	261867	261912	8.7	+	.	Target "Motif:NA_COMP2720_G1_I1" 407 452
scaffold10714_cov52	RepeatMasker	similarity	269276	269617	0.0	+	.	Target "Motif:NA_COMP26322_G1_I1" 1 342
scaffold10714_cov52	RepeatMasker	similarity	296802	296915	9.7	-	.	Target "Motif:NA_COMP3458_G7_I1" 41 159
scaffold10714_cov52	RepeatMasker	similarity	300544	300793	0.4	+	.	Target "Motif:NA_COMP46578_G1_I1" 1 250
scaffold10714_cov52	RepeatMasker	similarity	301276	301680	2.8	-	.	Target "Motif:LOW_COMPLEXITY_COMP11777_G1_I1" 14 412
scaffold10714_cov52	RepeatMasker	similarity	316619	316765	9.6	+	.	Target "Motif:SIMPLE_REPEAT_COMP3421_G1_I2" 148 303
scaffold10714_cov52	RepeatMasker	similarity	316785	316965	8.3	+	.	Target "Motif:SIMPLE_REPEAT_COMP3421_G1_I2" 497 677
scaffold10714_cov52	RepeatMasker	similarity	323814	323900	9.8	+	.	Target "Motif:NA_COMP3504_G3_I2" 115 199
scaffold10714_cov52	RepeatMasker	similarity	324445	324624	4.6	+	.	Target "Motif:NA_COMP3193_G1_I1" 107 282
scaffold10714_cov52	RepeatMasker	similarity	329720	330220	0.2	+	.	Target "Motif:NA_COMP3510_G21_I1" 37 537
scaffold10714_cov52	RepeatMasker	similarity	332980	333195	0.0	+	.	Target "Motif:NA_COMP27283_G1_I1" 1 216
scaffold10714_cov52	RepeatMasker	similarity	333510	334010	0.2	-	.	Target "Motif:NA_COMP3510_G21_I1" 37 537
scaffold10714_cov52	RepeatMasker	similarity	334232	334282	6.0	+	.	Target "Motif:NA_COMP3331_G5_I2" 208 257
scaffold10714_cov52	RepeatMasker	similarity	334678	334789	8.0	-	.	Target "Motif:NA_COMP3549_G8_I2" 287 398
scaffold10714_cov52	RepeatMasker	similarity	341048	341329	0.0	+	.	Target "Motif:NA_COMP29316_G1_I1" 1 282
scaffold10714_cov52	RepeatMasker	similarity	342686	342755	8.6	+	.	Target "Motif:NA_COMP2427_G1_I1" 19 88
scaffold10714_cov52	RepeatMasker	similarity	351515	351645	0.8	+	.	Target "Motif:OTHERS_COMP34244_G1_I1" 359 489
scaffold10714_cov52	RepeatMasker	similarity	351853	352218	0.3	-	.	Target "Motif:OTHERS_COMP34244_G1_I1" 1 366
scaffold10714_cov52	RepeatMasker	similarity	353279	353875	0.2	+	.	Target "Motif:NA_COMP7922_G1_I1" 1 597
scaffold10715_cov38	RepeatMasker	similarity	3097	3168	8.6	+	.	Target "Motif:NA_COMP3590_G8_I1" 1 71
scaffold10715_cov38	RepeatMasker	similarity	3168	3391	4.5	+	.	Target "Motif:NA_COMP3590_G8_I1" 1 223
scaffold107272_cov38	RepeatMasker	similarity	1	266	0.0	-	.	Target "Motif:LOW_COMPLEXITY_COMP14102_G1_I1" 1 266
scaffold107491_cov56	RepeatMasker	similarity	789	933	9.7	+	.	Target "Motif:NA_COMP7397_G1_I1" 346 492
scaffold107527_cov64	RepeatMasker	similarity	1	570	7.7	-	.	Target "Motif:LINE_COMP3462_G2_I7" 38 607
scaffold107545_cov10	RepeatMasker	similarity	159	367	8.1	-	.	Target "Motif:NA_COMP3023_G1_I1" 1 212
scaffold10754_cov49	RepeatMasker	similarity	304	469	8.5	+	.	Target "Motif:NA_COMP3587_G7_I3" 86 259
scaffold10754_cov49	RepeatMasker	similarity	381	560	8.6	+	.	Target "Motif:LOW_COMPLEXITY_COMP3587_G6_I1" 2 181
scaffold10754_cov49	RepeatMasker	similarity	381	541	5.7	+	.	Target "Motif:NA_COMP3587_G6_I4" 2 164
scaffold10754_cov49	RepeatMasker	similarity	2598	2784	9.1	+	.	Target "Motif:NA_COMP3522_G9_I2" 6 219
scaffold107599_cov38	RepeatMasker	similarity	536	893	0.6	+	.	Target "Motif:NA_COMP887_G2_I1" 1 358
scaffold107599_cov38	RepeatMasker	similarity	715	1036	6.9	+	.	Target "Motif:NA_COMP887_G2_I1" 87 358
scaffold107599_cov38	RepeatMasker	similarity	1008	1488	0.0	+	.	Target "Motif:SIMPLE_REPEAT_COMP887_G1_I1" 1 481
scaffold1075_cov31	RepeatMasker	similarity	288	498	9.5	-	.	Target "Motif:NA_COMP3023_G1_I1" 1 212
scaffold107612_cov38	RepeatMasker	similarity	1	182	0.0	-	.	Target "Motif:NA_COMP50312_G1_I1" 1 182
scaffold107683_cov41	RepeatMasker	similarity	161	519	3.3	-	.	Target "Motif:LTR_COMP3417_G1_I1" 659 1017
scaffold1077_cov67	RepeatMasker	similarity	238	461	0.5	-	.	Target "Motif:LINE_COMP48872_G1_I1" 1 224
scaffold1077_cov67	RepeatMasker	similarity	2444	2659	4.6	+	.	Target "Motif:LOW_COMPLEXITY_COMP17751_G1_I1" 329 552
scaffold1077_cov67	RepeatMasker	similarity	2641	2873	0.0	+	.	Target "Motif:NA_COMP50271_G1_I1" 1 233
scaffold1077_cov67	RepeatMasker	similarity	3191	3492	0.0	-	.	Target "Motif:NA_COMP13747_G1_I1" 1 302
scaffold1077_cov67	RepeatMasker	similarity	4014	4331	0.9	-	.	Target "Motif:LINE_COMP39003_G1_I1" 2 319
scaffold1077_cov67	RepeatMasker	similarity	15561	16165	0.0	-	.	Target "Motif:NA_COMP3988_G1_I1" 1 605
scaffold1077_cov67	RepeatMasker	similarity	18996	19285	1.4	-	.	Target "Motif:NA_COMP35124_G1_I1" 1 290
scaffold1077_cov67	RepeatMasker	similarity	21364	21699	6.0	+	.	Target "Motif:NA_COMP3208_G1_I1" 15 350
scaffold1077_cov67	RepeatMasker	similarity	21657	22137	1.5	+	.	Target "Motif:NA_COMP3208_G2_I1" 1 493
scaffold1077_cov67	RepeatMasker	similarity	23892	24326	0.0	-	.	Target "Motif:NA_COMP33292_G1_I1" 1 435
scaffold1077_cov67	RepeatMasker	similarity	31071	31349	0.0	+	.	Target "Motif:NA_COMP30395_G1_I1" 1 279
scaffold1077_cov67	RepeatMasker	similarity	32134	32422	0.0	-	.	Target "Motif:NA_COMP44134_G1_I1" 1 289
scaffold1077_cov67	RepeatMasker	similarity	32947	33199	0.0	-	.	Target "Motif:NA_COMP3747_G1_I1" 1 253
scaffold1077_cov67	RepeatMasker	similarity	33932	34181	0.4	+	.	Target "Motif:NA_COMP46631_G1_I1" 1 250
scaffold1077_cov67	RepeatMasker	similarity	39808	40092	0.0	-	.	Target "Motif:NA_COMP41644_G1_I1" 1 285
scaffold1077_cov67	RepeatMasker	similarity	47754	48004	3.6	+	.	Target "Motif:NA_COMP3538_G4_I1" 1 251
scaffold1077_cov67	RepeatMasker	similarity	55512	55699	9.0	+	.	Target "Motif:NA_COMP3567_G7_I3" 127 314
scaffold1077_cov67	RepeatMasker	similarity	59656	59972	0.0	+	.	Target "Motif:NA_COMP33631_G1_I1" 18 334
scaffold1077_cov67	RepeatMasker	similarity	66364	66634	0.4	-	.	Target "Motif:NA_COMP22925_G1_I1" 1 271
scaffold1077_cov67	RepeatMasker	similarity	71490	72014	0.8	-	.	Target "Motif:NA_COMP16391_G1_I1" 1 525
scaffold1077_cov67	RepeatMasker	similarity	74016	74244	9.6	+	.	Target "Motif:NA_COMP3477_G7_I3" 2 230
scaffold1077_cov67	RepeatMasker	similarity	74407	74660	6.8	+	.	Target "Motif:NA_COMP3501_G15_I2" 167 391
scaffold1077_cov67	RepeatMasker	similarity	75216	75408	6.2	+	.	Target "Motif:NA_COMP3507_G8_I2" 2 194
scaffold1077_cov67	RepeatMasker	similarity	77530	77760	7.6	-	.	Target "Motif:NA_COMP3475_G17_I1" 1 223
scaffold1077_cov67	RepeatMasker	similarity	79623	79857	3.4	+	.	Target "Motif:NA_COMP3545_G3_I2" 1 235
scaffold1077_cov67	RepeatMasker	similarity	83915	84208	0.3	+	.	Target "Motif:NA_COMP44732_G1_I1" 1 294
scaffold1077_cov67	RepeatMasker	similarity	84284	84689	0.2	+	.	Target "Motif:LOW_COMPLEXITY_COMP24145_G1_I1" 1 406
scaffold1077_cov67	RepeatMasker	similarity	87033	87170	5.8	+	.	Target "Motif:NA_COMP3507_G2_I1" 261 398
scaffold1077_cov67	RepeatMasker	similarity	95712	95919	5.3	+	.	Target "Motif:NA_COMP3498_G12_I1" 429 636
scaffold1077_cov67	RepeatMasker	similarity	100670	101277	0.3	+	.	Target "Motif:OTHERS_COMP14072_G1_I1" 1 608
scaffold1077_cov67	RepeatMasker	similarity	102822	103308	0.2	-	.	Target "Motif:NA_COMP13253_G1_I1" 32 518
scaffold1077_cov67	RepeatMasker	similarity	106131	106346	3.2	-	.	Target "Motif:NA_COMP3289_G8_I1" 68 283
scaffold1077_cov67	RepeatMasker	similarity	106618	106822	9.8	+	.	Target "Motif:NA_COMP3255_G1_I4" 78 292
scaffold1077_cov67	RepeatMasker	similarity	111231	111480	2.4	+	.	Target "Motif:SIMPLE_REPEAT_COMP16197_G1_I1" 1 250
scaffold1077_cov67	RepeatMasker	similarity	111592	111882	0.0	-	.	Target "Motif:NA_COMP33800_G1_I1" 1 291
scaffold1077_cov67	RepeatMasker	similarity	115250	115498	3.6	+	.	Target "Motif:NA_COMP3572_G12_I1" 1 249
scaffold1077_cov67	RepeatMasker	similarity	118457	118776	0.6	+	.	Target "Motif:NA_COMP3932_G1_I1" 1 320
scaffold1077_cov67	RepeatMasker	similarity	118757	119053	0.0	+	.	Target "Motif:NA_COMP30601_G1_I1" 1 297
scaffold1077_cov67	RepeatMasker	similarity	125489	125723	0.0	-	.	Target "Motif:NA_COMP25924_G1_I1" 1 235
scaffold1077_cov67	RepeatMasker	similarity	127355	127484	2.4	+	.	Target "Motif:NA_COMP3507_G8_I3" 125 258
scaffold1077_cov67	RepeatMasker	similarity	127475	127693	0.0	+	.	Target "Motif:NA_COMP38992_G1_I1" 1 219
scaffold1077_cov67	RepeatMasker	similarity	133151	133352	5.1	+	.	Target "Motif:NA_COMP3507_G8_I3" 59 258
scaffold1077_cov67	RepeatMasker	similarity	138217	138467	6.8	-	.	Target "Motif:NA_COMP3515_G1_I4" 57 312
scaffold1077_cov67	RepeatMasker	similarity	138872	139070	6.7	+	.	Target "Motif:NA_COMP3441_G6_I1" 1 180
scaffold1077_cov67	RepeatMasker	similarity	138909	139170	9.2	+	.	Target "Motif:NA_COMP3441_G1_I10" 1 263
scaffold1077_cov67	RepeatMasker	similarity	139170	139372	6.0	+	.	Target "Motif:NA_COMP3440_G3_I1" 61 260
scaffold1077_cov67	RepeatMasker	similarity	139753	139942	6.4	-	.	Target "Motif:NA_COMP3593_G5_I2" 123 348
scaffold1077_cov67	RepeatMasker	similarity	140191	140524	0.9	+	.	Target "Motif:LOW_COMPLEXITY_COMP44461_G1_I1" 1 334
scaffold1077_cov67	RepeatMasker	similarity	140414	140549	9.6	+	.	Target "Motif:LOW_COMPLEXITY_COMP44461_G1_I1" 102 236
scaffold1077_cov67	RepeatMasker	similarity	144409	144585	8.9	+	.	Target "Motif:NA_COMP3587_G6_I4" 1 169
scaffold1077_cov67	RepeatMasker	similarity	145387	145627	4.7	+	.	Target "Motif:NA_COMP3507_G8_I3" 24 258
scaffold1077_cov67	RepeatMasker	similarity	145565	145642	9.3	-	.	Target "Motif:NA_COMP3595_G5_I1" 446 520
scaffold1077_cov67	RepeatMasker	similarity	148876	149106	3.5	+	.	Target "Motif:NA_COMP2434_G1_I1" 11 241
scaffold1077_cov67	RepeatMasker	similarity	150857	151155	0.0	-	.	Target "Motif:NA_COMP3898_G1_I1" 1 299
scaffold1077_cov67	RepeatMasker	similarity	151525	151729	0.0	+	.	Target "Motif:NA_COMP28879_G1_I1" 1 205
scaffold1077_cov67	RepeatMasker	similarity	153584	153811	3.6	-	.	Target "Motif:NA_COMP3593_G5_I2" 125 351
scaffold1077_cov67	RepeatMasker	similarity	154040	154227	8.2	+	.	Target "Motif:NA_COMP3410_G11_I1" 1 189
scaffold1077_cov67	RepeatMasker	similarity	158462	158646	10.0	+	.	Target "Motif:NA_COMP3448_G12_I1" 1 193
scaffold1077_cov67	RepeatMasker	similarity	162191	162359	4.7	+	.	Target "Motif:NA_COMP3599_G9_I1" 87 255
scaffold1077_cov67	RepeatMasker	similarity	162210	162437	7.6	-	.	Target "Motif:NA_COMP3410_G11_I1" 1 224
scaffold1077_cov67	RepeatMasker	similarity	164617	164924	0.0	+	.	Target "Motif:NA_COMP33243_G1_I1" 1 308
scaffold1077_cov67	RepeatMasker	similarity	167687	168063	0.0	+	.	Target "Motif:SIMPLE_REPEAT_COMP22091_G2_I1" 1 377
scaffold1077_cov67	RepeatMasker	similarity	169727	170044	0.0	+	.	Target "Motif:NA_COMP6734_G1_I1" 1 318
scaffold1077_cov67	RepeatMasker	similarity	170503	170712	0.0	-	.	Target "Motif:NA_COMP2740_G1_I1" 1 210
scaffold1077_cov67	RepeatMasker	similarity	178736	178940	0.5	-	.	Target "Motif:OTHERS_COMP48759_G1_I1" 1 204
scaffold1077_cov67	RepeatMasker	similarity	178949	179261	0.0	+	.	Target "Motif:NA_COMP5062_G1_I1" 1 313
scaffold1077_cov67	RepeatMasker	similarity	181193	181409	0.0	+	.	Target "Motif:NA_COMP35664_G1_I1" 1 217
scaffold1077_cov67	RepeatMasker	similarity	183088	183220	8.3	+	.	Target "Motif:NA_COMP3501_G11_I3" 118 250
scaffold1077_cov67	RepeatMasker	similarity	183237	183436	2.5	-	.	Target "Motif:NA_COMP3486_G7_I2" 1 216
scaffold1077_cov67	RepeatMasker	similarity	183875	184243	0.0	+	.	Target "Motif:NA_COMP16231_G1_I1" 1 369
scaffold1077_cov67	RepeatMasker	similarity	184196	184334	4.3	-	.	Target "Motif:NA_COMP3308_G2_I2" 119 265
scaffold1077_cov67	RepeatMasker	similarity	184834	185179	2.0	+	.	Target "Motif:NA_COMP1403_G2_I1" 230 574
scaffold1077_cov67	RepeatMasker	similarity	187151	187587	0.0	+	.	Target "Motif:NA_COMP5443_G1_I1" 1 437
scaffold1077_cov67	RepeatMasker	similarity	194639	194886	0.0	-	.	Target "Motif:NA_COMP2985_G3_I3" 1 248
scaffold1077_cov67	RepeatMasker	similarity	198115	198517	1.7	-	.	Target "Motif:NA_COMP30579_G1_I1" 1 403
scaffold1077_cov67	RepeatMasker	similarity	209231	209789	0.2	-	.	Target "Motif:NA_COMP11784_G1_I1" 1 559
scaffold1077_cov67	RepeatMasker	similarity	212766	212996	0.4	-	.	Target "Motif:NA_COMP35552_G1_I1" 1 231
scaffold1077_cov67	RepeatMasker	similarity	216502	216782	0.7	-	.	Target "Motif:NA_COMP27279_G1_I1" 1 281
scaffold1077_cov67	RepeatMasker	similarity	221543	221796	0.4	-	.	Target "Motif:NA_COMP29789_G1_I1" 1 254
scaffold1077_cov67	RepeatMasker	similarity	224413	224981	0.2	+	.	Target "Motif:SIMPLE_REPEAT_COMP18838_G1_I1" 1 569
scaffold1077_cov67	RepeatMasker	similarity	234118	234370	0.0	+	.	Target "Motif:NA_COMP20199_G1_I1" 1 253
scaffold1077_cov67	RepeatMasker	similarity	235757	235978	0.0	-	.	Target "Motif:NA_COMP2952_G1_I1" 1 222
scaffold1077_cov67	RepeatMasker	similarity	236241	236404	6.1	-	.	Target "Motif:NA_COMP3478_G23_I1" 1 164
scaffold1077_cov67	RepeatMasker	similarity	238463	238760	0.0	-	.	Target "Motif:NA_COMP27108_G1_I1" 1 298
scaffold1077_cov67	RepeatMasker	similarity	241451	241678	5.4	+	.	Target "Motif:NA_COMP3410_G11_I1" 1 224
scaffold1077_cov67	RepeatMasker	similarity	241522	241702	7.2	-	.	Target "Motif:NA_COMP3599_G9_I2" 22 206
scaffold1077_cov67	RepeatMasker	similarity	242445	242684	2.5	-	.	Target "Motif:NA_COMP3440_G3_I1" 13 249
scaffold1077_cov67	RepeatMasker	similarity	242946	243402	0.2	-	.	Target "Motif:NA_COMP24058_G1_I1" 10 467
scaffold1077_cov67	RepeatMasker	similarity	246018	246660	0.0	-	.	Target "Motif:NA_COMP14743_G1_I1" 1 643
scaffold1077_cov67	RepeatMasker	similarity	246959	247170	4.2	+	.	Target "Motif:NA_COMP50717_G1_I1" 1 212
scaffold1077_cov67	RepeatMasker	similarity	249903	250145	0.0	+	.	Target "Motif:NA_COMP18098_G1_I1" 1 243
scaffold1077_cov67	RepeatMasker	similarity	251037	251430	1.3	-	.	Target "Motif:SIMPLE_REPEAT_COMP40888_G1_I1" 1 394
scaffold1077_cov67	RepeatMasker	similarity	252057	252359	0.3	-	.	Target "Motif:NA_COMP24053_G1_I1" 1 303
scaffold1077_cov67	RepeatMasker	similarity	252422	252740	0.0	+	.	Target "Motif:NA_COMP15211_G1_I1" 1 319
scaffold1077_cov67	RepeatMasker	similarity	257678	257956	0.7	+	.	Target "Motif:NA_COMP9029_G1_I1" 1 279
scaffold1077_cov67	RepeatMasker	similarity	259971	260208	5.5	-	.	Target "Motif:NA_COMP3440_G3_I1" 13 249
scaffold1077_cov67	RepeatMasker	similarity	262491	262657	6.6	+	.	Target "Motif:OTHERS_COMP2523_G2_I1" 1 167
scaffold1077_cov67	RepeatMasker	similarity	262653	262876	6.2	+	.	Target "Motif:NA_COMP2586_G2_I1" 320 531
scaffold1077_cov67	RepeatMasker	similarity	262872	262967	9.4	+	.	Target "Motif:OTHERS_COMP2523_G2_I1" 163 258
scaffold1077_cov67	RepeatMasker	similarity	262964	263153	9.6	+	.	Target "Motif:NA_COMP3440_G3_I1" 13 202
scaffold1077_cov67	RepeatMasker	similarity	263152	263298	4.8	+	.	Target "Motif:NA_COMP71_G1_I2" 1 147
scaffold1077_cov67	RepeatMasker	similarity	263457	263503	8.5	+	.	Target "Motif:NA_COMP3452_G6_I1" 109 155
scaffold1077_cov67	RepeatMasker	similarity	263462	263503	2.4	+	.	Target "Motif:NA_COMP3440_G3_I1" 209 250
scaffold1077_cov67	RepeatMasker	similarity	268213	268502	4.5	-	.	Target "Motif:NA_COMP3515_G1_I4" 57 348
scaffold1077_cov67	RepeatMasker	similarity	268499	268573	5.3	-	.	Target "Motif:LOW_COMPLEXITY_COMP3545_G7_I1" 125 199
scaffold1077_cov67	RepeatMasker	similarity	268554	268819	0.0	-	.	Target "Motif:NA_COMP20457_G1_I1" 1 266
scaffold1077_cov67	RepeatMasker	similarity	268856	269109	0.0	+	.	Target "Motif:NA_COMP10324_G1_I1" 1 254
scaffold1077_cov67	RepeatMasker	similarity	276877	277024	6.8	-	.	Target "Motif:NA_COMP3599_G12_I2" 114 260
scaffold1077_cov67	RepeatMasker	similarity	276878	277056	8.6	-	.	Target "Motif:NA_COMP3599_G9_I3" 1 190
scaffold1077_cov67	RepeatMasker	similarity	278003	278269	0.4	-	.	Target "Motif:NA_COMP51239_G1_I1" 1 267
scaffold1077_cov67	RepeatMasker	similarity	278765	278948	2.7	+	.	Target "Motif:SIMPLE_REPEAT_COMP3443_G14_I1" 2 185
scaffold1077_cov67	RepeatMasker	similarity	279969	280225	8.1	-	.	Target "Motif:NA_COMP3537_G2_I5" 218 498
scaffold1077_cov67	RepeatMasker	similarity	280009	280225	6.5	-	.	Target "Motif:NA_COMP3537_G2_I2" 218 434
scaffold1077_cov67	RepeatMasker	similarity	280834	281065	6.5	+	.	Target "Motif:NA_COMP3402_G5_I2" 108 341
scaffold1077_cov67	RepeatMasker	similarity	282341	282558	8.7	-	.	Target "Motif:NA_COMP3493_G20_I1" 128 334
scaffold1077_cov67	RepeatMasker	similarity	283065	283605	0.0	-	.	Target "Motif:NA_COMP38037_G1_I1" 1 541
scaffold1077_cov67	RepeatMasker	similarity	284497	284697	9.1	+	.	Target "Motif:SIMPLE_REPEAT_COMP3467_G3_I6" 316 518
scaffold1077_cov67	RepeatMasker	similarity	285166	285424	0.0	+	.	Target "Motif:NA_COMP19635_G1_I1" 1 259
scaffold1077_cov67	RepeatMasker	similarity	285465	285550	4.7	+	.	Target "Motif:NA_COMP21043_G1_I1" 30 116
scaffold1077_cov67	RepeatMasker	similarity	285552	286291	0.0	+	.	Target "Motif:NA_COMP21043_G1_I1" 1 740
scaffold1077_cov67	RepeatMasker	similarity	288061	288384	5.0	-	.	Target "Motif:NA_COMP3493_G20_I1" 1 323
scaffold1077_cov67	RepeatMasker	similarity	288354	288748	5.1	-	.	Target "Motif:NA_COMP3528_G13_I1" 1 393
scaffold1077_cov67	RepeatMasker	similarity	289137	289345	9.1	+	.	Target "Motif:NA_COMP3440_G3_I1" 41 249
scaffold1077_cov67	RepeatMasker	similarity	289649	290021	0.0	+	.	Target "Motif:NA_COMP22114_G1_I1" 1 373
scaffold1077_cov67	RepeatMasker	similarity	291799	292053	0.8	+	.	Target "Motif:NA_COMP13680_G1_I1" 1 255
scaffold1077_cov67	RepeatMasker	similarity	302946	303142	6.1	+	.	Target "Motif:NA_COMP3606_G15_I5" 1 197
scaffold1077_cov67	RepeatMasker	similarity	309270	309513	5.3	-	.	Target "Motif:OTHERS_COMP3540_G9_I2" 202 445
scaffold1077_cov67	RepeatMasker	similarity	327141	327455	0.3	+	.	Target "Motif:NA_COMP35390_G1_I1" 1 315
scaffold1077_cov67	RepeatMasker	similarity	335186	335342	9.6	-	.	Target "Motif:NA_COMP3510_G5_I9" 101 263
scaffold1077_cov67	RepeatMasker	similarity	337517	337792	0.0	+	.	Target "Motif:NA_COMP3489_G2_I1" 1 276
scaffold1077_cov67	RepeatMasker	similarity	339552	339830	0.0	-	.	Target "Motif:NA_COMP28666_G1_I1" 1 279
scaffold1077_cov67	RepeatMasker	similarity	341784	341990	9.7	-	.	Target "Motif:NA_COMP3522_G6_I1" 4 220
scaffold1077_cov67	RepeatMasker	similarity	354810	355267	0.0	-	.	Target "Motif:SIMPLE_REPEAT_COMP10296_G1_I1" 1 458
scaffold1077_cov67	RepeatMasker	similarity	357716	358274	0.2	-	.	Target "Motif:NA_COMP16908_G1_I1" 1 559
scaffold1077_cov67	RepeatMasker	similarity	359658	359948	0.0	+	.	Target "Motif:NA_COMP33191_G1_I1" 1 291
scaffold1077_cov67	RepeatMasker	similarity	375330	375640	0.0	-	.	Target "Motif:NA_COMP19423_G1_I1" 1 311
scaffold1077_cov67	RepeatMasker	similarity	378762	379007	8.3	+	.	Target "Motif:NA_COMP3595_G5_I3" 209 452
scaffold1077_cov67	RepeatMasker	similarity	379253	379412	8.8	-	.	Target "Motif:NA_COMP3483_G3_I3" 9 169
scaffold1077_cov67	RepeatMasker	similarity	381429	381680	0.8	+	.	Target "Motif:NA_COMP28927_G1_I1" 1 252
scaffold1077_cov67	RepeatMasker	similarity	382827	383278	0.0	+	.	Target "Motif:NA_COMP27623_G1_I1" 1 452
scaffold1077_cov67	RepeatMasker	similarity	384689	384973	0.3	+	.	Target "Motif:NA_COMP11938_G1_I1" 1 285
scaffold1077_cov67	RepeatMasker	similarity	392317	392440	8.1	+	.	Target "Motif:NA_COMP3280_G3_I2" 2 125
scaffold1077_cov67	RepeatMasker	similarity	392840	393125	0.0	+	.	Target "Motif:SIMPLE_REPEAT_COMP45643_G1_I1" 1 286
scaffold1077_cov67	RepeatMasker	similarity	397242	397995	0.5	+	.	Target "Motif:NA_COMP10822_G1_I1" 1 754
scaffold1077_cov67	RepeatMasker	similarity	397976	398227	0.4	-	.	Target "Motif:NA_COMP16392_G1_I1" 1 252
scaffold1077_cov67	RepeatMasker	similarity	399994	400285	0.0	+	.	Target "Motif:NA_COMP10997_G1_I1" 1 292
scaffold1077_cov67	RepeatMasker	similarity	401235	401432	8.6	+	.	Target "Motif:SIMPLE_REPEAT_COMP3553_G4_I2" 1 198
scaffold1077_cov67	RepeatMasker	similarity	401421	401611	1.6	+	.	Target "Motif:NA_COMP1560_G1_I1" 1 191
scaffold1077_cov67	RepeatMasker	similarity	402525	402743	3.7	-	.	Target "Motif:NA_COMP3392_G3_I1" 1 224
scaffold1077_cov67	RepeatMasker	similarity	405830	406496	3.6	-	.	Target "Motif:OTHERS_COMP3616_G2_I2" 1 688
scaffold1077_cov67	RepeatMasker	similarity	406472	406688	4.6	+	.	Target "Motif:OTHERS_COMP3616_G1_I2" 1 217
scaffold1077_cov67	RepeatMasker	similarity	406682	406903	5.5	+	.	Target "Motif:OTHERS_COMP3472_G4_I2" 1 220
scaffold1077_cov67	RepeatMasker	similarity	409339	409576	5.2	-	.	Target "Motif:NA_COMP3507_G8_I3" 26 258
scaffold1077_cov67	RepeatMasker	similarity	412306	412809	2.4	-	.	Target "Motif:SIMPLE_REPEAT_COMP3604_G11_I12" 77 579
scaffold1077_cov67	RepeatMasker	similarity	412634	412834	4.5	-	.	Target "Motif:NA_COMP3604_G11_I8" 216 417
scaffold1077_cov67	RepeatMasker	similarity	415088	415441	1.4	+	.	Target "Motif:NA_COMP11669_G1_I1" 1 354
scaffold1077_cov67	RepeatMasker	similarity	419150	419433	0.0	-	.	Target "Motif:NA_COMP22849_G1_I1" 1 284
scaffold1077_cov67	RepeatMasker	similarity	419685	420013	0.0	-	.	Target "Motif:NA_COMP35484_G1_I1" 1 329
scaffold1077_cov67	RepeatMasker	similarity	422799	423045	9.3	-	.	Target "Motif:NA_COMP3501_G15_I2" 171 388
scaffold1077_cov67	RepeatMasker	similarity	425479	426155	0.0	+	.	Target "Motif:SIMPLE_REPEAT_COMP45733_G1_I1" 1 677
scaffold1077_cov67	RepeatMasker	similarity	438778	438910	9.8	+	.	Target "Motif:LTR_COMP3342_G3_I6" 317 449
scaffold1077_cov67	RepeatMasker	similarity	439273	440118	0.5	-	.	Target "Motif:OTHERS_COMP37252_G1_I1" 317 1162
scaffold1077_cov67	RepeatMasker	similarity	451069	451145	7.8	+	.	Target "Motif:NA_COMP3553_G2_I5" 103 179
scaffold1077_cov67	RepeatMasker	similarity	452513	452820	0.3	+	.	Target "Motif:NA_COMP50804_G1_I1" 1 308
scaffold1077_cov67	RepeatMasker	similarity	453253	453514	0.0	-	.	Target "Motif:NA_COMP14386_G1_I1" 1 262
scaffold1077_cov67	RepeatMasker	similarity	453619	453920	0.3	+	.	Target "Motif:NA_COMP21651_G1_I1" 1 302
scaffold1077_cov67	RepeatMasker	similarity	458964	459202	8.1	-	.	Target "Motif:NA_COMP3440_G3_I1" 13 255
scaffold1077_cov67	RepeatMasker	similarity	460165	460441	1.1	-	.	Target "Motif:NA_COMP5659_G1_I1" 1 277
scaffold1077_cov67	RepeatMasker	similarity	462501	462876	4.8	-	.	Target "Motif:NA_COMP3392_G1_I2" 131 533
scaffold1077_cov67	RepeatMasker	similarity	466436	466698	8.9	+	.	Target "Motif:SIMPLE_REPEAT_COMP3588_G5_I5" 96 343
scaffold1077_cov67	RepeatMasker	similarity	473065	473297	1.3	+	.	Target "Motif:NA_COMP38143_G1_I1" 1 233
scaffold1077_cov67	RepeatMasker	similarity	475763	475954	4.2	-	.	Target "Motif:NA_COMP3606_G15_I5" 1 192
scaffold1077_cov67	RepeatMasker	similarity	476010	476080	9.9	-	.	Target "Motif:NA_COMP3545_G6_I1" 135 205
scaffold1077_cov67	RepeatMasker	similarity	486202	486406	0.0	+	.	Target "Motif:NA_COMP49144_G1_I1" 16 220
scaffold1077_cov67	RepeatMasker	similarity	488577	488752	8.0	+	.	Target "Motif:NA_COMP3563_G9_I1" 41 247
scaffold1077_cov67	RepeatMasker	similarity	489217	489521	4.3	+	.	Target "Motif:NA_COMP3514_G7_I1" 110 414
scaffold1077_cov67	RepeatMasker	similarity	489593	489749	2.6	+	.	Target "Motif:NA_COMP3514_G5_I1" 1 157
scaffold1077_cov67	RepeatMasker	similarity	492488	492770	0.0	+	.	Target "Motif:NA_COMP23237_G1_I1" 1 283
scaffold1077_cov67	RepeatMasker	similarity	503551	503804	5.6	+	.	Target "Motif:NA_COMP3440_G3_I1" 7 258
scaffold1077_cov67	RepeatMasker	similarity	505553	505859	0.3	+	.	Target "Motif:NA_COMP13754_G1_I1" 1 307
scaffold1077_cov67	RepeatMasker	similarity	508394	508644	0.0	-	.	Target "Motif:NA_COMP39511_G1_I1" 1 251
scaffold1077_cov67	RepeatMasker	similarity	512385	512477	8.6	-	.	Target "Motif:NA_COMP3525_G3_I3" 97 195
scaffold1077_cov67	RepeatMasker	similarity	514816	515041	8.9	+	.	Target "Motif:OTHERS_COMP3255_G1_I2" 186 380
scaffold1077_cov67	RepeatMasker	similarity	520412	520729	0.0	-	.	Target "Motif:NA_COMP18270_G1_I1" 1 318
scaffold1077_cov67	RepeatMasker	similarity	521123	521198	9.2	-	.	Target "Motif:NA_COMP33832_G1_I1" 44 119
scaffold1077_cov67	RepeatMasker	similarity	521284	521682	0.0	+	.	Target "Motif:NA_COMP33832_G1_I1" 1 399
scaffold1077_cov67	RepeatMasker	similarity	522101	522321	8.3	+	.	Target "Motif:NA_COMP3392_G3_I1" 2 218
scaffold1077_cov67	RepeatMasker	similarity	524298	524506	6.9	-	.	Target "Motif:NA_COMP3593_G5_I2" 123 327
scaffold1077_cov67	RepeatMasker	similarity	525444	525781	0.0	-	.	Target "Motif:LINE_COMP10247_G1_I1" 1 338
scaffold1077_cov67	RepeatMasker	similarity	528247	528489	4.2	-	.	Target "Motif:NA_COMP3440_G3_I1" 7 247
scaffold1077_cov67	RepeatMasker	similarity	528783	529322	3.7	+	.	Target "Motif:NA_COMP3566_G4_I6" 47 562
scaffold1077_cov67	RepeatMasker	similarity	530677	530843	3.0	+	.	Target "Motif:NA_COMP3606_G15_I5" 28 194
scaffold1077_cov67	RepeatMasker	similarity	530777	530859	6.6	+	.	Target "Motif:NA_COMP3507_G2_I5" 1 76
scaffold1077_cov67	RepeatMasker	similarity	530849	531005	7.6	-	.	Target "Motif:NA_COMP3510_G5_I9" 101 263
scaffold1077_cov67	RepeatMasker	similarity	538051	538113	3.2	+	.	Target "Motif:NA_COMP3507_G2_I5" 66 134
scaffold1077_cov67	RepeatMasker	similarity	538444	538628	6.5	+	.	Target "Motif:NA_COMP3507_G2_I1" 212 396
scaffold1077_cov67	RepeatMasker	similarity	541572	541785	0.0	-	.	Target "Motif:NA_COMP48090_G1_I1" 1 214
scaffold1077_cov67	RepeatMasker	similarity	543732	544042	0.0	-	.	Target "Motif:NA_COMP29160_G1_I1" 1 311
scaffold1077_cov67	RepeatMasker	similarity	552407	552524	5.1	-	.	Target "Motif:NA_COMP37417_G1_I1" 133 272
scaffold1077_cov67	RepeatMasker	similarity	552538	552809	0.0	-	.	Target "Motif:NA_COMP37417_G1_I1" 1 272
scaffold1077_cov67	RepeatMasker	similarity	554094	554254	9.9	+	.	Target "Motif:NA_COMP3340_G2_I1" 140 300
scaffold1077_cov67	RepeatMasker	similarity	554232	554429	8.6	+	.	Target "Motif:SIMPLE_REPEAT_COMP3340_G1_I1" 153 350
scaffold1077_cov67	RepeatMasker	similarity	561103	561325	0.0	-	.	Target "Motif:NA_COMP49662_G1_I1" 1 223
scaffold1077_cov67	RepeatMasker	similarity	564764	565139	1.1	+	.	Target "Motif:NA_COMP3422_G1_I3" 139 530
scaffold1077_cov67	RepeatMasker	similarity	565149	565357	7.2	+	.	Target "Motif:SIMPLE_REPEAT_COMP3588_G5_I5" 98 293
scaffold1077_cov67	RepeatMasker	similarity	565404	565461	3.5	+	.	Target "Motif:NA_COMP3422_G1_I2" 316 373
scaffold1077_cov67	RepeatMasker	similarity	565738	566184	3.7	+	.	Target "Motif:NA_COMP5562_G1_I1" 1 435
scaffold1077_cov67	RepeatMasker	similarity	572921	573177	7.9	-	.	Target "Motif:NA_COMP3191_G2_I1" 2 254
scaffold1077_cov67	RepeatMasker	similarity	583215	583307	3.2	+	.	Target "Motif:NA_COMP3606_G15_I5" 99 197
scaffold1077_cov67	RepeatMasker	similarity	586072	586288	7.0	+	.	Target "Motif:NA_COMP3595_G5_I3" 209 429
scaffold1077_cov67	RepeatMasker	similarity	586283	586439	6.4	+	.	Target "Motif:NA_COMP3606_G15_I5" 17 198
scaffold1077_cov67	RepeatMasker	similarity	586283	586421	7.2	+	.	Target "Motif:NA_COMP3606_G15_I3" 17 162
scaffold1077_cov67	RepeatMasker	similarity	586521	586765	0.4	+	.	Target "Motif:NA_COMP14913_G1_I1" 1 245
scaffold1077_cov67	RepeatMasker	similarity	587478	587530	9.4	-	.	Target "Motif:NA_COMP20806_G1_I1" 147 199
scaffold1077_cov67	RepeatMasker	similarity	587677	587811	8.9	+	.	Target "Motif:NA_COMP26230_G1_I1" 163 297
scaffold1077_cov67	RepeatMasker	similarity	587869	588017	8.1	+	.	Target "Motif:NA_COMP26230_G1_I1" 149 297
scaffold1077_cov67	RepeatMasker	similarity	589869	590394	4.1	+	.	Target "Motif:SIMPLE_REPEAT_COMP3604_G11_I12" 76 594
scaffold1077_cov67	RepeatMasker	similarity	592686	592881	8.2	+	.	Target "Motif:NA_COMP3595_G5_I3" 255 452
scaffold1077_cov67	RepeatMasker	similarity	599714	599783	8.9	+	.	Target "Motif:NA_COMP3595_G5_I1" 445 520
scaffold1077_cov67	RepeatMasker	similarity	599728	599956	6.2	-	.	Target "Motif:NA_COMP3507_G8_I3" 28 252
scaffold1077_cov67	RepeatMasker	similarity	602821	603103	8.6	+	.	Target "Motif:NA_COMP3507_G2_I1" 142 404
[truncated: 91,078 more rows]
