# Supplementary material
Source: publisher figshare collection journal article supplement (https://gsajournals.figshare.com/ndownloader/files/13479752)
Supplement: Supplementary file 1 [file 13479752 › Nme.TE.groups.counts.txt]

     77 ?
     15 2
      7 5S
    100 Bel-Pao
    169 Copia
     16 DIRS
     45 ERV
    346 Gypsy
     11 hAT
      2 Helitron
    179 I
    111 Jockey
     63 L1
    874 Low_complexity
      2 MuDR
     33 Penelope
      2 PIF-Harbinger
     34 R2
      5 Retrovirus
     19 RTE
   4230 Simple_repeat
     12 tRNA
   1690 Unspecified
