# Supplementary material
Source: publisher figshare collection journal article supplement (https://gsajournals.figshare.com/ndownloader/files/13479752)
Supplement: Supplementary file 1 [file 13479752 › Nme.TE.RM.annotation.report.txt]

comp10002_g1_i1	497	0.10261569416498995	(GCAGC)n	Simple_repeat	51	[1-51]	0.9803921568627451
comp10004_g1_i1	445	0.08089887640449438	(ATTCATT)n	Simple_repeat	37	[1-37]	0.972972972972973
comp10010_g1_i1	848	0.02358490566037736	(TA)n	Simple_repeat	21	[1-21]	0.9523809523809523
comp10011_g1_i1	451	0.15964523281596452	Sola1-1_AC/ClassII/?/Sola	Unspecified	4097	[954-1029]	0.0183060776177691
comp10014_g1_i1	337	0.6261127596439169	Jockey-13_DBp	LINE/Jockey	3345	[1971-2106]	0.04035874439461883
comp10016_g1_i1	845	0.3940828402366864	HSMAR1/ClassII/TIR/Tc1-Mariner	Unspecified	1287	[1-334]	0.25874125874125875
comp10021_g1_i1	426	0.06572769953051644	MARWOLEN1/ClassII/TIR/Tc1-Mariner	Unspecified	1643	[1025-1053]	0.01704199634814364
comp10022_g1_i1	453	0.08609271523178808	(TAA)n	Simple_repeat	39	[1-39]	0.9743589743589743
comp10026_g1_i1	386	0.12435233160621761	(ATT)n	Simple_repeat	52	[1-52]	0.9807692307692307
comp10041_g1_i1	591	0.10998307952622674	Mariner-26_SIn/ClassII/TIR/Tc1-Mariner	Unspecified	1266	[23-89]	0.052132701421800945
comp10044_g1_i1	423	0.08747044917257683	(GTCC)n	Simple_repeat	41	[1-41]	0.975609756097561
comp10058_g1_i1	226	0.22566371681415928	(TAT)n	Simple_repeat	50	[1-50]	0.98
comp10071_g1_i1	619	0.03877221324717286	(CG)n	Simple_repeat	25	[1-25]	0.96
comp10074_g1_i1	315	0.21904761904761905	Polinton-1_ACe/ClassII/Maverick/Maverick	Unspecified	14410	[1047-1120]	0.005065926439972242
comp10075_g1_i1	283	0.13427561837455831	(GGT)n	Simple_repeat	39	[1-39]	0.9743589743589743
comp10076_g1_i1	245	0.12244897959183673	(GCG)n	Simple_repeat	30	[1-30]	0.9666666666666667
comp10089_g1_i1	259	0.1776061776061776	(CCGG)n	Simple_repeat	47	[1-47]	0.9787234042553191
comp10100_g1_i1	221	0.3212669683257919	Mariner-N5_AEc/ClassII/TIR/Tc1-Mariner	Unspecified	848	[119-191]	0.08490566037735849
comp1010_g1_i1	481	0.062370062370062374	(AGACA)n	Simple_repeat	31	[1-31]	0.967741935483871
comp10112_g1_i1	875	0.12114285714285715	(ACAG)n	Simple_repeat	111	[1-111]	0.990990990990991
comp10113_g1_i1	310	0.11612903225806452	(ATTATCA)n	Simple_repeat	38	[1-38]	0.9736842105263158
comp10126_g1_i1	381	0.17060367454068243	Mariner-N5_AEc/ClassII/TIR/Tc1-Mariner	Unspecified	848	[5-67]	0.07311320754716981
comp10132_g1_i1	442	0.10180995475113122	(GCG)n	Simple_repeat	44	[1-44]	0.9772727272727273
comp10134_g1_i1	524	0.04961832061068702	(CGCGG)n	Simple_repeat	28	[1-28]	0.9642857142857143
comp10137_g1_i1	437	0.08009153318077804	(CACATTT)n	Simple_repeat	37	[1-37]	0.972972972972973
comp1013_g1_i1	579	0.231433506044905	Mariner-34_SIn/ClassII/TIR/Tc1-Mariner	Unspecified	2185	[1-131]	0.059496567505720827
comp10141_g1_i1	249	0.09236947791164658	(CGC)n	Simple_repeat	24	[1-24]	0.9583333333333334
comp10143_g1_i1	253	0.20553359683794467	LINE1-23_SBi	LINE/L1	5126	[3985-4035]	0.009754194303550527
comp10144_g1_i1	758	0.06992084432717678	(TACAATA)n	Simple_repeat	59	[1-59]	0.9830508474576272
comp10146_g1_i1	622	0.04662379421221865	(GC)n	Simple_repeat	31	[1-31]	0.967741935483871
comp10160_g1_i1	313	0.792332268370607	Jockey-6_DPer	LINE/Jockey	7822	[5439-5524]	0.010866785988238302
comp10170_g1_i1	245	0.6244897959183674	Penelope-13_HM	PLE/Penelope	3045	[2716-2860]	0.04729064039408867
comp10175_g1_i1	261	0.2720306513409962	GA-rich	Low_complexity	73	[1-73]	0.9863013698630136
comp10180_g1_i1	203	0.1921182266009852	Gypsy-60_PIT-I	LTR/Gypsy	4830	[2659-2697]	0.007867494824016562
comp10188_g1_i1	822	0.07907542579075426	(TAA)n	Simple_repeat	67	[1-67]	0.9850746268656716
comp10197_g1_i1	460	0.14130434782608695	A-rich	Low_complexity	60	[1-60]	0.9833333333333333
comp1019_g1_i2	523	0.07648183556405354	(CTCTTTT)n	Simple_repeat	42	[1-42]	0.9761904761904762
comp101_g1_i1	412	0.2524271844660194	(AATTTAT)n	Simple_repeat	107	[1-107]	0.9906542056074766
comp10201_g1_i1	282	0.21631205673758866	Gypsy8-I_Dpse	LTR/Gypsy	7193	[6590-6645]	0.007646322813846795
comp10202_g1_i1	442	0.06787330316742081	A-rich	Low_complexity	31	[1-31]	0.967741935483871
comp10205_g1_i1	940	0.047872340425531915	(TCGGTTA)n	Simple_repeat	46	[1-46]	0.9782608695652174
comp10213_g1_i1	626	0.07188498402555911	nTc3-3_Hmel/ClassII/?/?	Unspecified	1470	[705-756]	0.03469387755102041
comp10215_g1_i1	820	0.1329268292682927	MARIN1_ML/ClassII/TIR/Tc1-Mariner	Unspecified	285	[1-112]	0.3894736842105263
comp10224_g1_i1	214	0.308411214953271	Copia-13_SI-I	LTR/Copia	4043	[509-575]	0.016324511501360377
comp10233_g1_i1	285	0.21754385964912282	Gypsy-8_ALY-I	LTR/Gypsy	9455	[7970-8028]	0.006134320465362242
comp10238_g1_i1	258	0.29069767441860467	GA-rich	Low_complexity	75	[1-75]	0.9866666666666667
comp10247_g1_i1	338	0.22485207100591717	CR1-3_HM	LINE/Jockey	4733	[4403-4478]	0.015846186351151488
comp1024_g1_i1	361	0.2409972299168975	Dada-tL_DR/ClassII/?/?	Unspecified	10407	[9818-9904]	0.008263668684539252
comp10276_g1_i1	297	0.3872053872053872	Merlin-N1_HSal/ClassII/TIR/Merlin	Unspecified	1032	[883-1001]	0.11434108527131782
comp1027_g1_i1	424	0.0660377358490566	(TTCTC)n	Simple_repeat	32	[1-32]	0.96875
comp10280_g1_i1	293	0.19795221843003413	Kolobok-N1_AEc/ClassII/?/Kolobok	Unspecified	8251	[4716-4780]	0.007756635559326142
comp10282_g1_i1	478	0.08786610878661087	(TCCTT)n	Simple_repeat	41	[1-41]	0.975609756097561
comp10284_g1_i1	592	0.05405405405405406	ERV1-1_PCa-I	LTR/ERV	7492	[7344-7375]	0.004137746930058729
comp10291_g1_i1	304	0.19407894736842105	(AATAATA)n	Simple_repeat	59	[1-59]	0.9830508474576272
comp10293_g1_i1	474	0.06118143459915612	(ATTGAA)n	Simple_repeat	32	[1-32]	0.96875
comp10294_g1_i1	262	0.4961832061068702	Mariner-N15_HSal/ClassII/TIR/Tc1-Mariner	Unspecified	2024	[1889-2022]	0.06571146245059288
comp10296_g1_i1	458	0.07423580786026202	(AATTAT)n	Simple_repeat	37	[1-37]	0.972972972972973
comp10297_g1_i1	523	0.1586998087954111	(AACGA)n	Simple_repeat	84	[1-84]	0.9880952380952381
comp10300_g1_i1	419	0.06682577565632458	(CGCT)n	Simple_repeat	29	[1-29]	0.9655172413793104
comp10308_g1_i1	391	0.08951406649616368	(AAT)n	Simple_repeat	37	[1-37]	0.972972972972973
comp10316_g1_i1	633	0.06477093206951026	(AATTTT)n	Simple_repeat	37	[1-37]	0.972972972972973
comp1031_g2_i1	290	0.14482758620689656	(TTAATA)n	Simple_repeat	40	[1-40]	0.975
comp10323_g1_i1	291	0.0859106529209622	(AATTA)n	Simple_repeat	26	[1-26]	0.9615384615384616
comp10334_g1_i1	298	0.12080536912751678	(GCGCGA)n	Simple_repeat	37	[1-37]	0.972972972972973
comp10349_g1_i1	562	0.06761565836298933	(CGTAAAC)n	Simple_repeat	41	[1-41]	0.975609756097561
comp10351_g1_i1	589	0.09847198641765705	A-rich	Low_complexity	60	[1-60]	0.9833333333333333
comp10358_g1_i1	827	0.20193470374848851	Mariner-N5_AEc/ClassII/TIR/Tc1-Mariner	Unspecified	848	[24-190]	0.1957547169811321
comp10361_g1_i1	949	0.03477344573234984	(GT)n	Simple_repeat	36	[1-36]	0.9722222222222222
comp10371_g1_i1	616	0.05194805194805195	(CAGGA)n	Simple_repeat	32	[1-32]	0.96875
comp10376_g1_i1	310	0.12258064516129032	(AATATTA)n	Simple_repeat	40	[1-40]	0.975
comp10382_g1_i1	597	0.06700167504187604	(AATAA)n	Simple_repeat	41	[1-41]	0.975609756097561
comp10386_g1_i1	434	0.06682027649769585	(AATCGT)n	Simple_repeat	31	[1-31]	0.967741935483871
comp1039_g1_i1	424	0.35377358490566035	DNA-like-1_Hmel/ClassII/?/?	Unspecified	248	[6-158]	0.6129032258064516
comp10419_g1_i1	343	0.7521865889212828	BEL-3-I_NVi	LTR/Bel-Pao	5597	[749-818]	0.012328032874754332
comp1041_g1_i1	333	0.14114114114114115	DNA-like-1_Hmel/ClassII/?/?	Unspecified	248	[4-52]	0.1935483870967742
comp10420_g1_i1	322	0.11490683229813664	(CGGTT)n	Simple_repeat	39	[1-39]	0.9743589743589743
comp10425_g1_i1	324	0.07098765432098765	(TAAA)n	Simple_repeat	24	[1-24]	0.9583333333333334
comp10427_g1_i1	379	0.10554089709762533	(TC)n	Simple_repeat	41	[1-41]	0.975609756097561
comp10439_g1_i1	306	0.14705882352941177	(GTCGG)n	Simple_repeat	46	[1-46]	0.9782608695652174
comp10450_g1_i1	634	0.05993690851735016	(AATTTAA)n	Simple_repeat	40	[1-40]	0.975
comp10455_g1_i1	544	0.0625	(ATA)n	Simple_repeat	37	[1-37]	0.972972972972973
comp10457_g1_i1	244	0.09016393442622951	(CGAA)n	Simple_repeat	23	[1-23]	0.9565217391304348
comp1045_g1_i1	205	0.22926829268292684	piggyBac-10_SM/ClassII/TIR/PiggyBac	Unspecified	2648	[10-58]	0.01812688821752266
comp10466_g1_i1	575	0.07130434782608695	A-rich	Low_complexity	43	[1-43]	0.9767441860465116
comp10472_g1_i1	773	0.8305304010349288	Mariner-14_AEc/ClassII/TIR/Tc1-Mariner	Unspecified	1310	[90-724]	0.48396946564885496
comp10474_g1_i1	252	0.9285714285714286	Polinton-4_PBa/ClassII/Maverick/Maverick	Unspecified	15965	[5289-5529]	0.015032884434700909
comp10476_g1_i1	371	0.07816711590296496	(ATCG)n	Simple_repeat	30	[1-30]	0.9666666666666667
comp10483_g1_i1	461	0.0911062906724512	A-rich	Low_complexity	45	[1-45]	0.9777777777777777
comp10485_g1_i1	380	0.11315789473684211	(TTTTA)n	Simple_repeat	44	[1-44]	0.9772727272727273
comp10491_g1_i1	671	0.05216095380029806	(TTTTATA)n	Simple_repeat	37	[1-37]	0.972972972972973
comp10496_g1_i1	521	0.11324376199616124	(AGAGAGAC)n	Simple_repeat	68	[1-68]	0.9852941176470589
comp10497_g1_i1	331	0.19637462235649547	(TATTA)n	Simple_repeat	69	[1-69]	0.9855072463768116
comp104_g1_i1	631	0.07290015847860538	(CCT)n	Simple_repeat	49	[1-49]	0.9795918367346939
comp10506_g1_i1	261	0.13409961685823754	A-rich	Low_complexity	38	[1-38]	0.9736842105263158
comp10508_g1_i1	531	0.3032015065913371	hAT-2_AP/ClassII/TIR/hAT	Unspecified	3473	[2937-3070]	0.038295421825511086
comp10511_g1_i1	320	0.090625	(CGTTT)n	Simple_repeat	30	[1-30]	0.9666666666666667
comp10518_g1_i1	302	0.2185430463576159	A-rich	Low_complexity	68	[1-68]	0.9852941176470589
comp10531_g1_i1	316	0.1550632911392405	Mariner-31_HSal/ClassII/TIR/Tc1-Mariner	Unspecified	1276	[1091-1141]	0.03918495297805643
comp10539_g1_i1	509	0.10609037328094302	GA-rich	Low_complexity	55	[1-55]	0.9818181818181818
comp10542_g1_i1	496	0.11290322580645161	piggyBac-10_SM/ClassII/TIR/PiggyBac	Unspecified	2648	[1-58]	0.02152567975830816
comp10558_g1_i1	255	0.2196078431372549	GA-rich	Low_complexity	57	[1-57]	0.9824561403508771
comp10565_g1_i1	317	0.5488958990536278	Mariner-26_SIn/ClassII/TIR/Tc1-Mariner	Unspecified	1266	[930-1091]	0.12717219589257503
comp10567_g1_i1	646	0.35139318885448917	Gypsy-24_DEl-I	LTR/Gypsy	6148	[2608-2822]	0.034808067664281066
comp10568_g1_i1	272	0.16544117647058823	(TTGAT)n	Simple_repeat	46	[1-46]	0.9782608695652174
comp10573_g1_i1	1201	0.042464612822647796	(AAT)n	Simple_repeat	51	[1-51]	0.9803921568627451
comp10574_g1_i1	432	0.09722222222222222	(ATTAATT)n	Simple_repeat	41	[1-41]	0.975609756097561
comp10579_g1_i1	313	0.13738019169329074	(TTGT)n	Simple_repeat	42	[1-42]	0.9761904761904762
comp10586_g1_i1	511	0.09001956947162426	(CAG)n	Simple_repeat	47	[1-47]	0.9787234042553191
comp1058_g1_i1	408	0.2647058823529412	Mariner-74_HSal/ClassII/TIR/Tc1-Mariner	Unspecified	1295	[1187-1295]	0.0833976833976834
comp1058_g1_i2	293	0.3447098976109215	Mariner-74_HSal/ClassII/TIR/Tc1-Mariner	Unspecified	1295	[1187-1288]	0.077992277992278
comp10599_g1_i1	309	0.06796116504854369	(GA)n	Simple_repeat	22	[1-22]	0.9545454545454546
comp10611_g1_i1	309	0.13592233009708737	(GCGAGC)n	Simple_repeat	43	[1-43]	0.9767441860465116
comp10636_g1_i1	281	0.20640569395017794	(CTT)n	Simple_repeat	60	[1-60]	0.9833333333333333
comp10638_g1_i1	284	0.0880281690140845	(CTT)n	Simple_repeat	27	[1-27]	0.9629629629629629
comp10643_g1_i1	302	0.06622516556291391	(GA)n	Simple_repeat	21	[1-21]	0.9523809523809523
comp10646_g1_i1	376	0.05851063829787234	(CCTC)n	Simple_repeat	23	[1-23]	0.9565217391304348
comp10660_g1_i1	257	0.1245136186770428	(TTTCAA)n	Simple_repeat	35	[1-35]	0.9714285714285714
comp10675_g1_i1	268	0.10074626865671642	(CTG)n	Simple_repeat	27	[1-27]	0.9629629629629629
comp10676_g1_i1	260	0.15384615384615385	(CTCTCC)n	Simple_repeat	41	[1-41]	0.975609756097561
comp10677_g1_i1	257	0.10894941634241245	GA-rich	Low_complexity	29	[1-29]	0.9655172413793104
comp10680_g1_i1	338	0.34911242603550297	Gypsy-7_LH-I	LTR/Gypsy	4707	[1005-1119]	0.024219247928616953
comp10683_g1_i1	308	0.08766233766233766	G-rich	Low_complexity	28	[1-28]	0.9642857142857143
comp10685_g1_i1	439	0.44646924829157175	HSMAR1/ClassII/TIR/Tc1-Mariner	Unspecified	1287	[1091-1287]	0.1522921522921523
comp10690_g1_i1	253	0.30434782608695654	A-rich	Low_complexity	71	[1-71]	0.9859154929577465
comp10695_g1_i1	297	0.09427609427609428	(TATAT)n	Simple_repeat	29	[1-29]	0.9655172413793104
comp10701_g1_i1	886	0.05417607223476298	(ATATGT)n	Simple_repeat	51	[1-51]	0.9803921568627451
comp10704_g1_i1	261	0.1839080459770115	(GACGAAG)n	Simple_repeat	47	[1-47]	0.9787234042553191
comp10706_g1_i1	269	0.12639405204460966	Mariner-7_LCh/ClassII/TIR/Tc1-Mariner	Unspecified	2437	[5-39]	0.013951579811243332
comp10714_g1_i1	515	0.1650485436893204	(TTTGAGG)n	Simple_repeat	85	[1-85]	0.9882352941176471
comp10716_g1_i1	453	0.09492273730684327	LINE-1_AA	LINE/Jockey	4709	[2264-2307]	0.009131450414100658
comp10754_g1_i1	978	0.05214723926380368	(ATTA)n	Simple_repeat	51	[1-51]	0.9803921568627451
comp10756_g1_i1	283	0.15547703180212014	(TATATTG)n	Simple_repeat	46	[1-46]	0.9782608695652174
comp10763_g1_i1	256	0.15625	TTAA13_AP/ClassII/?/?	Unspecified	574	[420-460]	0.06968641114982578
comp10767_g1_i1	343	0.08163265306122448	(GCG)n	Simple_repeat	29	[1-29]	0.9655172413793104
comp10802_g1_i1	428	0.1378504672897196	Academ-1_Lgigantea/ClassII/?/Academ	Unspecified	6437	[35-90]	0.00854435295945316
comp10805_g1_i1	573	0.5340314136125655	piggyBac-13_SM/ClassII/TIR/PiggyBac	Unspecified	2554	[1154-1625]	0.18441660140955365
comp10806_g1_i1	288	0.28125	Mariner-N6_HSal/ClassII/TIR/Tc1-Mariner	Unspecified	1070	[138-221]	0.07757009345794393
comp10812_g1_i1	414	0.1280193236714976	ENSPM-6_DR/ClassII/TIR/CACTA	Unspecified	32616	[28314-28367]	0.0016249693402011283
comp10830_g1_i1	604	0.057947019867549666	(TATTTA)n	Simple_repeat	35	[1-35]	0.9714285714285714
comp10846_g1_i1	734	0.04223433242506812	(AAGTTC)n	Simple_repeat	33	[1-33]	0.9696969696969697
comp10850_g1_i1	735	0.06258503401360545	(AAT)n	Simple_repeat	44	[1-44]	0.9772727272727273
comp10856_g1_i1	391	0.6649616368286445	RPS2	?/?	1051	[448-708]	0.24738344433872503
comp10858_g1_i1	213	0.1643192488262911	(GATA)n	Simple_repeat	36	[1-36]	0.9722222222222222
comp10860_g1_i1	709	0.07757404795486601	Daphne-25_LMi	LINE/Jockey	4317	[1896-1951]	0.012740328932128793
comp10862_g1_i1	551	0.0925589836660617	(ATTTA)n	Simple_repeat	53	[1-53]	0.9811320754716981
comp10865_g1_i1	286	0.13986013986013987	(CGCGAT)n	Simple_repeat	42	[1-42]	0.9761904761904762
comp10885_g1_i1	345	0.06666666666666667	(AG)n	Simple_repeat	24	[1-24]	0.9583333333333334
comp10886_g1_i1	397	0.0982367758186398	A-rich	Low_complexity	38	[1-38]	0.9736842105263158
comp10896_g1_i1	264	0.3446969696969697	(ATTTTT)n	Simple_repeat	94	[1-94]	0.9893617021276596
comp10897_g1_i1	235	0.2297872340425532	(AGTAAT)n	Simple_repeat	58	[1-58]	0.9827586206896551
comp1091_g1_i1	574	0.078397212543554	Mariner-34_SIn/ClassII/TIR/Tc1-Mariner	Unspecified	3900	[4-49]	0.011538461538461539
comp1091_g1_i2	357	0.2605042016806723	Mariner-34_SIn/ClassII/TIR/Tc1-Mariner	Unspecified	1191	[1-94]	0.07808564231738035
comp1092_g1_i1	529	0.3780718336483932	Mariner-13_AEc/ClassII/TIR/Tc1-Mariner	Unspecified	1300	[179-380]	0.15461538461538463
comp1092_g1_i2	250	0.82	Mariner-13_AEc/ClassII/TIR/Tc1-Mariner	Unspecified	1300	[179-385]	0.15846153846153846
comp1093_g1_i1	580	0.9879310344827587	BEL-7_CQ-I	LTR/Bel-Pao	6427	[4982-5656]	0.10487007935273067
comp10943_g1_i1	386	0.07253886010362694	(TATGT)n	Simple_repeat	33	[1-33]	0.9696969696969697
comp10945_g1_i1	365	0.1095890410958904	(ATTT)n	Simple_repeat	40	[1-40]	0.975
comp10947_g1_i1	287	0.1289198606271777	(TTA)n	Simple_repeat	38	[1-38]	0.9736842105263158
comp10948_g1_i1	286	0.14685314685314685	hAT-50_HM/ClassII/TIR/hAT	Unspecified	5247	[1223-1261]	0.0072422336573279966
comp10955_g1_i1	521	0.2399232245681382	piggyBac-1_BM/ClassII/TIR/PiggyBac	Unspecified	2588	[1781-2014]	0.09003091190108192
comp10961_g1_i1	303	0.1353135313531353	(TA)n	Simple_repeat	41	[1-41]	0.975609756097561
comp10968_g1_i1	307	0.1758957654723127	(GTAAT)n	Simple_repeat	53	[1-53]	0.9811320754716981
comp10973_g1_i1	397	0.21662468513853905	(CGTGCT)n	Simple_repeat	84	[1-84]	0.9880952380952381
comp10974_g1_i1	307	0.1986970684039088	piggyBac-N1_DWil/ClassII/TIR/PiggyBac	Unspecified	658	[1-60]	0.08966565349544073
comp10983_g1_i1	487	0.20739219712525667	Mariner-N5_HSal/ClassII/TIR/Tc1-Mariner	Unspecified	1540	[1072-1184]	0.07272727272727272
comp10985_g1_i1	416	0.08413461538461539	A-rich	Low_complexity	38	[1-38]	0.9736842105263158
comp10991_g1_i1	419	0.08591885441527446	Mariner-10_HSal/ClassII/TIR/Tc1-Mariner	Unspecified	1290	[952-988]	0.027906976744186046
comp10995_g1_i1	268	0.15298507462686567	(TAA)n	Simple_repeat	44	[1-44]	0.9772727272727273
comp1099_g1_i1	703	0.06970128022759602	(TTTACTACA)n	Simple_repeat	55	[1-55]	0.9818181818181818
comp1099_g1_i2	290	0.16896551724137931	(TTTACTACA)n	Simple_repeat	55	[1-55]	0.9818181818181818
comp1100_g1_i1	244	0.19672131147540983	Mariner3-3_HSal/ClassII/TIR/Tc1-Mariner	Unspecified	4187	[163-211]	0.011464055409601147
comp1100_g1_i2	257	0.2529182879377432	Mariner3-3_HSal/ClassII/TIR/Tc1-Mariner	Unspecified	4187	[163-212]	0.01170288989730117
comp11013_g1_i1	277	0.11913357400722022	(AATTAT)n	Simple_repeat	35	[1-35]	0.9714285714285714
comp11014_g1_i1	535	0.07663551401869159	GA-rich	Low_complexity	44	[1-44]	0.9772727272727273
comp11018_g1_i1	299	0.2140468227424749	Proto2-1_SK	LINE/RTE	4384	[2092-2156]	0.014598540145985401
comp11020_g1_i1	409	0.21271393643031786	LTR49_MD	LTR/ERV	899	[679-765]	0.09566184649610679
comp11021_g1_i1	379	0.05804749340369393	(AG)n	Simple_repeat	23	[1-23]	0.9565217391304348
comp11029_g1_i1	347	0.05187319884726225	(A)n	Simple_repeat	19	[1-19]	0.9473684210526315
comp11030_g1_i1	294	0.22789115646258504	Copia-28_BD-I	LTR/Copia	4201	[857-923]	0.015710545108307546
comp11033_g1_i1	1194	0.04020100502512563	(GCC)n	Simple_repeat	47	[1-47]	0.9787234042553191
comp11035_g1_i1	533	0.13133208255159476	(ATCTTTT)n	Simple_repeat	68	[1-68]	0.9852941176470589
comp11039_g1_i1	1006	0.02186878727634195	(C)n	Simple_repeat	23	[1-23]	0.9565217391304348
comp11040_g1_i1	256	0.3046875	Gypsy-57_DWil-I	LTR/Gypsy	5721	[227-309]	0.014333158538717007
comp1104_g1_i1	210	0.2904761904761905	(TTA)n	Simple_repeat	58	[1-58]	0.9827586206896551
comp11052_g1_i1	641	0.078003120124805	(ACATC)n	Simple_repeat	51	[1-51]	0.9803921568627451
comp11066_g1_i1	301	0.15946843853820597	(TTATTT)n	Simple_repeat	48	[1-48]	0.9791666666666666
comp11074_g1_i1	323	0.5634674922600619	Mariner-N17_HSal/ClassII/TIR/Tc1-Mariner	Unspecified	1075	[685-858]	0.16093023255813954
comp11081_g1_i1	365	0.2684931506849315	A-rich	Low_complexity	96	[1-96]	0.9895833333333334
comp11083_g1_i1	413	0.06053268765133172	(TTTA)n	Simple_repeat	27	[1-27]	0.9629629629629629
comp11099_g1_i1	278	0.09712230215827339	(TG)n	Simple_repeat	29	[1-29]	0.9655172413793104
comp110_g1_i1	239	0.28451882845188287	(TTTTGC)n	Simple_repeat	66	[1-66]	0.9848484848484849
comp11102_g1_i1	429	0.10023310023310024	I-1_AA	LINE/I	5258	[543-586]	0.008178014454165081
comp11120_g1_i1	244	0.2459016393442623	piggyBac-10_SM/ClassII/TIR/PiggyBac	Unspecified	2648	[2588-2648]	0.022658610271903322
comp11123_g1_i1	263	0.07984790874524715	(TA)n	Simple_repeat	22	[1-22]	0.9545454545454546
comp11131_g1_i1	281	0.08896797153024912	(TTAA)n	Simple_repeat	27	[1-27]	0.9629629629629629
comp11146_g1_i1	685	0.049635036496350364	BEL-7_CGi-LTR	LTR/Bel-Pao	573	[183-218]	0.06108202443280977
comp11151_g1_i1	411	0.0535279805352798	(AGG)n	Simple_repeat	23	[1-23]	0.9565217391304348
comp11158_g1_i1	410	0.11219512195121951	(CAC)n	Simple_repeat	44	[1-44]	0.9772727272727273
comp11178_g1_i1	545	0.09174311926605505	(TAATT)n	Simple_repeat	50	[1-50]	0.98
comp11186_g1_i1	533	0.13133208255159476	(TAATTA)n	Simple_repeat	69	[1-69]	0.9855072463768116
comp1119_g1_i1	366	0.3524590163934426	hAT-N144_DR/ClassII/TIR/hAT	Unspecified	17446	[4930-5041]	0.0063624899690473465
comp1119_g2_i1	214	0.4392523364485981	Mariner-N29_DR/ClassII/TIR/Tc1-Mariner	Unspecified	1765	[1044-1120]	0.04305949008498584
comp11202_g1_i1	343	0.16909620991253643	A-rich	Low_complexity	59	[1-59]	0.9830508474576272
comp11203_g1_i1	412	0.13106796116504854	(TTATAT)n	Simple_repeat	56	[1-56]	0.9821428571428571
comp11204_g1_i1	456	0.04824561403508772	(TTC)n	Simple_repeat	23	[1-23]	0.9565217391304348
comp11206_g1_i1	447	0.08277404921700224	hAT-N54_DR/ClassII/TIR/hAT	Unspecified	1689	[1445-1483]	0.022498519834221433
comp11207_g1_i1	405	0.07407407407407407	(TATT)n	Simple_repeat	31	[1-31]	0.967741935483871
comp1121_g1_i1	615	0.055284552845528454	BEL-77_CQ-I	LTR/Bel-Pao	7137	[5259-5299]	0.005604595768530195
comp11240_g1_i1	239	0.12552301255230125	(GA)n	Simple_repeat	31	[1-31]	0.967741935483871
comp1124_g1_i1	401	0.10224438902743142	(ATAG)n	Simple_repeat	41	[1-41]	0.975609756097561
comp11250_g1_i1	382	0.08115183246073299	A-rich	Low_complexity	34	[1-34]	0.9705882352941176
comp11255_g1_i1	723	0.07192254495159059	GA-rich	Low_complexity	49	[1-49]	0.9795918367346939
comp11264_g1_i1	272	0.13602941176470587	(TATAAT)n	Simple_repeat	38	[1-38]	0.9736842105263158
comp11272_g1_i1	255	0.2784313725490196	(ATTATAA)n	Simple_repeat	74	[1-74]	0.9864864864864865
comp11276_g1_i1	288	0.13194444444444445	(TAAT)n	Simple_repeat	40	[1-40]	0.975
comp11289_g1_i1	1021	0.9892262487757101	Gypsy-21_LH-I	LTR/Gypsy	4638	[1869-3201]	0.2871927554980595
comp11294_g1_i1	961	0.055150884495317375	LINE1-58_SBi	LINE/L1	7672	[4910-4967]	0.0074296141814389986
comp11300_g1_i1	312	0.20512820512820512	(CTT)n	Simple_repeat	67	[1-67]	0.9850746268656716
comp11308_g1_i1	652	0.4539877300613497	Mariner-2_DEu/ClassII/TIR/Tc1-Mariner	Unspecified	1670	[681-977]	0.17724550898203592
comp11313_g1_i1	258	0.14728682170542637	(AAT)n	Simple_repeat	39	[1-39]	0.9743589743589743
comp11319_g1_i1	552	0.11775362318840579	(ACC)n	Simple_repeat	63	[1-63]	0.9841269841269841
comp11322_g1_i1	272	0.4007352941176471	Mariner-15_SIn/ClassII/TIR/Tc1-Mariner	Unspecified	2688	[369-549]	0.06696428571428571
comp11324_g1_i1	232	0.46120689655172414	Mariner-N35_HSal/ClassII/TIR/Tc1-Mariner	Unspecified	556	[454-526]	0.12949640287769784
comp11325_g1_i1	613	0.0799347471451876	(AATTATG)n	Simple_repeat	52	[1-52]	0.9807692307692307
comp11337_g1_i1	268	0.13432835820895522	(TAT)n	Simple_repeat	35	[1-35]	0.9714285714285714
comp11339_g1_i1	286	0.14685314685314685	(AAT)n	Simple_repeat	44	[1-44]	0.9772727272727273
comp11342_g1_i1	255	0.3215686274509804	(TTA)n	Simple_repeat	78	[1-78]	0.9871794871794872
comp1134_g1_i1	333	0.15015015015015015	Merlin-1_PBa/ClassII/TIR/Merlin	Unspecified	2116	[17-67]	0.023629489603024575
comp11356_g1_i1	276	0.09782608695652174	(TAA)n	Simple_repeat	28	[1-28]	0.9642857142857143
comp11364_g1_i1	795	0.0830188679245283	A-rich	Low_complexity	68	[1-68]	0.9852941176470589
comp1137_g1_i1	286	0.6783216783216783	Mariner-N15_HSal/ClassII/TIR/Tc1-Mariner	Unspecified	2024	[1870-2024]	0.07608695652173914
comp11380_g1_i1	523	0.040152963671128104	(AT)n	Simple_repeat	22	[1-22]	0.9545454545454546
comp11380_g2_i1	500	0.044	(TTTA)n	Simple_repeat	22	[1-22]	0.9545454545454546
comp11382_g1_i1	327	0.3547400611620795	Dada-tA_DR/ClassII/?/?	Unspecified	8672	[8191-8281]	0.010378228782287823
comp11386_g1_i1	1019	0.06084396467124632	(AT)n	Simple_repeat	68	[1-68]	0.9852941176470589
comp11386_g1_i2	1176	0.058673469387755105	(AT)n	Simple_repeat	72	[1-72]	0.9861111111111112
comp11396_g1_i1	650	0.14	DNA-2_AEc/ClassII/?/?	Unspecified	953	[2-92]	0.0944386149003148
comp11398_g1_i1	386	0.20207253886010362	(TAT)n	Simple_repeat	79	[1-79]	0.9873417721518988
comp11404_g1_i1	666	0.20270270270270271	(ATTT)n	Simple_repeat	130	[1-130]	0.9923076923076923
comp11420_g1_i1	702	0.0754985754985755	Daphne-7_HMM	LINE/Jockey	3590	[3221-3274]	0.014763231197771587
comp11424_g1_i1	250	0.184	(GATG)n	Simple_repeat	47	[1-47]	0.9787234042553191
comp11425_g1_i1	403	0.13647642679900746	A-rich	Low_complexity	56	[1-56]	0.9821428571428571
comp1142_g1_i2	500	0.09	Kolobok-N1_AEc/ClassII/?/Kolobok	Unspecified	8251	[4713-4758]	0.005453884377651194
comp11430_g1_i1	357	0.11204481792717087	(AATAT)n	Simple_repeat	42	[1-42]	0.9761904761904762
comp11434_g1_i1	252	0.1388888888888889	(CTGTCT)n	Simple_repeat	37	[1-37]	0.972972972972973
comp11447_g1_i1	434	0.20276497695852536	Rehavkus-2_NVi/ClassII/TIR/MuDR	Unspecified	9132	[3212-3300]	0.009636443276390714
comp11458_g1_i1	347	0.2680115273775216	(ATATTTA)n	Simple_repeat	87	[1-87]	0.9885057471264368
comp11472_g1_i1	800	0.06125	(TAT)n	Simple_repeat	50	[1-50]	0.98
comp11480_g1_i1	511	0.10567514677103718	Homo6/ClassII/TIR/hAT	Unspecified	3722	[848-898]	0.013433637829124127
comp11483_g1_i1	251	0.04780876494023904	hAT-30N1_DR/ClassII/TIR/hAT	Unspecified	2033	[1312-1376]	0.03148057058534186
comp11484_g1_i1	524	0.09732824427480916	(AATGATT)n	Simple_repeat	50	[1-50]	0.98
comp11485_g1_i1	946	0.2040169133192389	Mariner-89_HSal/ClassII/TIR/Tc1-Mariner	Unspecified	1605	[1035-1234]	0.12398753894080997
comp11497_g1_i1	619	0.05331179321486268	(AATTTC)n	Simple_repeat	34	[1-34]	0.9705882352941176
comp1149_g1_i1	292	0.7842465753424658	Copia-27_GM-I	LTR/Copia	3940	[2436-2614]	0.04517766497461929
comp1149_g1_i2	505	0.5425742574257426	Copia-27_GM-I	LTR/Copia	4226	[2416-2945]	0.1251774727875059
comp11502_g1_i1	272	0.1213235294117647	(TC)n	Simple_repeat	34	[1-34]	0.9705882352941176
comp11508_g1_i1	717	0.04881450488145049	(AATCG)n	Simple_repeat	36	[1-36]	0.9722222222222222
comp11510_g1_i1	204	0.17647058823529413	(CTT)n	Simple_repeat	37	[1-37]	0.972972972972973
comp11514_g1_i1	543	0.07550644567219153	R1-1_DVi	LINE/I	5178	[3746-3787]	0.007918115102356122
comp11526_g1_i1	406	0.06896551724137931	(TTA)n	Simple_repeat	30	[1-30]	0.9666666666666667
comp11532_g1_i1	245	0.13877551020408163	piggyBac-N1_HSal/ClassII/TIR/PiggyBac	Unspecified	745	[710-745]	0.04697986577181208
comp11537_g1_i1	328	0.3079268292682927	SART-1_CF	LINE/I	6969	[2528-2630]	0.014636246233318984
comp11545_g1_i1	416	0.125	Gypsy-42_MLP-I	LTR/Gypsy	6026	[2072-2125]	0.008795220710255559
comp11547_g1_i1	535	0.11775700934579439	L1-1_ALy	LINE/L1	6691	[1612-1670]	0.008668360484232552
comp11556_g1_i1	411	0.09732360097323602	(TATT)n	Simple_repeat	40	[1-40]	0.975
comp11560_g1_i1	1017	0.032448377581120944	(ATGTAAC)n	Simple_repeat	36	[1-36]	0.9722222222222222
comp11564_g1_i1	442	0.12895927601809956	(AATATTG)n	Simple_repeat	55	[1-55]	0.9818181818181818
comp11568_g1_i1	265	0.9622641509433962	Copia-10_LH-I	LTR/Copia	4156	[1785-2037]	0.06063522617901829
comp1156_g1_i2	694	0.06772334293948126	(AAT)n	Simple_repeat	51	[1-51]	0.9803921568627451
comp11583_g1_i1	468	0.11965811965811966	(ATAT)n	Simple_repeat	56	[1-56]	0.9821428571428571
comp11591_g1_i1	251	0.08366533864541832	(AG)n	Simple_repeat	23	[1-23]	0.9565217391304348
comp11594_g1_i1	277	0.22743682310469315	5S_CPo	SINE/5S	135	[60-120]	0.4444444444444444
comp11601_g1_i1	420	0.14047619047619048	GA-rich	Low_complexity	61	[1-61]	0.9836065573770492
comp1160_g2_i1	619	0.12924071082390953	Kolobok-N1_AEc/ClassII/?/Kolobok	Unspecified	8251	[4685-4756]	0.008605017573627438
comp11611_g1_i1	398	0.08793969849246232	Kolobok-N1_DAn/ClassII/?/Kolobok	Unspecified	726	[520-556]	0.049586776859504134
comp11619_g1_i1	623	0.10272873194221509	(TTATAA)n	Simple_repeat	64	[1-64]	0.984375
comp11620_g1_i1	267	0.08239700374531835	(GTG)n	Simple_repeat	23	[1-23]	0.9565217391304348
comp11631_g1_i1	474	0.04430379746835443	(CT)n	Simple_repeat	22	[1-22]	0.9545454545454546
comp11632_g1_i2	399	0.09774436090225563	(ATCGA)n	Simple_repeat	39	[1-39]	0.9743589743589743
comp11634_g1_i1	415	0.13975903614457832	(TATCTAG)n	Simple_repeat	59	[1-59]	0.9830508474576272
comp11635_g1_i1	350	0.10285714285714286	(AAACGAG)n	Simple_repeat	38	[1-38]	0.9736842105263158
comp1163_g2_i1	614	0.1254071661237785	Mariner-N15_HSal/ClassII/TIR/Tc1-Mariner	Unspecified	2024	[1-78]	0.03804347826086957
comp11647_g1_i1	547	0.11151736745886655	piggyBac-N1_DWil/ClassII/TIR/PiggyBac	Unspecified	658	[1-60]	0.08966565349544073
comp1164_g1_i1	558	0.33691756272401435	Mariner-13_AEc/ClassII/TIR/Tc1-Mariner	Unspecified	1300	[202-403]	0.15461538461538463
comp11660_g1_i1	243	0.08641975308641975	(G)n	Simple_repeat	22	[1-22]	0.9545454545454546
comp1166_g1_i1	414	0.12560386473429952	(ATAG)n	Simple_repeat	55	[1-55]	0.9818181818181818
comp11680_g1_i1	347	0.23054755043227665	(TCTT)n	Simple_repeat	79	[1-79]	0.9873417721518988
comp11689_g1_i1	236	0.2627118644067797	piggyBac-N1_DWil/ClassII/TIR/PiggyBac	Unspecified	658	[1-61]	0.0911854103343465
comp11690_g1_i1	536	0.06716417910447761	(TGAAT)n	Simple_repeat	39	[1-39]	0.9743589743589743
comp11694_g1_i1	396	0.08585858585858586	(TGTTGC)n	Simple_repeat	35	[1-35]	0.9714285714285714
comp11701_g1_i1	406	0.05172413793103448	(GA)n	Simple_repeat	22	[1-22]	0.9545454545454546
comp11703_g1_i1	292	0.2910958904109589	(ATTGATG)n	Simple_repeat	86	[1-86]	0.9883720930232558
comp11708_g1_i1	609	0.06568144499178982	GA-rich	Low_complexity	42	[1-42]	0.9761904761904762
comp11719_g1_i1	263	0.07224334600760456	(AG)n	Simple_repeat	20	[1-20]	0.95
comp11725_g1_i1	234	0.21794871794871795	(ATTTA)n	Simple_repeat	54	[1-54]	0.9814814814814815
comp11728_g1_i1	674	0.09643916913946587	Kolobok-N9_DR/ClassII/?/Kolobok	Unspecified	1639	[961-1029]	0.04148871262965223
comp11743_g1_i1	478	0.15271966527196654	(TGTATAT)n	Simple_repeat	75	[1-75]	0.9866666666666667
comp11755_g1_i1	422	0.26066350710900477	hAT-N134_DR/ClassII/TIR/hAT	Unspecified	1065	[494-604]	0.10328638497652583
comp11756_g1_i1	404	0.1485148514851485	EnSpm-1B_ALy/ClassII/TIR/CACTA	Unspecified	8056	[2360-2423]	0.00782025819265144
comp1175_g1_i1	468	0.10683760683760683	GA-rich	Low_complexity	53	[1-53]	0.9811320754716981
comp11777_g1_i1	412	0.08009708737864078	A-rich	Low_complexity	35	[1-35]	0.9714285714285714
comp11781_g1_i1	286	0.08041958041958042	(TGCG)n	Simple_repeat	24	[1-24]	0.9583333333333334
comp11786_g1_i1	387	0.10852713178294573	piggyBac-N1_HSal/ClassII/TIR/PiggyBac	Unspecified	745	[703-745]	0.056375838926174496
comp11793_g1_i1	551	0.16515426497277677	hAT-26_SM/ClassII/TIR/hAT	Unspecified	3040	[1-90]	0.029276315789473685
comp11798_g1_i1	456	0.09429824561403509	GA-rich	Low_complexity	43	[1-43]	0.9767441860465116
comp11806_g1_i1	395	0.05822784810126582	(TC)n	Simple_repeat	24	[1-24]	0.9583333333333334
comp1180_g1_i1	412	0.09223300970873786	A-rich	Low_complexity	37	[1-37]	0.972972972972973
comp11815_g1_i1	312	0.09294871794871795	(TATA)n	Simple_repeat	30	[1-30]	0.9666666666666667
comp11820_g1_i1	410	0.22682926829268293	Ginger1-6_HM/ClassII/?/Ginger1	Unspecified	5214	[1328-1423]	0.01822017644802455
comp11825_g1_i1	369	0.08943089430894309	A-rich	Low_complexity	34	[1-34]	0.9705882352941176
comp11850_g1_i1	666	0.1021021021021021	(TC)n	Simple_repeat	72	[1-72]	0.9861111111111112
comp11864_g1_i1	359	0.1309192200557103	(TTTTA)n	Simple_repeat	48	[1-48]	0.9791666666666666
comp11883_g1_i1	546	0.4945054945054945	DNA8-15_CQ/ClassII/?/?	Unspecified	2364	[644-915]	0.11463620981387479
comp11892_g1_i1	336	0.12797619047619047	GA-rich	Low_complexity	43	[1-43]	0.9767441860465116
comp11906_g1_i1	489	0.12474437627811862	L1-97_Cis	LINE/L1	5116	[1987-2040]	0.01035965598123534
comp11912_g1_i1	488	0.14754098360655737	(TAATT)n	Simple_repeat	74	[1-74]	0.9864864864864865
comp11913_g1_i1	297	0.13468013468013468	(AGCG)n	Simple_repeat	43	[1-43]	0.9767441860465116
comp11917_g1_i1	497	0.04225352112676056	(ATAC)n	Simple_repeat	22	[1-22]	0.9545454545454546
comp11928_g1_i1	430	0.09767441860465116	(AATTAT)n	Simple_repeat	45	[1-45]	0.9777777777777777
comp11930_g1_i1	299	0.3612040133779264	DNA8-12_CB/ClassII/?/?	Unspecified	2733	[1816-1967]	0.055250640321990487
comp11952_g1_i1	651	0.31643625192012287	GA-rich	Low_complexity	200	[1-200]	0.995
comp11956_g1_i1	454	0.09030837004405286	Gypsy-74_PM-I	LTR/Gypsy	5554	[4192-4233]	0.007382066978754051
comp11960_g1_i1	368	0.14130434782608695	(CTCT)n	Simple_repeat	58	[1-58]	0.9827586206896551
comp11976_g1_i1	488	0.0778688524590164	GA-rich	Low_complexity	39	[1-39]	0.9743589743589743
comp11976_g2_i1	275	0.10909090909090909	(AG)n	Simple_repeat	31	[1-31]	0.967741935483871
comp11981_g1_i1	321	0.1277258566978193	(TAATTAA)n	Simple_repeat	44	[1-44]	0.9772727272727273
comp1198_g1_i1	546	0.08058608058608059	(TTAAA)n	Simple_repeat	46	[1-46]	0.9782608695652174
comp1198_g1_i2	436	0.10091743119266056	(TTAAA)n	Simple_repeat	46	[1-46]	0.9782608695652174
comp12000_g1_i1	267	0.22846441947565543	(GACTC)n	Simple_repeat	64	[1-64]	0.984375
comp12004_g1_i1	373	0.13136729222520108	(ATATGT)n	Simple_repeat	50	[1-50]	0.98
comp12005_g1_i1	283	0.07773851590106007	(GA)n	Simple_repeat	23	[1-23]	0.9565217391304348
comp12006_g1_i1	293	0.20136518771331058	BEL1-LTR_SM	LTR/Bel-Pao	737	[393-452]	0.08005427408412483
comp12012_g1_i1	257	0.1556420233463035	EnSpm-16_OS/ClassII/TIR/CACTA	Unspecified	13336	[8390-8430]	0.002999400119976005
comp12015_g1_i1	539	0.1280148423005566	(ATATA)n	Simple_repeat	70	[1-70]	0.9857142857142858
comp1201_g1_i1	256	0.28125	piggyBac-10_SM/ClassII/TIR/PiggyBac	Unspecified	2648	[21-93]	0.027190332326283987
comp12022_g1_i1	301	0.2724252491694352	A-rich	Low_complexity	85	[1-85]	0.9882352941176471
comp12023_g1_i1	225	0.10222222222222223	(AG)n	Simple_repeat	24	[1-24]	0.9583333333333334
comp12037_g1_i1	371	0.04851752021563342	(CGC)n	Simple_repeat	20	[1-20]	0.95
comp12040_g1_i1	406	0.2044334975369458	Copia-47_ALY-I	LTR/Copia	5759	[4137-4224]	0.015106789373155061
comp12059_g1_i1	481	0.11850311850311851	(TATTAG)n	Simple_repeat	52	[1-52]	0.9807692307692307
comp12066_g1_i1	273	0.8644688644688645	npiggy2_Mm/ClassII/TIR/PiggyBac	Unspecified	348	[102-347]	0.7040229885057471
comp12067_g1_i1	600	0.13166666666666665	MtPH-A6-1-Ia_	2/ClassII/TIR/PIF-Harbinger	4075	[2524-2598]	0.01815950920245399
comp12075_g1_i1	475	0.13052631578947368	Gypsy-23-I_SP	LTR/Gypsy	7702	[6096-6158]	0.00804985717995326
comp1209_g1_i1	295	0.10508474576271186	(ACACTC)n	Simple_repeat	33	[1-33]	0.9696969696969697
comp12102_g1_i1	361	0.10526315789473684	(GCGA)n	Simple_repeat	39	[1-39]	0.9743589743589743
comp12104_g1_i1	303	0.0924092409240924	(CGCT)n	Simple_repeat	29	[1-29]	0.9655172413793104
comp12110_g1_i1	271	0.24354243542435425	Mariner-31_SM/ClassII/TIR/Tc1-Mariner	Unspecified	2296	[2223-2292]	0.03005226480836237
comp1211_g1_i1	702	0.36752136752136755	Gypsy-10_CFl-I	LTR/Gypsy	4220	[960-1330]	0.08767772511848342
comp12127_g1_i1	414	0.14251207729468598	Penelope-83_LMi	PLE/Penelope	3158	[2530-2590]	0.018999366687777075
comp1212_g1_i1	240	0.1875	Kolobok-N1_AEc/ClassII/?/Kolobok	Unspecified	8251	[4713-4758]	0.005453884377651194
comp12132_g1_i1	455	0.22637362637362637	DNA-8-24_DR/ClassII/?/?	Unspecified	1783	[35-137]	0.05720695457094784
comp12139_g1_i1	1479	0.025693035835023664	(TTATT)n	Simple_repeat	37	[1-37]	0.972972972972973
comp12150_g1_i1	258	0.15503875968992248	A-rich	Low_complexity	42	[1-42]	0.9761904761904762
comp12169_g1_i1	204	0.1568627450980392	(TA)n	Simple_repeat	33	[1-33]	0.9696969696969697
comp1217_g1_i1	614	0.12052117263843648	Mariner-52N1_HSal/ClassII/TIR/Tc1-Mariner	Unspecified	1265	[1068-1141]	0.057707509881422925
comp12188_g1_i1	250	0.236	A-rich	Low_complexity	60	[1-60]	0.9833333333333333
comp12189_g1_i1	864	0.05439814814814815	(TC)n	Simple_repeat	48	[1-48]	0.9791666666666666
comp12190_g1_i1	300	0.3333333333333333	Gypsy-26_Mad-LTR	LTR/Gypsy	2627	[1931-2032]	0.03844689760182718
comp12205_g1_i1	554	0.07581227436823104	(TTA)n	Simple_repeat	41	[1-41]	0.975609756097561
comp12208_g1_i1	263	0.20532319391634982	A-rich	Low_complexity	57	[1-57]	0.9824561403508771
comp1220_g1_i1	251	0.099601593625498	(AATA)n	Simple_repeat	24	[1-24]	0.9583333333333334
comp1221_g1_i1	447	0.09172259507829977	(TA)n	Simple_repeat	42	[1-42]	0.9761904761904762
comp12222_g1_i1	316	0.03481012658227848	(TTTTAA)n	Simple_repeat	46	[2-46]	0.9565217391304348
comp12232_g1_i1	553	0.09041591320072333	A-rich	Low_complexity	50	[1-50]	0.98
comp12236_g1_i1	263	0.18250950570342206	(ATT)n	Simple_repeat	46	[1-46]	0.9782608695652174
comp12240_g1_i1	545	0.03669724770642202	(CT)n	Simple_repeat	21	[1-21]	0.9523809523809523
comp12248_g1_i1	726	0.19972451790633608	DNA-1_CQ/ClassII/?/?	Unspecified	3260	[1343-1499]	0.04785276073619632
comp12257_g1_i1	377	0.15119363395225463	GYPSY6-I_CB	LTR/Gypsy	4218	[2640-2697]	0.013513513513513514
comp12266_g1_i1	392	0.11479591836734694	A-rich	Low_complexity	45	[1-45]	0.9777777777777777
comp1226_g1_i1	354	0.1694915254237288	Ginger1-N1_DR/ClassII/?/Ginger1	Unspecified	2658	[288-439]	0.056809631301730626
comp12283_g1_i1	606	0.06930693069306931	(AAT)n	Simple_repeat	41	[1-41]	0.975609756097561
comp12286_g1_i1	793	0.0416141235813367	(CGC)n	Simple_repeat	34	[1-34]	0.9705882352941176
comp12304_g1_i1	435	0.09885057471264368	(TTATA)n	Simple_repeat	43	[1-43]	0.9767441860465116
comp12305_g1_i1	235	0.2978723404255319	GA-rich	Low_complexity	72	[1-72]	0.9861111111111112
comp12318_g1_i1	672	0.0818452380952381	GA-rich	Low_complexity	56	[1-56]	0.9821428571428571
comp12323_g1_i1	378	0.2328042328042328	SARTTc5	LINE/I	5308	[2533-2621]	0.016578749058025623
comp12324_g1_i1	605	0.06446280991735537	(AATTGA)n	Simple_repeat	42	[1-42]	0.9761904761904762
comp12327_g1_i1	252	0.23015873015873015	A-rich	Low_complexity	57	[1-57]	0.9824561403508771
comp12329_g1_i1	305	0.06885245901639345	(GA)n	Simple_repeat	22	[1-22]	0.9545454545454546
comp1232_g2_i1	481	0.12266112266112267	Copia-59_CCri-I	LTR/Copia	4272	[1944-2001]	0.013342696629213483
comp12331_g1_i1	281	0.099644128113879	(TTC)n	Simple_repeat	30	[1-30]	0.9666666666666667
comp12333_g1_i1	532	0.11842105263157894	DNA2-2_SM/ClassII/?/?	Unspecified	288	[225-288]	0.21875
comp12337_g1_i1	826	0.043583535108958835	(TTTA)n	Simple_repeat	36	[1-36]	0.9722222222222222
comp12338_g1_i1	478	0.3179916317991632	Ginger1-5_HM/ClassII/?/Ginger1	Unspecified	7091	[3677-3779]	0.014384430968833732
comp12342_g1_i1	394	0.0583756345177665	(AGAA)n	Simple_repeat	24	[1-24]	0.9583333333333334
comp12350_g1_i1	246	0.09349593495934959	(GAG)n	Simple_repeat	24	[1-24]	0.9583333333333334
comp12355_g1_i1	303	0.24422442244224424	(TTTTAA)n	Simple_repeat	74	[1-74]	0.9864864864864865
comp12360_g1_i1	250	0.1	(GAAC)n	Simple_repeat	25	[1-25]	0.96
comp12366_g1_i1	255	0.19215686274509805	(GCTC)n	Simple_repeat	51	[1-51]	0.9803921568627451
comp1236_g1_i1	222	0.35585585585585583	(AATA)n	Simple_repeat	83	[1-83]	0.9879518072289156
comp12375_g1_i1	427	0.05152224824355972	(TCG)n	Simple_repeat	23	[1-23]	0.9565217391304348
comp1237_g1_i1	252	0.1746031746031746	(ACAGTA)n	Simple_repeat	45	[1-45]	0.9777777777777777
comp12382_g1_i1	513	0.1286549707602339	(ATT)n	Simple_repeat	67	[1-67]	0.9850746268656716
comp12382_g1_i2	512	0.12890625	(ATT)n	Simple_repeat	67	[1-67]	0.9850746268656716
comp12394_g1_i1	279	0.23655913978494625	(AT)n	Simple_repeat	68	[1-68]	0.9852941176470589
comp12404_g1_i1	445	0.07865168539325842	(ACAA)n	Simple_repeat	38	[1-38]	0.9736842105263158
comp1240_g1_i2	294	0.24489795918367346	ERV-3_PM-I	LTR/ERV	3806	[3729-3800]	0.018654755648975303
comp12415_g1_i1	384	0.109375	A-rich	Low_complexity	43	[1-43]	0.9767441860465116
comp12416_g1_i1	380	0.14736842105263157	(A)n	Simple_repeat	57	[1-57]	0.9824561403508771
comp1242_g1_i1	213	0.15492957746478872	piggyBac-N1_DWil/ClassII/TIR/PiggyBac	Unspecified	658	[1-34]	0.05015197568389058
comp1243_g1_i1	261	0.1532567049808429	(AAT)n	Simple_repeat	41	[1-41]	0.975609756097561
comp12441_g1_i1	286	0.24825174825174826	(TAATAT)n	Simple_repeat	73	[1-73]	0.9863013698630136
comp12442_g1_i1	307	0.09446254071661238	(AG)n	Simple_repeat	30	[1-30]	0.9666666666666667
comp12443_g1_i1	296	0.17905405405405406	A-rich	Low_complexity	57	[1-57]	0.9824561403508771
comp12446_g1_i1	269	0.24535315985130113	AFROSINE3	SINE/tRNA	217	[12-78]	0.30414746543778803
comp12462_g1_i1	362	0.20994475138121546	BEL-12_LH-I	LTR/Bel-Pao	5954	[2940-3016]	0.012764528048370843
comp12464_g1_i1	368	0.0625	(TA)n	Simple_repeat	25	[1-25]	0.96
comp12465_g1_i1	345	0.09855072463768116	(TTACTAA)n	Simple_repeat	36	[1-36]	0.9722222222222222
comp12470_g1_i1	516	0.07170542635658915	(GTA)n	Simple_repeat	38	[1-38]	0.9736842105263158
comp12476_g1_i1	377	0.6870026525198939	DNA-1_CQ/ClassII/?/?	Unspecified	3260	[1296-1557]	0.08006134969325153
comp12477_g1_i1	420	0.12380952380952381	Gypsy-63_AA-I	LTR/Gypsy	4309	[3841-3896]	0.012763982362497098
comp12481_g1_i1	220	0.2590909090909091	GA-rich	Low_complexity	60	[1-60]	0.9833333333333333
comp12485_g1_i1	441	0.07709750566893424	(AGAA)n	Simple_repeat	37	[1-37]	0.972972972972973
comp12486_g1_i1	506	0.1007905138339921	LTR11	LTR/Retrovirus	684	[336-387]	0.07456140350877193
comp12489_g1_i1	295	0.1694915254237288	A-rich	Low_complexity	51	[1-51]	0.9803921568627451
comp12495_g1_i1	448	0.049107142857142856	(GGC)n	Simple_repeat	23	[1-23]	0.9565217391304348
comp12499_g1_i1	443	0.08577878103837472	(GATGC)n	Simple_repeat	40	[1-40]	0.975
comp1249_g1_i1	354	0.5480225988700564	R1A_NVi	LINE/I	6351	[2882-3045]	0.02566524956699732
comp12504_g1_i1	413	0.5012106537530266	Jockey-5_DK	LINE/Jockey	2397	[1266-1354]	0.03671255736337088
comp1250_g1_i1	436	0.1444954128440367	Mariner-1B_HSal/ClassII/TIR/Tc1-Mariner	Unspecified	1287	[195-257]	0.048174048174048176
comp12517_g1_i1	371	0.10242587601078167	(AATAACA)n	Simple_repeat	40	[1-40]	0.975
comp12529_g1_i1	695	0.0460431654676259	(CAGC)n	Simple_repeat	33	[1-33]	0.9696969696969697
comp1252_g1_i1	366	0.07377049180327869	(TA)n	Simple_repeat	27	[1-27]	0.9629629629629629
comp12530_g1_i1	211	0.0995260663507109	(TA)n	Simple_repeat	22	[1-22]	0.9545454545454546
comp12550_g1_i1	259	0.1776061776061776	Mariner-22_SIn/ClassII/TIR/Tc1-Mariner	Unspecified	1553	[1449-1494]	0.028976175144880875
comp12553_g1_i1	305	0.24918032786885247	(AATAAG)n	Simple_repeat	74	[1-74]	0.9864864864864865
comp12554_g1_i1	322	0.4192546583850932	Mariner_Tbel/ClassII/TIR/Tc1-Mariner	Unspecified	1283	[86-224]	0.10756040530007795
comp12558_g1_i1	317	0.15141955835962145	(GGT)n	Simple_repeat	49	[1-49]	0.9795918367346939
comp12563_g1_i1	865	0.04046242774566474	(T)n	Simple_repeat	36	[1-36]	0.9722222222222222
comp12579_g1_i1	301	0.12292358803986711	Helitron-N1_SP/ClassII/Helitron/Helitron	Unspecified	1957	[45-82]	0.01890648952478283
comp12586_g1_i1	392	0.04336734693877551	(TATATT)n	Simple_repeat	100	[1-55]	0.54
comp12587_g1_i1	418	0.12440191387559808	(CG)n	Simple_repeat	53	[1-53]	0.9811320754716981
comp12590_g1_i1	296	0.12837837837837837	(ATAATT)n	Simple_repeat	36	[1-36]	0.9722222222222222
comp12592_g1_i1	707	0.0891089108910891	Mariner-15_SIn/ClassII/TIR/Tc1-Mariner	Unspecified	2688	[475-522]	0.017485119047619048
comp12597_g1_i1	323	0.12074303405572756	(TTTC)n	Simple_repeat	39	[1-39]	0.9743589743589743
comp1259_g1_i1	428	0.08878504672897196	A-rich	Low_complexity	38	[1-38]	0.9736842105263158
comp12606_g1_i1	460	0.18478260869565216	Mariner-91_HSal/ClassII/TIR/Tc1-Mariner	Unspecified	2395	[17-109]	0.038413361169102295
comp12608_g1_i1	442	0.14479638009049775	U2	?/?	896	[555-616]	0.06808035714285714
comp12619_g1_i1	438	0.0821917808219178	piggyBac-15_LMi/ClassII/TIR/PiggyBac	Unspecified	2444	[1-37]	0.014729950900163666
comp1261_g1_i1	832	0.7800480769230769	Gypsy-7_CFl-I	LTR/Gypsy	7283	[2747-3398]	0.08938624193326926
comp12626_g1_i1	551	0.06352087114337568	(TGTACA)n	Simple_repeat	34	[1-34]	0.9705882352941176
comp12628_g1_i1	273	0.2271062271062271	(TTAT)n	Simple_repeat	64	[1-64]	0.984375
comp12635_g1_i1	386	0.054404145077720206	(TTAT)n	Simple_repeat	23	[1-23]	0.9565217391304348
comp12637_g1_i1	294	0.07142857142857142	(CCGT)n	Simple_repeat	22	[1-22]	0.9545454545454546
comp12652_g1_i1	743	0.034993270524899055	(TAACG)n	Simple_repeat	28	[1-28]	0.9642857142857143
comp12655_g1_i1	434	0.17511520737327188	hAT-N159_DR/ClassII/TIR/hAT	Unspecified	1822	[215-301]	0.04720087815587267
comp12670_g1_i1	437	0.08695652173913043	GA-rich	Low_complexity	40	[1-40]	0.975
comp12673_g1_i1	468	0.06196581196581197	(C)n	Simple_repeat	30	[1-30]	0.9666666666666667
comp12689_g1_i1	322	0.4503105590062112	Mariner3-5_LMi/ClassII/TIR/Tc1-Mariner	Unspecified	3274	[2442-2580]	0.042150274893097125
comp12695_g1_i1	512	0.060546875	(TATGAT)n	Simple_repeat	31	[1-31]	0.967741935483871
comp126_g1_i1	295	0.23728813559322035	piggyBac-N1_HSal/ClassII/TIR/PiggyBac	Unspecified	745	[633-745]	0.15033557046979865
comp12700_g1_i1	322	0.14906832298136646	(TCTT)n	Simple_repeat	47	[1-47]	0.9787234042553191
comp12704_g1_i1	317	0.15457413249211358	A-rich	Low_complexity	48	[1-48]	0.9791666666666666
comp12707_g1_i1	375	0.2853333333333333	(AATATTA)n	Simple_repeat	104	[1-104]	0.9903846153846154
comp12709_g1_i1	591	0.06598984771573604	(TTTTAT)n	Simple_repeat	42	[1-42]	0.9761904761904762
comp12719_g1_i1	625	0.1232	GA-rich	Low_complexity	76	[1-76]	0.9868421052631579
comp12729_g1_i1	282	0.09219858156028368	BEL-188_AA-I	LTR/Bel-Pao	6505	[5582-5608]	0.003996925441967717
comp12745_g1_i1	670	0.20597014925373133	Transib-2_SIn/ClassII/TIR/Transib	Unspecified	3144	[2995-3144]	0.04739185750636132
comp12747_g1_i1	509	0.07662082514734773	(AT)n	Simple_repeat	40	[1-40]	0.975
comp12771_g1_i1	536	0.08582089552238806	(AATT)n	Simple_repeat	44	[1-44]	0.9772727272727273
comp12776_g1_i1	386	0.9507772020725389	Gypsy-59_DWil-I	LTR/Gypsy	5855	[4515-4884]	0.06302305721605465
comp12781_g1_i1	460	0.14130434782608695	BEL-5_DYa-I	LTR/Bel-Pao	5651	[2608-2676]	0.01203326844806229
comp12782_g1_i1	536	0.08955223880597014	(TTC)n	Simple_repeat	49	[1-49]	0.9795918367346939
comp12789_g1_i1	618	0.06957928802588997	(TTTTAAT)n	Simple_repeat	41	[1-41]	0.975609756097561
comp12799_g1_i1	219	0.1004566210045662	(GA)n	Simple_repeat	23	[1-23]	0.9565217391304348
comp12802_g1_i1	316	0.19936708860759494	Helitron-1_DVir/ClassII/Helitron/Helitron	Unspecified	8816	[3873-3934]	0.006919237749546279
comp12811_g1_i1	276	0.35144927536231885	Polinton-9_NVi/ClassII/Maverick/Maverick	Unspecified	17121	[1578-1666]	0.0051398866888616316
comp12832_g1_i1	272	0.2536764705882353	(AGAT)n	Simple_repeat	70	[1-70]	0.9857142857142858
comp12842_g1_i1	470	0.05531914893617021	(CG)n	Simple_repeat	27	[1-27]	0.9629629629629629
comp12856_g1_i1	384	0.078125	(GAAAGA)n	Simple_repeat	31	[1-31]	0.967741935483871
comp12857_g1_i1	287	0.6480836236933798	Copia-4_Cfl-I	LTR/Copia	4138	[1450-1643]	0.04664088931851136
comp12864_g1_i1	210	0.09523809523809523	(AG)n	Simple_repeat	21	[1-21]	0.9523809523809523
comp12870_g1_i1	211	0.1943127962085308	Gypsy-63_CGi-I	LTR/Gypsy	5999	[1251-1292]	0.006834472412068678
comp12875_g1_i1	464	0.07974137931034483	(TATTT)n	Simple_repeat	37	[1-37]	0.972972972972973
comp12891_g1_i1	258	0.08139534883720931	(GC)n	Simple_repeat	23	[1-23]	0.9565217391304348
comp12911_g1_i1	455	0.12087912087912088	Harbinger-11_MLP/ClassII/TIR/PIF-Harbinger	Unspecified	3072	[2791-2850]	0.019205729166666668
comp12914_g1_i1	300	0.06333333333333334	(GA)n	Simple_repeat	20	[1-20]	0.95
comp12916_g1_i1	218	0.17889908256880735	(GGC)n	Simple_repeat	40	[1-40]	0.975
comp1291_g1_i1	278	0.1510791366906475	(AAGGTTA)n	Simple_repeat	43	[1-43]	0.9767441860465116
comp12929_g1_i1	745	0.05100671140939597	(TTTTCAA)n	Simple_repeat	37	[1-37]	0.972972972972973
comp12930_g1_i1	300	0.07666666666666666	(TTTTC)n	Simple_repeat	26	[1-26]	0.9615384615384616
comp12935_g1_i1	260	0.2230769230769231	(GATGGA)n	Simple_repeat	56	[1-56]	0.9821428571428571
comp12937_g1_i1	453	0.10375275938189846	Helitron-2N_DW/ClassII/Helitron/Helitron	Unspecified	827	[132-179]	0.056831922611850064
comp12939_g1_i1	299	0.06354515050167224	(GCTC)n	Simple_repeat	21	[1-21]	0.9523809523809523
comp12944_g1_i1	289	0.06920415224913495	(AG)n	Simple_repeat	21	[1-21]	0.9523809523809523
comp12945_g1_i1	341	0.1378299120234604	A-rich	Low_complexity	45	[1-45]	0.9777777777777777
comp1294_g1_i1	283	0.6749116607773852	Mariner-N15_HSal/ClassII/TIR/Tc1-Mariner	Unspecified	2024	[1823-2022]	0.0983201581027668
comp1294_g1_i2	258	0.6395348837209303	Mariner-N15_HSal/ClassII/TIR/Tc1-Mariner	Unspecified	2024	[1-169]	0.08300395256916997
comp12955_g1_i1	425	0.35294117647058826	Gypsy-18_LH-I	LTR/Gypsy	4412	[4145-4278]	0.03014505893019039
comp12957_g1_i1	586	0.06655290102389079	(AATATTA)n	Simple_repeat	40	[1-40]	0.975
comp12959_g1_i1	299	0.09364548494983277	(ATTCG)n	Simple_repeat	29	[1-29]	0.9655172413793104
comp12960_g1_i1	511	0.1898238747553816	GA-rich	Low_complexity	96	[1-96]	0.9895833333333334
comp1296_g1_i1	1047	0.2082139446036294	G4_DM	LINE/Jockey	3856	[2571-2782]	0.05471991701244813
comp12982_g1_i1	367	0.10626702997275204	(ATCAA)n	Simple_repeat	43	[1-43]	0.9767441860465116
comp12996_g1_i1	532	0.07706766917293233	(TATTTG)n	Simple_repeat	41	[1-41]	0.975609756097561
comp13010_g1_i1	437	0.18764302059496568	MuDR-7_GM/ClassII/TIR/MuDR	Unspecified	7958	[3737-3822]	0.010681075647147525
comp13016_g1_i1	320	0.140625	(AATACA)n	Simple_repeat	46	[1-46]	0.9782608695652174
comp13017_g1_i1	297	0.10101010101010101	(CCGCG)n	Simple_repeat	31	[1-31]	0.967741935483871
comp13018_g1_i1	318	0.11949685534591195	(AATTTTC)n	Simple_repeat	40	[1-40]	0.975
comp13026_g1_i1	264	0.17045454545454544	(AAT)n	Simple_repeat	43	[1-43]	0.9767441860465116
comp1302_g1_i1	302	0.12251655629139073	(ATT)n	Simple_repeat	38	[1-38]	0.9736842105263158
comp13035_g1_i1	564	0.05673758865248227	Mariner-13_AEc/ClassII/TIR/Tc1-Mariner	Unspecified	1300	[1-33]	0.024615384615384615
comp13041_g1_i1	263	0.21292775665399238	A-rich	Low_complexity	53	[1-53]	0.9811320754716981
comp13047_g1_i1	411	0.09732360097323602	(TTATTTA)n	Simple_repeat	42	[1-42]	0.9761904761904762
comp13049_g1_i1	268	0.10074626865671642	(ATATT)n	Simple_repeat	27	[1-27]	0.9629629629629629
comp13053_g1_i1	278	0.05755395683453238	(ATA)n	Simple_repeat	58	[1-58]	0.9827586206896551
comp13059_g1_i1	443	0.23702031602708803	BEL-7_DTa-I	LTR/Bel-Pao	5617	[4335-4425]	0.01602278796510593
comp13068_g1_i1	251	0.49800796812749004	R5-1_SM	LINE/R2	5465	[4866-4993]	0.0232387923147301
comp13069_g1_i1	307	0.09446254071661238	(ATTT)n	Simple_repeat	33	[1-33]	0.9696969696969697
comp13072_g1_i1	229	0.1965065502183406	hAT-N4_ALy/ClassII/TIR/hAT	Unspecified	1146	[765-810]	0.03926701570680628
comp13078_g1_i1	250	0.312	(AAT)n	Simple_repeat	76	[1-76]	0.9868421052631579
comp13086_g1_i1	344	0.18895348837209303	Kolobok-N1_PBa/ClassII/?/Kolobok	Unspecified	509	[30-96]	0.12966601178781925
comp13088_g1_i1	258	0.4573643410852713	Mariner-N15_HSal/ClassII/TIR/Tc1-Mariner	Unspecified	2024	[16-137]	0.059782608695652176
comp13089_g1_i1	221	0.11764705882352941	(GCATC)n	Simple_repeat	28	[1-28]	0.9642857142857143
comp13092_g1_i1	287	0.18118466898954705	GA-rich	Low_complexity	53	[1-53]	0.9811320754716981
comp13106_g1_i1	239	0.32217573221757323	Mariner-74_HSal/ClassII/TIR/Tc1-Mariner	Unspecified	1295	[1186-1263]	0.05945945945945946
comp13110_g1_i1	226	0.15486725663716813	(AATTT)n	Simple_repeat	35	[1-35]	0.9714285714285714
comp13113_g1_i1	291	0.09621993127147767	(AATTAT)n	Simple_repeat	32	[1-32]	0.96875
comp13117_g1_i1	470	0.04680851063829787	(TTG)n	Simple_repeat	23	[1-23]	0.9565217391304348
comp13126_g1_i1	352	0.11079545454545454	piggyBac-N1_HSal/ClassII/TIR/PiggyBac	Unspecified	745	[706-745]	0.052348993288590606
comp13134_g1_i1	442	0.10180995475113122	(TATTTA)n	Simple_repeat	46	[1-46]	0.9782608695652174
comp13140_g1_i1	623	0.08186195826645265	(ATTTT)n	Simple_repeat	50	[1-50]	0.98
comp13142_g1_i1	547	0.10968921389396709	(TTTT)n	Simple_repeat	61	[1-61]	0.9836065573770492
comp13145_g1_i1	399	0.9949874686716792	RAM13_I_MT_	2	2074	[1622-2016]	0.18997107039537126
comp13154_g1_i1	246	0.08536585365853659	(GAAA)n	Simple_repeat	22	[1-22]	0.9545454545454546
comp13155_g1_i1	972	0.0360082304526749	(CT)n	Simple_repeat	35	[1-35]	0.9714285714285714
comp13166_g1_i1	284	0.1443661971830986	(TTTTTA)n	Simple_repeat	44	[1-44]	0.9772727272727273
comp13170_g1_i1	441	0.2290249433106576	Gypsy-84_MLP-I	LTR/Gypsy	8435	[929-1026]	0.01149970361588619
comp13176_g1_i1	294	0.14625850340136054	Merlin-N5_HSal/ClassII/TIR/Merlin	Unspecified	981	[903-946]	0.04383282364933741
comp1317_g1_i1	678	0.5545722713864307	Jockey-1_LVa	LINE/Jockey	8100	[440-816]	0.046419753086419754
comp13189_g1_i1	503	0.2922465208747515	Mariner-28_DF/ClassII/TIR/Tc1-Mariner	Unspecified	943	[563-671]	0.11452810180275716
comp13193_g1_i1	687	0.024745269286754003	(CG)n	Simple_repeat	18	[1-18]	0.9444444444444444
comp13196_g1_i1	272	0.20955882352941177	EnSpm-4_HM/ClassII/TIR/CACTA	Unspecified	8857	[5048-5104]	0.006322682623913289
comp13197_g1_i1	275	0.15272727272727274	GA-rich	Low_complexity	43	[1-43]	0.9767441860465116
comp13201_g1_i1	274	0.22262773722627738	piggyBac-N1_DWil/ClassII/TIR/PiggyBac	Unspecified	658	[1-60]	0.08966565349544073
comp13210_g1_i1	328	0.09146341463414634	(T)n	Simple_repeat	31	[1-31]	0.967741935483871
comp13211_g1_i1	624	0.06570512820512821	GA-rich	Low_complexity	43	[1-43]	0.9767441860465116
comp13229_g1_i1	227	0.18502202643171806	(TCTCTTG)n	Simple_repeat	46	[1-46]	0.9782608695652174
comp13231_g1_i1	266	0.07894736842105263	(GA)n	Simple_repeat	22	[1-22]	0.9545454545454546
comp13232_g1_i1	688	0.08430232558139535	GA-rich	Low_complexity	59	[1-59]	0.9830508474576272
comp13250_g1_i1	664	0.0572289156626506	(AATCT)n	Simple_repeat	37	[1-37]	0.972972972972973
comp13251_g1_i1	543	0.2946593001841621	R1B_NVi	LINE/I	6140	[2164-2321]	0.0255700325732899
comp13267_g1_i1	271	0.11439114391143912	(TTTAA)n	Simple_repeat	33	[1-33]	0.9696969696969697
comp13268_g1_i1	291	0.08247422680412371	(CGAT)n	Simple_repeat	25	[1-25]	0.96
comp13268_g1_i2	344	0.06686046511627906	(GATC)n	Simple_repeat	24	[1-24]	0.9583333333333334
comp13279_g1_i1	506	0.06324110671936758	CSINE2	SINE/?	344	[251-283]	0.09302325581395349
comp13280_g1_i1	259	0.16988416988416988	(G)n	Simple_repeat	45	[1-45]	0.9777777777777777
comp13281_g1_i1	327	0.14067278287461774	(TTATT)n	Simple_repeat	47	[1-47]	0.9787234042553191
comp13282_g1_i1	305	0.12131147540983607	(GT)n	Simple_repeat	38	[1-38]	0.9736842105263158
comp13286_g1_i1	467	0.3233404710920771	R1-1_AEc	LINE/I	3994	[2787-2938]	0.03780671006509765
comp13289_g1_i1	304	0.3519736842105263	Mariner-N2_PBa/ClassII/TIR/Tc1-Mariner	Unspecified	3127	[2925-3018]	0.029740965781899584
comp1328_g1_i1	886	0.07900677200902935	CR1-78_AAe	LINE/Jockey	4219	[4148-4218]	0.016591609386110453
comp1329_g2_i1	307	0.21172638436482086	Mariner-6_AF/ClassII/TIR/Tc1-Mariner	Unspecified	1995	[664-723]	0.02957393483709273
comp1330_g1_i1	238	0.6302521008403361	MARIAM1/ClassII/TIR/Tc1-Mariner	Unspecified	1284	[1129-1284]	0.12071651090342679
comp13310_g1_i1	260	0.09615384615384616	(CGAT)n	Simple_repeat	26	[1-26]	0.9615384615384616
comp13314_g1_i1	268	0.08208955223880597	(TTA)n	Simple_repeat	23	[1-23]	0.9565217391304348
comp13318_g1_i1	253	0.3557312252964427	GA-rich	Low_complexity	90	[1-90]	0.9888888888888889
comp13323_g1_i1	344	0.9244186046511628	GA-rich	Low_complexity	315	[1-315]	0.9968253968253968
comp13328_g1_i1	1064	0.015977443609022556	(ATT)n	Simple_repeat	18	[1-18]	0.9444444444444444
comp13330_g1_i1	209	0.8133971291866029	hAT-26_SM/ClassII/TIR/hAT	Unspecified	3040	[2792-3017]	0.07401315789473684
comp13340_g1_i1	319	0.8213166144200627	Mariner-4_LMi/ClassII/TIR/Tc1-Mariner	Unspecified	1626	[434-696]	0.16113161131611317
comp13345_g1_i1	457	0.0700218818380744	(CGG)n	Simple_repeat	33	[1-33]	0.9696969696969697
comp13354_g1_i1	289	0.13494809688581316	(TTCAA)n	Simple_repeat	42	[1-42]	0.9761904761904762
comp13361_g1_i1	464	0.41163793103448276	Mariner-9_DAn/ClassII/TIR/Tc1-Mariner	Unspecified	1578	[710-896]	0.11787072243346007
comp13368_g1_i1	388	0.19072164948453607	(GGT)n	Simple_repeat	73	[1-73]	0.9863013698630136
comp13370_g1_i1	440	0.056818181818181816	(GGAC)n	Simple_repeat	26	[1-26]	0.9615384615384616
comp13378_g1_i1	440	0.15681818181818183	(CGACGA)n	Simple_repeat	70	[1-70]	0.9857142857142858
comp13384_g1_i1	692	0.2239884393063584	(TTCTCAT)n	Simple_repeat	156	[1-156]	0.9935897435897436
comp13389_g1_i1	318	0.13836477987421383	(CGCGC)n	Simple_repeat	45	[1-45]	0.9777777777777777
comp13390_g1_i1	236	0.3432203389830508	hAT-N4_ALy/ClassII/TIR/hAT	Unspecified	1146	[711-792]	0.07068062827225131
comp13398_g1_i1	289	0.09688581314878893	(GA)n	Simple_repeat	30	[1-30]	0.9666666666666667
comp1339_g2_i1	354	0.23728813559322035	Mariner-102_HSal/ClassII/TIR/Tc1-Mariner	Unspecified	1119	[484-569]	0.07596067917783736
comp133_g1_i1	401	0.10723192019950124	A-rich	Low_complexity	46	[1-46]	0.9782608695652174
comp133_g1_i2	424	0.10141509433962265	A-rich	Low_complexity	46	[1-46]	0.9782608695652174
comp13414_g1_i1	593	0.05733558178752108	(GCGGC)n	Simple_repeat	33	[1-33]	0.9696969696969697
comp13425_g1_i1	932	0.06545064377682404	(AATATA)n	Simple_repeat	62	[1-62]	0.9838709677419355
comp13440_g1_i1	406	0.0812807881773399	(AGCG)n	Simple_repeat	35	[1-35]	0.9714285714285714
comp13464_g1_i1	434	0.17511520737327188	CER15-1-I_CE	LTR/?	6211	[2469-2541]	0.011592336177749154
comp13471_g1_i1	264	0.13636363636363635	Kiri-23_AAe	?/?	4456	[1846-1882]	0.00807899461400359
comp13476_g1_i1	301	0.17275747508305647	(TTATA)n	Simple_repeat	51	[1-51]	0.9803921568627451
comp13488_g1_i1	293	0.10921501706484642	(GACGA)n	Simple_repeat	32	[1-32]	0.96875
comp13499_g1_i1	236	0.4406779661016949	DNA8-25_DR/ClassII/?/?	Unspecified	3967	[702-807]	0.026468364003024956
comp13511_g1_i1	248	0.2620967741935484	(AATA)n	Simple_repeat	62	[1-62]	0.9838709677419355
comp13528_g1_i1	250	0.14	(ATAA)n	Simple_repeat	33	[1-33]	0.9696969696969697
comp13532_g1_i1	300	0.14	(CCTT)n	Simple_repeat	43	[1-43]	0.9767441860465116
comp13536_g1_i1	440	0.3522727272727273	(TTATTA)n	Simple_repeat	156	[1-156]	0.9935897435897436
comp13546_g1_i1	356	0.08707865168539326	(TATTGT)n	Simple_repeat	32	[1-32]	0.96875
comp1354_g1_i1	731	0.057455540355677154	(CAGCAGCACA)n	Simple_repeat	45	[1-45]	0.9777777777777777
comp13563_g1_i1	452	0.06637168141592921	(AAAT)n	Simple_repeat	31	[1-31]	0.967741935483871
comp13570_g1_i1	266	0.17293233082706766	(CTTTTC)n	Simple_repeat	48	[1-48]	0.9791666666666666
comp13575_g1_i1	487	0.188911704312115	Gypsy-237_AA-I	LTR/Gypsy	4794	[3031-3120]	0.018564872757613683
comp13576_g1_i1	822	0.057177615571776155	BEL-2_AEc-I	LTR/Bel-Pao	5786	[5485-5532]	0.008123055651572762
comp13578_g1_i1	360	0.08611111111111111	(GCC)n	Simple_repeat	32	[1-32]	0.96875
comp13580_g1_i1	489	0.081799591002045	(CGAGA)n	Simple_repeat	42	[1-42]	0.9761904761904762
comp13588_g1_i1	462	0.09307359307359307	(TATTTAT)n	Simple_repeat	41	[1-41]	0.975609756097561
comp13591_g1_i1	397	0.1889168765743073	Penelope-1_DR	PLE/Penelope	4446	[4070-4145]	0.016869095816464237
comp13603_g1_i1	320	0.40625	BEL-4_SI-I	LTR/Bel-Pao	5508	[1827-1950]	0.022331154684095862
comp13612_g1_i1	373	0.10455764075067024	A-rich	Low_complexity	40	[1-40]	0.975
comp13613_g1_i1	462	0.09956709956709957	A-rich	Low_complexity	46	[1-46]	0.9782608695652174
comp13620_g1_i1	297	0.13131313131313133	EnSpm-N13_DR/ClassII/TIR/CACTA	Unspecified	22149	[17564-17612]	0.00216714072870107
comp13628_g1_i1	354	0.18361581920903955	Gypsy-19_BD-I	LTR/Gypsy	5211	[3948-4011]	0.012089810017271158
comp13633_g1_i1	435	0.09425287356321839	(TATTAAT)n	Simple_repeat	46	[1-46]	0.9782608695652174
comp13636_g1_i1	501	0.37524950099800397	Mariner-11_DBp/ClassII/TIR/Tc1-Mariner	Unspecified	1643	[1017-1203]	0.11320754716981132
comp13637_g1_i1	307	0.19543973941368079	(TTTAA)n	Simple_repeat	57	[1-57]	0.9824561403508771
comp1364_g1_i1	287	0.21951219512195122	(TATAT)n	Simple_repeat	63	[1-63]	0.9841269841269841
comp1364_g2_i1	460	0.06086956521739131	(TA)n	Simple_repeat	29	[1-29]	0.9655172413793104
comp13658_g1_i1	295	0.16271186440677965	(TTAT)n	Simple_repeat	50	[1-50]	0.98
comp1365_g1_i1	252	0.17857142857142858	Kolobok-N1_AEc/ClassII/?/Kolobok	Unspecified	8251	[4709-4754]	0.005453884377651194
comp13661_g1_i1	423	0.21513002364066194	P-1_DR/ClassII/TIR/P	Unspecified	9968	[7312-7407]	0.009530497592295345
comp13673_g1_i1	745	0.8228187919463087	DM176	LTR/Gypsy	7439	[3231-4209]	0.13146928350584755
comp13687_g1_i1	461	0.09544468546637744	(AGAGA)n	Simple_repeat	45	[1-45]	0.9777777777777777
comp13698_g1_i1	316	0.060126582278481014	Copia-7_ES-I	LTR/Copia	5709	[3337-3381]	0.007707129094412331
comp13705_g1_i1	371	0.09164420485175202	(TGGTAT)n	Simple_repeat	37	[1-37]	0.972972972972973
comp13709_g1_i1	273	0.24175824175824176	(CGACG)n	Simple_repeat	69	[1-69]	0.9855072463768116
comp1370_g1_i1	267	0.17228464419475656	(AATA)n	Simple_repeat	48	[1-48]	0.9791666666666666
comp13710_g1_i1	299	0.3377926421404682	Mariner-4_LMi/ClassII/TIR/Tc1-Mariner	Unspecified	1626	[1525-1626]	0.06211562115621156
comp13717_g1_i1	442	0.1493212669683258	Mariner-2_MLP/ClassII/TIR/Tc1-Mariner	Unspecified	1332	[512-576]	0.04804804804804805
comp13736_g1_i1	695	0.25755395683453236	Mariner-2_HSal/ClassII/TIR/Tc1-Mariner	Unspecified	1314	[911-1095]	0.1400304414003044
comp13738_g1_i1	420	0.11190476190476191	(TCGAA)n	Simple_repeat	48	[1-48]	0.9791666666666666
comp13762_g1_i1	1233	0.038118410381184104	A-rich	Low_complexity	47	[1-47]	0.9787234042553191
comp13771_g1_i1	314	0.1178343949044586	(ATTAA)n	Simple_repeat	38	[1-38]	0.9736842105263158
comp13777_g1_i1	218	0.9954128440366973	R1-2_DGr	LINE/I	5678	[1815-2015]	0.03522367030644593
comp13784_g1_i1	618	0.2669902912621359	(AATAT)n	Simple_repeat	160	[1-160]	0.99375
comp13791_g1_i1	877	0.04903078677309008	(AATGTTT)n	Simple_repeat	45	[1-45]	0.9777777777777777
comp13793_g1_i1	568	0.04929577464788732	(TGGC)n	Simple_repeat	29	[1-29]	0.9655172413793104
comp13801_g1_i1	257	0.1245136186770428	A-rich	Low_complexity	36	[1-36]	0.9722222222222222
comp13810_g1_i1	323	0.19504643962848298	(ATT)n	Simple_repeat	63	[1-63]	0.9841269841269841
comp13811_g1_i1	263	0.22433460076045628	(GTTTTTG)n	Simple_repeat	58	[1-58]	0.9827586206896551
comp13814_g1_i1	265	0.08679245283018867	(CGG)n	Simple_repeat	24	[1-24]	0.9583333333333334
comp1381_g1_i1	473	0.09090909090909091	(ATTT)n	Simple_repeat	45	[1-45]	0.9777777777777777
comp1381_g1_i2	413	0.10411622276029056	(ATTT)n	Simple_repeat	45	[1-45]	0.9777777777777777
comp13821_g1_i1	291	0.11683848797250859	(CTCT)n	Simple_repeat	35	[1-35]	0.9714285714285714
comp13827_g1_i1	298	0.16778523489932887	Merlin-1N1_PBa/ClassII/TIR/Merlin	Unspecified	1218	[990-1040]	0.041050903119868636
comp13835_g1_i1	696	0.07327586206896551	LTR-1_Mad	LTR/Gypsy	3448	[81-133]	0.015081206496519721
comp13838_g1_i1	710	0.13098591549295774	Mariner-N15_HSal/ClassII/TIR/Tc1-Mariner	Unspecified	2024	[24-118]	0.046442687747035576
comp13844_g1_i1	454	0.09251101321585903	GA-rich	Low_complexity	43	[1-43]	0.9767441860465116
comp13845_g1_i1	331	0.24773413897280966	(ATATATT)n	Simple_repeat	77	[1-77]	0.987012987012987
comp13863_g1_i1	334	0.08682634730538923	(ACACGC)n	Simple_repeat	31	[1-31]	0.967741935483871
comp13867_g1_i1	770	0.05064935064935065	(CATATA)n	Simple_repeat	39	[1-39]	0.9743589743589743
comp13870_g1_i1	360	0.1527777777777778	A-rich	Low_complexity	53	[1-53]	0.9811320754716981
comp13874_g1_i1	427	0.10070257611241218	EnSpm-9_DR/ClassII/TIR/CACTA	Unspecified	8620	[761-804]	0.004988399071925754
comp13876_g1_i1	454	0.08149779735682819	(TCGC)n	Simple_repeat	39	[1-39]	0.9743589743589743
comp13877_g1_i1	250	0.116	(CCG)n	Simple_repeat	30	[1-30]	0.9666666666666667
comp13882_g1_i1	415	0.40963855421686746	piggyBac2_Mm/ClassII/TIR/PiggyBac	Unspecified	2211	[742-912]	0.07688828584350972
comp1388_g1_i2	325	0.24923076923076923	L1-2_HM	LINE/L1	5768	[179-271]	0.0159500693481276
comp13895_g1_i1	556	0.09172661870503597	Gypsy-2_MLP-I	LTR/Gypsy	8007	[6001-6048]	0.005869863869114525
comp13918_g1_i1	280	0.36428571428571427	(TAA)n	Simple_repeat	100	[1-100]	0.99
comp13923_g1_i1	467	0.06638115631691649	(AAGATT)n	Simple_repeat	32	[1-32]	0.96875
comp13930_g1_i1	532	0.06015037593984962	(AGAGAA)n	Simple_repeat	31	[1-31]	0.967741935483871
comp13932_g1_i1	258	0.15503875968992248	A-rich	Low_complexity	43	[1-43]	0.9767441860465116
comp13952_g1_i1	650	0.09230769230769231	(ATGTTAT)n	Simple_repeat	59	[1-59]	0.9830508474576272
comp13953_g1_i1	510	0.049019607843137254	(GA)n	Simple_repeat	27	[1-27]	0.9629629629629629
comp13955_g1_i1	343	0.11078717201166181	(CGTTT)n	Simple_repeat	41	[1-41]	0.975609756097561
comp13956_g1_i1	292	0.2910958904109589	RTAg4	LINE/I	7072	[2197-2282]	0.01201923076923077
comp13958_g1_i1	270	0.1259259259259259	(ATAATT)n	Simple_repeat	35	[1-35]	0.9714285714285714
comp13963_g1_i1	448	0.10491071428571429	(GTCTTT)n	Simple_repeat	50	[1-50]	0.98
comp13972_g1_i1	609	0.04597701149425287	(ATTT)n	Simple_repeat	32	[1-32]	0.96875
comp13979_g1_i1	388	0.13659793814432988	hAT-77_HM/ClassII/TIR/hAT	Unspecified	2840	[648-703]	0.01936619718309859
comp13991_g1_i1	294	0.11904761904761904	A-rich	Low_complexity	34	[1-34]	0.9705882352941176
comp1399_g1_i1	352	0.12215909090909091	(TGCAACG)n	Simple_repeat	44	[1-44]	0.9772727272727273
comp1399_g1_i2	211	0.16113744075829384	(TTTCGA)n	Simple_repeat	35	[1-35]	0.9714285714285714
comp14003_g1_i1	313	0.12779552715654952	(TTACAAT)n	Simple_repeat	40	[1-40]	0.975
comp14017_g1_i1	507	0.11045364891518737	(TCTATT)n	Simple_repeat	60	[1-60]	0.9833333333333333
comp14020_g1_i1	747	0.11780455153949129	(ATT)n	Simple_repeat	86	[1-86]	0.9883720930232558
comp14022_g1_i1	322	0.12422360248447205	(ATA)n	Simple_repeat	39	[1-39]	0.9743589743589743
comp14027_g1_i1	326	0.11042944785276074	GA-rich	Low_complexity	36	[1-36]	0.9722222222222222
comp14028_g1_i1	478	0.13179916317991633	(TTAATGA)n	Simple_repeat	61	[1-61]	0.9836065573770492
comp14032_g1_i1	234	0.1282051282051282	(AG)n	Simple_repeat	31	[1-31]	0.967741935483871
comp1403_g1_i1	333	0.12612612612612611	(CTTAA)n	Simple_repeat	39	[1-39]	0.9743589743589743
comp14041_g1_i1	413	0.13559322033898305	Kolobok-1_SIn/ClassII/?/Kolobok	Unspecified	2775	[2193-2248]	0.01981981981981982
comp14046_g1_i1	250	0.216	(CCGCGC)n	Simple_repeat	49	[1-49]	0.9795918367346939
comp14050_g1_i1	457	0.08971553610503283	A-rich	Low_complexity	43	[1-43]	0.9767441860465116
comp14052_g1_i1	459	0.10239651416122005	A-rich	Low_complexity	50	[1-50]	0.98
comp14055_g1_i1	966	0.07039337474120083	(ATT)n	Simple_repeat	69	[1-69]	0.9855072463768116
comp14057_g1_i1	349	0.11174785100286533	(CTCTCT)n	Simple_repeat	39	[1-39]	0.9743589743589743
comp14061_g1_i1	297	0.09427609427609428	(TTTTA)n	Simple_repeat	30	[1-30]	0.9666666666666667
comp14072_g1_i1	608	0.08388157894736842	Mariner3-3_HSal/ClassII/TIR/Tc1-Mariner	Unspecified	4187	[161-212]	0.012180558872701218
comp14082_g1_i1	353	0.10764872521246459	(TTTAGTT)n	Simple_repeat	37	[1-37]	0.972972972972973
comp14084_g1_i1	321	0.1806853582554517	PREM1A_ZM_LTR	LTR/Gypsy	3408	[1587-1643]	0.01643192488262911
comp14091_g1_i1	1035	0.057971014492753624	Mariner-8_DRh/ClassII/TIR/Tc1-Mariner	Unspecified	1612	[364-424]	0.03722084367245657
comp14093_g1_i1	291	0.20618556701030927	(TTTAAT)n	Simple_repeat	60	[1-60]	0.9833333333333333
comp14102_g1_i1	269	0.12267657992565056	A-rich	Low_complexity	34	[1-34]	0.9705882352941176
comp14105_g1_i1	266	0.15789473684210525	DNA-like-1_Hmel/ClassII/?/?	Unspecified	248	[4-44]	0.16129032258064516
comp14110_g1_i1	797	0.04767879548306148	(TCGCC)n	Simple_repeat	39	[1-39]	0.9743589743589743
comp14111_g1_i1	302	0.10264900662251655	piggyBac-1_XT/ClassII/TIR/PiggyBac	Unspecified	6169	[2604-2635]	0.005025125628140704
comp14114_g1_i1	474	0.09071729957805907	A-rich	Low_complexity	45	[1-45]	0.9777777777777777
comp14115_g1_i1	324	0.08024691358024691	(T)n	Simple_repeat	27	[1-27]	0.9629629629629629
comp14129_g1_i1	607	0.09884678747940692	piggyBac-N1_DWil/ClassII/TIR/PiggyBac	Unspecified	658	[2-60]	0.08814589665653495
comp14140_g1_i1	721	0.059639389736477116	Mariner-14_DBp/ClassII/TIR/Tc1-Mariner	Unspecified	1287	[632-675]	0.03341103341103341
comp1414_g1_i1	232	0.14655172413793102	piggyBac-10_SM/ClassII/TIR/PiggyBac	Unspecified	2648	[2614-2648]	0.01283987915407855
comp14157_g1_i1	601	0.09650582362728785	(TCGATC)n	Simple_repeat	58	[1-58]	0.9827586206896551
comp14177_g1_i1	377	0.14588859416445624	Gypsy-171_ZM-I	LTR/Gypsy	4387	[3050-3105]	0.01253704125826305
comp14178_g1_i1	315	0.15555555555555556	(GCACGAT)n	Simple_repeat	49	[1-49]	0.9795918367346939
comp14186_g1_i1	325	0.18461538461538463	(TATAT)n	Simple_repeat	63	[1-63]	0.9841269841269841
comp14188_g1_i1	266	0.13157894736842105	(ATT)n	Simple_repeat	32	[1-32]	0.96875
comp1420_g1_i1	390	0.9615384615384616	GYPSY-I_MT	LTR/Gypsy	11810	[7797-8172]	0.03175275190516511
comp14213_g1_i1	400	0.0975	(TATAATAA)n	Simple_repeat	40	[1-40]	0.975
comp14216_g1_i1	322	0.11490683229813664	(TGAA)n	Simple_repeat	41	[1-41]	0.975609756097561
comp14217_g1_i1	252	0.09126984126984126	(TTAT)n	Simple_repeat	26	[1-26]	0.9615384615384616
comp14236_g1_i1	348	0.10057471264367816	TE-5_CGi/ClassII/?/?	Unspecified	988	[234-269]	0.0354251012145749
comp14244_g1_i1	266	0.19924812030075187	A-rich	Low_complexity	51	[1-51]	0.9803921568627451
comp14255_g1_i1	499	0.06613226452905811	(TACTA)n	Simple_repeat	35	[1-35]	0.9714285714285714
comp14256_g1_i1	280	0.15357142857142858	(TATATT)n	Simple_repeat	46	[1-46]	0.9782608695652174
comp14265_g1_i1	251	0.13147410358565736	Copia-1_DSe-I	LTR/Copia	4014	[3397-3430]	0.008221225710014948
comp14272_g1_i1	445	0.5078651685393258	(TTTCTG)n	Simple_repeat	245	[1-245]	0.9959183673469387
comp14275_g1_i1	283	0.0636042402826855	(G)n	Simple_repeat	19	[1-19]	0.9473684210526315
comp14281_g1_i1	293	0.19112627986348124	A-rich	Low_complexity	53	[1-53]	0.9811320754716981
comp14288_g1_i1	306	0.2908496732026144	SHALINE9_MT_	2	2968	[2463-2556]	0.03133423180592992
comp14289_g1_i1	571	0.521891418563923	R1-3_SIn	LINE/I	3583	[1839-1966]	0.035445157689087355
comp14296_g1_i1	263	0.17870722433460076	A-rich	Low_complexity	48	[1-48]	0.9791666666666666
comp14301_g1_i1	544	0.05514705882352941	(GAG)n	Simple_repeat	31	[1-31]	0.967741935483871
comp14325_g1_i1	203	0.21674876847290642	(GAAAA)n	Simple_repeat	45	[1-45]	0.9777777777777777
comp14327_g1_i1	394	0.12690355329949238	hAT-21_HM/ClassII/TIR/hAT	Unspecified	3338	[3055-3108]	0.015877771120431396
comp14329_g1_i1	405	0.1111111111111111	(AATATTAC)n	Simple_repeat	46	[1-46]	0.9782608695652174
comp14340_g1_i1	270	0.26666666666666666	(TAT)n	Simple_repeat	73	[1-73]	0.9863013698630136
comp14345_g1_i1	436	0.07568807339449542	(CCCCGT)n	Simple_repeat	35	[1-35]	0.9714285714285714
comp14353_g1_i1	385	0.07012987012987013	GA-rich	Low_complexity	28	[1-28]	0.9642857142857143
comp14359_g1_i1	408	0.06372549019607843	(TTTG)n	Simple_repeat	27	[1-27]	0.9629629629629629
comp1435_g1_i1	256	0.16015625	npiggyBac-1_EF/ClassII/TIR/PiggyBac	Unspecified	90	[1-42]	0.45555555555555555
comp14380_g1_i1	462	0.05844155844155844	(ATA)n	Simple_repeat	27	[1-27]	0.9629629629629629
comp14391_g1_i1	521	0.23224568138195778	GA-rich	Low_complexity	125	[1-125]	0.992
comp14399_g1_i1	419	0.08591885441527446	(ATTTA)n	Simple_repeat	37	[1-37]	0.972972972972973
comp1439_g1_i1	451	0.05321507760532151	(TTAA)n	Simple_repeat	25	[1-25]	0.96
comp14404_g1_i1	222	0.1981981981981982	(AGAA)n	Simple_repeat	46	[1-46]	0.9782608695652174
comp14405_g1_i1	333	0.996996996996997	Mariner-4_LMi/ClassII/TIR/Tc1-Mariner	Unspecified	1626	[344-677]	0.2047970479704797
comp14409_g1_i1	529	0.07750472589792061	Rehavkus-1_TC/ClassII/TIR/MuDR	Unspecified	9485	[7554-7597]	0.004533473906167633
comp14414_g1_i1	428	0.14719626168224298	GA-rich	Low_complexity	64	[1-64]	0.984375
comp14414_g2_i1	250	0.096	(ATAT)n	Simple_repeat	25	[1-25]	0.96
comp14424_g1_i1	424	0.11556603773584906	Mariner-3_AMi/ClassII/TIR/Tc1-Mariner	Unspecified	2522	[7-63]	0.022204599524187154
comp14426_g1_i1	509	0.05893909626719057	A-rich	Low_complexity	31	[1-31]	0.967741935483871
comp14441_g1_i1	289	0.08650519031141868	(TAAA)n	Simple_repeat	24	[1-24]	0.9583333333333334
comp14450_g1_i1	274	0.20437956204379562	(TATAA)n	Simple_repeat	57	[1-57]	0.9824561403508771
comp14452_g1_i1	726	0.06473829201101929	(ATT)n	Simple_repeat	47	[1-47]	0.9787234042553191
comp14460_g1_i1	320	0.159375	(AACGGAG)n	Simple_repeat	57	[1-57]	0.9824561403508771
comp14469_g1_i1	506	0.07114624505928854	(TCCAGTA)n	Simple_repeat	38	[1-38]	0.9736842105263158
comp14492_g1_i1	301	0.13953488372093023	BEL-3_Deu-I	LTR/Bel-Pao	5642	[1851-1893]	0.007444168734491315
comp14499_g1_i1	328	0.21646341463414634	Helitron-N23_LMi/ClassII/Helitron/Helitron	Unspecified	1374	[3-74]	0.05167394468704512
comp14500_g1_i1	810	0.3987654320987654	TART-A	LINE/Jockey	15576	[8657-8899]	0.015536723163841809
comp14504_g1_i1	357	0.08403361344537816	(TC)n	Simple_repeat	32	[1-32]	0.96875
comp14507_g1_i1	278	0.1223021582733813	(CGTTTGCG)n	Simple_repeat	35	[1-35]	0.9714285714285714
comp14511_g1_i1	501	0.08383233532934131	Gypsy-25_SP-I	LTR/Gypsy	6301	[2478-2519]	0.006506903666084749
comp14514_g1_i1	282	0.1099290780141844	(TCT)n	Simple_repeat	33	[1-33]	0.9696969696969697
comp14516_g1_i1	262	0.5534351145038168	Mariner-15_HM/ClassII/TIR/Tc1-Mariner	Unspecified	1793	[1118-1369]	0.1399888455103179
comp14518_g1_i1	482	0.23858921161825727	Mariner-18_HSal/ClassII/TIR/Tc1-Mariner	Unspecified	2291	[1-116]	0.0501964207769533
comp14524_g1_i1	317	0.20504731861198738	(TA)n	Simple_repeat	68	[1-68]	0.9852941176470589
comp14553_g1_i1	216	0.1527777777777778	piggyBac-N1_HSal/ClassII/TIR/PiggyBac	Unspecified	745	[712-745]	0.04429530201342282
comp14564_g1_i1	456	0.19736842105263158	HUCK1-I_ZM	LTR/Gypsy	10530	[9481-9568]	0.008262108262108263
comp14566_g1_i1	484	0.256198347107438	CR1_Ele9	LINE/Jockey	4924	[1039-1154]	0.023354995938261576
comp14571_g1_i1	277	0.11191335740072202	(TTCAT)n	Simple_repeat	33	[1-33]	0.9696969696969697
comp14572_g1_i1	540	0.05925925925925926	(CGG)n	Simple_repeat	33	[1-33]	0.9696969696969697
comp14579_g1_i1	266	0.21428571428571427	I_Ele2	LINE/I	6104	[1579-1630]	0.008355176933158584
comp14591_g1_i1	361	0.11634349030470914	(AATTAGC)n	Simple_repeat	44	[1-44]	0.9772727272727273
comp14602_g1_i1	290	0.1206896551724138	Copia-71_CCri-I	LTR/Copia	4118	[2455-2494]	0.00947061680427392
comp14605_g1_i1	422	0.13033175355450238	(TTGTGAG)n	Simple_repeat	60	[1-60]	0.9833333333333333
comp14619_g1_i1	339	0.10029498525073746	(TTATA)n	Simple_repeat	37	[1-37]	0.972972972972973
comp14621_g1_i1	511	0.03522504892367906	(TCT)n	Simple_repeat	19	[1-19]	0.9473684210526315
comp14656_g1_i1	287	0.21602787456445993	(AACAAC)n	Simple_repeat	63	[1-63]	0.9841269841269841
comp14657_g1_i1	255	0.16862745098039217	Copia-37_RC-I	LTR/Copia	4123	[1848-1893]	0.010914382731021102
comp14659_g1_i1	434	0.12211981566820276	(TTTATA)n	Simple_repeat	51	[1-51]	0.9803921568627451
comp14666_g1_i1	596	0.05704697986577181	A-rich	Low_complexity	36	[1-36]	0.9722222222222222
comp14668_g1_i1	445	0.0853932584269663	Helitron-1_DK/ClassII/Helitron/Helitron	Unspecified	5860	[4452-4496]	0.007508532423208191
comp14669_g1_i1	313	0.19808306709265175	(TTATAC)n	Simple_repeat	62	[1-62]	0.9838709677419355
comp14676_g1_i1	717	0.06555090655509066	GA-rich	Low_complexity	48	[1-48]	0.9791666666666666
comp14686_g1_i1	506	0.383399209486166	Mariner-89_HSal/ClassII/TIR/Tc1-Mariner	Unspecified	1605	[937-1134]	0.12274143302180686
comp14695_g1_i1	617	0.04213938411669368	(CCTT)n	Simple_repeat	28	[1-28]	0.9642857142857143
comp14702_g1_i1	606	0.09405940594059406	Helitron-1_DR/ClassII/Helitron/Helitron	Unspecified	26300	[6325-6385]	0.0022813688212927757
comp14707_g1_i1	561	0.05169340463458111	(CG)n	Simple_repeat	34	[1-34]	0.9705882352941176
comp14708_g1_i1	304	0.10526315789473684	(CGCG)n	Simple_repeat	33	[1-33]	0.9696969696969697
comp14713_g1_i1	448	0.17410714285714285	GA-rich	Low_complexity	79	[1-79]	0.9873417721518988
comp14714_g1_i1	270	0.14444444444444443	(TTA)n	Simple_repeat	42	[1-42]	0.9761904761904762
comp14726_g1_i1	529	0.08506616257088846	A-rich	Low_complexity	45	[1-45]	0.9777777777777777
comp14728_g1_i1	395	0.07088607594936709	(CTCT)n	Simple_repeat	29	[1-29]	0.9655172413793104
comp14730_g1_i1	595	0.11428571428571428	(TTCGAA)n	Simple_repeat	72	[1-72]	0.9861111111111112
comp14736_g1_i1	260	0.3269230769230769	Kolobok-N1_AEc/ClassII/?/Kolobok	Unspecified	8251	[4713-4791]	0.009453399587928736
comp14741_g1_i1	254	0.2047244094488189	(ATTTTGA)n	Simple_repeat	54	[1-54]	0.9814814814814815
comp14744_g1_i1	347	0.14697406340057637	(AATTTA)n	Simple_repeat	48	[1-48]	0.9791666666666666
comp14752_g1_i1	412	0.12135922330097088	A-rich	Low_complexity	50	[1-50]	0.98
comp14765_g1_i1	689	0.05805515239477504	(TC)n	Simple_repeat	42	[1-42]	0.9761904761904762
comp14767_g1_i1	318	0.059748427672955975	(AT)n	Simple_repeat	20	[1-20]	0.95
comp1476_g1_i1	500	0.036	(TA)n	Simple_repeat	19	[1-19]	0.9473684210526315
comp14770_g1_i1	265	0.21132075471698114	(ATTTATT)n	Simple_repeat	52	[1-52]	0.9807692307692307
comp14779_g1_i1	369	0.3604336043360434	SMAR25B/ClassII/TIR/Tc1-Mariner	Unspecified	2662	[7-131]	0.04658151765589782
comp1477_g1_i1	573	0.1099476439790576	MuDR-11_SBi/ClassII/TIR/MuDR	Unspecified	3255	[844-911]	0.020583717357910907
comp1477_g1_i2	508	0.12401574803149606	MuDR-11_SBi/ClassII/TIR/MuDR	Unspecified	3255	[844-911]	0.020583717357910907
comp14784_g1_i1	254	0.14960629921259844	(ATTTCAG)n	Simple_repeat	37	[1-37]	0.972972972972973
comp14795_g1_i1	606	0.7442244224422442	DNA-1_CQ/ClassII/?/?	Unspecified	3260	[1309-1766]	0.1401840490797546
comp14799_g1_i1	254	0.1220472440944882	(AATA)n	Simple_repeat	30	[1-30]	0.9666666666666667
comp14800_g1_i1	389	0.20051413881748073	GA-rich	Low_complexity	76	[1-76]	0.9868421052631579
comp14825_g1_i1	463	0.183585313174946	(CT)n	Simple_repeat	86	[1-86]	0.9883720930232558
comp14828_g1_i1	218	0.14220183486238533	(AC)n	Simple_repeat	35	[1-35]	0.9714285714285714
comp14836_g1_i1	263	0.08365019011406843	(CCG)n	Simple_repeat	23	[1-23]	0.9565217391304348
comp14838_g1_i1	474	0.1540084388185654	GA-rich	Low_complexity	71	[1-71]	0.9859154929577465
comp14840_g1_i1	1259	0.08816521048451152	L1-58_ACar	LINE/L1	6685	[6400-6506]	0.01585639491398654
comp14842_g1_i1	496	0.3467741935483871	R2_DA	LINE/R2	1785	[13-152]	0.07787114845938375
comp14845_g1_i1	395	0.09367088607594937	(TTGATAAT)n	Simple_repeat	41	[1-41]	0.975609756097561
comp14855_g1_i1	372	0.9946236559139785	Gypsy-17_DWil-I	LTR/Gypsy	4717	[2576-2899]	0.06847572609709561
comp14860_g1_i1	344	0.17151162790697674	(TAA)n	Simple_repeat	55	[1-55]	0.9818181818181818
comp14864_g1_i1	253	0.18972332015810275	(GACGGCT)n	Simple_repeat	46	[1-46]	0.9782608695652174
comp14866_g1_i1	518	0.14092664092664092	(GAAAACGAAA)n	Simple_repeat	74	[1-74]	0.9864864864864865
comp1486_g1_i1	237	0.26582278481012656	Gypsy10-LTR_SP	LTR/Gypsy	2430	[1254-1368]	0.04691358024691358
comp14874_g1_i1	344	0.125	(TTTCTAA)n	Simple_repeat	45	[1-45]	0.9777777777777777
comp14876_g1_i1	338	0.1804733727810651	piggyBac-N1_DWil/ClassII/TIR/PiggyBac	Unspecified	658	[1-60]	0.08966565349544073
comp14877_g1_i1	678	0.1592920353982301	Mariner-74_HSal/ClassII/TIR/Tc1-Mariner	Unspecified	1295	[1178-1293]	0.0888030888030888
comp14880_g1_i1	554	0.06859205776173286	(GTTTCTA)n	Simple_repeat	42	[1-42]	0.9761904761904762
comp14884_g1_i1	294	0.09863945578231292	(T)n	Simple_repeat	30	[1-30]	0.9666666666666667
comp14886_g1_i1	258	0.1434108527131783	A-rich	Low_complexity	39	[1-39]	0.9743589743589743
comp14889_g1_i1	309	0.10679611650485436	A-rich	Low_complexity	33	[1-33]	0.9696969696969697
comp14897_g1_i1	225	0.14666666666666667	(CGAGA)n	Simple_repeat	34	[1-34]	0.9705882352941176
comp14899_g1_i1	267	0.07865168539325842	(CT)n	Simple_repeat	22	[1-22]	0.9545454545454546
comp1489_g1_i1	731	0.19425444596443228	Mariner-3_PBa/ClassII/TIR/Tc1-Mariner	Unspecified	1281	[729-885]	0.12177985948477751
comp14901_g1_i1	262	0.17557251908396945	A-rich	Low_complexity	47	[1-47]	0.9787234042553191
comp14906_g1_i1	315	0.06031746031746032	(GA)n	Simple_repeat	20	[1-20]	0.95
comp1491_g2_i1	303	0.1353135313531353	(ATA)n	Simple_repeat	43	[1-43]	0.9767441860465116
comp14921_g1_i1	300	0.13333333333333333	(AT)n	Simple_repeat	40	[1-40]	0.975
comp14933_g1_i1	262	0.12595419847328243	(TA)n	Simple_repeat	34	[1-34]	0.9705882352941176
comp14943_g1_i1	543	0.06813996316758748	(TCGCCC)n	Simple_repeat	38	[1-38]	0.9736842105263158
comp14951_g1_i1	251	0.11155378486055777	(CATTT)n	Simple_repeat	29	[1-29]	0.9655172413793104
comp14960_g1_i1	688	0.15988372093023256	(TAATAA)n	Simple_repeat	106	[1-106]	0.9905660377358491
comp14967_g1_i1	519	0.08477842003853564	(AATAC)n	Simple_repeat	49	[1-49]	0.9795918367346939
comp1496_g1_i1	393	0.04834605597964377	(A)n	Simple_repeat	20	[1-20]	0.95
comp14980_g1_i1	214	0.14018691588785046	(GGA)n	Simple_repeat	31	[1-31]	0.967741935483871
comp14982_g1_i1	229	0.2096069868995633	(CCGCA)n	Simple_repeat	49	[1-49]	0.9795918367346939
comp14985_g1_i1	367	0.1226158038147139	hAT-N2_LMi/ClassII/TIR/hAT	Unspecified	4133	[1240-1285]	0.010887974836680378
comp14989_g1_i1	347	0.07780979827089338	(CGTGT)n	Simple_repeat	28	[1-28]	0.9642857142857143
comp15000_g1_i1	466	0.07725321888412018	(TTACA)n	Simple_repeat	39	[1-39]	0.9743589743589743
comp15030_g1_i1	404	0.07673267326732673	(AACTGA)n	Simple_repeat	33	[1-33]	0.9696969696969697
comp15033_g1_i1	570	0.1368421052631579	LTR-1_GA-I	LTR/?	14536	[13382-13469]	0.005985140341221794
comp15036_g1_i1	577	0.10918544194107452	(AGATTTT)n	Simple_repeat	64	[1-64]	0.984375
comp15038_g1_i1	767	0.45632333767926986	R1B_NVi	LINE/I	6140	[1717-2070]	0.05749185667752443
comp15047_g1_i1	639	0.081377151799687	(ATATT)n	Simple_repeat	50	[1-50]	0.98
comp15051_g1_i1	256	0.14453125	(TTCAAT)n	Simple_repeat	37	[1-37]	0.972972972972973
comp15053_g1_i1	301	0.09302325581395349	(GGGAA)n	Simple_repeat	28	[1-28]	0.9642857142857143
comp15054_g1_i1	394	0.09898477157360407	(TCAATTA)n	Simple_repeat	39	[1-39]	0.9743589743589743
comp15062_g1_i1	309	0.1650485436893204	(TCTC)n	Simple_repeat	52	[1-52]	0.9807692307692307
comp15073_g1_i1	434	0.1175115207373272	Gypsy14-LTR_Dpse	LTR/Gypsy	1179	[126-174]	0.04071246819338423
comp15074_g1_i1	520	0.3269230769230769	Mariner-N26_HSal/ClassII/TIR/Tc1-Mariner	Unspecified	1091	[32-203]	0.15673693858845097
comp15088_g1_i1	1188	0.05976430976430976	Proto2-4_CTe	LINE/RTE	1803	[673-741]	0.03771491957848031
comp150_g1_i1	623	0.09470304975922954	(AAT)n	Simple_repeat	62	[1-62]	0.9838709677419355
comp15116_g1_i1	394	0.24619289340101522	GA-rich	Low_complexity	95	[1-95]	0.9894736842105263
comp15117_g1_i1	331	0.229607250755287	Mariner-4_LMi/ClassII/TIR/Tc1-Mariner	Unspecified	1626	[1550-1626]	0.046740467404674045
comp15122_g1_i1	496	0.1350806451612903	(TTTACT)n	Simple_repeat	65	[1-65]	0.9846153846153847
comp15132_g1_i1	421	0.5106888361045131	Mariner-13_AEc/ClassII/TIR/Tc1-Mariner	Unspecified	1300	[1-236]	0.18076923076923077
comp15136_g1_i1	279	0.13261648745519714	(CTCG)n	Simple_repeat	42	[1-42]	0.9761904761904762
comp15141_g1_i1	257	0.19066147859922178	(CGCGC)n	Simple_repeat	49	[1-49]	0.9795918367346939
comp15142_g1_i1	253	0.20948616600790515	(TTAATAA)n	Simple_repeat	54	[1-54]	0.9814814814814815
comp15143_g1_i1	557	0.06463195691202872	(GAATC)n	Simple_repeat	37	[1-37]	0.972972972972973
comp15147_g1_i1	783	0.16091954022988506	(TATAT)n	Simple_repeat	126	[1-126]	0.9920634920634921
comp15149_g1_i1	395	0.1291139240506329	G-rich	Low_complexity	52	[1-52]	0.9807692307692307
comp15152_g1_i1	428	0.04672897196261682	(CGAG)n	Simple_repeat	21	[1-21]	0.9523809523809523
comp15155_g1_i1	283	0.10954063604240283	A-rich	Low_complexity	33	[1-33]	0.9696969696969697
comp15158_g1_i1	397	0.10579345088161209	(TCGC)n	Simple_repeat	44	[1-44]	0.9772727272727273
comp1516_g1_i1	283	0.07773851590106007	(AT)n	Simple_repeat	23	[1-23]	0.9565217391304348
comp15183_g1_i1	437	0.2334096109839817	A-rich	Low_complexity	104	[1-104]	0.9903846153846154
comp15187_g1_i1	210	0.1	(CT)n	Simple_repeat	22	[1-22]	0.9545454545454546
comp15193_g1_i1	337	0.14836795252225518	Tc1-1_DR/ClassII/TIR/Tc1-Mariner	Unspecified	1625	[742-792]	0.03076923076923077
comp15198_g1_i1	422	0.07345971563981042	DNA35_Lch/ClassII/TIR/Tc1-Mariner	Unspecified	1136	[1105-1136]	0.027288732394366196
comp15216_g1_i1	277	0.3176895306859206	(TAATAT)n	Simple_repeat	87	[1-87]	0.9885057471264368
comp15223_g1_i1	952	0.051470588235294115	(TA)n	Simple_repeat	55	[1-55]	0.9818181818181818
comp15225_g1_i1	302	0.17218543046357615	(TCTCTT)n	Simple_repeat	57	[1-57]	0.9824561403508771
comp1522_g1_i1	740	0.22162162162162163	MARIAM1/ClassII/TIR/Tc1-Mariner	Unspecified	1284	[1119-1284]	0.12850467289719625
comp15237_g1_i1	279	0.15770609318996415	G-rich	Low_complexity	45	[1-45]	0.9777777777777777
comp15242_g1_i1	388	0.20103092783505155	npiggyBac-7_Hmel/ClassII/TIR/PiggyBac	Unspecified	468	[390-464]	0.1581196581196581
comp15245_g1_i1	347	0.15561959654178675	(TAC)n	Simple_repeat	55	[1-55]	0.9818181818181818
comp15246_g1_i1	449	0.11581291759465479	LINE1-14_ZM	LINE/L1	4953	[2877-2931]	0.010902483343428226
comp15257_g1_i1	257	0.4669260700389105	R1-2_DK	LINE/I	3679	[3150-3270]	0.0326175591193259
comp15264_g1_i1	238	0.12605042016806722	A-rich	Low_complexity	31	[1-31]	0.967741935483871
comp15264_g2_i1	249	0.10441767068273092	(GAGC)n	Simple_repeat	27	[1-27]	0.9629629629629629
comp1526_g1_i1	360	0.10555555555555556	(ATTAA)n	Simple_repeat	38	[1-38]	0.9736842105263158
comp15272_g1_i1	268	0.15671641791044777	piggyBac-N1_HSal/ClassII/TIR/PiggyBac	Unspecified	745	[703-745]	0.056375838926174496
comp15273_g1_i1	259	0.14285714285714285	G-rich	Low_complexity	37	[1-37]	0.972972972972973
comp15279_g1_i1	858	0.05827505827505827	(ATAATGT)n	Simple_repeat	53	[1-53]	0.9811320754716981
comp15290_g1_i1	358	0.12569832402234637	(CCTT)n	Simple_repeat	47	[1-47]	0.9787234042553191
comp15294_g1_i1	207	0.09178743961352658	(T)n	Simple_repeat	20	[1-20]	0.95
comp15297_g1_i1	328	0.11280487804878049	ERV3_DR-I	LTR/ERV	9338	[8081-8118]	0.003962304562004712
comp15301_g1_i1	490	0.9816326530612245	Gypsy-53_DWil-I	LTR/Gypsy	4892	[3518-4019]	0.10241210139002453
comp15308_g1_i1	253	0.11067193675889328	(CGAG)n	Simple_repeat	29	[1-29]	0.9655172413793104
comp15313_g1_i1	249	0.15261044176706828	(ACGA)n	Simple_repeat	39	[1-39]	0.9743589743589743
comp15314_g1_i1	287	0.0975609756097561	LTR15D_OC	LTR/ERV	368	[71-99]	0.07608695652173914
comp15319_g1_i1	595	0.06890756302521009	(TTTCAA)n	Simple_repeat	41	[1-41]	0.975609756097561
comp15325_g1_i1	339	0.12979351032448377	A-rich	Low_complexity	44	[1-44]	0.9772727272727273
comp15326_g1_i1	261	0.1724137931034483	A-rich	Low_complexity	44	[1-44]	0.9772727272727273
comp15333_g1_i1	276	0.10507246376811594	(ATCAA)n	Simple_repeat	29	[1-29]	0.9655172413793104
comp15334_g1_i1	237	0.09282700421940929	(GA)n	Simple_repeat	23	[1-23]	0.9565217391304348
comp15340_g1_i1	412	0.14805825242718446	(TCTCCC)n	Simple_repeat	59	[1-59]	0.9830508474576272
comp15346_g1_i1	360	0.1388888888888889	(TATTTA)n	Simple_repeat	51	[1-51]	0.9803921568627451
comp15347_g1_i1	303	0.06930693069306931	A-rich	Low_complexity	81	[1-55]	0.6666666666666666
comp15364_g1_i1	426	0.09859154929577464	(AATTAT)n	Simple_repeat	44	[1-44]	0.9772727272727273
comp15373_g1_i1	288	0.16666666666666666	(TA)n	Simple_repeat	49	[1-49]	0.9795918367346939
comp1537_g1_i1	703	0.12375533428165007	(TAATT)n	Simple_repeat	84	[1-84]	0.9880952380952381
comp15381_g1_i1	424	0.2688679245283019	Mariner-N2_ACe/ClassII/TIR/Tc1-Mariner	Unspecified	656	[432-550]	0.1798780487804878
comp15387_g1_i1	477	0.08176100628930817	RILN8_OS	?/?	5085	[4742-4782]	0.007866273352999017
comp15399_g1_i1	229	0.1615720524017467	(AG)n	Simple_repeat	38	[1-38]	0.9736842105263158
comp15404_g1_i1	278	0.08273381294964029	(AG)n	Simple_repeat	24	[1-24]	0.9583333333333334
comp15404_g2_i1	434	0.1382488479262673	hAT-9_ATr/ClassII/TIR/hAT	Unspecified	7724	[5586-5646]	0.007767995857068877
comp15406_g1_i1	534	0.09363295880149813	(ATATTAA)n	Simple_repeat	52	[1-52]	0.9807692307692307
comp15410_g1_i1	242	0.128099173553719	(AAC)n	Simple_repeat	32	[1-32]	0.96875
comp15411_g1_i1	339	0.0471976401179941	(A)n	Simple_repeat	17	[1-17]	0.9411764705882353
comp15422_g1_i1	747	0.07095046854082998	(TTTAGTG)n	Simple_repeat	54	[1-54]	0.9814814814814815
comp15425_g1_i1	263	0.3916349809885932	Mariner3-3_HSal/ClassII/TIR/Tc1-Mariner	Unspecified	4187	[141-247]	0.02531645569620253
comp15427_g1_i1	319	0.08150470219435736	(CT)n	Simple_repeat	27	[1-27]	0.9629629629629629
comp15428_g1_i1	758	0.079155672823219	CR1-1_HMM	LINE/Jockey	2142	[1233-1293]	0.028011204481792718
comp15432_g1_i1	263	0.9847908745247148	Gypsy-24_PBa-I	LTR/Gypsy	7703	[6372-6725]	0.045826301440997017
comp15439_g1_i1	359	0.08913649025069638	piggyBac-N1_HSal/ClassII/TIR/PiggyBac	Unspecified	745	[711-745]	0.04563758389261745
comp15442_g1_i1	319	0.3166144200626959	(ATATATA)n	Simple_repeat	112	[1-112]	0.9910714285714286
comp15445_g1_i1	577	0.05025996533795494	(AT)n	Simple_repeat	32	[1-32]	0.96875
comp1545_g1_i1	301	0.18272425249169436	(TTA)n	Simple_repeat	54	[1-54]	0.9814814814814815
comp15468_g1_i1	467	0.0728051391862955	(TTTC)n	Simple_repeat	35	[1-35]	0.9714285714285714
comp15472_g1_i1	291	0.9828178694158075	GYPSY-I_MT	LTR/Gypsy	11810	[1713-1999]	0.024216765453005926
comp15492_g1_i1	606	0.066006600660066	Mariner-5_DBp/ClassII/TIR/Tc1-Mariner	Unspecified	1638	[359-398]	0.023809523809523808
comp15509_g1_i1	1231	0.03411860276198213	(TTCT)n	Simple_repeat	43	[1-43]	0.9767441860465116
comp15510_g1_i1	559	0.07155635062611806	(CTGATAA)n	Simple_repeat	39	[1-39]	0.9743589743589743
comp15520_g1_i1	533	0.043151969981238276	(AAT)n	Simple_repeat	24	[1-24]	0.9583333333333334
comp15527_g1_i1	347	0.4265129682997118	R1-1_AEc	LINE/I	3994	[1443-1590]	0.036805207811717575
comp15534_g1_i1	661	0.048411497730711045	(TACATT)n	Simple_repeat	34	[1-34]	0.9705882352941176
comp15539_g1_i1	250	0.144	(TACTAT)n	Simple_repeat	36	[1-36]	0.9722222222222222
comp1554_g1_i1	269	0.4684014869888476	Chapaev3-5_HM/ClassII/?/Chapaev	Unspecified	2555	[2-138]	0.05322896281800391
comp15555_g1_i1	371	0.18328840970350405	(AGAGT)n	Simple_repeat	73	[1-73]	0.9863013698630136
comp1555_g1_i1	212	0.15566037735849056	(AATTC)n	Simple_repeat	33	[1-33]	0.9696969696969697
comp15560_g1_i1	344	0.09011627906976744	(TA)n	Simple_repeat	33	[1-33]	0.9696969696969697
comp15570_g1_i1	516	0.08527131782945736	Kolobok-N1_AEc/ClassII/?/Kolobok	Unspecified	8251	[4713-4757]	0.005332686947036723
comp15571_g1_i1	497	0.16297786720321933	(TATTAA)n	Simple_repeat	76	[1-76]	0.9868421052631579
comp15572_g1_i1	275	0.14181818181818182	(TATTTA)n	Simple_repeat	39	[1-39]	0.9743589743589743
comp15577_g1_i1	242	0.1322314049586777	GA-rich	Low_complexity	34	[1-34]	0.9705882352941176
comp155_g1_i1	270	0.6333333333333333	R1B_NVi	LINE/I	6140	[2164-2332]	0.02736156351791531
comp15602_g1_i1	516	0.08139534883720931	(TCTC)n	Simple_repeat	42	[1-42]	0.9761904761904762
comp15603_g1_i1	257	0.5525291828793775	Mariner-N32_HSal/ClassII/TIR/Tc1-Mariner	Unspecified	583	[191-342]	0.25900514579759865
comp15606_g1_i1	259	0.8532818532818532	HELITRON7_CB/ClassII/Helitron/Helitron	Unspecified	1381	[557-779]	0.16075307748008688
comp15610_g1_i1	532	0.3176691729323308	NeSL-1_CBri	LINE/R2	3562	[310-490]	0.05053340819764177
comp15610_g2_i1	216	0.9583333333333334	DNA-1_CQ/ClassII/?/?	Unspecified	3260	[1285-1491]	0.06319018404907975
comp15620_g1_i1	529	0.07939508506616257	(TTATA)n	Simple_repeat	42	[1-42]	0.9761904761904762
comp15629_g1_i1	402	0.07711442786069651	GA-rich	Low_complexity	32	[1-32]	0.96875
comp15633_g1_i1	856	0.29205607476635514	(ATAA)n	Simple_repeat	237	[1-237]	0.9957805907172996
comp15649_g1_i1	296	0.12837837837837837	hAT-5_DRh/ClassII/TIR/hAT	Unspecified	2022	[71-109]	0.018793273986152326
comp15650_g1_i1	297	0.1111111111111111	(AACCA)n	Simple_repeat	33	[1-33]	0.9696969696969697
comp15656_g1_i1	245	0.14285714285714285	piggyBac-N1_DWil/ClassII/TIR/PiggyBac	Unspecified	658	[1-36]	0.05319148936170213
comp15665_g1_i1	269	0.22304832713754646	piggyBac-N1_DWil/ClassII/TIR/PiggyBac	Unspecified	658	[1-59]	0.08814589665653495
comp15667_g1_i1	288	0.11458333333333333	(CGCGA)n	Simple_repeat	33	[1-33]	0.9696969696969697
comp15671_g1_i1	255	0.1411764705882353	(TATTTA)n	Simple_repeat	35	[1-35]	0.9714285714285714
comp15673_g1_i1	479	0.08977035490605428	(ATTTATA)n	Simple_repeat	41	[1-41]	0.975609756097561
comp15683_g1_i1	291	0.20618556701030927	(CTCT)n	Simple_repeat	62	[1-62]	0.9838709677419355
comp15695_g1_i1	283	0.13074204946996468	(CGT)n	Simple_repeat	38	[1-38]	0.9736842105263158
comp15696_g1_i1	724	0.04005524861878453	(GCGGC)n	Simple_repeat	30	[1-30]	0.9666666666666667
comp15704_g1_i1	514	0.14591439688715954	GA-rich	Low_complexity	78	[1-78]	0.9871794871794872
comp15705_g1_i1	546	0.08424908424908426	DNA8-2_EL/ClassII/?/?	Unspecified	898	[178-224]	0.051224944320712694
comp1570_g1_i2	483	0.15942028985507245	Mariner-13_AEc/ClassII/TIR/Tc1-Mariner	Unspecified	1300	[1-78]	0.05923076923076923
comp1570_g2_i1	278	0.9784172661870504	Mariner-13_AEc/ClassII/TIR/Tc1-Mariner	Unspecified	1300	[86-360]	0.21076923076923076
comp15711_g1_i1	626	0.11182108626198083	(ATATTT)n	Simple_repeat	75	[1-75]	0.9866666666666667
comp15712_g1_i1	340	0.12941176470588237	CR1-7_SP	LINE/Jockey	2856	[26-72]	0.01610644257703081
comp15713_g1_i1	441	0.061224489795918366	GA-rich	Low_complexity	27	[1-27]	0.9629629629629629
comp15719_g1_i1	447	0.11409395973154363	(ATTT)n	Simple_repeat	51	[1-51]	0.9803921568627451
comp15733_g1_i1	670	0.08656716417910448	(GAATAA)n	Simple_repeat	59	[1-59]	0.9830508474576272
comp15734_g1_i1	277	0.24548736462093862	(TTATT)n	Simple_repeat	62	[1-62]	0.9838709677419355
comp15739_g1_i1	432	0.12268518518518519	(AATATA)n	Simple_repeat	53	[1-53]	0.9811320754716981
comp15745_g1_i1	384	0.453125	(AATA)n	Simple_repeat	168	[1-168]	0.9940476190476191
comp15784_g1_i1	520	0.08461538461538462	GA-rich	Low_complexity	43	[1-43]	0.9767441860465116
comp15794_g1_i1	220	0.09090909090909091	(A)n	Simple_repeat	21	[1-21]	0.9523809523809523
comp15803_g1_i1	474	0.08860759493670886	piggyBac-N1_HSal/ClassII/TIR/PiggyBac	Unspecified	745	[703-745]	0.056375838926174496
comp15810_g1_i1	273	0.10622710622710622	(AG)n	Simple_repeat	30	[1-30]	0.9666666666666667
comp15818_g1_i1	299	0.20735785953177258	Gypsy-7_CP-I	LTR/Gypsy	6424	[1679-1747]	0.010585305105853052
comp15829_g1_i1	418	0.21052631578947367	Gypsy41-I_DR	LTR/Gypsy	5057	[238-318]	0.015819655922483685
comp15833_g1_i1	655	0.07938931297709924	(GC)n	Simple_repeat	54	[1-54]	0.9814814814814815
comp15834_g1_i1	572	0.08216783216783216	(CGGAGA)n	Simple_repeat	47	[1-47]	0.9787234042553191
comp15839_g1_i1	251	0.09163346613545817	(TC)n	Simple_repeat	24	[1-24]	0.9583333333333334
comp15841_g1_i1	208	0.16826923076923078	(TATTAA)n	Simple_repeat	35	[1-35]	0.9714285714285714
comp15854_g1_i1	683	0.16691068814055637	Gypsy-3_DPu-I	LTR/Gypsy	8217	[659-774]	0.013995375441158574
comp1585_g1_i1	578	0.06747404844290658	(CAATT)n	Simple_repeat	37	[1-37]	0.972972972972973
comp15864_g1_i1	462	0.0735930735930736	A-rich	Low_complexity	36	[1-36]	0.9722222222222222
comp15872_g1_i1	293	0.2150170648464164	GA-rich	Low_complexity	66	[1-66]	0.9848484848484849
comp15880_g1_i1	288	0.9965277777777778	Mariner-13_AEc/ClassII/TIR/Tc1-Mariner	Unspecified	1300	[30-337]	0.23615384615384616
comp15881_g1_i1	618	0.05825242718446602	(TAA)n	Simple_repeat	37	[1-37]	0.972972972972973
comp15882_g1_i1	299	0.14715719063545152	Gypsy-15_ATr-I	LTR/Gypsy	13946	[10717-10761]	0.003155026530904919
comp15885_g1_i1	257	0.7042801556420234	Mariner-7_HSal/ClassII/TIR/Tc1-Mariner	Unspecified	1290	[532-724]	0.14883720930232558
comp15889_g1_i1	477	0.09853249475890985	(AAT)n	Simple_repeat	45	[1-45]	0.9777777777777777
comp15893_g1_i1	514	0.07003891050583658	(CTCTCT)n	Simple_repeat	37	[1-37]	0.972972972972973
comp15902_g1_i1	320	0.196875	(AAT)n	Simple_repeat	64	[1-64]	0.984375
comp15903_g1_i1	263	0.19391634980988592	(AACACATC)n	Simple_repeat	52	[1-52]	0.9807692307692307
comp15908_g1_i1	261	0.12643678160919541	(GCG)n	Simple_repeat	32	[1-32]	0.96875
comp15913_g1_i1	520	0.05384615384615385	(CAA)n	Simple_repeat	29	[1-29]	0.9655172413793104
comp15921_g1_i1	854	0.06088992974238876	DNA-8N1_HSal/ClassII/?/?	Unspecified	816	[409-457]	0.058823529411764705
comp15929_g1_i1	450	0.17333333333333334	(AGATTGGT)n	Simple_repeat	79	[1-79]	0.9873417721518988
comp15933_g1_i1	730	0.036986301369863014	(AG)n	Simple_repeat	29	[1-29]	0.9655172413793104
comp15934_g1_i1	388	0.09020618556701031	Mariner-32_SM/ClassII/TIR/Tc1-Mariner	Unspecified	2346	[2311-2346]	0.014919011082693947
comp15938_g1_i1	398	0.07035175879396985	(GC)n	Simple_repeat	30	[1-30]	0.9666666666666667
comp15943_g1_i1	457	0.8643326039387309	Mariner-13_AEc/ClassII/TIR/Tc1-Mariner	Unspecified	1300	[22-419]	0.30538461538461537
comp15944_g1_i1	355	0.14084507042253522	A-rich	Low_complexity	47	[1-47]	0.9787234042553191
comp15957_g1_i1	749	0.10013351134846461	(AATGAT)n	Simple_repeat	78	[1-78]	0.9871794871794872
comp15988_g1_i1	303	0.15841584158415842	A-rich	Low_complexity	50	[1-50]	0.98
comp1598_g1_i1	413	0.09927360774818401	EnSpm-2_ADi/ClassII/TIR/CACTA	Unspecified	6992	[3439-3480]	0.0058638443935926775
comp15990_g1_i1	600	0.11333333333333333	Mariner-32_HSal/ClassII/TIR/Tc1-Mariner	Unspecified	1277	[1095-1164]	0.05403288958496476
comp15991_g1_i1	537	0.11359404096834265	Gypsy-125_MLP-I	LTR/Gypsy	5946	[143-201]	0.009754456777665657
comp15993_g1_i1	321	0.12461059190031153	(TTCTG)n	Simple_repeat	41	[1-41]	0.975609756097561
comp15994_g1_i1	476	0.07983193277310924	(TAGATG)n	Simple_repeat	39	[1-39]	0.9743589743589743
comp16007_g1_i1	398	0.05527638190954774	(G)n	Simple_repeat	23	[1-23]	0.9565217391304348
comp16009_g1_i1	252	0.15079365079365079	(TAA)n	Simple_repeat	37	[1-37]	0.972972972972973
comp1600_g1_i1	300	0.12	(ATCCATG)n	Simple_repeat	41	[1-41]	0.975609756097561
comp16015_g1_i1	332	0.10240963855421686	(TTTGAG)n	Simple_repeat	34	[1-34]	0.9705882352941176
comp16024_g1_i1	538	0.0724907063197026	(TA)n	Simple_repeat	42	[1-42]	0.9761904761904762
comp16040_g1_i1	757	0.07661822985468957	(TATTAA)n	Simple_repeat	61	[1-61]	0.9836065573770492
comp16051_g1_i1	236	0.2330508474576271	Helitron-2_CRe/ClassII/Helitron/Helitron	Unspecified	23720	[23463-23519]	0.002360876897133221
comp16053_g1_i1	475	0.07157894736842105	(TTA)n	Simple_repeat	34	[1-34]	0.9705882352941176
comp16061_g1_i1	842	0.12589073634204276	EnSpm-N25_DR/ClassII/TIR/CACTA	Unspecified	4686	[2361-2508]	0.03137003841229193
comp16073_g1_i1	515	0.03495145631067961	(GC)n	Simple_repeat	19	[1-19]	0.9473684210526315
comp16090_g1_i1	341	0.1466275659824047	(TGGAGG)n	Simple_repeat	51	[1-51]	0.9803921568627451
comp16126_g1_i1	253	0.09090909090909091	(TTTTCT)n	Simple_repeat	90	[3-90]	0.9666666666666667
comp16168_g1_i1	466	0.2145922746781116	Mariner3-2_HSal/ClassII/TIR/Tc1-Mariner	Unspecified	2185	[26-124]	0.044851258581235696
comp16186_g1_i1	252	0.34523809523809523	(AAT)n	Simple_repeat	85	[1-85]	0.9882352941176471
comp16197_g1_i1	250	0.1	(AAT)n	Simple_repeat	24	[1-24]	0.9583333333333334
comp16198_g1_i1	260	0.25769230769230766	(ATATAA)n	Simple_repeat	69	[1-69]	0.9855072463768116
comp1620_g1_i1	320	0.13125	npiggyBac-1_EF/ClassII/TIR/PiggyBac	Unspecified	90	[1-43]	0.4666666666666667
comp1620_g2_i1	294	0.14285714285714285	npiggyBac-1_EF/ClassII/TIR/PiggyBac	Unspecified	90	[1-43]	0.4666666666666667
comp16225_g1_i1	255	0.07058823529411765	(AGA)n	Simple_repeat	19	[1-19]	0.9473684210526315
comp16228_g1_i1	518	0.1640926640926641	(TATTAT)n	Simple_repeat	82	[1-82]	0.9878048780487805
comp16230_g1_i1	661	0.07261724659606657	(TAATA)n	Simple_repeat	49	[1-49]	0.9795918367346939
comp16232_g1_i1	459	0.06753812636165578	Gypsy-246_AA-I	LTR/Gypsy	4416	[2964-2996]	0.007246376811594203
comp16240_g1_i1	268	0.13805970149253732	Gypsy-6_MLP-I	LTR/Gypsy	8604	[4489-4528]	0.004532775453277545
comp16242_g1_i1	409	0.10268948655256724	(GGTGGC)n	Simple_repeat	43	[1-43]	0.9767441860465116
comp16252_g1_i1	543	0.10497237569060773	Gypsy-61_GA-I	LTR/Gypsy	5469	[827-886]	0.010788078259279577
comp16276_g1_i1	306	0.18627450980392157	(AGGCTTG)n	Simple_repeat	58	[1-58]	0.9827586206896551
comp16278_g1_i1	296	0.20945945945945946	Gypsy-22_LMi-I	LTR/Gypsy	4004	[795-857]	0.015484515484515484
comp16282_g1_i1	266	0.08270676691729323	(CGG)n	Simple_repeat	23	[1-23]	0.9565217391304348
comp16283_g1_i1	306	0.11764705882352941	(GATCGCG)n	Simple_repeat	38	[1-38]	0.9736842105263158
comp16296_g1_i1	410	0.13414634146341464	(TTA)n	Simple_repeat	55	[1-55]	0.9818181818181818
comp1629_g1_i1	439	0.26651480637813213	DNA-1_CQ/ClassII/?/?	Unspecified	3260	[1260-1380]	0.03680981595092025
comp1629_g1_i2	309	0.3656957928802589	NeSL-1_CBri	LINE/R2	3562	[382-488]	0.029758562605277934
comp16300_g1_i1	258	0.14728682170542637	(GCA)n	Simple_repeat	39	[1-39]	0.9743589743589743
comp16317_g1_i1	673	0.0950965824665676	(CCCCAAG)n	Simple_repeat	65	[1-65]	0.9846153846153847
comp16330_g1_i1	597	0.10720268006700168	P_DG/ClassII/TIR/P	Unspecified	2888	[471-530]	0.020429362880886426
comp16331_g1_i1	581	0.17555938037865748	MARINER1_MD/ClassII/TIR/Tc1-Mariner	Unspecified	2997	[5-107]	0.03403403403403404
comp16336_g1_i1	575	0.9982608695652174	Gypsy-12_PBa-I	LTR/Gypsy	7718	[3198-3750]	0.07152111946100026
comp16341_g1_i1	264	0.07196969696969698	(CTT)n	Simple_repeat	20	[1-20]	0.95
comp16351_g1_i1	654	0.12844036697247707	DNA-2-20_DR/ClassII/?/?	Unspecified	8652	[6873-6939]	0.0076282940360610264
comp16352_g1_i1	288	0.3263888888888889	Ginger1-1_AC/ClassII/?/Ginger1	Unspecified	4336	[3841-3939]	0.022601476014760147
comp16356_g1_i1	267	0.2883895131086142	Kolobok-N1_AEc/ClassII/?/Kolobok	Unspecified	8251	[4688-4756]	0.008241425281784027
comp16367_g1_i1	280	0.37142857142857144	Kolobok-N1_DF/ClassII/?/Kolobok	Unspecified	726	[172-285]	0.15564738292011018
comp16374_g1_i1	286	0.5104895104895105	G4_DM	LINE/Jockey	3856	[3410-3557]	0.03812240663900415
comp16377_g1_i1	319	0.13479623824451412	(TCC)n	Simple_repeat	47	[1-47]	0.9787234042553191
comp16379_g1_i1	433	0.12933025404157045	(TAGT)n	Simple_repeat	58	[1-58]	0.9827586206896551
comp1637_g1_i1	538	0.379182156133829	Mariner-13_AEc/ClassII/TIR/Tc1-Mariner	Unspecified	1300	[46-252]	0.15846153846153846
comp1637_g2_i1	450	0.5088888888888888	Mariner-13_AEc/ClassII/TIR/Tc1-Mariner	Unspecified	1300	[1-242]	0.1853846153846154
comp16384_g1_i1	266	0.11654135338345864	(TTATTC)n	Simple_repeat	32	[1-32]	0.96875
comp16390_g1_i1	654	0.07186544342507645	(ACC)n	Simple_repeat	48	[1-48]	0.9791666666666666
comp16397_g1_i1	251	0.09163346613545817	(TAA)n	Simple_repeat	24	[1-24]	0.9583333333333334
comp163_g1_i1	377	0.20159151193633953	(TTATAA)n	Simple_repeat	77	[1-77]	0.987012987012987
comp163_g1_i2	241	0.3153526970954357	(TTATAA)n	Simple_repeat	77	[1-77]	0.987012987012987
comp16410_g1_i1	514	0.042801556420233464	(G)n	Simple_repeat	23	[1-23]	0.9565217391304348
comp16414_g1_i1	492	0.054878048780487805	(AAT)n	Simple_repeat	29	[1-29]	0.9655172413793104
comp16428_g1_i1	262	0.1450381679389313	(ATTACTA)n	Simple_repeat	38	[1-38]	0.9736842105263158
comp16434_g1_i1	246	0.08536585365853659	(G)n	Simple_repeat	22	[1-22]	0.9545454545454546
comp16440_g1_i1	285	0.3333333333333333	Polinton-9_NVi/ClassII/Maverick/Maverick	Unspecified	17121	[6706-6801]	0.005548741311839262
comp16442_g1_i1	308	0.1461038961038961	(AGTATTT)n	Simple_repeat	47	[1-47]	0.9787234042553191
comp16448_g1_i1	628	0.10031847133757962	(TCTTC)n	Simple_repeat	63	[1-63]	0.9841269841269841
comp16450_g1_i1	233	0.17167381974248927	(GTC)n	Simple_repeat	41	[1-41]	0.975609756097561
comp16470_g1_i1	629	0.07313195548489666	HELITRON7_CB/ClassII/Helitron/Helitron	Unspecified	1381	[211-254]	0.031136857349746562
comp16481_g1_i1	437	0.13043478260869565	L1-47_DR	LINE/L1	5457	[185-243]	0.010628550485614806
comp16488_g1_i1	429	0.12354312354312354	CR1_Ele9	LINE/Jockey	4924	[1808-1861]	0.010763606823720552
comp1648_g1_i1	509	0.1650294695481336	DNA-2_AEc/ClassII/?/?	Unspecified	953	[829-913]	0.08814270724029381
comp16492_g1_i1	250	0.152	Polinton-2_DK/ClassII/Maverick/Maverick	Unspecified	6981	[1197-1235]	0.00544334622546913
comp16509_g1_i1	1263	0.03167062549485352	(AT)n	Simple_repeat	43	[1-43]	0.9767441860465116
comp16510_g1_i1	450	0.28	Dada-U6_SS/ClassII/?/?	Unspecified	8042	[3909-3986]	0.009574732653568764
comp16520_g1_i1	292	0.1232876712328767	(AT)n	Simple_repeat	39	[1-39]	0.9743589743589743
comp16521_g1_i1	217	0.0967741935483871	(TA)n	Simple_repeat	22	[1-22]	0.9545454545454546
comp16536_g1_i1	275	0.18181818181818182	(CAAGACTTC)n	Simple_repeat	51	[1-51]	0.9803921568627451
comp16548_g1_i1	353	0.11331444759206799	(TA)n	Simple_repeat	43	[1-43]	0.9767441860465116
comp16551_g1_i1	388	0.07989690721649484	(GC)n	Simple_repeat	34	[1-34]	0.9705882352941176
comp1655_g1_i1	313	0.10543130990415335	piggyBac-N1_DWil/ClassII/TIR/PiggyBac	Unspecified	658	[1-34]	0.05015197568389058
comp16572_g1_i1	283	0.15547703180212014	Gypsy-51_LMi-I	LTR/Gypsy	4090	[2054-2098]	0.010757946210268949
comp16580_g1_i1	486	0.9382716049382716	BEL-2_LH-I	LTR/Bel-Pao	5493	[4796-5358]	0.10231203349717823
comp16584_g1_i1	491	0.1384928716904277	GA-rich	Low_complexity	71	[1-71]	0.9859154929577465
comp16588_g1_i1	344	0.05232558139534884	(AG)n	Simple_repeat	19	[1-19]	0.9473684210526315
comp1658_g1_i1	217	0.271889400921659	(ATT)n	Simple_repeat	61	[1-61]	0.9836065573770492
comp1658_g2_i1	549	0.08743169398907104	DNA-like-1_Hmel/ClassII/?/?	Unspecified	248	[1-52]	0.2056451612903226
comp16596_g1_i1	319	0.11912225705329153	(TTGA)n	Simple_repeat	39	[1-39]	0.9743589743589743
comp16601_g1_i1	579	0.16062176165803108	Kolobok-1_PBa/ClassII/?/Kolobok	Unspecified	1561	[565-658]	0.05957719410634209
comp16606_g1_i1	388	0.12886597938144329	(ATATTAA)n	Simple_repeat	52	[1-52]	0.9807692307692307
comp16608_g1_i1	266	0.9586466165413534	DNA-1_CQ/ClassII/?/?	Unspecified	3260	[1304-1575]	0.08312883435582823
comp16615_g1_i1	302	0.19536423841059603	EnSpm-4_HM/ClassII/TIR/CACTA	Unspecified	8857	[1298-1355]	0.006435587670768884
comp16617_g1_i1	508	0.06496062992125984	Copia-22_SI-I	LTR/Copia	4195	[3306-3340]	0.008104886769964244
comp16618_g1_i1	310	0.07741935483870968	(ACG)n	Simple_repeat	25	[1-25]	0.96
comp16630_g1_i1	729	0.102880658436214	Neptune3_Ren	PLE/Penelope	3664	[3550-3634]	0.02292576419213974
comp16632_g1_i1	396	0.0707070707070707	(CGCT)n	Simple_repeat	31	[1-31]	0.967741935483871
comp16633_g1_i1	317	0.056782334384858045	(AG)n	Simple_repeat	19	[1-19]	0.9473684210526315
comp16641_g1_i1	347	0.1585014409221902	(ATTACTA)n	Simple_repeat	59	[1-59]	0.9830508474576272
comp16648_g1_i1	263	0.07604562737642585	(GCTC)n	Simple_repeat	21	[1-21]	0.9523809523809523
comp16650_g1_i1	329	0.11550151975683891	piggyBac-N1_HSal/ClassII/TIR/PiggyBac	Unspecified	745	[707-745]	0.05100671140939597
comp16666_g1_i1	493	0.8843813387423936	Jockey-7_DEu	LINE/Jockey	4138	[1607-1880]	0.06597390043499275
comp16675_g1_i1	565	0.04247787610619469	(GA)n	Simple_repeat	28	[1-28]	0.9642857142857143
comp1669_g1_i1	307	0.9218241042345277	R1B_NVi	LINE/I	6140	[5204-5350]	0.023778501628664496
comp16712_g1_i1	360	0.13333333333333333	(ATATAA)n	Simple_repeat	51	[1-51]	0.9803921568627451
comp16713_g1_i1	532	0.13909774436090225	(CGTTGAT)n	Simple_repeat	72	[1-72]	0.9861111111111112
comp16730_g1_i1	373	0.128686327077748	(CGA)n	Simple_repeat	47	[1-47]	0.9787234042553191
comp16742_g1_i1	759	0.05533596837944664	CryptonS-12_PI/ClassII/Crypton/Crypton	Unspecified	3105	[242-284]	0.01352657004830918
comp16743_g1_i1	286	0.1853146853146853	(TAA)n	Simple_repeat	56	[1-56]	0.9821428571428571
comp16759_g1_i1	294	0.10204081632653061	A-rich	Low_complexity	29	[1-29]	0.9655172413793104
comp16764_g1_i1	259	0.10810810810810811	(TTTA)n	Simple_repeat	28	[1-28]	0.9642857142857143
comp16770_g1_i1	495	0.2	(AAT)n	Simple_repeat	97	[1-97]	0.9896907216494846
comp16778_g1_i1	529	0.05860113421550094	(CCA)n	Simple_repeat	32	[1-32]	0.96875
comp16794_g1_i1	358	0.013966480446927373	(CGGCG)n	Simple_repeat	42	[3-42]	0.9285714285714286
comp16797_g1_i1	362	0.11878453038674033	(TATA)n	Simple_repeat	47	[1-47]	0.9787234042553191
comp16811_g1_i1	496	0.06653225806451613	(GTATGA)n	Simple_repeat	38	[1-38]	0.9736842105263158
comp16815_g1_i1	557	0.0933572710951526	(ATT)n	Simple_repeat	51	[1-51]	0.9803921568627451
comp16826_g1_i1	467	0.0835117773019272	L1-19_FV	LINE/L1	1339	[1109-1149]	0.029873039581777446
comp1682_g1_i1	304	0.16447368421052633	Rehavkus-1_NVi/ClassII/TIR/MuDR	Unspecified	8458	[4118-4168]	0.005911563017261764
comp16840_g1_i1	832	0.13822115384615385	Mariner-22_SIn/ClassII/TIR/Tc1-Mariner	Unspecified	1553	[1-116]	0.07405022537025113
comp16849_g1_i1	316	0.060126582278481014	(GGC)n	Simple_repeat	20	[1-20]	0.95
comp16859_g1_i1	269	0.13382899628252787	(TAATGA)n	Simple_repeat	34	[1-34]	0.9705882352941176
comp16863_g1_i1	996	0.5813253012048193	Mariner-4_DAn/ClassII/TIR/Tc1-Mariner	Unspecified	1640	[796-1343]	0.3335365853658537
comp16869_g1_i1	344	0.18023255813953487	Gypsy-46_MLP-I	LTR/Gypsy	5797	[2429-2493]	0.011040193203381059
comp16876_g1_i1	449	0.0935412026726058	A-rich	Low_complexity	43	[1-43]	0.9767441860465116
comp16882_g1_i1	281	0.1708185053380783	(TTAT)n	Simple_repeat	50	[1-50]	0.98
comp16891_g1_i1	224	0.35714285714285715	(TATATAA)n	Simple_repeat	78	[1-78]	0.9871794871794872
comp168_g1_i1	295	0.09830508474576272	(TA)n	Simple_repeat	31	[1-31]	0.967741935483871
comp1690_g1_i2	309	0.35275080906148865	SMAR18/ClassII/TIR/Tc1-Mariner	Unspecified	2677	[2567-2677]	0.04109077325364214
comp16914_g1_i1	654	0.047400611620795105	(CGGCA)n	Simple_repeat	32	[1-32]	0.96875
comp16922_g1_i1	594	0.0707070707070707	LINE1-29_SBi	LINE/L1	4384	[3607-3653]	0.010492700729927007
comp16924_g1_i1	240	0.29583333333333334	MARIAM1/ClassII/TIR/Tc1-Mariner	Unspecified	1284	[1112-1183]	0.05529595015576324
comp16938_g1_i1	442	0.10407239819004525	A-rich	Low_complexity	45	[1-45]	0.9777777777777777
comp1693_g2_i1	692	0.06791907514450866	(TCCGT)n	Simple_repeat	47	[1-47]	0.9787234042553191
comp16940_g1_i1	237	0.20675105485232068	Kolobok-N1_AEc/ClassII/?/Kolobok	Unspecified	8251	[4713-4762]	0.005938674100109078
comp16942_g1_i1	1024	0.0458984375	(TCTTCCT)n	Simple_repeat	46	[1-46]	0.9782608695652174
comp16947_g1_i1	581	0.09294320137693632	(TAAGG)n	Simple_repeat	55	[1-55]	0.9818181818181818
comp16951_g1_i1	255	0.08627450980392157	(GA)n	Simple_repeat	23	[1-23]	0.9565217391304348
comp16957_g1_i1	346	0.2514450867052023	Helitron-N3_PBa/ClassII/Helitron/Helitron	Unspecified	3967	[985-1070]	0.021426770859591632
comp16959_g1_i1	268	0.1828358208955224	(TCTC)n	Simple_repeat	50	[1-50]	0.98
comp16964_g1_i1	544	0.11580882352941177	Kolobok-N4_DR/ClassII/?/Kolobok	Unspecified	3002	[971-1037]	0.021985343104596936
comp16966_g1_i1	312	0.05128205128205128	(GCC)n	Simple_repeat	17	[1-17]	0.9411764705882353
comp16969_g1_i1	282	0.16312056737588654	Mariner-N6_SIn/ClassII/TIR/Tc1-Mariner	Unspecified	2373	[694-741]	0.01980615254951538
comp16973_g1_i1	357	0.11484593837535013	(TATATA)n	Simple_repeat	42	[1-42]	0.9761904761904762
comp16982_g1_i1	512	0.0625	(AATTT)n	Simple_repeat	33	[1-33]	0.9696969696969697
comp16992_g1_i1	753	0.13545816733067728	Mariner-26_SIn/ClassII/TIR/Tc1-Mariner	Unspecified	1266	[1-102]	0.07977883096366509
comp1701_g2_i1	491	0.07942973523421588	(TTATTC)n	Simple_repeat	39	[1-39]	0.9743589743589743
comp17022_g1_i1	639	0.35524256651017216	EnSpm1_SB/ClassII/TIR/CACTA	Unspecified	14710	[9735-9941]	0.014004078857919782
comp17024_g1_i1	913	0.2672508214676889	Sake2_BM	LINE/Jockey	3192	[1056-1299]	0.07612781954887218
comp17034_g1_i1	386	0.08808290155440414	(ATTCCG)n	Simple_repeat	35	[1-35]	0.9714285714285714
comp17037_g1_i1	592	0.060810810810810814	Gypsy-17_TC-I	LTR/Gypsy	4563	[2195-2230]	0.007670392285776901
comp17041_g1_i1	289	0.25951557093425603	Gypsy-36_Adi-I	LTR/Gypsy	3110	[2275-2358]	0.026688102893890675
comp17047_g1_i1	351	0.1452991452991453	(AATAAT)n	Simple_repeat	52	[1-52]	0.9807692307692307
comp17051_g1_i1	701	0.05706134094151213	A-rich	Low_complexity	41	[1-41]	0.975609756097561
comp17052_g1_i1	445	0.1662921348314607	(TTA)n	Simple_repeat	71	[1-71]	0.9859154929577465
comp17057_g1_i1	332	0.11144578313253012	npiggyBac-1_EF/ClassII/TIR/PiggyBac	Unspecified	90	[1-38]	0.4111111111111111
comp17066_g1_i1	214	0.09813084112149532	(GAA)n	Simple_repeat	22	[1-22]	0.9545454545454546
comp17079_g1_i1	693	0.08225108225108226	(TTATATT)n	Simple_repeat	59	[1-59]	0.9830508474576272
comp1707_g1_i1	570	0.9982456140350877	Mariner-98_HSal/ClassII/TIR/Tc1-Mariner	Unspecified	1292	[142-710]	0.43962848297213625
comp17094_g1_i1	318	0.14150943396226415	(AT)n	Simple_repeat	47	[1-47]	0.9787234042553191
comp17095_g1_i1	269	0.1895910780669145	(AATATTC)n	Simple_repeat	49	[1-49]	0.9795918367346939
comp17099_g1_i1	404	0.05693069306930693	(CGA)n	Simple_repeat	24	[1-24]	0.9583333333333334
comp17100_g1_i1	332	0.20180722891566266	Copia-14_JC-I	LTR/Copia	4645	[3995-4065]	0.015069967707212056
comp17106_g1_i1	264	0.10606060606060606	(GAATC)n	Simple_repeat	29	[1-29]	0.9655172413793104
comp17114_g1_i1	497	0.03621730382293763	(GA)n	Simple_repeat	19	[1-19]	0.9473684210526315
comp17118_g1_i1	306	0.2581699346405229	(ATAT)n	Simple_repeat	83	[1-83]	0.9879518072289156
comp17125_g1_i1	277	0.10830324909747292	(GCG)n	Simple_repeat	32	[1-32]	0.96875
comp1712_g2_i1	405	0.45925925925925926	Mariner-4_LMi/ClassII/TIR/Tc1-Mariner	Unspecified	1626	[366-552]	0.11439114391143912
comp17138_g1_i1	314	0.21337579617834396	Mariner-N15_HSal/ClassII/TIR/Tc1-Mariner	Unspecified	2024	[1957-2024]	0.033102766798418976
comp17141_g1_i1	285	0.17894736842105263	(ATTT)n	Simple_repeat	48	[1-48]	0.9791666666666666
comp17148_g1_i1	275	0.16	Gypsy-68_PAb-LTR	LTR/Gypsy	1318	[604-651]	0.03566009104704097
comp1714_g1_i1	478	0.08577405857740586	(ATTTT)n	Simple_repeat	41	[1-41]	0.975609756097561
comp1714_g2_i1	560	0.044642857142857144	(TTTAT)n	Simple_repeat	26	[1-26]	0.9615384615384616
comp17155_g1_i1	432	0.3912037037037037	Mariner-22_DF/ClassII/TIR/Tc1-Mariner	Unspecified	1650	[675-845]	0.10303030303030303
comp17159_g1_i1	580	0.1396551724137931	(AATT)n	Simple_repeat	78	[1-78]	0.9871794871794872
comp17161_g1_i1	333	0.5795795795795796	Mariner-11_AEc/ClassII/TIR/Tc1-Mariner	Unspecified	2034	[1-193]	0.0943952802359882
comp17165_g1_i1	286	0.15734265734265734	GA-rich	Low_complexity	50	[1-50]	0.98
comp17178_g1_i1	345	0.17391304347826086	GA-rich	Low_complexity	61	[1-61]	0.9836065573770492
comp17182_g1_i1	379	0.11609498680738786	(CGC)n	Simple_repeat	45	[1-45]	0.9777777777777777
comp17188_g1_i1	232	0.19827586206896552	A-rich	Low_complexity	45	[1-45]	0.9777777777777777
comp17194_g1_i1	297	0.1717171717171717	EnSpm-7_FV/ClassII/TIR/CACTA	Unspecified	8314	[733-780]	0.005653115227327399
comp17195_g1_i1	802	0.08603491271820449	Gypsy-22_DWil-I	LTR/Gypsy	6217	[1135-1207]	0.011581148463889336
comp1719_g1_i1	301	0.12292358803986711	(ACGAGAT)n	Simple_repeat	39	[1-39]	0.9743589743589743
comp17208_g1_i1	404	0.8366336633663366	Mariner-1_PBa/ClassII/TIR/Tc1-Mariner	Unspecified	1297	[433-834]	0.3091750192752506
comp17212_g1_i1	293	0.19112627986348124	(TTTTC)n	Simple_repeat	55	[1-55]	0.9818181818181818
comp17222_g1_i1	255	0.30196078431372547	GA-rich	Low_complexity	79	[1-79]	0.9873417721518988
comp17223_g1_i1	294	0.1870748299319728	(ATTTAA)n	Simple_repeat	52	[1-52]	0.9807692307692307
comp17233_g1_i1	366	0.07377049180327869	GA-rich	Low_complexity	28	[1-28]	0.9642857142857143
comp17243_g1_i1	657	0.0517503805175038	(TATTA)n	Simple_repeat	36	[1-36]	0.9722222222222222
comp17250_g1_i1	349	0.2177650429799427	Gypsy-13_SMo-LTR	LTR/Gypsy	1744	[569-641]	0.04128440366972477
comp17253_g1_i1	393	0.2035623409669211	(TACTTT)n	Simple_repeat	84	[1-84]	0.9880952380952381
comp17257_g1_i1	502	0.08964143426294821	(CGAAGAA)n	Simple_repeat	44	[1-44]	0.9772727272727273
comp17258_g1_i1	306	0.21895424836601307	A-rich	Low_complexity	67	[1-67]	0.9850746268656716
comp17262_g1_i1	314	0.09872611464968153	GA-rich	Low_complexity	32	[1-32]	0.96875
comp17266_g1_i1	467	0.10920770877944326	(TTTTCG)n	Simple_repeat	47	[1-47]	0.9787234042553191
comp1727_g1_i1	344	0.7209302325581395	DNA-1_CQ/ClassII/?/?	Unspecified	3260	[1446-1714]	0.08220858895705521
comp17292_g1_i1	733	0.10368349249658936	(CTCT)n	Simple_repeat	79	[1-79]	0.9873417721518988
comp17294_g1_i1	294	0.1870748299319728	(GCGGACTC)n	Simple_repeat	57	[1-57]	0.9824561403508771
comp1729_g1_i1	211	0.1990521327014218	A-rich	Low_complexity	41	[1-41]	0.975609756097561
comp17305_g1_i1	206	0.21359223300970873	(CAATT)n	Simple_repeat	43	[1-43]	0.9767441860465116
comp17326_g1_i1	433	0.18244803695150116	(AATAA)n	Simple_repeat	76	[1-76]	0.9868421052631579
comp17335_g1_i1	259	0.444015444015444	TART_DV	LINE/Jockey	15099	[2736-2858]	0.00808000529836413
comp17341_g1_i1	489	0.10020449897750511	GA-rich	Low_complexity	50	[1-50]	0.98
comp17358_g1_i1	337	0.08605341246290801	(CGT)n	Simple_repeat	30	[1-30]	0.9666666666666667
comp17362_g1_i1	463	0.12742980561555076	A-rich	Low_complexity	57	[1-57]	0.9824561403508771
comp17365_g1_i1	238	0.23109243697478993	hATm-29_HM/ClassII/TIR/hAT	Unspecified	3389	[2257-2309]	0.015343759221009147
comp17370_g1_i1	502	0.07171314741035857	(GCGCTC)n	Simple_repeat	38	[1-38]	0.9736842105263158
comp17371_g1_i1	359	0.06128133704735376	(GA)n	Simple_repeat	23	[1-23]	0.9565217391304348
comp17376_g1_i1	338	0.11834319526627218	(TCG)n	Simple_repeat	41	[1-41]	0.975609756097561
comp1737_g1_i1	586	0.06825938566552901	(ATAGAGG)n	Simple_repeat	41	[1-41]	0.975609756097561
comp17382_g1_i1	377	0.10344827586206896	A-rich	Low_complexity	38	[1-38]	0.9736842105263158
comp17387_g1_i1	371	0.19946091644204852	MER30_	3/ClassII/TIR/hAT	230	[1-75]	0.3217391304347826
comp1738_g1_i1	513	0.6569200779727096	BEL-87_CQ-I	LTR/Bel-Pao	5414	[4907-5320]	0.07628370890284447
comp17396_g1_i1	315	0.1523809523809524	(AAG)n	Simple_repeat	48	[1-48]	0.9791666666666666
comp17405_g1_i1	582	0.13058419243986255	BEL35-I_DR	LTR/Bel-Pao	7317	[1518-1600]	0.011206778734454012
comp1740_g1_i1	329	0.11246200607902736	(ATTTTTA)n	Simple_repeat	36	[1-36]	0.9722222222222222
comp17417_g1_i1	676	0.0621301775147929	GA-rich	Low_complexity	44	[1-44]	0.9772727272727273
comp17418_g1_i1	273	0.10989010989010989	(GAAAA)n	Simple_repeat	29	[1-29]	0.9655172413793104
comp17433_g1_i1	732	0.04918032786885246	(GTCG)n	Simple_repeat	37	[1-37]	0.972972972972973
comp17443_g1_i1	300	0.2	(AT)n	Simple_repeat	66	[1-66]	0.9848484848484849
comp17446_g1_i1	446	0.2556053811659193	Mariner-62_HSal/ClassII/TIR/Tc1-Mariner	Unspecified	2666	[361-438]	0.028882220555138786
comp17447_g1_i1	914	0.028446389496717725	(TTGTT)n	Simple_repeat	27	[1-27]	0.9629629629629629
comp17450_g1_i1	289	0.08996539792387544	(ATTC)n	Simple_repeat	27	[1-27]	0.9629629629629629
comp17461_g1_i1	229	0.2052401746724891	(ATATTA)n	Simple_repeat	48	[1-48]	0.9791666666666666
comp17463_g1_i1	267	0.18352059925093633	DNA-like-1_Hmel/ClassII/?/?	Unspecified	248	[1-48]	0.18951612903225806
comp17464_g1_i1	244	0.09016393442622951	(AGA)n	Simple_repeat	23	[1-23]	0.9565217391304348
comp17472_g1_i1	261	0.20306513409961685	(ATC)n	Simple_repeat	49	[1-49]	0.9795918367346939
comp17476_g1_i1	281	0.1103202846975089	(TATTTT)n	Simple_repeat	32	[1-32]	0.96875
comp17486_g1_i1	455	0.3054945054945055	(TATTCTATTT)n	Simple_repeat	140	[1-140]	0.9928571428571429
comp17487_g1_i1	490	0.1306122448979592	Mariner-N5_AEc/ClassII/TIR/Tc1-Mariner	Unspecified	848	[12-75]	0.07429245283018868
comp17489_g1_i1	422	0.08767772511848342	(TGAAGA)n	Simple_repeat	38	[1-38]	0.9736842105263158
comp17495_g1_i1	701	0.052781740370898715	(TATAGAA)n	Simple_repeat	38	[1-38]	0.9736842105263158
comp1749_g1_i1	239	0.18410041841004185	A-rich	Low_complexity	45	[1-45]	0.9777777777777777
comp17500_g1_i1	650	0.05076923076923077	(TCGGCG)n	Simple_repeat	34	[1-34]	0.9705882352941176
comp17527_g1_i1	320	0.13125	(TCGGA)n	Simple_repeat	43	[1-43]	0.9767441860465116
comp17550_g1_i1	423	0.2127659574468085	Helitron-1_CRe/ClassII/Helitron/Helitron	Unspecified	15734	[12991-13082]	0.005783653235032414
comp17559_g1_i1	301	0.49169435215946844	GA-rich	Low_complexity	153	[1-153]	0.9934640522875817
comp17562_g1_i1	267	0.08614232209737828	(A)n	Simple_repeat	24	[1-24]	0.9583333333333334
comp17563_g1_i1	302	0.1423841059602649	(ATT)n	Simple_repeat	42	[1-42]	0.9761904761904762
comp17566_g1_i1	521	0.14971209213051823	Mariner-13_AEc/ClassII/TIR/Tc1-Mariner	Unspecified	1300	[1-82]	0.06230769230769231
comp17567_g1_i1	274	0.17518248175182483	A-rich	Low_complexity	51	[1-51]	0.9803921568627451
comp17576_g1_i1	280	0.16071428571428573	(GCCT)n	Simple_repeat	46	[1-46]	0.9782608695652174
comp17579_g1_i1	322	0.15838509316770186	A-rich	Low_complexity	49	[1-49]	0.9795918367346939
comp17583_g1_i1	406	0.12807881773399016	A-rich	Low_complexity	52	[1-52]	0.9807692307692307
comp17584_g1_i1	590	0.10338983050847457	(CG)n	Simple_repeat	62	[1-62]	0.9838709677419355
comp17587_g1_i1	530	0.1	A-rich	Low_complexity	55	[1-55]	0.9818181818181818
comp17589_g1_i1	425	0.05411764705882353	(GAA)n	Simple_repeat	24	[1-24]	0.9583333333333334
comp17599_g1_i1	228	0.21929824561403508	A-rich	Low_complexity	50	[1-50]	0.98
comp17601_g1_i1	950	0.04736842105263158	(TAATTAT)n	Simple_repeat	45	[1-45]	0.9777777777777777
comp17602_g1_i1	582	0.15292096219931273	(TAAT)n	Simple_repeat	93	[1-93]	0.989247311827957
comp17607_g1_i1	307	0.1465798045602606	(ATTC)n	Simple_repeat	47	[1-47]	0.9787234042553191
comp17610_g1_i1	250	0.116	(CGACG)n	Simple_repeat	30	[1-30]	0.9666666666666667
comp17613_g1_i1	372	0.053763440860215055	(AG)n	Simple_repeat	21	[1-21]	0.9523809523809523
comp17630_g1_i1	265	0.11320754716981132	(CGCCG)n	Simple_repeat	31	[1-31]	0.967741935483871
comp17631_g1_i1	399	0.15037593984962405	Helitron-N17B_CGi/ClassII/Helitron/Helitron	Unspecified	5822	[38-100]	0.010649261422191686
comp17634_g1_i1	581	0.05679862306368331	(AAAT)n	Simple_repeat	34	[1-34]	0.9705882352941176
comp17647_g1_i1	462	0.14285714285714285	(GAGCCC)n	Simple_repeat	67	[1-67]	0.9850746268656716
comp17653_g1_i1	417	0.14148681055155876	BEL-2_DPu-I	LTR/Bel-Pao	5494	[4056-4114]	0.010556971241354204
comp1765_g1_i1	453	0.10816777041942605	DNA-7-20_NV/ClassII/?/?	Unspecified	915	[31-79]	0.05245901639344262
comp17668_g1_i1	251	0.23904382470119523	(ATAATT)n	Simple_repeat	58	[1-58]	0.9827586206896551
comp17676_g1_i1	643	0.06842923794712286	(TATAAT)n	Simple_repeat	45	[1-45]	0.9777777777777777
comp17680_g1_i1	552	0.08333333333333333	A-rich	Low_complexity	45	[1-45]	0.9777777777777777
comp17681_g1_i1	351	0.2849002849002849	A-rich	Low_complexity	101	[1-101]	0.9900990099009901
comp17682_g1_i1	569	0.0984182776801406	RLG_scTat_3_1-I	LTR/Gypsy	7951	[1490-1545]	0.0069173688844170545
comp17688_g1_i1	314	0.19745222929936307	(TAATCA)n	Simple_repeat	63	[1-63]	0.9841269841269841
comp17704_g1_i1	211	0.10426540284360189	(ACGA)n	Simple_repeat	23	[1-23]	0.9565217391304348
comp1770_g1_i2	677	0.07533234859675036	piggyBac-10_SM/ClassII/TIR/PiggyBac	Unspecified	2648	[2588-2639]	0.019259818731117824
comp17728_g1_i1	403	0.2109181141439206	(TAATG)n	Simple_repeat	87	[1-87]	0.9885057471264368
comp17729_g1_i1	455	0.1010989010989011	(ATTTT)n	Simple_repeat	48	[1-48]	0.9791666666666666
comp1772_g1_i1	300	0.17666666666666667	(GCGA)n	Simple_repeat	53	[1-53]	0.9811320754716981
comp17736_g1_i1	407	0.0687960687960688	(TTCGT)n	Simple_repeat	29	[1-29]	0.9655172413793104
comp17745_g1_i1	264	0.10606060606060606	(TAAA)n	Simple_repeat	30	[1-30]	0.9666666666666667
comp17751_g1_i1	552	0.14492753623188406	A-rich	Low_complexity	82	[1-82]	0.9878048780487805
comp17755_g1_i1	534	0.16104868913857678	(TTTTTAT)n	Simple_repeat	86	[1-86]	0.9883720930232558
comp17757_g1_i1	257	0.22957198443579765	(AT)n	Simple_repeat	58	[1-58]	0.9827586206896551
comp1775_g1_i1	582	0.8969072164948454	Gypsy9-NVi_I-int	LTR/Gypsy	4135	[3006-3574]	0.1373639661426844
comp17763_g1_i1	585	0.06153846153846154	(GAAA)n	Simple_repeat	37	[1-37]	0.972972972972973
comp17776_g1_i1	499	0.056112224448897796	(ATT)n	Simple_repeat	29	[1-29]	0.9655172413793104
comp17797_g1_i1	282	0.20567375886524822	(CGAGT)n	Simple_repeat	59	[1-59]	0.9830508474576272
comp17798_g1_i1	672	0.06696428571428571	(TTATCG)n	Simple_repeat	46	[1-46]	0.9782608695652174
comp17799_g1_i1	217	0.880184331797235	piggyBac-10_SM/ClassII/TIR/PiggyBac	Unspecified	2648	[1186-1377]	0.07212990936555891
comp17801_g1_i1	295	0.07796610169491526	(TGT)n	Simple_repeat	24	[1-24]	0.9583333333333334
comp17802_g1_i1	285	0.15087719298245614	(CTT)n	Simple_repeat	43	[1-43]	0.9767441860465116
comp17811_g1_i1	241	0.15767634854771784	(AGTTTAA)n	Simple_repeat	40	[1-40]	0.975
comp1781_g1_i2	627	0.09728867623604466	BEL27-I_DR	LTR/Bel-Pao	6122	[1111-1163]	0.008493956223456387
comp17836_g1_i1	408	0.06372549019607843	(CGCGG)n	Simple_repeat	27	[1-27]	0.9629629629629629
comp17845_g1_i1	823	0.10935601458080195	Sola3-1_BF/ClassII/?/Sola	Unspecified	8912	[2734-2833]	0.011108617594254936
comp17847_g1_i1	298	0.1912751677852349	Charlie12_	2/ClassII/TIR/hAT	2873	[1-58]	0.01983988861816916
comp1784_g1_i1	226	0.20353982300884957	(TATAATT)n	Simple_repeat	48	[1-48]	0.9791666666666666
comp17850_g1_i1	313	0.14696485623003194	(ATATATA)n	Simple_repeat	50	[1-50]	0.98
comp17853_g1_i1	286	0.17832167832167833	(AACATTT)n	Simple_repeat	49	[1-49]	0.9795918367346939
comp17860_g1_i1	288	0.125	(TTTAAT)n	Simple_repeat	36	[1-36]	0.9722222222222222
comp17865_g1_i1	246	0.09349593495934959	(AG)n	Simple_repeat	24	[1-24]	0.9583333333333334
comp1786_g1_i1	334	0.16167664670658682	Gypsy-16_GA-I	LTR/Gypsy	5928	[3-61]	0.009784075573549258
comp1786_g1_i2	221	0.24434389140271492	Gypsy-16_GA-I	LTR/Gypsy	5928	[3-61]	0.009784075573549258
comp17883_g1_i1	250	0.348	(ATTAAT)n	Simple_repeat	87	[1-87]	0.9885057471264368
comp17893_g1_i1	439	0.07289293849658314	(AC)n	Simple_repeat	33	[1-33]	0.9696969696969697
comp17920_g1_i1	335	0.5671641791044776	Kolobok-21_HMa/ClassII/?/Kolobok	Unspecified	2775	[1747-1937]	0.06846846846846846
comp17927_g1_i1	218	0.15137614678899083	(GAA)n	Simple_repeat	35	[1-35]	0.9714285714285714
comp17928_g1_i1	300	0.16333333333333333	Kolobok-N1_AEc/ClassII/?/Kolobok	Unspecified	8251	[4708-4757]	0.005938674100109078
comp1792_g2_i1	307	0.2931596091205212	Copia-45_RC-I	LTR/Copia	5092	[343-428]	0.01669285153181461
comp17930_g1_i1	680	0.1338235294117647	(CTCCT)n	Simple_repeat	92	[1-92]	0.9891304347826086
comp17937_g1_i1	335	0.3253731343283582	Mariner-32_HSal/ClassII/TIR/Tc1-Mariner	Unspecified	1277	[1096-1205]	0.08535630383711824
comp1794_g1_i1	463	0.816414686825054	R1-1_AEc	LINE/I	3994	[1215-1681]	0.11667501251877817
comp1794_g1_i2	947	0.8880675818373812	HOPEBm2	LINE/I	4047	[1215-2474]	0.3110946380034594
comp17955_g2_i1	240	0.07916666666666666	(CT)n	Simple_repeat	20	[1-20]	0.95
comp17959_g1_i1	438	0.0867579908675799	(TAACAGA)n	Simple_repeat	44	[1-44]	0.9772727272727273
comp17960_g1_i1	314	0.12420382165605096	(TA)n	Simple_repeat	41	[1-41]	0.975609756097561
comp17966_g1_i1	413	0.10653753026634383	(TATA)n	Simple_repeat	46	[1-46]	0.9782608695652174
comp17970_g1_i1	374	0.11229946524064172	(CT)n	Simple_repeat	44	[1-44]	0.9772727272727273
comp17971_g1_i1	454	0.0947136563876652	(TGTCACG)n	Simple_repeat	43	[1-43]	0.9767441860465116
comp17973_g1_i1	385	0.2779220779220779	HATN11_DR/ClassII/TIR/hAT	Unspecified	927	[659-761]	0.11003236245954692
comp17976_g1_i1	855	0.044444444444444446	EnSpm-43_SBi/ClassII/TIR/CACTA	Unspecified	13721	[11354-11392]	0.002769477443335034
comp1797_g2_i1	317	0.0914826498422713	(ACGCG)n	Simple_repeat	30	[1-30]	0.9666666666666667
comp1797_g2_i2	335	0.11641791044776119	(ACGCG)n	Simple_repeat	39	[1-39]	0.9743589743589743
comp1797_g3_i1	520	0.05961538461538462	(GCGAC)n	Simple_repeat	33	[1-33]	0.9696969696969697
comp17980_g1_i1	568	0.040492957746478875	(AT)n	Simple_repeat	24	[1-24]	0.9583333333333334
comp17998_g1_i1	253	0.2490118577075099	GA-rich	Low_complexity	61	[1-61]	0.9836065573770492
comp18008_g1_i1	316	0.25	Gypsy-27_SP-I	LTR/Gypsy	4600	[1601-1676]	0.016304347826086956
comp1800_g1_i1	518	0.06177606177606178	(AT)n	Simple_repeat	32	[1-32]	0.96875
comp1800_g1_i2	252	0.12698412698412698	(AT)n	Simple_repeat	32	[1-32]	0.96875
comp18012_g1_i1	468	0.049145299145299144	(AAT)n	Simple_repeat	23	[1-23]	0.9565217391304348
comp18013_g1_i1	853	0.06565064478311841	(TGTTTTG)n	Simple_repeat	57	[1-57]	0.9824561403508771
comp18031_g1_i1	301	0.10299003322259136	(AAAT)n	Simple_repeat	32	[1-32]	0.96875
comp18039_g1_i1	305	0.1540983606557377	(TAATA)n	Simple_repeat	47	[1-47]	0.9787234042553191
comp18051_g1_i1	266	0.06766917293233082	(TCG)n	Simple_repeat	19	[1-19]	0.9473684210526315
comp18069_g1_i1	292	0.13013698630136986	(TCAATT)n	Simple_repeat	37	[1-37]	0.972972972972973
comp18071_g1_i1	437	0.12814645308924486	(GGAGTG)n	Simple_repeat	55	[1-55]	0.9818181818181818
comp18088_g1_i1	592	0.14527027027027026	(TAATA)n	Simple_repeat	91	[1-91]	0.989010989010989
comp18096_g1_i1	263	0.09885931558935361	(GAA)n	Simple_repeat	28	[1-28]	0.9642857142857143
comp18101_g1_i1	743	0.03095558546433378	(CTTTC)n	Simple_repeat	81	[1-40]	0.48148148148148145
comp18113_g1_i1	240	0.525	(CTTTT)n	Simple_repeat	129	[1-129]	0.9922480620155039
comp18117_g1_i1	451	0.06873614190687362	(CCGCG)n	Simple_repeat	33	[1-33]	0.9696969696969697
comp18133_g1_i1	290	0.20689655172413793	SZ-10_I-int	LTR/Gypsy	5660	[3562-3621]	0.010424028268551237
comp18144_g1_i1	279	0.13261648745519714	(AAGTGTA)n	Simple_repeat	39	[1-39]	0.9743589743589743
comp18145_g1_i1	368	0.12228260869565218	(CTCTTTTT)n	Simple_repeat	47	[1-47]	0.9787234042553191
comp18154_g1_i1	304	0.18092105263157895	G-rich	Low_complexity	53	[1-53]	0.9811320754716981
comp18162_g1_i1	263	0.13688212927756654	A-rich	Low_complexity	35	[1-35]	0.9714285714285714
comp18167_g1_i1	485	0.05979381443298969	(CT)n	Simple_repeat	30	[1-30]	0.9666666666666667
comp18179_g1_i1	335	0.11343283582089553	Kolobok-1_SKow/ClassII/?/Kolobok	Unspecified	11323	[2515-2552]	0.0032676852424269186
comp18180_g1_i1	303	0.1188118811881188	Gypsy-18-I_XT	LTR/Gypsy	4419	[2969-3005]	0.008146639511201629
comp18187_g1_i1	915	0.05027322404371585	GYPSI_I-int	LTR/Gypsy	13617	[9101-9151]	0.003671880737313652
comp18204_g1_i1	212	0.22641509433962265	A-rich	Low_complexity	46	[1-46]	0.9782608695652174
comp18205_g1_i1	460	0.09565217391304348	(ATATTA)n	Simple_repeat	44	[1-44]	0.9772727272727273
comp18216_g1_i1	259	0.32432432432432434	EnSpm-11_DR/ClassII/TIR/CACTA	Unspecified	9003	[1451-1531]	0.008885926913251138
comp18224_g1_i1	697	0.03443328550932568	(A)n	Simple_repeat	25	[1-25]	0.96
comp1822_g1_i1	409	0.11246943765281174	(TTTAA)n	Simple_repeat	44	[1-44]	0.9772727272727273
comp18231_g1_i1	232	0.14224137931034483	(T)n	Simple_repeat	34	[1-34]	0.9705882352941176
comp18236_g1_i1	263	0.21292775665399238	EnSpm1_SB/ClassII/TIR/CACTA	Unspecified	14710	[9734-9790]	0.0038069340584636303
comp18240_g1_i1	270	0.17777777777777778	hAT-N4_ALy/ClassII/TIR/hAT	Unspecified	1146	[720-768]	0.041884816753926704
comp18243_g1_i1	291	0.3539518900343643	(GAATATT)n	Simple_repeat	101	[1-101]	0.9900990099009901
comp18250_g1_i1	589	0.05432937181663837	(AT)n	Simple_repeat	34	[1-34]	0.9705882352941176
comp18260_g1_i1	399	0.09774436090225563	(AGTAT)n	Simple_repeat	41	[1-41]	0.975609756097561
comp1827_g1_i1	636	0.23427672955974843	Gypsy-13_PBa-I	LTR/Gypsy	4851	[1703-1852]	0.030715316429602145
comp1827_g1_i2	653	0.22817764165390506	Gypsy-13_PBa-I	LTR/Gypsy	4851	[1703-1852]	0.030715316429602145
comp1827_g2_i1	254	0.23622047244094488	Copia-11_EPa-I	LTR/Copia	3529	[2134-2195]	0.01728534995749504
comp18282_g1_i1	292	0.10273972602739725	GA-rich	Low_complexity	30	[1-30]	0.9666666666666667
comp18286_g1_i1	277	0.27075812274368233	EnSpm-N3_ALy/ClassII/TIR/CACTA	Unspecified	1485	[1264-1350]	0.057912457912457915
comp18289_g1_i1	269	0.2379182156133829	CACTA_LP/ClassII/TIR/CACTA	Unspecified	12483	[3087-3136]	0.003925338460306016
comp18291_g1_i1	538	0.06505576208178439	(CAGG)n	Simple_repeat	36	[1-36]	0.9722222222222222
comp18296_g1_i1	427	0.1288056206088993	A-rich	Low_complexity	51	[1-51]	0.9803921568627451
comp1829_g2_i1	380	0.16052631578947368	piggyBac-N1_DWil/ClassII/TIR/PiggyBac	Unspecified	658	[1-60]	0.08966565349544073
comp18304_g1_i1	218	0.1651376146788991	(GGCT)n	Simple_repeat	37	[1-37]	0.972972972972973
comp18314_g1_i1	290	0.2655172413793103	(CGCTGC)n	Simple_repeat	78	[1-78]	0.9871794871794872
comp18334_g1_i1	308	0.18181818181818182	(TTA)n	Simple_repeat	55	[1-55]	0.9818181818181818
comp18340_g1_i1	248	0.08064516129032258	(AG)n	Simple_repeat	21	[1-21]	0.9523809523809523
comp18342_g1_i1	616	0.10064935064935066	npiggyBac-7_Hmel/ClassII/TIR/PiggyBac	Unspecified	468	[406-468]	0.13247863247863248
comp18346_g1_i1	409	0.2273838630806846	A-rich	Low_complexity	90	[1-90]	0.9888888888888889
comp18347_g1_i1	605	0.05289256198347107	(AAT)n	Simple_repeat	35	[1-35]	0.9714285714285714
comp18348_g1_i1	307	0.18241042345276873	Helitron-N23_LMi/ClassII/Helitron/Helitron	Unspecified	1374	[750-804]	0.039301310043668124
comp1834_g1_i1	979	0.9519918283963228	COPIA-I_MT	LTR/Copia	9359	[5194-6116]	0.0985147985895929
comp1834_g1_i2	877	0.9988597491448119	COPIA-I_MT	LTR/Copia	9359	[5194-6071]	0.09370659258467785
comp18356_g1_i1	511	0.18199608610567514	HELITRON1_DM/ClassII/Helitron/Helitron	Unspecified	564	[352-438]	0.1524822695035461
comp1835_g1_i2	294	0.09183673469387756	(TTAT)n	Simple_repeat	28	[1-28]	0.9642857142857143
comp1837_g1_i1	450	0.14888888888888888	(GAATTTGG)n	Simple_repeat	68	[1-68]	0.9852941176470589
comp18385_g1_i1	464	0.04956896551724138	(CGCT)n	Simple_repeat	24	[1-24]	0.9583333333333334
comp1838_g1_i1	285	0.8947368421052632	Mariner-34_LMi/ClassII/TIR/Tc1-Mariner	Unspecified	1759	[597-807]	0.11938601478112564
comp1838_g2_i1	486	0.6316872427983539	Mariner-N22_LMi/ClassII/TIR/Tc1-Mariner	Unspecified	2204	[895-1228]	0.15108892921960074
comp18391_g1_i1	369	0.15176151761517614	G-rich	Low_complexity	59	[1-59]	0.9830508474576272
comp18397_g1_i1	446	0.15246636771300448	A-rich	Low_complexity	71	[1-71]	0.9859154929577465
comp18398_g1_i1	293	0.14675767918088736	Kolobok-N1_AEc/ClassII/?/Kolobok	Unspecified	8251	[4714-4757]	0.005211489516422252
comp18405_g1_i1	309	0.15857605177993528	A-rich	Low_complexity	50	[1-50]	0.98
comp18413_g1_i1	648	0.06172839506172839	GA-rich	Low_complexity	40	[1-40]	0.975
comp18421_g1_i1	205	0.17560975609756097	(ATCTTGT)n	Simple_repeat	38	[1-38]	0.9736842105263158
comp18441_g1_i1	334	0.06287425149700598	(GCCG)n	Simple_repeat	22	[1-22]	0.9545454545454546
comp1844_g2_i1	704	0.09517045454545454	hATm-27_HM/ClassII/TIR/hAT	Unspecified	3974	[1469-1539]	0.017614494212380472
comp18459_g1_i1	271	0.07380073800738007	(CGAA)n	Simple_repeat	21	[1-21]	0.9523809523809523
comp18463_g1_i1	221	0.47058823529411764	Mariner-N5_AEc/ClassII/TIR/Tc1-Mariner	Unspecified	848	[54-171]	0.13797169811320756
comp18464_g1_i1	277	0.5126353790613718	Gypsy-6_CFl-I	LTR/Gypsy	3952	[295-435]	0.0354251012145749
comp18471_g1_i1	325	0.10153846153846154	(TTAATG)n	Simple_repeat	36	[1-36]	0.9722222222222222
comp18493_g1_i1	356	0.16573033707865167	Gypsy-86_GM-I	LTR/Gypsy	10433	[3270-3329]	0.005655132751845107
comp18499_g1_i1	668	0.04790419161676647	(ATATGT)n	Simple_repeat	34	[1-34]	0.9705882352941176
comp18504_g1_i1	301	0.2857142857142857	piggyBac-N1_HSal/ClassII/TIR/PiggyBac	Unspecified	745	[604-689]	0.11409395973154363
comp18506_g1_i1	534	0.06179775280898876	(AATAA)n	Simple_repeat	34	[1-34]	0.9705882352941176
comp18527_g1_i1	348	0.14942528735632185	(TA)n	Simple_repeat	52	[1-52]	0.9807692307692307
comp18531_g1_i1	221	0.16289592760180996	piggyBac-15_LMi/ClassII/TIR/PiggyBac	Unspecified	2444	[1-37]	0.014729950900163666
comp18552_g1_i1	376	0.07446808510638298	(GA)n	Simple_repeat	29	[1-29]	0.9655172413793104
comp18559_g1_i1	472	0.08898305084745763	(CGG)n	Simple_repeat	41	[1-41]	0.975609756097561
comp1855_g1_i1	292	0.1780821917808219	(TCAAATAT)n	Simple_repeat	53	[1-53]	0.9811320754716981
comp18565_g1_i1	311	0.1382636655948553	GA-rich	Low_complexity	47	[1-47]	0.9787234042553191
comp1856_g3_i1	249	0.8514056224899599	Mariner-68_HSal/ClassII/TIR/Tc1-Mariner	Unspecified	2158	[42-256]	0.09916589434661724
comp18571_g1_i1	411	0.1362530413625304	A-rich	Low_complexity	62	[1-62]	0.9838709677419355
comp18577_g1_i1	821	0.05115712545676005	(AGTAAC)n	Simple_repeat	41	[1-41]	0.975609756097561
comp1858_g1_i1	277	0.16967509025270758	Kolobok-N1_AEc/ClassII/?/Kolobok	Unspecified	8251	[4713-4760]	0.0056962792388801356
comp1858_g1_i2	243	0.1934156378600823	Kolobok-N1_AEc/ClassII/?/Kolobok	Unspecified	8251	[4713-4760]	0.0056962792388801356
comp1858_g1_i3	285	0.1543859649122807	Mariner-N2_PBa/ClassII/TIR/Tc1-Mariner	Unspecified	3127	[2978-3021]	0.013751199232491206
comp1859_g1_i1	229	0.18777292576419213	(ATAAATA)n	Simple_repeat	44	[1-44]	0.9772727272727273
comp1859_g2_i1	370	0.12432432432432433	(A)n	Simple_repeat	47	[1-47]	0.9787234042553191
comp18602_g1_i1	227	0.23788546255506607	Copia-9_BRa-I	LTR/Copia	4185	[2478-2532]	0.012903225806451613
comp18604_g1_i1	411	0.09245742092457421	piggyBac-N1_HSal/ClassII/TIR/PiggyBac	Unspecified	745	[706-745]	0.052348993288590606
comp18608_g1_i1	389	0.13624678663239073	(CATTATT)n	Simple_repeat	53	[1-53]	0.9811320754716981
comp18613_g1_i1	432	0.2199074074074074	(ATGATA)n	Simple_repeat	94	[1-94]	0.9893617021276596
comp18622_g1_i1	250	0.212	Gypsy-18_SI-I	LTR/Gypsy	4575	[2661-2714]	0.011584699453551913
comp18635_g1_i1	254	0.1732283464566929	(TCATTT)n	Simple_repeat	43	[1-43]	0.9767441860465116
comp18648_g1_i1	212	0.8018867924528302	Tx1-4_AAe	LINE/L1	5066	[1478-1651]	0.0341492301618634
comp18651_g1_i1	280	0.09642857142857143	(GAAC)n	Simple_repeat	27	[1-27]	0.9629629629629629
comp18669_g1_i1	293	0.08532423208191127	(TC)n	Simple_repeat	26	[1-26]	0.9615384615384616
comp18702_g1_i1	467	0.10920770877944326	Helitron-N3_DR/ClassII/Helitron/Helitron	Unspecified	3016	[2073-2125]	0.017241379310344827
comp18704_g1_i1	581	0.20481927710843373	Mariner-26_SIn/ClassII/TIR/Tc1-Mariner	Unspecified	1266	[1134-1257]	0.0971563981042654
comp18719_g1_i1	424	0.12264150943396226	Copia-3_TC-I	LTR/Copia	4754	[3692-3742]	0.01051745898190997
comp18729_g1_i1	548	0.04744525547445255	(AT)n	Simple_repeat	29	[1-29]	0.9655172413793104
comp18743_g1_i1	223	0.23766816143497757	hAT6-2_NV/ClassII/TIR/hAT	Unspecified	6317	[2634-2684]	0.007915149596327371
comp18747_g1_i1	564	0.04609929078014184	A-rich	Low_complexity	28	[1-28]	0.9642857142857143
comp18753_g1_i1	638	0.07523510971786834	(ATTATAT)n	Simple_repeat	46	[1-46]	0.9782608695652174
comp18754_g1_i1	272	0.10661764705882353	Mariner3-2_HSal/ClassII/TIR/Tc1-Mariner	Unspecified	2185	[16-45]	0.013272311212814645
comp1876_g1_i1	697	0.35581061692969873	Kolobok-1_PBa/ClassII/?/Kolobok	Unspecified	1561	[1094-1343]	0.15951313260730302
comp1876_g1_i2	279	0.3225806451612903	Kolobok-1_PBa/ClassII/?/Kolobok	Unspecified	1561	[1094-1184]	0.057655349135169766
comp18776_g1_i1	479	0.08559498956158663	Tx1-TGTA-1_SK	LINE/L1	4970	[1894-1932]	0.007645875251509054
comp18782_g1_i1	505	0.08118811881188119	A-rich	Low_complexity	38	[1-38]	0.9736842105263158
comp18784_g1_i1	285	0.0912280701754386	(TATTT)n	Simple_repeat	27	[1-27]	0.9629629629629629
comp18792_g1_i1	564	0.5053191489361702	DNA6-13B_CGi/ClassII/?/?	Unspecified	1212	[825-1172]	0.2863036303630363
comp18808_g1_i1	407	0.08108108108108109	(CGACA)n	Simple_repeat	34	[1-34]	0.9705882352941176
comp18809_g1_i1	428	0.1822429906542056	(AAT)n	Simple_repeat	77	[1-77]	0.987012987012987
comp18812_g1_i1	518	0.08301158301158301	(TAA)n	Simple_repeat	44	[1-44]	0.9772727272727273
comp18815_g1_i1	242	0.3181818181818182	(AATATA)n	Simple_repeat	72	[1-72]	0.9861111111111112
comp18816_g1_i1	287	0.07665505226480836	(GCTC)n	Simple_repeat	23	[1-23]	0.9565217391304348
comp18818_g1_i1	559	0.1037567084078712	I-51_AAe	LINE/I	7023	[3952-4012]	0.00854335753951303
comp18825_g1_i1	440	0.08636363636363636	piggyBac-10_SM/ClassII/TIR/PiggyBac	Unspecified	2648	[1-39]	0.014350453172205438
comp18838_g1_i1	569	0.04569420035149385	(TATAA)n	Simple_repeat	28	[1-28]	0.9642857142857143
comp18843_g1_i1	402	0.13930348258706468	(ATTTAGT)n	Simple_repeat	57	[1-57]	0.9824561403508771
comp1884_g1_i1	759	0.41238471673254284	Copia-9_SI-I	LTR/Copia	4381	[2618-2936]	0.07258616754165716
comp1884_g1_i2	410	0.7	Copia-9_SI-I	LTR/Copia	4381	[2618-2911]	0.06687970782926272
comp18851_g1_i1	451	0.164079822616408	(TA)n	Simple_repeat	71	[1-71]	0.9859154929577465
comp1885_g1_i1	217	0.16129032258064516	A-rich	Low_complexity	37	[1-37]	0.972972972972973
comp18860_g1_i1	449	0.21380846325167038	Gypsy18-PTR_I_	2	7283	[7130-7228]	0.01345599340930935
comp18864_g1_i1	446	0.14573991031390135	Charlie12_	2/ClassII/TIR/hAT	2873	[34-102]	0.023668639053254437
comp18865_g1_i1	351	0.6210826210826211	Gypsy-9_PBa-I	LTR/Gypsy	9980	[2734-2951]	0.021743486973947897
comp18869_g1_i1	474	0.6455696202531646	Helitron-7_CGi/ClassII/Helitron/Helitron	Unspecified	12071	[1577-1844]	0.022119128489768866
comp18883_g1_i1	515	0.07378640776699029	(TTAA)n	Simple_repeat	39	[1-39]	0.9743589743589743
comp18885_g1_i1	454	0.07709251101321586	(ATATCT)n	Simple_repeat	35	[1-35]	0.9714285714285714
comp1888_g1_i1	1094	0.062157221206581355	Gypsy-12_PBa-I	LTR/Gypsy	7718	[1432-1500]	0.00881057268722467
comp18890_g1_i1	336	0.16666666666666666	CR1-127_AAe	LINE/Jockey	4561	[1075-1128]	0.011620258715194036
comp18899_g1_i1	277	0.13357400722021662	A-rich	Low_complexity	40	[1-40]	0.975
comp18901_g1_i1	355	0.4140845070422535	Mariner-13_AEc/ClassII/TIR/Tc1-Mariner	Unspecified	1300	[205-352]	0.11307692307692307
comp18909_g1_i1	600	0.935	Gypsy-5_TCa-I	LTR/Gypsy	4106	[1074-1779]	0.17169995129079396
comp1890_g1_i2	377	0.2413793103448276	Mariner-N27_HSal/ClassII/TIR/Tc1-Mariner	Unspecified	1191	[1-101]	0.08396305625524769
comp18917_g1_i1	328	0.42073170731707316	DNA-2N1_PBa/ClassII/?/?	Unspecified	1194	[351-488]	0.11474036850921274
comp18929_g1_i1	389	0.35732647814910024	HMSBEAGLE_I-int	LTR/Gypsy	6529	[845-980]	0.020676979629345994
comp18930_g1_i1	462	0.049783549783549784	(GC)n	Simple_repeat	25	[1-25]	0.96
comp18932_g1_i1	247	0.10526315789473684	Kolobok-1_SIn/ClassII/?/Kolobok	Unspecified	2775	[2220-2246]	0.009369369369369369
comp18955_g1_i1	301	0.06976744186046512	(GCAC)n	Simple_repeat	22	[1-22]	0.9545454545454546
comp1895_g2_i1	761	0.06307490144546649	Vingi-10_LMi	LINE/?	1871	[965-1015]	0.02672367717797969
comp18962_g1_i1	382	0.09947643979057591	(AG)n	Simple_repeat	40	[1-40]	0.975
comp18977_g1_i1	325	0.052307692307692305	(CG)n	Simple_repeat	18	[1-18]	0.9444444444444444
comp18978_g1_i1	278	0.1366906474820144	(TTACA)n	Simple_repeat	40	[1-40]	0.975
comp18986_g1_i1	325	0.3292307692307692	GA-rich	Low_complexity	108	[1-108]	0.9907407407407407
comp18992_g1_i1	397	0.18387909319899245	(ATTTAT)n	Simple_repeat	72	[1-72]	0.9861111111111112
comp18999_g1_i1	856	0.0689252336448598	(TAAT)n	Simple_repeat	61	[1-61]	0.9836065573770492
comp19006_g1_i1	345	0.15942028985507245	CR1-79_HM	LINE/Jockey	4883	[4413-4469]	0.011468359614990785
comp19017_g1_i1	619	0.050080775444264945	G-rich	Low_complexity	32	[1-32]	0.96875
comp1902_g1_i1	447	0.15436241610738255	L1-58_ACar	LINE/L1	6685	[6438-6508]	0.010471204188481676
comp19036_g1_i1	486	0.16049382716049382	Sola2-1_EmiHux/ClassII/?/Sola	Unspecified	7442	[5255-5333]	0.010481053480247245
comp1903_g1_i1	530	0.06981132075471698	(ATTA)n	Simple_repeat	37	[1-37]	0.972972972972973
comp19040_g1_i1	301	0.42857142857142855	Mariner-N15_HSal/ClassII/TIR/Tc1-Mariner	Unspecified	2024	[1886-2024]	0.06818181818181818
comp19047_g1_i1	724	0.0649171270718232	(ATTAAT)n	Simple_repeat	48	[1-48]	0.9791666666666666
comp19062_g1_i1	311	0.15112540192926044	hAT-N36_LMi/ClassII/TIR/hAT	Unspecified	2417	[1655-1702]	0.019445593711212246
comp19081_g1_i1	271	0.3025830258302583	LIN14_SM	LINE/R2	7729	[1213-1298]	0.010997541725967137
comp19082_g1_i1	415	0.10361445783132531	(CCG)n	Simple_repeat	44	[1-44]	0.9772727272727273
comp19088_g1_i1	479	0.12526096033402923	DNA6-6_DR/ClassII/?/?	Unspecified	11281	[9978-10033]	0.004875454303696481
comp1908_g2_i1	548	0.08211678832116788	A-rich	Low_complexity	46	[1-46]	0.9782608695652174
comp19099_g1_i1	555	0.13153153153153152	DNA-2-18_DR/ClassII/?/?	Unspecified	3225	[1211-1280]	0.021395348837209303
comp19110_g1_i1	529	0.07939508506616257	A-rich	Low_complexity	43	[1-43]	0.9767441860465116
comp19114_g1_i1	747	0.03480589022757698	A-rich	Low_complexity	27	[1-27]	0.9629629629629629
comp19124_g1_i1	298	0.1174496644295302	(CCTCCT)n	Simple_repeat	36	[1-36]	0.9722222222222222
comp19133_g1_i1	633	0.053712480252764615	(ATT)n	Simple_repeat	36	[1-36]	0.9722222222222222
comp19151_g1_i1	476	0.07563025210084033	(ATATT)n	Simple_repeat	40	[1-40]	0.975
comp19153_g1_i1	408	0.056372549019607844	(ATAC)n	Simple_repeat	24	[1-24]	0.9583333333333334
comp19162_g1_i1	491	0.08961303462321792	A-rich	Low_complexity	45	[1-45]	0.9777777777777777
comp19166_g1_i1	272	0.21691176470588236	Mariner-N15_HSal/ClassII/TIR/Tc1-Mariner	Unspecified	2024	[1965-2024]	0.0291501976284585
comp19167_g1_i1	363	0.15977961432506887	Transib-7_HM/ClassII/TIR/Transib	Unspecified	3036	[207-266]	0.019433465085639
comp19172_g1_i1	431	0.07424593967517401	(AAGA)n	Simple_repeat	32	[1-32]	0.96875
comp19186_g1_i1	408	0.15441176470588236	(TCCAGA)n	Simple_repeat	68	[1-68]	0.9852941176470589
comp19198_g1_i1	324	0.10185185185185185	(TTTGAT)n	Simple_repeat	36	[1-36]	0.9722222222222222
comp19205_g1_i1	384	0.19270833333333334	(ATATAA)n	Simple_repeat	73	[1-73]	0.9863013698630136
comp1920_g1_i1	349	0.9570200573065902	R1-5_BM	LINE/I	5102	[3263-3544]	0.05507644061152489
comp1920_g2_i1	556	0.37949640287769787	HOPEBm2	LINE/I	4047	[2073-2260]	0.0462070669631826
comp19218_g1_i1	842	0.08432304038004751	Kolobok-N1_AEc/ClassII/?/Kolobok	Unspecified	8251	[4688-4756]	0.008241425281784027
comp19226_g1_i1	321	0.14330218068535824	(TCTTT)n	Simple_repeat	46	[1-46]	0.9782608695652174
comp19228_g1_i1	421	0.09026128266033254	A-rich	Low_complexity	39	[1-39]	0.9743589743589743
comp19231_g1_i1	620	0.05	(TTTA)n	Simple_repeat	34	[1-34]	0.9705882352941176
comp19254_g1_i1	347	0.06628242074927954	(AG)n	Simple_repeat	24	[1-24]	0.9583333333333334
comp19256_g1_i1	667	0.035982008995502246	(AAGG)n	Simple_repeat	24	[1-24]	0.9583333333333334
comp19261_g1_i1	469	0.057569296375266525	(TGG)n	Simple_repeat	28	[1-28]	0.9642857142857143
comp19264_g1_i1	594	0.22895622895622897	GA-rich	Low_complexity	132	[1-132]	0.9924242424242424
comp19266_g1_i1	317	0.11987381703470032	Tx1-3_CGi	LINE/L1	5505	[3302-3342]	0.007266121707538601
comp1927_g2_i1	321	0.13707165109034267	(TTCTC)n	Simple_repeat	48	[1-48]	0.9791666666666666
comp19286_g1_i1	297	0.11447811447811448	(TTTC)n	Simple_repeat	36	[1-36]	0.9722222222222222
comp19305_g1_i1	613	0.04404567699836868	(AATT)n	Simple_repeat	28	[1-28]	0.9642857142857143
comp19312_g1_i1	286	0.0979020979020979	DNA8-10_DR/ClassII/?/?	Unspecified	4018	[1652-1711]	0.014683922349427576
comp19314_g1_i1	263	0.08365019011406843	(GA)n	Simple_repeat	23	[1-23]	0.9565217391304348
comp19327_g1_i1	322	0.2639751552795031	Copia-88_CCri-I	LTR/Copia	6185	[5020-5110]	0.014551333872271624
comp19341_g1_i1	317	0.19558359621451105	(ATCTCCG)n	Simple_repeat	68	[1-68]	0.9852941176470589
comp19345_g1_i1	577	0.05199306759098787	(TAAT)n	Simple_repeat	30	[1-30]	0.9666666666666667
comp1935_g1_i1	205	0.2	npiggyBac-1_EF/ClassII/TIR/PiggyBac	Unspecified	90	[1-42]	0.45555555555555555
comp1935_g2_i1	617	0.16369529983792544	Chapaev3-5_HM/ClassII/?/Chapaev	Unspecified	2555	[26-130]	0.040704500978473585
comp19360_g1_i1	409	0.1271393643031785	Copia-15_ECa-I	LTR/Copia	4990	[1307-1357]	0.01002004008016032
comp19361_g1_i1	792	0.06818181818181818	(TTTAA)n	Simple_repeat	57	[1-57]	0.9824561403508771
comp19364_g1_i1	275	0.12	(ATTAAT)n	Simple_repeat	34	[1-34]	0.9705882352941176
comp19371_g1_i1	371	0.1725067385444744	G-rich	Low_complexity	65	[1-65]	0.9846153846153847
comp19376_g1_i1	572	0.08916083916083917	Gypsy-18_OD-I	LTR/Gypsy	8432	[5543-5595]	0.006166982922201139
comp19383_g1_i1	393	0.13486005089058525	(ATTT)n	Simple_repeat	56	[1-56]	0.9821428571428571
comp19394_g1_i1	589	0.028862478777589132	(GA)n	Simple_repeat	18	[1-18]	0.9444444444444444
comp19401_g1_i1	515	0.06796116504854369	piggyBac-N1_DWil/ClassII/TIR/PiggyBac	Unspecified	658	[1-36]	0.05319148936170213
comp19405_g1_i1	395	0.11139240506329114	(CTTCTTCAA)n	Simple_repeat	45	[1-45]	0.9777777777777777
comp19412_g1_i1	422	0.13507109004739337	A-rich	Low_complexity	55	[1-55]	0.9818181818181818
comp19414_g1_i1	325	0.07384615384615385	(AT)n	Simple_repeat	28	[1-28]	0.9642857142857143
comp19425_g1_i1	407	0.12776412776412777	(GGCGGAT)n	Simple_repeat	53	[1-53]	0.9811320754716981
comp19431_g1_i1	638	0.03134796238244514	(AG)n	Simple_repeat	21	[1-21]	0.9523809523809523
comp19439_g1_i1	439	0.14123006833712984	LTR39A2_SSc	LTR/ERV	574	[469-528]	0.10278745644599303
comp19442_g1_i1	271	0.07749077490774908	(CGGC)n	Simple_repeat	22	[1-22]	0.9545454545454546
comp1945_g1_i1	827	0.6989117291414753	hAT-4_PBa/ClassII/TIR/hAT	Unspecified	6675	[829-1422]	0.08883895131086142
comp19463_g1_i1	349	0.11174785100286533	(TCAG)n	Simple_repeat	40	[1-40]	0.975
comp19465_g1_i1	325	0.09230769230769231	(ATAT)n	Simple_repeat	31	[1-31]	0.967741935483871
comp19466_g1_i1	543	0.07550644567219153	(TGTCCA)n	Simple_repeat	48	[1-48]	0.9791666666666666
comp19470_g1_i1	450	0.044444444444444446	(GT)n	Simple_repeat	21	[1-21]	0.9523809523809523
comp19475_g1_i1	535	0.05420560747663551	(GGCGA)n	Simple_repeat	32	[1-32]	0.96875
comp19484_g1_i1	453	0.07947019867549669	(CCG)n	Simple_repeat	37	[1-37]	0.972972972972973
comp19490_g1_i1	212	0.7169811320754716	piggyBac-13_SM/ClassII/TIR/PiggyBac	Unspecified	2554	[1694-1826]	0.05168363351605325
comp19492_g1_i1	276	0.09057971014492754	(GCG)n	Simple_repeat	26	[1-26]	0.9615384615384616
comp19497_g1_i1	652	0.1196319018404908	(ATA)n	Simple_repeat	75	[1-75]	0.9866666666666667
comp19509_g1_i1	310	0.18387096774193548	hAT-N122_DR/ClassII/TIR/hAT	Unspecified	577	[424-489]	0.11265164644714037
comp1950_g1_i1	1015	0.06896551724137931	hAT-N4_ALy/ClassII/TIR/hAT	Unspecified	1146	[754-833]	0.06893542757417102
comp19514_g1_i1	212	0.10377358490566038	(TC)n	Simple_repeat	23	[1-23]	0.9565217391304348
comp19516_g1_i1	354	0.09887005649717515	(ATATAA)n	Simple_repeat	36	[1-36]	0.9722222222222222
comp19520_g1_i1	258	0.18992248062015504	Tx1-11_CGi	LINE/L1	6842	[5037-5089]	0.007600116924875768
comp19532_g1_i1	365	0.13972602739726028	GA-rich	Low_complexity	53	[1-53]	0.9811320754716981
comp19536_g1_i1	431	0.12761020881670534	LTR135_MD	LTR/Retrovirus	825	[4-60]	0.06787878787878789
comp19548_g1_i1	314	0.1337579617834395	(TTTCTT)n	Simple_repeat	45	[1-45]	0.9777777777777777
comp19558_g1_i1	488	0.0778688524590164	(AATTA)n	Simple_repeat	39	[1-39]	0.9743589743589743
comp19568_g1_i1	328	0.10670731707317073	(AG)n	Simple_repeat	39	[1-39]	0.9743589743589743
comp19571_g1_i1	347	0.9394812680115274	Gypsy-6_BM-I	LTR/Gypsy	10153	[4778-5324]	0.05377720870678617
comp19587_g1_i1	731	0.12175102599179206	(GTACA)n	Simple_repeat	90	[1-90]	0.9888888888888889
comp19591_g1_i1	458	0.15283842794759825	Mariner-1_ACar/ClassII/TIR/Tc1-Mariner	Unspecified	1350	[1-73]	0.05333333333333334
comp19592_g1_i1	418	0.12200956937799043	(AATTA)n	Simple_repeat	48	[1-48]	0.9791666666666666
comp1959_g1_i1	334	0.16167664670658682	Copia-35_BD-I	LTR/Copia	4346	[1683-1736]	0.012195121951219513
comp19608_g1_i1	357	0.11204481792717087	(TTA)n	Simple_repeat	41	[1-41]	0.975609756097561
comp19612_g1_i1	282	0.09219858156028368	(ATATT)n	Simple_repeat	28	[1-28]	0.9642857142857143
comp19614_g1_i1	284	0.23943661971830985	Kolobok-1_SIn/ClassII/?/Kolobok	Unspecified	2775	[1792-1860]	0.024504504504504504
comp19615_g1_i1	450	0.10888888888888888	(TTCGT)n	Simple_repeat	50	[1-50]	0.98
comp19618_g1_i1	620	0.056451612903225805	(T)n	Simple_repeat	36	[1-36]	0.9722222222222222
comp19620_g1_i1	259	0.23166023166023167	(GGCGCG)n	Simple_repeat	57	[1-57]	0.9824561403508771
comp19621_g1_i1	671	0.09090909090909091	GA-rich	Low_complexity	64	[1-64]	0.984375
comp19624_g1_i1	577	0.10398613518197573	piggyBac-N2A_XT/ClassII/TIR/PiggyBac	Unspecified	3782	[320-373]	0.014013749338974087
comp19627_g1_i1	459	0.1721132897603486	Gypsy-40_Mad-I	LTR/Gypsy	3731	[1189-1264]	0.020101849370142054
comp19631_g1_i1	620	0.06451612903225806	Copia2-I_TP	LTR/Copia	3500	[2888-2929]	0.011714285714285714
comp1963_g1_i1	816	0.33088235294117646	R1-1_AEc	LINE/I	3994	[2855-3089]	0.058587881822734104
comp19641_g1_i1	285	0.256140350877193	(TA)n	Simple_repeat	77	[1-77]	0.987012987012987
comp19645_g1_i1	264	0.07575757575757576	(AGG)n	Simple_repeat	21	[1-21]	0.9523809523809523
comp19653_g1_i1	432	0.09259259259259259	A-rich	Low_complexity	42	[1-42]	0.9761904761904762
comp19655_g1_i1	1149	0.05918189730200174	(CGAATC)n	Simple_repeat	69	[1-69]	0.9855072463768116
comp19657_g1_i1	443	0.09480812641083522	(CTCTGCC)n	Simple_repeat	45	[1-45]	0.9777777777777777
comp19669_g1_i1	424	0.10613207547169812	Jockey-2_DGri	LINE/Jockey	6032	[699-746]	0.007791777188328912
comp19675_g1_i1	699	0.07296137339055794	(ATTTT)n	Simple_repeat	51	[1-51]	0.9803921568627451
comp19678_g1_i1	370	0.11081081081081082	(GCT)n	Simple_repeat	42	[1-42]	0.9761904761904762
comp19681_g1_i1	450	0.1111111111111111	(TATTT)n	Simple_repeat	50	[1-50]	0.98
comp19684_g1_i1	226	0.1415929203539823	(TGGAAATT)n	Simple_repeat	34	[1-34]	0.9705882352941176
comp19684_g2_i1	262	0.21755725190839695	HELITRON9A_CB/ClassII/Helitron/Helitron	Unspecified	1543	[442-502]	0.03888528839922229
comp19686_g1_i1	321	0.11838006230529595	piggyBac-N1_HSal/ClassII/TIR/PiggyBac	Unspecified	745	[707-745]	0.05100671140939597
comp19691_g1_i1	489	0.08997955010224949	(GTTGGAC)n	Simple_repeat	48	[1-48]	0.9791666666666666
comp19701_g1_i1	220	0.35454545454545455	Mariner-42_HSal/ClassII/TIR/Tc1-Mariner	Unspecified	1287	[1209-1287]	0.06060606060606061
comp1970_g1_i1	296	0.7466216216216216	Gypsy-7_LH-I	LTR/Gypsy	4707	[3061-3282]	0.04695134905459953
comp1970_g1_i2	681	0.8781204111600588	Gypsy-7_LH-I	LTR/Gypsy	4707	[3061-3658]	0.1268323773103888
comp1972_g1_i1	531	0.2975517890772128	Mariner-1_DK/ClassII/TIR/Tc1-Mariner	Unspecified	1641	[1041-1193]	0.09262644728823888
comp19750_g1_i1	350	0.10857142857142857	(TAT)n	Simple_repeat	39	[1-39]	0.9743589743589743
comp19775_g1_i1	608	0.05592105263157895	(CAATTTT)n	Simple_repeat	36	[1-36]	0.9722222222222222
comp19782_g1_i1	275	0.7236363636363636	Mariner-56_HSal/ClassII/TIR/Tc1-Mariner	Unspecified	1275	[133-330]	0.15450980392156863
comp19807_g1_i1	336	0.29464285714285715	HATN11B_DR/ClassII/TIR/hAT	Unspecified	690	[435-529]	0.13623188405797101
comp19838_g1_i1	253	0.08695652173913043	(GC)n	Simple_repeat	24	[1-24]	0.9583333333333334
comp1983_g1_i1	799	0.03504380475594493	(GCGGA)n	Simple_repeat	30	[1-30]	0.9666666666666667
comp19851_g1_i1	228	0.17543859649122806	(GA)n	Simple_repeat	41	[1-41]	0.975609756097561
comp19853_g1_i1	272	0.1213235294117647	(CCTCC)n	Simple_repeat	34	[1-34]	0.9705882352941176
comp19854_g1_i1	619	0.05654281098546042	(TACCCGT)n	Simple_repeat	37	[1-37]	0.972972972972973
comp19858_g1_i1	424	0.05188679245283019	(CGA)n	Simple_repeat	23	[1-23]	0.9565217391304348
comp19863_g1_i1	250	0.124	(GA)n	Simple_repeat	33	[1-33]	0.9696969696969697
comp1986_g1_i1	472	0.1038135593220339	(ATATTT)n	Simple_repeat	48	[1-48]	0.9791666666666666
comp1986_g1_i2	556	0.08812949640287769	(ATATTT)n	Simple_repeat	48	[1-48]	0.9791666666666666
comp19886_g1_i1	296	0.14189189189189189	(ATTGTTTA)n	Simple_repeat	46	[1-46]	0.9782608695652174
comp19892_g1_i1	272	0.29044117647058826	RTE-1C_DAn	LINE/RTE	3243	[6-85]	0.024360160345359236
comp19895_g1_i1	382	0.10209424083769633	A-rich	Low_complexity	40	[1-40]	0.975
comp19895_g1_i2	382	0.060209424083769635	(TATA)n	Simple_repeat	24	[1-24]	0.9583333333333334
comp19899_g1_i1	322	0.052795031055900624	(TA)n	Simple_repeat	18	[1-18]	0.9444444444444444
comp19902_g1_i1	439	0.12984054669703873	A-rich	Low_complexity	57	[1-57]	0.9824561403508771
comp19908_g1_i1	349	0.19197707736389685	DNA4-42B_CGi/ClassII/?/?	Unspecified	2899	[2061-2130]	0.023801310796826493
comp1991_g1_i1	216	0.17592592592592593	A-rich	Low_complexity	37	[1-37]	0.972972972972973
comp19927_g1_i1	341	0.08211143695014662	(ATCA)n	Simple_repeat	29	[1-29]	0.9655172413793104
comp19933_g1_i1	340	0.08529411764705883	(GAGC)n	Simple_repeat	30	[1-30]	0.9666666666666667
comp19933_g2_i1	245	0.1836734693877551	(CGACG)n	Simple_repeat	48	[1-48]	0.9791666666666666
comp19944_g1_i1	302	0.0728476821192053	(GGC)n	Simple_repeat	23	[1-23]	0.9565217391304348
comp19950_g1_i1	517	0.18375241779497098	GA-rich	Low_complexity	98	[1-98]	0.9897959183673469
comp19957_g1_i1	653	0.08116385911179173	(ATT)n	Simple_repeat	55	[1-55]	0.9818181818181818
comp19975_g1_i1	289	0.18685121107266436	Transib5/ClassII/TIR/Transib	Unspecified	3001	[1649-1703]	0.017994001999333556
comp19987_g1_i1	311	0.2958199356913183	MARIAM1/ClassII/TIR/Tc1-Mariner	Unspecified	1284	[1119-1210]	0.07087227414330217
comp19989_g1_i1	242	0.9834710743801653	Gypsy-228_AA-I	LTR/Gypsy	4307	[2461-2667]	0.04782911539354539
comp19998_g1_i1	413	0.09927360774818401	(AATGAAC)n	Simple_repeat	45	[1-45]	0.9777777777777777
comp19999_g1_i1	321	0.2803738317757009	GA-rich	Low_complexity	94	[1-94]	0.9893617021276596
comp20000_g1_i1	265	0.12452830188679245	AgaP15/ClassII/TIR/P	Unspecified	5462	[2424-2457]	0.0060417429512998905
comp20006_g1_i1	560	0.10178571428571428	(TTC)n	Simple_repeat	54	[1-54]	0.9814814814814815
comp20013_g1_i1	373	0.08042895442359249	(GTCGT)n	Simple_repeat	31	[1-31]	0.967741935483871
comp20014_g1_i1	334	0.17065868263473055	(ATATA)n	Simple_repeat	56	[1-56]	0.9821428571428571
comp20015_g1_i1	419	0.10501193317422435	(AT)n	Simple_repeat	49	[1-49]	0.9795918367346939
comp20018_g1_i1	461	0.0911062906724512	(TTCT)n	Simple_repeat	43	[1-43]	0.9767441860465116
comp20021_g1_i1	277	0.2743682310469314	EnSpm-20_CCri/ClassII/TIR/CACTA	Unspecified	11606	[2247-2323]	0.006548337067034293
comp20024_g1_i1	338	0.4230769230769231	NeSL-1_CBri	LINE/R2	3562	[307-458]	0.042391914654688376
comp20029_g1_i1	230	0.21304347826086956	(ATT)n	Simple_repeat	48	[1-48]	0.9791666666666666
comp20037_g1_i1	260	0.18076923076923077	(TAATAA)n	Simple_repeat	47	[1-47]	0.9787234042553191
comp20048_g1_i1	373	0.06970509383378017	(ATT)n	Simple_repeat	29	[1-29]	0.9655172413793104
comp20049_g1_i1	221	0.10407239819004525	(AG)n	Simple_repeat	24	[1-24]	0.9583333333333334
comp20056_g1_i1	415	0.09156626506024096	A-rich	Low_complexity	40	[1-40]	0.975
comp20057_g1_i1	413	0.12106537530266344	(TAA)n	Simple_repeat	51	[1-51]	0.9803921568627451
comp20060_g1_i1	406	0.29310344827586204	Mariner-13_AEc/ClassII/TIR/Tc1-Mariner	Unspecified	1300	[1159-1285]	0.09692307692307692
comp20062_g1_i1	377	0.06896551724137931	(TA)n	Simple_repeat	27	[1-27]	0.9629629629629629
comp20074_g1_i1	303	0.23432343234323433	(GCGAGAG)n	Simple_repeat	70	[1-70]	0.9857142857142858
comp20077_g1_i1	261	0.4482758620689655	DNA2-2_SM/ClassII/?/?	Unspecified	288	[175-288]	0.3923611111111111
comp20082_g1_i1	222	0.15315315315315314	(AATTGAA)n	Simple_repeat	35	[1-35]	0.9714285714285714
comp20087_g1_i1	902	0.03436807095343681	A-rich	Low_complexity	33	[1-33]	0.9696969696969697
comp20099_g1_i1	484	0.10537190082644628	DIRS-4_DR	DIRS/DIRS	6796	[322-374]	0.007651559741024131
comp20103_g1_i1	280	0.3392857142857143	(TTAGTA)n	Simple_repeat	98	[1-98]	0.9897959183673469
comp20107_g1_i1	240	0.11666666666666667	(TGT)n	Simple_repeat	29	[1-29]	0.9655172413793104
comp20109_g1_i1	509	0.08447937131630648	(ATT)n	Simple_repeat	44	[1-44]	0.9772727272727273
comp20113_g1_i1	557	0.09515260323159784	Copia-2_SL-I	LTR/Copia	4071	[489-539]	0.012281994595922378
comp20119_g1_i1	319	0.5924764890282131	Mariner-19_SSa/ClassII/TIR/Tc1-Mariner	Unspecified	1650	[1013-1274]	0.15818181818181817
comp20126_g1_i1	431	0.3805104408352668	Mariner-68_HSal/ClassII/TIR/Tc1-Mariner	Unspecified	2307	[117-278]	0.06978760294755093
comp20128_g1_i1	573	0.07678883071553229	CR1-1_IS	LINE/Jockey	3022	[1463-1505]	0.013898080741230973
comp2012_g1_i2	403	0.11662531017369727	Kolobok-N1_AEc/ClassII/?/Kolobok	Unspecified	8251	[4713-4760]	0.0056962792388801356
comp20131_g1_i1	431	0.19721577726218098	MARIAM1/ClassII/TIR/Tc1-Mariner	Unspecified	1284	[1081-1173]	0.07165109034267912
comp2013_g1_i1	583	0.5763293310463122	Gypsy10-NVi_I-int	LTR/Gypsy	4775	[2674-3081]	0.08523560209424083
comp2013_g1_i2	526	0.6330798479087453	Gypsy10-NVi_I-int	LTR/Gypsy	4775	[2674-3081]	0.08523560209424083
comp20164_g1_i1	292	0.0958904109589041	(T)n	Simple_repeat	29	[1-29]	0.9655172413793104
comp20172_g1_i1	433	0.08545034642032333	(TATATG)n	Simple_repeat	39	[1-39]	0.9743589743589743
comp20184_g1_i1	514	0.05252918287937743	(AATCA)n	Simple_repeat	28	[1-28]	0.9642857142857143
comp20204_g1_i1	275	0.11636363636363636	A-rich	Low_complexity	33	[1-33]	0.9696969696969697
comp20206_g1_i1	428	0.1939252336448598	Gypsy-25_LBS-I	LTR/Gypsy	18796	[19-109]	0.004788252819748883
comp20208_g1_i1	555	0.06486486486486487	(TATAT)n	Simple_repeat	39	[1-39]	0.9743589743589743
comp20214_g1_i1	439	0.1571753986332574	Gypsy-69_PAb-I	LTR/Gypsy	4950	[342-410]	0.013737373737373737
comp20215_g1_i1	720	0.08333333333333333	Gypsy-10_SCH-I	LTR/Gypsy	9299	[7924-7984]	0.006452306699645123
comp20232_g1_i1	504	0.09126984126984126	(TTCCTG)n	Simple_repeat	45	[1-45]	0.9777777777777777
comp20236_g1_i1	405	0.09135802469135802	(TAA)n	Simple_repeat	39	[1-39]	0.9743589743589743
comp20237_g1_i1	264	0.2840909090909091	A-rich	Low_complexity	73	[1-73]	0.9863013698630136
comp2024_g1_i1	395	0.17974683544303796	piggyBac-1_BM/ClassII/TIR/PiggyBac	Unspecified	2467	[2394-2467]	0.02959059586542359
comp20253_g1_i1	277	0.08303249097472924	(GAA)n	Simple_repeat	24	[1-24]	0.9583333333333334
comp20255_g1_i1	472	0.11864406779661017	(CTC)n	Simple_repeat	58	[1-58]	0.9827586206896551
comp20262_g1_i1	465	0.853763440860215	Copia-1_DEl-I	LTR/Copia	4177	[1298-1723]	0.10174766578884367
comp20268_g1_i1	275	0.16727272727272727	(TA)n	Simple_repeat	48	[1-48]	0.9791666666666666
comp20271_g1_i1	246	0.25203252032520324	(GACAATT)n	Simple_repeat	59	[1-59]	0.9830508474576272
comp20275_g1_i1	384	0.1796875	Copia-39-I_ZM	LTR/Copia	4483	[105-177]	0.016060673656033905
comp20295_g1_i1	339	0.1710914454277286	(TAT)n	Simple_repeat	56	[1-56]	0.9821428571428571
comp202_g2_i2	328	0.32621951219512196	(TA)n	Simple_repeat	111	[1-111]	0.990990990990991
comp20305_g1_i1	933	0.09646302250803858	Mariner-N19_HSal/ClassII/TIR/Tc1-Mariner	Unspecified	1189	[658-746]	0.07401177460050462
comp20306_g1_i1	529	0.06805293005671077	(ATATAAC)n	Simple_repeat	36	[1-36]	0.9722222222222222
comp2031_g1_i2	902	0.08536585365853659	Kolobok-N1_AEc/ClassII/?/Kolobok	Unspecified	8251	[4688-4757]	0.008362622712398498
comp2031_g1_i3	1082	0.0711645101663586	Kolobok-N1_AEc/ClassII/?/Kolobok	Unspecified	8251	[4688-4757]	0.008362622712398498
comp20325_g1_i1	445	0.22696629213483147	SMAR25B/ClassII/TIR/Tc1-Mariner	Unspecified	2662	[2523-2623]	0.037565740045078885
comp20327_g1_i1	373	0.0777479892761394	(CTTAAT)n	Simple_repeat	29	[1-29]	0.9655172413793104
comp20330_g1_i1	754	0.0649867374005305	(TGTAT)n	Simple_repeat	51	[1-51]	0.9803921568627451
comp20335_g1_i1	289	0.17301038062283736	(ATGTATT)n	Simple_repeat	50	[1-50]	0.98
comp2033_g1_i1	220	0.45	Mariner-1_SIn/ClassII/TIR/Tc1-Mariner	Unspecified	2950	[162-263]	0.03423728813559322
comp20342_g1_i1	264	0.9810606060606061	Gypsy-4_PBa-I	LTR/Gypsy	8233	[3434-3663]	0.02781489129114539
comp20346_g1_i1	543	0.06629834254143646	(AGCG)n	Simple_repeat	36	[1-36]	0.9722222222222222
comp2034_g1_i1	355	0.3154929577464789	Chapaev3-5_HM/ClassII/?/Chapaev	Unspecified	2555	[29-140]	0.04344422700587084
comp20358_g1_i1	348	0.20114942528735633	A-rich	Low_complexity	70	[1-70]	0.9857142857142858
comp20359_g1_i1	245	0.20408163265306123	piggyBac-5_PR/ClassII/TIR/PiggyBac	Unspecified	4773	[1530-1582]	0.010894615545778337
comp2035_g1_i1	674	0.12166172106824925	R1-1_HSal	LINE/I	5095	[4968-5052]	0.01648675171736997
comp2035_g1_i2	693	0.2958152958152958	R1-1_SIn	LINE/I	5091	[145-350]	0.04026713808681988
comp20367_g1_i1	458	0.04585152838427948	(TC)n	Simple_repeat	22	[1-22]	0.9545454545454546
comp20370_g1_i1	221	0.334841628959276	BEL-284_AA-I	LTR/Bel-Pao	6887	[1624-1695]	0.010309278350515464
comp20376_g1_i1	424	0.08490566037735849	A-rich	Low_complexity	37	[1-37]	0.972972972972973
comp20385_g1_i1	287	0.1602787456445993	A-rich	Low_complexity	42	[1-42]	0.9761904761904762
comp20398_g1_i1	276	0.19202898550724637	IS3EU-3_DR/ClassII/?/?	Unspecified	9686	[2738-2791]	0.005471814990708239
comp20406_g1_i1	226	0.18584070796460178	Kolobok-N1_AEc/ClassII/?/Kolobok	Unspecified	8251	[4715-4757]	0.005090292085807781
comp2040_g1_i1	545	0.09174311926605505	piggyBac-10_SM/ClassII/TIR/PiggyBac	Unspecified	2648	[2589-2639]	0.0188821752265861
comp20420_g1_i1	415	0.11325301204819277	A-rich	Low_complexity	45	[1-45]	0.9777777777777777
comp20423_g1_i1	279	0.12903225806451613	(ATA)n	Simple_repeat	36	[1-36]	0.9722222222222222
comp2042_g1_i1	370	0.12972972972972974	Mariner-90_HSal/ClassII/TIR/Tc1-Mariner	Unspecified	1451	[38-84]	0.03170227429359063
comp2043_g2_i1	314	0.12420382165605096	(TACGAT)n	Simple_repeat	38	[1-38]	0.9736842105263158
comp2043_g2_i2	335	0.11641791044776119	(TACGAT)n	Simple_repeat	38	[1-38]	0.9736842105263158
comp20449_g1_i1	281	0.7117437722419929	Mariner-6_HSal/ClassII/TIR/Tc1-Mariner	Unspecified	1299	[237-436]	0.15319476520400307
comp20458_g1_i1	550	0.13454545454545455	(TA)n	Simple_repeat	80	[1-80]	0.9875
comp20461_g1_i1	400	0.28	(ATATT)n	Simple_repeat	119	[1-119]	0.9915966386554622
comp20461_g1_i2	401	0.38154613466334164	(TAATA)n	Simple_repeat	152	[1-152]	0.993421052631579
comp20466_g1_i1	494	0.06072874493927125	(AG)n	Simple_repeat	31	[1-31]	0.967741935483871
comp20467_g1_i1	351	0.07977207977207977	Gypsy-3_AEc-I	LTR/Gypsy	5121	[17-44]	0.005272407732864675
comp2046_g1_i1	533	0.18761726078799248	SART-1_CF	LINE/I	6969	[2490-2584]	0.013488305352274358
comp20473_g2_i1	415	0.04819277108433735	(AC)n	Simple_repeat	21	[1-21]	0.9523809523809523
comp20477_g1_i1	460	0.1956521739130435	Copia-52_SB-I	LTR/Copia	4453	[3256-3332]	0.017067145744441948
comp2047_g1_i1	397	0.09571788413098237	A-rich	Low_complexity	40	[1-40]	0.975
comp20480_g1_i1	304	0.2993421052631579	Gypsy-9_DPu-I	LTR/Gypsy	5282	[803-895]	0.01741764483150322
comp20487_g1_i1	339	0.17404129793510326	(AGGA)n	Simple_repeat	61	[1-61]	0.9836065573770492
comp20490_g1_i1	397	0.7279596977329975	Gypsy-19_PBa-I	LTR/Gypsy	7521	[2845-3139]	0.03909054646988432
comp20491_g1_i1	588	0.10204081632653061	Gypsy-21_LBS-I	LTR/Gypsy	9004	[6735-6795]	0.006663705019991115
comp20493_g1_i1	293	0.09897610921501707	(TACGT)n	Simple_repeat	29	[1-29]	0.9655172413793104
comp20495_g1_i1	388	0.16237113402061856	Kolobok-2_XT/ClassII/?/Kolobok	Unspecified	7775	[4124-4186]	0.00797427652733119
comp204_g1_i1	258	0.20930232558139536	piggyBac-N1_DWil/ClassII/TIR/PiggyBac	Unspecified	658	[1-53]	0.0790273556231003
comp20500_g1_i1	414	0.26570048309178745	Mariner-11_AEc/ClassII/TIR/Tc1-Mariner	Unspecified	2034	[1-110]	0.0535889872173058
comp20501_g1_i1	671	0.06706408345752608	(TCGGCGA)n	Simple_repeat	45	[1-45]	0.9777777777777777
comp20503_g1_i1	289	0.2664359861591695	EnSpm1_SB/ClassII/TIR/CACTA	Unspecified	14710	[9732-9783]	0.003467029231815092
comp20508_g1_i1	408	0.09803921568627451	(ATTTA)n	Simple_repeat	41	[1-41]	0.975609756097561
comp20515_g1_i1	595	0.043697478991596636	(TC)n	Simple_repeat	27	[1-27]	0.9629629629629629
comp20525_g1_i1	490	0.08163265306122448	(ATATTA)n	Simple_repeat	42	[1-42]	0.9761904761904762
comp20533_g1_i1	454	0.22246696035242292	Merlin-1N1_PBa/ClassII/TIR/Merlin	Unspecified	3967	[981-1081]	0.025207965717166624
comp20541_g1_i1	355	0.07887323943661972	GA-rich	Low_complexity	30	[1-30]	0.9666666666666667
comp20552_g1_i1	313	0.09904153354632587	Gypsy-16_LVa	LTR/Gypsy	5387	[4241-4272]	0.005754594393911268
comp20554_g1_i1	314	0.09872611464968153	(TTGT)n	Simple_repeat	30	[1-30]	0.9666666666666667
comp20557_g1_i1	562	0.09074733096085409	(TATAT)n	Simple_repeat	55	[1-55]	0.9818181818181818
comp20559_g1_i1	280	0.1	(AAT)n	Simple_repeat	30	[1-30]	0.9666666666666667
comp20573_g1_i1	367	0.2670299727520436	(TATTAT)n	Simple_repeat	98	[1-98]	0.9897959183673469
comp20594_g1_i1	478	0.08577405857740586	(TTCGAT)n	Simple_repeat	41	[1-41]	0.975609756097561
comp20601_g1_i1	264	0.09090909090909091	(CG)n	Simple_repeat	25	[1-25]	0.96
comp20620_g1_i1	526	0.09505703422053231	(TACTAAG)n	Simple_repeat	51	[1-51]	0.9803921568627451
comp20622_g1_i1	378	0.10052910052910052	Gypsy-34_DEl-I	LTR/Gypsy	4724	[2414-2451]	0.007832345469940728
comp20646_g1_i1	326	0.1165644171779141	(CT)n	Simple_repeat	40	[1-40]	0.975
comp20649_g1_i1	476	0.12605042016806722	Harbinger-1_BF/ClassII/TIR/PIF-Harbinger	Unspecified	4812	[3758-3814]	0.011637572734829594
comp20650_g1_i1	255	0.3254901960784314	(ATC)n	Simple_repeat	84	[1-84]	0.9880952380952381
comp20655_g1_i1	561	0.049910873440285206	A-rich	Low_complexity	29	[1-29]	0.9655172413793104
comp20656_g1_i1	459	0.06100217864923747	(TC)n	Simple_repeat	30	[1-30]	0.9666666666666667
comp20659_g1_i1	501	0.07584830339321358	(AGCG)n	Simple_repeat	39	[1-39]	0.9743589743589743
comp20675_g1_i1	298	0.19463087248322147	(ATATT)n	Simple_repeat	56	[1-56]	0.9821428571428571
comp2067_g2_i1	469	0.22174840085287847	(AATAGAA)n	Simple_repeat	114	[1-114]	0.9912280701754386
comp20691_g1_i1	286	0.15384615384615385	(G)n	Simple_repeat	45	[1-45]	0.9777777777777777
comp20692_g1_i1	284	0.10915492957746478	(TTCA)n	Simple_repeat	34	[1-34]	0.9705882352941176
comp20695_g2_i1	233	0.06866952789699571	(AT)n	Simple_repeat	17	[1-17]	0.9411764705882353
comp20700_g1_i1	729	0.07270233196159122	(TAATAT)n	Simple_repeat	53	[1-53]	0.9811320754716981
comp20724_g1_i1	366	0.1366120218579235	EnSpm-1_HV/ClassII/TIR/CACTA	Unspecified	11744	[10536-10587]	0.004342643051771117
comp20725_g1_i1	505	0.14653465346534653	CryptonV-3_DR/ClassII/Crypton/Crypton	Unspecified	23453	[384-451]	0.002856777384556347
comp2072_g1_i1	385	0.07532467532467532	(ATATT)n	Simple_repeat	30	[1-30]	0.9666666666666667
comp20731_g1_i1	437	0.06407322654462243	GA-rich	Low_complexity	30	[1-30]	0.9666666666666667
comp20734_g1_i1	234	0.09829059829059829	(TC)n	Simple_repeat	24	[1-24]	0.9583333333333334
comp2073_g1_i1	394	0.14720812182741116	hAT-7_SSa/ClassII/TIR/hAT	Unspecified	2471	[1345-1405]	0.024281667341157425
comp2073_g1_i2	475	0.12210526315789473	hAT-7_SSa/ClassII/TIR/hAT	Unspecified	2471	[1345-1405]	0.024281667341157425
comp2073_g2_i1	385	0.509090909090909	R5-1_SM	LINE/R2	5465	[4808-4992]	0.033668801463860934
comp20749_g1_i1	995	0.0964824120603015	Gypsy-18_PBa-I	LTR/Gypsy	10772	[10289-10392]	0.009561826958782027
comp20751_g1_i1	590	0.13050847457627118	(ATAATAA)n	Simple_repeat	78	[1-78]	0.9871794871794872
comp20757_g1_i1	237	0.14345991561181434	A-rich	Low_complexity	35	[1-35]	0.9714285714285714
comp20759_g1_i1	414	0.13043478260869565	GA-rich	Low_complexity	55	[1-55]	0.9818181818181818
comp20763_g1_i1	278	0.07553956834532374	(GA)n	Simple_repeat	22	[1-22]	0.9545454545454546
comp2076_g1_i1	406	0.0812807881773399	Copia-23_NVi-I	LTR/Copia	6872	[1-34]	0.00480209545983702
comp2076_g2_i1	294	0.11224489795918367	Copia-23_NVi-I	LTR/Copia	6872	[1-34]	0.00480209545983702
comp20770_g1_i1	263	0.23954372623574144	A-rich	Low_complexity	61	[1-61]	0.9836065573770492
comp20777_g1_i1	487	0.08213552361396304	(ATATTTC)n	Simple_repeat	43	[1-43]	0.9767441860465116
comp20778_g1_i1	681	0.07048458149779736	hAT-N4_ALy/ClassII/TIR/hAT	Unspecified	1146	[674-724]	0.04363001745200698
comp20813_g1_i1	247	0.11740890688259109	(TTC)n	Simple_repeat	29	[1-29]	0.9655172413793104
comp20818_g1_i1	203	0.4187192118226601	(ATT)n	Simple_repeat	82	[1-82]	0.9878048780487805
comp20819_g1_i1	508	0.1141732283464567	Copia-84B_CCri-I	LTR/Copia	5245	[2020-2082]	0.011820781696854146
comp20823_g1_i1	417	0.1079136690647482	Mariner-N4_ACe/ClassII/TIR/Tc1-Mariner	Unspecified	1644	[933-978]	0.02737226277372263
comp20824_g1_i1	285	0.29473684210526313	Gypsy-23_AA-I	LTR/Gypsy	4344	[3718-3807]	0.020488029465930018
comp20831_g1_i1	468	0.2264957264957265	(TTAA)n	Simple_repeat	107	[1-107]	0.9906542056074766
comp20837_g1_i1	392	0.1836734693877551	Merlin-N5_HSal/ClassII/TIR/Merlin	Unspecified	981	[904-971]	0.06829765545361875
comp20845_g1_i1	869	0.04372842347525892	(TATTGT)n	Simple_repeat	37	[1-37]	0.972972972972973
comp20857_g1_i1	258	0.20155038759689922	A-rich	Low_complexity	52	[1-52]	0.9807692307692307
comp2085_g2_i1	284	0.12323943661971831	(TAT)n	Simple_repeat	37	[1-37]	0.972972972972973
comp20863_g1_i1	680	0.07941176470588235	(ATAA)n	Simple_repeat	50	[1-50]	0.98
comp20864_g1_i1	292	0.0821917808219178	(TAA)n	Simple_repeat	26	[1-26]	0.9615384615384616
comp20872_g1_i1	264	0.14772727272727273	(GGC)n	Simple_repeat	39	[1-39]	0.9743589743589743
comp20881_g1_i1	262	0.15648854961832062	(GAAC)n	Simple_repeat	41	[1-41]	0.975609756097561
comp20889_g1_i1	497	0.028169014084507043	(CTTTCT)n	Simple_repeat	52	[1-25]	0.46153846153846156
comp2088_g1_i1	261	0.09578544061302682	(AATA)n	Simple_repeat	26	[1-26]	0.9615384615384616
comp20892_g1_i1	271	0.0996309963099631	(ATCCG)n	Simple_repeat	27	[1-27]	0.9629629629629629
comp2089_g1_i1	357	0.40896358543417366	(TTTA)n	Simple_repeat	145	[1-145]	0.993103448275862
comp2089_g1_i2	311	0.4694533762057878	(TTTA)n	Simple_repeat	145	[1-145]	0.993103448275862
comp20914_g1_i1	315	0.23492063492063492	DNA35_Lch/ClassII/TIR/Tc1-Mariner	Unspecified	1136	[2-77]	0.06602112676056338
comp20918_g1_i1	426	0.13380281690140844	Mariner-13_AEc/ClassII/TIR/Tc1-Mariner	Unspecified	1300	[1-58]	0.04384615384615385
comp20929_g1_i1	291	0.14776632302405499	(AATAATA)n	Simple_repeat	44	[1-44]	0.9772727272727273
comp2092_g3_i1	249	0.08835341365461848	(CGC)n	Simple_repeat	23	[1-23]	0.9565217391304348
comp20930_g1_i1	404	0.1707920792079208	Polinton-2_HM/ClassII/Maverick/Maverick	Unspecified	42550	[22326-22394]	0.0015981198589894241
comp20931_g1_i1	228	0.5833333333333334	(TTCAATA)n	Simple_repeat	141	[1-141]	0.9929078014184397
comp20950_g1_i1	440	0.1159090909090909	A-rich	Low_complexity	51	[1-51]	0.9803921568627451
comp20959_g1_i1	542	0.23247232472324722	Gypsy1-I_Dmoj	LTR/Gypsy	7444	[1344-1466]	0.016389038151531435
comp20962_g1_i1	378	0.08994708994708994	A-rich	Low_complexity	38	[1-38]	0.9736842105263158
comp20966_g1_i1	444	0.15990990990990991	piggyBac-1_BM/ClassII/TIR/PiggyBac	Unspecified	2467	[2396-2466]	0.02837454398054317
comp20969_g1_i1	363	0.42699724517906334	Mariner-31_SM/ClassII/TIR/Tc1-Mariner	Unspecified	2296	[475-632]	0.06837979094076654
comp2096_g1_i1	343	0.46647230320699706	U1	?/?	806	[432-593]	0.19975186104218362
comp2096_g1_i2	519	0.30828516377649323	U1	?/?	806	[432-593]	0.19975186104218362
comp2096_g1_i3	380	0.42105263157894735	U1	?/?	806	[432-593]	0.19975186104218362
comp20979_g1_i1	558	0.07526881720430108	(CGCGT)n	Simple_repeat	43	[1-43]	0.9767441860465116
comp20982_g1_i1	276	0.2318840579710145	EnSpm-16_HM/ClassII/TIR/CACTA	Unspecified	6763	[5423-5482]	0.008723939080289813
comp2098_g1_i1	227	0.15418502202643172	U2	?/?	896	[557-591]	0.03794642857142857
comp20998_g1_i1	309	0.11003236245954692	A-rich	Low_complexity	34	[1-34]	0.9705882352941176
comp21003_g1_i1	201	0.3681592039800995	(AATA)n	Simple_repeat	74	[1-74]	0.9864864864864865
comp21010_g1_i1	378	0.06878306878306878	A-rich	Low_complexity	27	[1-27]	0.9629629629629629
comp21017_g1_i1	393	0.09923664122137404	(CT)n	Simple_repeat	40	[1-40]	0.975
comp21028_g1_i1	723	0.0636237897648686	(CTCTC)n	Simple_repeat	46	[1-46]	0.9782608695652174
comp21045_g1_i1	359	0.17548746518105848	(TATAA)n	Simple_repeat	64	[1-64]	0.984375
comp21049_g1_i1	301	0.24584717607973422	(TA)n	Simple_repeat	75	[1-75]	0.9866666666666667
comp2104_g1_i1	360	0.10833333333333334	(TTG)n	Simple_repeat	41	[1-41]	0.975609756097561
comp2104_g2_i1	389	0.12853470437017994	(TAGT)n	Simple_repeat	54	[1-54]	0.9814814814814815
comp21058_g1_i1	389	0.13624678663239073	(ATTT)n	Simple_repeat	56	[1-56]	0.9821428571428571
comp2105_g1_i1	327	0.12844036697247707	piggyBac-N1_HSal/ClassII/TIR/PiggyBac	Unspecified	745	[703-745]	0.056375838926174496
comp21060_g1_i1	711	0.07032348804500703	Mariner-16_SIn/ClassII/TIR/Tc1-Mariner	Unspecified	2597	[561-608]	0.01809780515979977
comp2106_g1_i1	221	0.7330316742081447	Mariner-38_SIn/ClassII/TIR/Tc1-Mariner	Unspecified	2024	[93-272]	0.08843873517786562
comp21080_g1_i1	260	0.17692307692307693	IAP5-Mm_I-int	LTR/ERV	7747	[1015-1059]	0.0056796179166128825
comp21110_g1_i1	477	0.07756813417190776	R1-11_DWi	LINE/I	4284	[814-851]	0.008636788048552755
comp21116_g1_i1	404	0.22772277227722773	hATm-50_HM/ClassII/TIR/hAT	Unspecified	3721	[2253-2346]	0.0249932813759742
comp21118_g1_i1	285	0.11578947368421053	(CCTCCC)n	Simple_repeat	33	[1-33]	0.9696969696969697
comp21122_g1_i1	524	0.14694656488549618	MER30_	3/ClassII/TIR/hAT	230	[5-84]	0.34347826086956523
comp21165_g1_i1	277	0.11191335740072202	(GATGCG)n	Simple_repeat	31	[1-31]	0.967741935483871
comp21175_g1_i1	279	0.2867383512544803	EnSpm-7_HM/ClassII/TIR/CACTA	Unspecified	7439	[2543-2618]	0.010082000268853341
comp21177_g1_i1	688	0.23255813953488372	L2-12_CTe	LINE/Jockey	1749	[1594-1745]	0.08633504859919955
comp21178_g1_i1	250	0.148	(ATTTA)n	Simple_repeat	36	[1-36]	0.9722222222222222
comp21188_g1_i1	1046	0.04780114722753346	(ACGG)n	Simple_repeat	51	[1-51]	0.9803921568627451
comp21195_g1_i1	549	0.07832422586520947	(AT)n	Simple_repeat	47	[1-47]	0.9787234042553191
comp21198_g1_i1	415	0.15421686746987953	GA-rich	Low_complexity	64	[1-64]	0.984375
comp21201_g1_i1	254	0.19291338582677164	hAT-2_XT/ClassII/TIR/hAT	Unspecified	2794	[102-156]	0.019327129563350035
comp21203_g1_i1	386	0.16321243523316062	L1-N1_FV	LINE/L1	1918	[285-344]	0.030761209593326382
comp21217_g1_i1	461	0.049891540130151846	(AT)n	Simple_repeat	25	[1-25]	0.96
comp21222_g1_i1	490	0.10204081632653061	(TATATACA)n	Simple_repeat	54	[1-54]	0.9814814814814815
comp21223_g1_i1	465	0.09032258064516129	Gypsy-3_PMar-I	LTR/Gypsy	5475	[1215-1260]	0.00821917808219178
comp21234_g1_i1	358	0.15083798882681565	Merlin-1N1_PBa/ClassII/TIR/Merlin	Unspecified	1218	[986-1040]	0.04433497536945813
comp21243_g1_i1	250	0.128	(ATAA)n	Simple_repeat	33	[1-33]	0.9696969696969697
comp21246_g1_i1	453	0.39072847682119205	GA-rich	Low_complexity	166	[1-166]	0.9939759036144579
comp21251_g1_i1	440	0.18181818181818182	R1-2_DK	LINE/I	3679	[2174-2215]	0.011144332699103017
comp21261_g1_i1	568	0.0721830985915493	Neptune3_Ren	PLE/Penelope	3664	[1236-1280]	0.012008733624454149
comp21270_g1_i1	477	0.09014675052410902	(AGAATT)n	Simple_repeat	49	[1-49]	0.9795918367346939
comp21283_g1_i1	293	0.3447098976109215	Helitron-5_NVi/ClassII/Helitron/Helitron	Unspecified	5915	[1033-1129]	0.016229923922231614
comp21290_g1_i1	528	0.26515151515151514	Mariner-19_HSal/ClassII/TIR/Tc1-Mariner	Unspecified	2055	[53-193]	0.0681265206812652
comp21300_g1_i1	271	0.14022140221402213	(CAA)n	Simple_repeat	37	[1-37]	0.972972972972973
comp21304_g1_i1	316	0.13291139240506328	(TTA)n	Simple_repeat	43	[1-43]	0.9767441860465116
comp21305_g1_i1	306	0.19607843137254902	(ATTGTT)n	Simple_repeat	62	[1-62]	0.9838709677419355
comp21316_g1_i1	296	0.9763513513513513	Mariner-5_ACe/ClassII/TIR/Tc1-Mariner	Unspecified	1286	[917-1232]	0.24494556765163297
comp21319_g1_i1	237	0.1940928270042194	(AATAT)n	Simple_repeat	47	[1-47]	0.9787234042553191
comp21320_g1_i1	392	0.11989795918367346	(CGA)n	Simple_repeat	48	[1-48]	0.9791666666666666
comp21321_g1_i1	461	0.23210412147505424	Merlin-N5_HSal/ClassII/TIR/Merlin	Unspecified	1218	[903-1033]	0.10673234811165845
comp2132_g1_i1	235	0.4127659574468085	(TAATATA)n	Simple_repeat	99	[1-99]	0.98989898989899
comp21334_g1_i1	386	0.11139896373056994	(ATTAA)n	Simple_repeat	43	[1-43]	0.9767441860465116
comp21338_g1_i1	453	0.05077262693156733	(TTA)n	Simple_repeat	23	[1-23]	0.9565217391304348
comp21339_g1_i1	510	0.11764705882352941	(TTATT)n	Simple_repeat	55	[1-55]	0.9818181818181818
comp21343_g1_i1	316	0.09177215189873418	(CGC)n	Simple_repeat	30	[1-30]	0.9666666666666667
comp21358_g1_i1	258	0.08139534883720931	(T)n	Simple_repeat	22	[1-22]	0.9545454545454546
comp2135_g1_i1	700	0.9971428571428571	GYPSY-I_MT	LTR/Gypsy	11810	[6029-6724]	0.05884843353090601
comp21361_g1_i1	697	0.06743185078909612	GA-rich	Low_complexity	49	[1-49]	0.9795918367346939
comp21374_g1_i1	277	0.1407942238267148	A-rich	Low_complexity	41	[1-41]	0.975609756097561
comp21378_g1_i1	847	0.04604486422668241	npiggy1_Mm/ClassII/TIR/PiggyBac	Unspecified	240	[1-39]	0.15833333333333333
comp21382_g1_i1	329	0.13069908814589665	(TTTA)n	Simple_repeat	46	[1-46]	0.9782608695652174
comp21387_g1_i1	283	0.07773851590106007	(GA)n	Simple_repeat	23	[1-23]	0.9565217391304348
comp21399_g1_i1	928	0.06465517241379311	(TGC)n	Simple_repeat	62	[1-62]	0.9838709677419355
comp21411_g1_i1	422	0.31516587677725116	Daphne-18_HM	LINE/Jockey	5211	[4292-4479]	0.03588562655920169
comp21412_g1_i1	241	0.08713692946058091	(AG)n	Simple_repeat	22	[1-22]	0.9545454545454546
comp21415_g1_i1	231	0.26406926406926406	piggyBac-N1_DWil/ClassII/TIR/PiggyBac	Unspecified	658	[1-60]	0.08966565349544073
comp21427_g1_i1	222	0.18018018018018017	(AGAAGAG)n	Simple_repeat	42	[1-42]	0.9761904761904762
comp21436_g1_i1	254	0.18503937007874016	A-rich	Low_complexity	50	[1-50]	0.98
comp21437_g1_i1	306	0.16339869281045752	(TA)n	Simple_repeat	53	[1-53]	0.9811320754716981
comp21443_g1_i1	273	0.1391941391941392	G-rich	Low_complexity	40	[1-40]	0.975
comp21451_g2_i1	205	0.24390243902439024	(CT)n	Simple_repeat	52	[1-52]	0.9807692307692307
comp21466_g1_i1	742	0.04582210242587601	(AT)n	Simple_repeat	36	[1-36]	0.9722222222222222
comp21489_g1_i1	550	0.04727272727272727	(TCATC)n	Simple_repeat	27	[1-27]	0.9629629629629629
comp214_g1_i1	372	0.16129032258064516	A-rich	Low_complexity	61	[1-61]	0.9836065573770492
comp21501_g1_i1	301	0.0664451827242525	(GA)n	Simple_repeat	21	[1-21]	0.9523809523809523
comp21505_g1_i1	213	0.1267605633802817	Transib-5_DRh/ClassII/TIR/Transib	Unspecified	1443	[1-28]	0.018711018711018712
comp21513_g1_i1	326	0.26380368098159507	Mariner-26_SIn/ClassII/TIR/Tc1-Mariner	Unspecified	1266	[1173-1265]	0.07266982622432859
comp21517_g1_i1	262	0.16030534351145037	(CTCTCT)n	Simple_repeat	90	[1-90]	0.9888888888888889
comp21526_g1_i1	579	0.0690846286701209	(TATATACA)n	Simple_repeat	40	[1-40]	0.975
comp2154_g1_i1	529	0.9905482041587902	Gypsy-18_SI-I	LTR/Gypsy	4220	[2210-3004]	0.1881516587677725
comp21552_g1_i1	258	0.16666666666666666	Penelope-6_LMi	PLE/Penelope	2381	[22-66]	0.018479630407391853
comp21558_g1_i1	443	0.10835214446952596	(TTAGATT)n	Simple_repeat	51	[1-51]	0.9803921568627451
comp21561_g1_i1	339	0.1710914454277286	ERVB2_1-I_MM	LTR/Retrovirus	6979	[34-92]	0.008310646224387448
comp21580_g1_i1	606	0.13861386138613863	(ATTTTT)n	Simple_repeat	79	[1-79]	0.9873417721518988
comp21592_g1_i1	330	0.16363636363636364	(TTAT)n	Simple_repeat	55	[1-55]	0.9818181818181818
comp21597_g1_i1	457	0.10722100656455143	(ATATA)n	Simple_repeat	49	[1-49]	0.9795918367346939
comp21605_g1_i1	412	0.08737864077669903	A-rich	Low_complexity	37	[1-37]	0.972972972972973
comp2160_g1_i1	411	0.1192214111922141	(ATA)n	Simple_repeat	51	[1-51]	0.9803921568627451
comp21611_g1_i1	582	0.07388316151202749	(AATAA)n	Simple_repeat	42	[1-42]	0.9761904761904762
comp21612_g1_i1	279	0.10752688172043011	(ATTTC)n	Simple_repeat	30	[1-30]	0.9666666666666667
comp21615_g1_i1	547	0.113345521023766	(CGG)n	Simple_repeat	64	[1-64]	0.984375
comp2161_g1_i1	350	0.18857142857142858	A-rich	Low_complexity	70	[1-70]	0.9857142857142858
comp21622_g1_i1	217	0.14285714285714285	A-rich	Low_complexity	33	[1-33]	0.9696969696969697
comp21627_g1_i1	784	0.09693877551020408	ENSPM-6_DR/ClassII/TIR/CACTA	Unspecified	32616	[13909-13980]	0.0021768457198920775
comp21648_g1_i1	588	0.07482993197278912	(ATAA)n	Simple_repeat	44	[1-44]	0.9772727272727273
comp2164_g1_i1	359	0.26740947075208915	EnSpm-9_DR/ClassII/TIR/CACTA	Unspecified	8620	[980-1062]	0.009512761020881671
comp21686_g1_i1	432	0.3449074074074074	IS3EU-1_DR/ClassII/?/?	Unspecified	8704	[6588-6716]	0.014705882352941176
comp21694_g1_i1	480	0.13333333333333333	(ATTTTT)n	Simple_repeat	62	[1-62]	0.9838709677419355
comp21696_g1_i1	324	0.14814814814814814	(ATTATTA)n	Simple_repeat	48	[1-48]	0.9791666666666666
comp21698_g1_i1	550	0.10909090909090909	G-rich	Low_complexity	61	[1-61]	0.9836065573770492
comp21699_g1_i1	292	0.1404109589041096	RTE-18_CPB	LINE/RTE	3047	[1599-1640]	0.013455858221201182
comp21706_g1_i1	390	0.08717948717948718	(ATTATA)n	Simple_repeat	35	[1-35]	0.9714285714285714
comp21716_g1_i1	308	0.11688311688311688	(ACATATT)n	Simple_repeat	40	[1-40]	0.975
comp21722_g1_i1	313	0.07987220447284345	(ATAA)n	Simple_repeat	25	[1-25]	0.96
comp21738_g1_i1	416	0.08173076923076923	piggyBac-1_EL/ClassII/TIR/PiggyBac	Unspecified	4622	[1069-1101]	0.006923409779316313
comp21745_g1_i1	507	0.14990138067061143	Gypsy2-I_DM	LTR/Gypsy	6545	[2987-3065]	0.011917494270435447
comp21748_g1_i1	722	0.09556786703601108	A-rich	Low_complexity	70	[1-70]	0.9857142857142858
comp21758_g1_i1	882	0.3219954648526077	hAT-26_SM/ClassII/TIR/hAT	Unspecified	3040	[1609-1892]	0.09309210526315789
comp21759_g1_i1	455	0.5296703296703297	Mariner-3_AAe/ClassII/TIR/Tc1-Mariner	Unspecified	1589	[754-996]	0.15229704216488357
comp21766_g1_i1	253	0.2490118577075099	RMER12	LTR/ERV	1322	[803-869]	0.049924357034795766
comp21778_g1_i1	551	0.6297640653357531	Mariner-89_HSal/ClassII/TIR/Tc1-Mariner	Unspecified	1605	[775-1124]	0.21744548286604362
comp21783_g1_i1	1192	0.050335570469798654	(AATT)n	Simple_repeat	58	[1-58]	0.9827586206896551
comp21787_g1_i1	387	0.06718346253229975	(ATA)n	Simple_repeat	27	[1-27]	0.9629629629629629
comp21791_g1_i1	470	0.12340425531914893	Copia-130_CCri-LTR	LTR/Copia	399	[335-395]	0.15037593984962405
comp21802_g1_i1	211	0.27488151658767773	(TTTCAT)n	Simple_repeat	61	[1-61]	0.9836065573770492
comp21802_g2_i1	435	0.07816091954022988	(T)n	Simple_repeat	35	[1-35]	0.9714285714285714
comp21810_g1_i1	288	0.14930555555555555	(TATAT)n	Simple_repeat	41	[1-41]	0.975609756097561
comp21828_g1_i1	295	0.08135593220338982	(CCGG)n	Simple_repeat	25	[1-25]	0.96
comp21838_g1_i1	275	0.15636363636363637	HARB-2_SBi/ClassII/TIR/PIF-Harbinger	Unspecified	5541	[1345-1388]	0.007760332070023462
comp21839_g1_i1	596	0.07885906040268456	(TTA)n	Simple_repeat	47	[1-47]	0.9787234042553191
comp21843_g1_i1	448	0.16741071428571427	(TAT)n	Simple_repeat	77	[1-77]	0.987012987012987
comp21848_g1_i1	720	0.09583333333333334	(TC)n	Simple_repeat	74	[1-74]	0.9864864864864865
comp2184_g1_i1	467	0.15631691648822268	Gypsy-14_DAn-I	LTR/Gypsy	6105	[14-87]	0.011957411957411958
comp2184_g1_i2	289	0.25259515570934254	Gypsy-14_DAn-I	LTR/Gypsy	6105	[14-87]	0.011957411957411958
comp21856_g1_i1	396	0.08333333333333333	(TATATG)n	Simple_repeat	35	[1-35]	0.9714285714285714
comp21857_g1_i1	314	0.1337579617834395	(CCTCTGT)n	Simple_repeat	43	[1-43]	0.9767441860465116
comp21911_g1_i1	416	0.2283653846153846	Mariner-74_HSal/ClassII/TIR/Tc1-Mariner	Unspecified	1295	[1194-1289]	0.07335907335907337
comp21914_g1_i1	297	0.18181818181818182	(AATTAT)n	Simple_repeat	55	[1-55]	0.9818181818181818
comp2191_g1_i1	283	0.24734982332155478	(TAA)n	Simple_repeat	71	[1-71]	0.9859154929577465
comp21922_g1_i1	208	0.44711538461538464	(CTC)n	Simple_repeat	94	[1-94]	0.9893617021276596
comp2192_g1_i1	822	0.027980535279805353	(T)n	Simple_repeat	24	[1-24]	0.9583333333333334
comp21952_g1_i1	666	0.16816816816816818	(TCTT)n	Simple_repeat	115	[1-115]	0.991304347826087
comp21955_g1_i1	642	0.03582554517133956	(AGTA)n	Simple_repeat	24	[1-24]	0.9583333333333334
comp2195_g1_i1	250	0.272	Vingi-2_PM	LINE/?	3107	[1932-2000]	0.02188606372706791
comp2195_g1_i2	1365	0.12673992673992673	Ag-Jen-1	LINE/Jockey	4799	[2670-3019]	0.072723484059179
comp21960_g1_i1	259	0.16216216216216217	Transib-6_HM/ClassII/TIR/Transib	Unspecified	3706	[840-882]	0.011332973556395036
comp21964_g1_i1	698	0.15329512893982808	Ginger1-1_HM/ClassII/?/Ginger1	Unspecified	3425	[2623-2733]	0.032116788321167884
comp21967_g1_i1	250	0.164	(ATTATTT)n	Simple_repeat	42	[1-42]	0.9761904761904762
comp21975_g1_i1	301	0.16943521594684385	Gypsy-189_AA-I	LTR/Gypsy	5735	[1183-1232]	0.008544027898866609
comp22002_g1_i1	456	0.10526315789473684	(ATTTC)n	Simple_repeat	49	[1-49]	0.9795918367346939
comp22008_g1_i1	386	0.12694300518134716	GA-rich	Low_complexity	52	[1-52]	0.9807692307692307
comp22014_g1_i1	274	0.10218978102189781	(ATATT)n	Simple_repeat	29	[1-29]	0.9655172413793104
comp22016_g1_i1	292	0.1815068493150685	(CT)n	Simple_repeat	58	[1-58]	0.9827586206896551
comp22020_g1_i1	286	0.3076923076923077	hAT-10_DR/ClassII/TIR/hAT	Unspecified	4480	[93-174]	0.018080357142857145
comp22025_g1_i1	299	0.20735785953177258	A-rich	Low_complexity	60	[1-60]	0.9833333333333333
comp2202_g1_i1	457	0.07221006564551423	(AATA)n	Simple_repeat	33	[1-33]	0.9696969696969697
comp22031_g1_i1	347	0.25936599423631124	GA-rich	Low_complexity	92	[1-92]	0.9891304347826086
comp22038_g1_i1	706	0.06373937677053824	(TTGAA)n	Simple_repeat	46	[1-46]	0.9782608695652174
comp2203_g1_i1	455	0.25934065934065936	5S_DM	SINE/5S	135	[1-118]	0.8666666666666667
comp2203_g2_i1	265	0.2981132075471698	5S_DM	SINE/5S	135	[3-82]	0.5851851851851851
comp22051_g1_i1	358	0.17597765363128492	(TATTT)n	Simple_repeat	60	[1-60]	0.9833333333333333
comp22057_g1_i1	378	0.13756613756613756	A-rich	Low_complexity	50	[1-50]	0.98
comp22058_g1_i1	324	0.07098765432098765	(TCCT)n	Simple_repeat	24	[1-24]	0.9583333333333334
comp22067_g1_i1	319	0.42946708463949845	(TAT)n	Simple_repeat	131	[1-131]	0.9923664122137404
comp22079_g1_i1	331	0.15709969788519637	A-rich	Low_complexity	52	[1-52]	0.9807692307692307
comp22084_g1_i1	280	0.08214285714285714	(GAA)n	Simple_repeat	24	[1-24]	0.9583333333333334
comp22091_g1_i1	292	0.06506849315068493	(TCC)n	Simple_repeat	20	[1-20]	0.95
comp22091_g2_i1	415	0.13734939759036144	(TCT)n	Simple_repeat	59	[1-59]	0.9830508474576272
comp22095_g1_i1	262	0.27099236641221375	A-rich	Low_complexity	74	[1-74]	0.9864864864864865
comp22097_g1_i1	269	0.13011152416356878	A-rich	Low_complexity	35	[1-35]	0.9714285714285714
comp22102_g1_i1	713	0.06872370266479663	(TGTAATG)n	Simple_repeat	50	[1-50]	0.98
comp22111_g1_i1	395	0.12151898734177215	(GGCT)n	Simple_repeat	49	[1-49]	0.9795918367346939
comp22115_g1_i1	312	0.15384615384615385	(CGCGC)n	Simple_repeat	50	[1-50]	0.98
comp22117_g1_i1	416	0.038461538461538464	(GC)n	Simple_repeat	17	[1-17]	0.9411764705882353
comp22118_g1_i1	544	0.22794117647058823	SMAR25B/ClassII/TIR/Tc1-Mariner	Unspecified	2662	[2521-2656]	0.050713749060856496
comp22122_g1_i1	504	0.07936507936507936	(TTTA)n	Simple_repeat	41	[1-41]	0.975609756097561
comp22123_g1_i1	261	0.3448275862068966	(ACAATT)n	Simple_repeat	90	[1-90]	0.9888888888888889
comp22126_g1_i1	214	0.10747663551401869	(ATAA)n	Simple_repeat	24	[1-24]	0.9583333333333334
comp2213_g1_i1	477	0.13417190775681342	A-rich	Low_complexity	65	[1-65]	0.9846153846153847
comp2213_g1_i2	391	0.1636828644501279	A-rich	Low_complexity	65	[1-65]	0.9846153846153847
comp22151_g1_i1	392	0.08673469387755102	A-rich	Low_complexity	32	[1-32]	0.96875
comp22162_g1_i1	260	0.1346153846153846	G-rich	Low_complexity	34	[1-34]	0.9705882352941176
comp22166_g1_i1	617	0.06320907617504051	(CCCGT)n	Simple_repeat	40	[1-40]	0.975
comp22173_g1_i1	277	0.776173285198556	Gypsy-24_DEl-I	LTR/Gypsy	6148	[2607-2816]	0.033994795055302535
comp22182_g1_i1	358	0.5195530726256983	Transib-10_HM/ClassII/TIR/Transib	Unspecified	3745	[724-1053]	0.08785046728971962
comp22185_g1_i1	608	0.09375	(AATG)n	Simple_repeat	63	[1-63]	0.9841269841269841
comp22188_g1_i1	267	0.0749063670411985	(AG)n	Simple_repeat	21	[1-21]	0.9523809523809523
comp2218_g1_i1	723	0.21161825726141079	Transib-5_DK/ClassII/TIR/Transib	Unspecified	1955	[1093-1183]	0.04603580562659847
comp22190_g1_i1	263	0.06844106463878327	(GA)n	Simple_repeat	19	[1-19]	0.9473684210526315
comp22194_g1_i1	455	0.07032967032967033	(TC)n	Simple_repeat	34	[1-34]	0.9705882352941176
comp22197_g1_i1	268	0.07835820895522388	(AG)n	Simple_repeat	22	[1-22]	0.9545454545454546
comp221_g1_i1	256	0.48046875	Mariner-27_SIn/ClassII/TIR/Tc1-Mariner	Unspecified	1273	[1105-1235]	0.1021209740769835
comp22200_g1_i1	298	0.1476510067114094	Sola2-1_DPu/ClassII/?/Sola	Unspecified	4114	[2375-2416]	0.009965969859017987
comp22201_g1_i1	446	0.19506726457399104	Mariner-N13_ACe/ClassII/TIR/Tc1-Mariner	Unspecified	531	[350-436]	0.16195856873822975
comp22216_g1_i1	475	0.06315789473684211	(GCC)n	Simple_repeat	31	[1-31]	0.967741935483871
comp2221_g2_i1	1475	0.03389830508474576	Copia-21_CQ-I	LTR/Copia	1888	[1026-1077]	0.02701271186440678
comp22238_g1_i1	302	0.24834437086092714	I-6_AAe	LINE/I	5822	[5112-5194]	0.014084507042253521
comp22241_g1_i1	308	0.21103896103896103	(AATT)n	Simple_repeat	66	[1-66]	0.9848484848484849
comp22243_g1_i1	510	0.09411764705882353	(TATTTAA)n	Simple_repeat	49	[1-49]	0.9795918367346939
comp22244_g1_i1	268	0.15671641791044777	(CG)n	Simple_repeat	41	[1-41]	0.975609756097561
comp22255_g1_i1	426	0.45305164319248825	U_LTR_MT_	2	2966	[2261-2452]	0.06439649359406609
comp22256_g1_i1	285	0.21052631578947367	GA-rich	Low_complexity	62	[1-62]	0.9838709677419355
comp22262_g1_i1	354	0.059322033898305086	(G)n	Simple_repeat	22	[1-22]	0.9545454545454546
comp22267_g1_i1	250	0.096	(TC)n	Simple_repeat	26	[1-26]	0.9615384615384616
comp2226_g1_i1	527	0.1157495256166983	DNA2-2_SM/ClassII/?/?	Unspecified	288	[223-284]	0.21180555555555555
comp2226_g1_i2	505	0.11089108910891089	DNA2-2_SM/ClassII/?/?	Unspecified	288	[223-271]	0.16666666666666666
comp22272_g1_i1	305	0.1180327868852459	(AGCCG)n	Simple_repeat	37	[1-37]	0.972972972972973
comp22273_g1_i1	734	0.15940054495912806	Mariner-N5_AEc/ClassII/TIR/Tc1-Mariner	Unspecified	848	[57-173]	0.13679245283018868
comp22279_g1_i1	215	0.10232558139534884	(GA)n	Simple_repeat	23	[1-23]	0.9565217391304348
comp22281_g1_i1	334	0.1437125748502994	(AT)n	Simple_repeat	50	[1-50]	0.98
comp22297_g1_i1	360	0.22777777777777777	(AATTTTT)n	Simple_repeat	77	[1-77]	0.987012987012987
comp22301_g1_i1	293	0.20136518771331058	MER30_	3/ClassII/TIR/hAT	230	[5-62]	0.24782608695652175
comp2230_g2_i1	585	0.0905982905982906	piggyBac-N1_BM/ClassII/TIR/PiggyBac	Unspecified	242	[1-56]	0.22727272727272727
comp22315_g1_i1	313	0.12140575079872204	(TTAAT)n	Simple_repeat	38	[1-38]	0.9736842105263158
comp22332_g1_i1	257	0.9844357976653697	BEL-34_CQ-I	LTR/Bel-Pao	6494	[5655-5908]	0.03895903911302741
comp22337_g1_i1	418	0.18899521531100477	Copia-27_BD-I	LTR/Copia	4463	[2015-2090]	0.016804839793860632
comp22338_g1_i1	461	0.08026030368763558	(AG)n	Simple_repeat	38	[1-38]	0.9736842105263158
comp22353_g1_i1	269	0.654275092936803	Mariner-11_AEc/ClassII/TIR/Tc1-Mariner	Unspecified	2034	[75-253]	0.08751229105211406
comp22358_g1_i1	291	0.28865979381443296	GYPSM1_I-int	LTR/Gypsy	25856	[12346-12423]	0.002978032178217822
comp22386_g1_i1	270	0.25925925925925924	(AATAA)n	Simple_repeat	67	[1-67]	0.9850746268656716
comp2238_g1_i1	259	0.16602316602316602	(AT)n	Simple_repeat	45	[1-45]	0.9777777777777777
comp22391_g1_i1	425	0.12	EnSpm-21_HMa/ClassII/TIR/CACTA	Unspecified	5177	[4505-4556]	0.009851265211512458
comp22395_g1_i1	405	0.10123456790123457	(ATAAT)n	Simple_repeat	43	[1-43]	0.9767441860465116
comp2239_g1_i1	290	0.15172413793103448	Kolobok-N1_AEc/ClassII/?/Kolobok	Unspecified	8251	[4713-4757]	0.005332686947036723
comp22422_g1_i1	278	0.302158273381295	DNA-1_CQ/ClassII/?/?	Unspecified	3260	[1391-1482]	0.02791411042944785
comp22431_g1_i1	391	0.08695652173913043	(ATCATT)n	Simple_repeat	35	[1-35]	0.9714285714285714
comp22452_g1_i1	301	0.12292358803986711	(CCGT)n	Simple_repeat	38	[1-38]	0.9736842105263158
comp22469_g1_i1	279	0.14695340501792115	L2-1_HSal	LINE/Jockey	4447	[4232-4274]	0.00944456937261075
comp22482_g1_i1	468	0.07478632478632478	(AG)n	Simple_repeat	37	[1-37]	0.972972972972973
comp22487_g1_i1	504	0.24801587301587302	Mariner-2_DEu/ClassII/TIR/Tc1-Mariner	Unspecified	1670	[738-863]	0.0748502994011976
comp22500_g1_i1	415	0.07228915662650602	(GCG)n	Simple_repeat	31	[1-31]	0.967741935483871
comp22513_g1_i1	204	0.10784313725490197	(AG)n	Simple_repeat	23	[1-23]	0.9565217391304348
comp22517_g1_i1	304	0.11513157894736842	(AATATC)n	Simple_repeat	36	[1-36]	0.9722222222222222
comp22520_g1_i1	216	0.2222222222222222	Gypsy-9_CGi-I	LTR/Gypsy	4406	[956-1009]	0.012029051293690422
comp22522_g1_i1	279	0.24014336917562723	Daphne-42_LMi	LINE/Jockey	3864	[345-416]	0.018374741200828156
comp22524_g1_i1	609	0.13464696223316913	NUSIF1_TM	LTR/Gypsy	7803	[7452-7529]	0.00986799948737665
comp22538_g1_i1	380	0.14736842105263157	(TTAATA)n	Simple_repeat	59	[1-59]	0.9830508474576272
[truncated: 6,042 more rows]
